# Supplementary material
Source: PubMed Central journal article supplement (PMC7261506)
Supplement: NIHMS1590466-supplement-Supplement.pdf [file NIHMS1590466-supplement-Supplement.pdf]

## Supplementary Appendix

This appendix has been provided by the authors to give readers additional information about their work.

Supplement to: Momen NC, Plana-Ripoll O, Agerbo E, et al. Association between mental disorders and subsequent medical conditions. *N Engl J Med* 2020;382:1721-31. DOI: 10.1056/NEJMoa1915784

**Association between Mental Disorders and Later Medical Conditions**

**Supplementary material**

Natalie C. Momen, Oleguer Plana-Ripoll, Esben Agerbo, Michael E. Benros, Anders Borglum, Maria K. Christensen, Søren Dalsgaard, Louisa Degenhardt, Peter de Jonge, Jean-Christophe P. G. Debost, Morten Fenger-Grøn, Jane M. Gunn, Kim M. Iburg, Lars V. Kessing, Ronald C. Kessler, Thomas M. Laursen, Carmen C. W. Lim, Ole Mors, Preben B. Mortensen, Katherine L. Musliner, Merete Nordentoft, Carsten B. Pedersen, Liselotte V. Petersen, Anette R. Ribe, Annelieke M. Roest, Sukanta Saha, Andrew J. Schork, Kate M. Scott, Carson Sievert, Holger J. Sørensen, Terry J. Stedman, Mogens Vestergaard, Bjarni Vilhjalmsón, Thomas Werge, Nanna Weye, Harvey A. Whiteford, Anders Prior, John J. McGrath

# Supplementary Material - Association between Mental Disorders and Later Medical Conditions

---

## Contents

### Methods

|                                                   |   |
|---------------------------------------------------|---|
| Ascertainment of mental disorders .....           | 3 |
| Ascertainment of general medical conditions ..... | 3 |
| Study design .....                                | 4 |
| Statistical analysis.....                         | 7 |

### Results

|                                                                                                             |    |
|-------------------------------------------------------------------------------------------------------------|----|
| The influence of sex on pairwise associations between mental disorders and general medical conditions ..... | 9  |
| Results for three examples of mental disorder-medical condition pairs .....                                 | 10 |

### Discussion

|                              |    |
|------------------------------|----|
| Patterns of lagged HRs ..... | 14 |
| Limitations .....            | 15 |

### Figures

|                                                                                                                                                   |     |
|---------------------------------------------------------------------------------------------------------------------------------------------------|-----|
| S1-S2. Pairwise associations for general medical condition categories .....                                                                       | 16  |
| S3-S12. Pairwise associations for specific general medical conditions .....                                                                       | 19  |
| S23-S42. Lagged associations for general medical condition categories ..                                                                          | 30  |
| S43-S62. Lagged associations for specific general medical conditions ....                                                                         | 41  |
| S63-S82. Absolute risks of general medical condition categories after diagnosis of mental disorders .....                                         | 82  |
| S83-S102. Absolute risks of general medical condition categories after diagnosis of mental disorders, depending on age at first diagnosis .....   | 93  |
| S103-S122. Absolute risks of specific general medical conditions after a diagnosis of a mental disorder .....                                     | 134 |
| S123-S142. Absolute risks of specific general medical conditions after a diagnosis of mental disorders, depending on age at first diagnosis ..... | 175 |

### Tables

|                                                                                                                                                                                              |     |
|----------------------------------------------------------------------------------------------------------------------------------------------------------------------------------------------|-----|
| S1. Diagnostic classification of mental disorders considered in this study according to the ICD-10 and equivalent ICD-8 diagnoses .....                                                      | 336 |
| S2. Coding algorithm for each general medical condition and general medical condition category .....                                                                                         | 337 |
| S3. Frequencies of persons at risk and incident cases for each general medical condition category and specific general medical condition, in the total cohort of 5,940,299 individuals ..... | 339 |
| S4. Baseline characteristics of the study population .....                                                                                                                                   | 341 |

|                  |     |
|------------------|-----|
| References ..... | 342 |
|------------------|-----|

## Supplementary Material - Association between Mental Disorders and Later Medical Conditions

---

### METHODS

Information on all residents, including sex, birthdate and vital status, has been recorded in the Danish Civil Registration System since 1968,<sup>1</sup> along with a unique personal identification number that can be used to link data from national registries.

#### *Ascertainment of mental disorders*

The Danish Psychiatric Central Research Register<sup>2</sup> contains records regarding all admissions to psychiatric inpatient facilities since 1969 and visits to outpatient psychiatric departments and emergency departments since 1995. It uses the Danish modification of the International Classification of Diseases, Eighth Revision (ICD-8; from 1969 to 1993),<sup>3</sup> and Tenth Revision (ICD-10; from 1994 onwards)<sup>4</sup> diagnostic systems. For each attendance at a hospital, outpatient department or emergency department, the treating doctor can allocate: (a) a single action (or current) diagnosis, (b) a single basic (or underlying) diagnosis, (c) one or more secondary diagnoses, and (d) one or more associated diagnoses. In this study, mental disorders coded under any of these categories were included.

#### *Ascertainment of general medical conditions*

Prior's criteria<sup>5</sup> for investigating multimorbidity in the Danish registers was developed to identify cases certain conditions, including 31 chronic general medical conditions (henceforth referred to as medical conditions), by combining information on diagnoses Danish National Patient Register<sup>6</sup> and prescription medication redeemed within predefined time frames in the Danish National Prescription Register.<sup>7</sup> The Danish National Patient Register holds information on diagnoses made during hospital visits. To assess conditions predominately managed in primary care, the Danish National Prescription Register provides data on prescriptions for disease-specific medications (Anatomical Therapeutic Chemical Classification System drug codes). The criteria were designed to use in a study combining data from the registers with responses to a survey. In our study, we were able to also add data from the Cause of Death Register<sup>8</sup>, in order to capture medical conditions which people died from, but which had not received a hospital diagnosis of or relevant treatment for. The Danish National Patient Register and Cause of Death Register employed ICD-10 codes during the period of interest.

## Supplementary Material - Association between Mental Disorders and Later Medical Conditions

### Study design

Follow-up commenced on 01/01/2000 or at the earliest age a person became “at risk” for each respective mental disorder (Table S1), whichever occurred later. Follow-up ended at medical condition onset or censoring (death, emigration, or April 10, 2017), whichever came first. A ‘wash-out’ period in the five years before follow-up (1995-1999) excluded prevalent medical condition cases from their respective analysis. During the ‘washout period’ individuals who had been diagnosed with, or received prescribed medication for, the medical condition of interest before the observation period were identified. They were considered prevalent cases and excluded from the analyses (i.e. ‘washed-out’).

The periods mental disorders and medical conditions were observed in are depicted below.

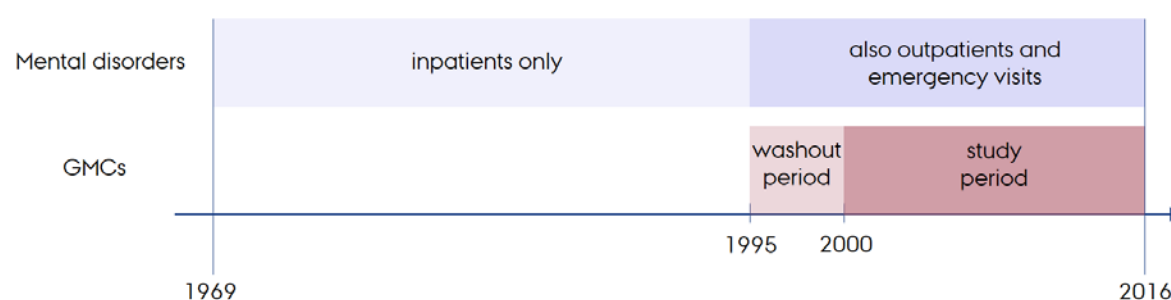

The longest period an individual was followed-up for to ascertain whether a medical condition diagnosis was made, was 17 years (2000-2016). However, mental disorders could be diagnosed between 1969-2016), so the interval between diagnosis of a mental disorder and medical condition of interest could reach a maximum of 48 years (1969-2016).

Among all incident medical condition category cases ( $n = 7\,107\,848$ ), a mental disorder was diagnosed on the same day in  $<0.01\%$  of the instances. In studies related to comorbidity, it is important to include these individuals in the time-to-event analyses. In keeping with our previous study,<sup>9</sup> we broke these ties by moving a proportion of the mental disorder diagnoses to one day earlier. Those moved were selected at random, and the proportion to be moved was decided for each mental disorder-medical condition pair by calculating the percentage of cases in which the

## Supplementary Material - Association between Mental Disorders and Later Medical Conditions

mental disorder occurred before the medical condition among those with both disorders occurring within a 5-year window.

Mental disorders were treated as a time-varying exposure when considering relative risks, as shown in the diagram below: individuals were 'unexposed' to a specific disorder, moving to the 'exposed' group on the day they were diagnosed for the first time with this disorder. A mental disorder had to be diagnosed before a medical condition in order to be considered an exposure for the medical condition. We further split the exposure variable into a time-varying variable with seven categories: one unexposed category and six exposed categories depending on the time since the first diagnosis of the mental disorder: 0-6 months, >6-12 months, >1-2 years, >2-5 years, >5-10 years, >10-15 years, or >15 years. Models including this estimated lagged HRs and were used to investigate whether the association changed depending on the time since mental disorder onset.

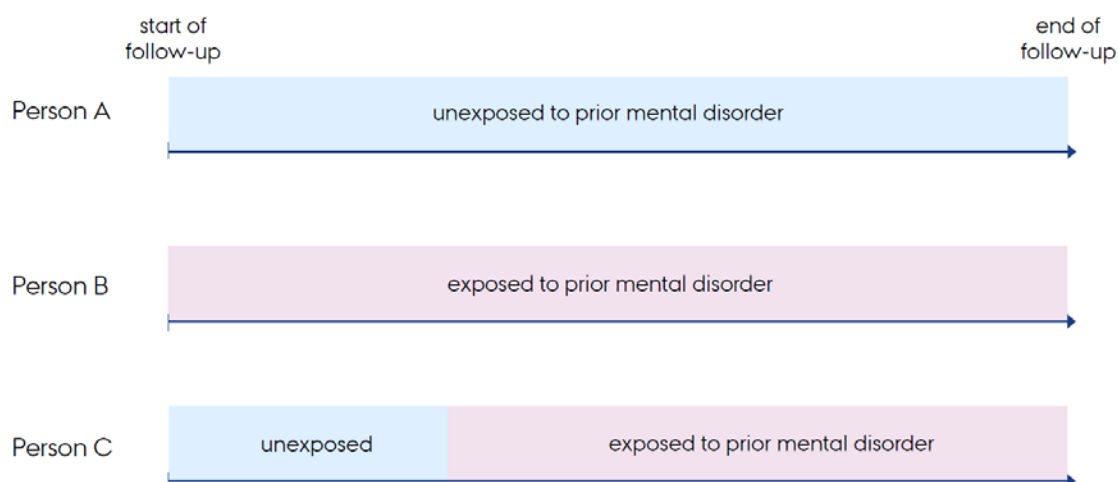

For every index person with a mental disorder, up to five “references” were randomly selected. They were matched on sex and date of birth (born within 30 days). Additionally, they had to be “free” of the relevant mental disorder (not received a diagnosis) at or before the age that the index person was diagnosed with it, when follow-up for cumulative incidence proportions started. Follow-up for obtaining cumulative incidence proportions starts at the age the relevant mental disorder is diagnosed, among those who receive a diagnosis. For those in the reference group, it starts at the exact age the person they were matched to was when they received a diagnosis. For simplicity, throughout this paper, start of cumulative incidence

## Supplementary Material - Association between Mental Disorders and Later Medical Conditions

---

proportion follow-up has been referred to as the 'date of diagnosis' for both those with mental disorders and their reference group. People in the reference group could theoretically act as a 'reference' for multiple index people. They could also be index persons themselves, if they went on to develop the mental disorder at a later age than that they had been selected to be a reference individual at. For a minority of index people, five sex and date of birth matches could not be found – some had one to four reference individuals.

Cumulative incidence proportions were stratified by sex and age (at diagnosis of the mental disorder) groups (<20, 20-<40, 40-<60, 60-<80, and ≥80 years). They provide absolute risks that can be interpreted as the percentage of individuals among those with and without a particular mental disorder who develop the medical condition after a specified time.

The Lexis diagram below shows the age attained by people born in different years when information on mental disorders and medical conditions is being considered. For example, for the cohort of individuals born in the year 1940, diagnoses of mental disorders will be looked at between the ages of 29 and 75 years; and medical condition status will be ascertained between the ages of 60 and 76 years. In this cohort, we were able to identify (and exclude from the analysis) prevalent medical conditions (which appeared in the hospital register or for which prescription medication was received for) between the ages of 55 and 59 years. We were not able to identify any diagnoses occurring before the age of 55 years.

## Supplementary Material - Association between Mental Disorders and Later Medical Conditions

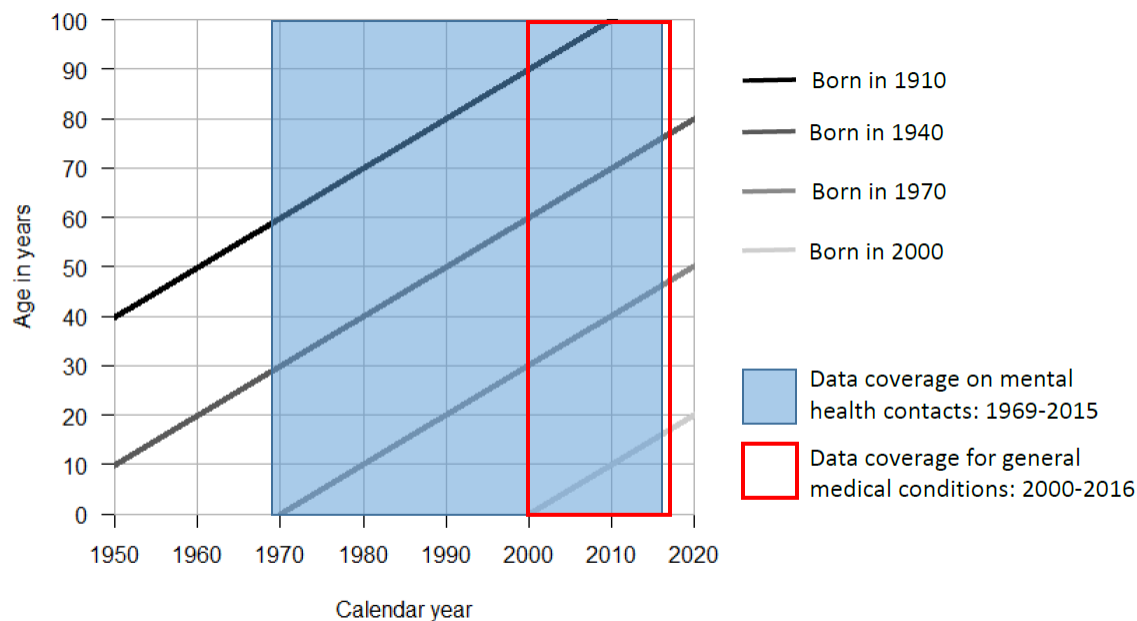

The analysis was run to consider the risk of developing each medical condition after a first diagnosis of each mental disorder. For each analysis, the development of only one medical condition was considered i.e. follow-up for the medical condition of interest continued until medical condition diagnosis or censoring (due to death, emigration or end of follow-up), regardless of the diagnosis of other medical conditions (with the exception of dyslipidemia, where follow-up was additionally censored if ischemic heart disease was diagnosed).

### *Statistical analysis*

Cox proportional hazards models were used to calculate relative risks. When the rates of a medical condition among the exposed and unexposed are not proportional over time, the estimates can be interpreted as an average HR over the entire follow-up period.<sup>10</sup>

To avoid multicollinearity, the count variable used when adjusting for prior mental disorders could take the values 0, 2, 3 or 4+ (i.e. not 1; if only 1 other mental disorder had been diagnosed prior to the mental disorder of interest, the count variable was set at 0).

All analyses were performed on the secured platform of Statistics Denmark using STATA/MP version 15.1 (Stata Corporation, College Station, Texas, USA). As some mental disorder-medical condition pairs are infrequent, some estimates/plots have



## **Supplementary Material - Association between Mental Disorders and Later Medical Conditions**

---

insufficient data. Estimates were not displayed for HRs if there were fewer than four exposed cases, or for cumulative incidence proportions, if fewer than 15 cases or 50 persons were at risk.

## Supplementary Material - Association between Mental Disorders and Later Medical Conditions

---

### RESULTS

*The influence of sex on pairwise associations between mental disorders and medical conditions*

Sex-specific hazard ratios for the associations between mental disorders and medical condition categories are shown in Supplemental Figures S1-S2. Despite some differences in estimates, the general findings with respect to medical conditions for Substance Use Disorders, Mood Disorders, Neurotic Disorders and Personality Disorders did not vary by sex. Estimates for Urogenital Conditions (which comprised of kidney disorders and prostate disorders, the latter of which females are not at risk of) were normally higher for women with mental disorders than for men with mental disorders when compared to their respective “unexposed” populations. For the other pairs, the patterns were similar, but with some notable differences, for example, for Schizophrenia, the HR for Cancer was lower for males (HR 0.96 [95% CI 0.92-0.99]) than for females (HR 1.12 [95% CI 1.09-1.16]). The HR for Gastrointestinal Conditions were higher for males (HR 1.29 [95% CI 1.25-1.34]) than females (HR 1.17 [95% CI 1.13-1.21]); as was the HR for Musculoskeletal Conditions (HR 0.99 [95% CI 0.92-1.07] for males, HR 0.84 [95% CI 0.81-0.88] for females).

Sex-specific estimates for the 31 medical conditions can be seen in Supplementary Figures S13-22. Sex-specific lagged HRs are found in Supplementary Figures S43-S62 for medical condition categories, and in Supplementary Figures S73-S82 for the 31 specific medical conditions.

Cumulative incidence proportions differed by sex for certain mental disorder-medical condition pairs, however in most cases the shape of the cumulative incidence proportion curves were the same for males and females, even where there were differences in magnitude. Sex-specific estimates can be found in Supplementary Figures S113-S122 and S133-S142.

## **Supplementary Material - Association between Mental Disorders and Later Medical Conditions**

---

*Results for three examples of mental disorder-medical condition pairs*

### **Mood Disorders – Circulatory Conditions**

For Circulatory Conditions, 744 738 persons were excluded from the study population because they had this type of medical condition before follow-up began. The remaining 5 195 561 were considered as 'at risk' of an incident Circulatory Condition and were included in the analysis. Of these, 1,359,330 (26.2%) were diagnosed with a Circulatory Condition for the first time in the follow-up period.

Model A's HR (adjusted for age, calendar time and sex) for developing any Circulatory Condition for those diagnosed with a Mood Disorder, compared to those who were not diagnosed with a Mood Disorder, was 1.43 (95% CI 1.41-1.44) [Figure 1]. Model B's HR (additionally adjusted for prior mental disorders in addition to Mood Disorders) was 1.32 (95% CI 1.31-1.34) [Figure 1]. Sex-specific Model B estimates were 1.48 (95% CI 1.46-1.50) for males and 1.30 (95% CI 1.29-1.32) for females. Considering specific medical conditions within the broad category of Circulatory Conditions, the highest HR was seen for stroke at 1.46 (95% CI 1.44-1.48); and the lowest for atrial fibrillation at 1.02 (95% CI 1.00-1.04).

With respect to the pattern of HRs over time since the onset of the mental disorder, the highest HR between Mood Disorders and Circulatory Conditions is seen in the first six months (2.39 [95% CI 2.29-2.48], followed by a gradual drop in HRs over time (after 15 years, the HR was 1.18 [95% CI 1.17-1.20]). Hazard ratios were similar throughout follow-up for males and females.

The results also foreground the general pattern of earlier age onset for mental disorders such as Mood Disorders, compared to later age of onset for many of the medical conditions. For example, among those who were diagnosed with a Mood Disorder, only 0.4% received a subsequent diagnosis of a Circulatory Condition within the first month. In the first 5 years after being diagnosed with Mood Disorders, 14.5% were diagnosed with a Circulatory Condition. However, after 15 years since Mood Disorder diagnosis, the percentage was more substantial (40.9%). In the reference group, the comparative estimates were 0.1% within the first month (with follow-up starting from the age the individuals that the reference group were matched

## **Supplementary Material - Association between Mental Disorders and Later Medical Conditions**

---

to were first diagnosed with a Mood Disorder), 9.8% within 5 years, and 32.6% after 15 years. In other words, after 15 years, approximately 4 out of 10 people with a Mood Disorder had developed a Circulatory Condition, compared to 3 out of 10 in the matched non-Mood Disorder reference group.

When we stratified these cumulative incidence estimates by age of diagnosis of the Mood Disorder, after 15 years of observation, the differences between the Mood Disorder versus the matched reference groups were greater. For the 60-80 years and 80+ age groups, CIPs for the Mood Disorder group were slightly higher than those of the matched reference group but the estimates became more congruent. At the end of the 15-year follow-up CIPs for Circulatory Conditions were 70.70% (95% CI 69.71-71.66) for the Mood Disorder group and 74.71 (95% CI 74.27-75.13) for the matched reference group.

### ***Substance Use Disorders – Gastrointestinal Conditions***

After “washing out” prevalent cases of Gastrointestinal Conditions, there were 5,858,583 people left in the population. During follow-up 327,697 of these individuals were diagnosed with a Gastrointestinal Condition for the first time.

The Model A HR (adjusted for age, calendar time and sex) for developing a Gastrointestinal Condition was 3.61 (95% CI 3.56-3.66) among those who received a diagnosis of Substance Use Disorders, compared to those who did not. Model B's HR (additionally adjusted for prior mental health comorbidity) was slightly lower at 3.35 (95% CI 3.30-3.40). Sex-specific estimates for Model B were 3.60 (95% CI 3.54-3.67) for males and 3.01 (95% CI 2.94-3.08) for females.

Considering time since Substance Use Disorder diagnosis, gave the highest HR of being diagnosed with a Gastrointestinal Condition within 0-6 months compared to those with no Substance Use Disorder diagnosis, with a Model B HR of 5.64 (95% CI 5.21-6.10). After 6 months from time of diagnosis the risk dropped, with HRs of 4.17 and 4.27 (95% CIs 3.80-4.57 and 4.00-4.55) for 6-12 months and 1-2 years, respectively. They dropped further at 2-15 years after diagnosis to between 3.70 and 3.86, with a final drop to 2.88 (95% CI 2.82-2.94) when more than 15 years had

## **Supplementary Material - Association between Mental Disorders and Later Medical Conditions**

---

passed since Substance Use diagnosis. Estimates were higher throughout follow-up for males with Substance Use than females with Substance Use. Looking at estimates for the medical conditions which make up the Gastrointestinal Conditions group, it can be seen that these results are driven by chronic liver conditions, which have an all-persons HR of 12.72 (95% CI 12.43-13.01) for the entire follow-up period.

Among those with a Substance Use Disorder diagnosis, 18.1% (95% CI 17.8-18.4%) received a diagnosis of a Gastrointestinal Condition within 15 years of their Substance Use Disorder diagnosis. Cumulative incidence among the matched reference group was 5.6% (95% CI 5.5-5.6%)

Proportions of those who were diagnosed with a Gastrointestinal Condition were higher among those diagnosed with Substance Use Disorders, compared to their reference population, if diagnoses were made before the age of 80 years. When a first diagnosis of Substance Use Disorders was made above the age of 80 years, the proportion who received a Gastrointestinal Condition diagnosis within 15 years was higher among the references. This is likely to be due to earlier mortality in those with Substance Use Disorders.

### ***Neurotic Disorders – Cancers***

After removing individuals who had been diagnosed with Cancer prior to the study period, 5,857,164 people remained. During follow-up, 481,012 were diagnosed with cancer for the first time.

Those diagnosed with a Neurotic Disorder had a HR of 1.17 (95% CI 1.16-1.19) for Model A (adjusted for age, calendar time and sex) and 1.13 (95% CI 1.11-1.15) for Model B (additionally adjusted for prior mental health comorbidity) for subsequent Cancer diagnosis, compared with those not diagnosed with a Neurotic Disorder. The Model B estimate was 1.06 (95% CI 1.03-1.08) for males and 1.18 (95% CI 1.15-1.20) for females.

## **Supplementary Material - Association between Mental Disorders and Later Medical Conditions**

---

The increased risk of being diagnosed with Cancer was greatest in the first 6 months following Neurotic Disorder diagnosis (HR 1.59, 95% CI 1.45-1.73). From 6 months onwards, HRs dropped to between 1.03 and 1.16. Hazard ratios for females were generally slightly higher than for males.

Within 15 years of diagnosis, 6.5% (95% CI 6.3-6.6%) of those with a Neurotic Disorder diagnosis subsequently received a diagnosis of Cancer. Among the matched reference group, the cumulative incidence of Cancer was 6.5% (95% CI 6.4-6.5%).

Diagnoses of Cancer within the 15 year follow-up were very similar among those diagnosed with a Neurotic Disorder, compared to their reference group, if diagnoses were made before the age of 60 years. When a first diagnosis of a Neurotic Disorder was made above 60 years of age, the proportion who were diagnosed with Cancer was similar for approximately 5 years, after which time the proportion was greater among the reference group.

## Supplementary Material - Association between Mental Disorders and Later Medical Conditions

### DISCUSSION

#### *Patterns of lagged HRs*

The HRs for many mental disorder-medical condition pairs were highest closest to the diagnosis of the mental disorder. During the subsequent years, while there was a relatively steady decline in HRs, they still remained elevated. Behavioral Disorders-Circulatory Conditions, Neurotic Disorders-Neurological Conditions, and Schizophrenia-Circulatory Conditions were among the pairs to exhibit this pattern. It may reflect the interplay between (a) a small increased risk of medical condition from the onset of the mental disorder, and (b) the rising prevalence of some types of medical condition in the general population as they age, leading to convergence of hazards. This pattern suggests that medical conditions may be ‘brought forward’ among those with mental disorders.

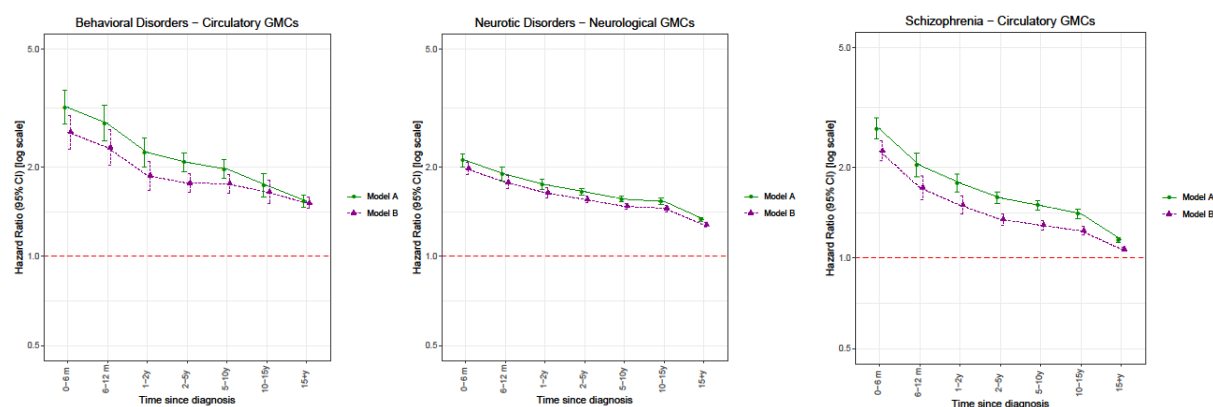

Another pattern seen quite frequently displayed a relatively high HR close to mental disorder diagnosis, followed by a steep drop. This was seen for Mood Disorders-Cancer, Substance Use Disorders-Hematological Conditions, and Neurotic Disorders-Urogenital Conditions, among others. There are a number of possible explanations for this pattern. Berkson’s bias<sup>11</sup> could explain the increased detection of medical conditions soon after first hospital contact with a mental disorder; there may be increased detected related screening in accordance with guidelines following certain mental disorders or due to physician behaviour after presentation. Some treatments for mental disorders (e.g. antipsychotic medications) may be associated with a subsequent increase in risk of medical conditions (e.g. consequences of obesity). Some medical conditions that can take some time to confirm diagnoses of (e.g. cancer or HIV may lead to symptoms of depression or anxiety. Alternatively, the

## Supplementary Material - Association between Mental Disorders and Later Medical Conditions

pattern may reflect the reality of diagnostic uncertainty, for example psychiatric symptoms could be a sign of undetected cancers.<sup>12</sup>

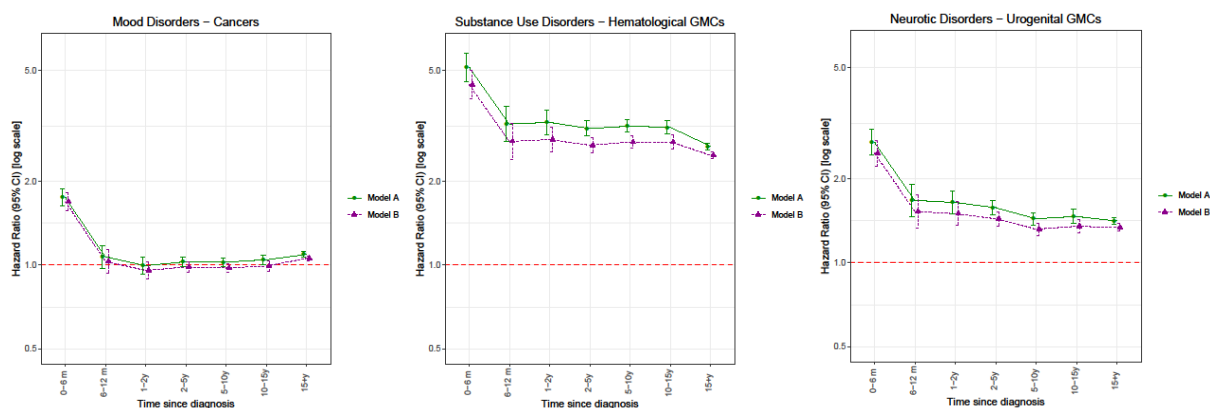

### Limitations

As described in the main discussion section, there will be under-detection of mental disorders and medical conditions. This is partly due to lack of data on diagnoses made in general practice. While cases treated only in primary care may be identified from data on disease-specific prescription redemption (e.g. diabetes mellitus and COPD), case ascertainment using diagnoses relies on those made in secondary care or as causes of death. For some disorders, e.g. schizophrenia, this is likely to have limited impact in terms of misclassification. However, other disorders, like depression, are predominantly treated in primary care.<sup>13</sup> For these disorders, milder cases are likely to be missed.



## Supplementary Material - Association between Mental Disorders and Later Medical Conditions

---

### FIGURES

Figures S1-S2. Pairwise associations for general medical condition categories

Hazard ratios (HRs) and 95% confidence intervals (CIs) comparing the risk of persons with and without a diagnosis of each prior mental disorder receiving a later diagnosis within a general medical condition category. Both Model A (green points) and Model B (purple triangles) are displayed.

*The x-axes range from 0.5-9.*

S1. Males

S2. Females

**Figure S1. Hazard ratios (HRs) and 95% confidence intervals (CIs) comparing the risk for males with and without a diagnosis of a prior mental disorder receiving a later diagnosis within a general medical condition category**

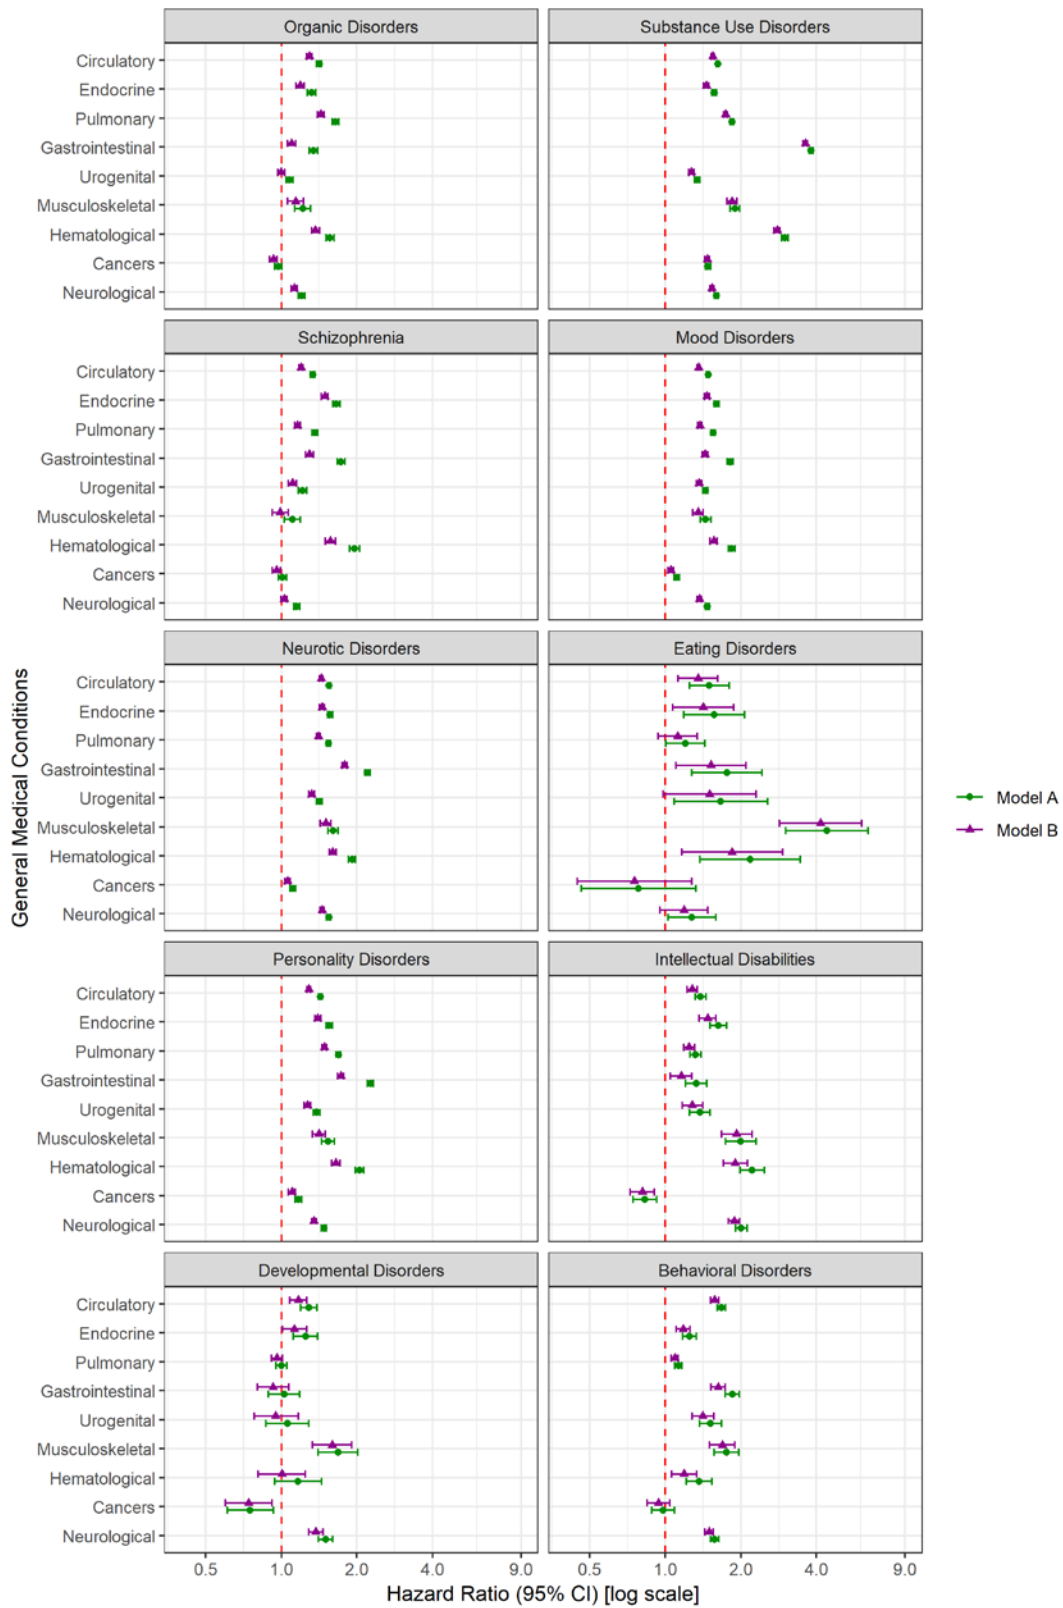

**Figure S2. Hazard ratios (HRs) and 95% confidence intervals (CIs) comparing the risk of females with and without a diagnosis of a prior mental disorder receiving a later diagnosis within a general medical condition category**

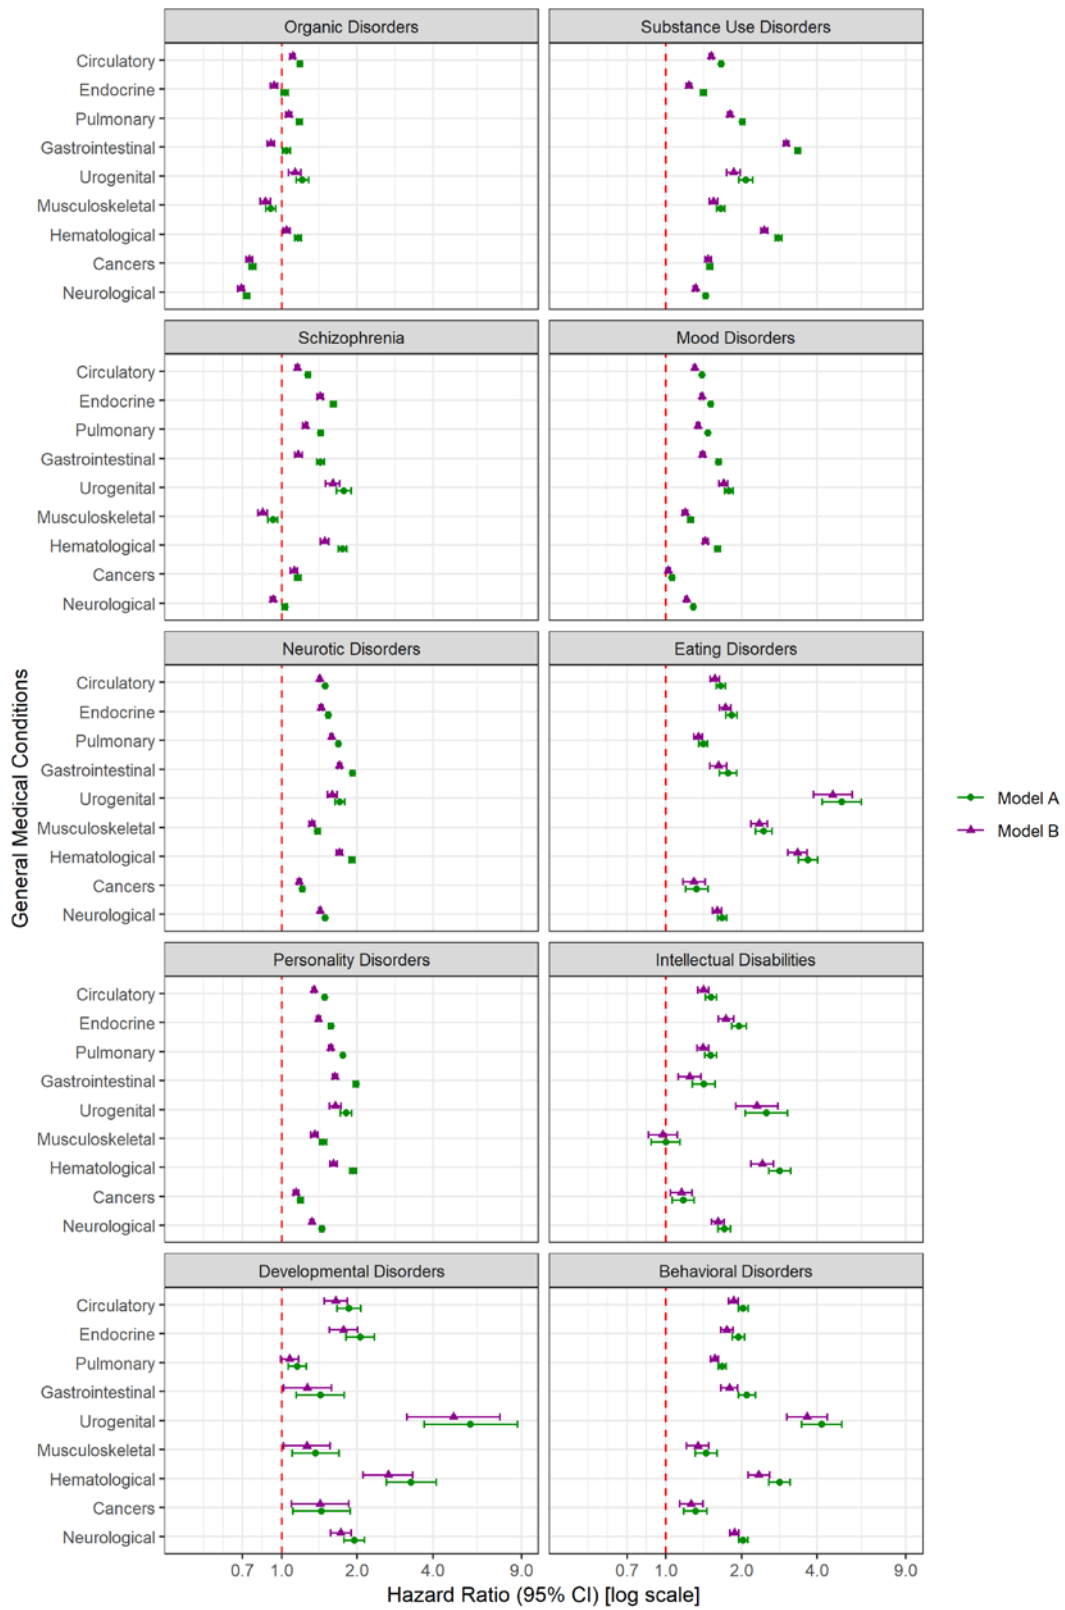

**Figures S3-S12. Pairwise associations for specific general medical conditions**

**Hazard ratios (HRs) and 95% confidence intervals (CIs) comparing the risk of persons with and without a diagnosis of a prior mental disorder receiving a later diagnosis within a general medical condition. Estimates with fewer than four exposed cases are not shown.**

*Displaying estimates for Model A (green points; adjusting for sex and calendar time) and Model B (purple triangles; further adjustment for other mental disorders that had onset prior to the mental disorder of interest).*

*The x-axes range from 0.25-15*

- S3. Organic Disorders
- S4. Substance Use Disorders
- S5. Schizophrenia
- S6. Mood Disorders
- S7. Neurotic Disorders
- S8. Eating Disorders
- S9. Personality Disorders
- S10. Intellectual Disorders
- S11. Developmental Disorders
- S12. Behavioral Disorders

*Displaying Model B estimates for males (blue triangles) and females (red points)*

*The x-axes range from 0.25-18*

- S13. Organic Disorders
- S14. Substance Use Disorders
- S15. Schizophrenia
- S16. Mood Disorders
- S17. Neurotic Disorders
- S18. Eating Disorders
- S19. Personality Disorders
- S20. Intellectual Disorders
- S21. Developmental Disorders
- S22. Behavioral Disorders

**Figure S3. HRs and 95% CIs of being diagnosed with each general medical condition comparing those with and without a prior diagnosis of Organic Disorders**

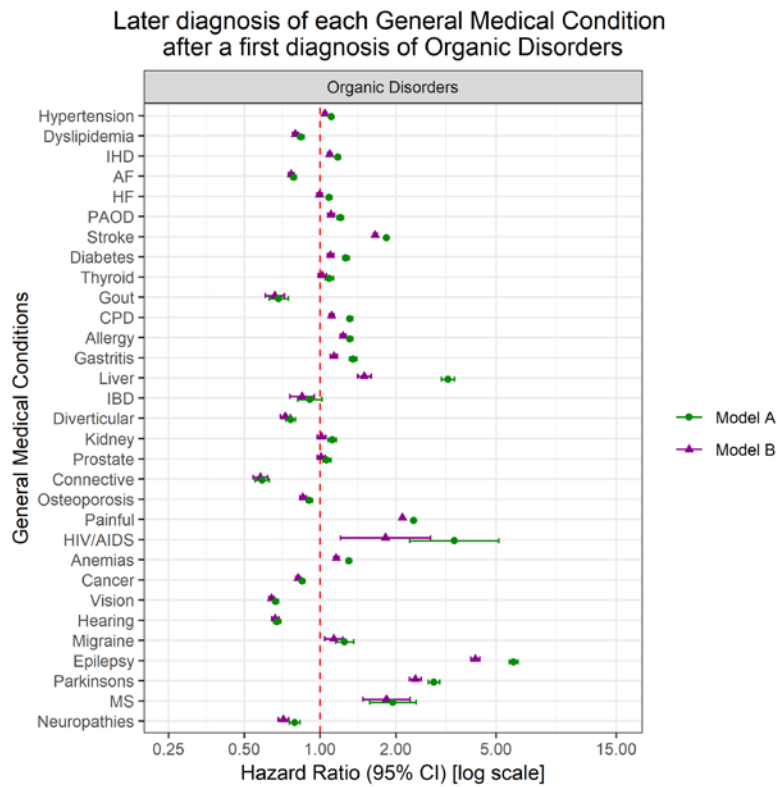

**Figure S4. HRs and 95% CIs of being diagnosed with each general medical condition comparing those with and without a prior diagnosis of Substance Use Disorders**

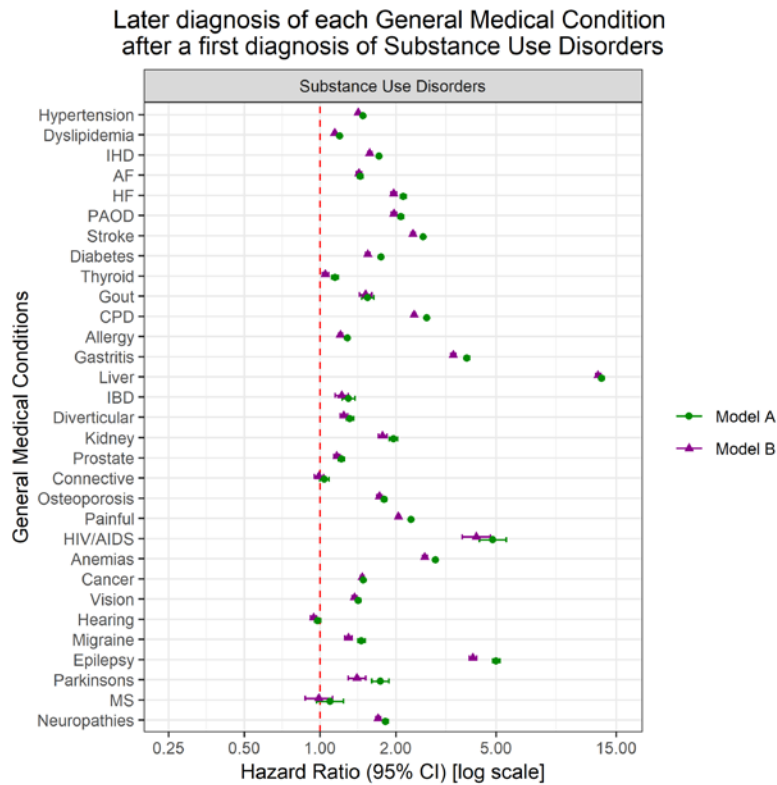

**Figure S5. HRs and 95% CIs of being diagnosed with each general medical condition comparing those with and without a prior diagnosis of Schizophrenia**

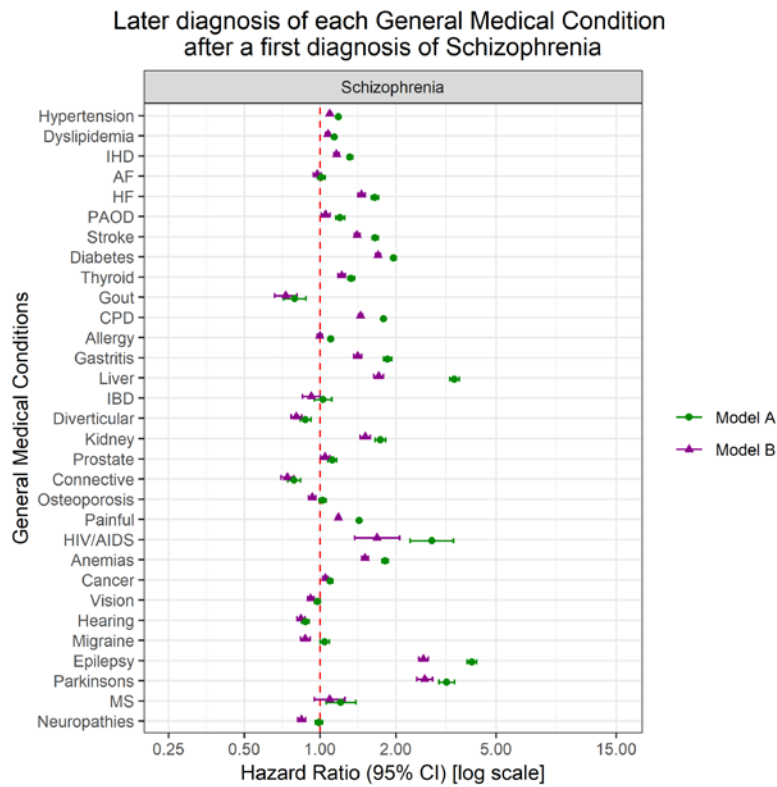

**Figure S6. HRs and 95% CIs of being diagnosed with each general medical condition comparing those with and without a prior diagnosis of Mood Disorders**

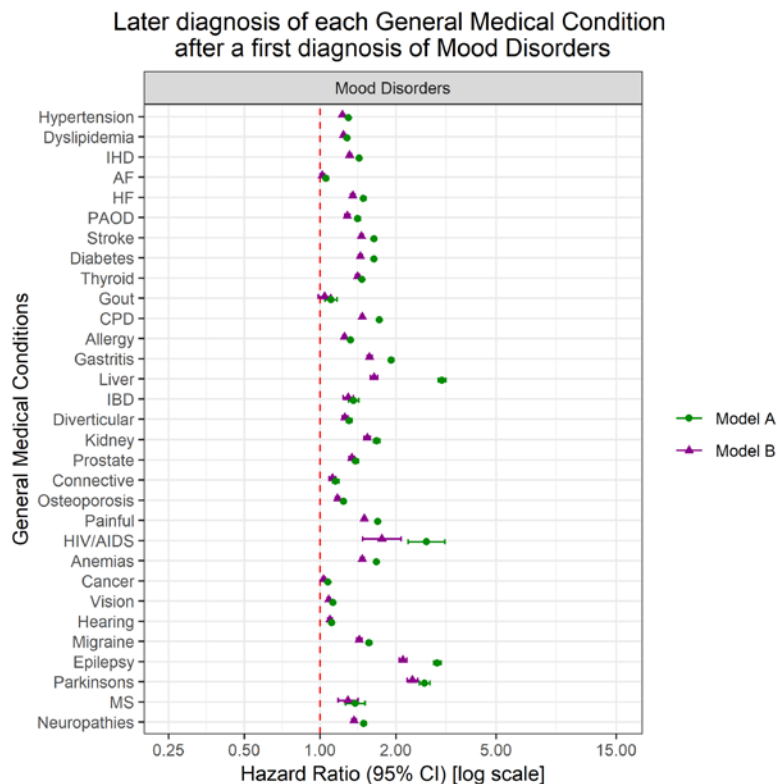

**Figure S7. HRs and 95% CIs of being diagnosed with each general medical condition comparing those with and without a prior diagnosis of Neurotic Disorders**

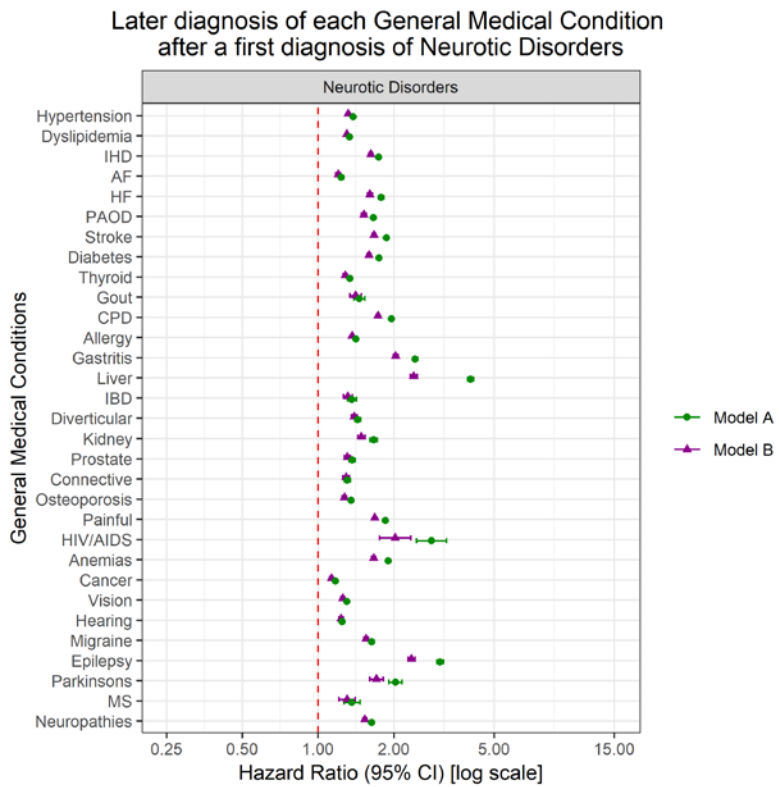

**Figure S8. HRs and 95% CIs of being diagnosed with each general medical condition comparing those with and without a prior diagnosis of Eating Disorders**

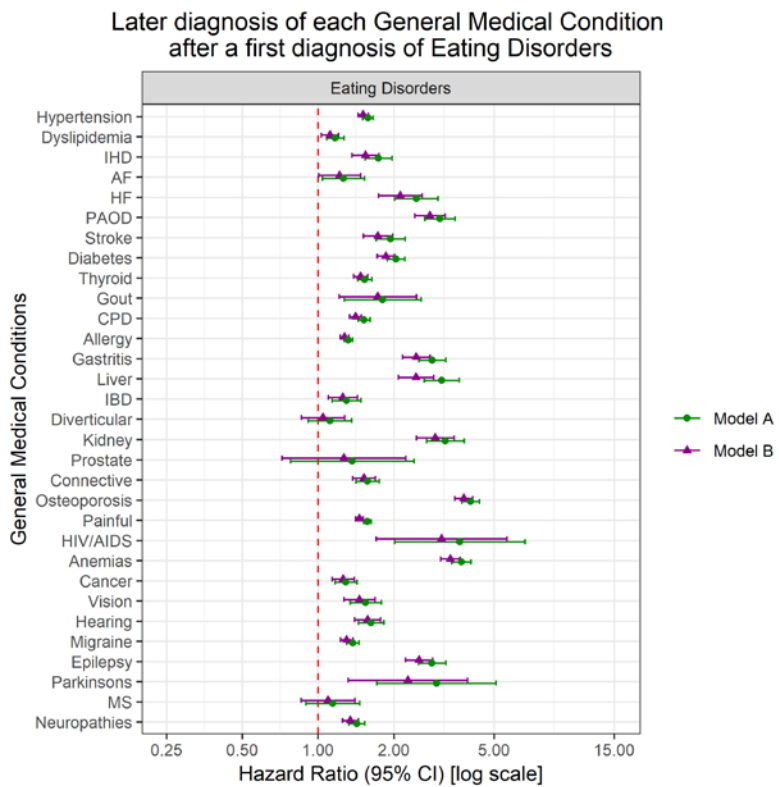

**Figure S9. HRs and 95% CIs of being diagnosed with each general medical condition comparing those with and without a prior diagnosis of Personality Disorders**

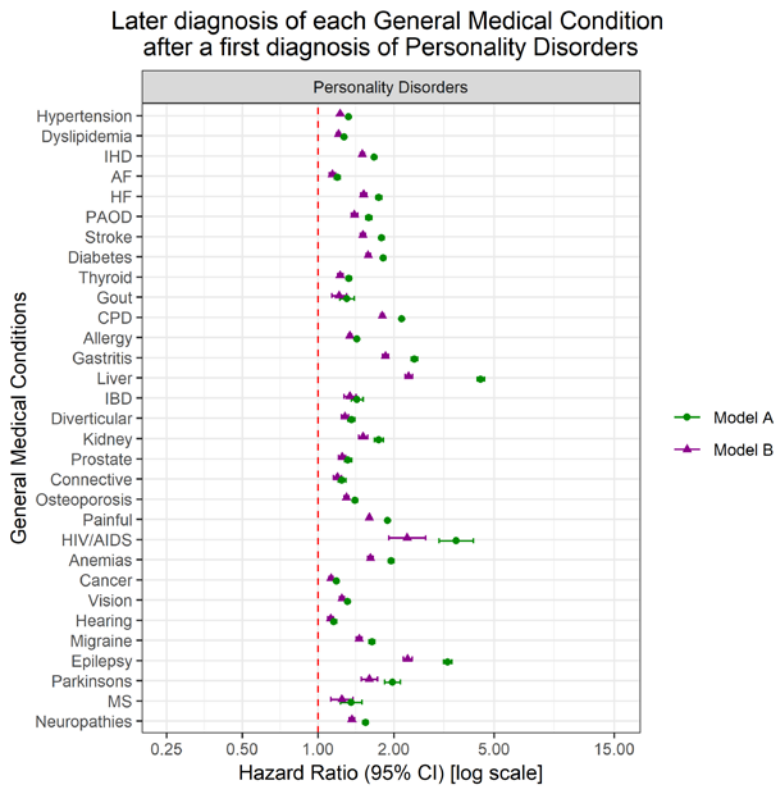

**Figure S10. HRs and 95% CIs of being diagnosed with each disorder comparing those with and without a prior diagnosis of Intellectual Disabilities**

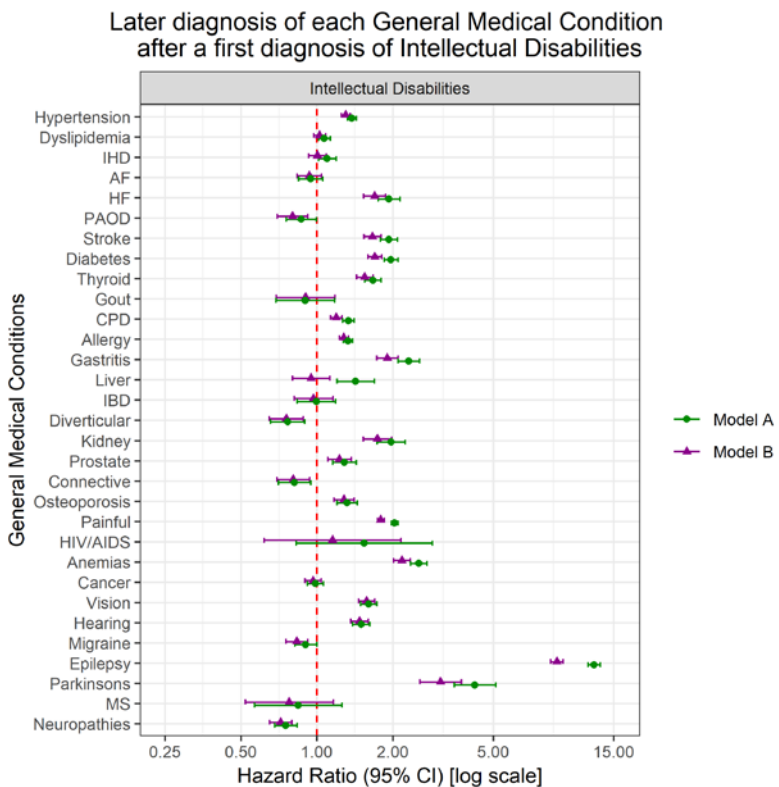



**Figure S11. HRs and 95% CIs of being diagnosed with each disorder comparing those with and without a prior diagnosis of Developmental Disorders**

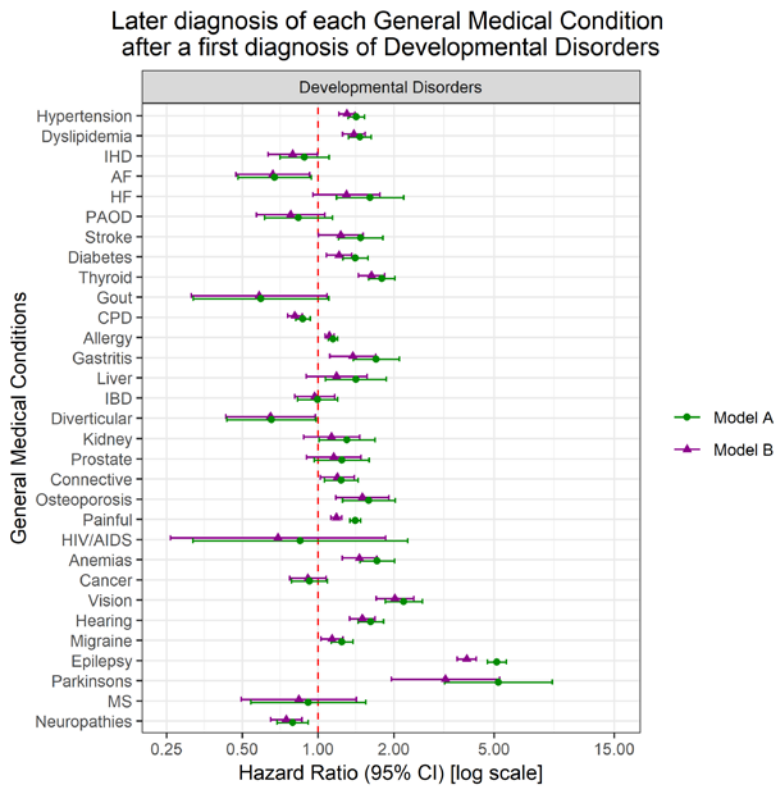

**Figure S12. HRs and 95% CIs of being diagnosed with each general medical condition comparing those with and without a prior diagnosis of Behavioral Disorders**

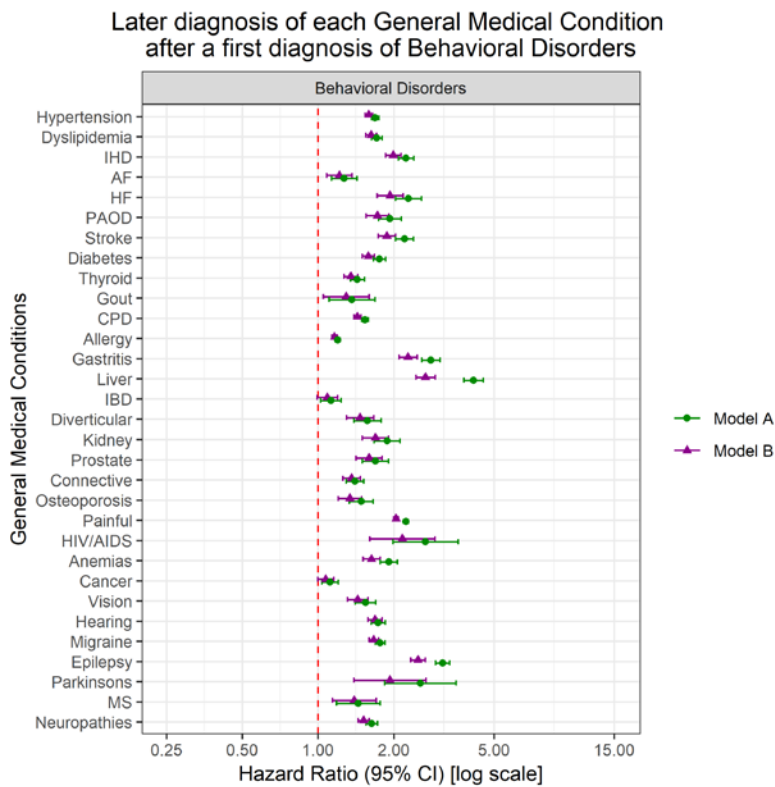

**Figure S13. Sex-specific HRs and 95% CIs of being diagnosed with each general medical condition comparing those with and without a prior diagnosis of Organic Disorders**

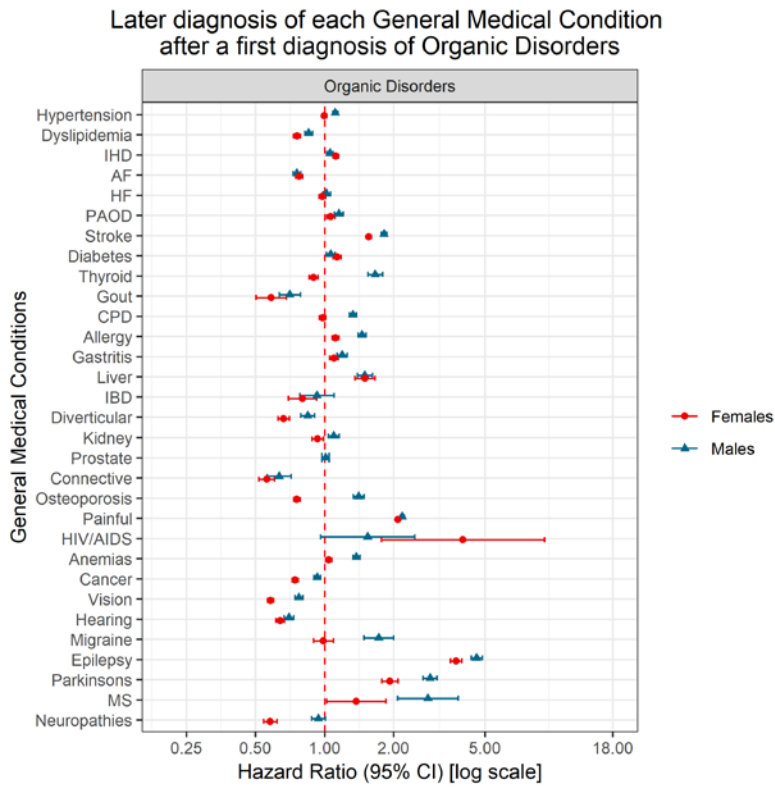

**Figure S14. Sex-specific HRs and 95% CIs of being diagnosed with each general medical condition comparing those with and without a prior diagnosis of Substance Use Disorders**

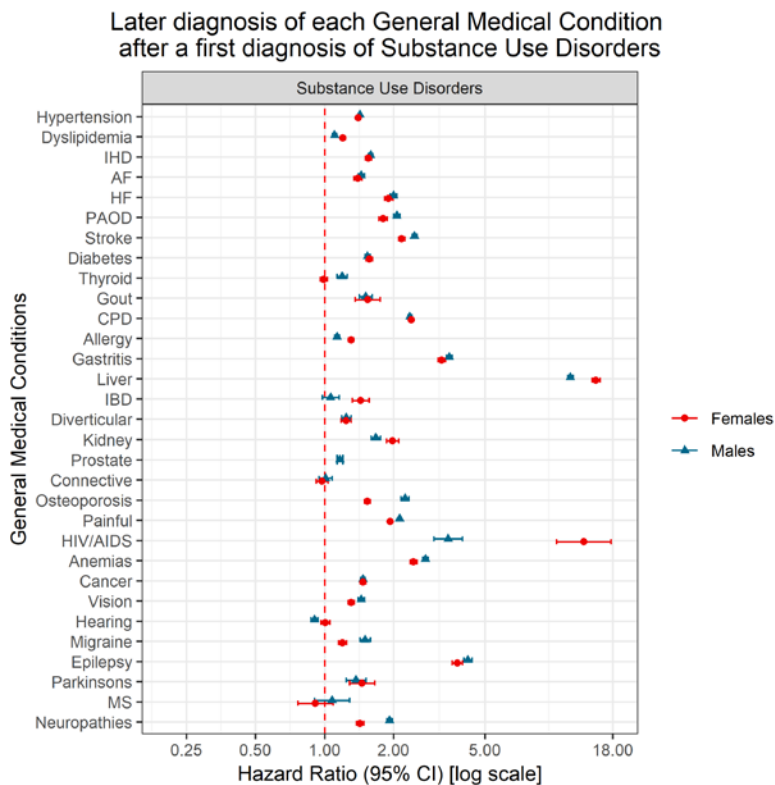

**Figure S15. Sex-specific HRs and 95% CIs of being diagnosed with each general medical condition comparing those with and without a prior diagnosis of Schizophrenia**

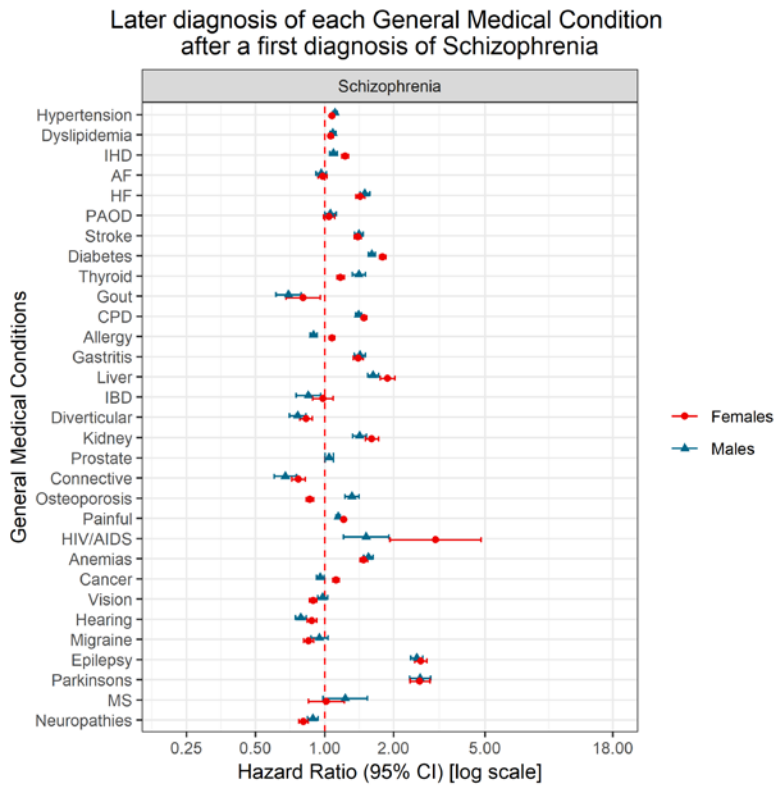

**Figure S16. Sex-specific HRs and 95% CIs of being diagnosed with each general medical condition comparing those with and without a prior diagnosis of Mood Disorders**

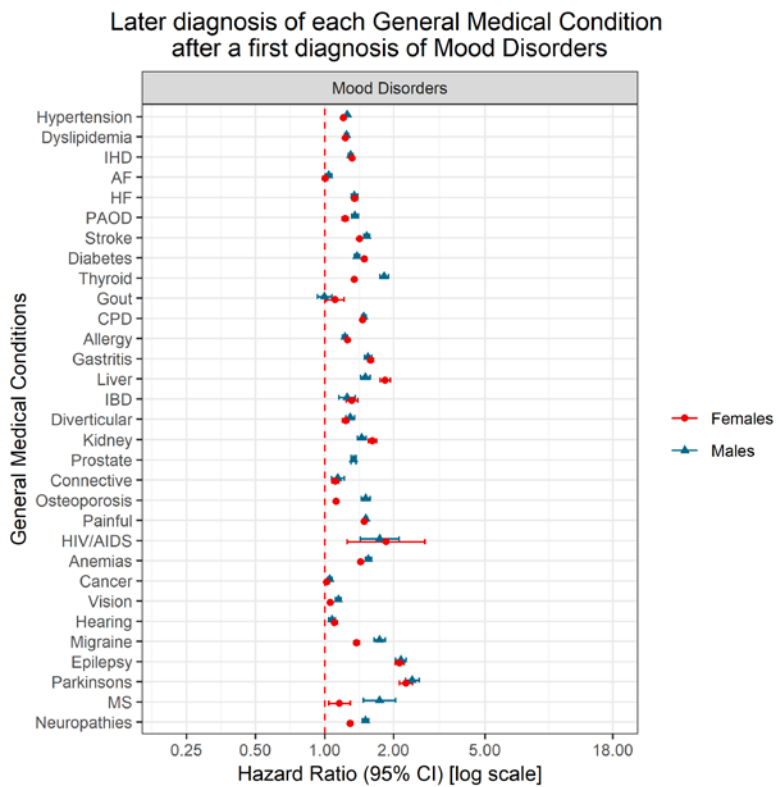

**Figure S17. Sex-specific HRs and 95% CIs of being diagnosed with each general medical condition comparing those with and without a prior diagnosis of Neurotic Disorders**

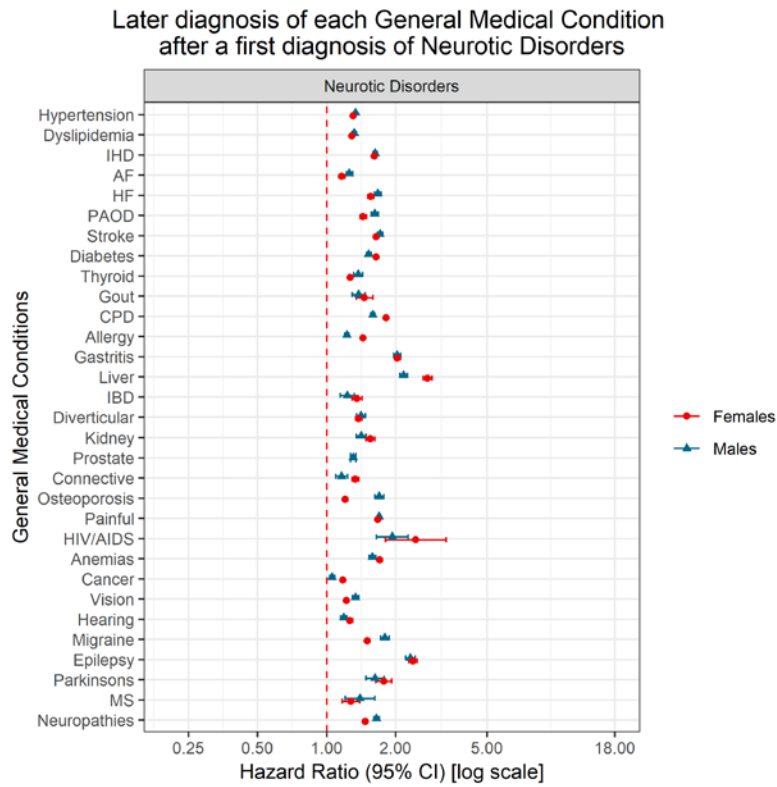

**Figure S18. Sex-specific HRs and 95% CIs of being diagnosed with each general medical condition comparing those with and without a prior diagnosis of Eating Disorders**

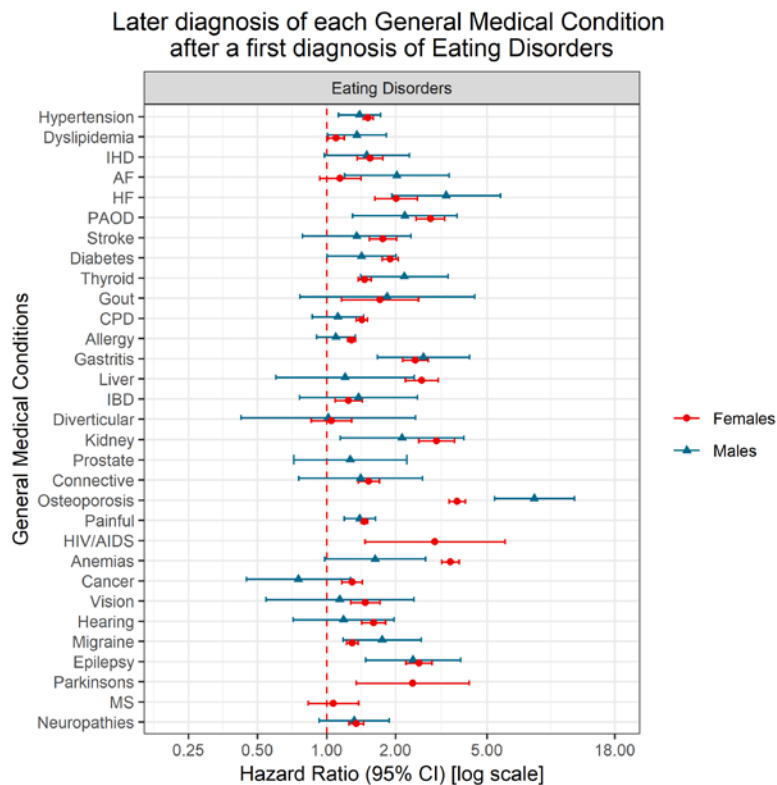

**Figure S19. Sex-specific HRs and 95% CIs of being diagnosed with each general medical condition comparing those with and without a prior diagnosis of Personality Disorders**

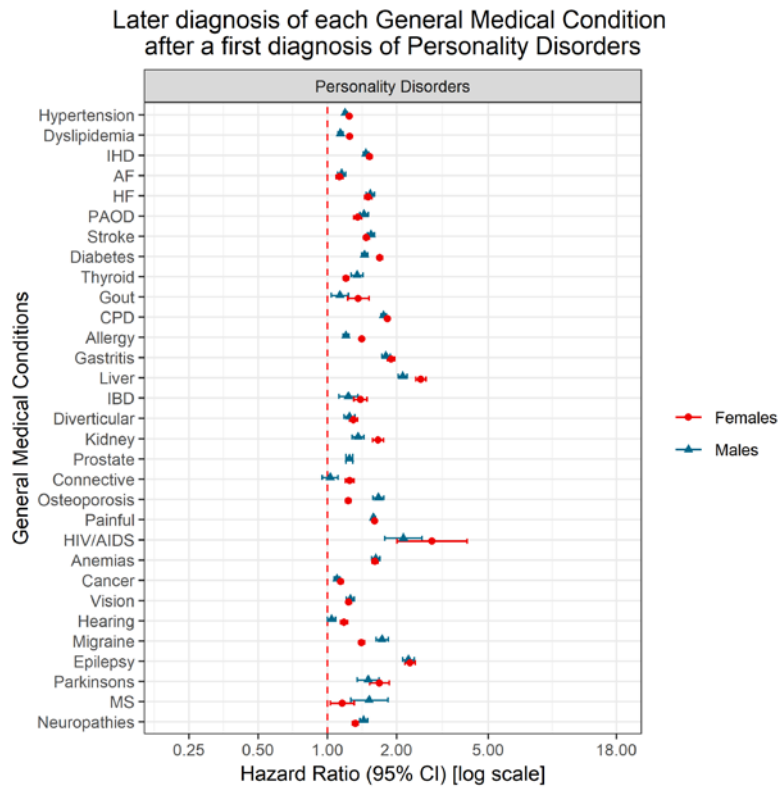

**Figure S20. Sex-specific HRs and 95% CIs of being diagnosed with each general medical condition comparing those with and without a prior diagnosis of Intellectual Disabilities**

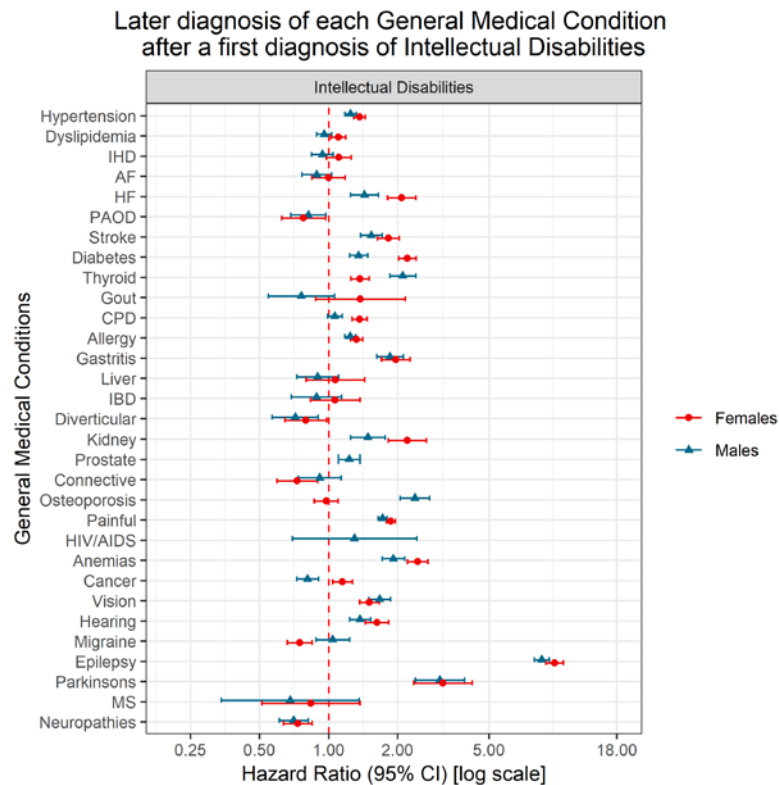

**Figure S21. Sex-specific HRs and 95% CIs of being diagnosed with each general medical condition comparing those with and without a prior diagnosis of Developmental Disorders**

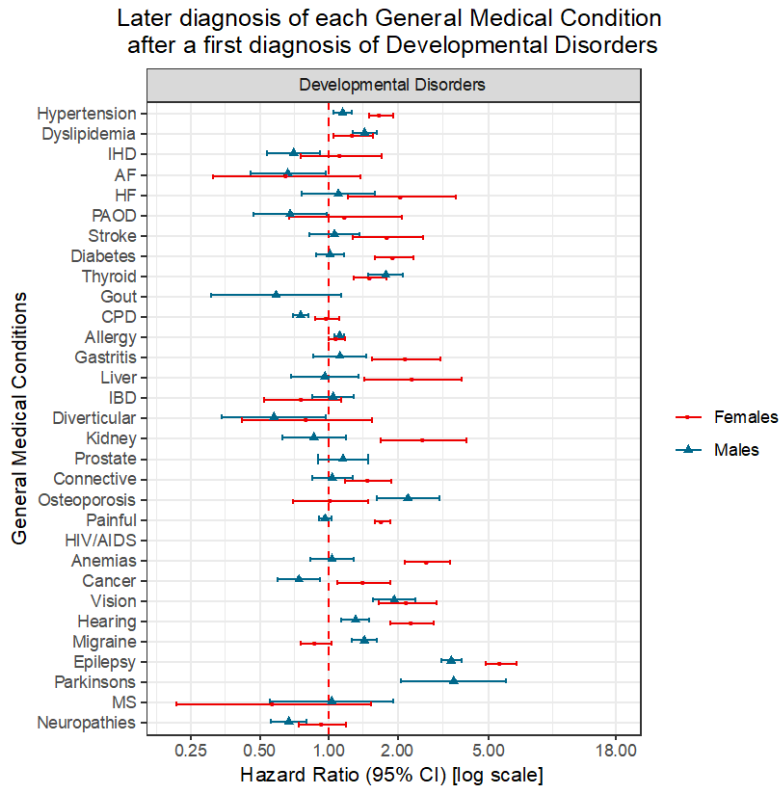

**Figure S22. Sex-specific HRs and 95% CIs of being diagnosed with each general medical condition comparing those with and without a prior diagnosis of Behavioral Disorders**

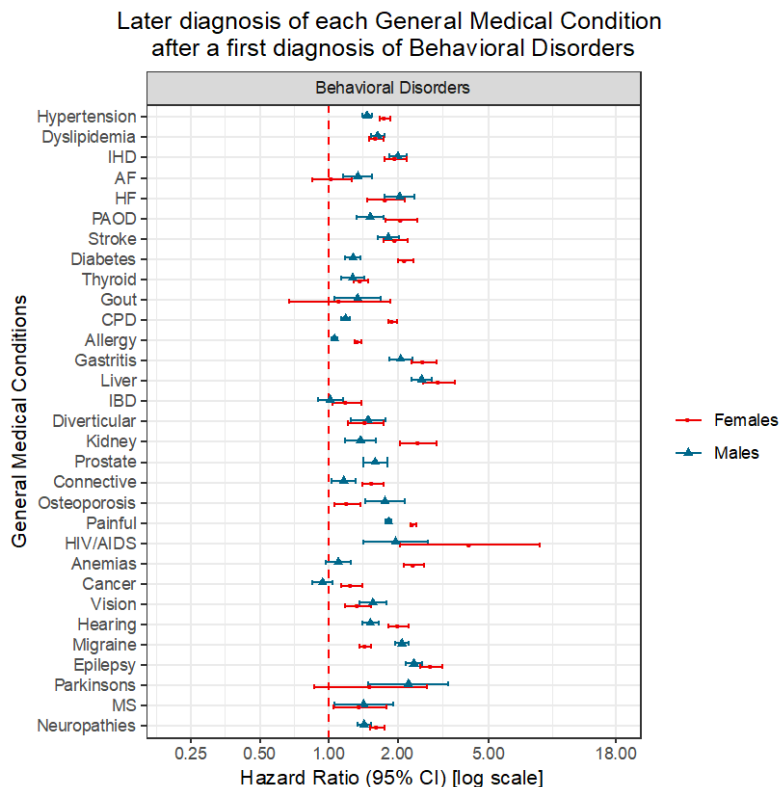

## Figures S23-S42. Lagged associations for general medical condition categories

The following Figures show the hazard ratios (HRs) of receiving a diagnosis within a general medical condition category, depending on whether individuals had previously been diagnosed with a mental disorder, and depending on time since the first diagnosis of this disorder. Estimates were obtained via Cox proportional hazards models with age as the underlying time scale. The reference category are persons without a diagnosis of the mental disorder. The line of unity is shown as a red dashed line in each plot. Graphs of estimates are shown with variable (differing for each set of graphs) y-axes. Estimates with fewer than four exposed cases are not shown.

*Displaying estimates for Model A (green points; adjusting for sex and calendar time) and Model B (purple triangles; further adjustment for other mental disorders that had onset prior to the mental disorder of interest)*

*The y-axis varies for each graph, however they range from a minimum of 0.2 to a maximum of 15*

- S23. Organic Disorders
- S24. Substance Use Disorders
- S25. Schizophrenia
- S26. Mood Disorders
- S27. Neurotic Disorders
- S28. Eating Disorders
- S29. Personality Disorders
- S30. Intellectual Disorders
- S31. Developmental Disorders
- S32. Behavioral Disorders

*Displaying Model B estimates for males (blue triangles) and females (red points)*

*The y-axis varies for each graph, however they range from a minimum of 0.2 to a maximum of 40*

- S33. Organic Disorders
- S34. Substance Use Disorders
- S35. Schizophrenia
- S36. Mood Disorders
- S37. Neurotic Disorders
- S38. Eating Disorders
- S39. Personality Disorders
- S40. Intellectual Disorders
- S41. Developmental Disorders
- S42. Behavioral Disorders

**eFigureS23. HRs and 95% CIs of being diagnosed with each medical condition comparing those with and without a prior diagnosis of Organic Disorders, depending on time since first diagnosis**

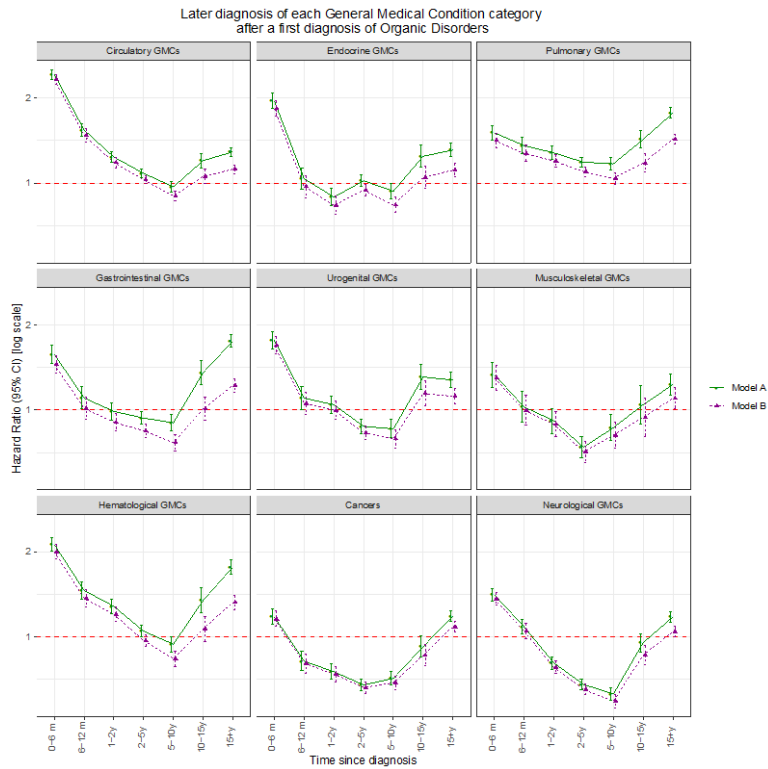

**Figure S24. HRs and 95% CIs of being diagnosed with each medical condition comparing those with and without a prior diagnosis of Substance Use Disorders, depending on time since first diagnosis**

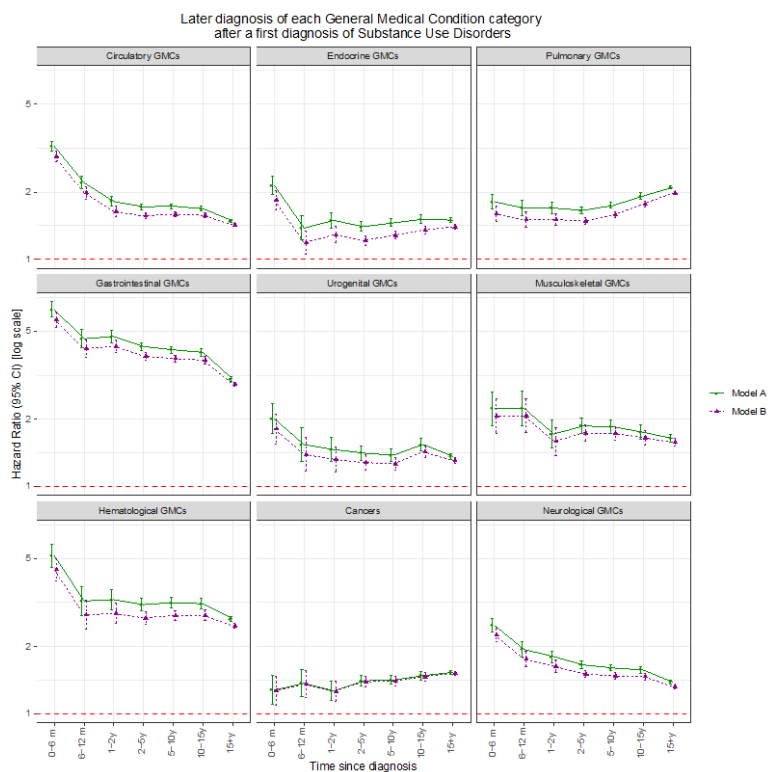



**Figure S25. HRs and 95% CIs of being diagnosed with each medical condition comparing those with and without a prior diagnosis of Schizophrenia, depending on time since first diagnosis**

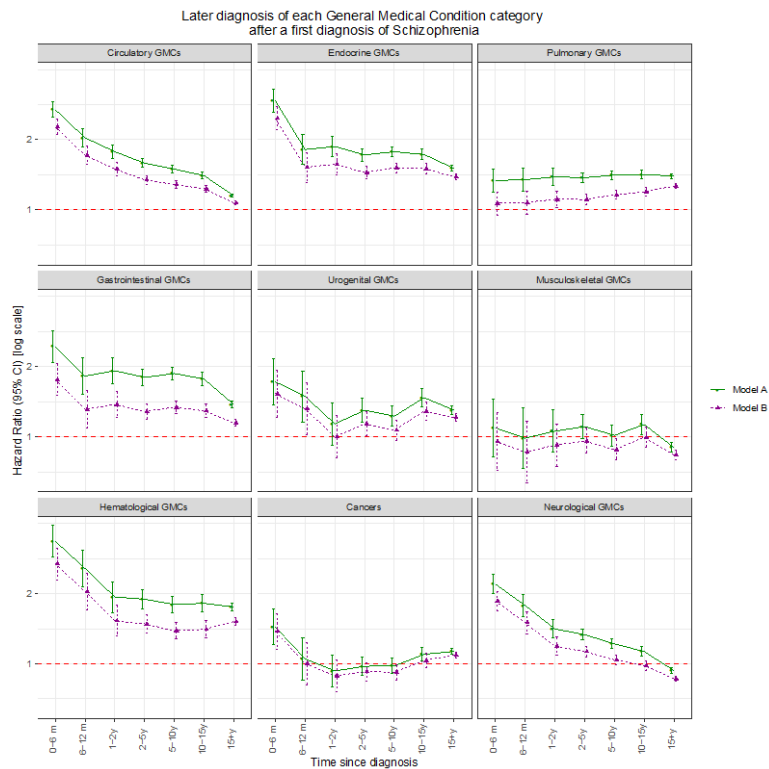

**Figure S26. HRs and 95% CIs of being diagnosed with each medical condition comparing those with and without a prior diagnosis of Mood Disorders, depending on time since first diagnosis**

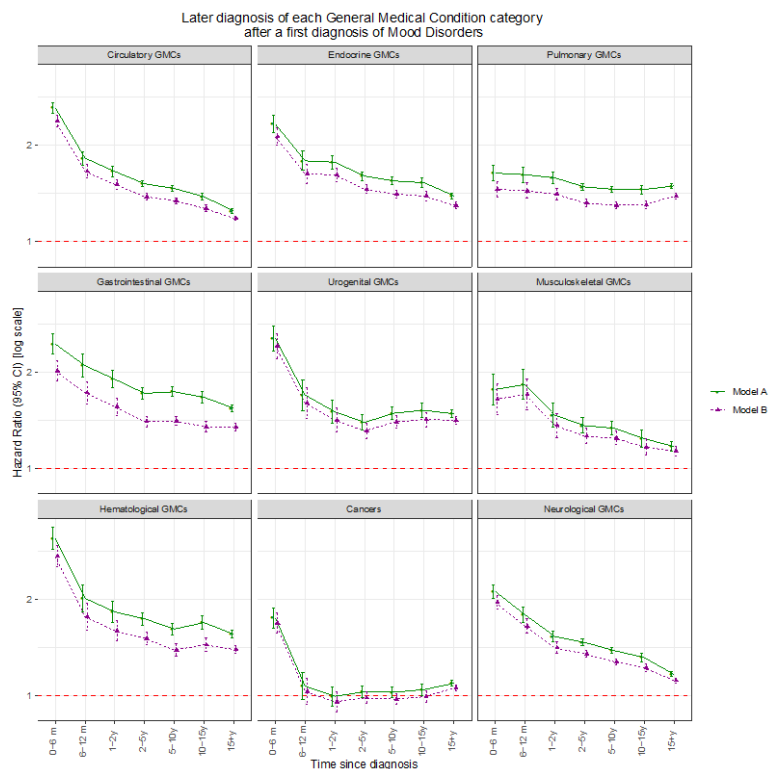

**Figure S27. HRs and 95% CIs of being diagnosed with each medical condition comparing those with and without a prior diagnosis of Neurotic Disorders, depending on time since first diagnosis**

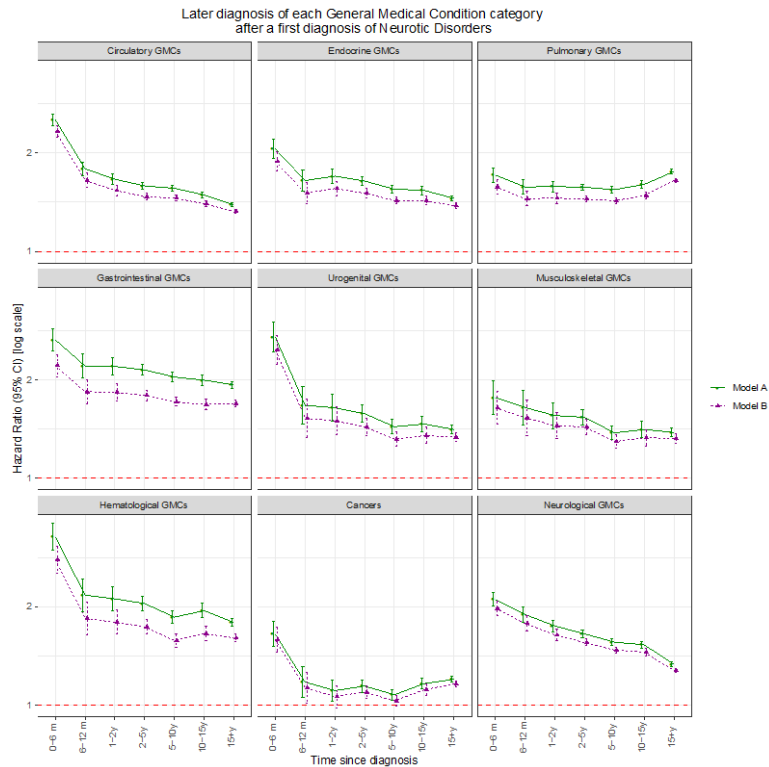

**Figure S28. HRs and 95% CIs of being diagnosed with each medical condition comparing those with and without a prior diagnosis of Eating Disorders, depending on time since first diagnosis**

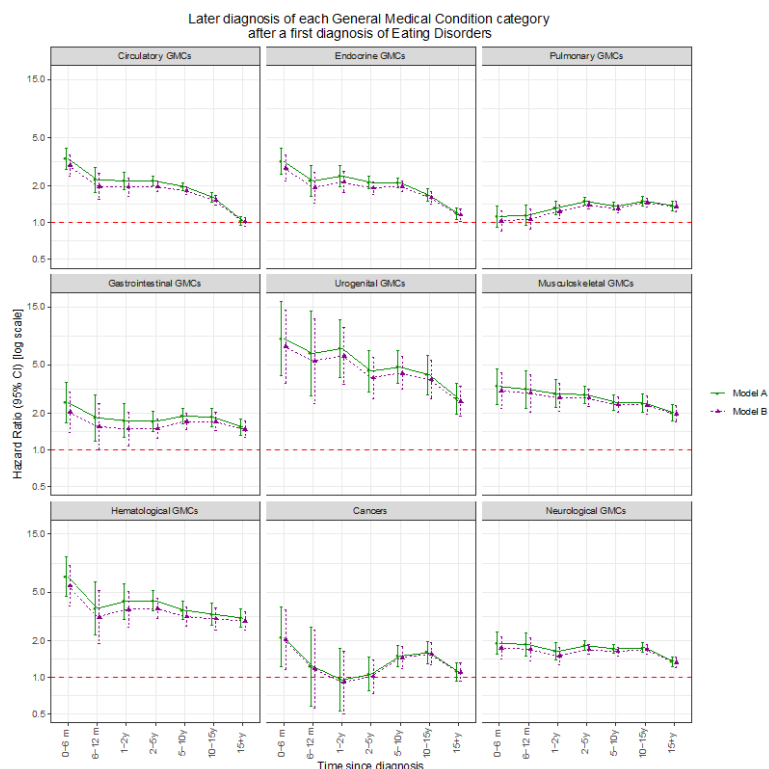

**Figure S29. HRs and 95% CIs of being diagnosed with each medical condition comparing those with and without a prior diagnosis of Personality Disorders, depending on time since first diagnosis**

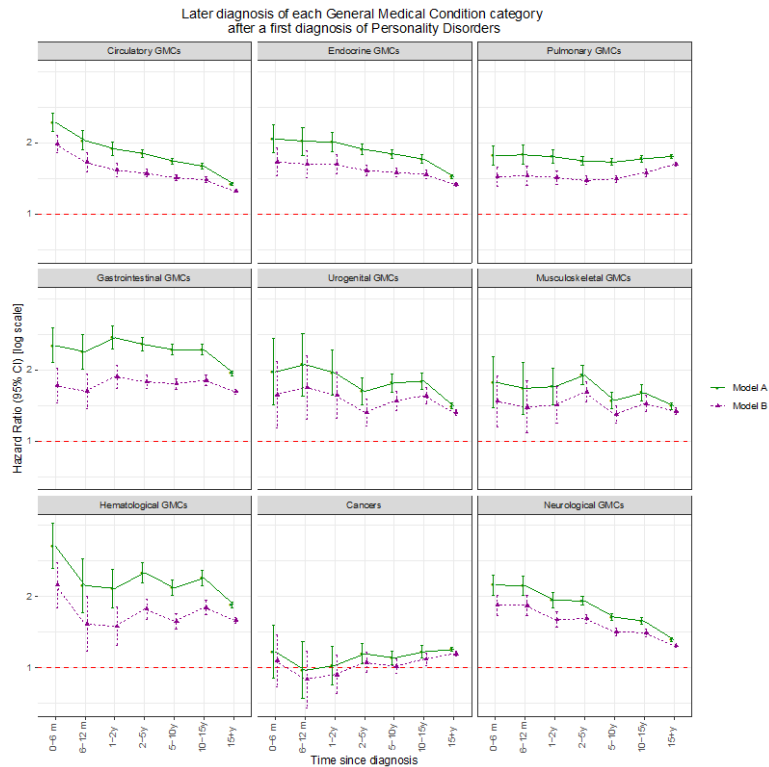

**Figure S30. HRs and 95% CIs of being diagnosed with each medical condition comparing those with and without a prior diagnosis of Intellectual Disabilities, depending on time since first diagnosis**

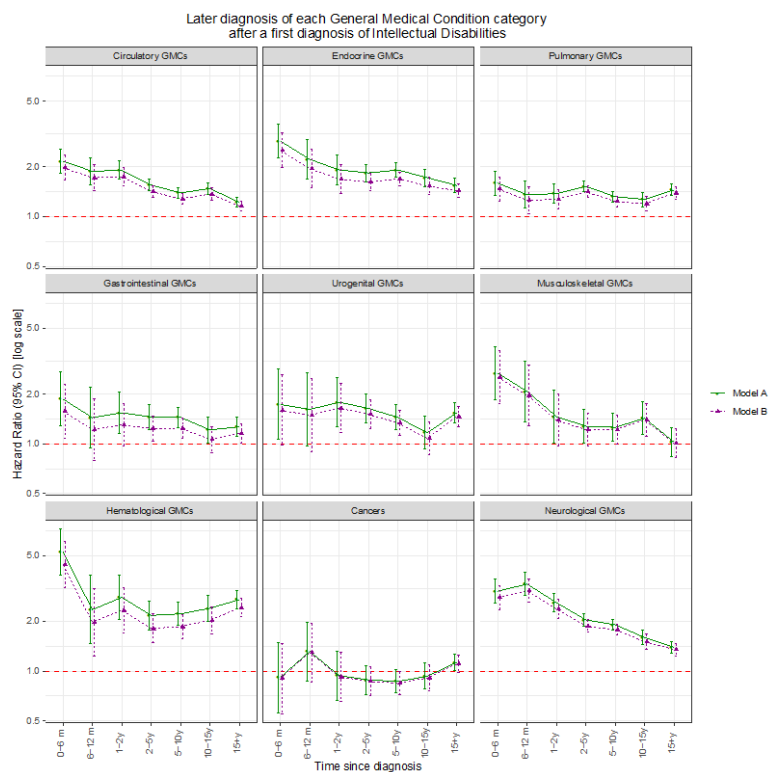

**Figure S31. HRs and 95% CIs of being diagnosed with each medical condition comparing those with and without a prior diagnosis of Developmental Disorders, depending on time since first diagnosis**

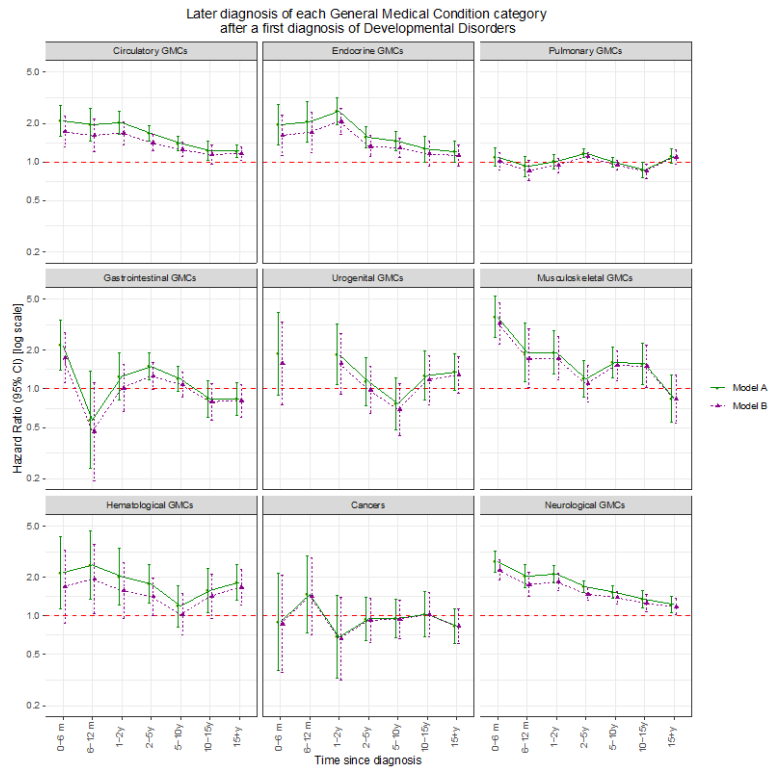

**Figure S32. HRs and 95% CIs of being diagnosed with each medical condition comparing those with and without a prior diagnosis of Behavioral Disorders, depending on time since the first diagnosis**

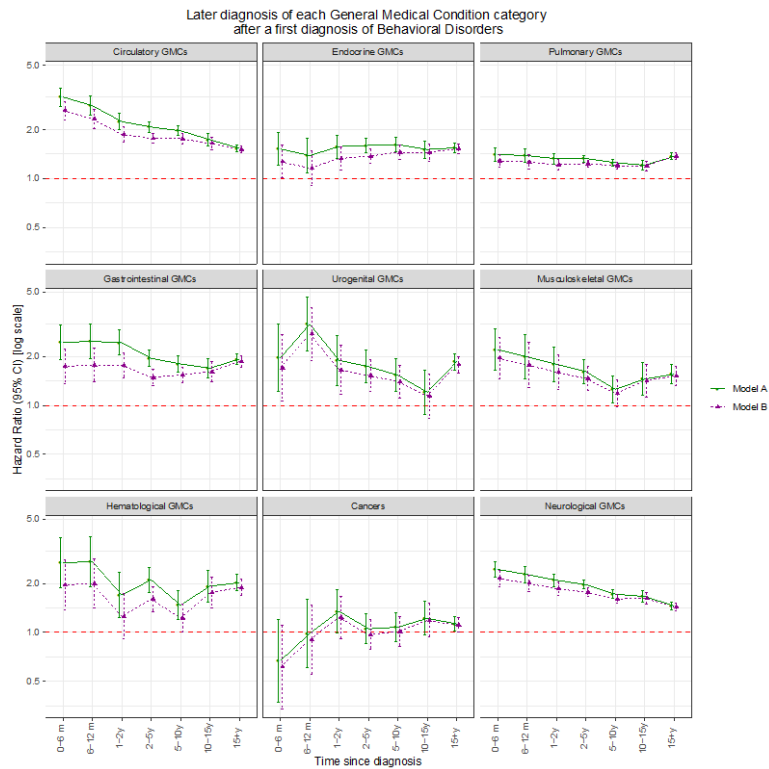

**Figure S33. Sex-specific HRs and 95% CIs of being diagnosed with each medical condition comparing those with and without a prior diagnosis of Organic Disorders, depending on time since first diagnosis**

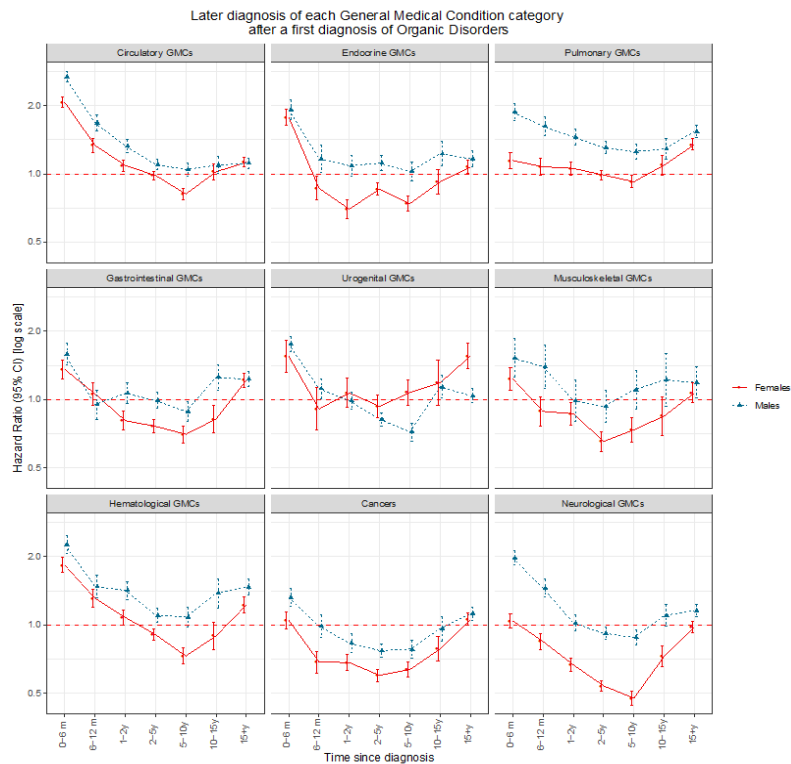

**Figure S34. Sex-specific HRs and 95% CIs of being diagnosed with each medical condition comparing those with and without a prior diagnosis of Substance Use Disorders, depending on time since first diagnosis**

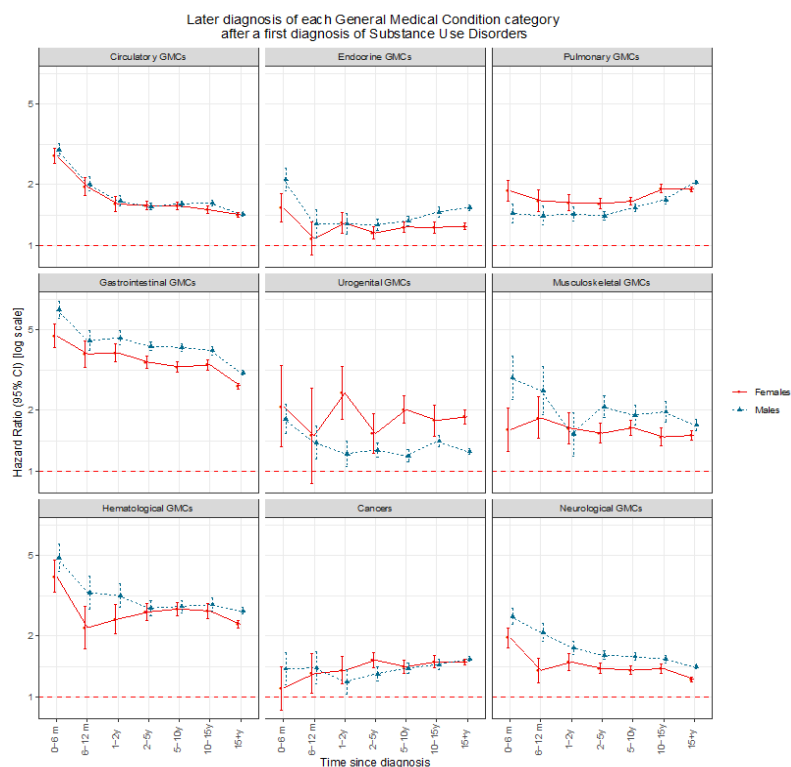

**Figure S35. Sex-specific HRs and 95% CIs of being diagnosed with each medical condition comparing those with and without a prior diagnosis of Schizophrenia, depending on time since first diagnosis**

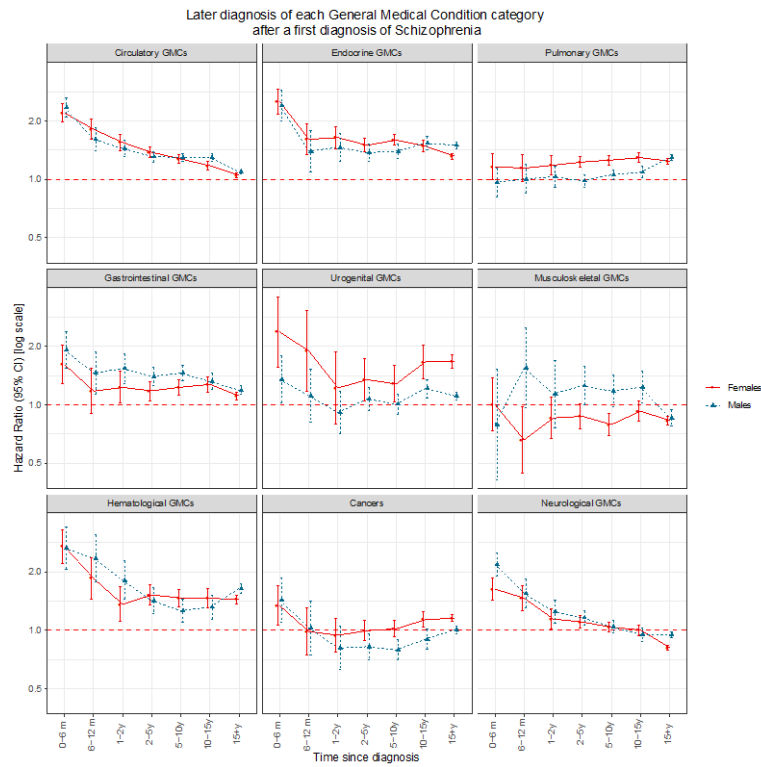

**Figure S36 Sex-specific HRs and 95% CIs of being diagnosed with each medical condition comparing those with and without a prior diagnosis of Mood Disorders, depending on time since first diagnosis**

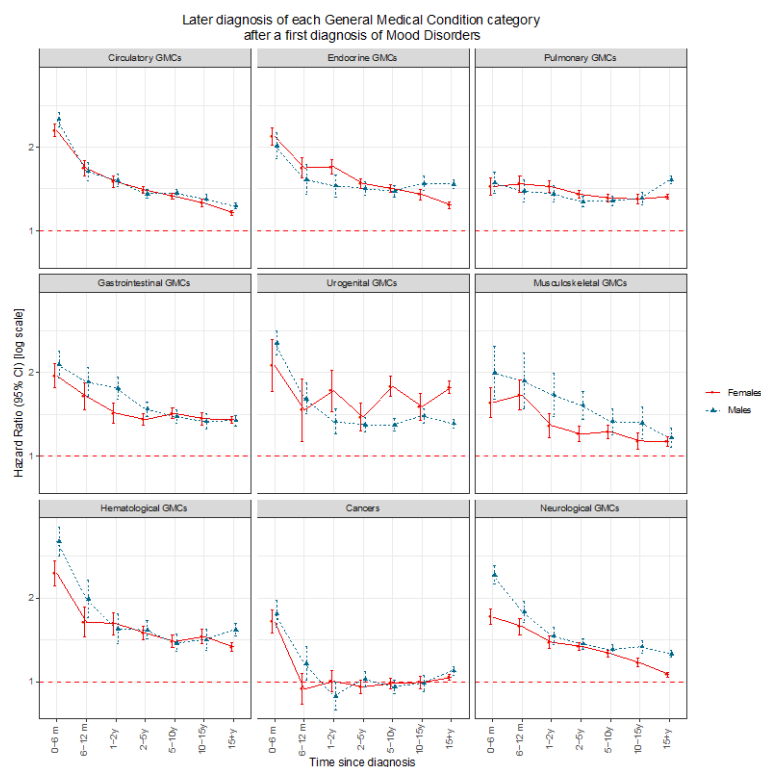

**Figure S37. Sex-specific HRs and 95% CIs of being diagnosed with each medical condition comparing those with and without a prior diagnosis of Neurotic Disorders, depending on time since first diagnosis**

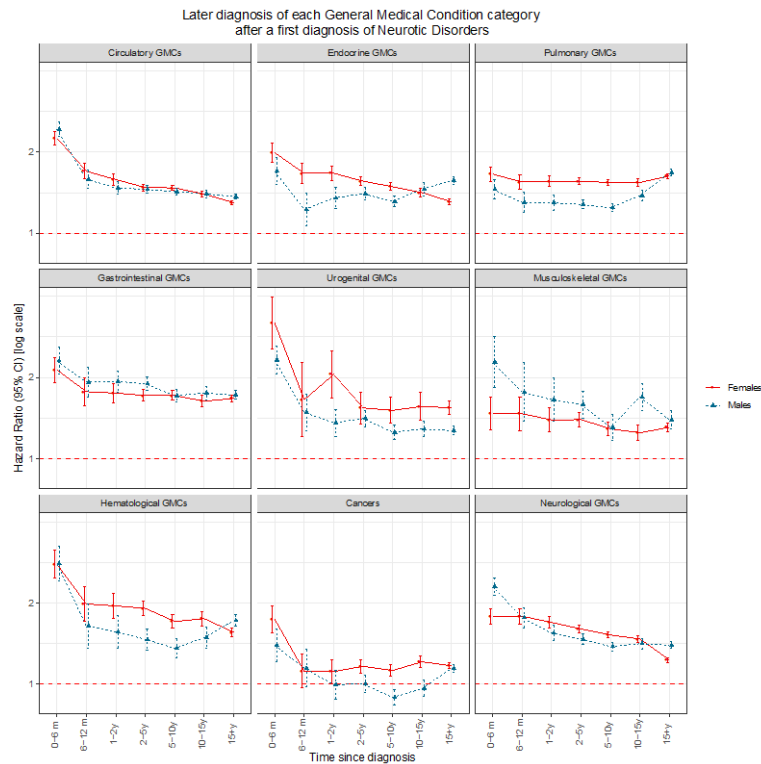

**Figure S38. Sex-specific HRs and 95% CIs of being diagnosed with each medical condition comparing those with and without a prior diagnosis of Eating Disorders, depending on time since first diagnosis**

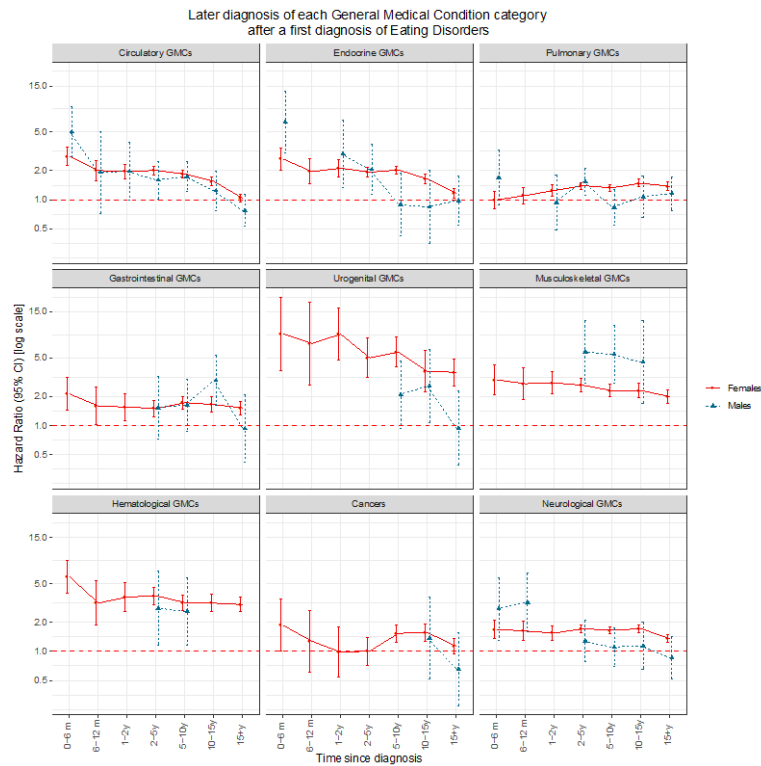

**Figure S39. Sex-specific HRs and 95% CIs of being diagnosed with each medical condition comparing those with and without a prior diagnosis of Personality Disorders, depending on time since first diagnosis**

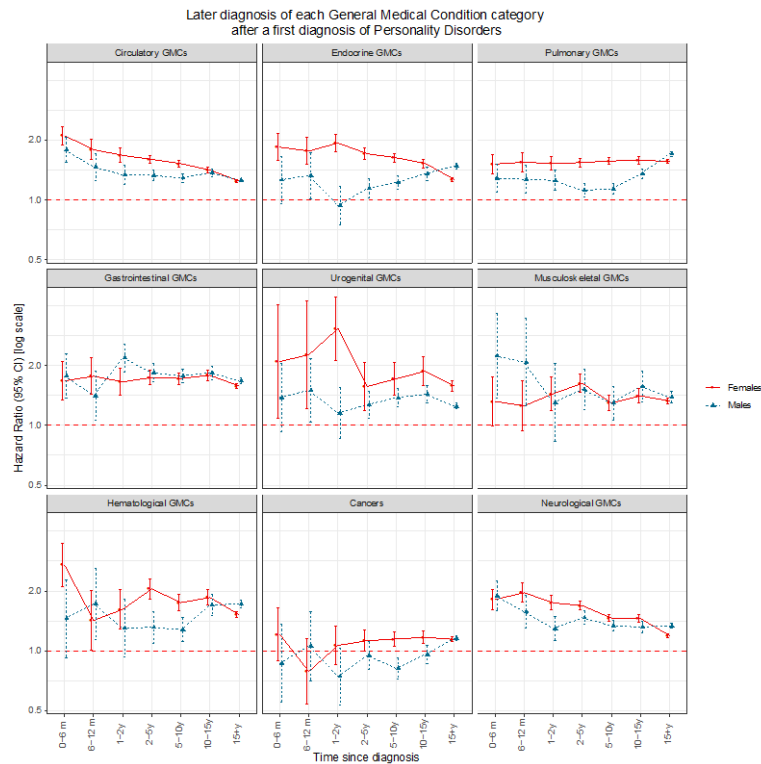

**Figure S40. Sex-specific HRs and 95% CIs of being diagnosed with each medical condition comparing those with and without a prior diagnosis of Intellectual Disabilities, depending on time since first diagnosis**

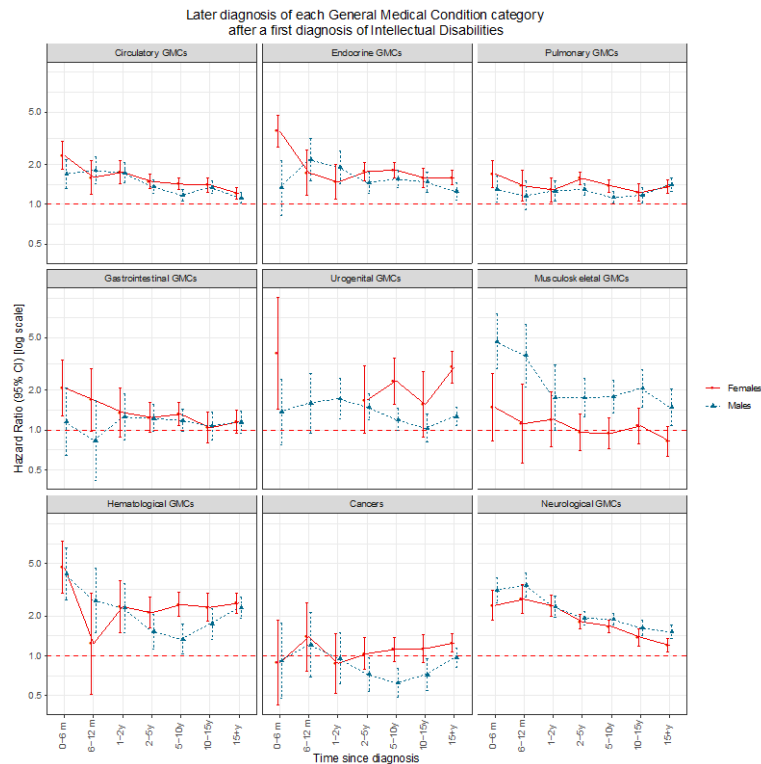



**Figure S41. Sex-specific HRs and 95% CIs of being diagnosed with each medical condition comparing those with and without a prior diagnosis of Developmental Disorders, depending on time since first diagnosis**

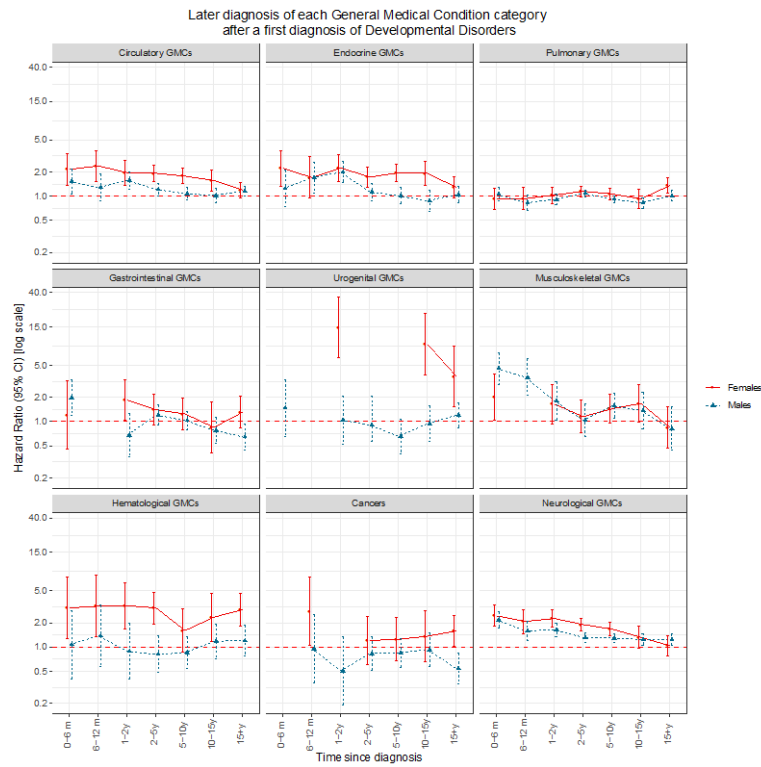

**Figure S42. Sex-specific HRs and 95% CIs of being diagnosed with each medical condition comparing those with and without a prior diagnosis of Behavioral Disorders, depending on time since first diagnosis**

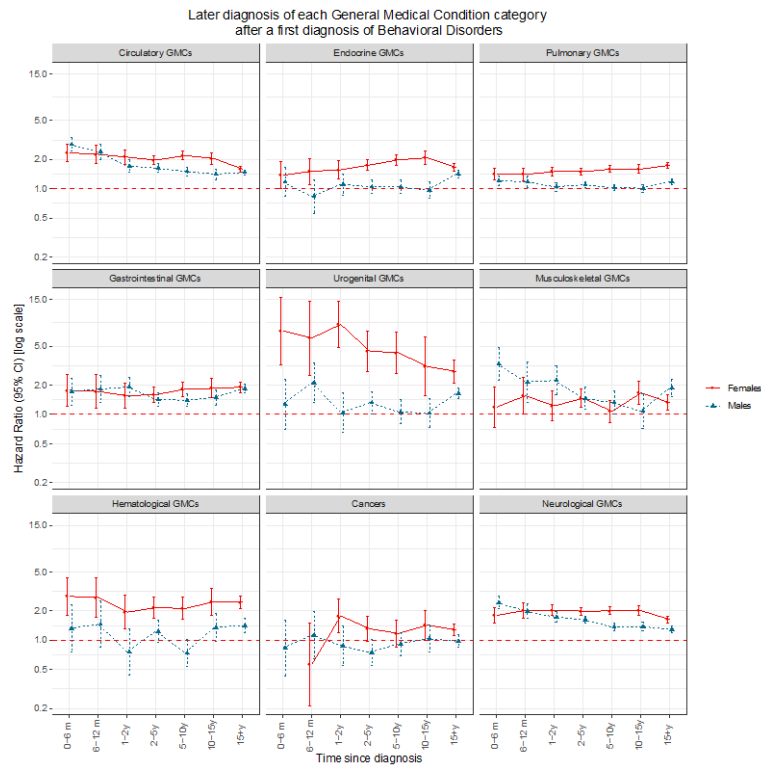

## Figures S43-S62. Lagged associations for specific general medical conditions

The following Figures show the hazard ratios (HRs) of receiving a diagnosis of a general medical condition, organized by categories, depending on whether individuals had been previously diagnosed with a mental disorder, and depending on time since the first diagnosis of this disorder. Estimates were obtained via Cox proportional hazards models with age as the underlying time scale. The reference category are persons without a diagnosis of the prior-disorder. The line of unity is shown as a red dashed line in each plot. Graphs of estimates are shown with variable (differing for each graphs) y-axes. Estimates with fewer than four exposed cases are not shown.

*Displaying estimates for Model A (green points; adjusting for sex and calendar time) and Model B (purple triangles; further adjustment for other mental disorders that had onset prior to the mental disorder of interest)*

*The y-axis varies for each graph, however they range from a minimum of 0.15 to a maximum of 41*

- S43. Organic Disorders
- S44. Substance Use Disorders
- S45. Schizophrenia
- S46. Mood Disorders
- S47. Neurotic Disorders
- S48. Eating Disorders
- S49. Personality Disorders
- S50. Intellectual Disorders
- S51. Developmental Disorders
- S52. Behavioral Disorders

*Displaying Model B estimates for males (blue triangles) and females (red points)*

*The y-axis varies for each graph, however they range from a minimum of 0.07 to a maximum of 43*

- S53. Organic Disorders
- S54. Substance Use Disorders
- S55. Schizophrenia
- S56. Mood Disorders
- S57. Neurotic Disorders
- S58. Eating Disorders
- S59. Personality Disorders
- S60. Intellectual Disorders
- S61. Developmental Disorders
- S62. Behavioral Disorders

**Figures S43.1-S43.9. HRs and 95% CIs of being diagnosed with each medical condition comparing those with and without a prior diagnosis of Organic Disorders, depending on time since first diagnosis**

Figure S43.1 - Circulatory Conditions

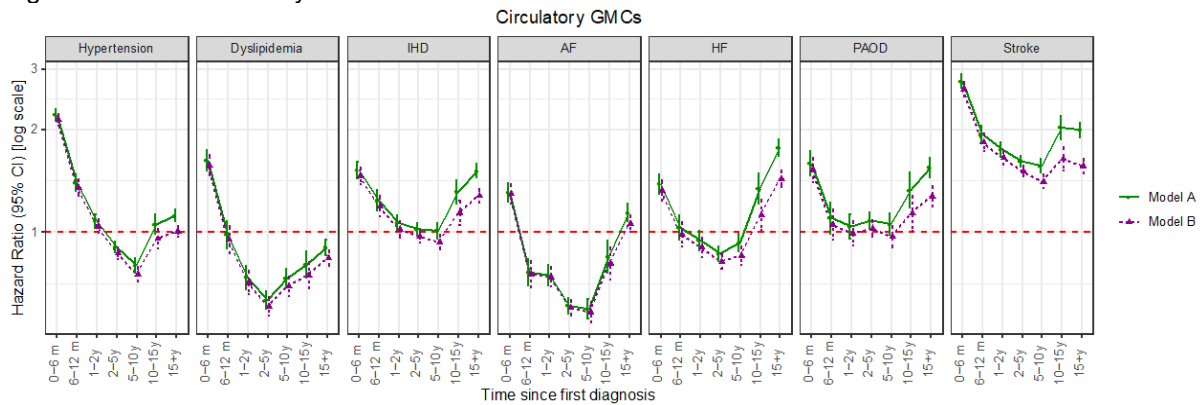

Figure S43.2 - Endocrine Conditions

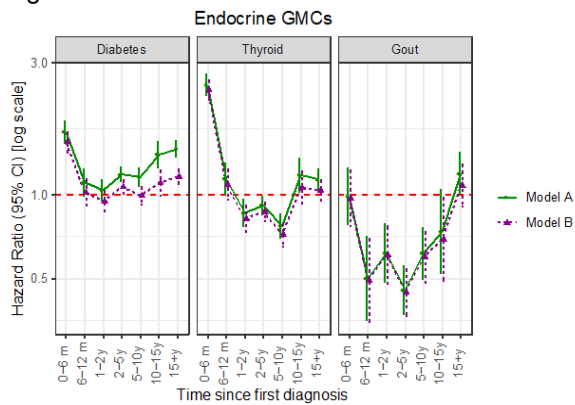

Figure S43.3 - Pulmonary Conditions

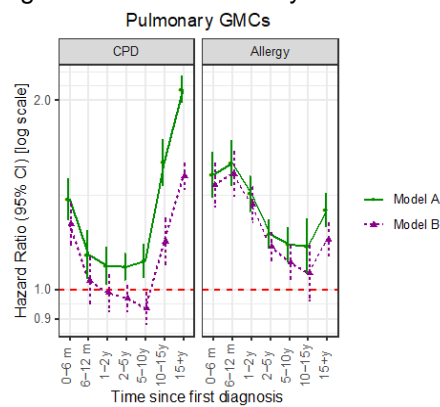

Figure S43.4 - Gastrointestinal Conditions

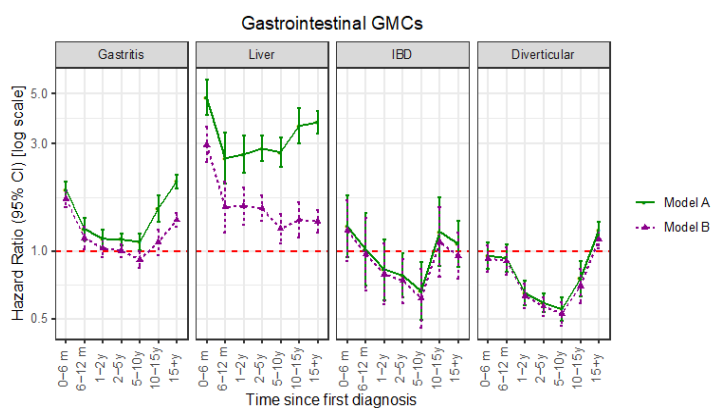

Figure S43.5 - Urogenital Conditions

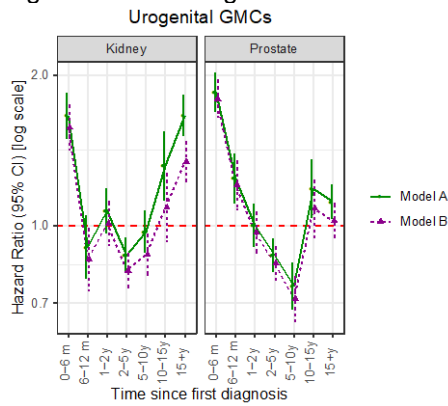

Figure S43.6 - Musculoskeletal Conditions

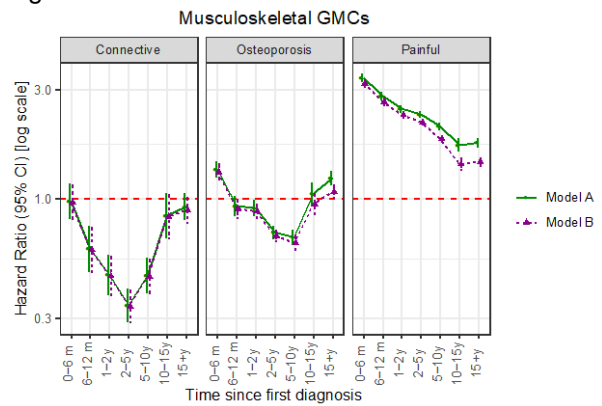

Figure S43.7 - Hematological Conditions

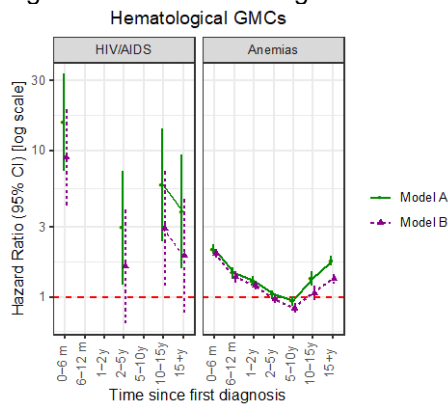

Figure S43.8 - Cancer

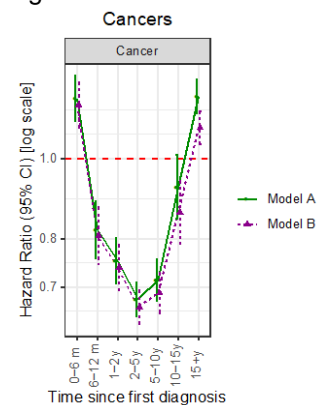

Figure S43.9 - Neurological Conditions

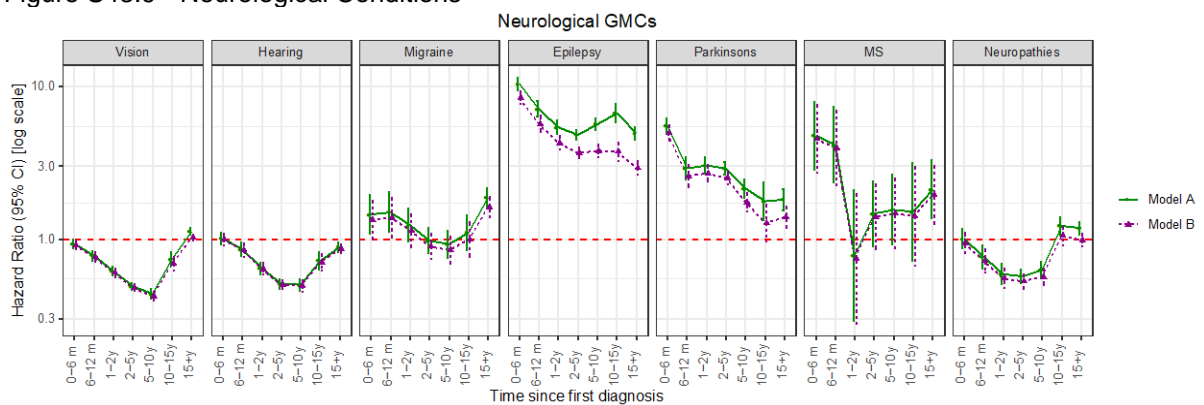

**Figures S44.1-S44.9. HRs and 95% CIs of being diagnosed with each medical condition comparing those with and without a prior diagnosis of Substance Use Disorders, depending on time since first diagnosis**

Figure S44.1 - Circulatory Conditions

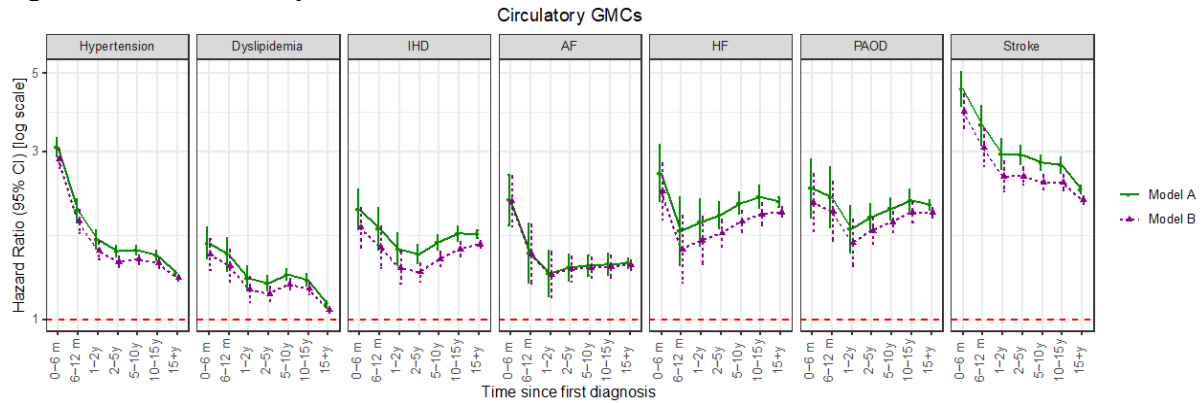

Figure S44.2 - Endocrine Conditions

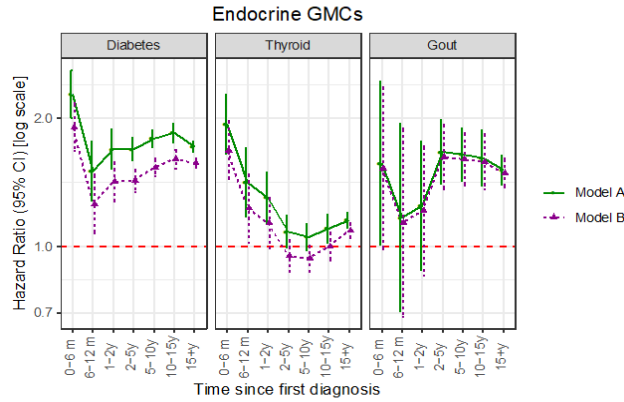

Figure S44.3 - Pulmonary Conditions

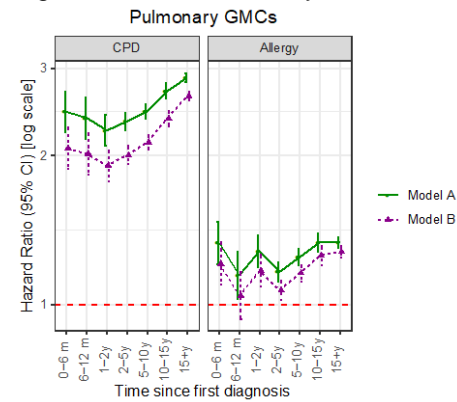

Figure S44.4 - Gastrointestinal Conditions

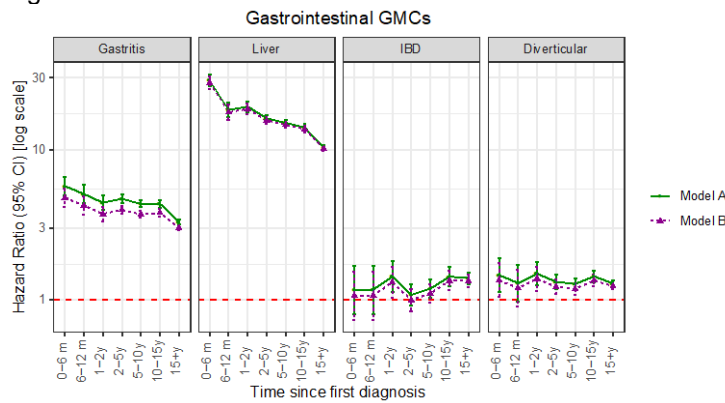

Figure S44.5 - Urogenital Conditions  
Urogenital GMCs

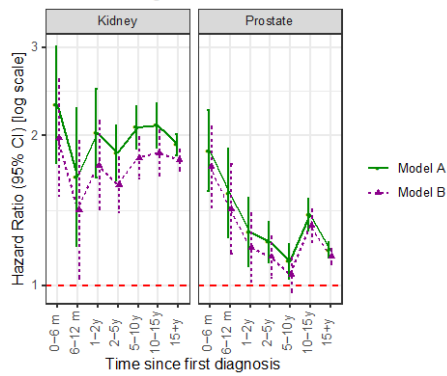

Figure S44.6 - Musculoskeletal Conditions  
Musculoskeletal GMCs

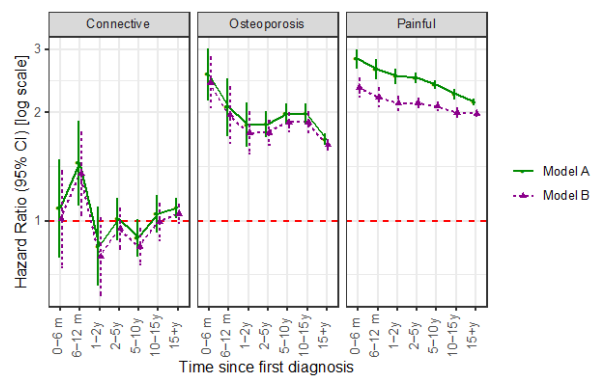

Figure S44.7 - Hematological Conditions  
Hematological GMCs

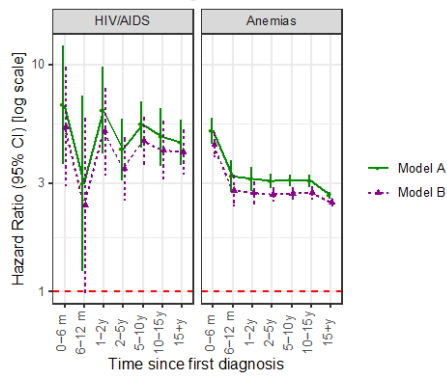

Figure S44.8 - Cancer  
Cancers

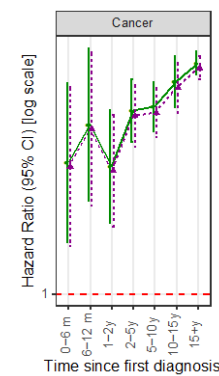

Figure S44.9 - Neurological Conditions  
Neurological GMCs

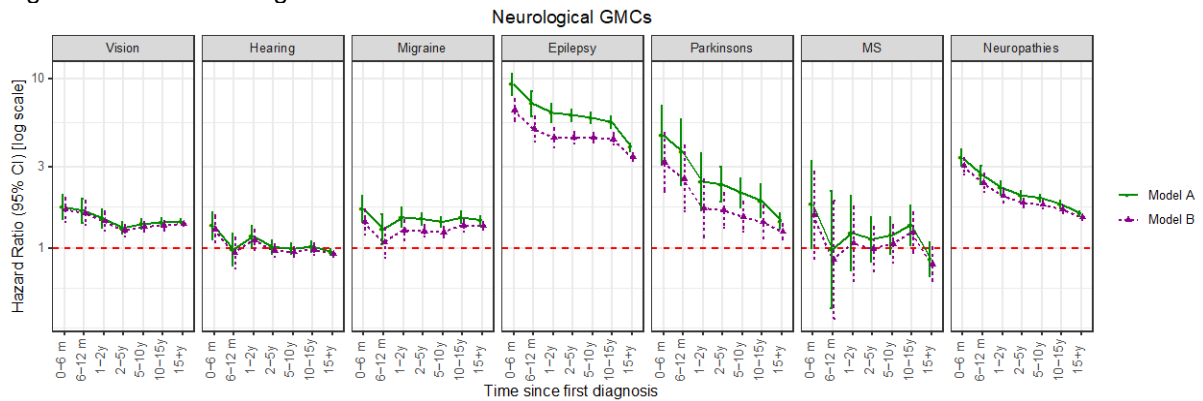

**Figures S45.1-S45.9. HRs and 95% CIs of being diagnosed with each medical condition comparing those with and without a prior diagnosis of Schizophrenia, depending on time since first diagnosis**

Figure S45.1 - Circulatory Conditions

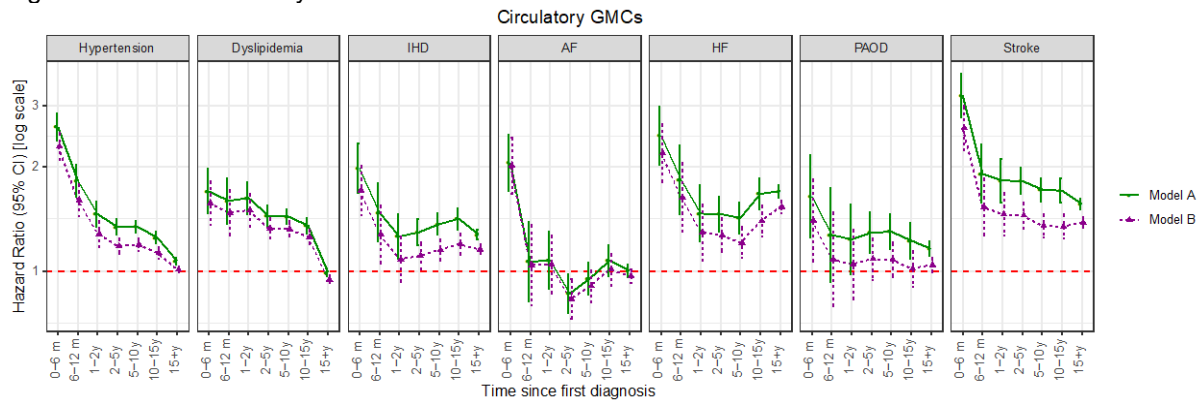

Figure S45.2 - Endocrine Conditions

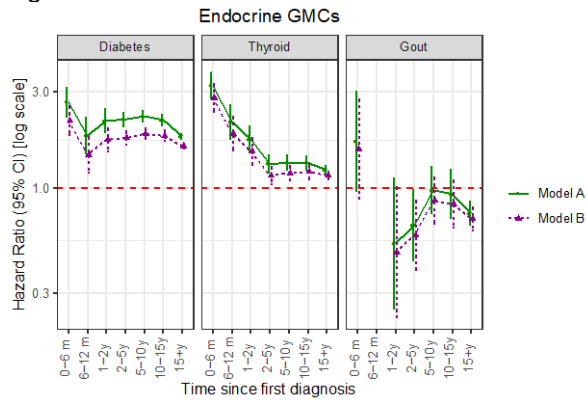

Figure S45.3 - Pulmonary Conditions

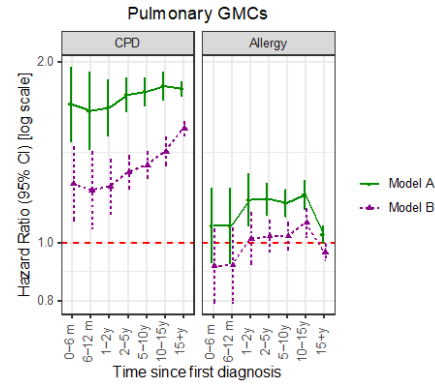

Figure S45.4 - Gastrointestinal Conditions

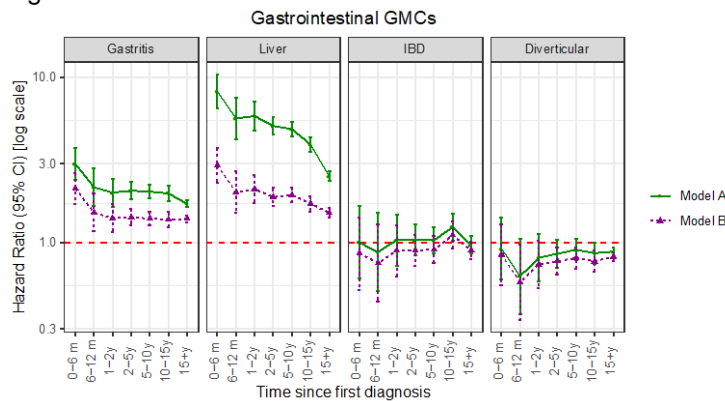

Figure S45.5 - Urogenital Conditions  
Urogenital GMCs

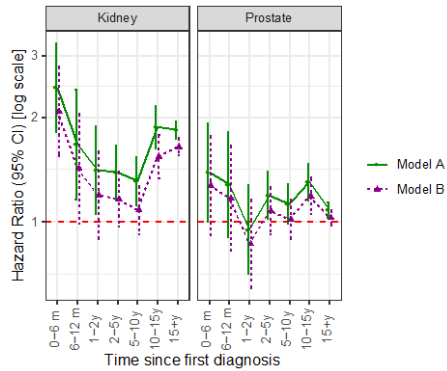

Figure S45.6 - Musculoskeletal Conditions  
Musculoskeletal GMCs

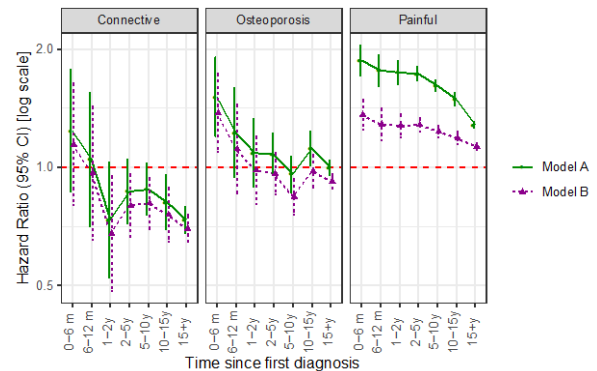

Figure S45.7 - Hematological Conditions  
Hematological GMCs

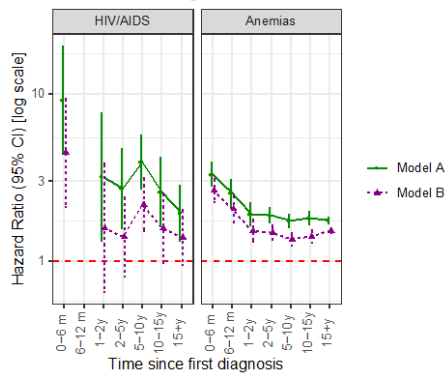

Figure S45.8 - Cancer  
Cancers

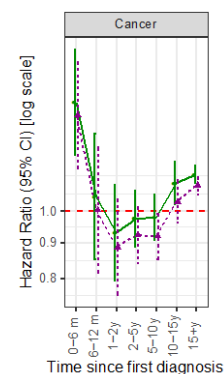

Figure S45.9 - Neurological Conditions  
Neurological GMCs

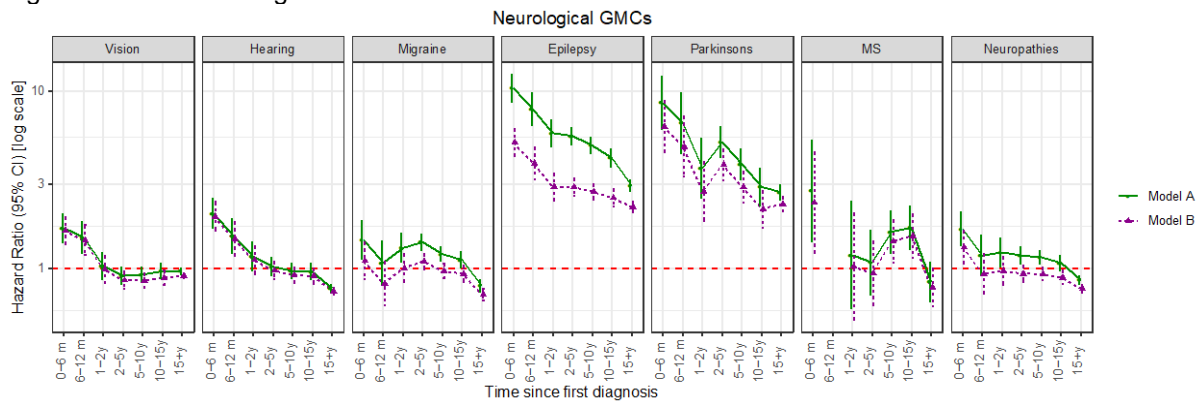



**Figures S46.1-S46.9. HRs and 95% CIs of being diagnosed with each medical condition comparing those with and without a prior diagnosis of Mood Disorders, depending on time since first diagnosis**

Figure S46.1 - Circulatory Conditions

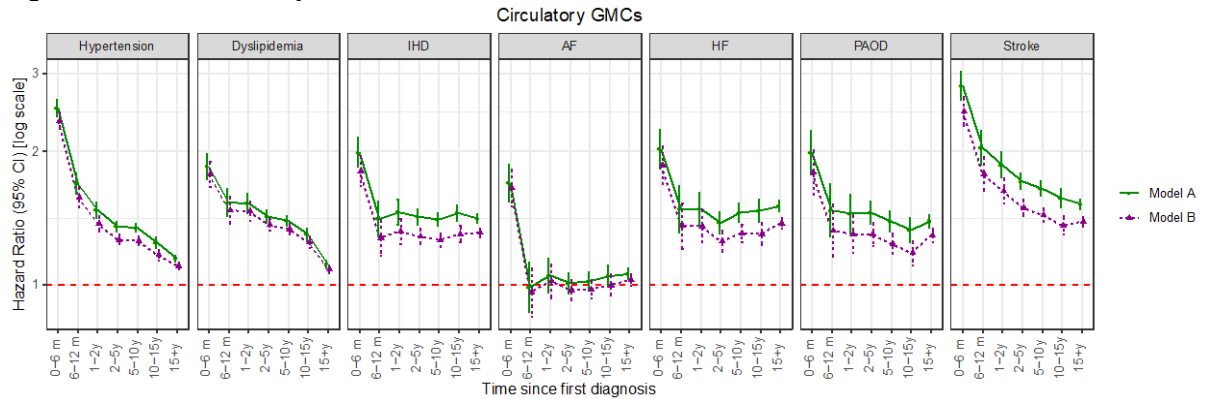

Figure S46.2 - Endocrine Conditions

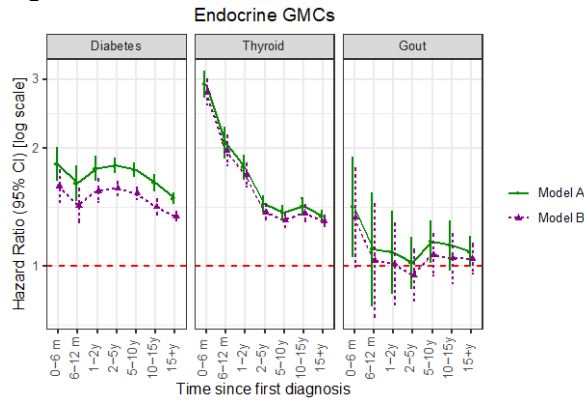

Figure S46.3 - Pulmonary Conditions

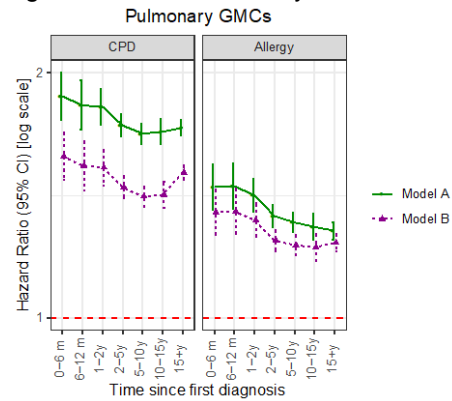

Figure S46.4 - Gastrointestinal Conditions

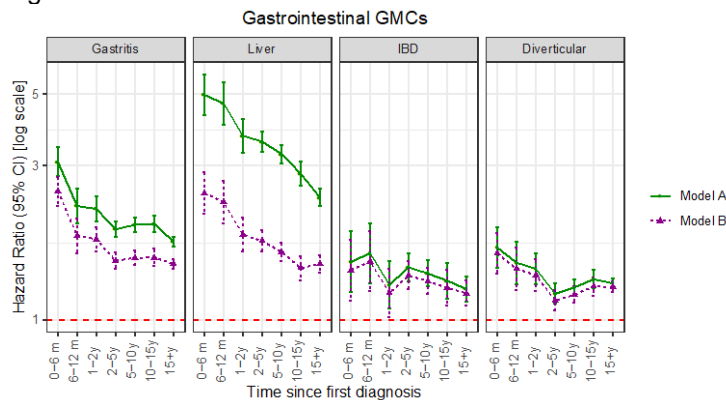

Figure S46.5 - Urogenital Conditions

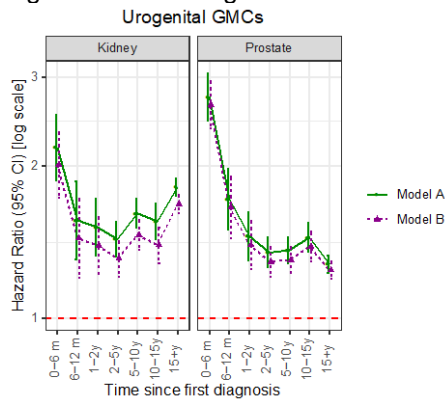

Figure S46.6 - Musculoskeletal Conditions

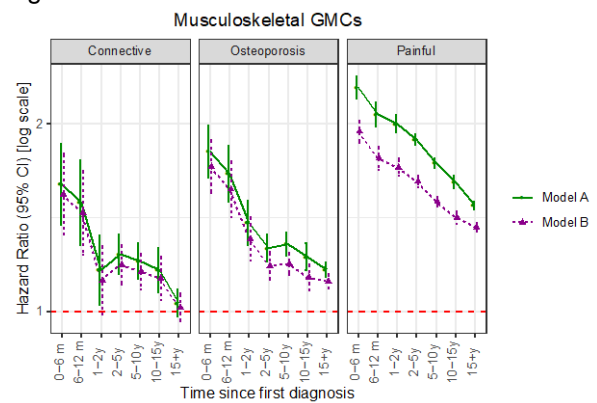

Figure S46.7 - Hematological Conditions

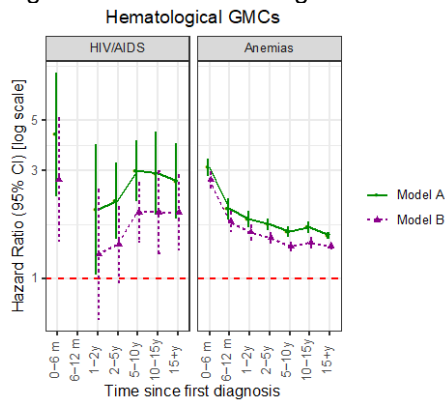

Figure S46.8 - Cancer

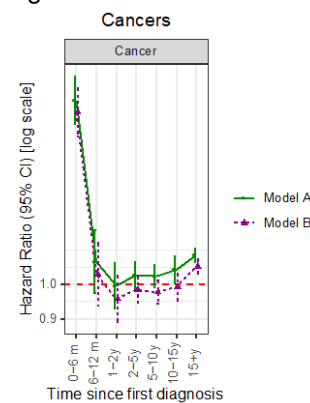

Figure S46.9 - Neurological Conditions

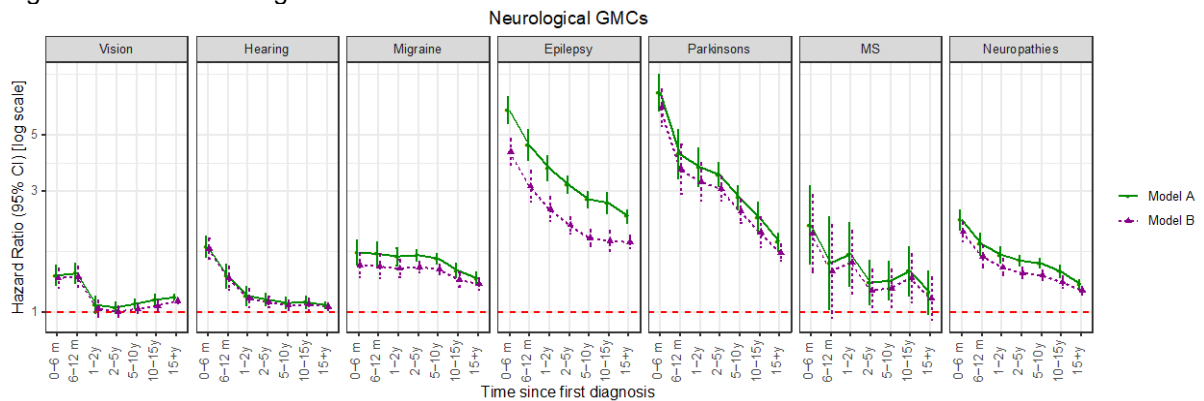

**Figures S47.1-S47.9. HRs and 95% CIs of being diagnosed with each medical condition comparing those with and without a prior diagnosis of Neurotic Disorders, depending on time since first diagnosis**

Figure S47.1 - Circulatory Conditions

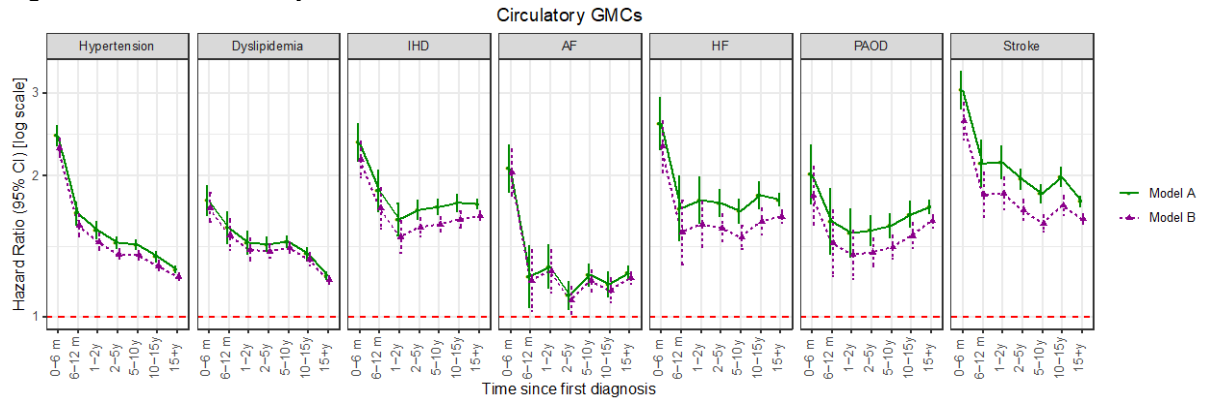

Figure S47.2 - Endocrine Conditions

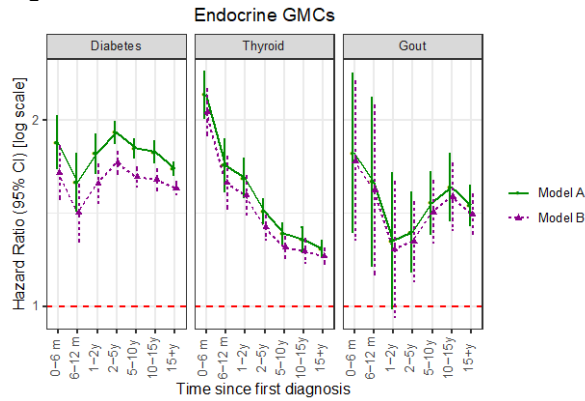

Figure S47.3 - Pulmonary Conditions

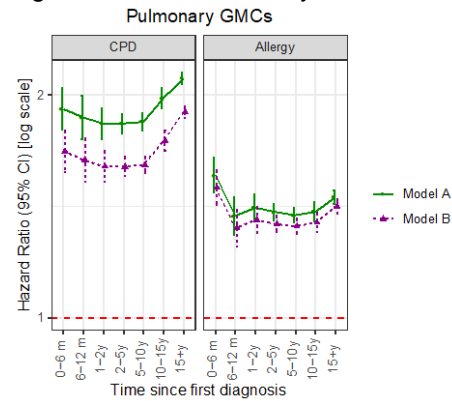

Figure S47.4 - Gastrointestinal Conditions

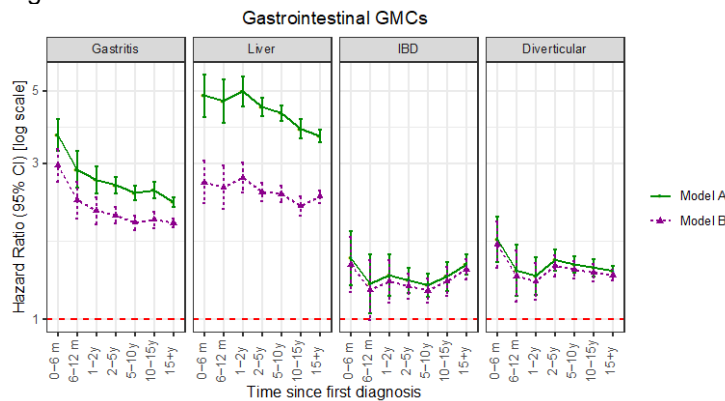

Figure S47.5 - Urogenital Conditions  
Urogenital GMCs

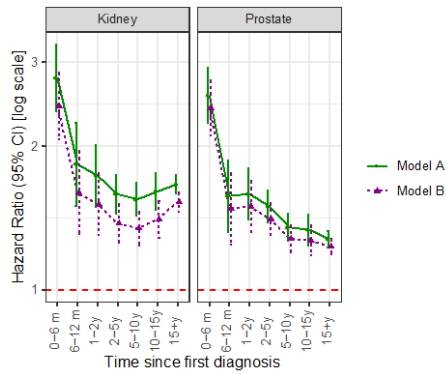

Figure S47.6 - Musculoskeletal Conditions  
Musculoskeletal GMCs

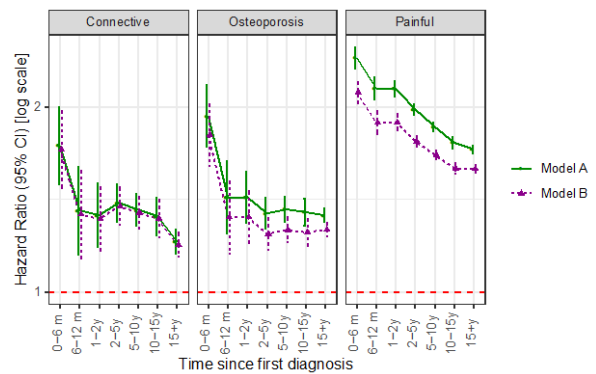

Figure S47.7 - Hematological Conditions  
Hematological GMCs

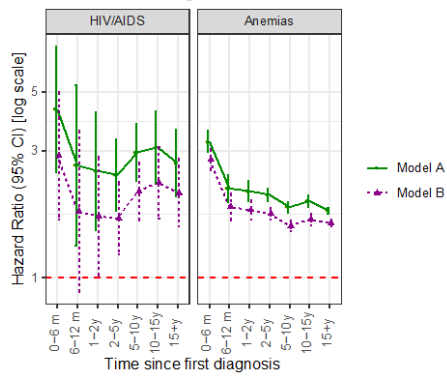

Figure S47.8 - Cancer  
Cancers

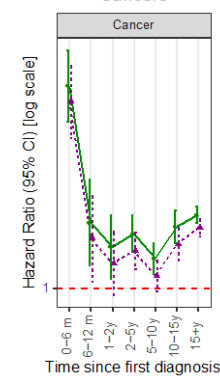

Figure S47.9 - Neurological Conditions  
Neurological GMCs

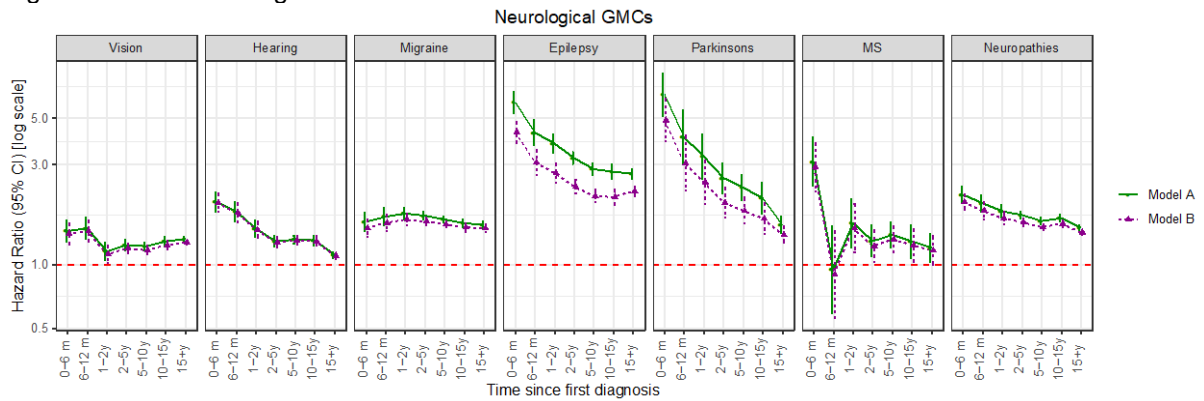

**Figures S48.1-S48.9. HRs and 95% CIs of being diagnosed with each medical condition comparing those with and without a prior diagnosis of Eating Disorders, depending on time since first diagnosis**

Figure S48.1 - Circulatory Conditions

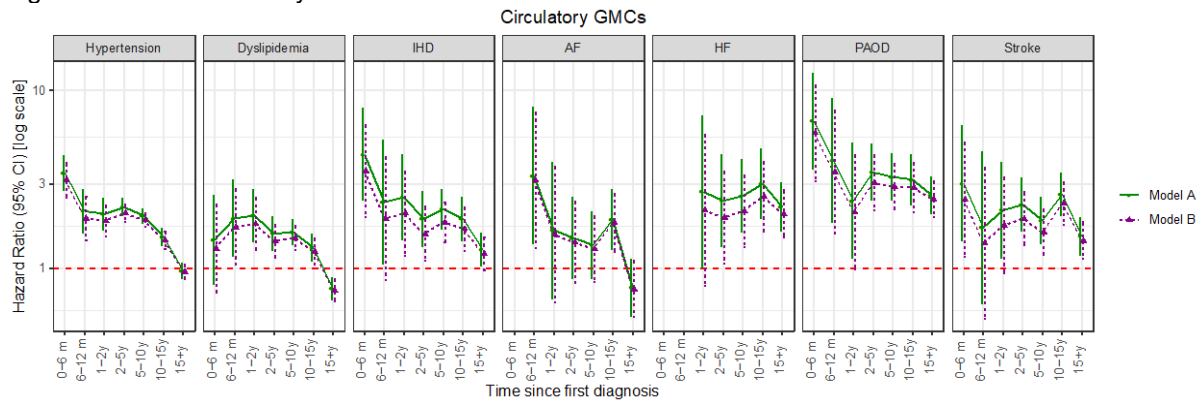

Figure S48.2 - Endocrine Conditions

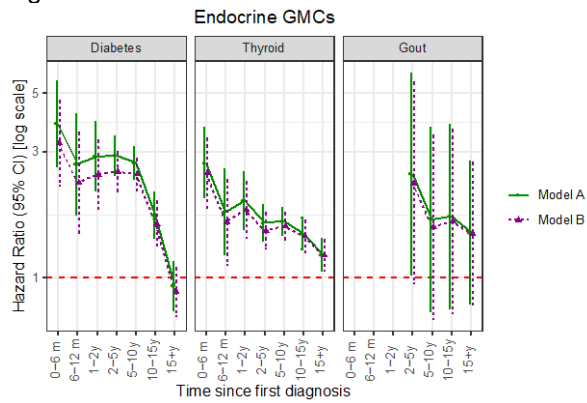

Figure S48.3 - Pulmonary Conditions

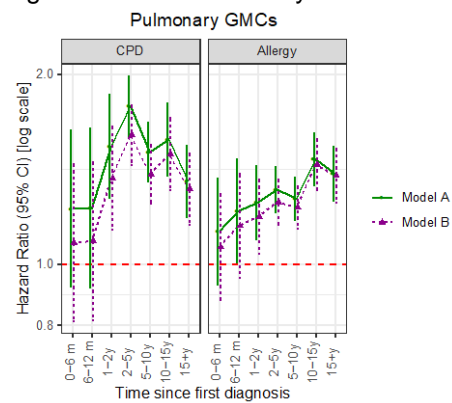

Figure S48.4 - Gastrointestinal Conditions

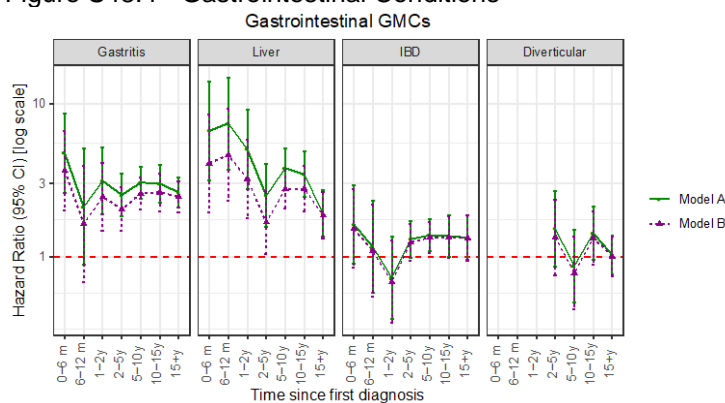

Figure S48.5 - Urogenital Conditions  
Urogenital GMCs

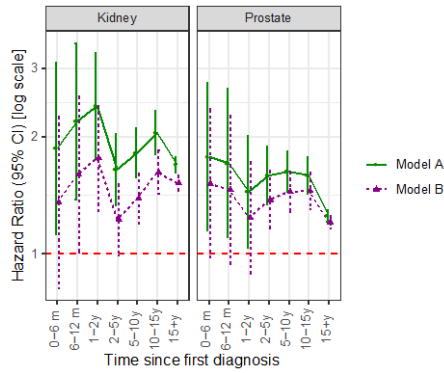

Figure S48.6 - Musculoskeletal Conditions  
Musculoskeletal GMCs

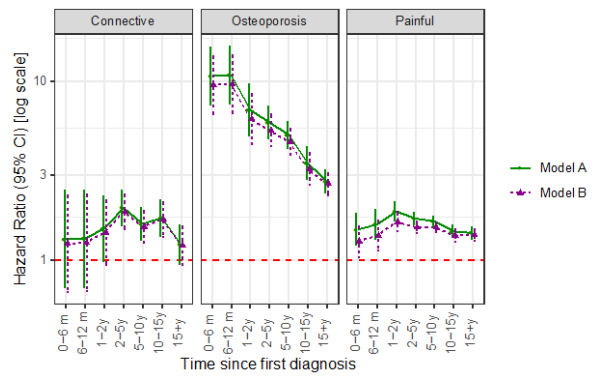

Figure S48.7 - Hematological Conditions  
Hematological GMCs

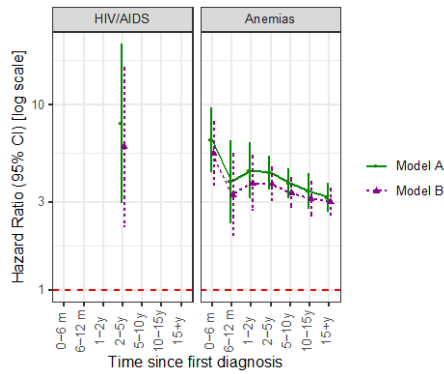

Figure S48.8 - Cancer  
Cancers

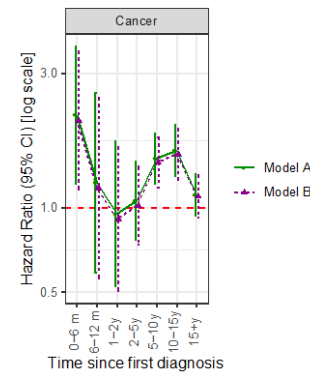

Figure S48.9 - Neurological Conditions  
Neurological GMCs

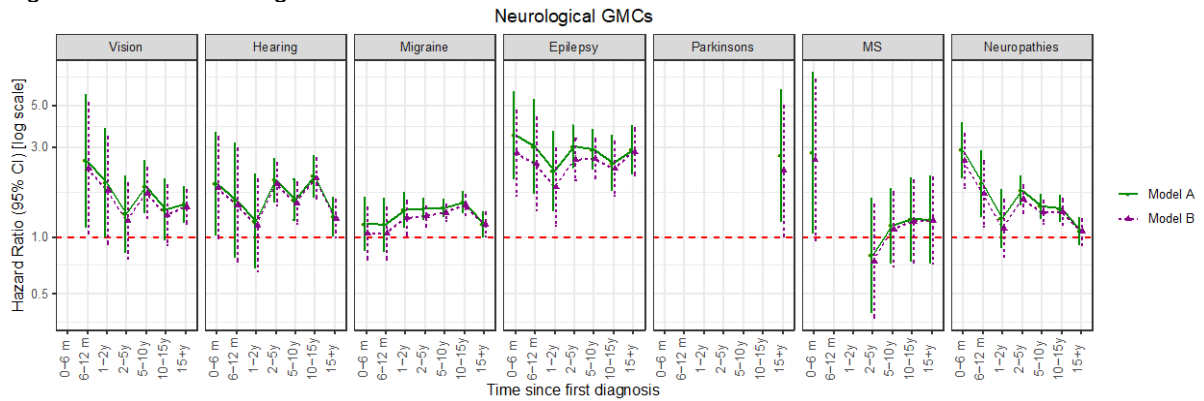

**Figures S49.1-S49.9. HRs and 95% CIs of being diagnosed with each medical condition comparing those with and without a prior diagnosis of Personality Disorders, depending on time since first diagnosis**

Figure S49.1 - Circulatory Conditions

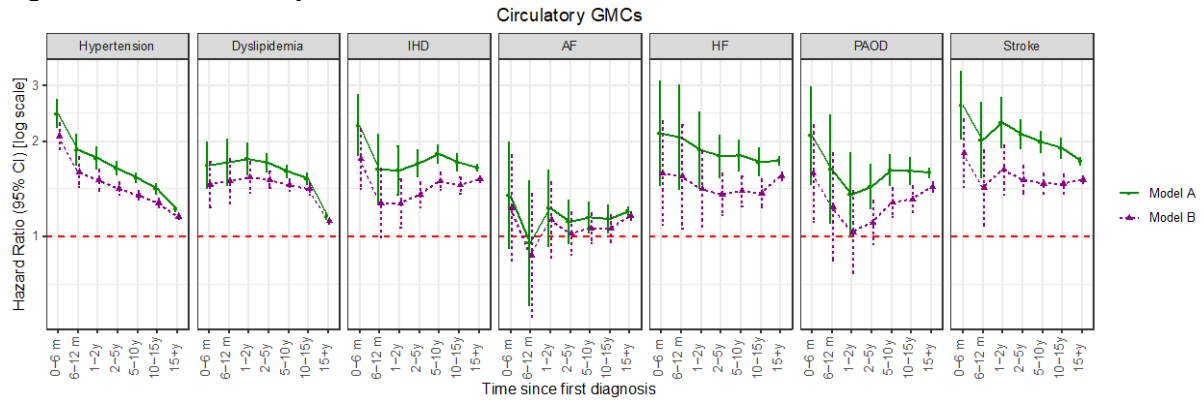

Figure S49.2 - Endocrine Conditions

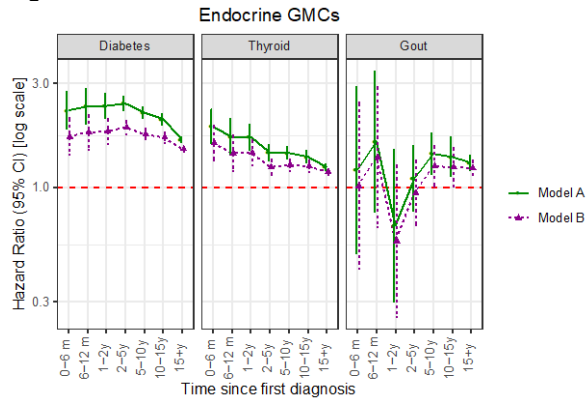

Figure S49.3 - Pulmonary Conditions

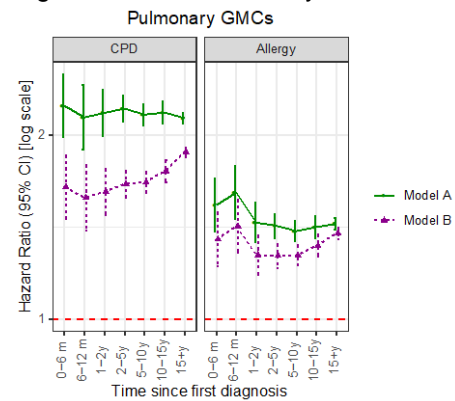

Figure S49.4 - Gastrointestinal Conditions

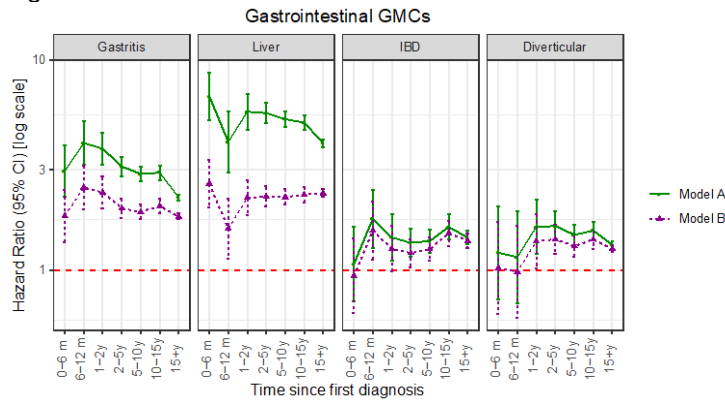

Figure S49.5 - Urogenital Conditions  
Urogenital GMCs

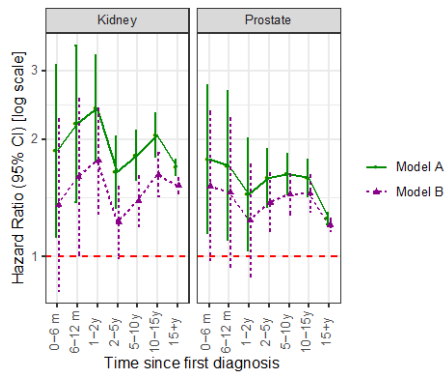

Figure S49.6 - Musculoskeletal Conditions  
Musculoskeletal GMCs

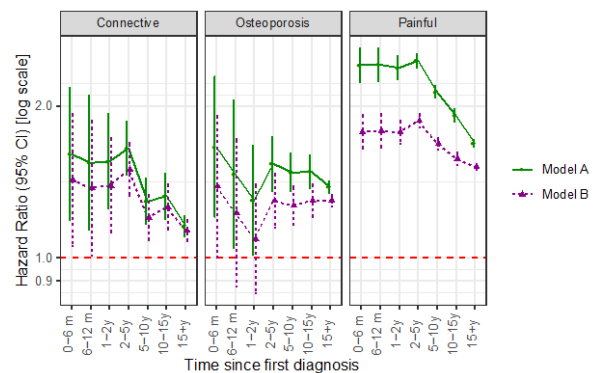

Figure S49.7 - Hematological Conditions  
Hematological GMCs

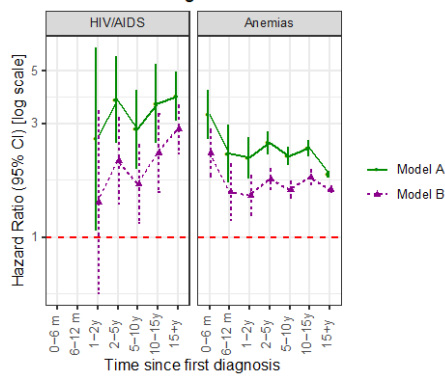

Figure S49.8 - Cancer  
Cancers

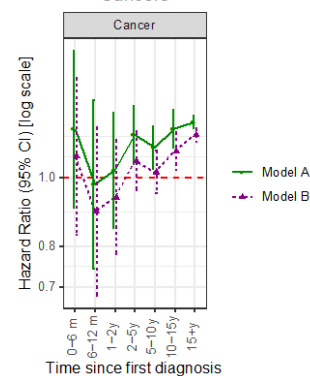

Figure S49.9 - Neurological Conditions  
Neurological GMCs

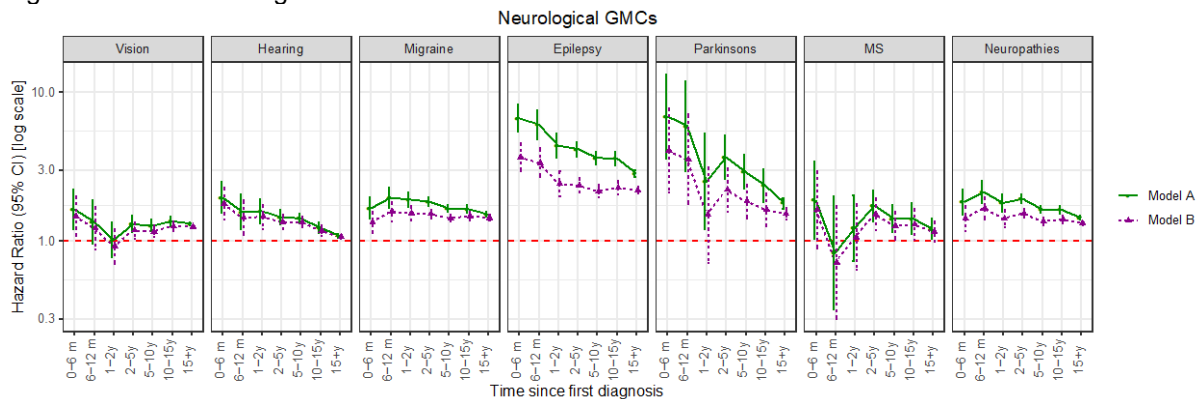



**Figures S50.1-S50.9. HRs and 95% CIs of being diagnosed with each medical condition comparing those with and without a prior diagnosis of Intellectual Disabilities, depending on time since first diagnosis**

Figure S50.1 - Circulatory Conditions

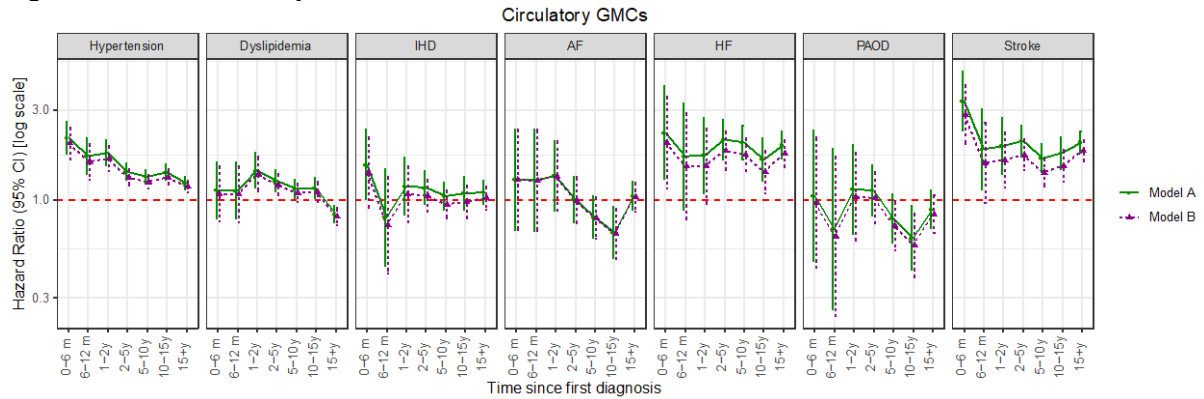

Figure S50.2 - Endocrine Conditions

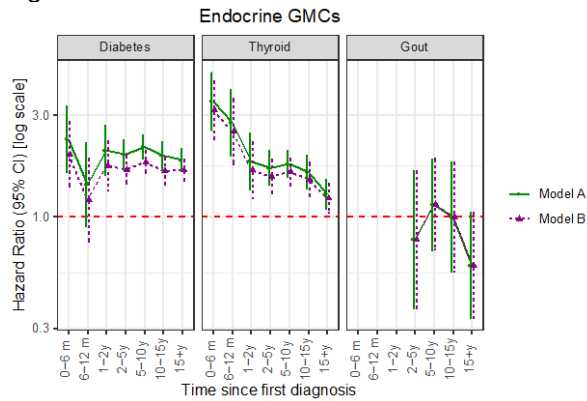

Figure S50.3 - Pulmonary Conditions

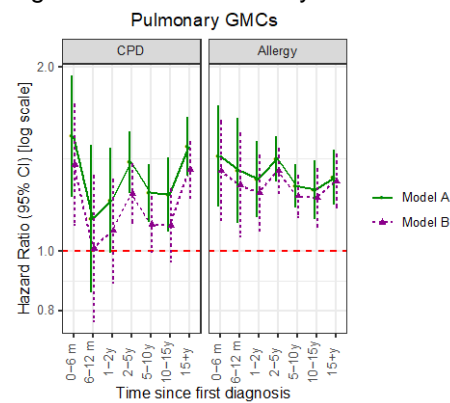

Figure S50.4 - Gastrointestinal Conditions

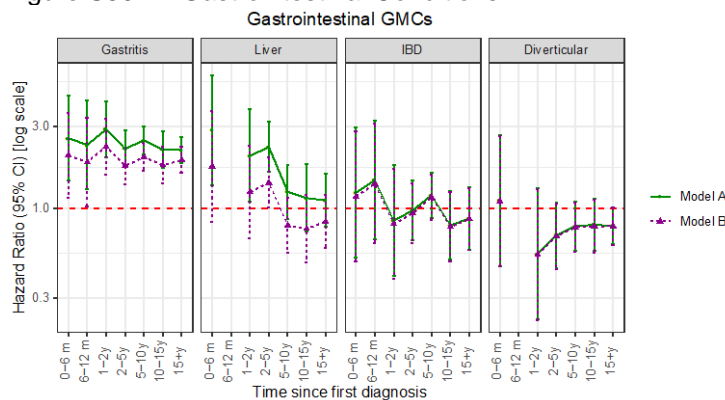

Figure S50.5 - Urogenital Conditions

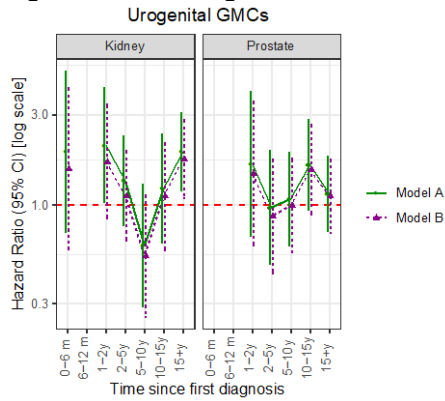

Figure S50.6 - Musculoskeletal Conditions

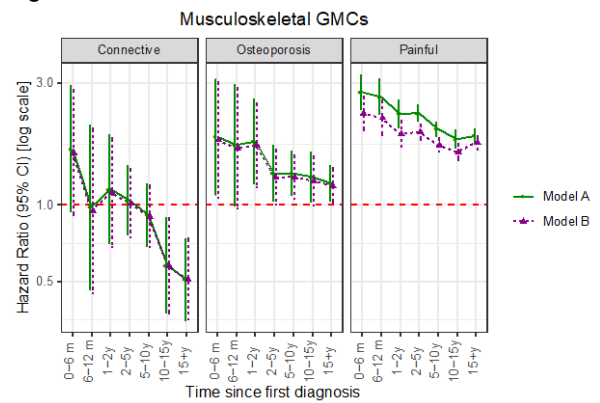

Figure S50.7 - Hematological Conditions

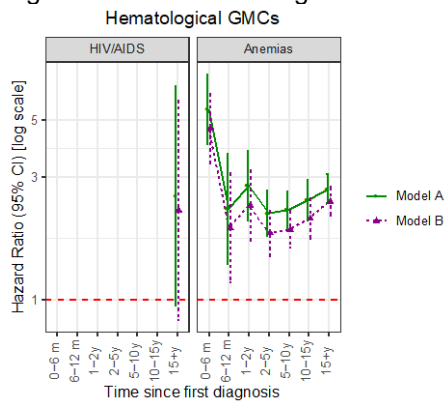

Figure S50.8 - Cancer

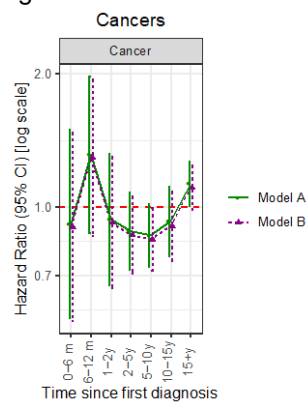

Figure S50.9 - Neurological Conditions

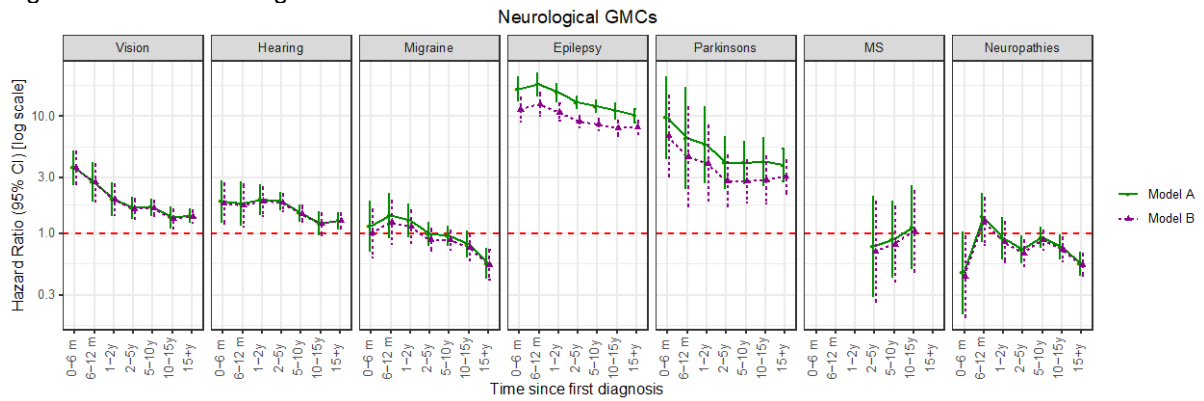

**Figures S51.1-S51.9. HRs and 95% CIs of being diagnosed with each medical condition comparing those with and without a prior diagnosis of Developmental Disorders, depending on time since first diagnosis**

Figure S51.1 - Circulatory Conditions

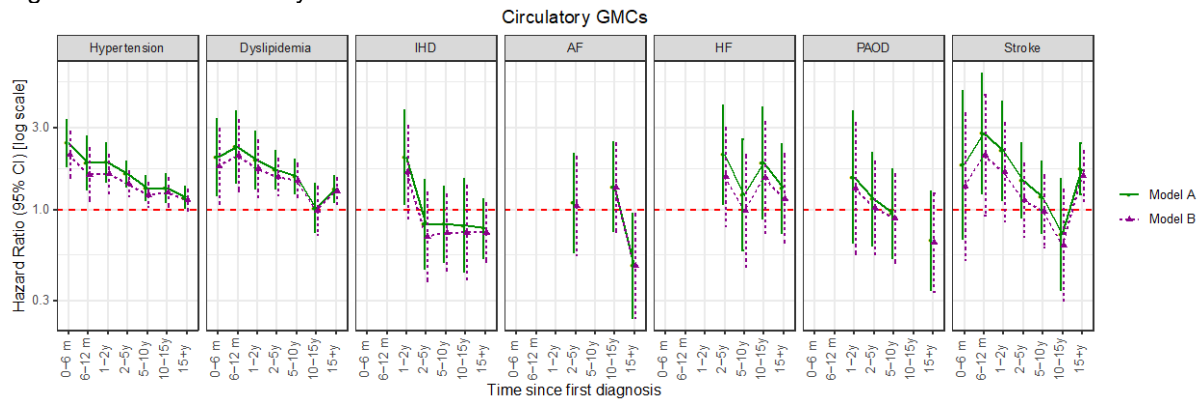

Figure S51.2 - Endocrine Conditions

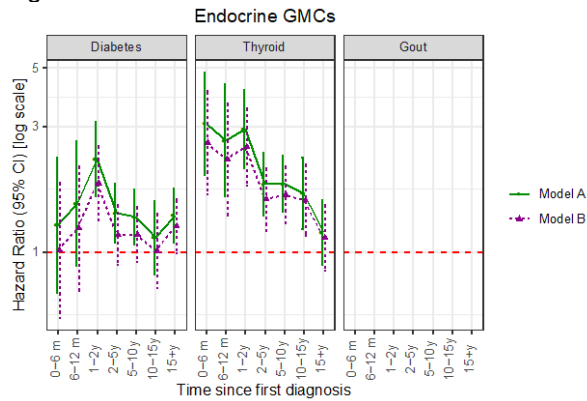

Figure S51.3 - Pulmonary Conditions

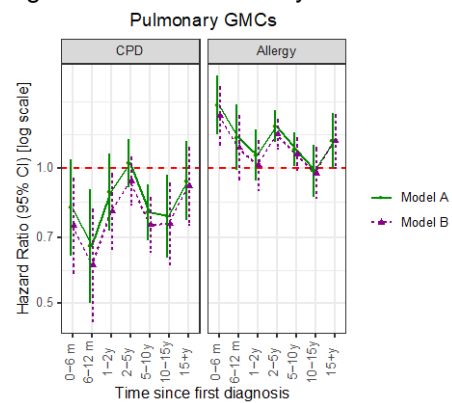

Figure S51.4 - Gastrointestinal Conditions

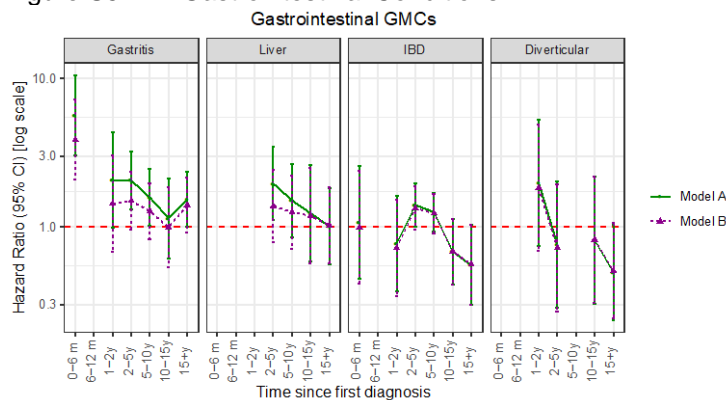

Figure S51.5 - Urogenital Conditions



Figure S51.6 - Musculoskeletal Conditions

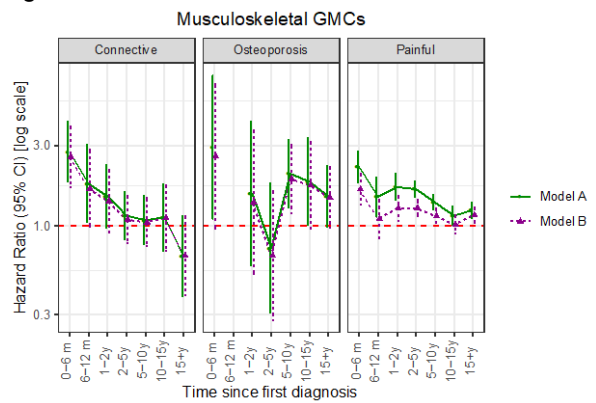

Figure S51.7 - Hematological Conditions

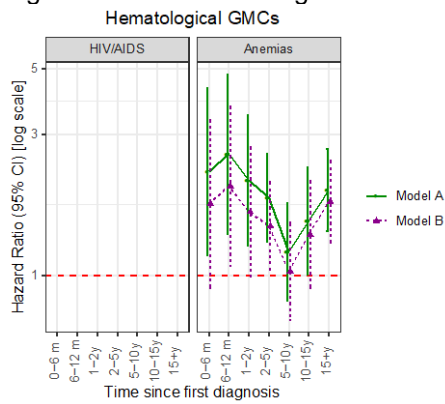

Figure S51.8 - Cancer

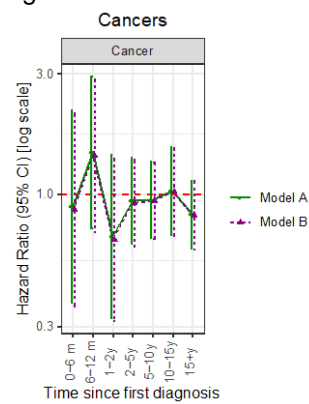

Figure S51.9 - Neurological Conditions

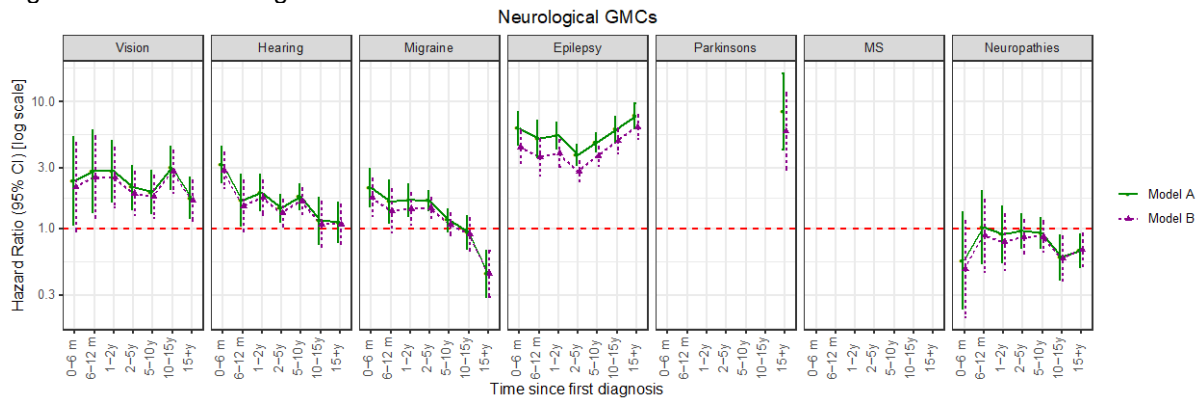

**Figures S52.1-S52.9. HRs and 95% CIs of being diagnosed with each medical condition comparing those with and without a prior diagnosis of Behavioral Disorders, depending on time since first diagnosis**

Figure S52.1 - Circulatory Conditions

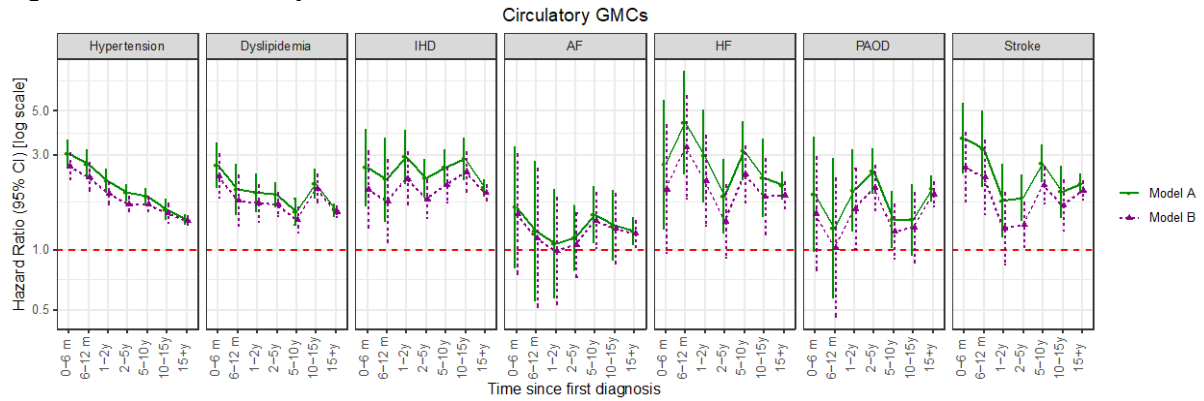

Figure S52.2 - Endocrine Conditions

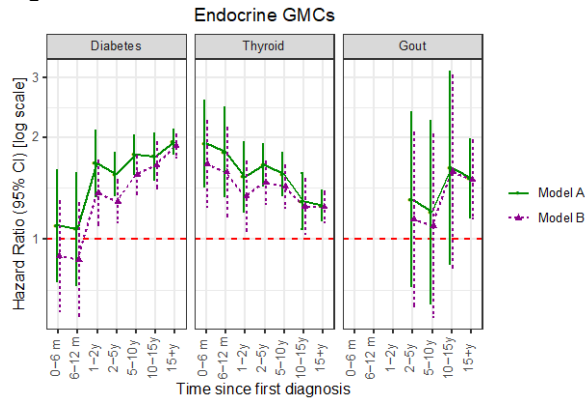

Figure S52.3 - Pulmonary Conditions

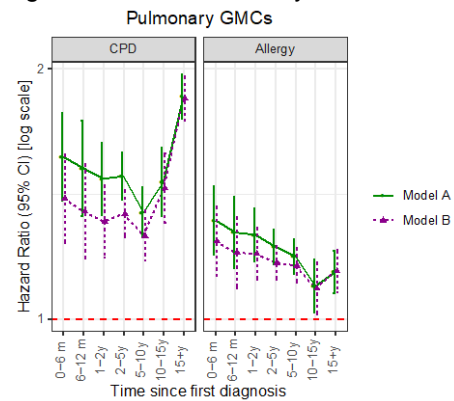

Figure S52.4 - Gastrointestinal Conditions

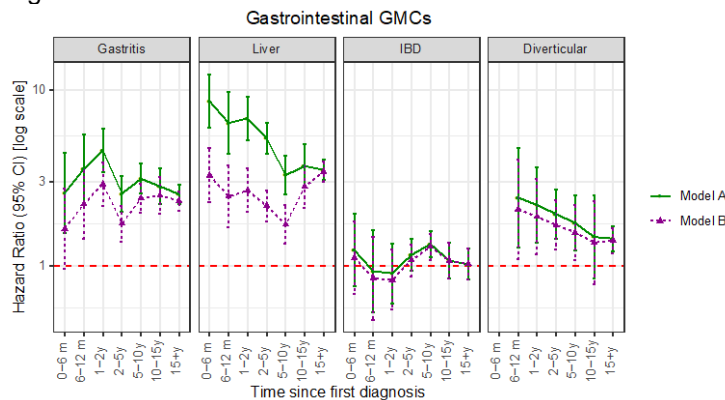

Figure S52.5 - Urogenital Conditions

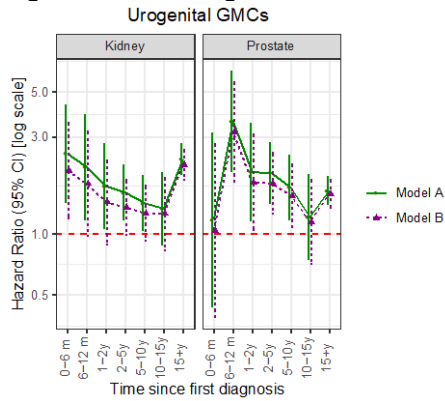

Figure S52.6 - Musculoskeletal Conditions

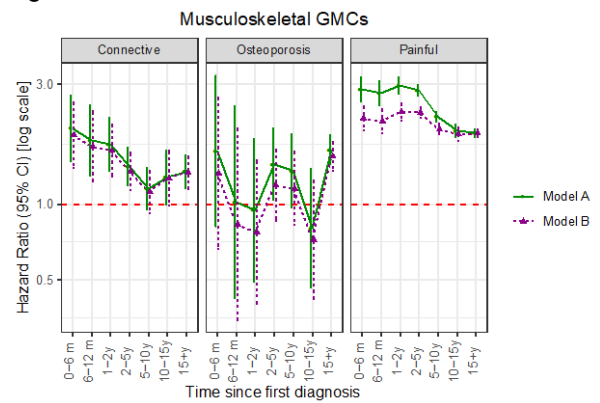

Figure S52.7 - Hematological Conditions

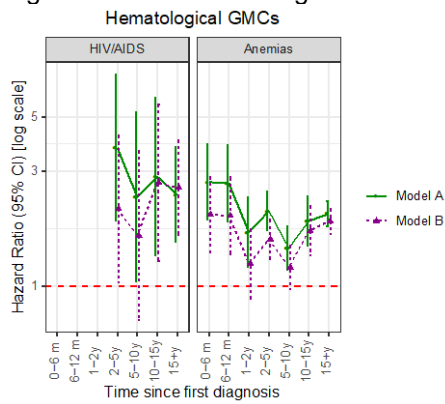

Figure S52.8 - Cancer

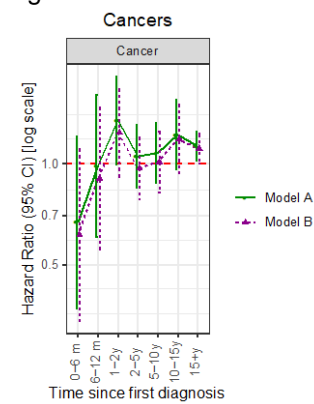

Figure S52.9 - Neurological Conditions

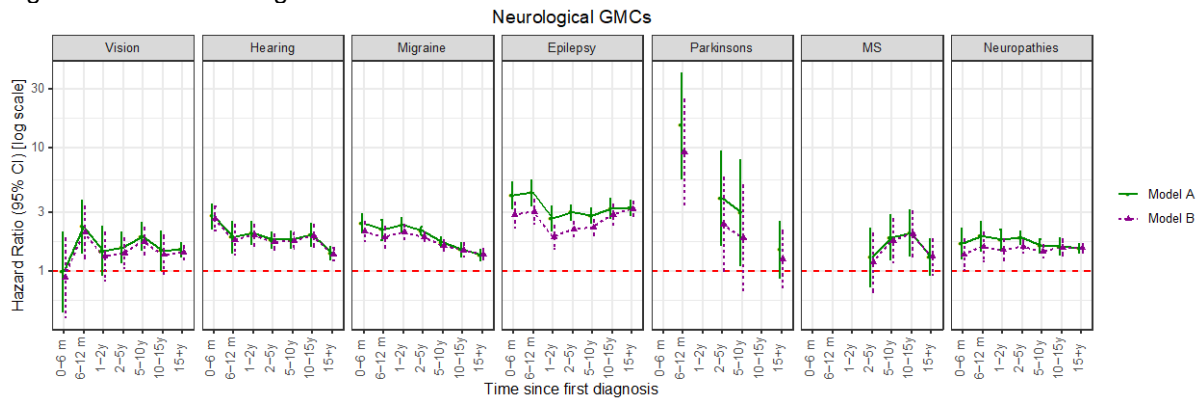

**Figures S53.1-S53.9. Sex-specific HRs and 95% CIs for males and females of being diagnosed with each medical condition comparing those with and without a prior diagnosis of Organic Disorders, depending on time since first diagnosis**

Figure S53.1 - Circulatory Conditions

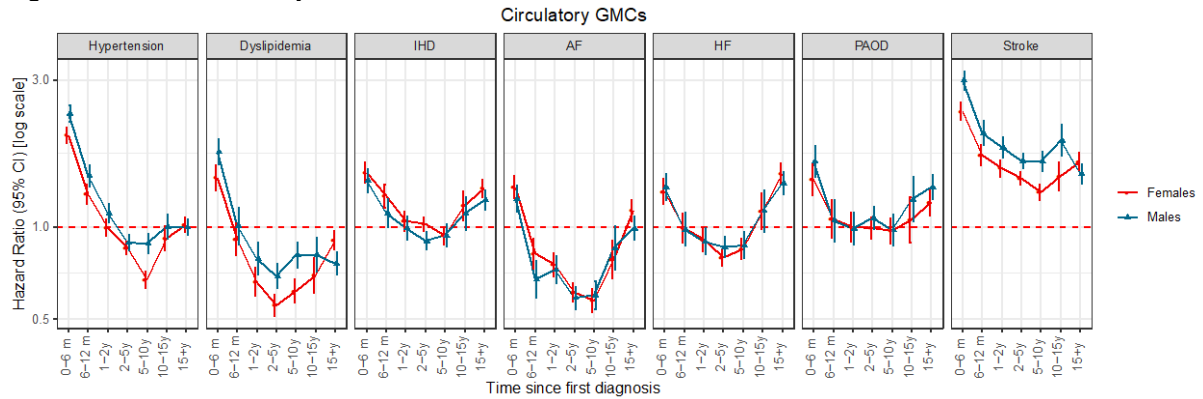

Figure S53.2 - Endocrine Conditions

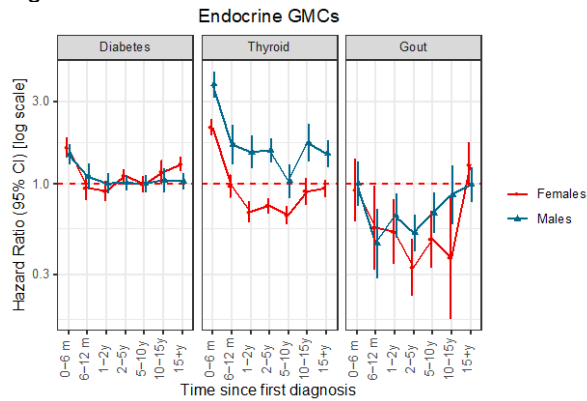

Figure S53.3 - Pulmonary Conditions

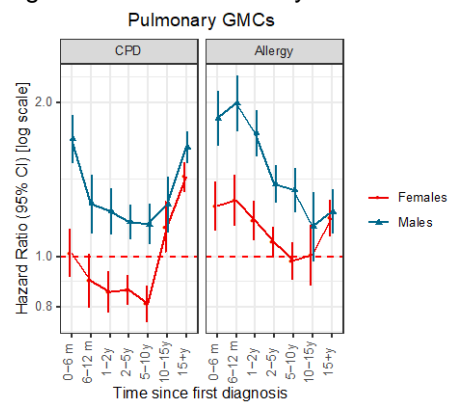

Figure S53.4 - Gastrointestinal Conditions

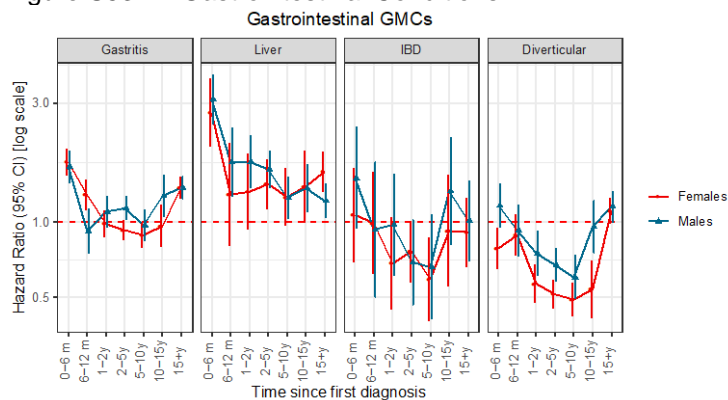

Figure S53.5 - Urogenital Conditions

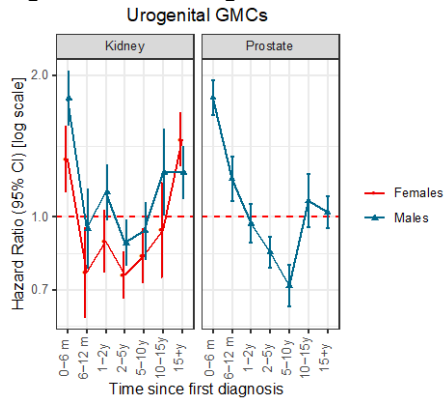

Figure S53.6 - Musculoskeletal Conditions

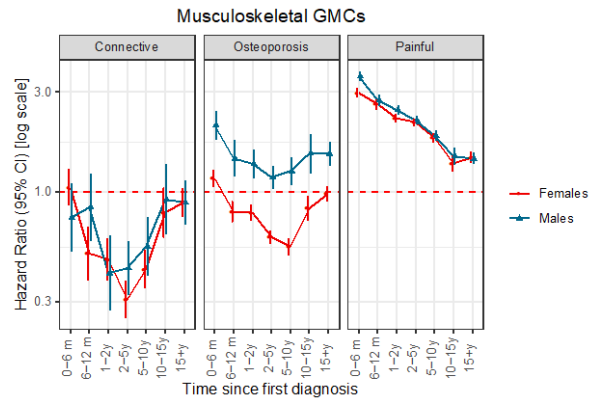

Figure S53.7 - Hematological Conditions

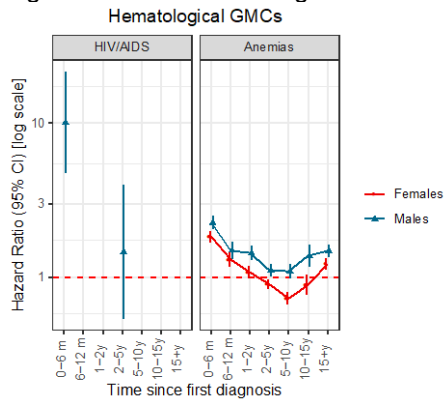

Figure S53.8 - Cancer

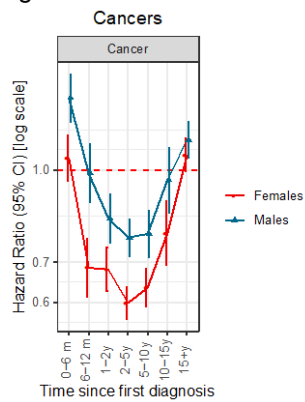

Figure S53.9 - Neurological Conditions

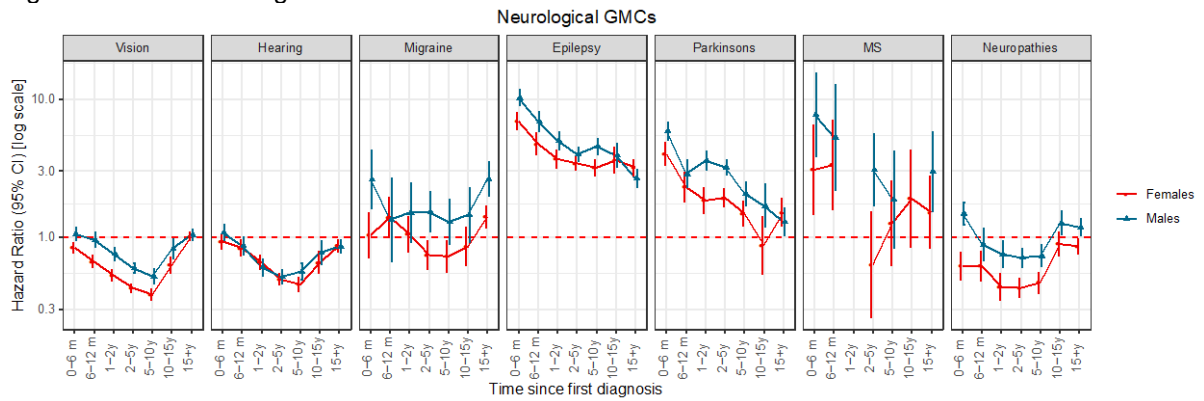



**Figures S54.1-S54.9. Sex-specific HRs and 95% CIs of being diagnosed with each medical condition comparing those with and without a prior diagnosis of Substance Use Disorders, depending on time since first diagnosis**  
**Figure S54.1 - Circulatory Conditions**

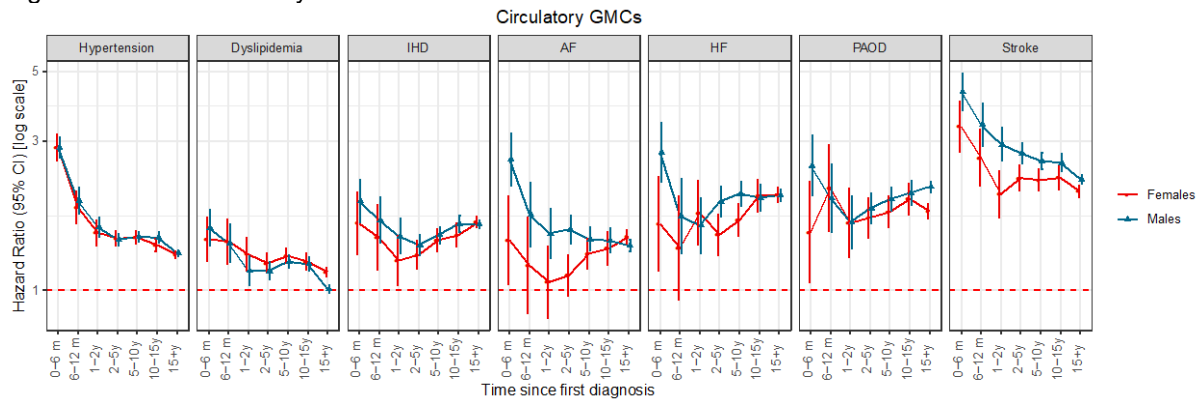

**Figure S54.2 - Endocrine Conditions**

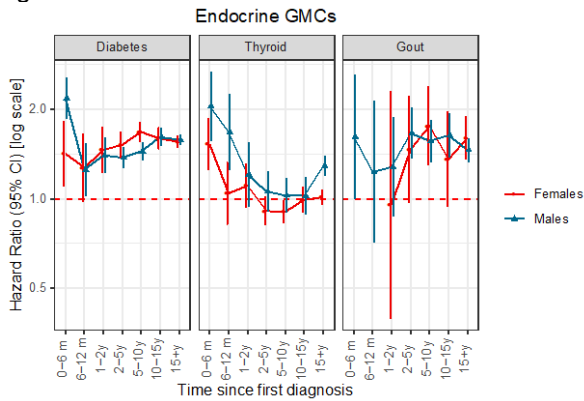

**Figure S54.3 - Pulmonary Conditions**

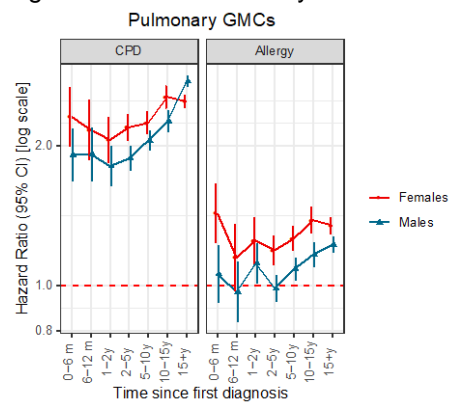

**Figure S54.4 - Gastrointestinal Conditions**

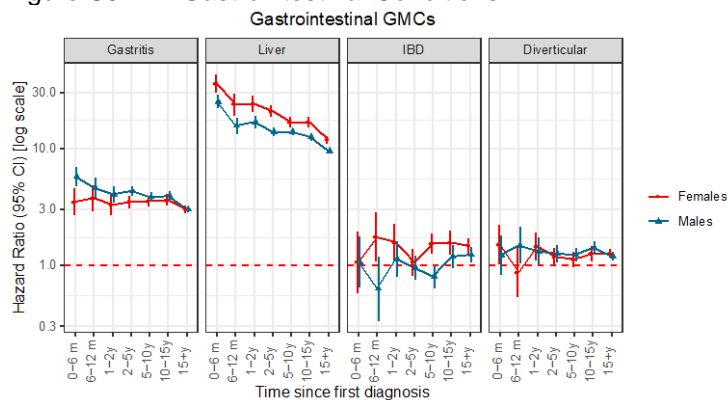

Figure S54.5 - Urogenital Conditions

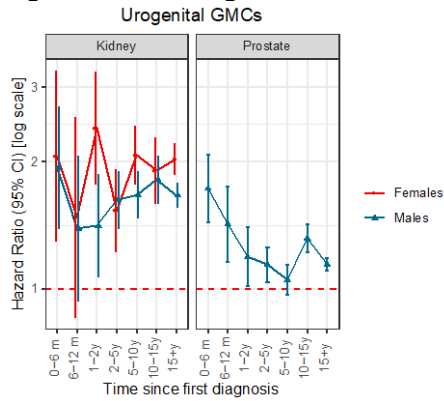

Figure S54.6 - Musculoskeletal Conditions

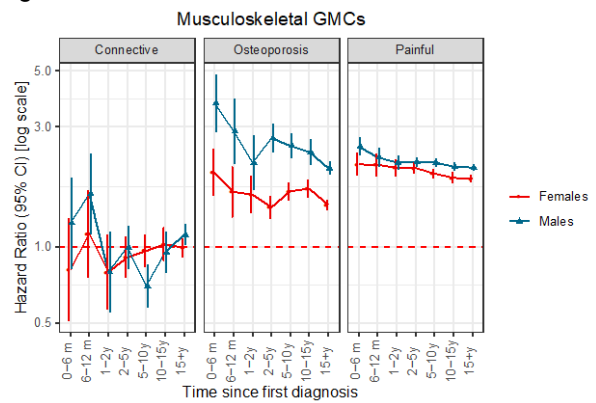

Figure S54.7 - Hematological Conditions

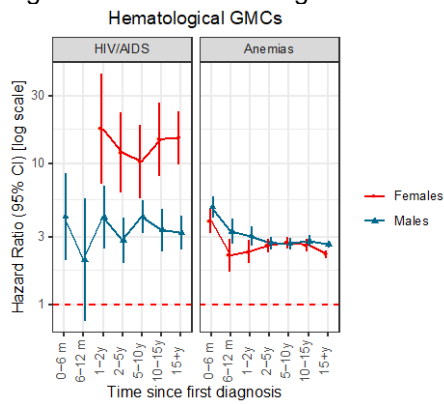

Figure S54.8 - Cancer

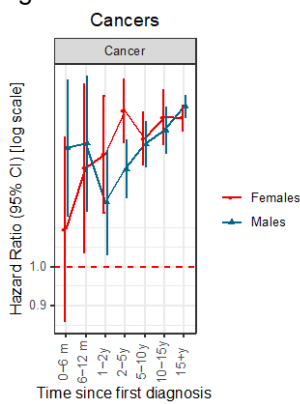

Figure S54.9 - Neurological Conditions

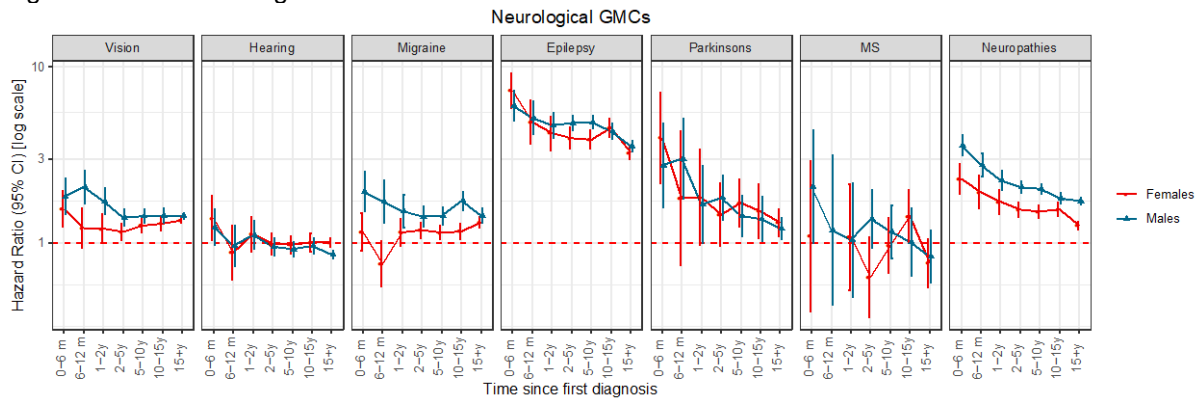

**Figures S55.1-S55.9. Sex-specific HRs and 95% CIs of being diagnosed with each medical condition comparing those with and without a prior diagnosis of Schizophrenia, depending on time since first diagnosis**

Figure S55.1 - Circulatory Conditions

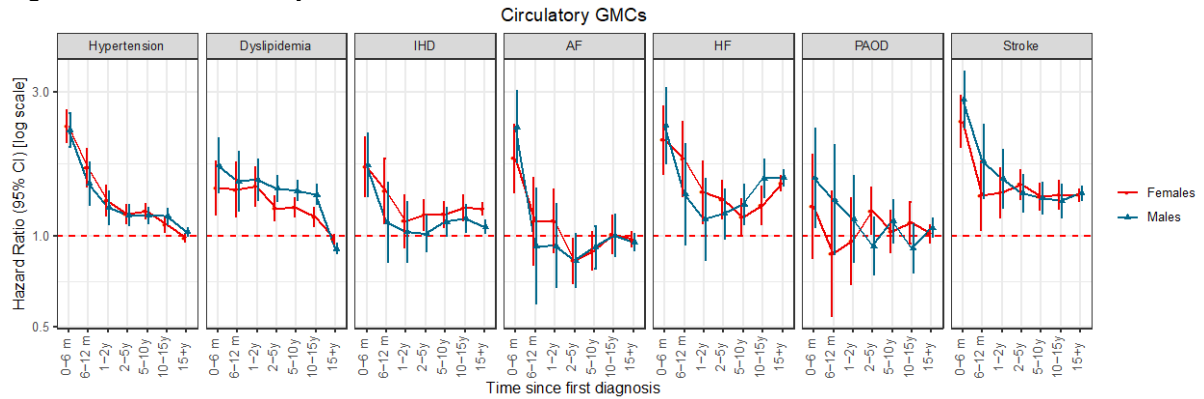

Figure S55.2 - Endocrine Conditions

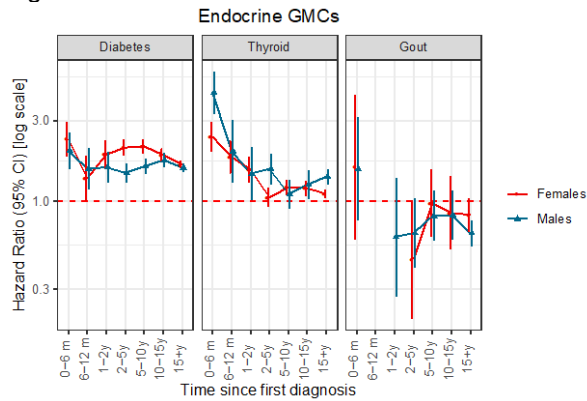

Figure S55.3 - Pulmonary Conditions

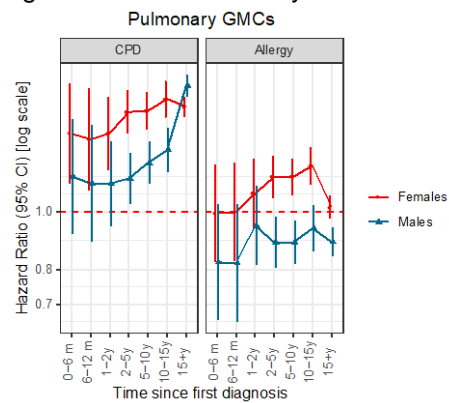

Figure S55.4 - Gastrointestinal Conditions

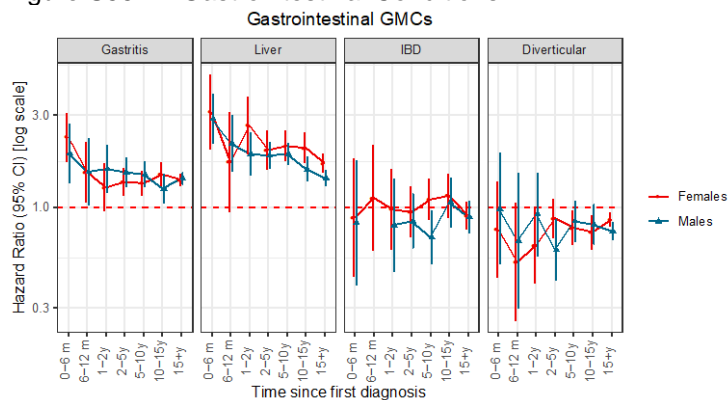

Figure S55.5 - Urogenital Conditions

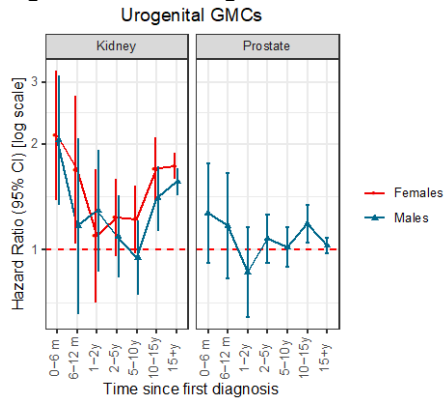

Figure S55.6 - Musculoskeletal Conditions

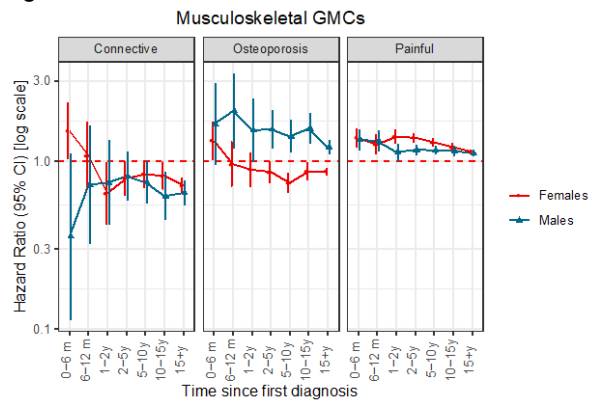

Figure S55.7 - Hematological Conditions

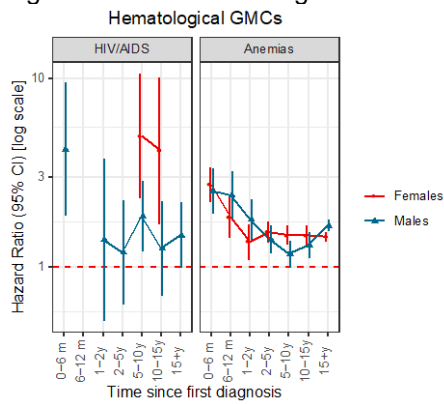

Figure S55.8 - Cancer

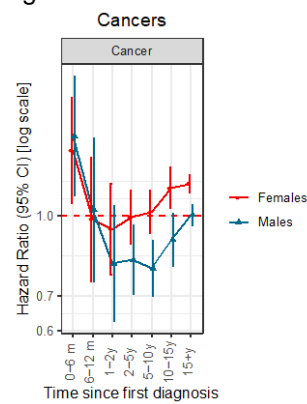

Figure S55.9 - Neurological Conditions

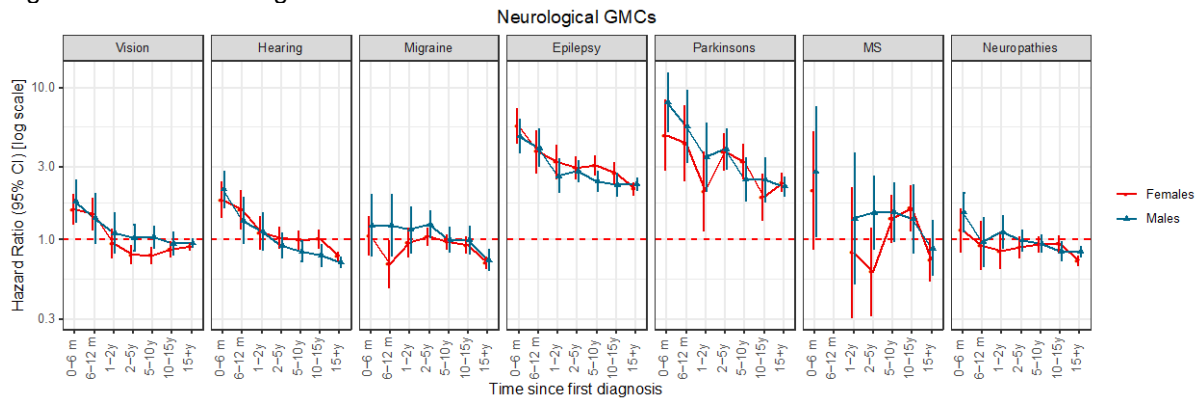

**Figures S56.1-56.9. Sex-specific HRs and 95% CIs of being diagnosed with each medical condition comparing those with and without a prior diagnosis of Mood Disorders, depending on time since first diagnosis**

Figure S56.1 - Circulatory Conditions

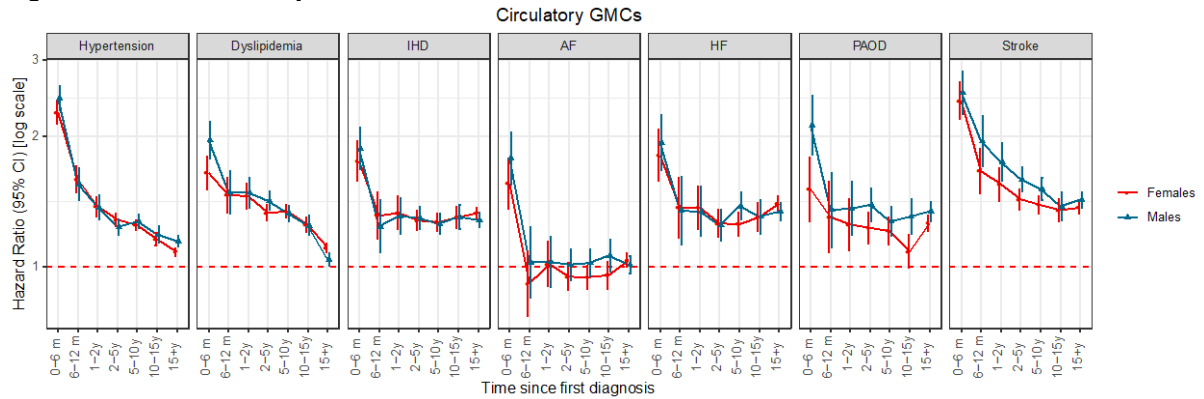

Figure S56.2 - Endocrine Conditions

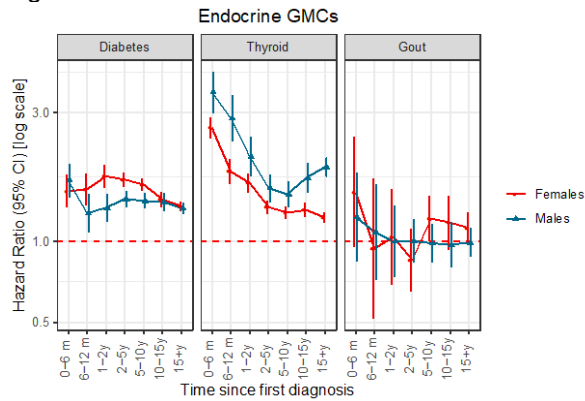

Figure S56.3 - Pulmonary Conditions

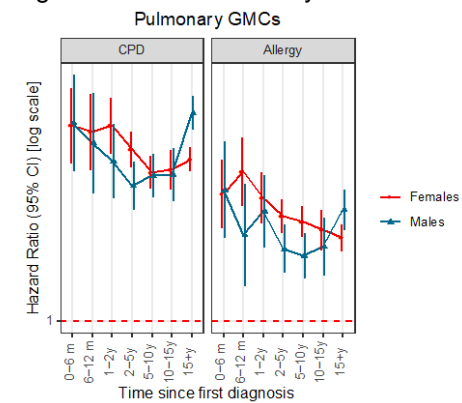

Figure S56.4 - Gastrointestinal Conditions

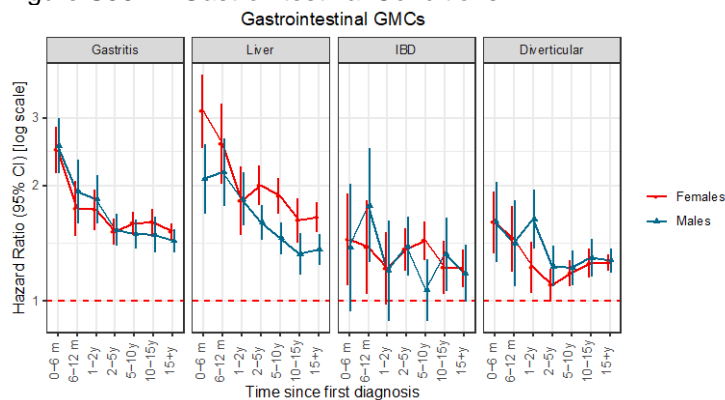

Figure S56.5 - Urogenital Conditions

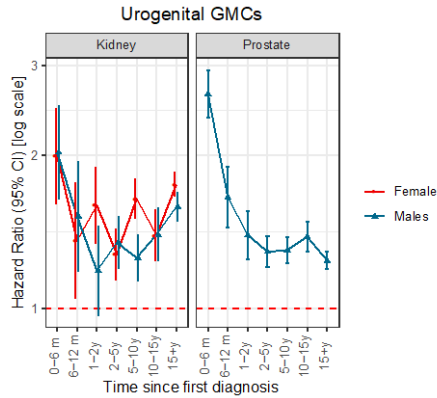

Figure S56.6 - Musculoskeletal Conditions

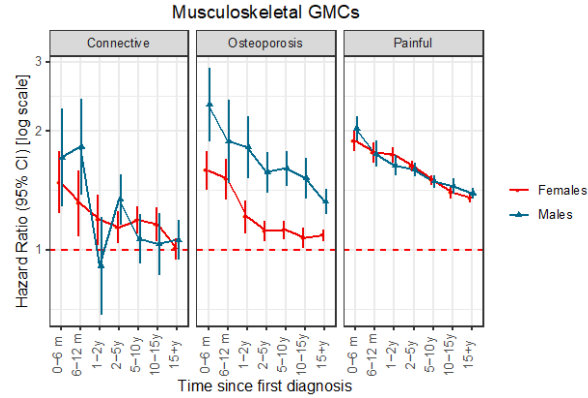

Figure S56.7 - Hematological Conditions

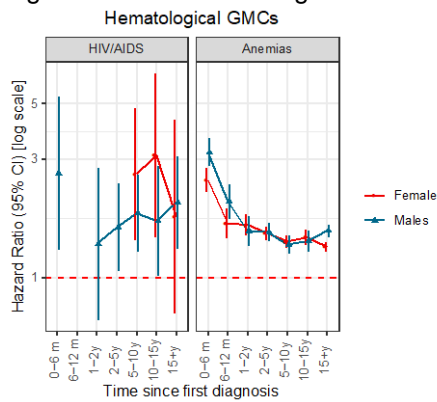

Figure S56.8 - Cancer

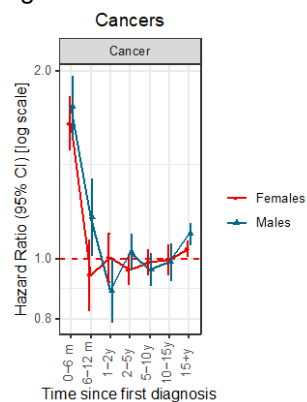

Figure S56.9 - Neurological Conditions

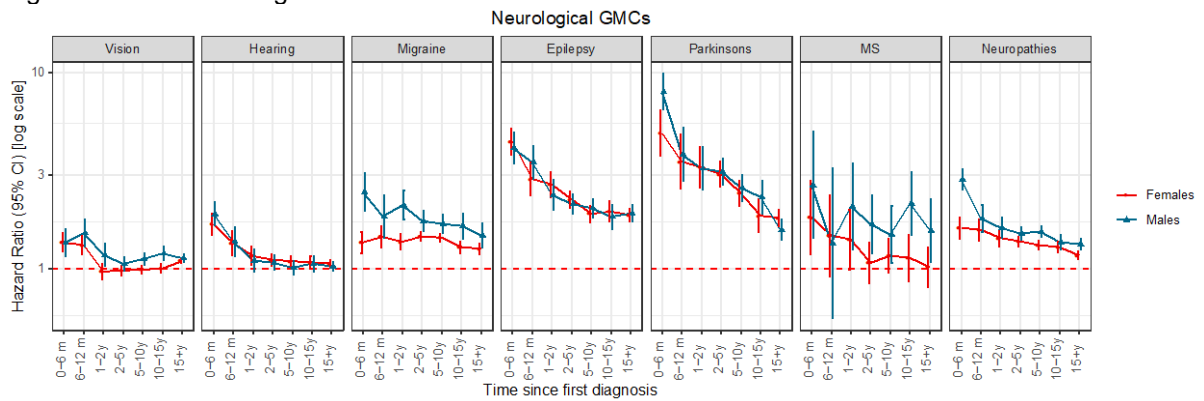

**Figures S57.1-S57.9. Sex-specific HRs and 95% CIs of being diagnosed with each medical condition comparing those with and without a prior diagnosis of Neurotic Disorders, depending on time since first diagnosis**  
**Figure S57.1 - Circulatory Conditions**

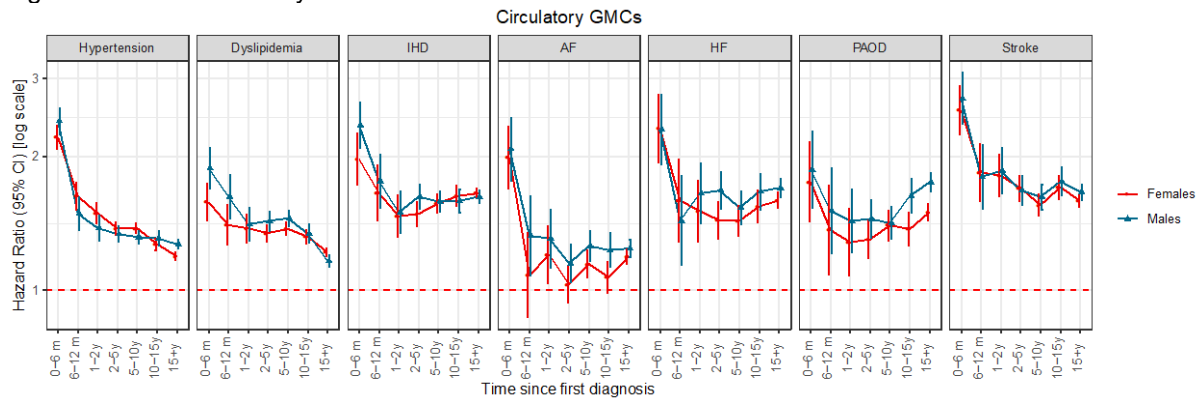

**Figure S57.2 - Endocrine Conditions**

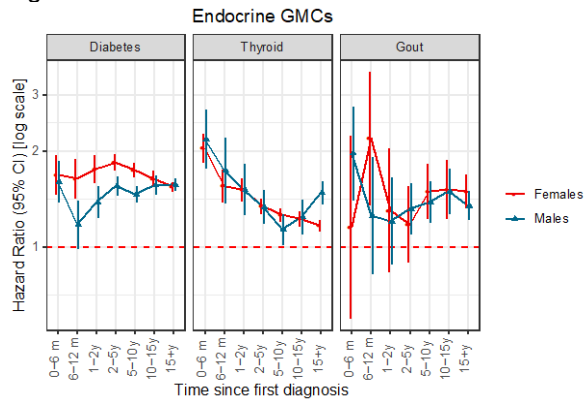

**Figure S57.3 - Pulmonary Conditions**

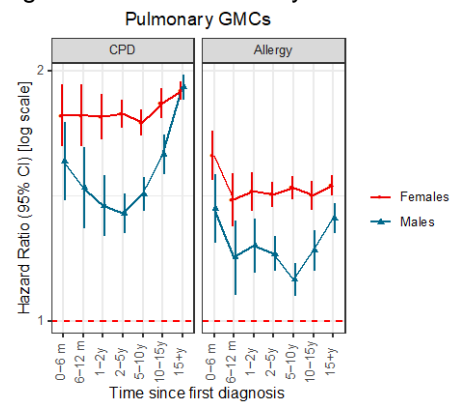

**Figure S57.4 - Gastrointestinal Conditions**

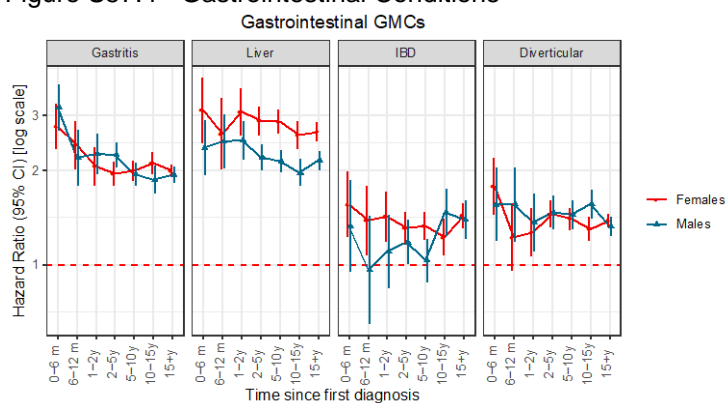

Figure S57.5 - Urogenital Conditions

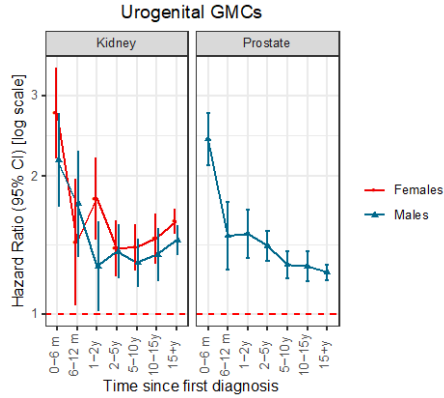

Figure S57.6 - Musculoskeletal Conditions

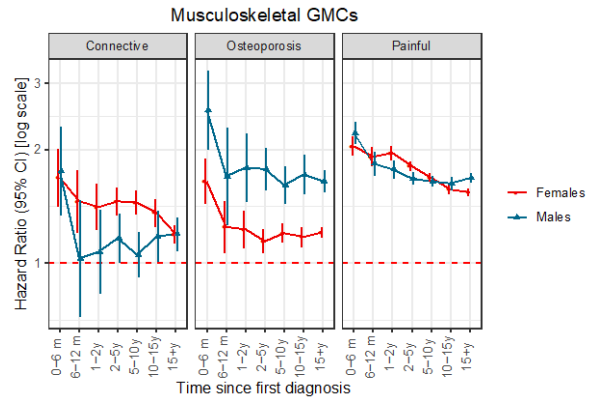

Figure S57.7 - Hematological Conditions

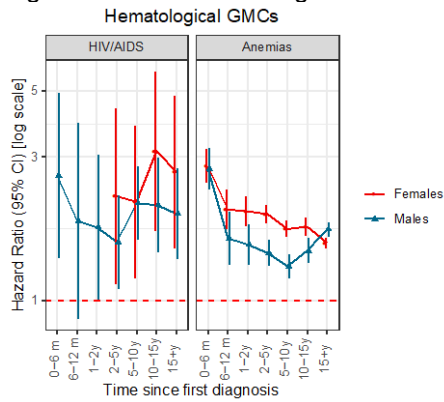

Figure S57.8 - Cancer

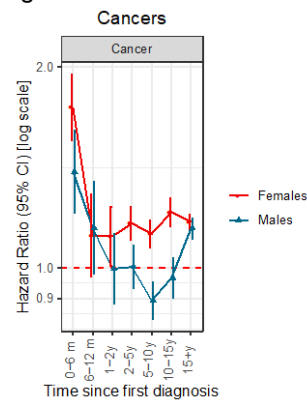

Figure S57.9 - Neurological Conditions

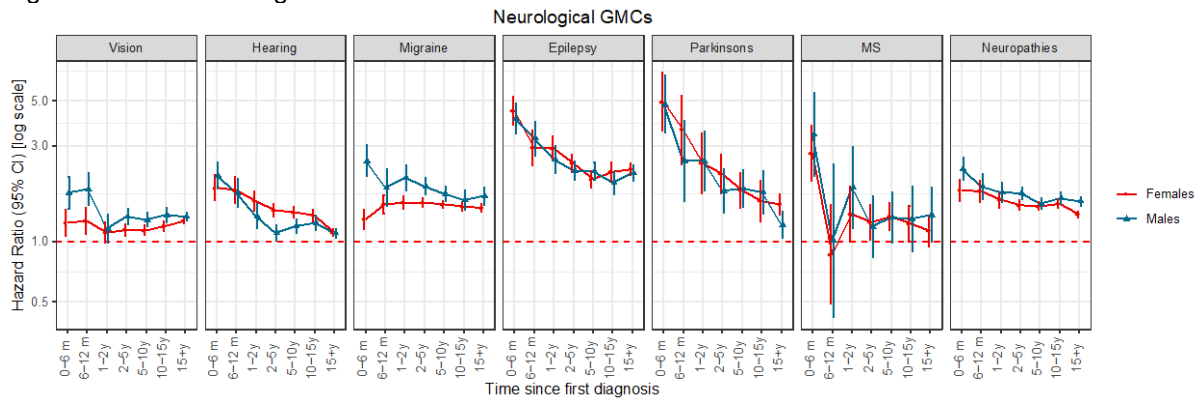



**Figures S58.1-S58.9. Sex-specific HRs and 95% CIs of being diagnosed with each medical condition comparing those with and without a prior diagnosis of Eating Disorders, depending on time since first diagnosis**

Figure S58.1 - Circulatory Conditions

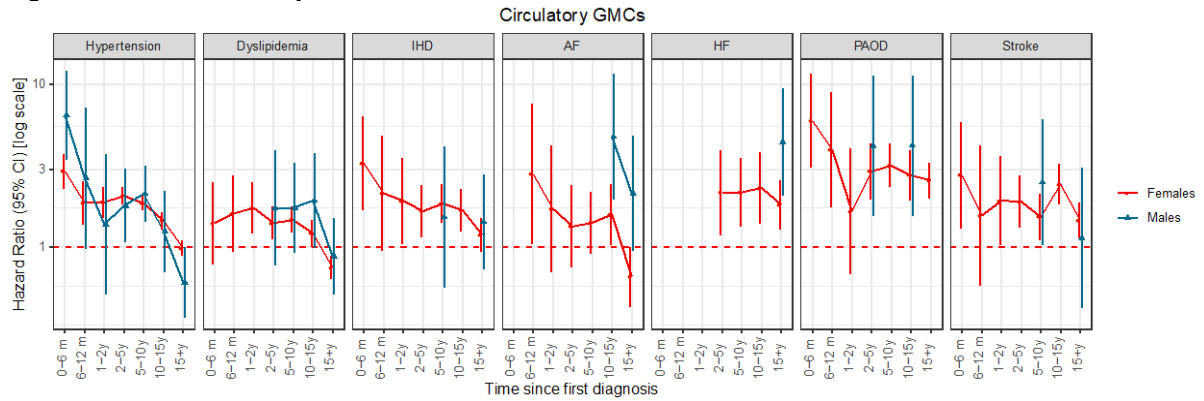

Figure S58.2 - Endocrine Conditions

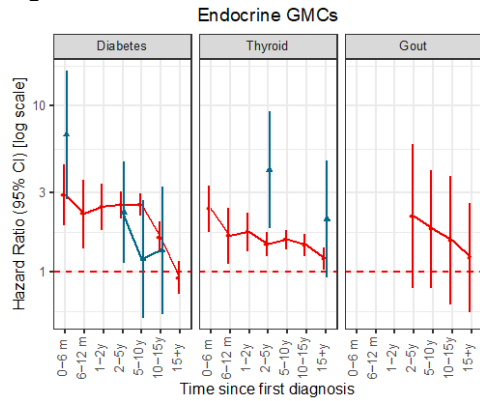

Figure S58.3 - Pulmonary Conditions

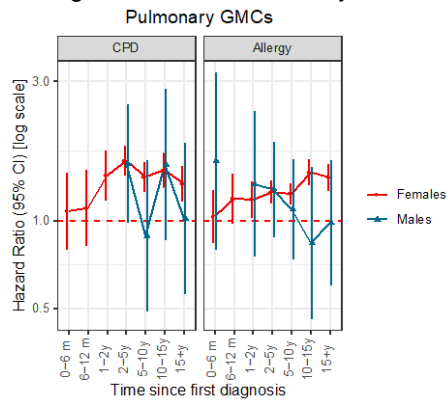

Figure S58.4 - Gastrointestinal Conditions

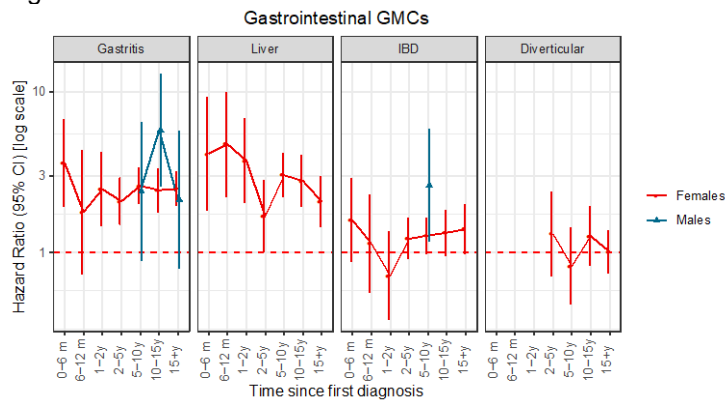

Figure S58.5 - Urogenital Conditions  
Urogenital GMCs

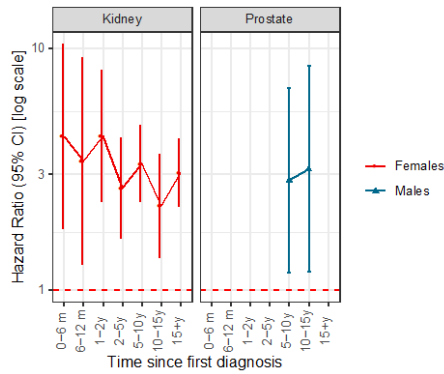

Figure S58.6 - Musculoskeletal Conditions  
Musculoskeletal GMCs

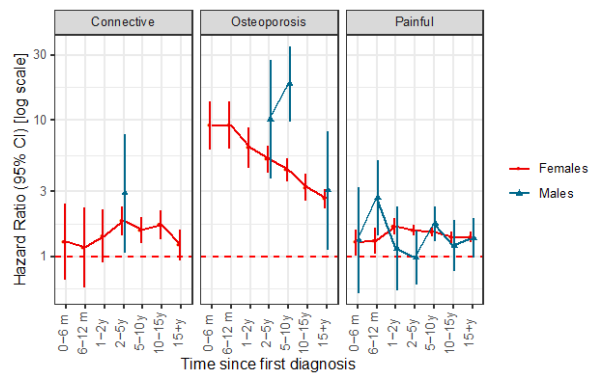

Figure S58.7 - Hematological Conditions  
Hematological GMCs

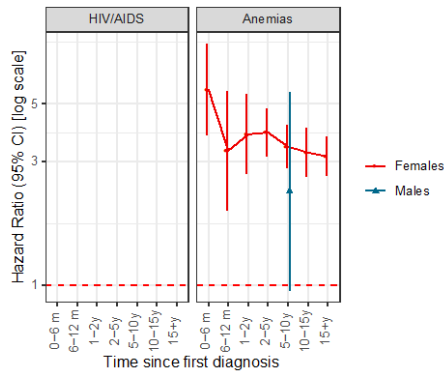

Figure S58.8 - Cancer

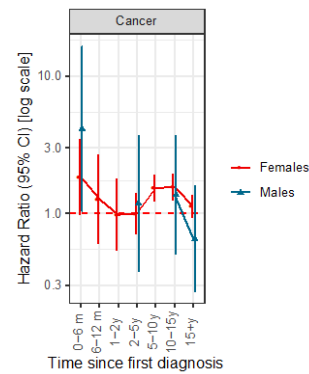

Figure S58.9 - Neurological Conditions

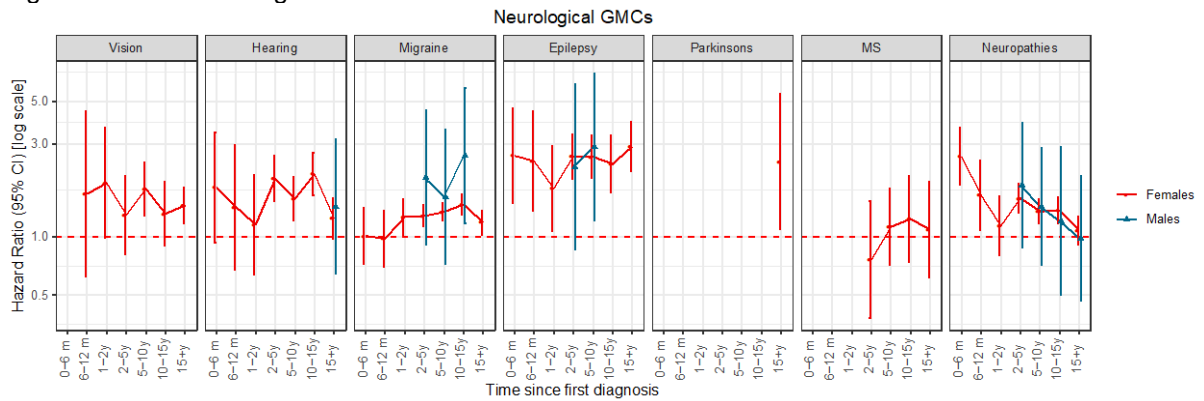

**Figures S59.1-S59.9. Sex-specific HRs and 95% CIs of being diagnosed with each medical condition comparing those with and without a prior diagnosis of Personality Disorders, depending on time since first diagnosis**  
**Figure S59.1 - Circulatory Conditions**

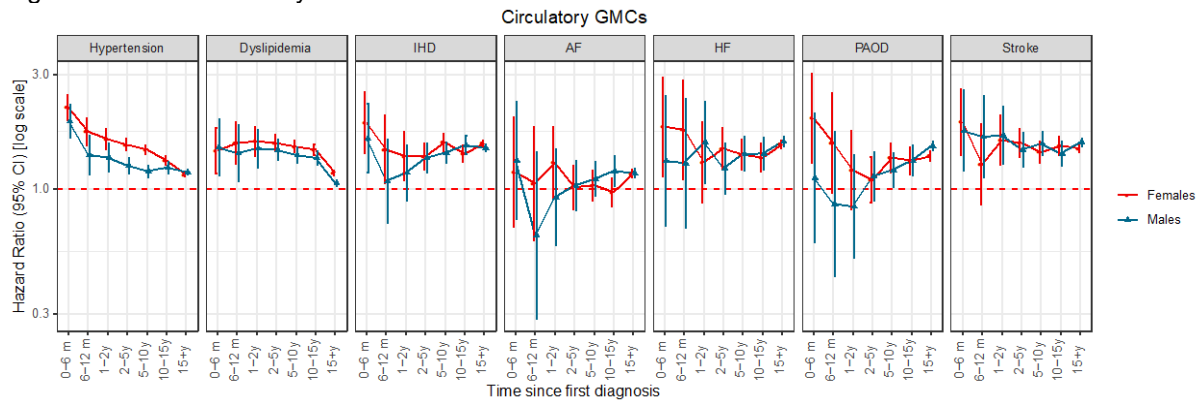

**Figure S59.2 - Endocrine Conditions**

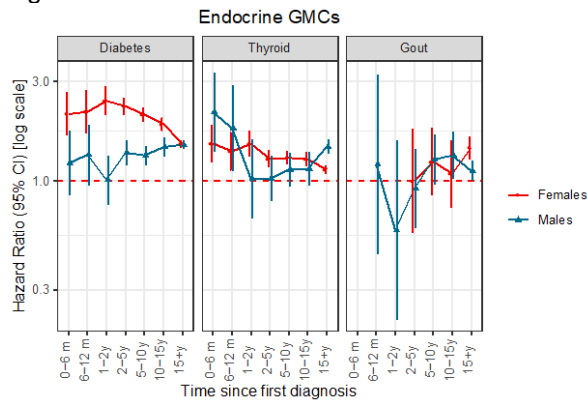

**Figure S59.3 - Pulmonary Conditions**

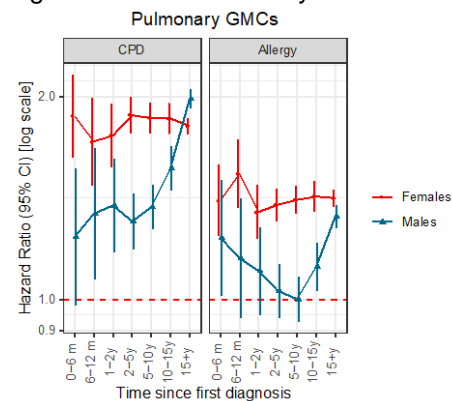

**Figure S59.4 - Gastrointestinal Conditions**

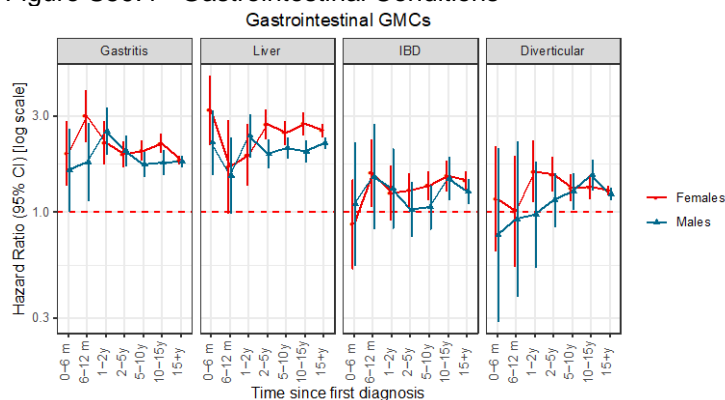

Figure S59.5 - Urogenital Conditions

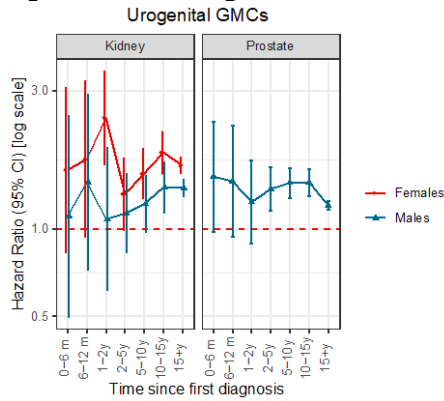

Figure S59.6 - Musculoskeletal Conditions

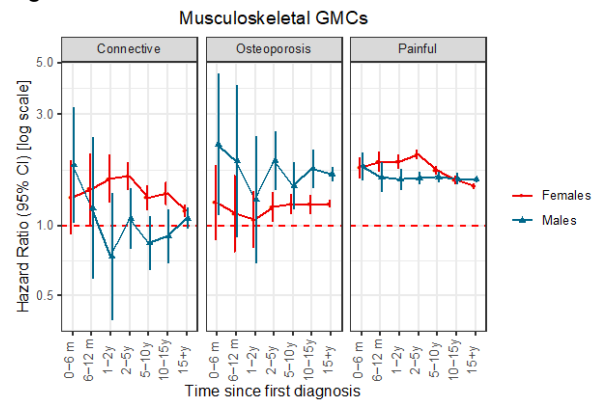

Figure S59.7 - Hematological Conditions

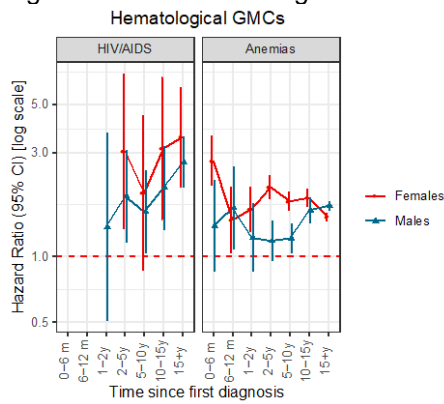

Figure S59.8 - Cancer

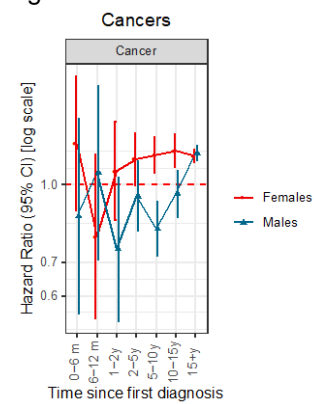

Figure S59.9 - Neurological Conditions

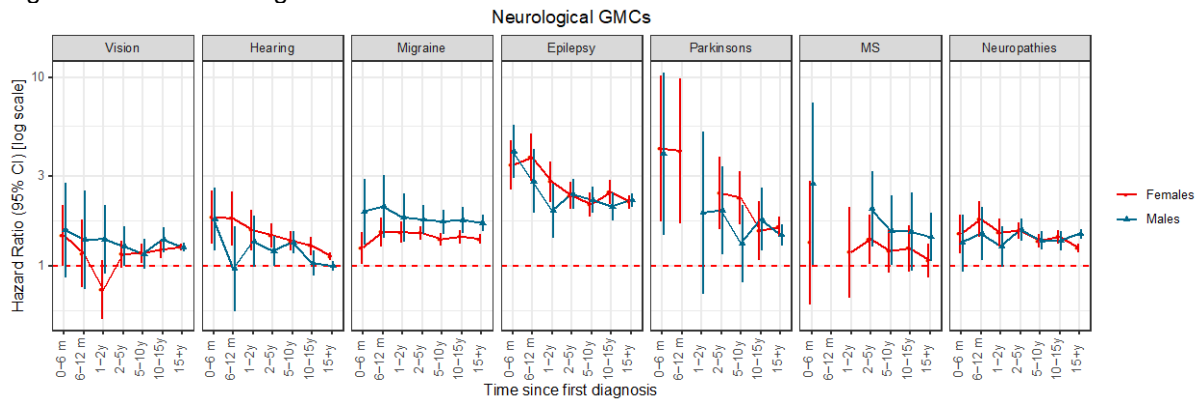

**Figures S60.1-S60.9. Sex-specific HRs and 95% CIs of being diagnosed with each medical condition comparing those with and without a prior diagnosis of Intellectual Disabilities, depending on time since first diagnosis**  
**Figure S60.1 - Circulatory Conditions**

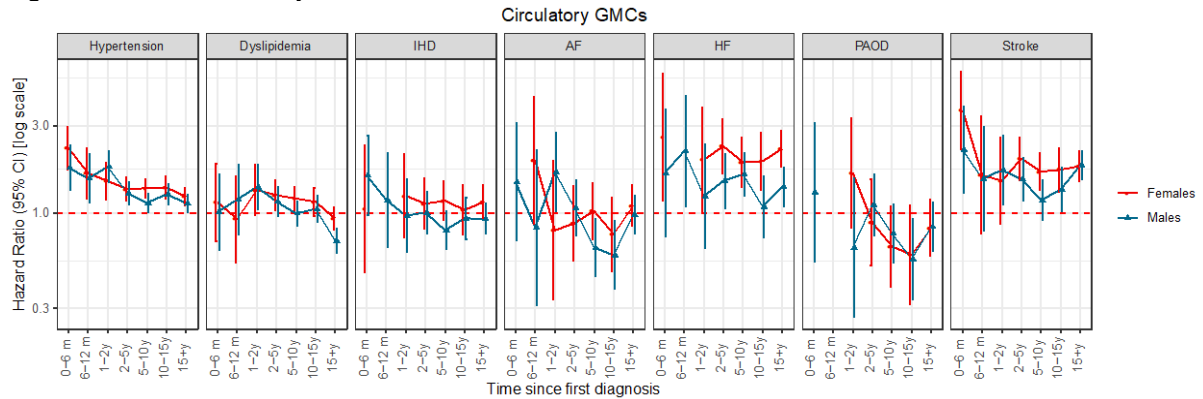

**Figure S60.2 - Endocrine Conditions**

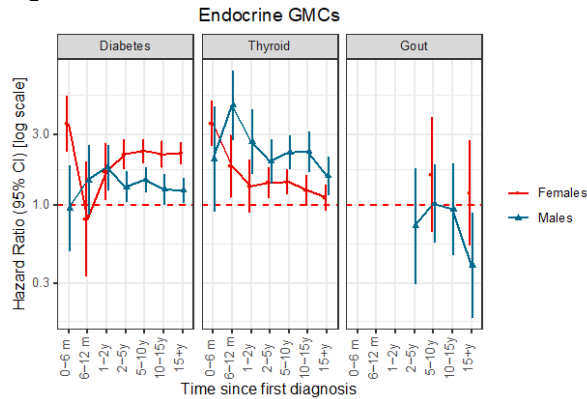

**Figure S60.3 - Pulmonary Conditions**

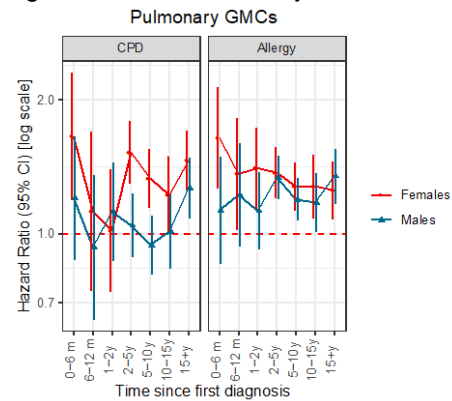

**Figure S60.4 - Gastrointestinal Conditions**

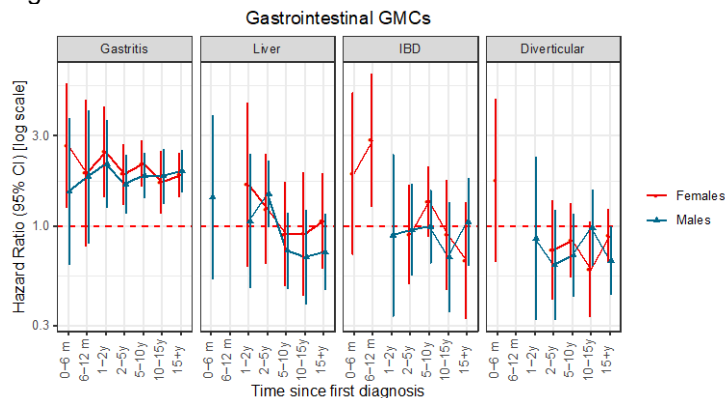

Figure S60.5 - Urogenital Conditions

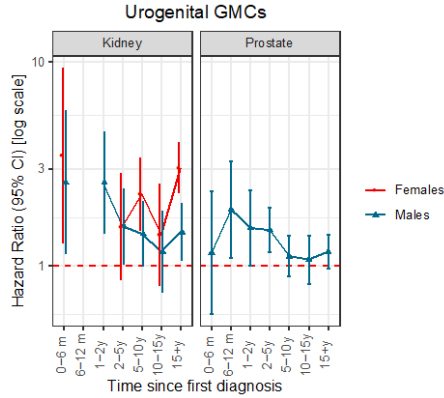

Figure S60.6 - Musculoskeletal Conditions

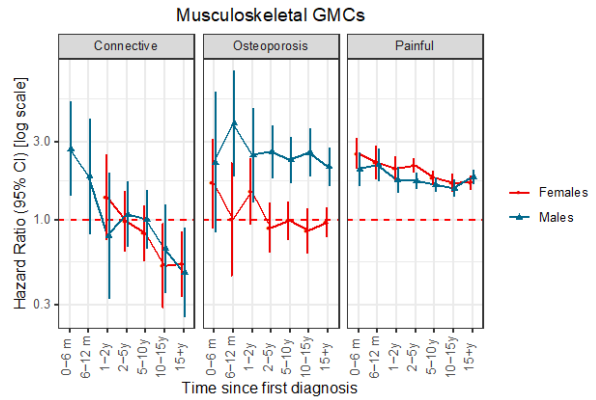

Figure S60.7 - Hematological Conditions

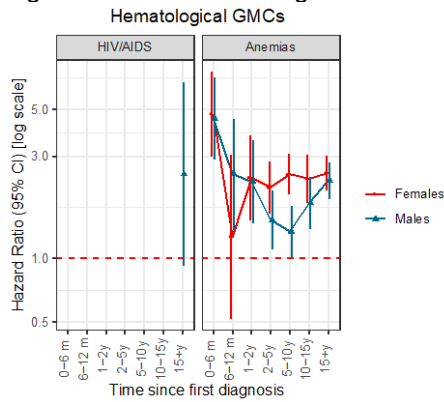

Figure S60.8 - Cancer

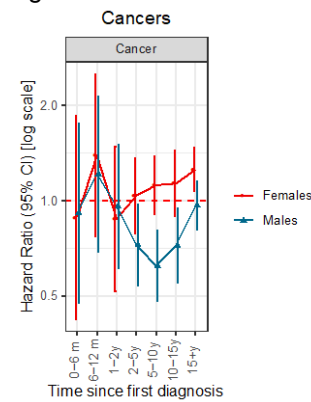

Figure S60.9 - Neurological Conditions

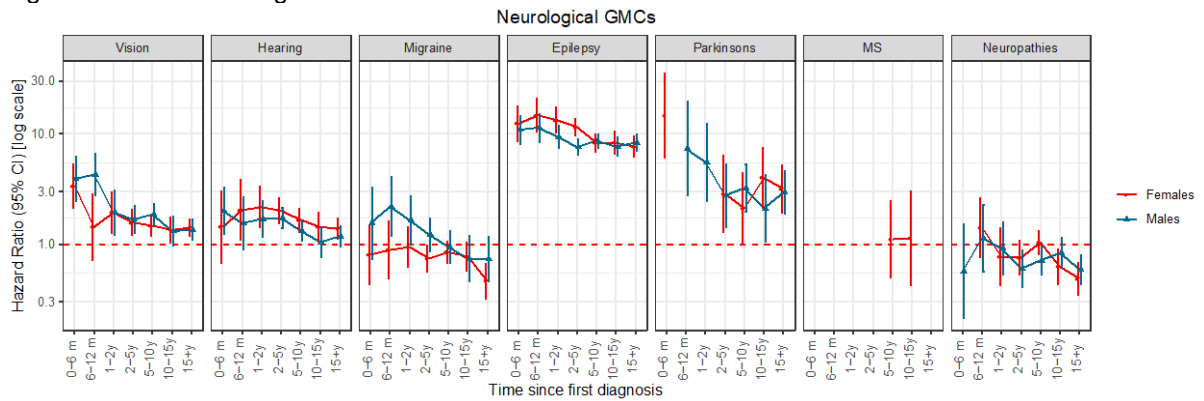

**Figures S61.1-S61.9. Sex-specific HRs and 95% CIs of being diagnosed with each medical condition comparing those with and without a prior diagnosis of Developmental Disorders, depending on time since first diagnosis**  
**Figure S61.1 - Circulatory Conditions**

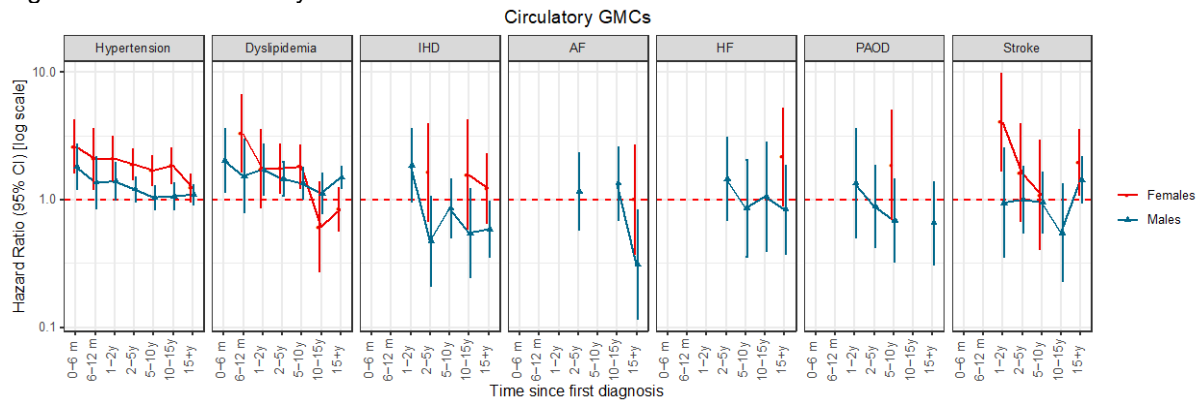

**Figure S61.2 - Endocrine Conditions**

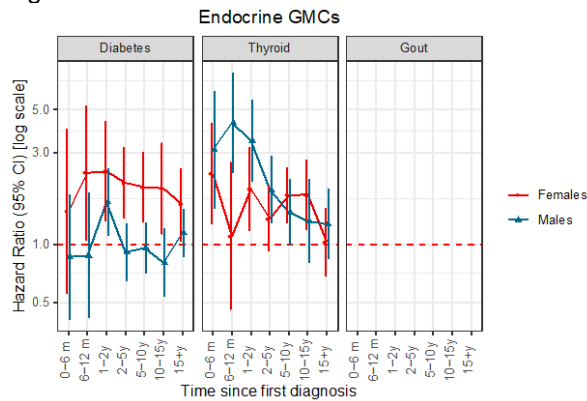

**Figure S61.3 - Pulmonary Conditions**

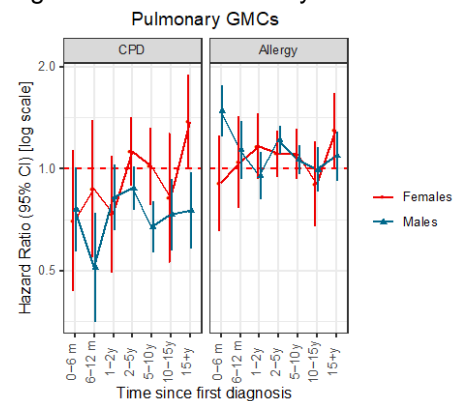

**Figure S61.4 - Gastrointestinal Conditions**

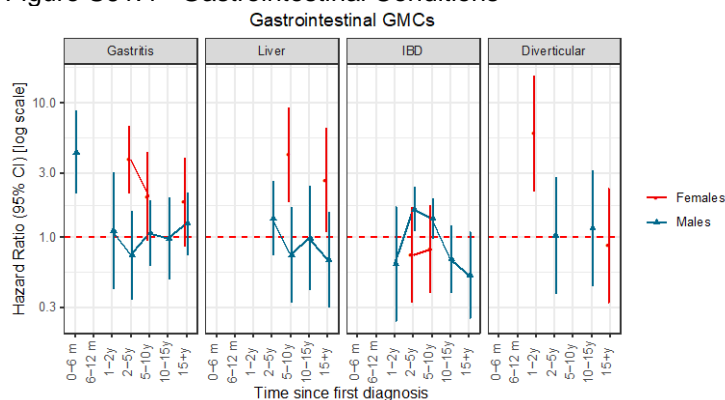

Figure S61.5 - Urogenital Conditions  
Urogenital GMCs

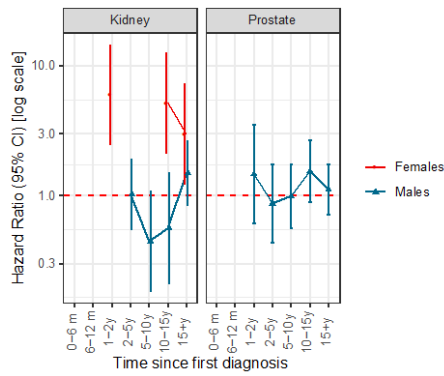

Figure S61.6 - Musculoskeletal Conditions  
Musculoskeletal GMCs

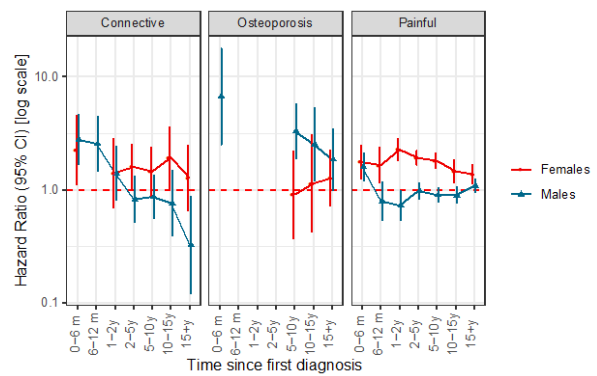

Figure S61.7 - Hematological Conditions  
Hematological GMCs

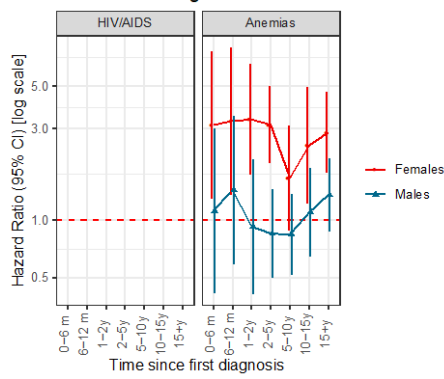

Figure S61.8 - Cancer  
Cancers

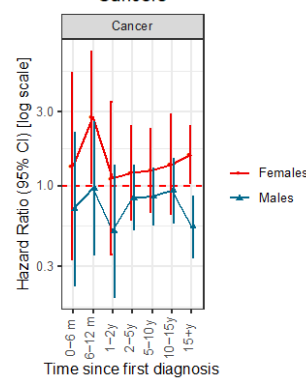

Figure S61.9 - Neurological Conditions  
Neurological GMCs

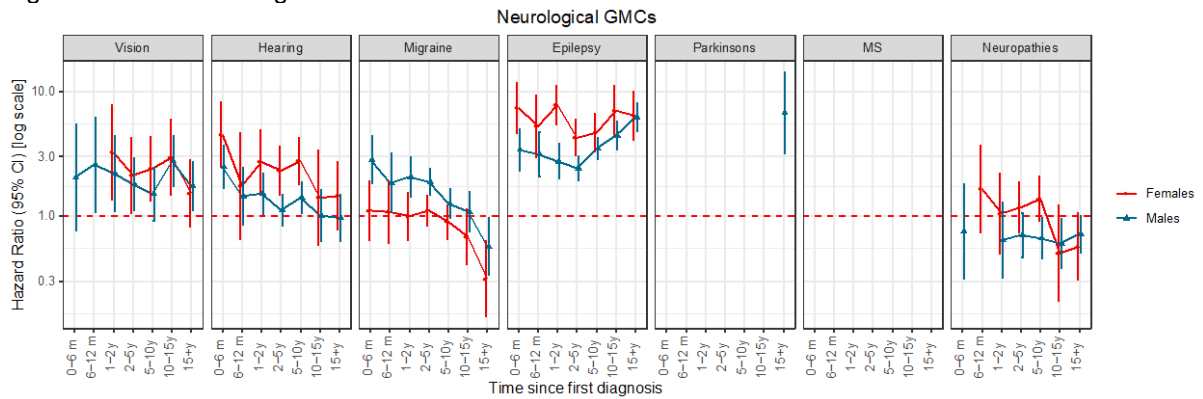



**Figures S62.1-S62.9. Sex-specific HRs and 95% CIs of being diagnosed with each medical condition comparing those with and without a prior diagnosis of Behavioral Disorders, depending on time since first diagnosis**  
**Figure S62.1 - Circulatory Conditions**

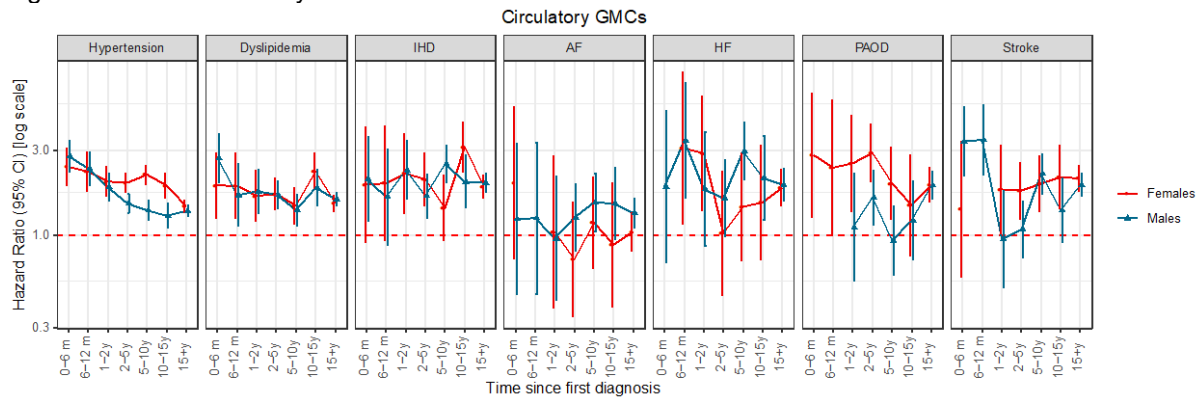

**Figure S62.2 - Endocrine Conditions**

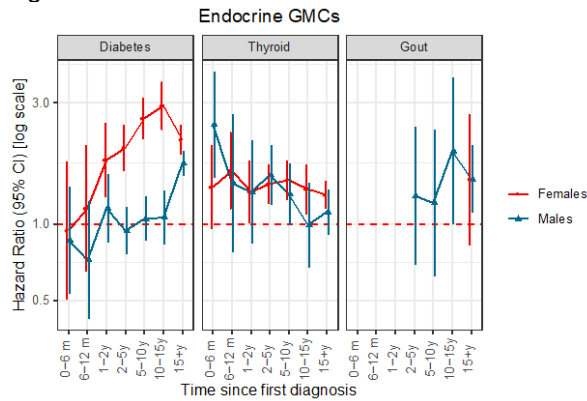

**Figure S62.3 - Pulmonary Conditions**

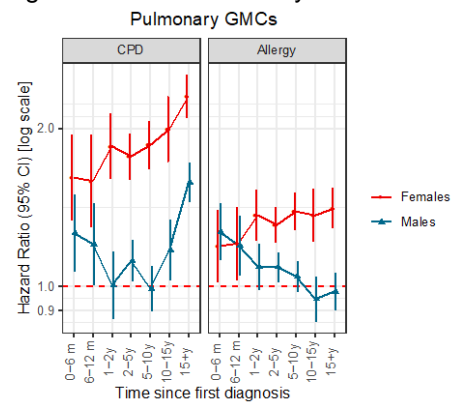

**Figure S62.4 - Gastrointestinal Conditions**

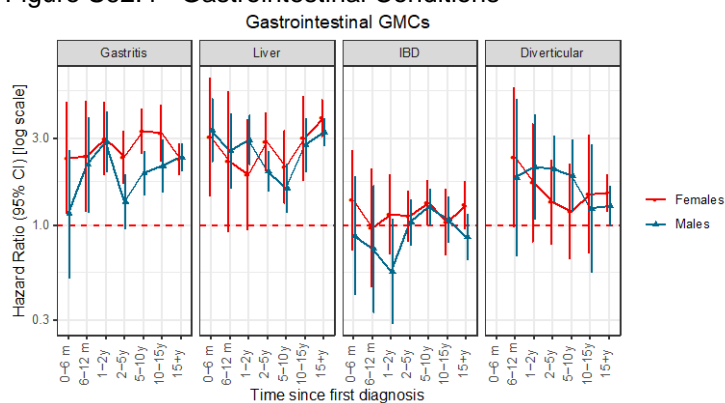

Figure S62.5 - Urogenital Conditions

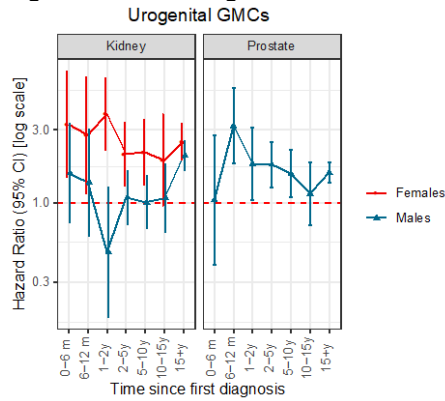

Figure S62.6 - Musculoskeletal Conditions

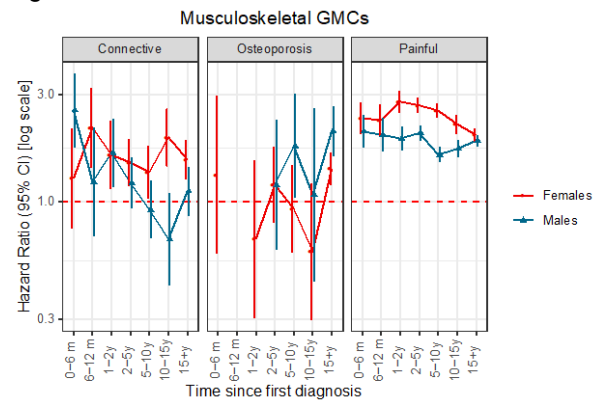

Figure S62.7 - Hematological Conditions

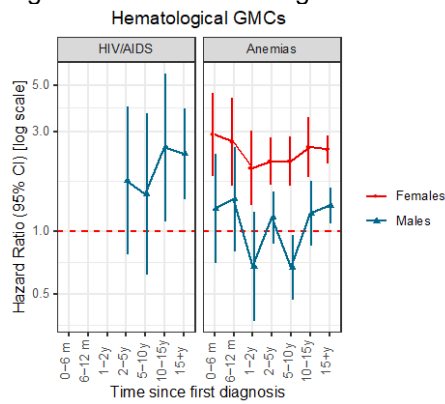

Figure S62.8 - Cancer

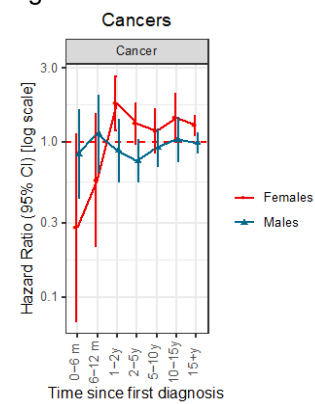

Figure S62.9 - Neurological Conditions

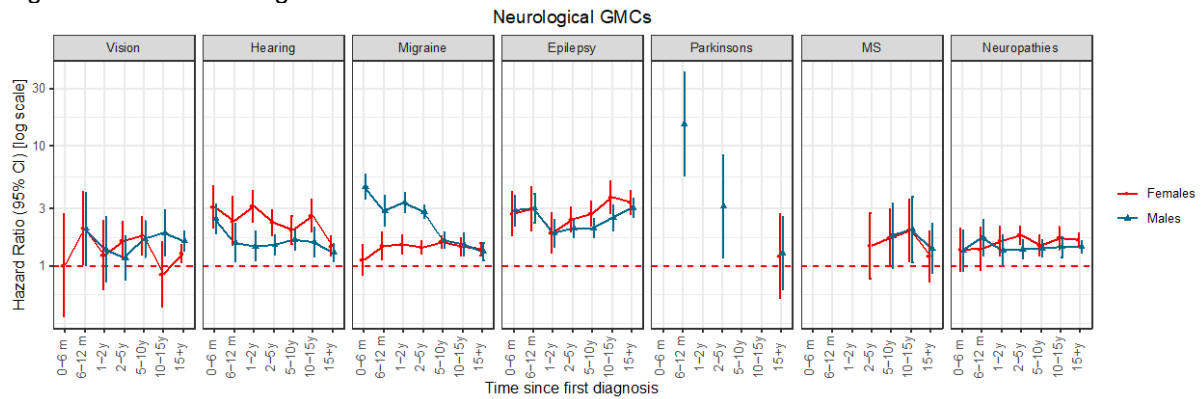

**Figures S63-S82. Absolute risks of general medical condition categories after diagnosis of mental disorders**

The following set of figures shows the sex- and time-specific absolute risks of being diagnosed with all medical conditions after being previously diagnosed with one of the mental disorders. They show the cumulative incidence proportions (CIPs) and 95% confidence intervals (95% CIs) estimated across all ages of being diagnosed with each medical condition (shown as label at the top of each panel). Each person diagnosed with specific mental disorder was matched to up to five 'reference individuals' of the same sex and born within 30 days of them. CIPs are shown for both those who were diagnosed with specific mental disorder from the time of diagnosis (bold, solid line) and the reference group (dashed lines).

Two graphs are provided for each mental disorder: CIPs for all persons (black lines) and sex-specific CIPs (males indicated by blue lines, females by red). Confidence intervals are displayed only for those with prior mental disorders, as the 95% CIs for the reference group will be proportional to those for people with prior mental disorders, but smaller. In some cases, 95% CIs are too small to be visible.

The horizontal axes show the time since first diagnosis of the mental disorder (or since diagnosis of the person the reference individuals were matched to). The vertical axes show the cumulative incidence proportions and 95% CIs (note these axes vary for each set of graphs).

Estimates with fewer than 50 persons at risk or fewer than 15 cases are not shown. Where numbers were too small to show CIPs for those with mental disorders, reference CIPs are not displayed either.

*Displaying estimates for all persons*

*The y-axis varies for each graph, however they range from 0 to a maximum of 68*

- S63. Organic Disorders
- S64. Substance Use Disorders
- S65. Schizophrenia
- S66. Mood Disorders
- S67. Neurotic Disorders
- S68. Eating Disorders
- S69. Personality Disorders
- S70. Intellectual Disorders
- S71. Developmental Disorders
- S72. Behavioral Disorders

*Displaying sex-specific estimates*

*The y-axis varies for each graph, however they range from 0 to a maximum of 71*

- S73. Organic Disorders
- S74. Substance Use Disorders
- S75. Schizophrenia
- S76. Mood Disorders
- S77. Neurotic Disorders
- S78. Eating Disorders
- S79. Personality Disorders
- S80. Intellectual Disorders
- S81. Developmental Disorders
- S82. Behavioral Disorders

**Figure S63. Absolute risks of being diagnosed with each medical condition after first diagnosis of Organic Disorders**

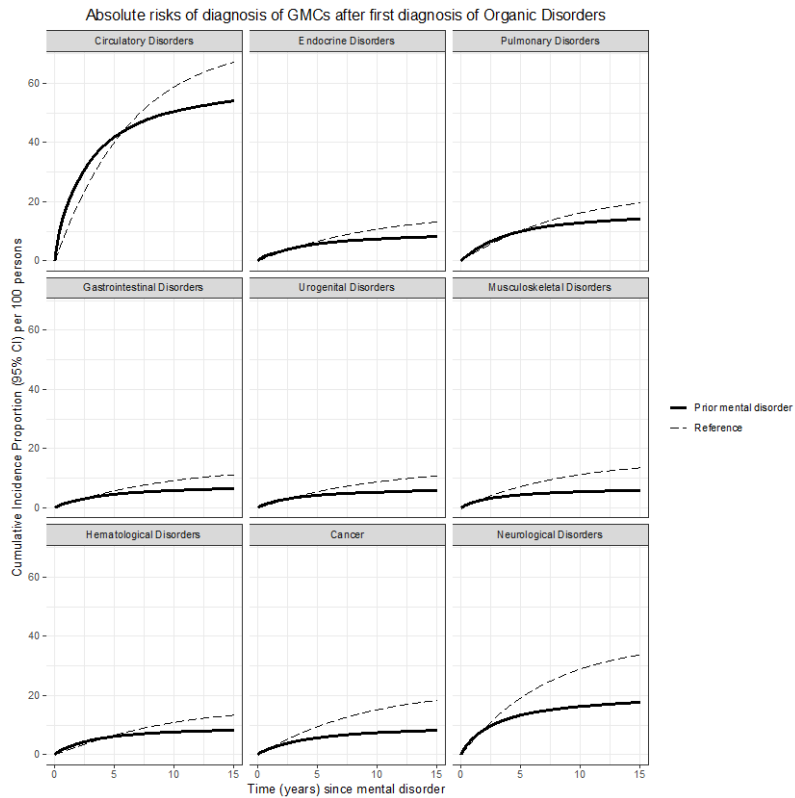

**Figure S64. Absolute risks of being diagnosed with each medical condition after first diagnosis of Substance Use Disorders**

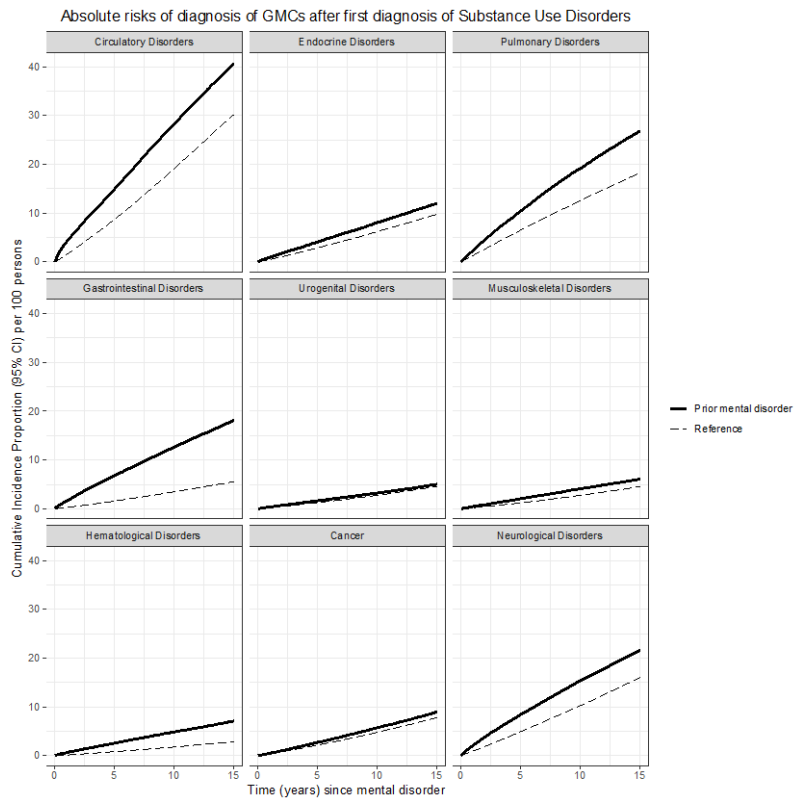

**Figure S65. Absolute risks of being diagnosed with each medical condition after first diagnosis of Schizophrenia**

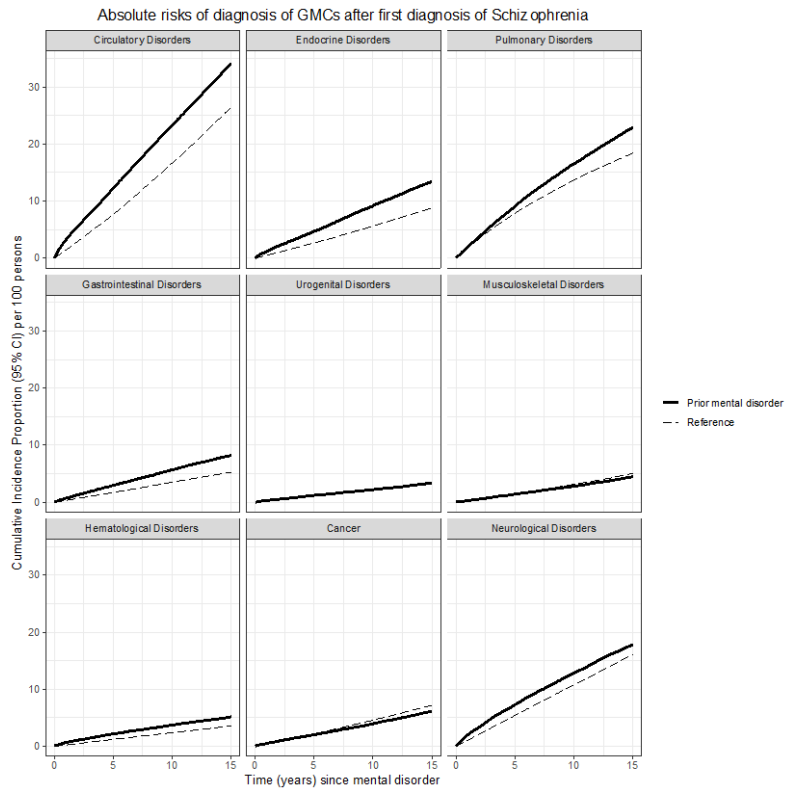

**Figure S66. Absolute risks of being diagnosed with each medical condition after first diagnosis of Mood Disorders**

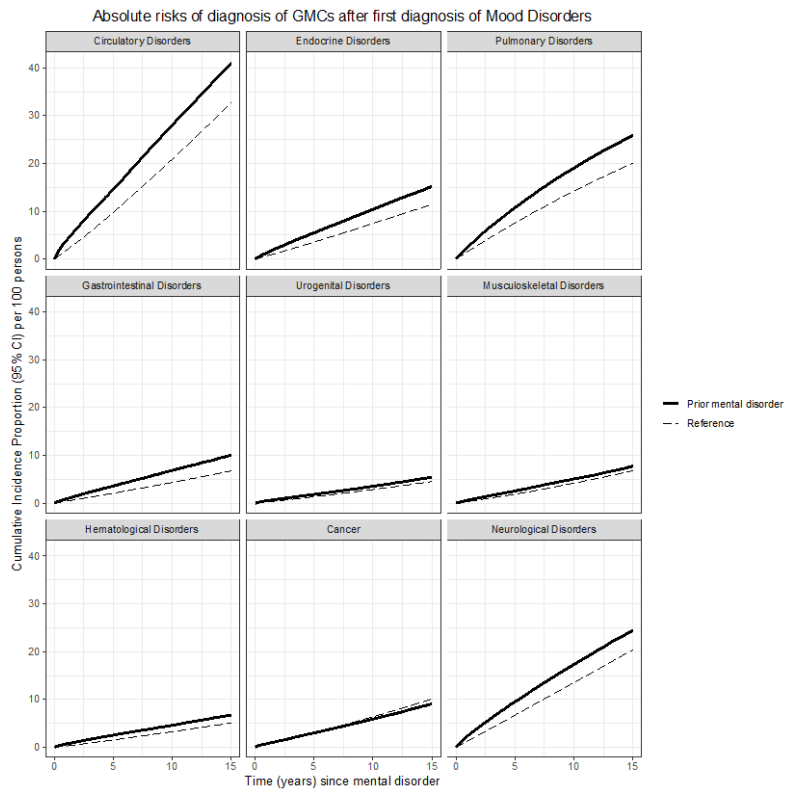

**Figure S67. Absolute risks of being diagnosed with each medical condition after first diagnosis of Neurotic Disorders**

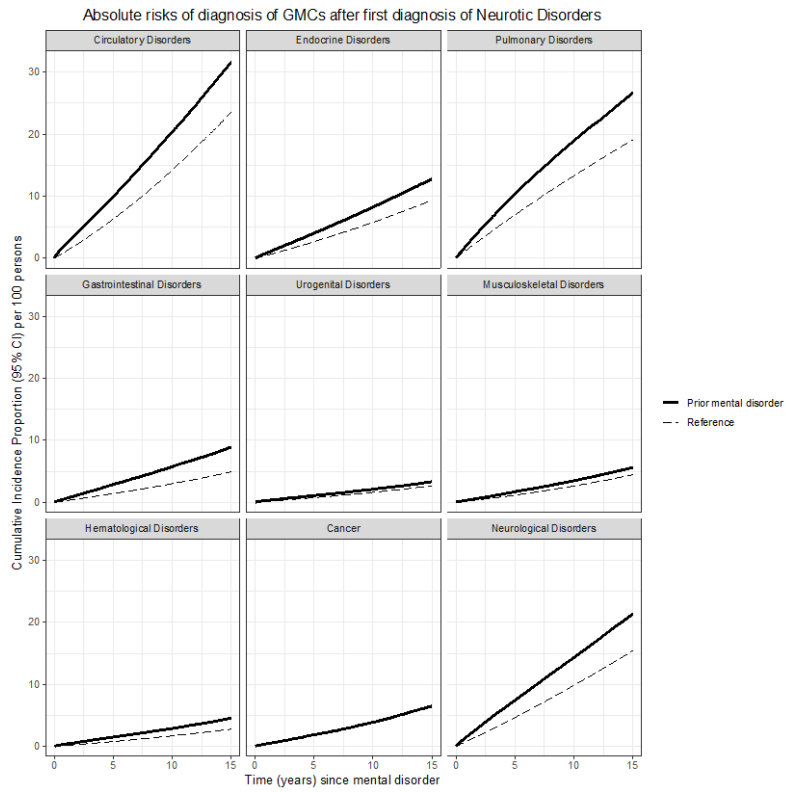

**Figure S68. Absolute risks of being diagnosed with each medical condition after first diagnosis of Eating Disorders**

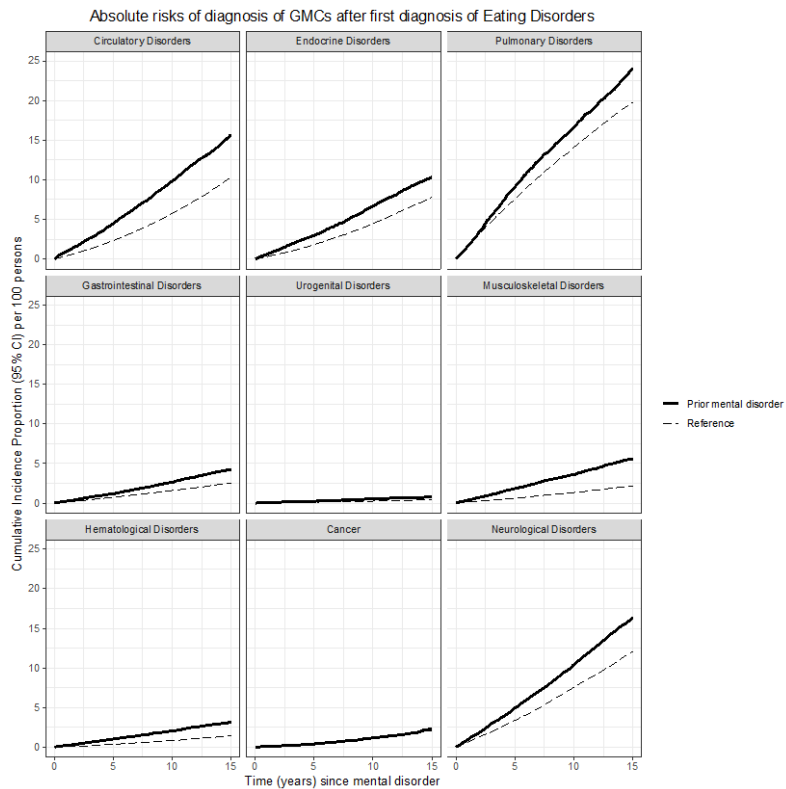

**Figure S69. Absolute risks of being diagnosed with each medical condition after first diagnosis of Personality Disorders**

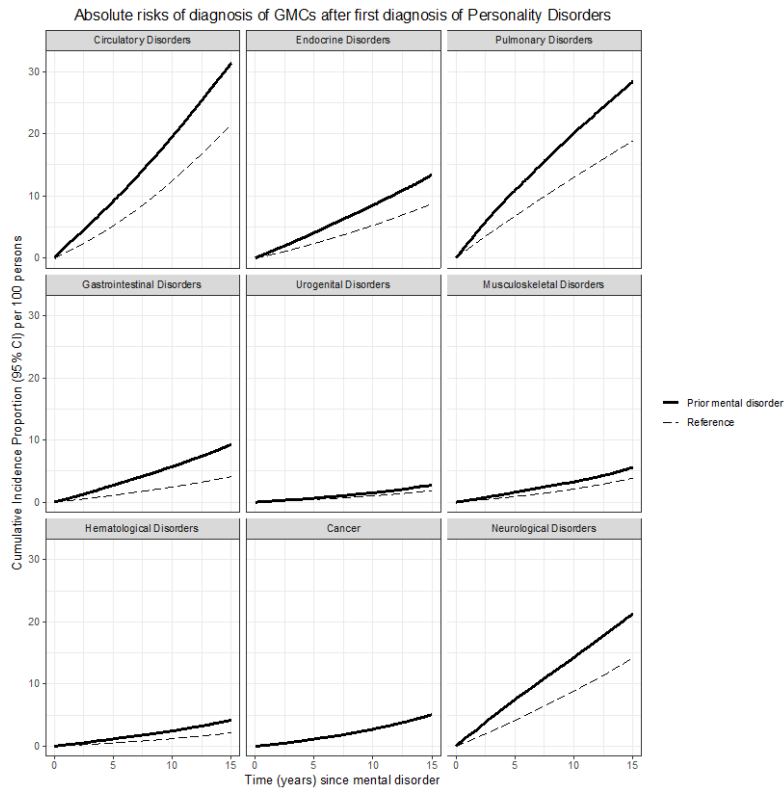

**Figure S70. Absolute risks of being diagnosed with each medical condition after first diagnosis of Intellectual Disabilities**

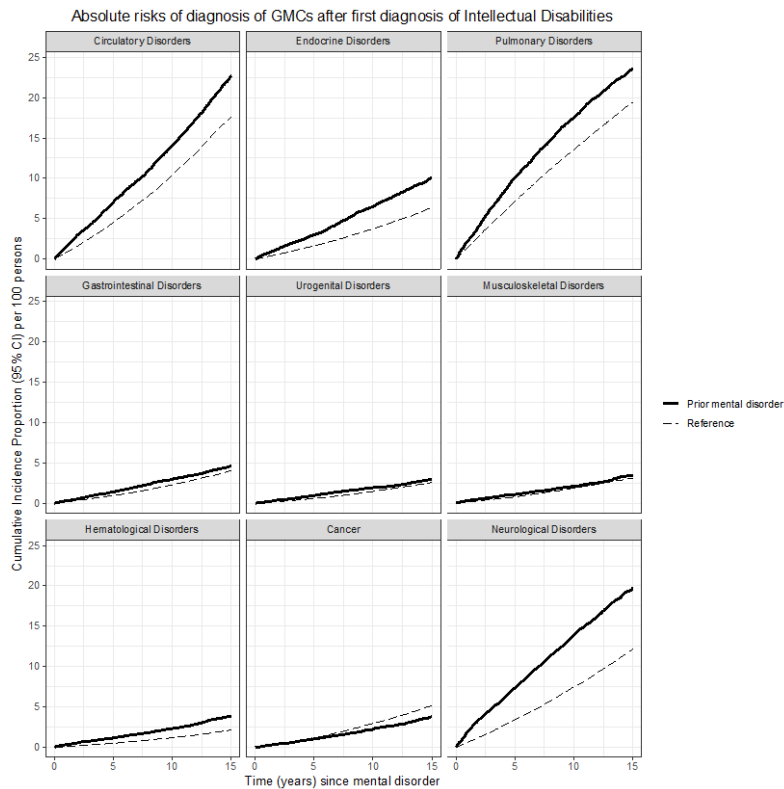

**Figure S71. Absolute risks of being diagnosed with each medical condition after first diagnosis of Developmental Disorders**

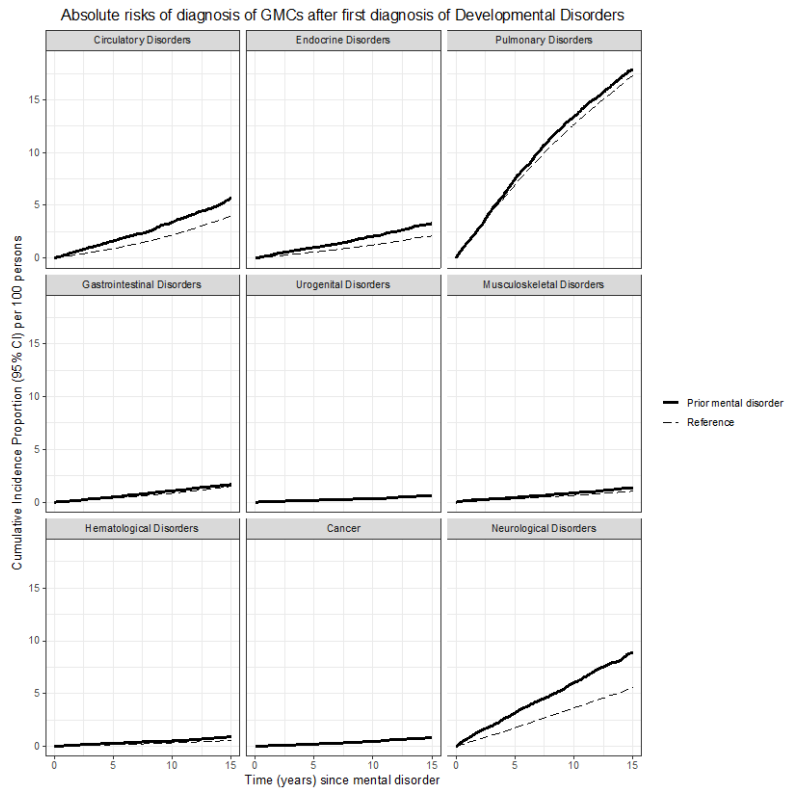

**Figure S72. Absolute risks of being diagnosed with each medical condition after first diagnosis of Behavioral Disorders**

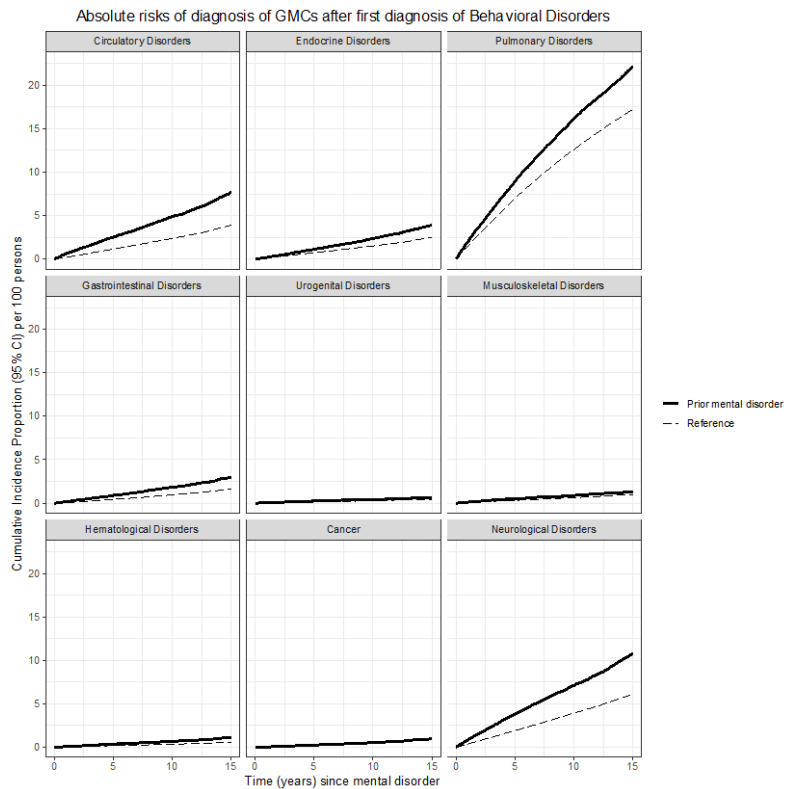



**Figure S73. Sex-specific absolute risks of being diagnosed with each medical condition after first diagnosis of Organic Disorders**

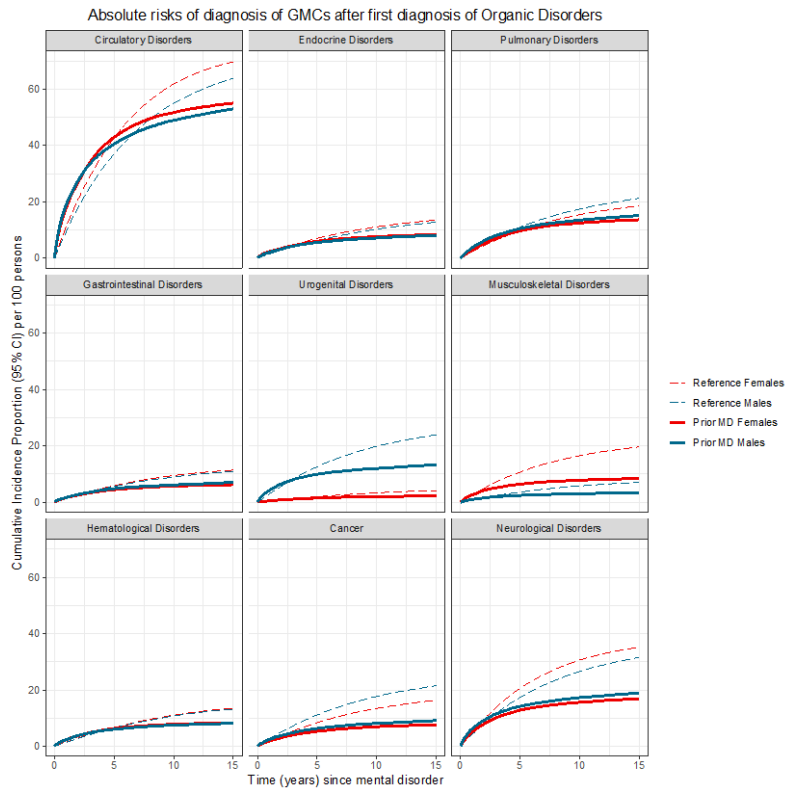

**Figure S74. Sex-specific absolute risks of being diagnosed with each medical condition after first diagnosis of Substance Use Disorders**

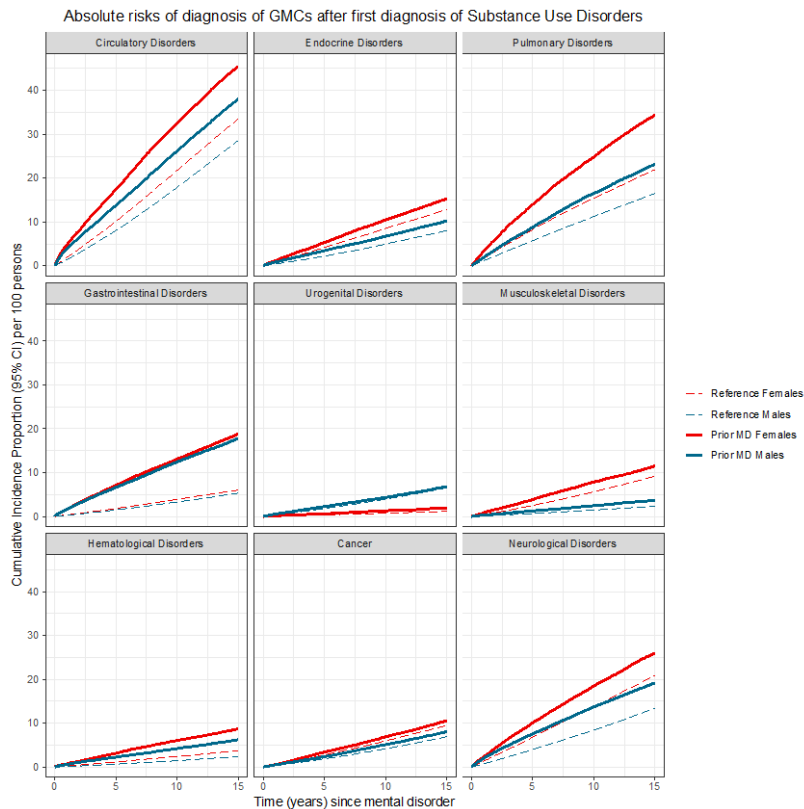

**Figure S75. Sex-specific absolute risks of being diagnosed with each medical condition after first diagnosis of Schizophrenia**

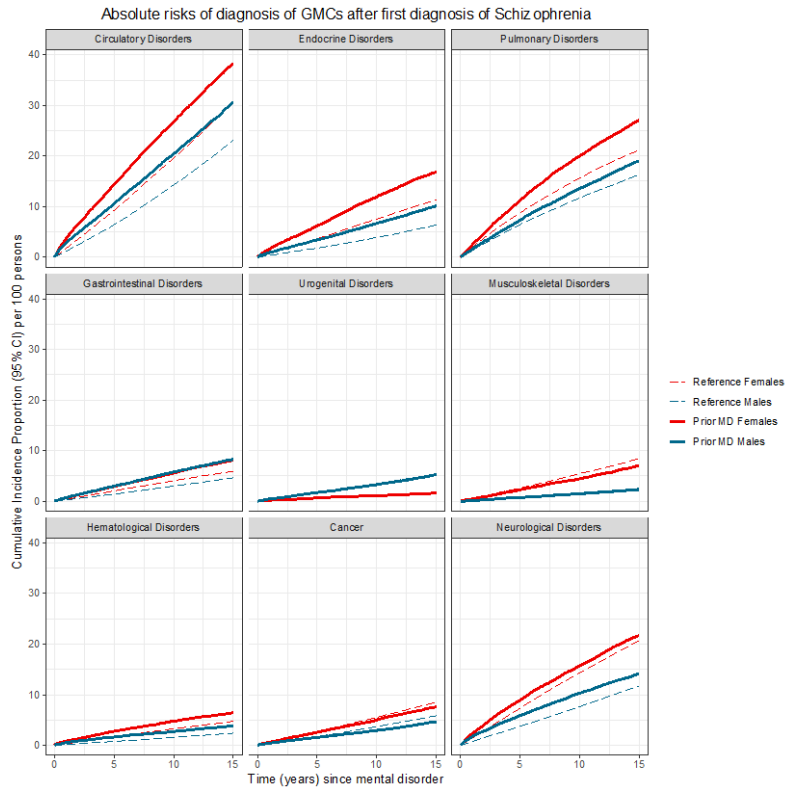

**Figure S76. Sex-specific absolute risks of being diagnosed with each medical condition after first diagnosis of Mood Disorders**

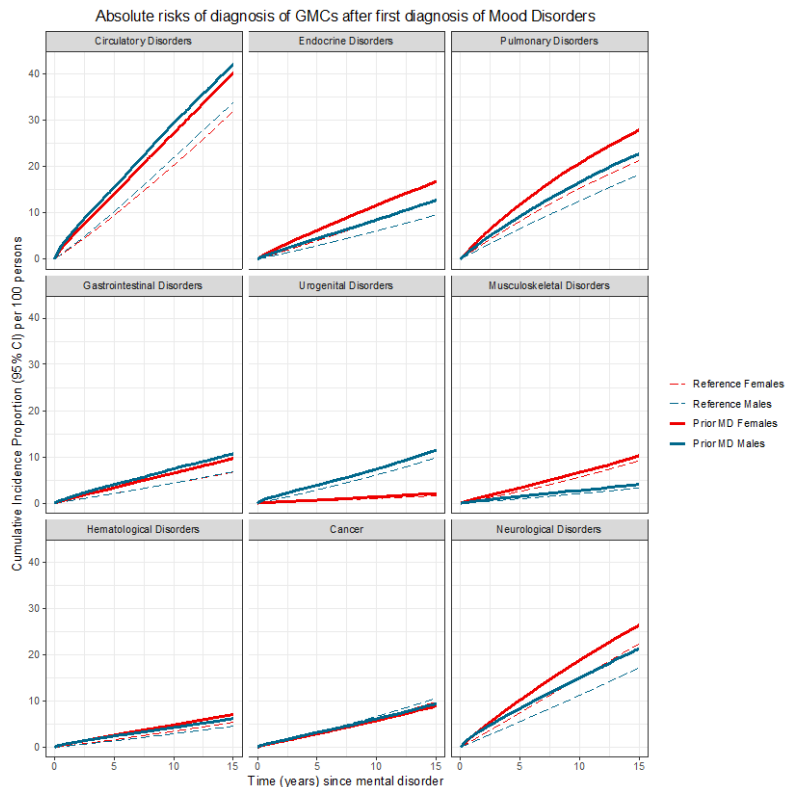

**Figure S77. Sex-specific absolute risks of being diagnosed with each medical condition after first diagnosis of Neurotic Disorders**

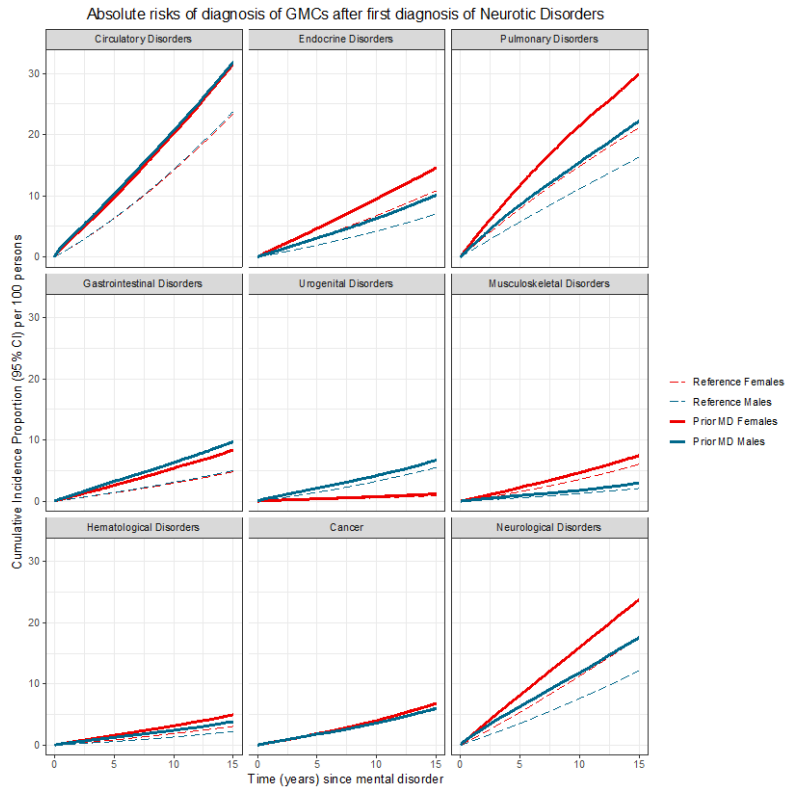

**Figure S78. Sex-specific absolute risks of being diagnosed with each medical condition after first diagnosis of Eating Disorders**

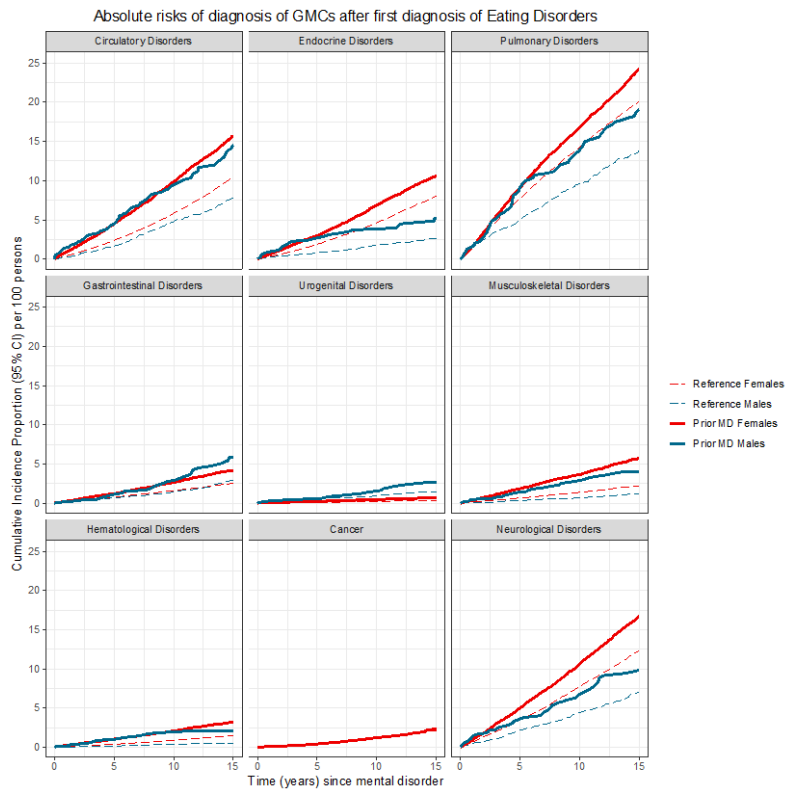

**Figure S79. Sex-specific absolute risks of being diagnosed with each medical condition after first diagnosis of Personality Disorders**

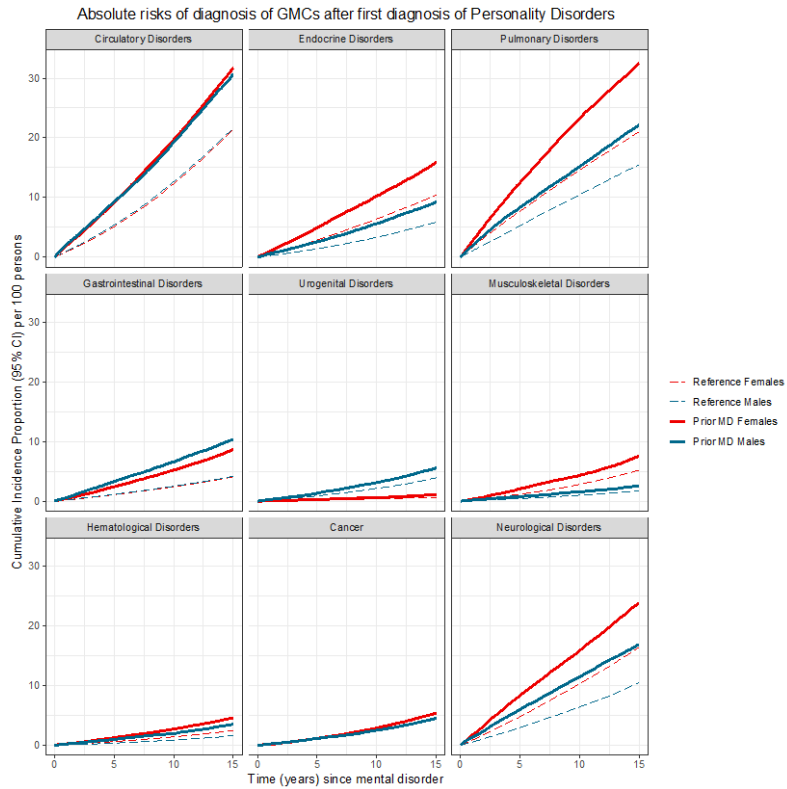

**Figure S80. Sex-specific absolute risks of being diagnosed with each medical condition after first diagnosis of Intellectual Disabilities**

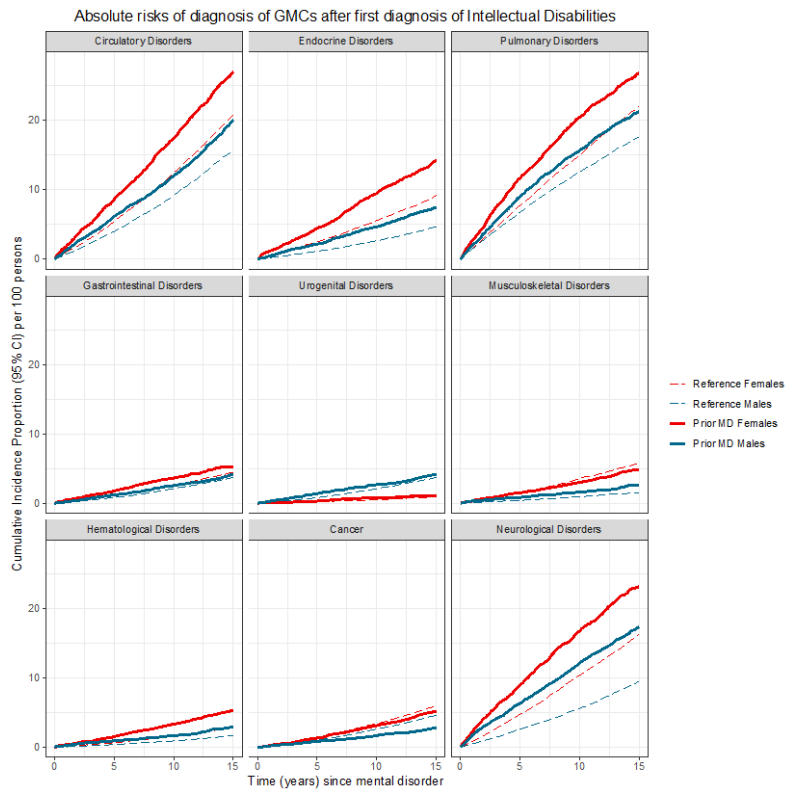

**Figure S81. Sex-specific absolute risks of being diagnosed with each medical condition after first diagnosis of Developmental Disorders**

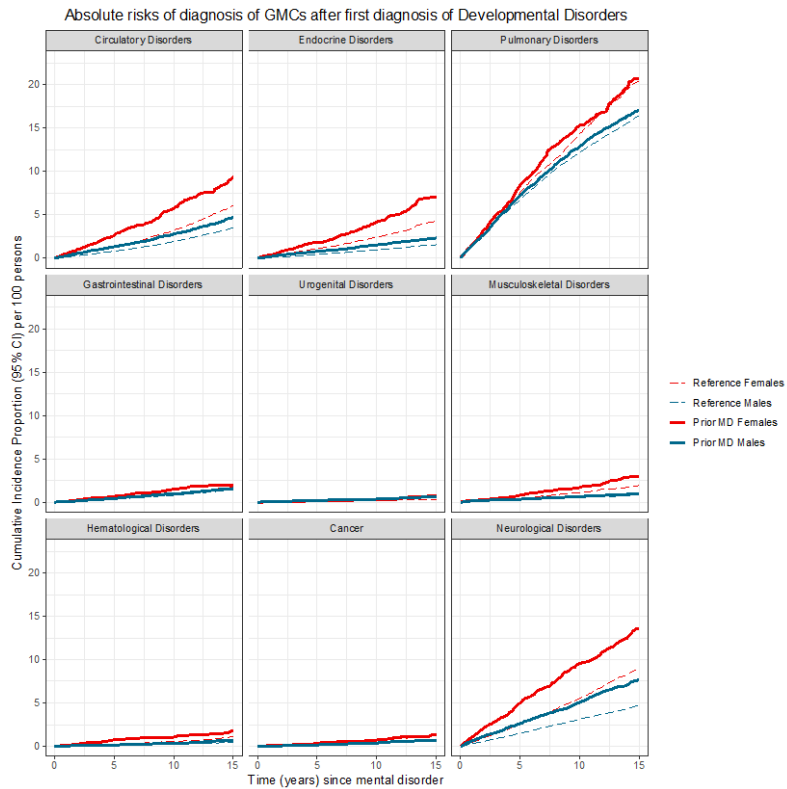

**Figure S82. Sex-specific absolute risks of being diagnosed with each medical condition after first diagnosis of Behavioral Disorders**

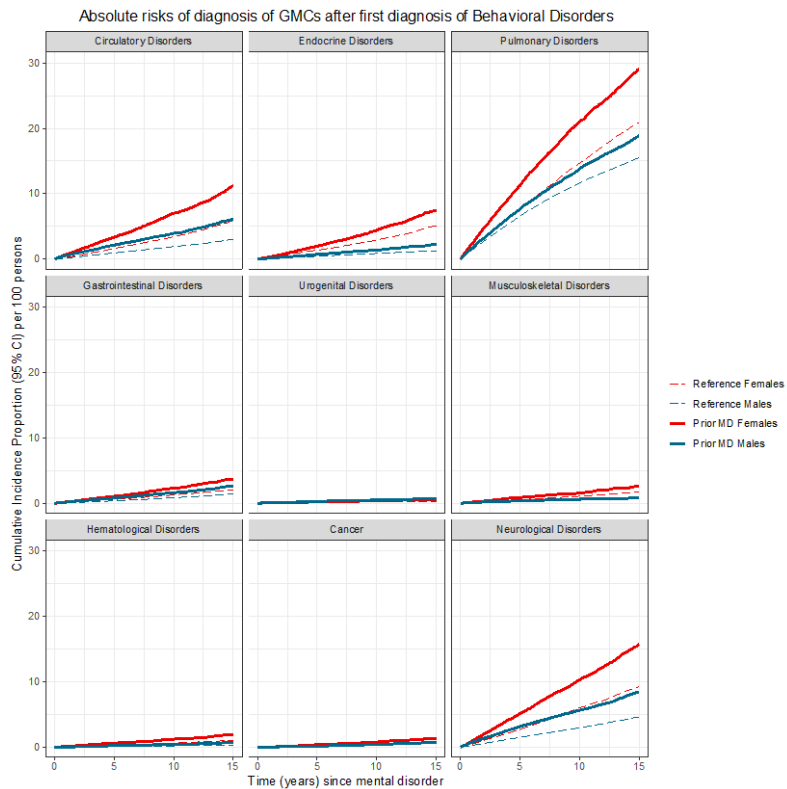

**Figures S83-S102. Absolute risks of general medical condition categories after diagnosis of mental disorders, depending on age at first onset of the mental disorder**

The following set of figures shows the sex- and time-specific absolute risks of being diagnosed with all medical conditions after being previously diagnosed with one of the mental disorders, depending on age at first diagnosis of the mental disorder. They show the cumulative incidence proportions (CIPs) and 95% confidence intervals (shaded area) estimated across all ages of being diagnosed with each medical condition (shown as label at the top of each panel). Each person diagnosed with specific mental disorder was matched to up to five 'reference individuals' of the same sex and born within 30 days of them.

For each mental disorder-medical condition pair, graphs are provided to show all persons (black lines) and sex-specific CIPs (blue lines for males and red for females). CIPs are displayed for those who were diagnosed with specific mental disorder from the time of diagnosis (solid bold line in the respective colours) and the reference group (dashed line in the respective colours). Confidence intervals are displayed only for those with prior mental disorders, as confidence intervals for the reference group will be proportional to those for people with prior mental disorders, but smaller. In some cases, 95% CIs are too small to be visible.

The horizontal axes show the time since first diagnosis of the mental disorder (or since diagnosis of the person the reference individuals were matched to). The vertical axes show the cumulative incidence proportions and 95% CIs (note these axes vary for each set of graphs).

Estimates with fewer than 50 persons at risk or fewer than 15 cases are not shown, but blank 'place-holder' graphs are displayed to indicate that estimates do not appear due to lack of numbers. Where numbers were too small to show CIPs for those with mental disorders, reference CIPs are not displayed either.

*Displaying estimates for all persons*

*The y-axis varies for each graph, however they range from 0 to a maximum of 71*

- S83. Organic Disorders
- S84. Substance Use Disorders
- S85. Schizophrenia
- S86. Mood Disorders
- S87. Neurotic Disorders
- S88. Eating Disorders
- S89. Personality Disorders
- S90. Intellectual Disorders
- S91. Developmental Disorders
- S92. Behavioral Disorders

*Displaying sex-specific estimates*

*The y-axis varies for each graph, however they range from 0 to a maximum of 68*

- S93. Organic Disorders
- S94. Substance Use Disorders
- S95. Schizophrenia
- S96. Mood Disorders
- S97. Neurotic Disorders
- S98. Eating Disorders
- S99. Personality Disorders
- S100. Intellectual Disorders
- S101. Developmental Disorders
- S102. Behavioral Disorders

**Figures S83.1-S83.9. Absolute risks of being diagnosed with general medical conditions after first diagnosis of Organic Disorders**

**Figure S83.1 – Circulatory Conditions**

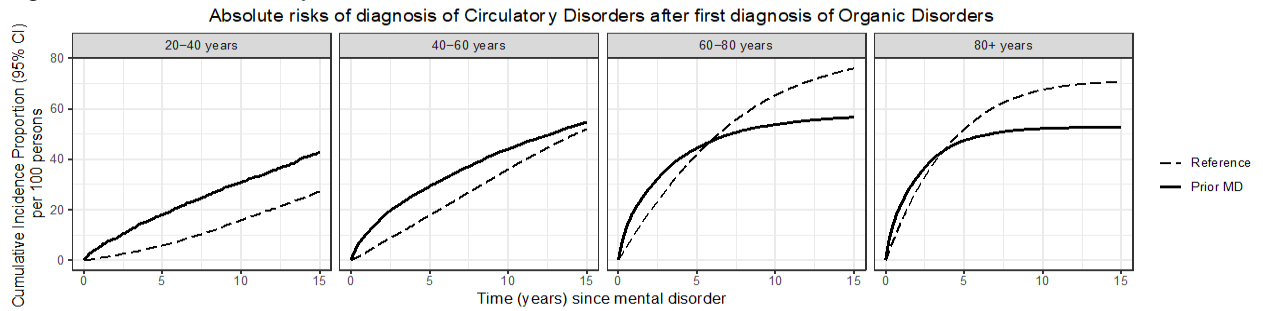

**Figure S83.2 – Endocrine Conditions**

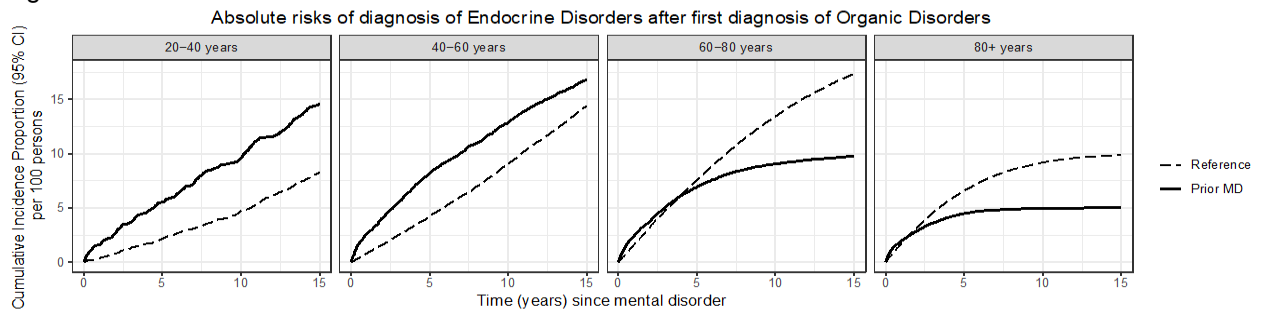

**Figure S83.3 – Pulmonary Conditions**

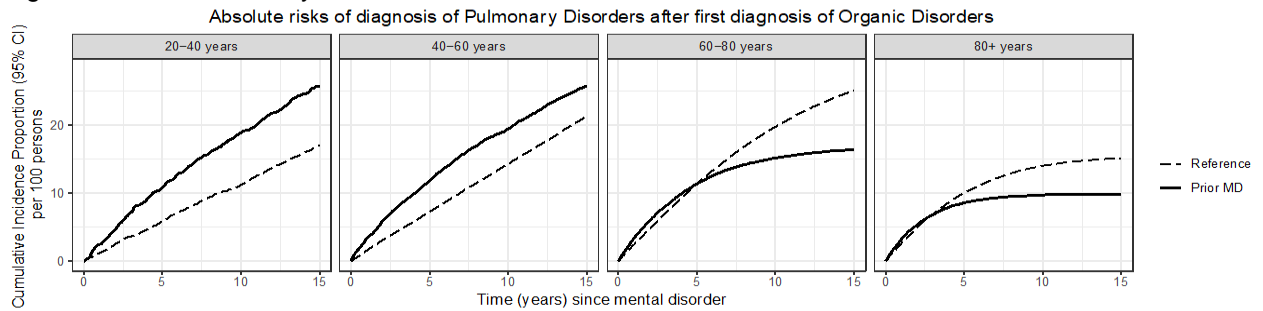

**Figure S83.4 – Gastrointestinal Conditions**

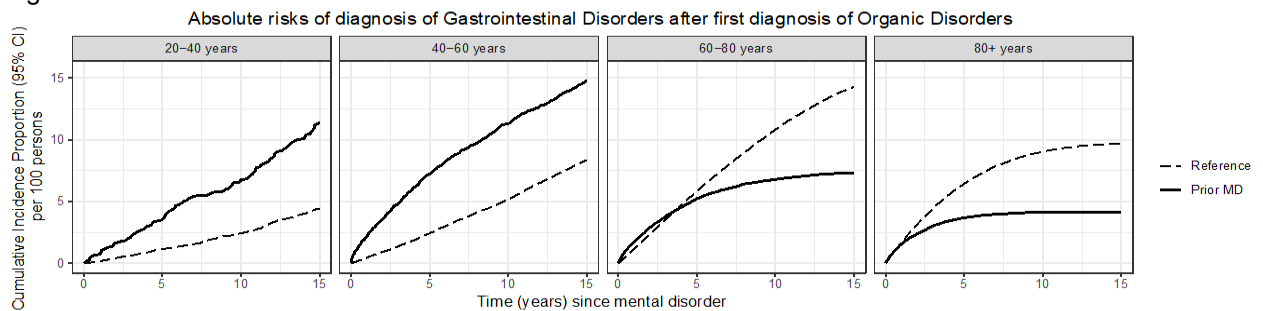

Figure S83.5 – Urogenital Conditions

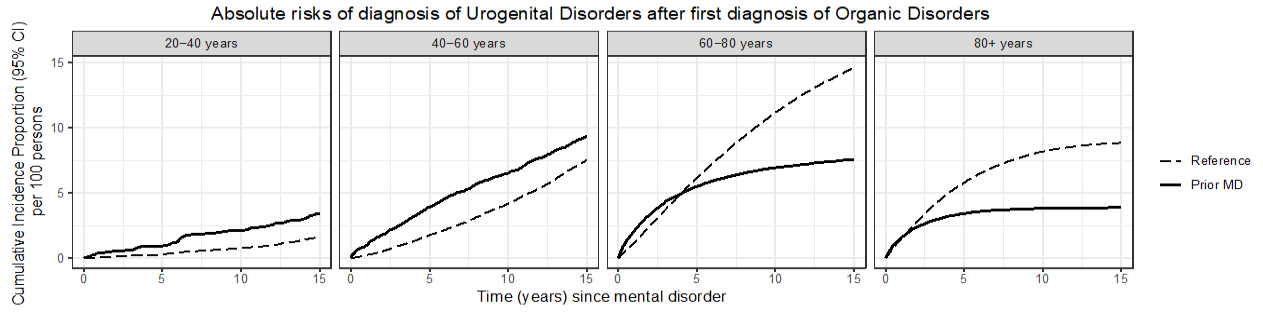

Figure S83.6 – Musculoskeletal Conditions

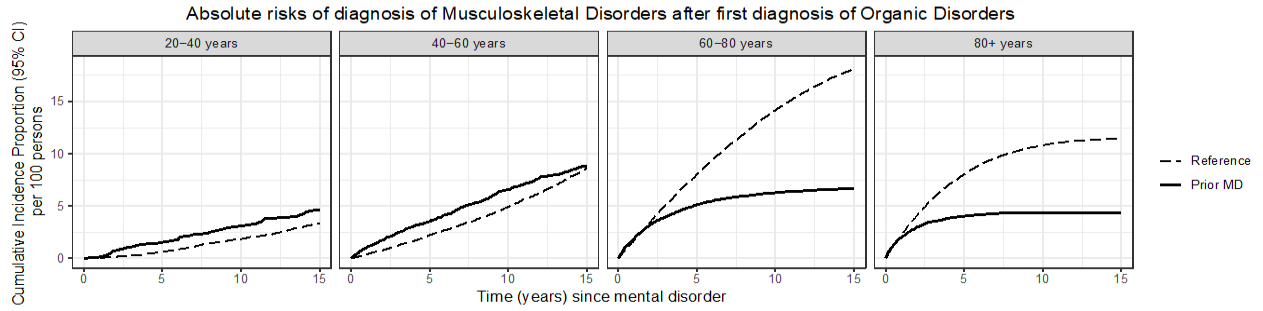

Figure S83.7 – Hematological Conditions

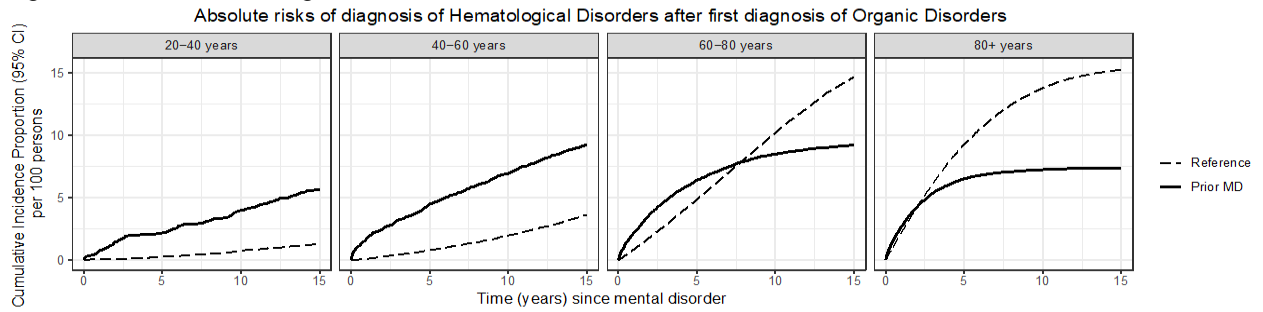

Figure S83.8 – Cancers

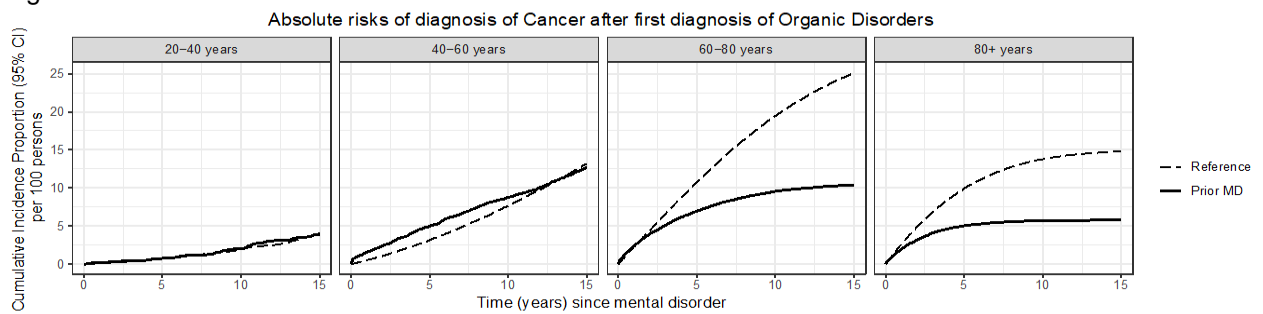

Figure S83.9 – Neurological Conditions

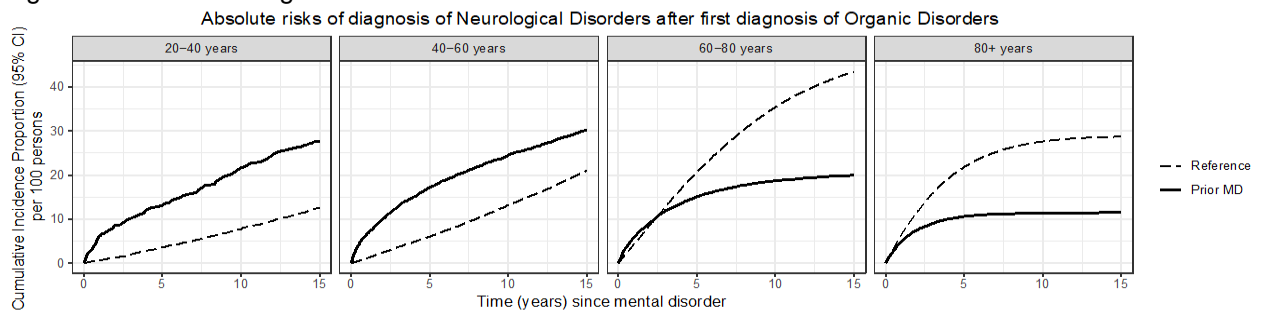



**Figures S84.1-S84.9. Absolute risks of being diagnosed with general medical conditions after first diagnosis of Substance Use Disorders**

**Figure S84.1 – Circulatory Conditions**

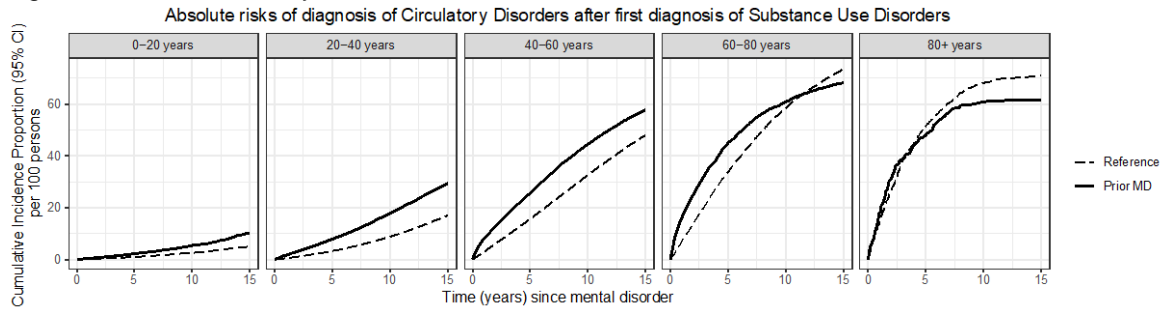

**Figure S84.2 – Endocrine Conditions**

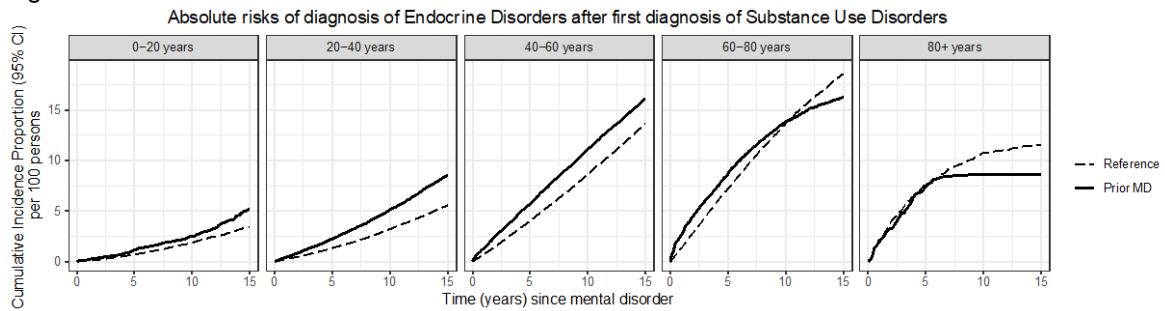

**Figure S84.3 – Pulmonary Conditions**

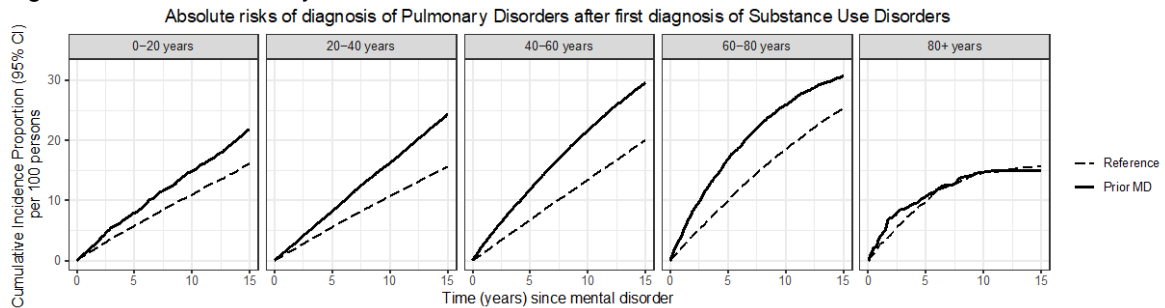

**Figure S84.4 – Gastrointestinal Conditions**

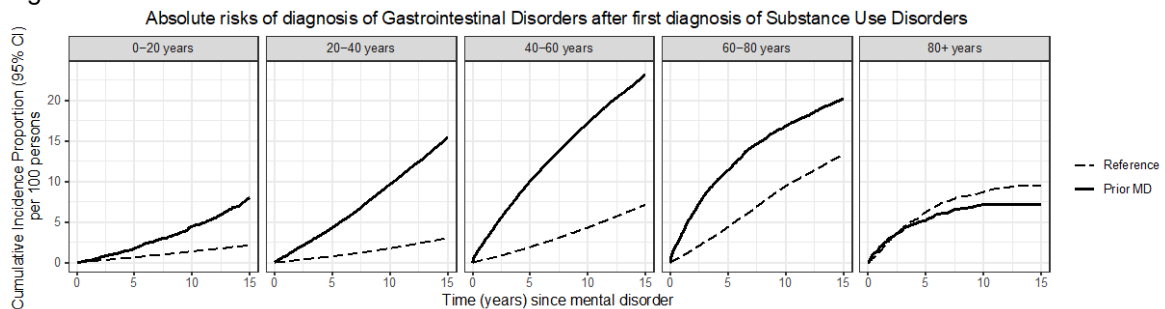

Figure S84.5 – Urogenital Conditions

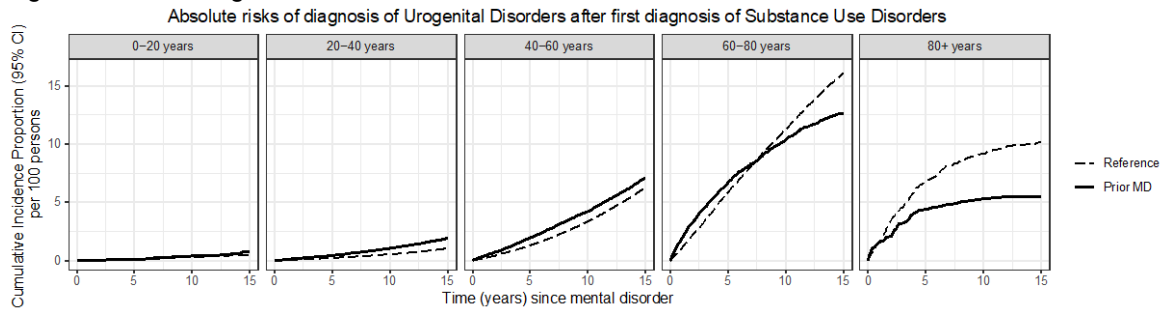

Figure S84.6 – Musculoskeletal Conditions

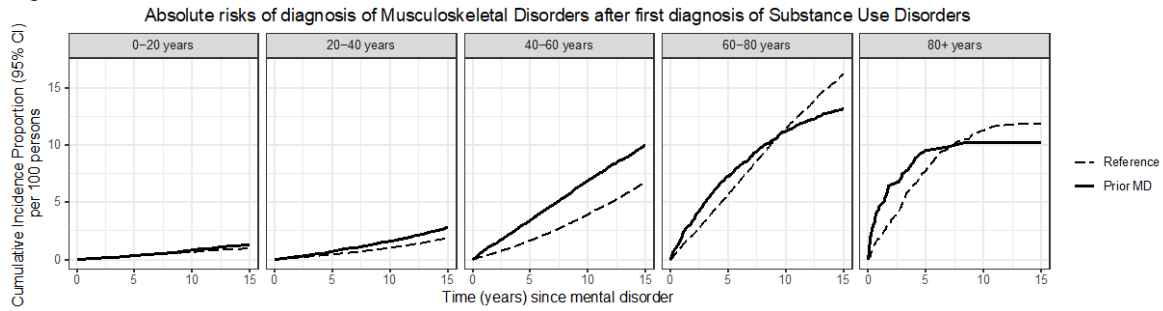

Figure S84.7 – Hematological Conditions

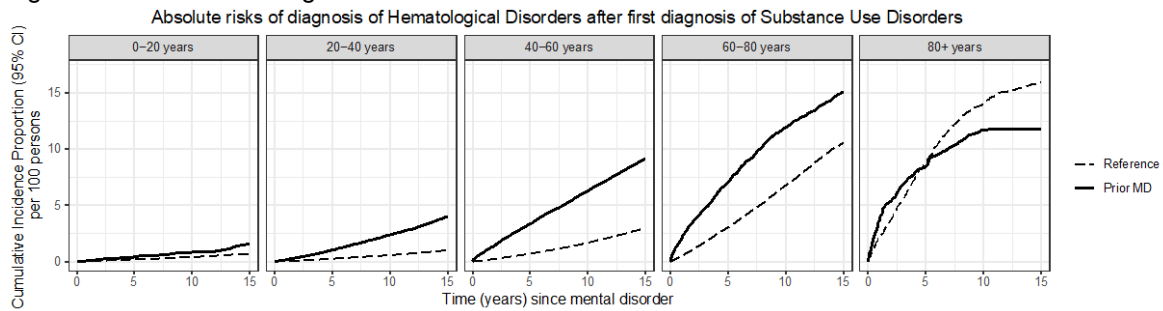

Figure S84.8 – Cancers

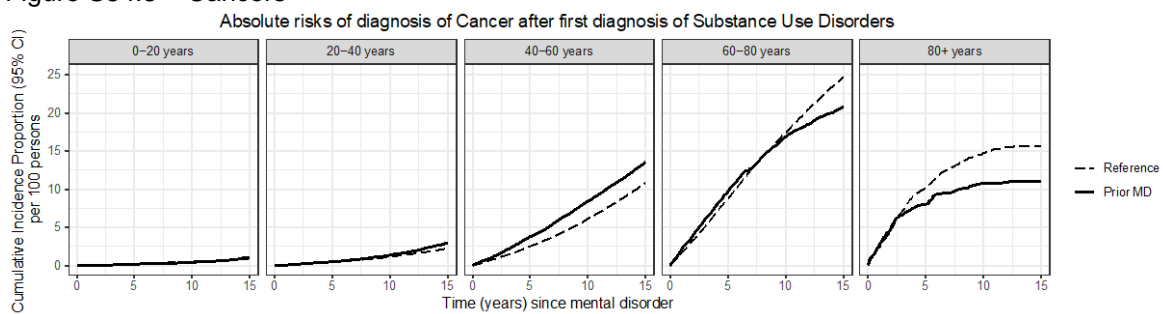

Figure S84.9 – Neurological Conditions

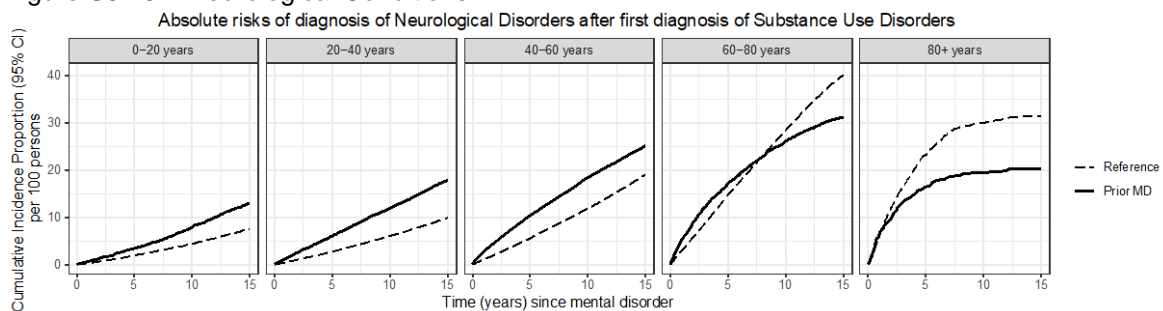

**Figures S85.1-S85.9. Absolute risks of being diagnosed with general medical conditions after first diagnosis of Schizophrenia**

**Figure S85.1 – Circulatory Conditions**

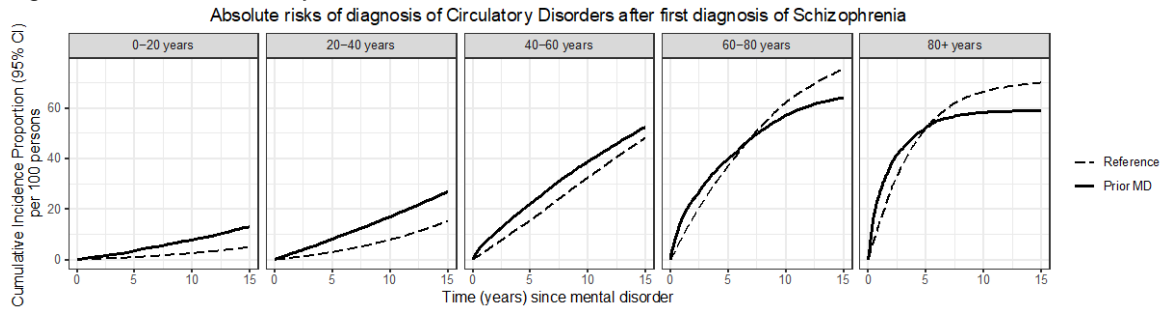

**Figure S85.2 – Endocrine Conditions**

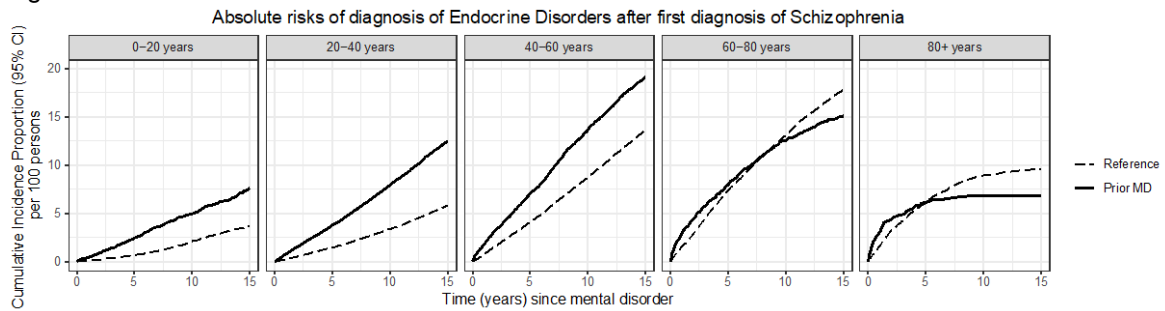

**Figure S85.3 – Pulmonary Conditions**

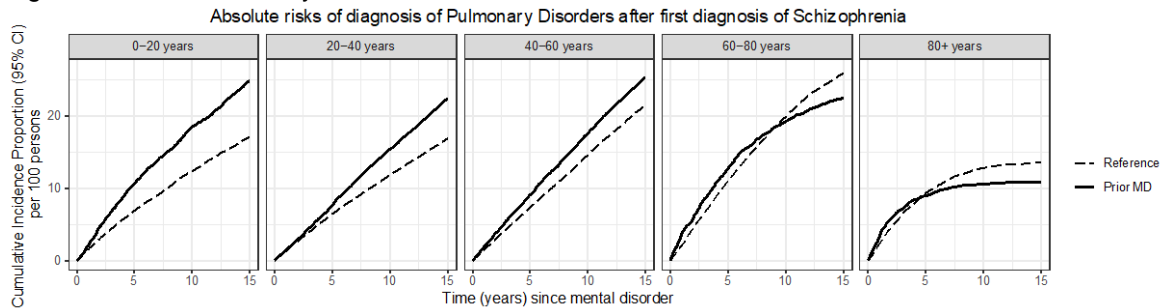

**Figure S85.4 – Gastrointestinal Conditions**

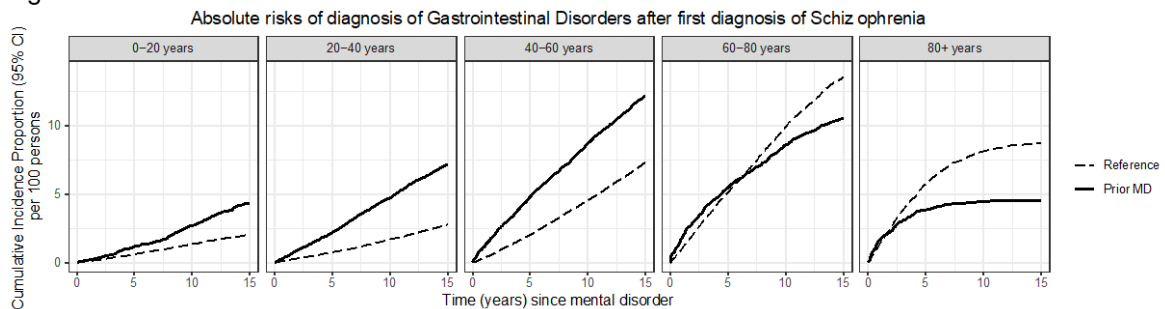

Figure S85.5 – Urogenital Conditions

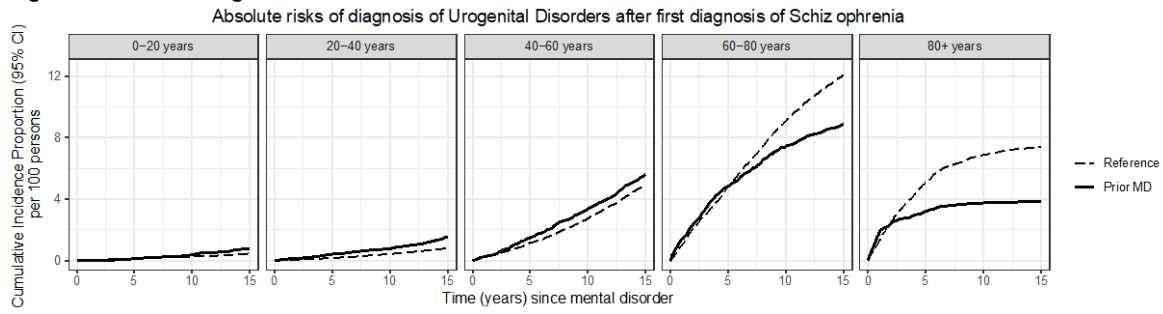

Figure S85.6 – Musculoskeletal Conditions

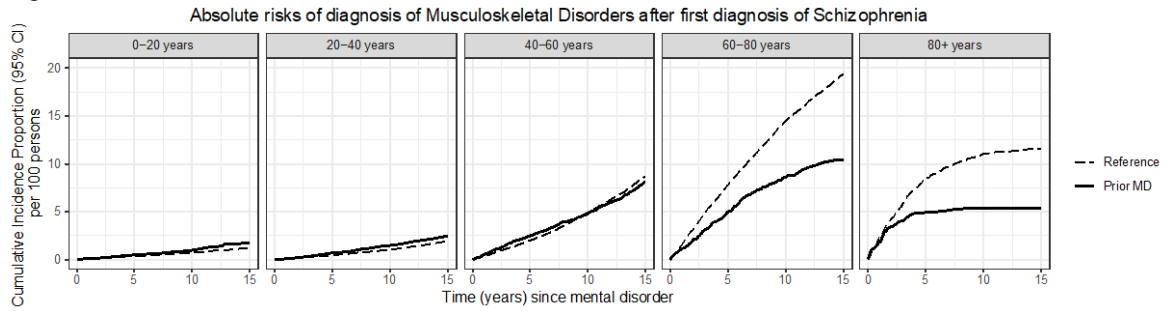

Figure S85.7 – Hematological Conditions

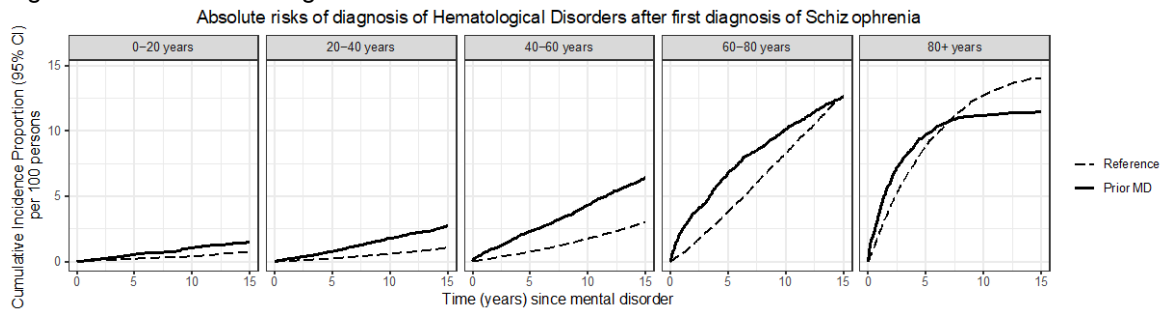

Figure S85.8 – Cancers

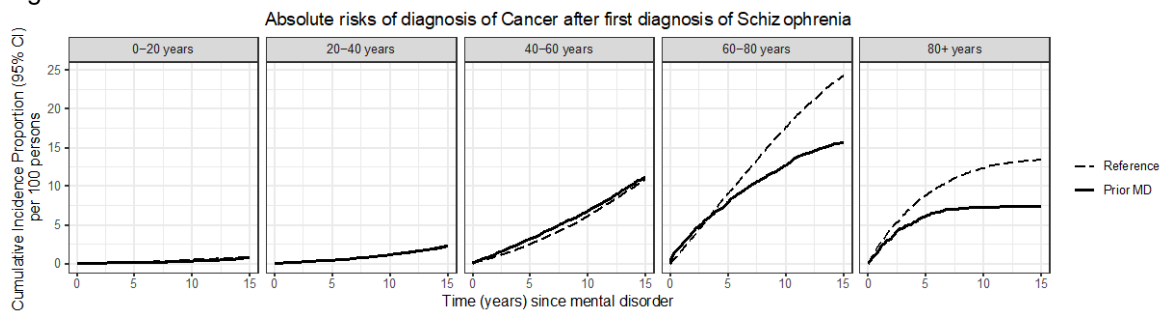

Figure S85.9 – Neurological Conditions

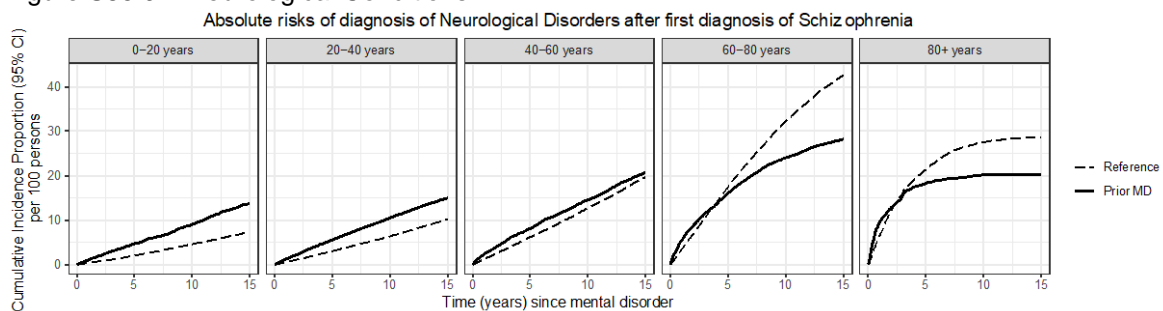

**Figures S86.1-S86.9. Absolute risks of being diagnosed with general medical conditions after first diagnosis of Mood Disorders**

**Figure S86.1 – Circulatory Conditions**

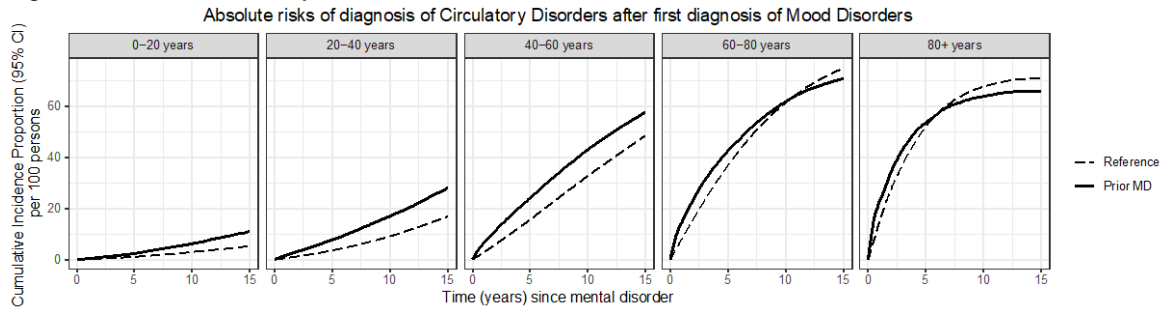

**Figure S86.2 – Endocrine Conditions**

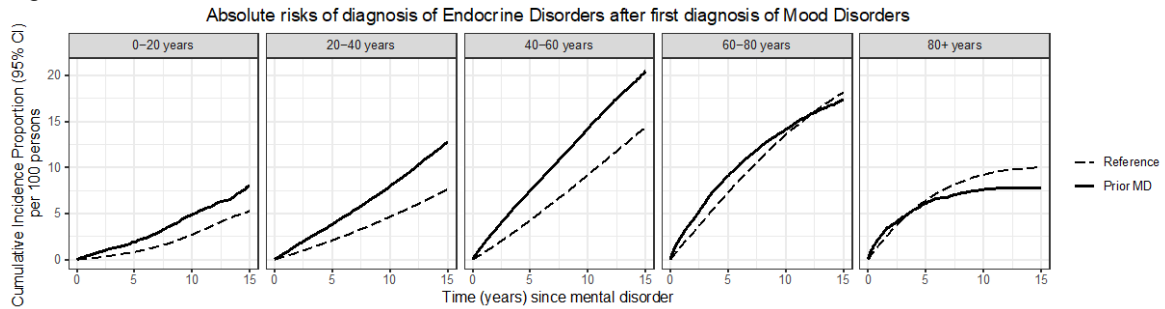

**Figure S86.3 – Pulmonary Conditions**

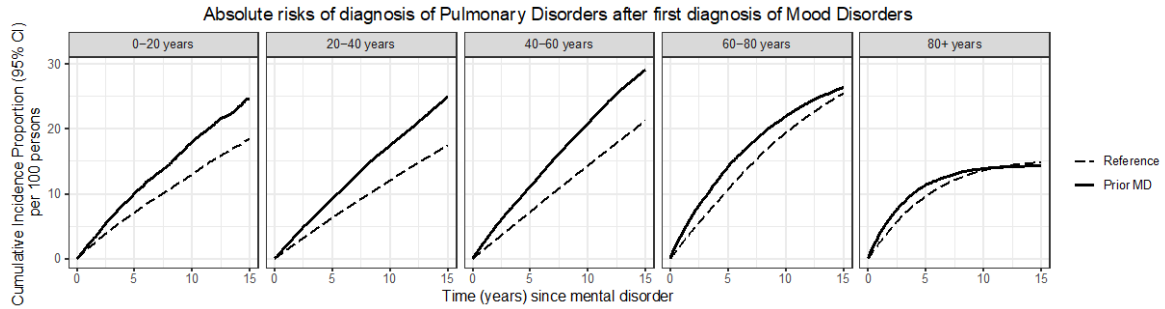

**Figure S86.4 – Gastrointestinal Conditions**

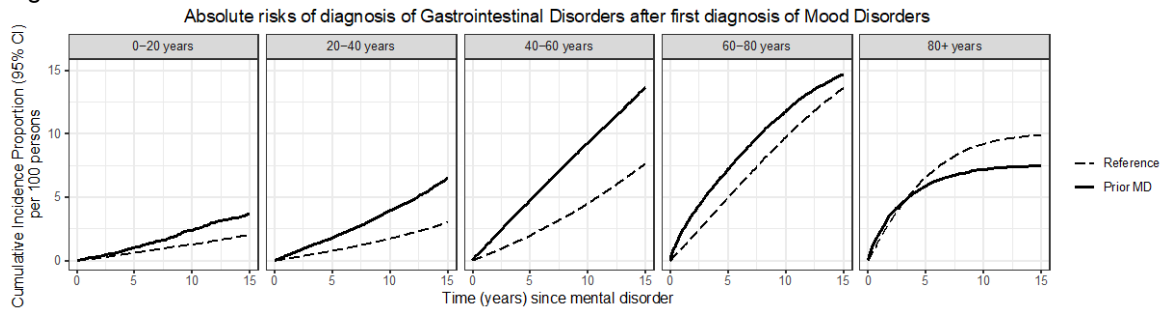

Figure S86.5 – Urogenital Conditions

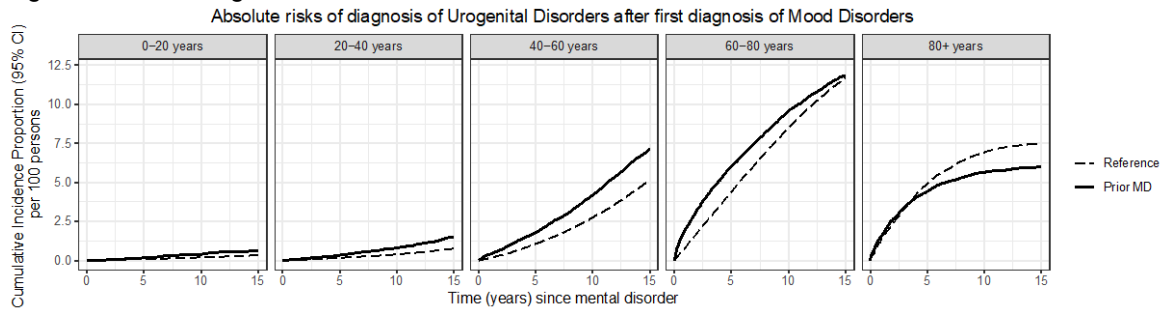

Figure S86.6 – Musculoskeletal Conditions

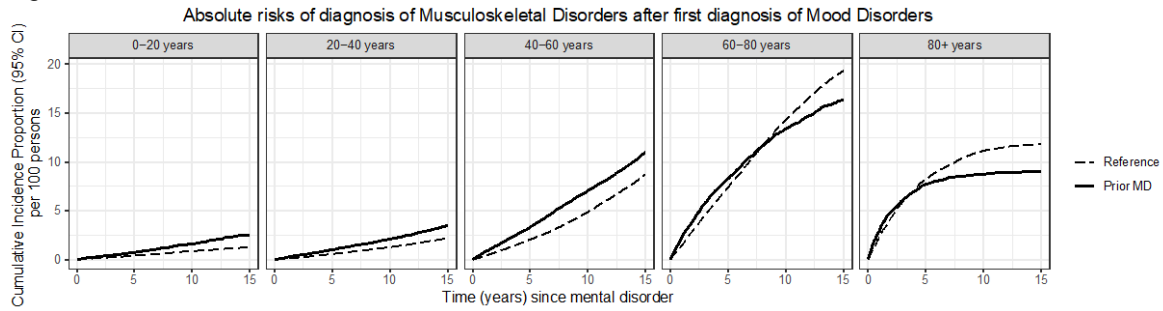

Figure S86.7 – Hematological Conditions

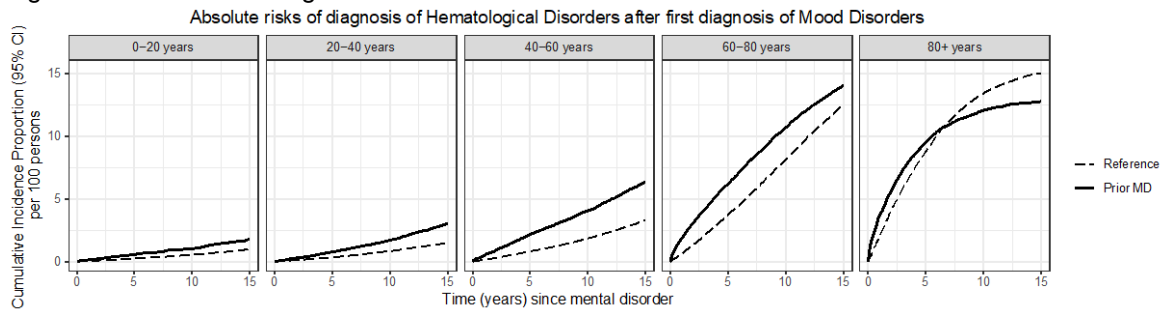

Figure S86.8 – Cancers

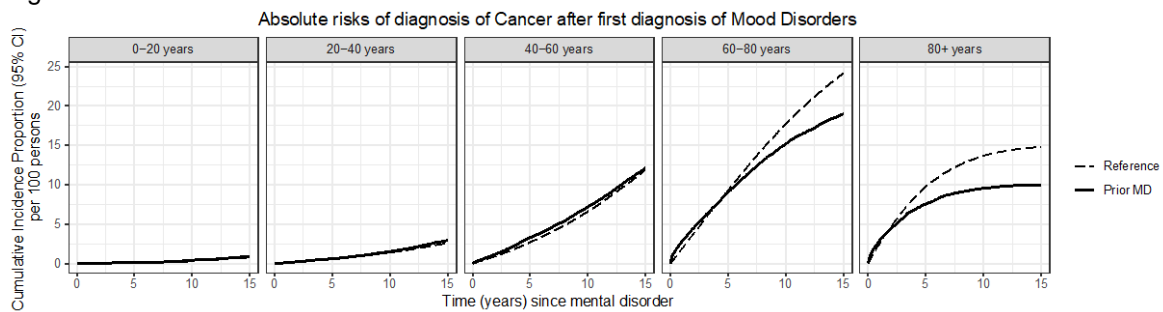

Figure S86.9 – Neurological Conditions

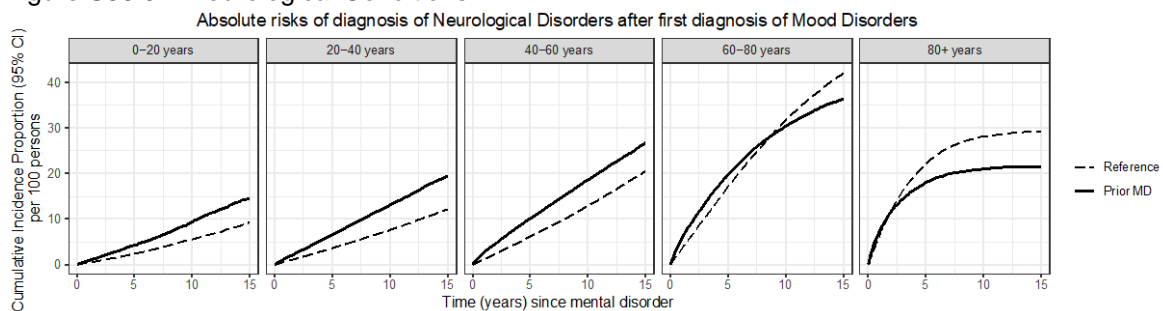

**Figures S87.1-S87.9. Absolute risks of being diagnosed with general medical conditions after first diagnosis of Neurotic Disorders.**

**Figure S87.1 – Circulatory Conditions**

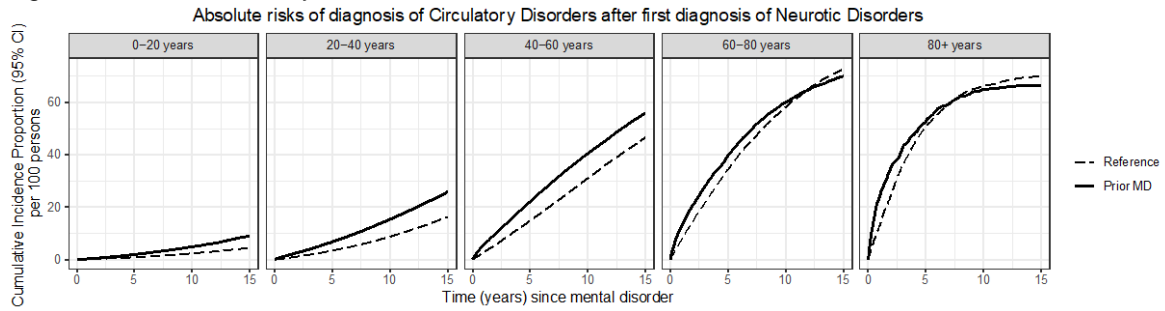

**Figure S87.2 – Endocrine Conditions**

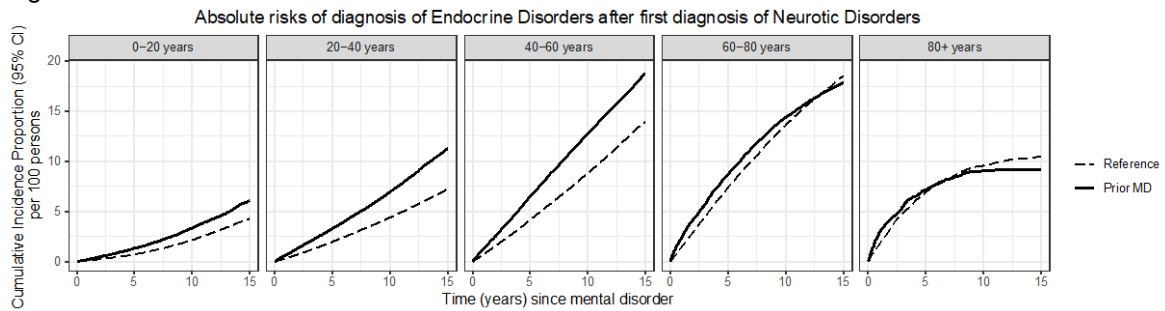

**Figure S87.3 – Pulmonary Conditions**

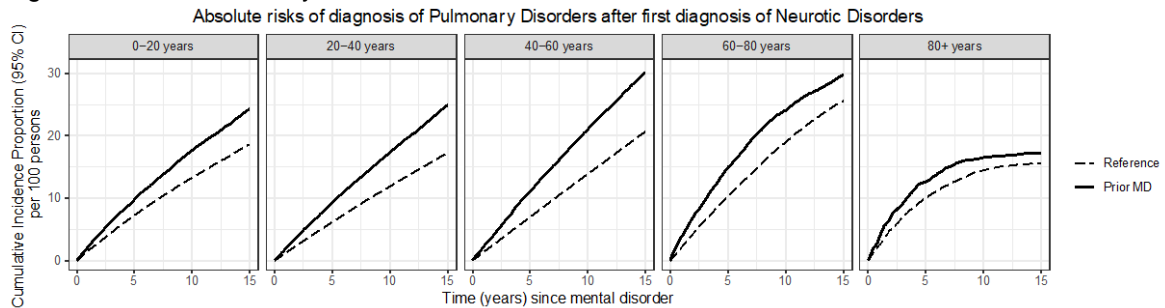

**Figure S87.4 – Gastrointestinal Conditions**

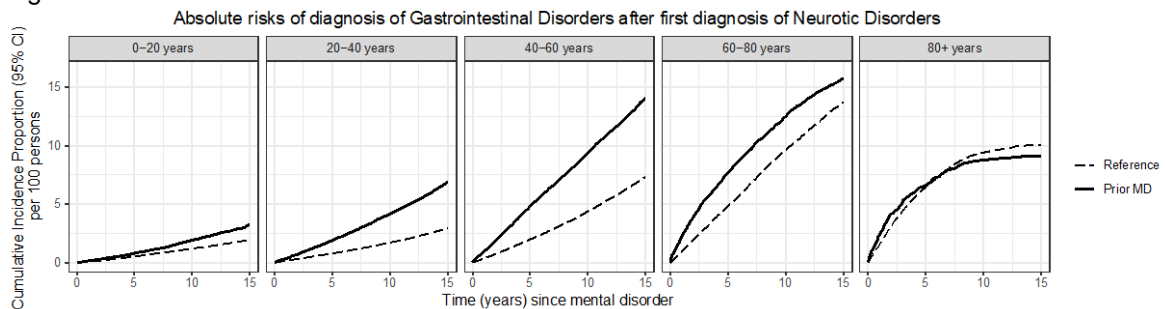

**Figure S87.5 – Urogenital Conditions**

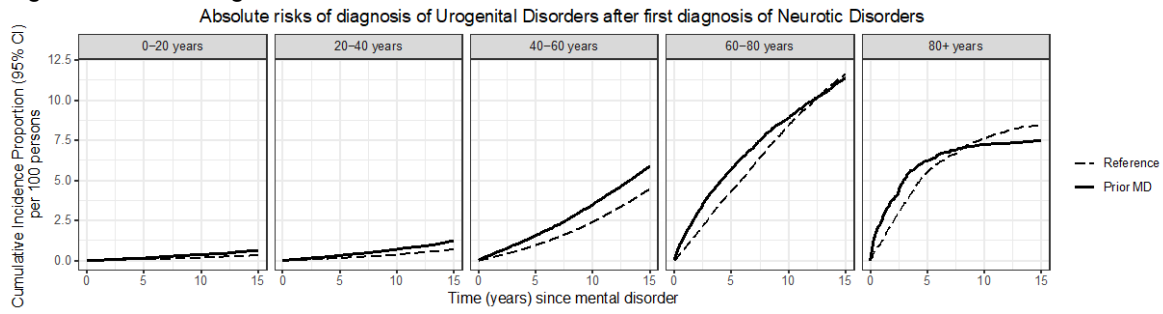

**Figure S87.6 – Musculoskeletal Conditions**

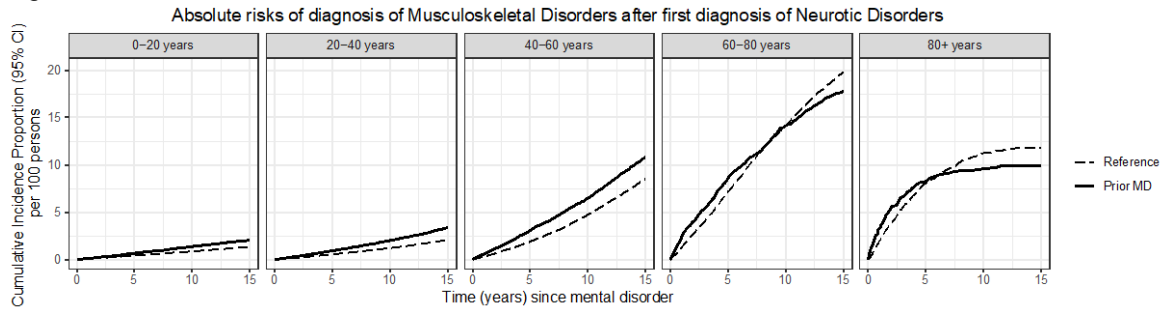

**Figure S87.7 – Hematological Conditions**

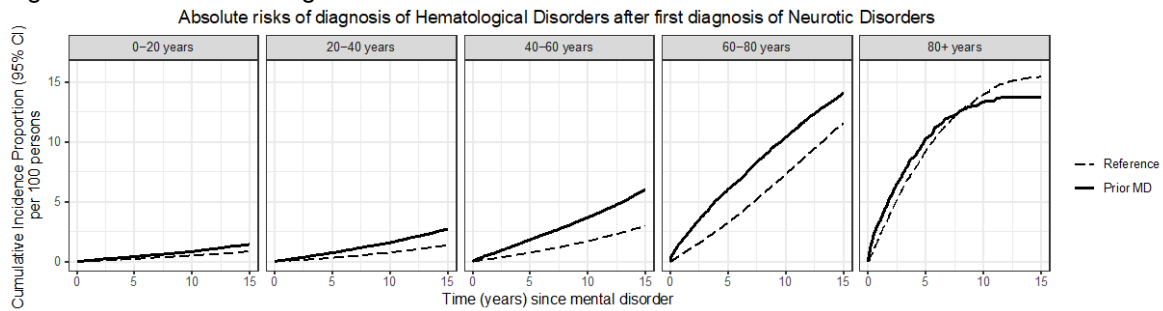

**Figure S87.8 – Cancers**

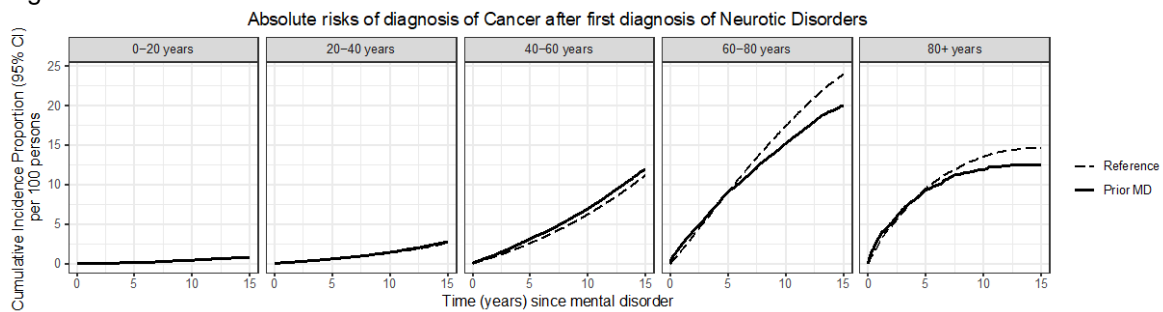

**Figure S87.9 – Neurological Conditions**

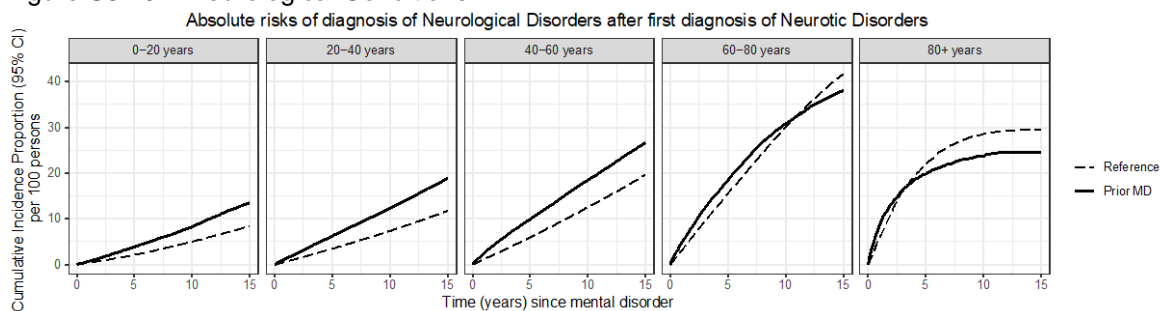



**Figures S88.1-S88.9. Absolute risks of being diagnosed with general medical conditions after first diagnosis of Eating Disorders.**

**Figure S88.1 – Circulatory Conditions**

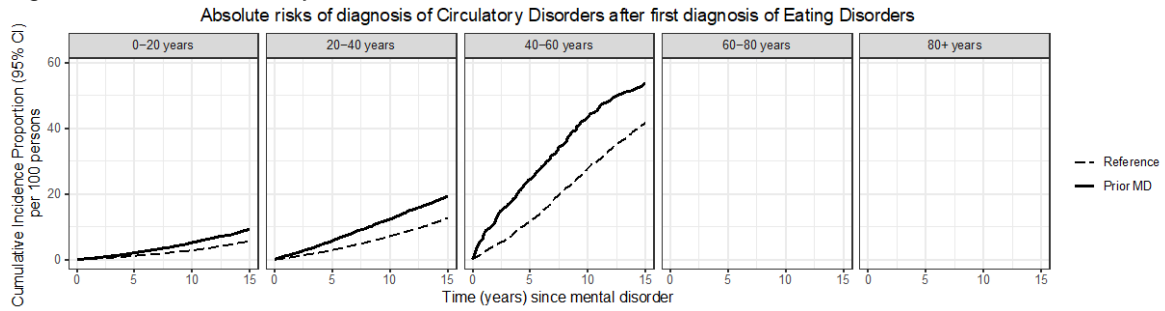

**Figure S88.2 – Endocrine Conditions**

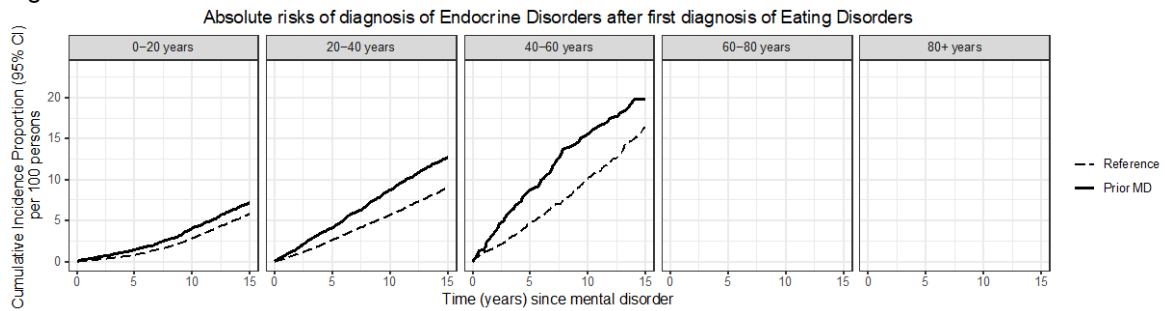

**Figure S88.3 – Pulmonary Conditions**

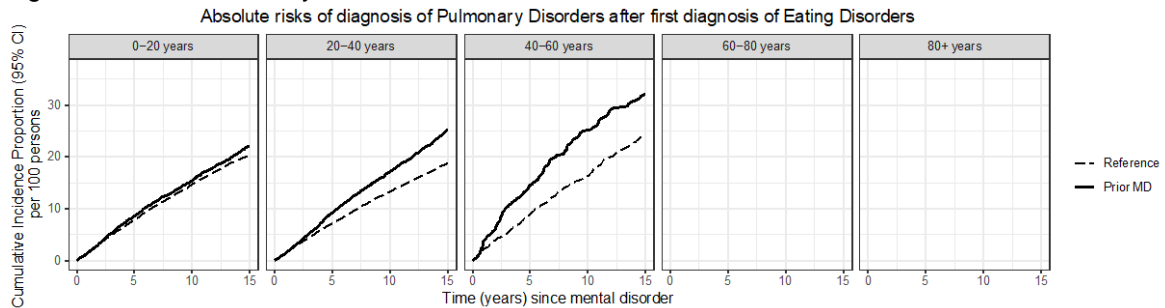

**Figure S88.4 – Gastrointestinal Conditions**

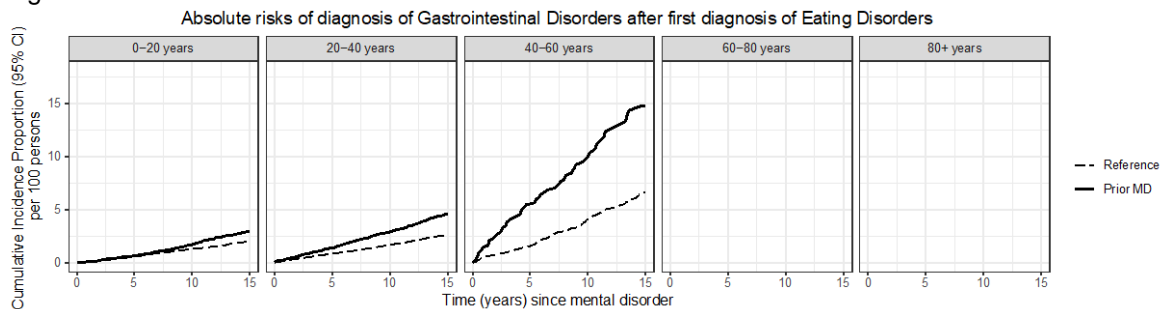

Figure S88.5 – Urogenital Conditions

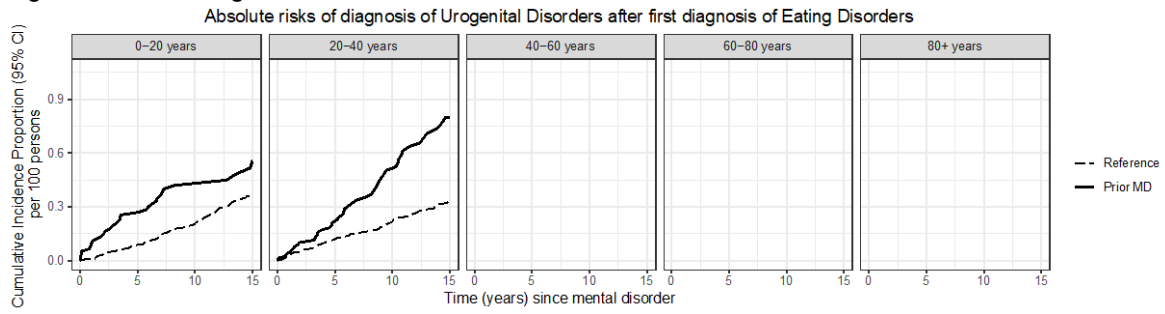

Figure S88.6 – Musculoskeletal Conditions

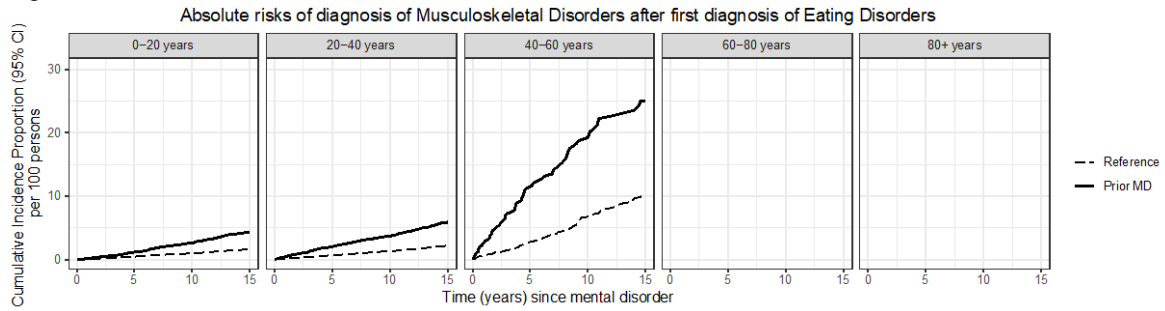

Figure S88.7 – Hematological Conditions

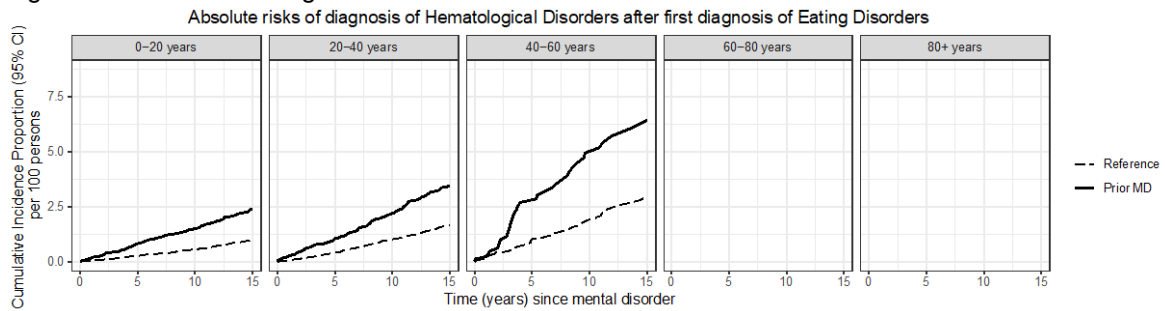

Figure S88.8 – Cancers

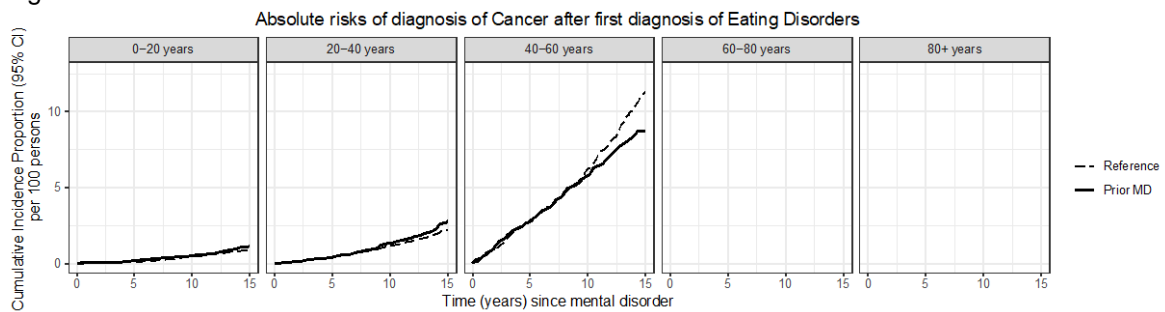

Figure S88.9 – Neurological Conditions

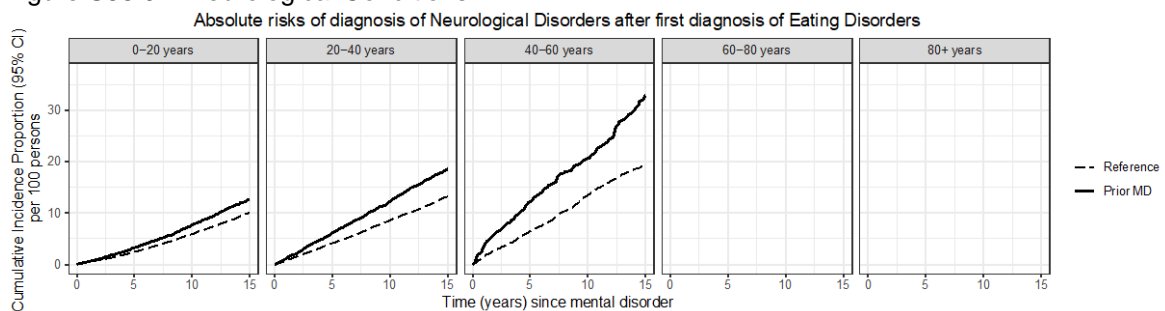

**Figures S89.1-S89.9. Absolute risks of being diagnosed with general medical conditions after first diagnosis of Personality Disorder.**

**Figure S89.1 – Circulatory Conditions**

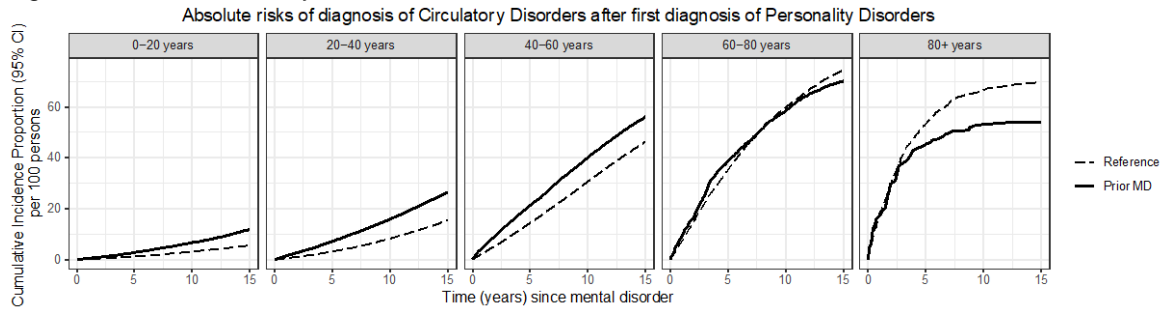

**Figure S89.2 – Endocrine Conditions**

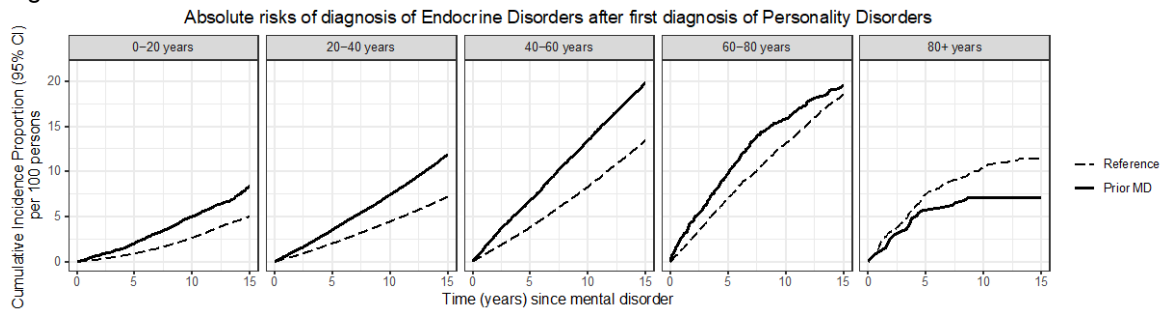

**Figure S89.3 – Pulmonary Conditions**

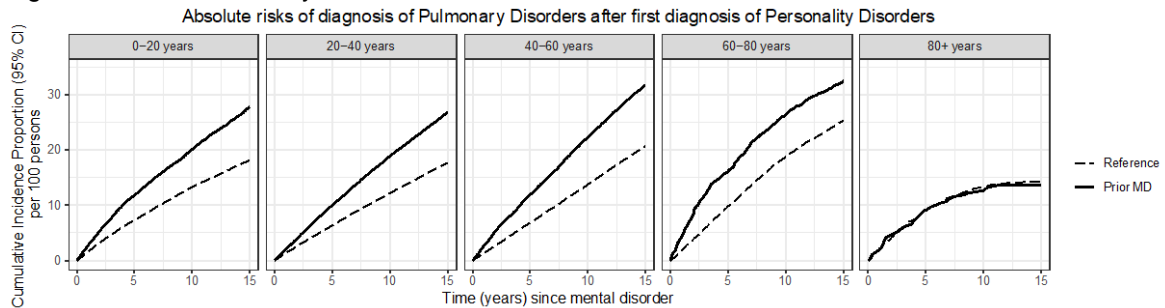

**Figure S89.4 – Gastrointestinal Conditions**

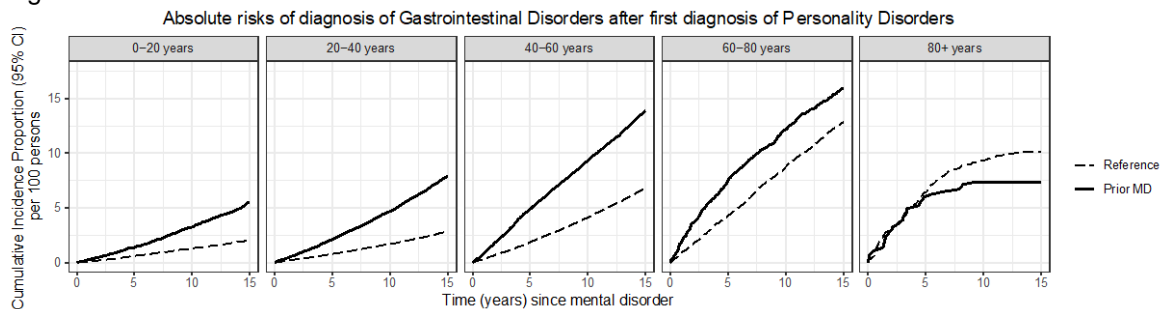

Figure S89.5 – Urogenital Conditions

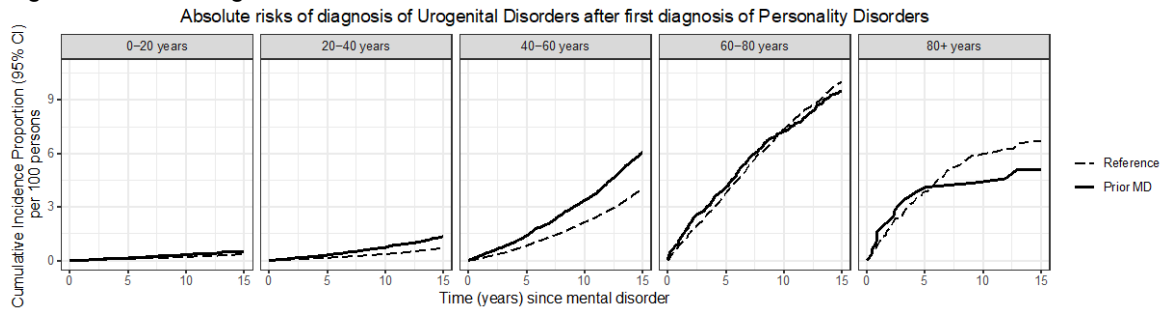

Figure S89.6 – Musculoskeletal Conditions

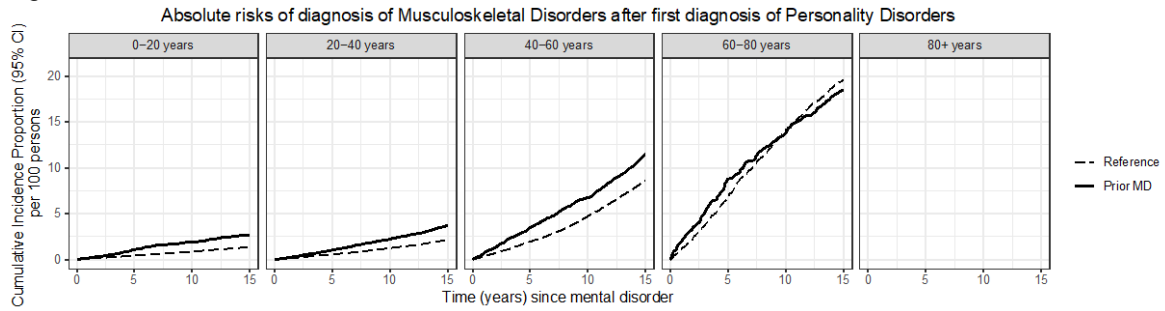

Figure S89.7 – Hematological Conditions

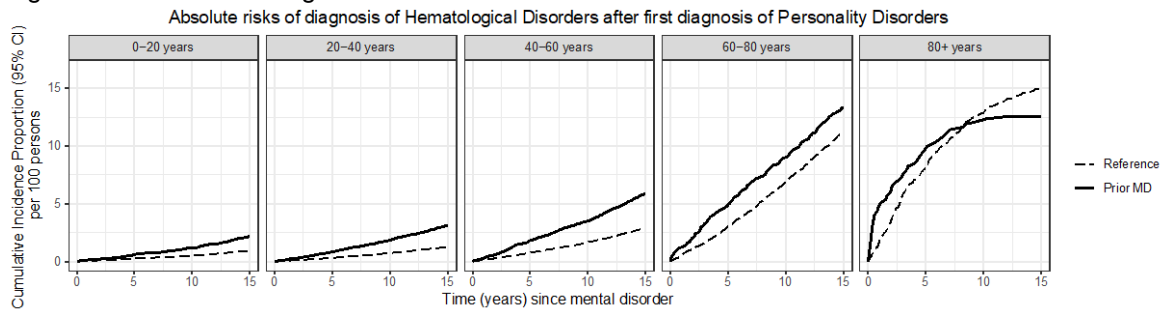

Figure S89.8 – Cancers

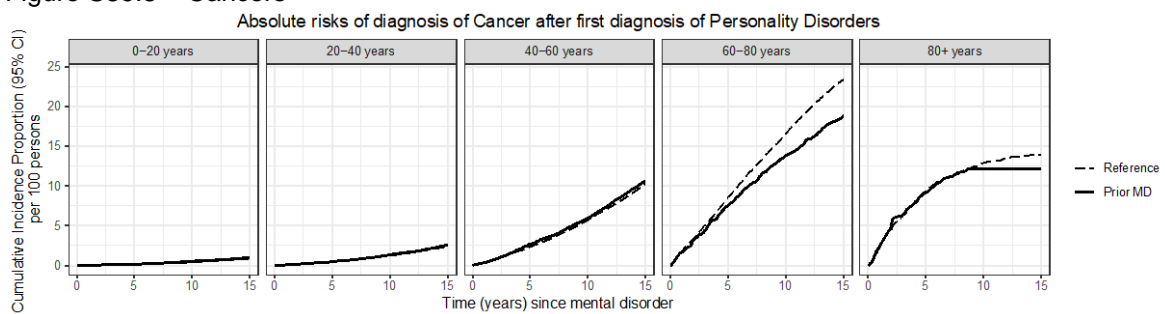

Figure S89.9 – Neurological Conditions

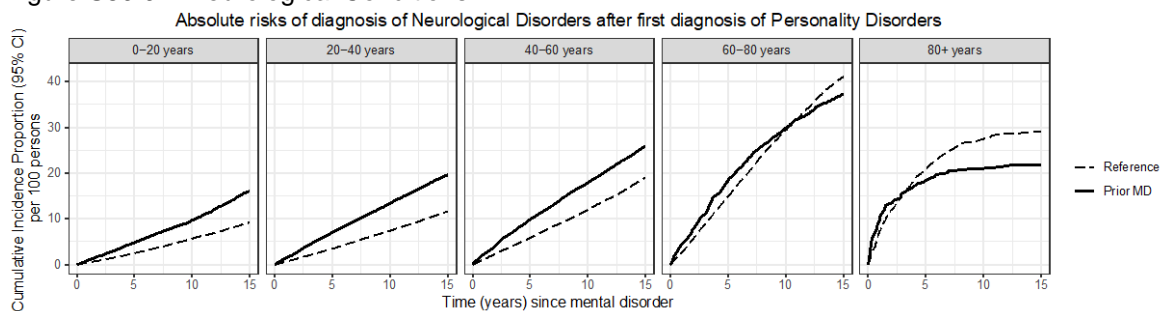

**Figures S90.1-S90.9. Absolute risks of being diagnosed with general medical conditions after first diagnosis of Intellectual Disabilities.**

**Figure S90.1 – Circulatory Conditions**

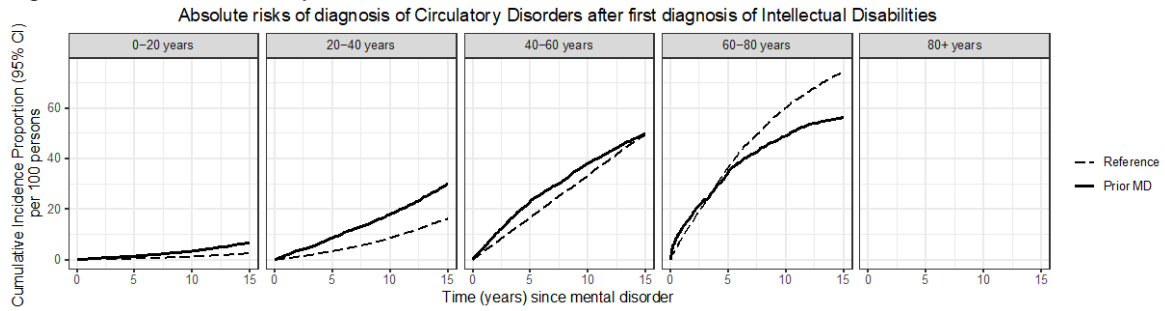

**Figure S90.2 – Endocrine Conditions**

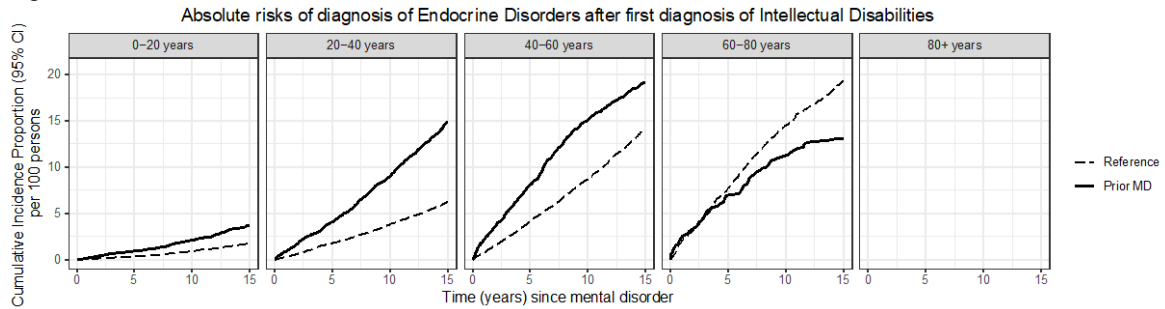

**Figure S90.3 – Pulmonary Conditions**

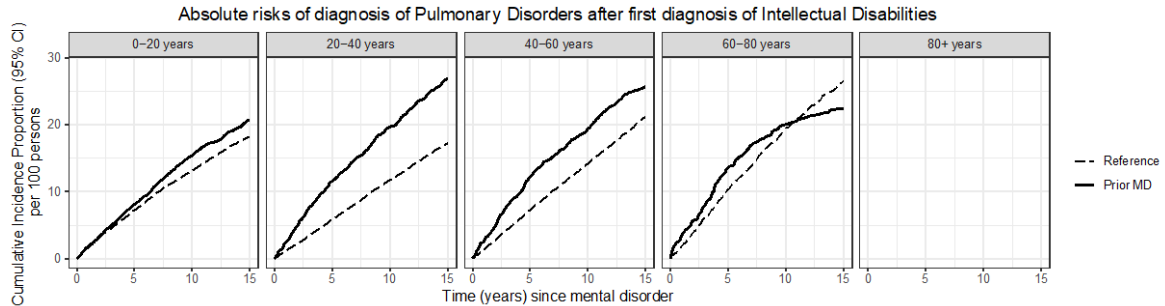

**Figure S90.4 – Gastrointestinal Conditions**

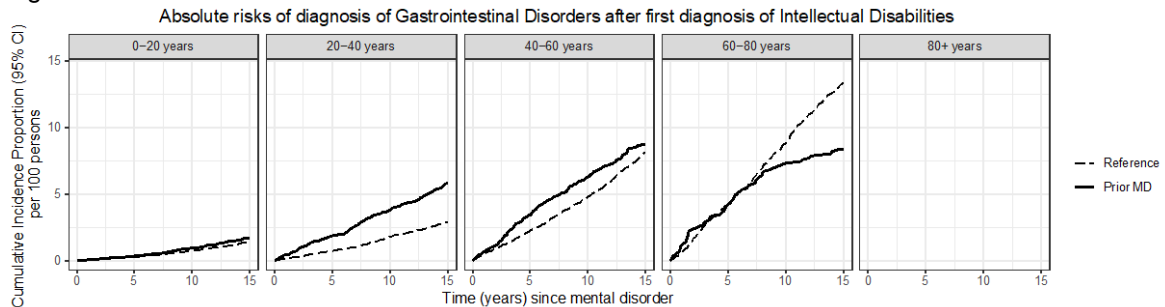

Figure S90.5 – Urogenital Conditions

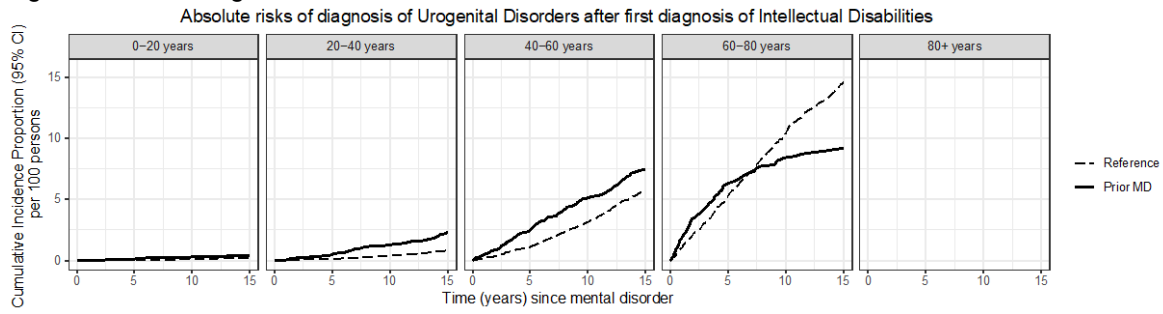

Figure S90.6 – Musculoskeletal Conditions

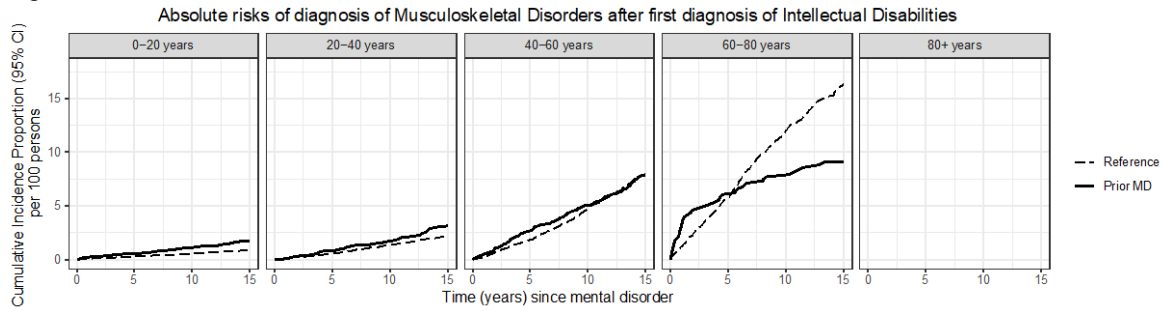

Figure S90.7 – Hematological Conditions

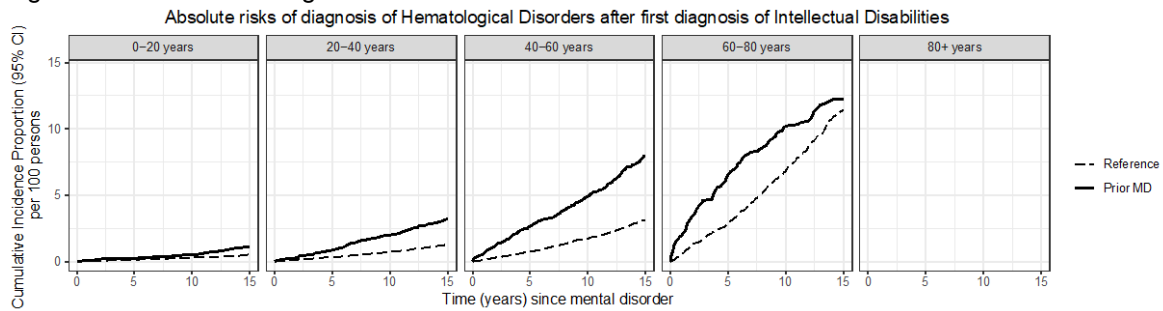

Figure S90.8 – Cancers

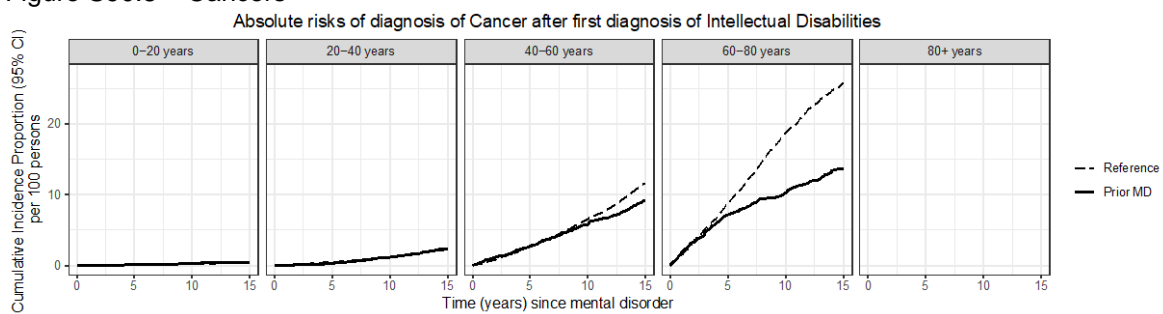

Figure S90.9 – Neurological Conditions

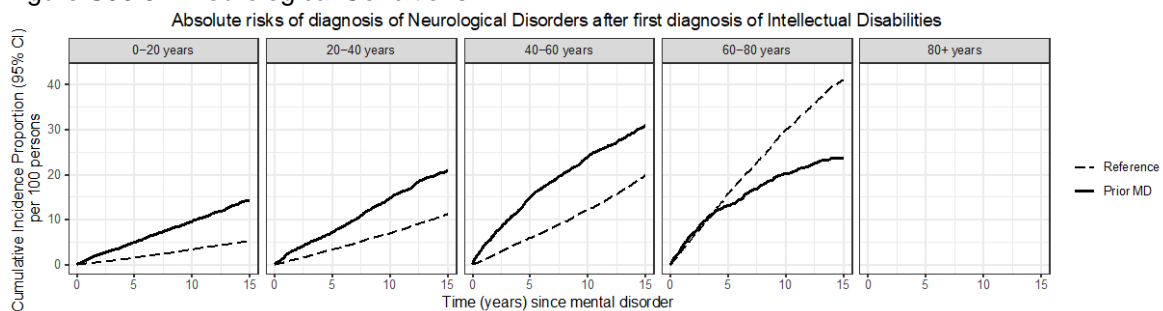

**Figures S91.1-S91.9. Absolute risks of being diagnosed with general medical conditions after first diagnosis of Developmental Disorder.**

**Figure S91.1 – Circulatory Conditions**

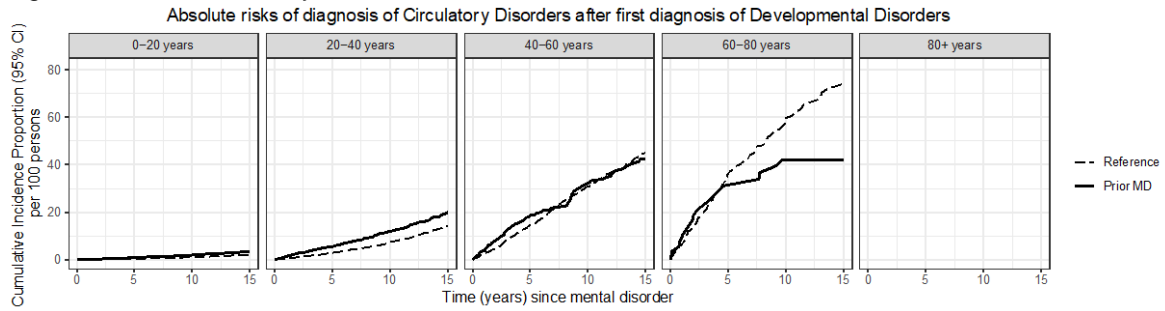

**Figure S91.2 – Endocrine Conditions**

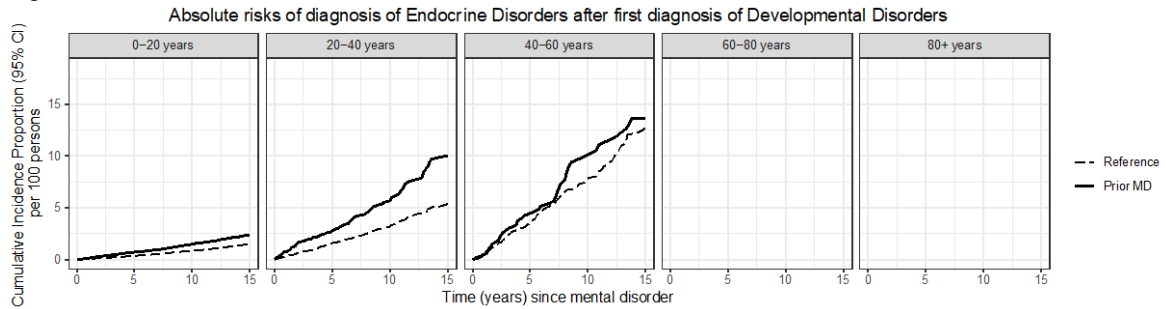

**Figure S91.3 – Pulmonary Conditions**

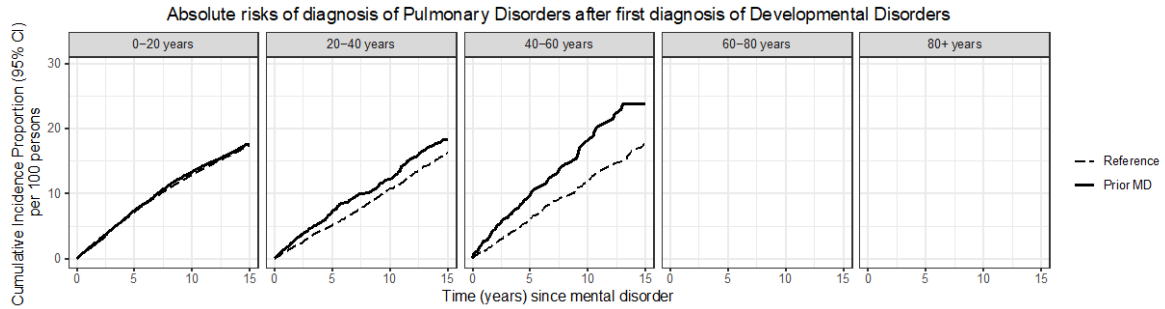

**Figure S91.4 – Gastrointestinal Conditions**

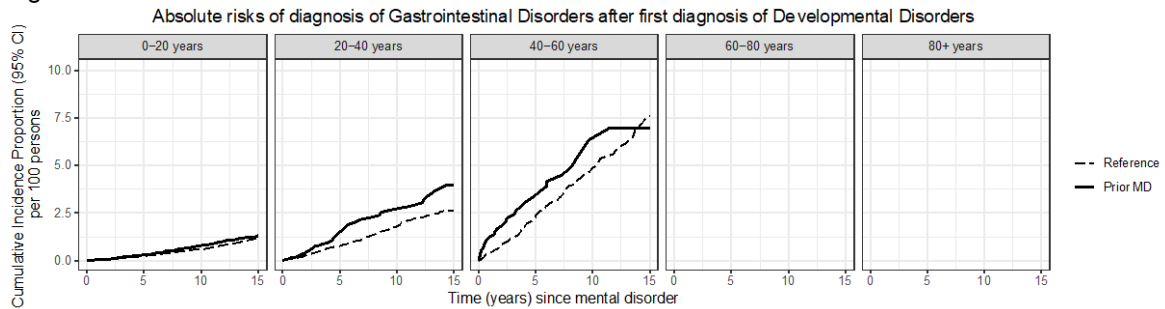

Figure S91.5 – Urogenital Conditions

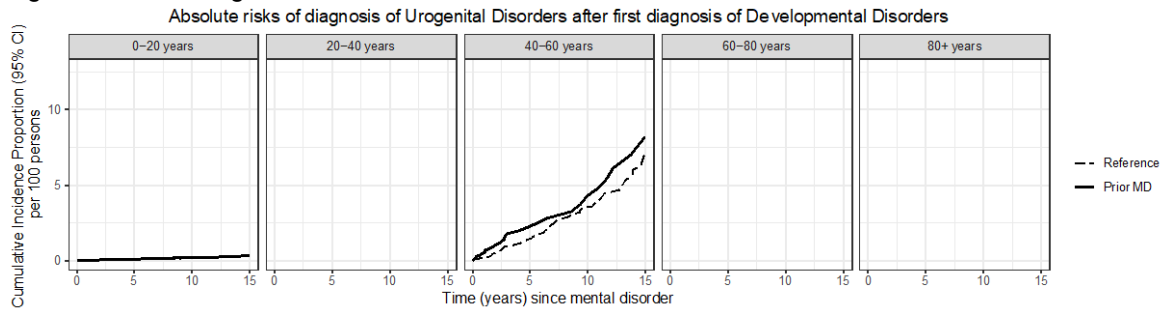

Figure S91.6 – Musculoskeletal Conditions

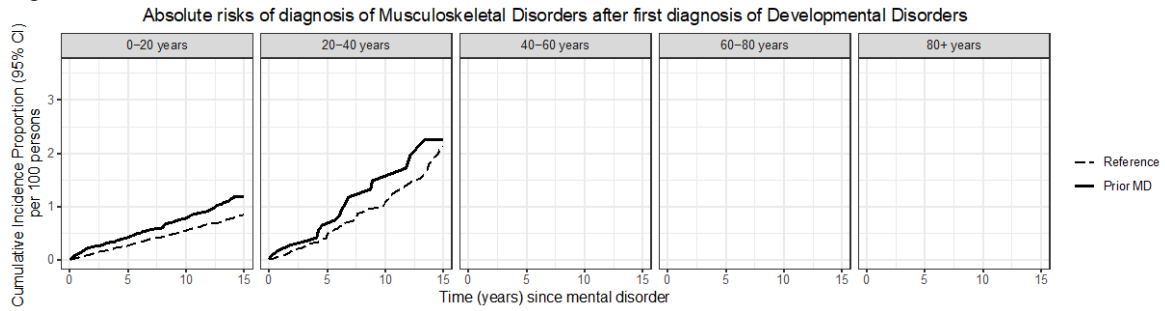

Figure S91.7 – Hematological Conditions

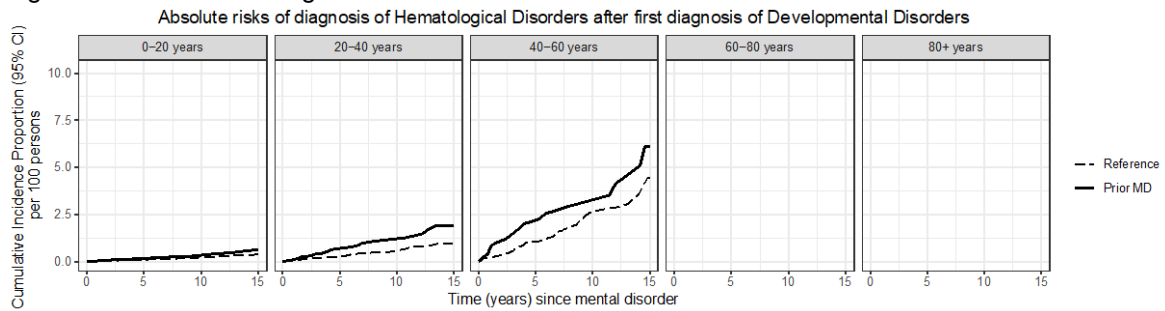

Figure S91.8 – Cancers

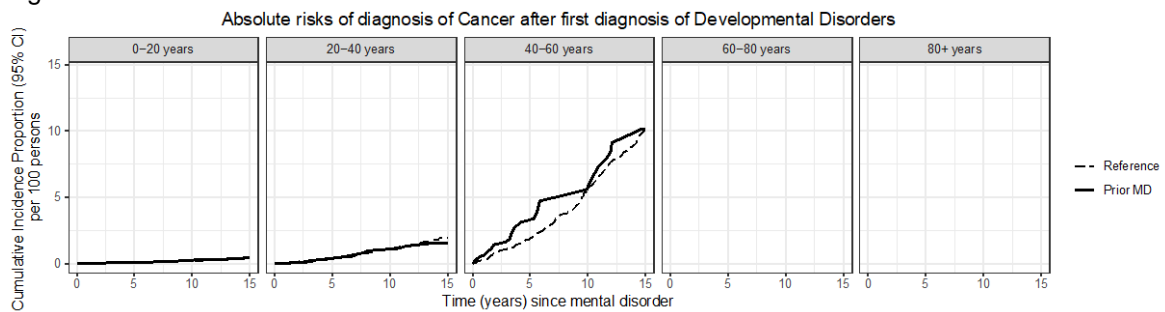

Figure S91.9 – Neurological Conditions

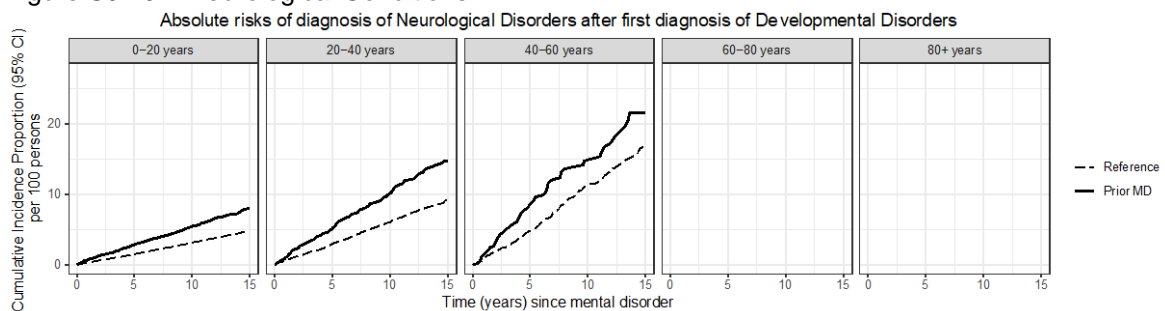



**Figures S92.1-S92.9. Absolute risks of being diagnosed with general medical conditions after first diagnosis of Behavioral Disorder.**

**Figure S92.1 – Circulatory Conditions**

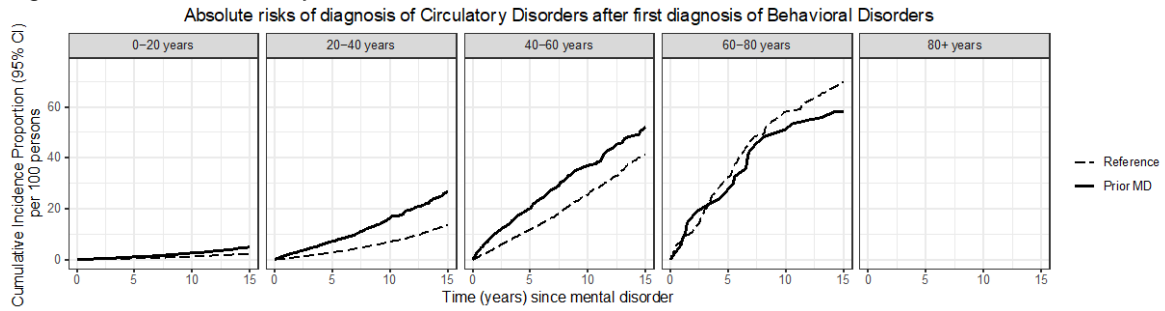

**Figure S92.2 – Endocrine Conditions**

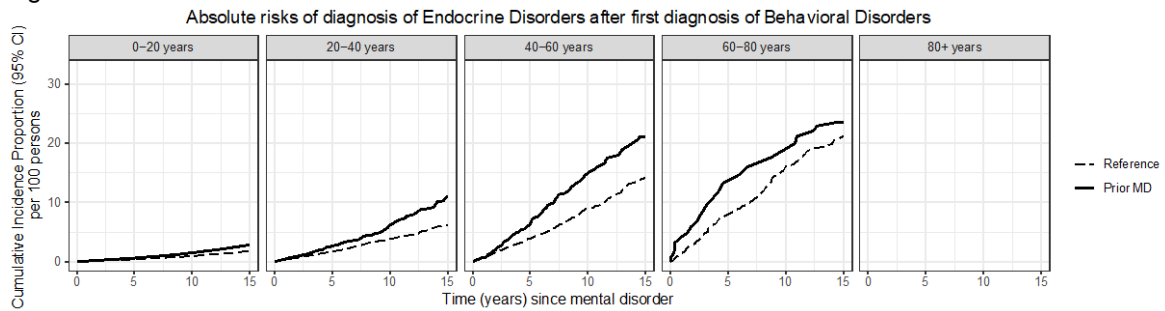

**Figure S92.3 – Pulmonary Conditions**

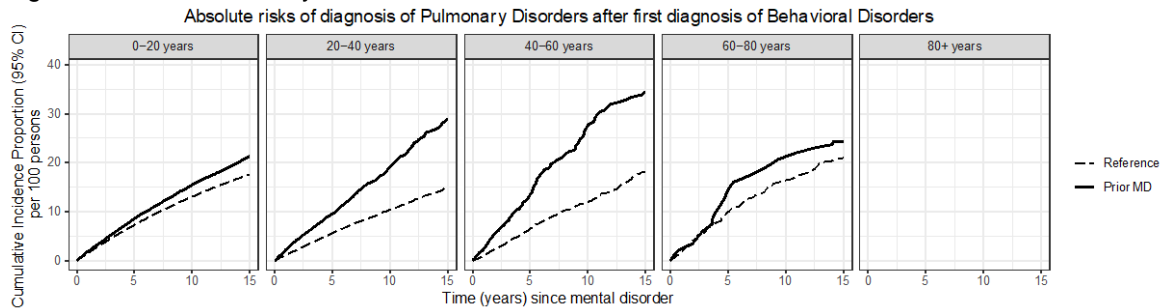

**Figure S92.4 – Gastrointestinal Conditions**

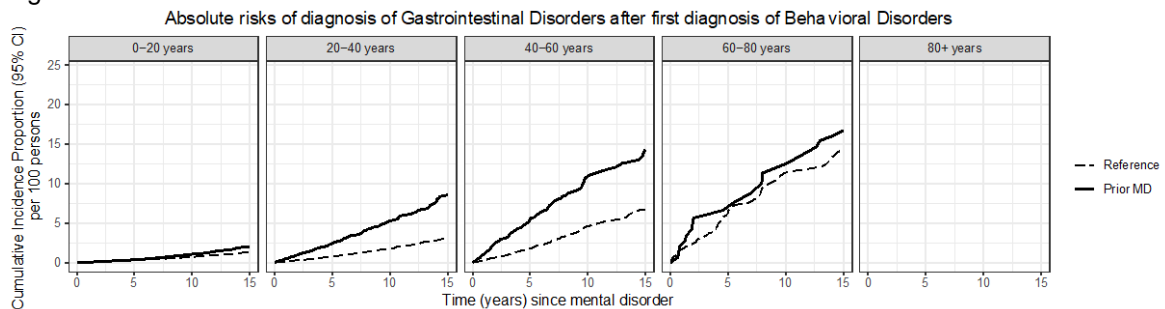

**Figure S92.5 – Urogenital Conditions**

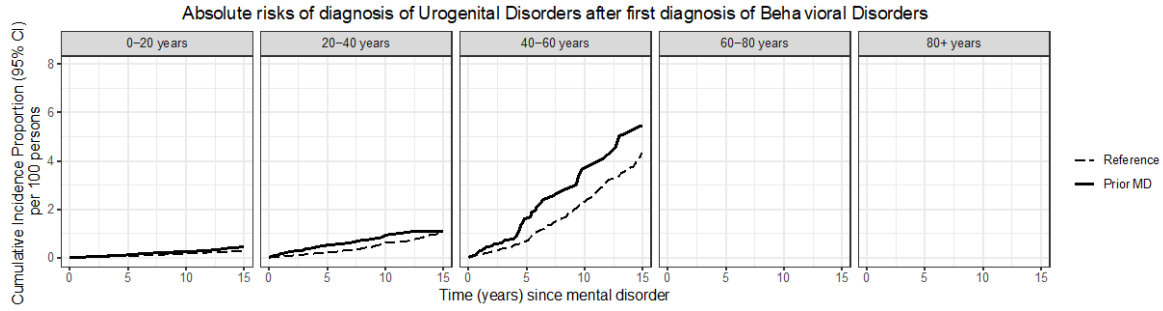

**Figure S92.6 – Musculoskeletal Conditions**

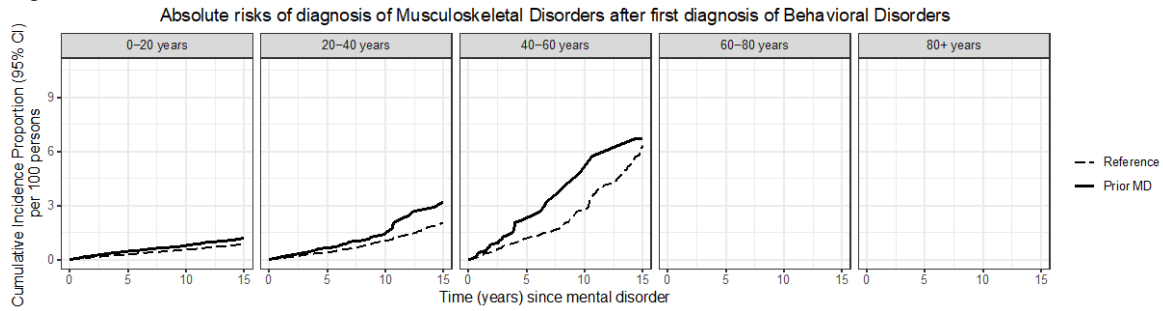

**Figure S92.7 – Hematological Conditions**

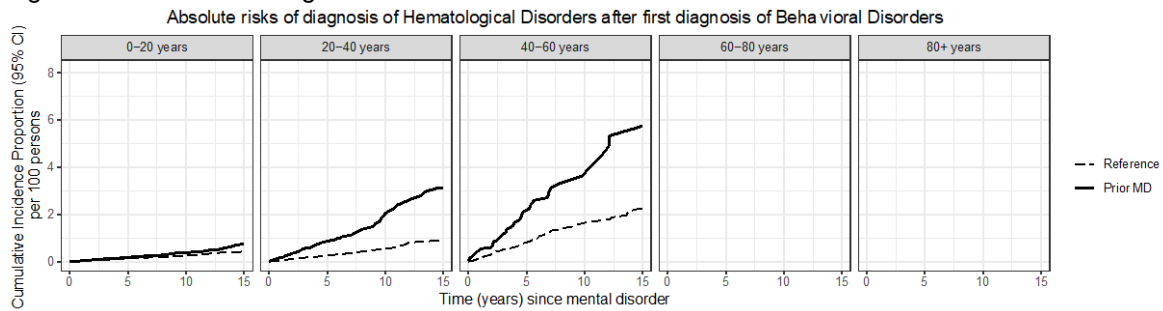

**Figure S92.8 – Cancers**

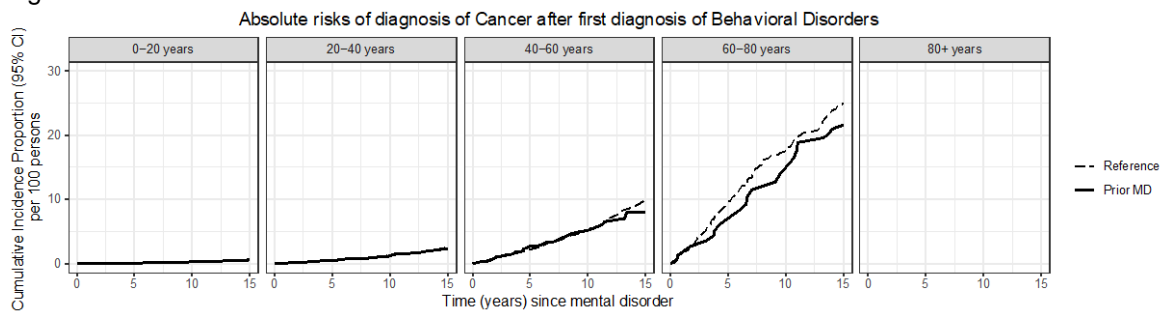

**Figure S92.9 – Neurological Conditions**

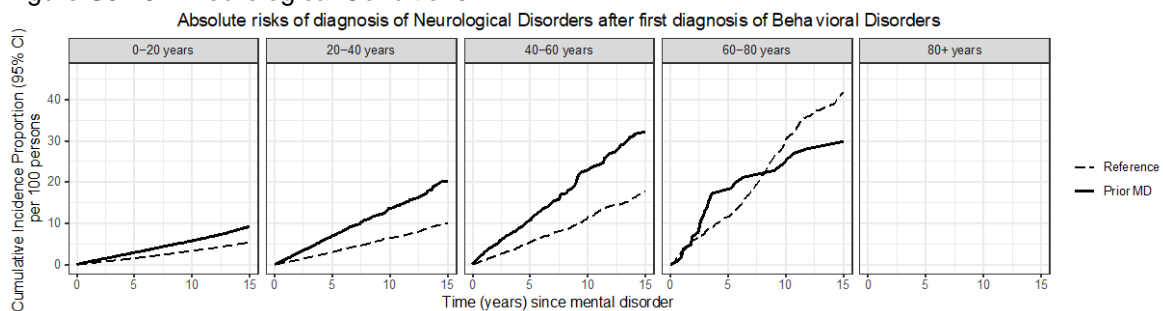

**Figures S93.1-S93.9. Absolute risks of being diagnosed with general medical conditions after first diagnosis of Organic Disorders**

**Figure S93.1 – Circulatory Conditions**

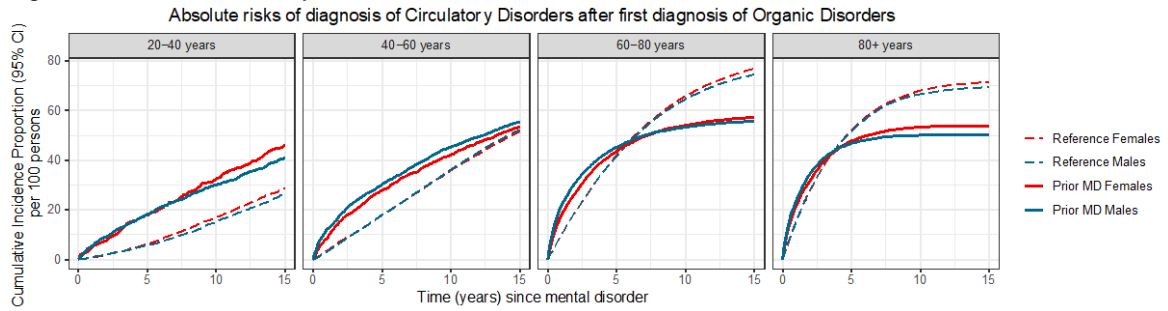

**Figure S93.2 – Endocrine Conditions**

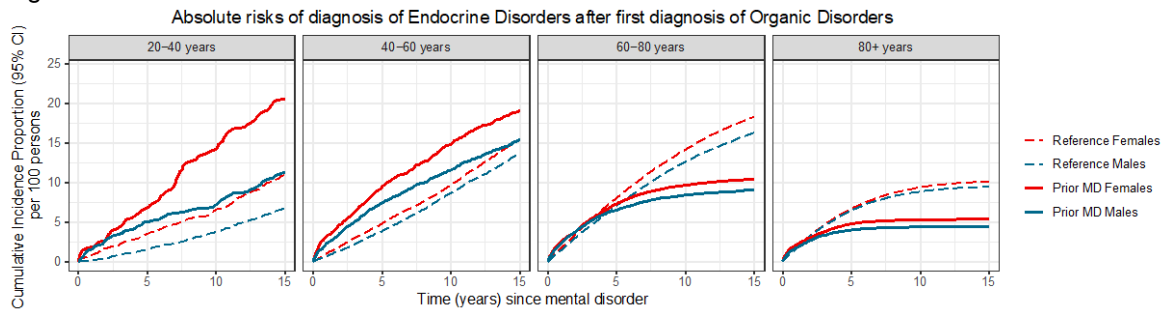

**Figure S93.3 – Pulmonary Conditions**

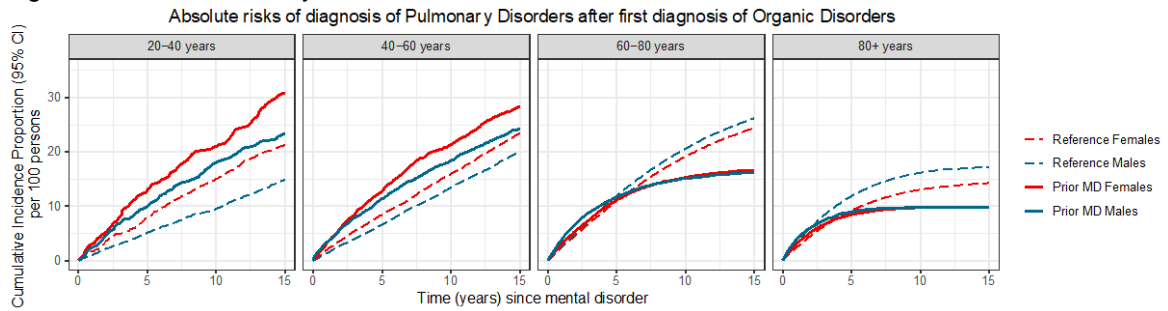

**Figure S93.4 – Gastrointestinal Conditions**

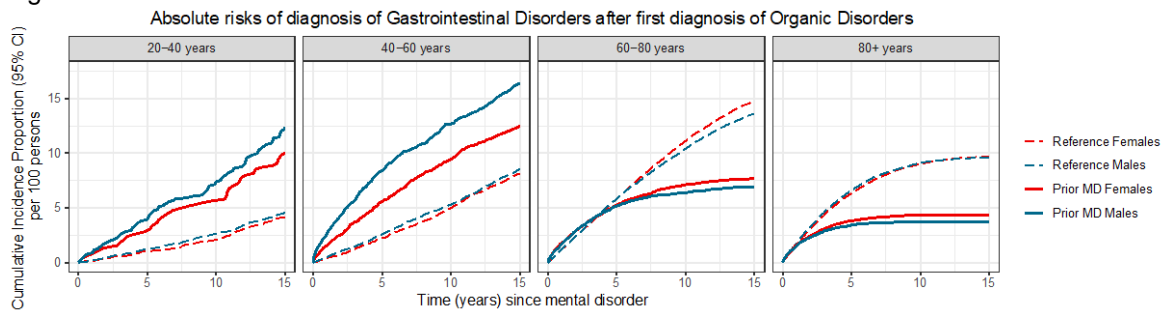

Figure S93.5 – Urogenital Conditions

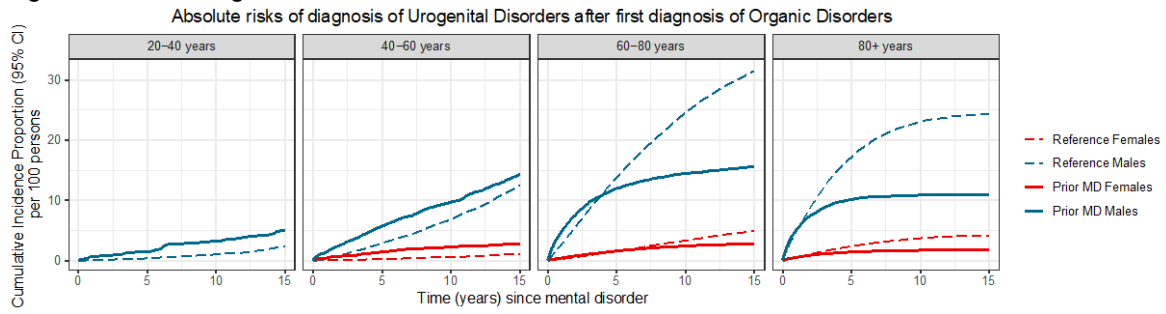

Figure S93.6 – Musculoskeletal Conditions

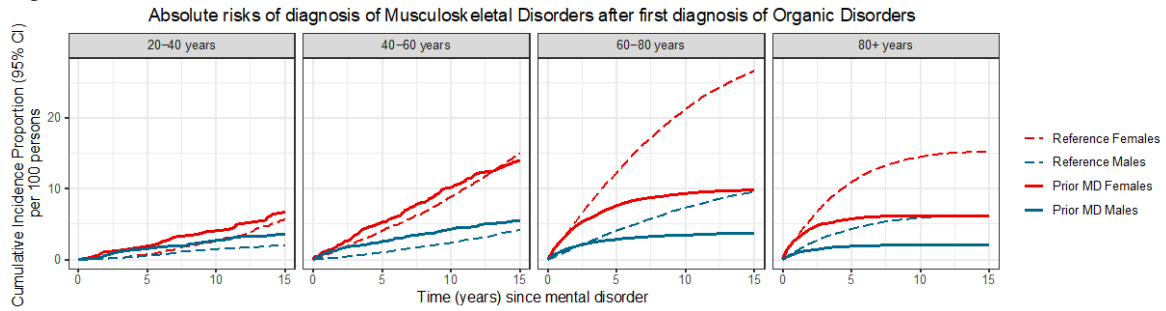

Figure S93.7 – Hematological Conditions

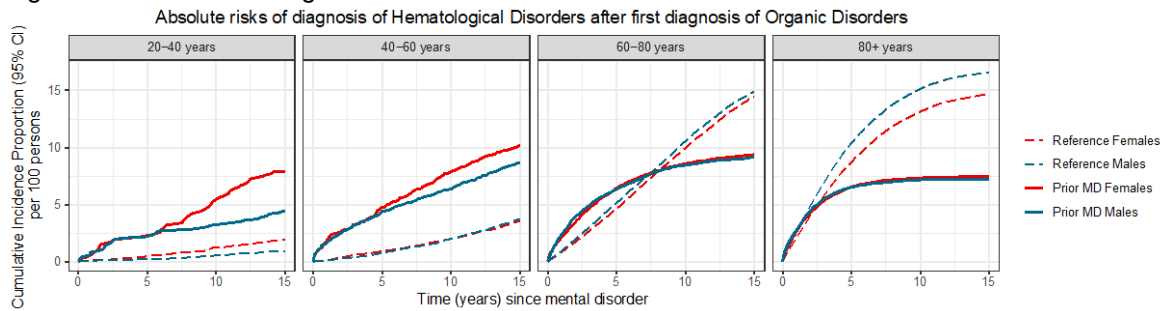

Figure S93.8 – Cancers

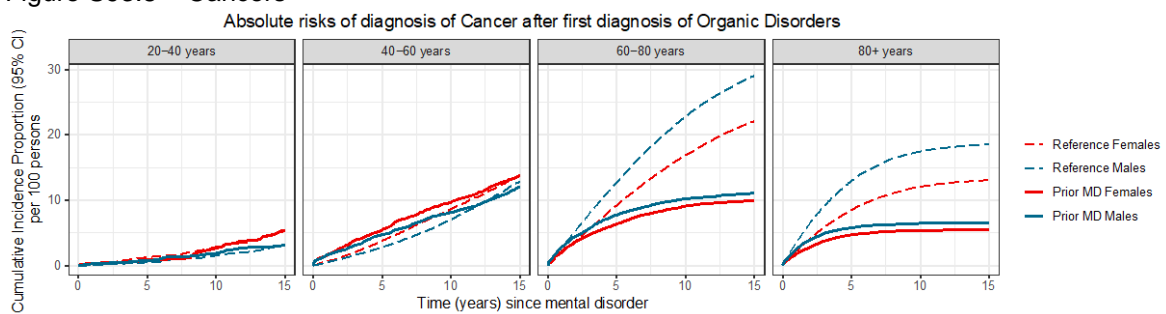

Figure S93.9 – Neurological Conditions

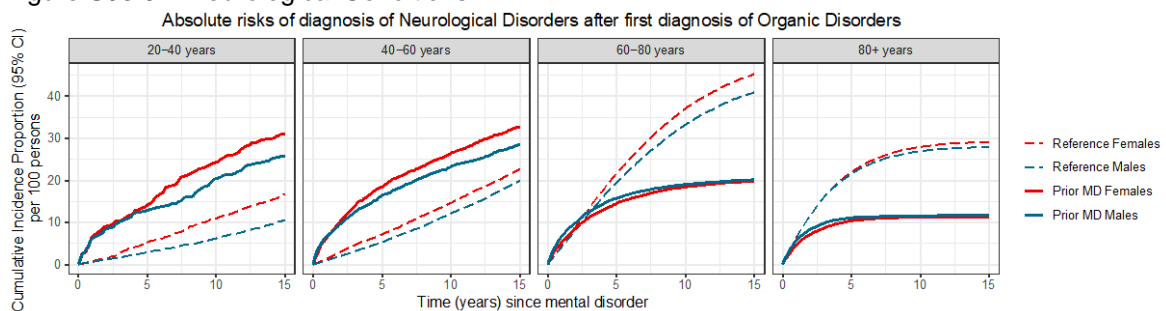

**Figures S94.1-S94.9. Absolute risks of being diagnosed with general medical conditions after first diagnosis of Substance Use Disorders**

**Figure S94.1 – Circulatory Conditions**

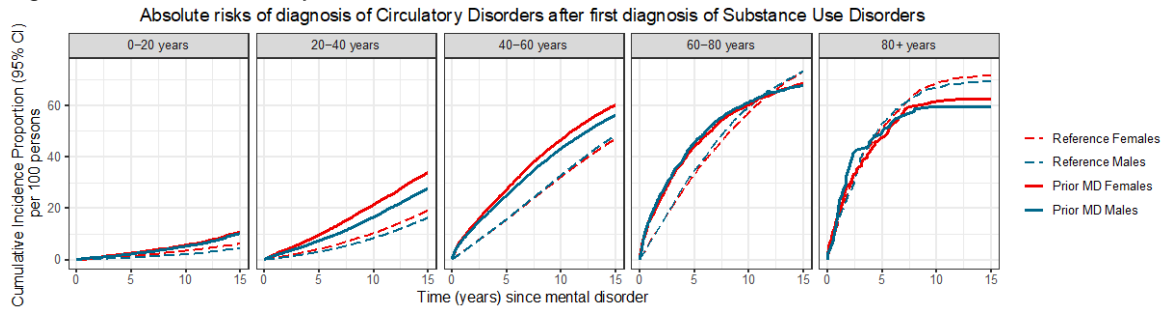

**Figure S94.2 – Endocrine Conditions**

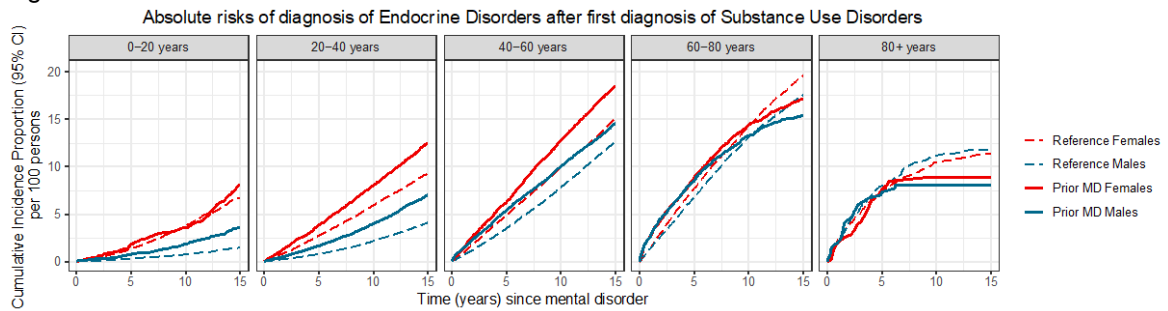

**Figure S94.3 – Pulmonary Conditions**

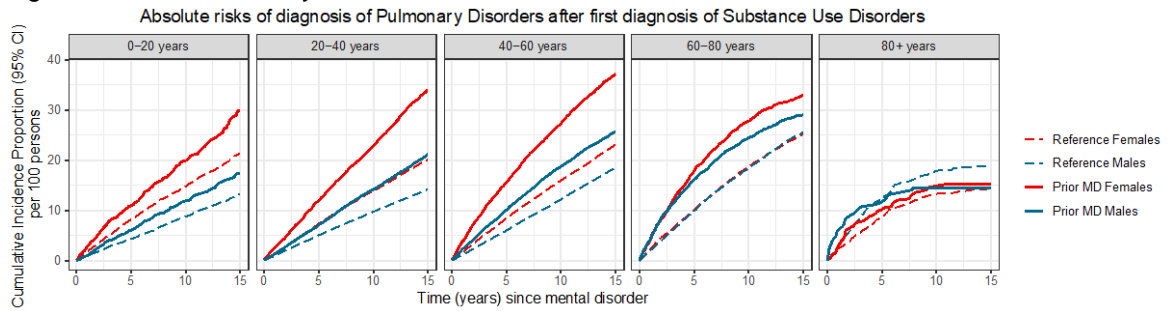

**Figure S94.4 – Gastrointestinal Conditions**

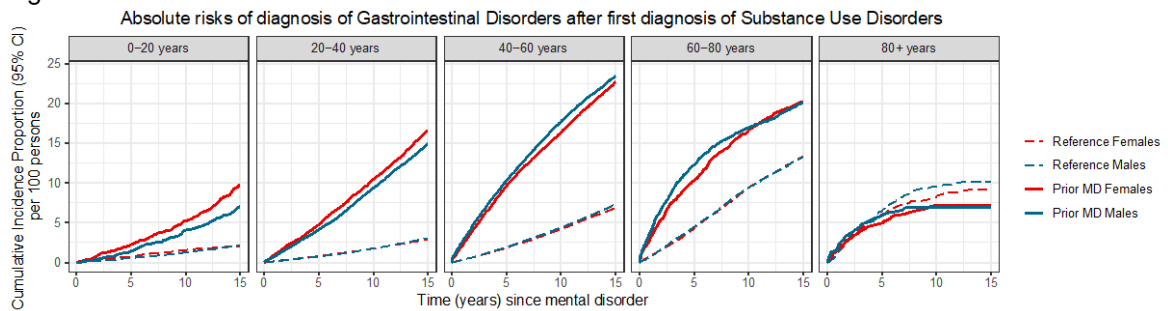

Figure S94.5 – Urogenital Conditions

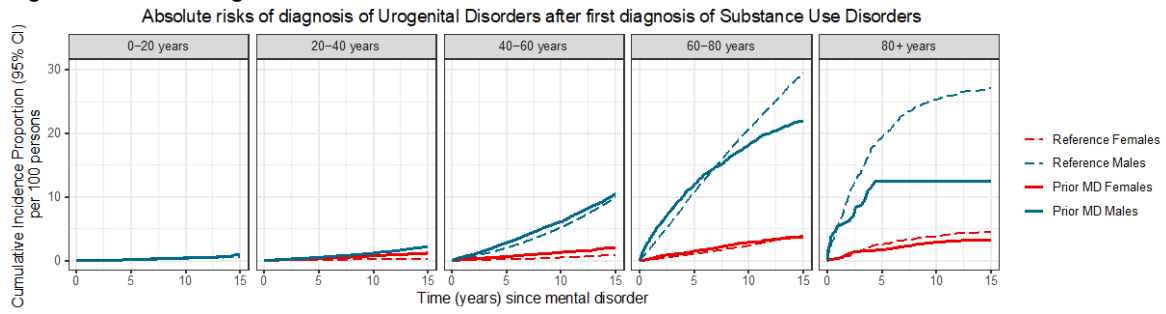

Figure S94.6 – Musculoskeletal Conditions

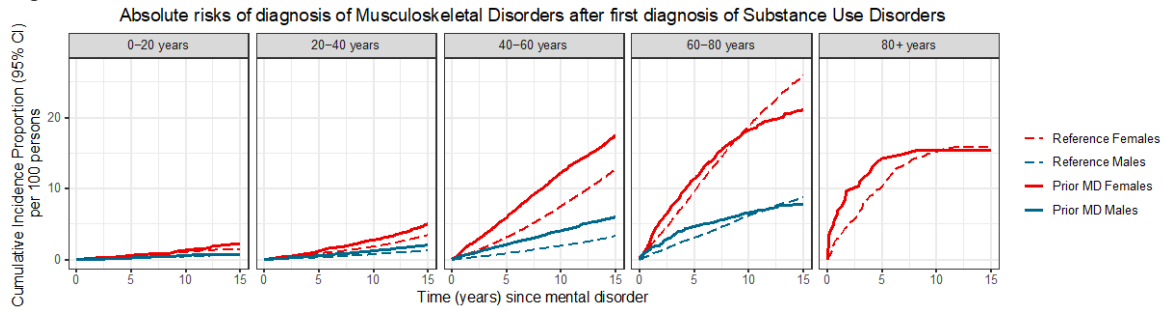

Figure S94.7 – Hematological Conditions

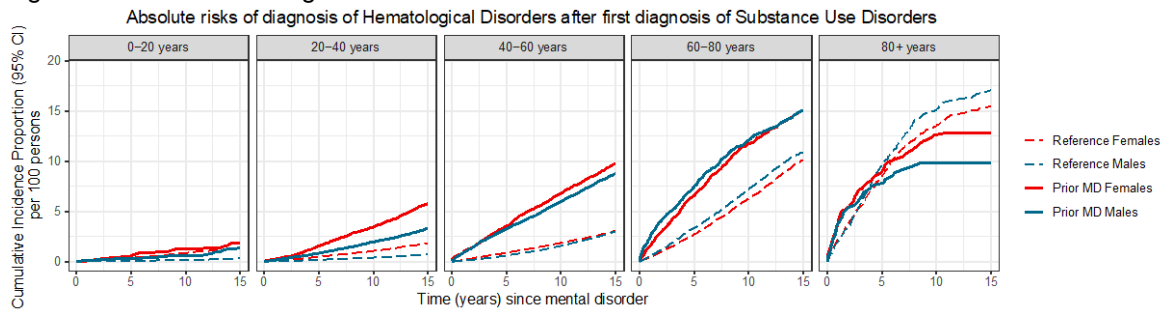

Figure S94.8 – Cancers

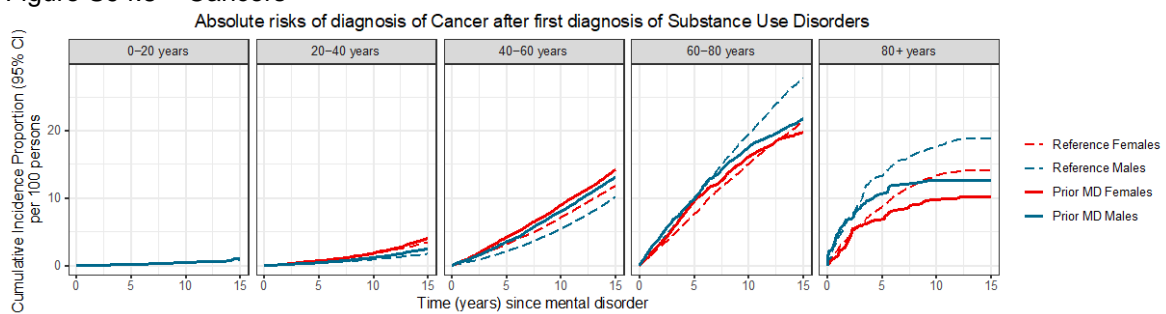

Figure S94.9 – Neurological Conditions

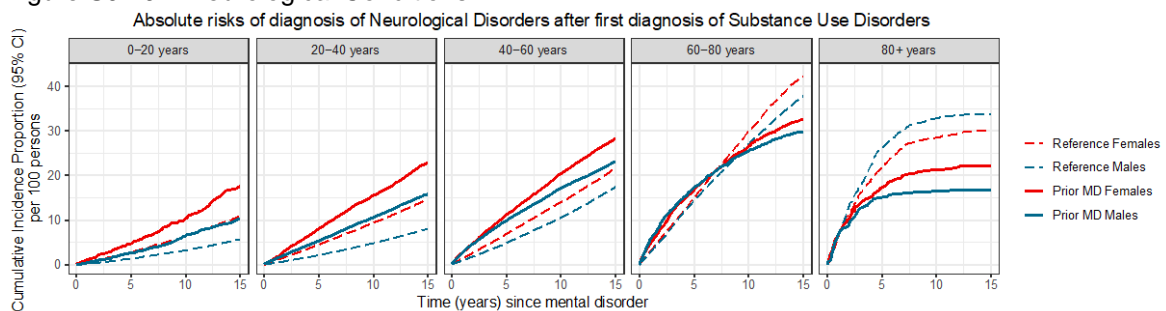

**Figures S95.1-S95.9. Absolute risks of being diagnosed with general medical conditions after first diagnosis of Schizophrenia**

**Figure S95.1 – Circulatory Conditions**

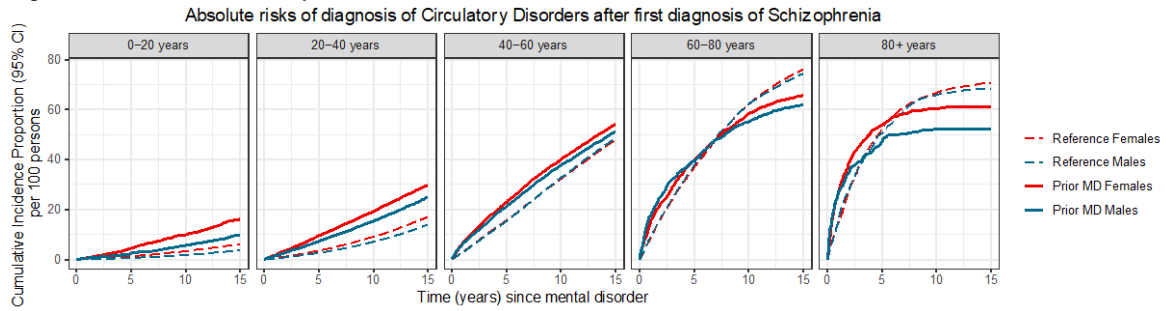

**Figure S95.2 – Endocrine Conditions**

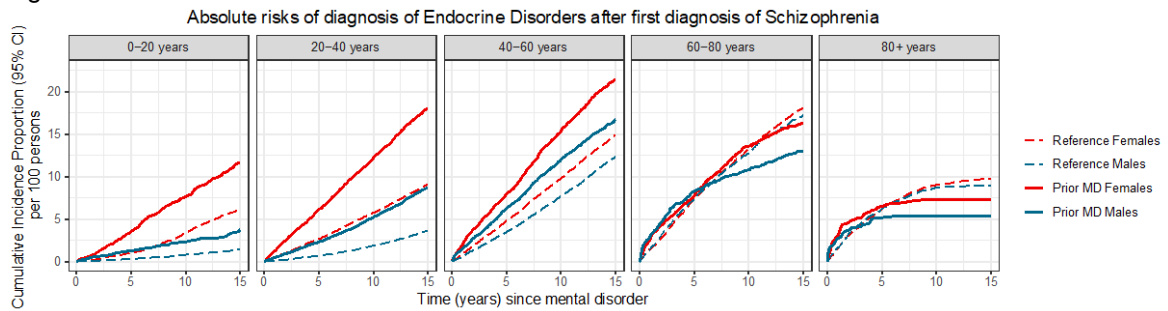

**Figure S95.3 – Pulmonary Conditions**

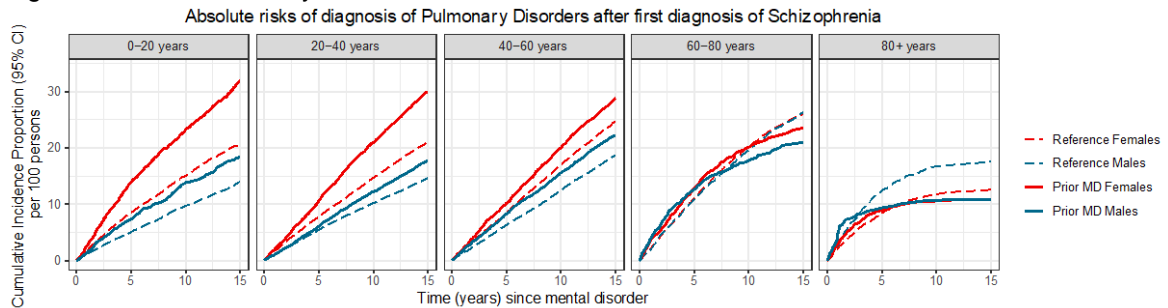

**Figure S95.4 – Gastrointestinal Conditions**

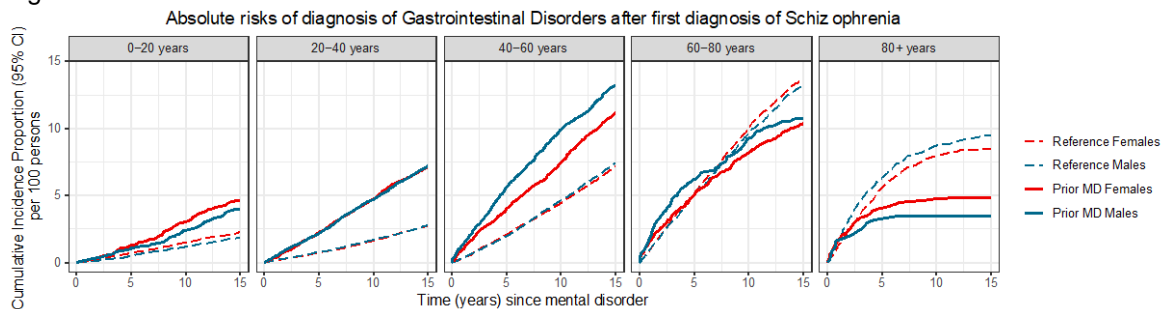

Figure S95.5 – Urogenital Conditions

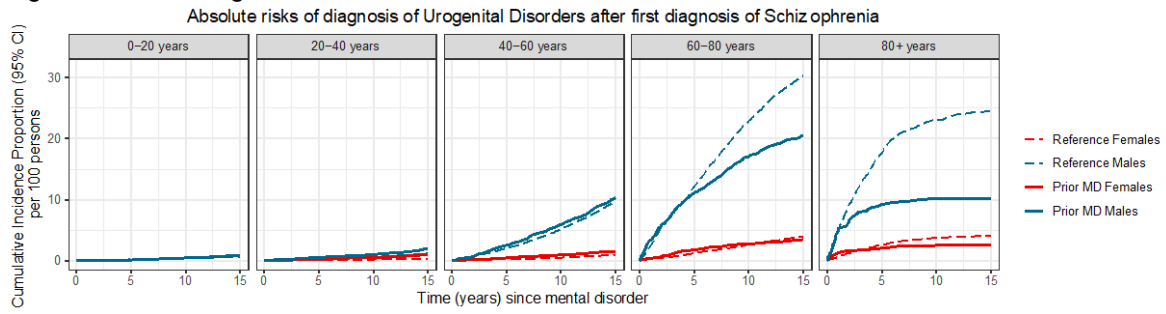

Figure S95.6 – Musculoskeletal Conditions

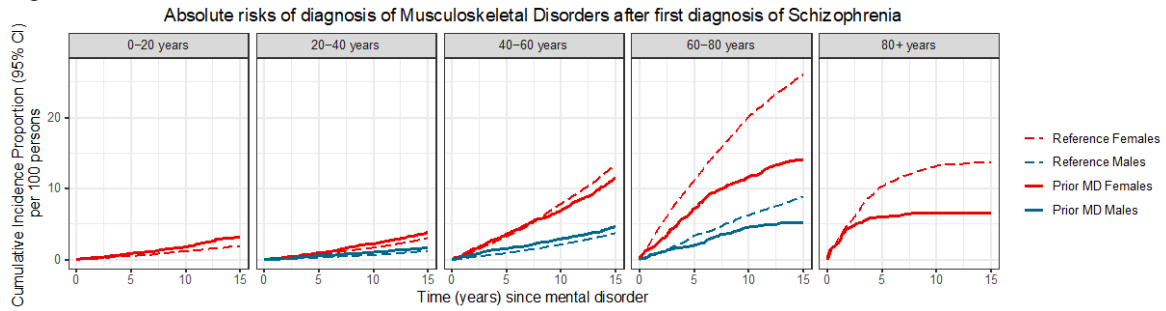

Figure S95.7 – Hematological Conditions

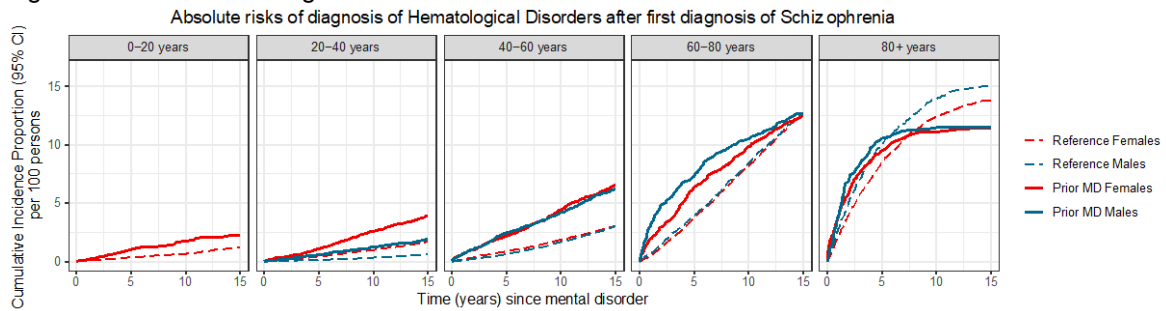

Figure S95.8 – Cancers

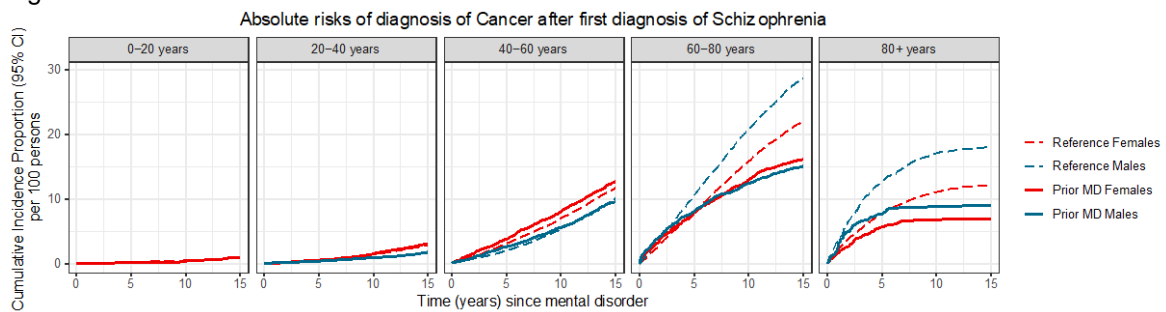

Figure S95.9 – Neurological Conditions

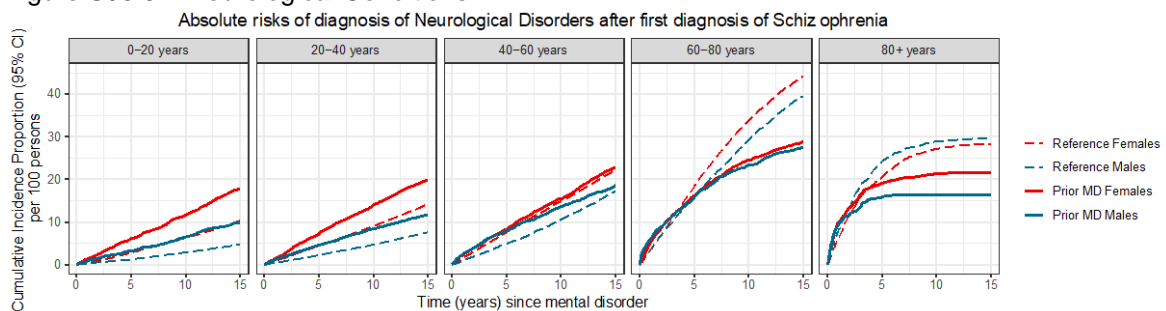



**Figures S96.1-S96.9. Absolute risks of being diagnosed with general medical conditions after first diagnosis of Mood Disorders**

**Figure S96.1 – Circulatory Conditions**

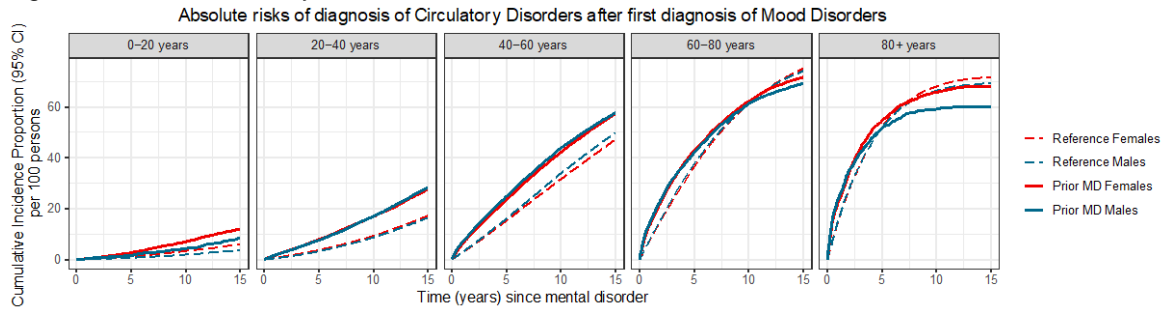

**Figure S96.2 – Endocrine Conditions**

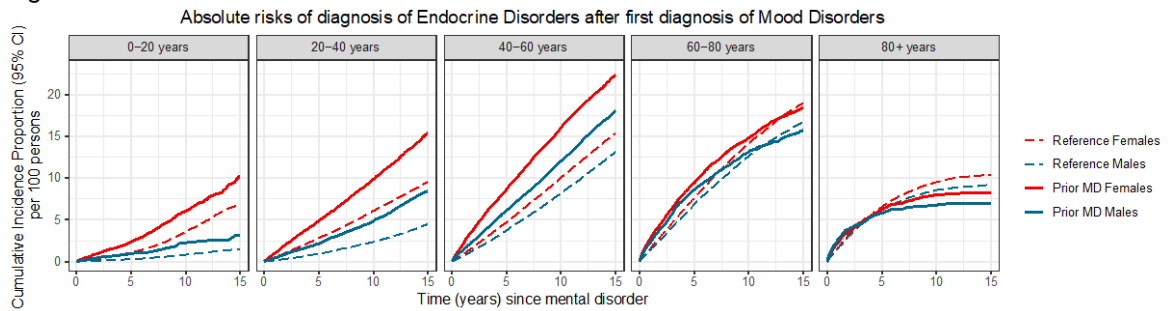

**Figure S96.3 – Pulmonary Conditions**

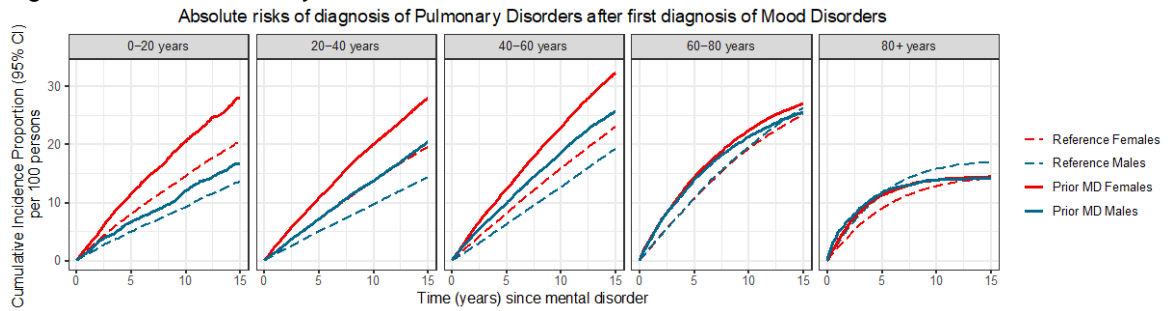

**Figure S96.4 – Gastrointestinal Conditions**

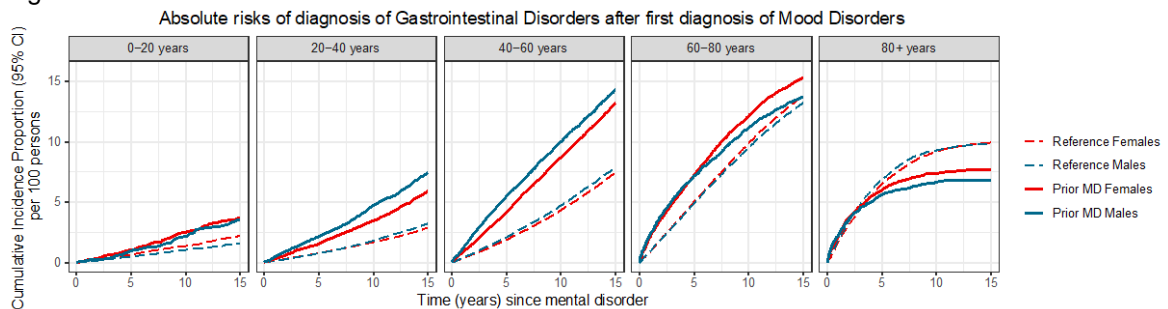

Figure S96.5 – Urogenital Conditions

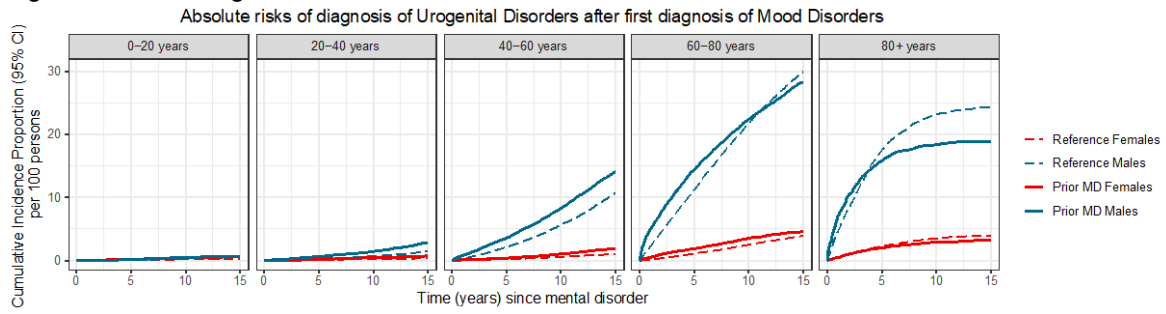

Figure S96.6 – Musculoskeletal Conditions

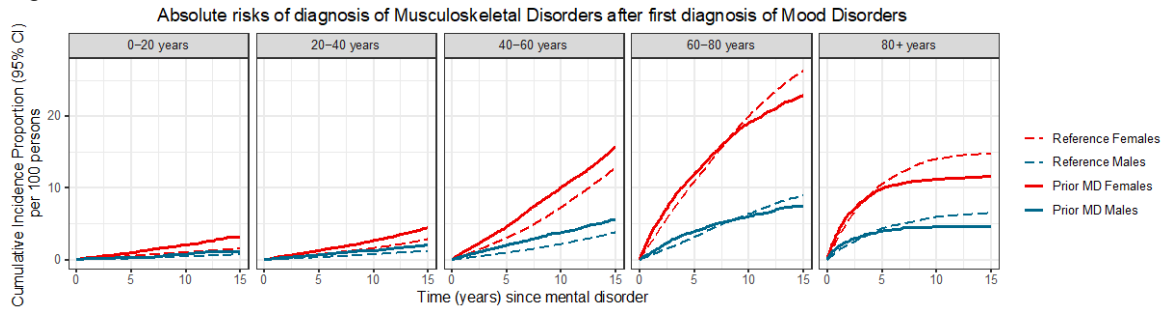

Figure S96.7 – Hematological Conditions

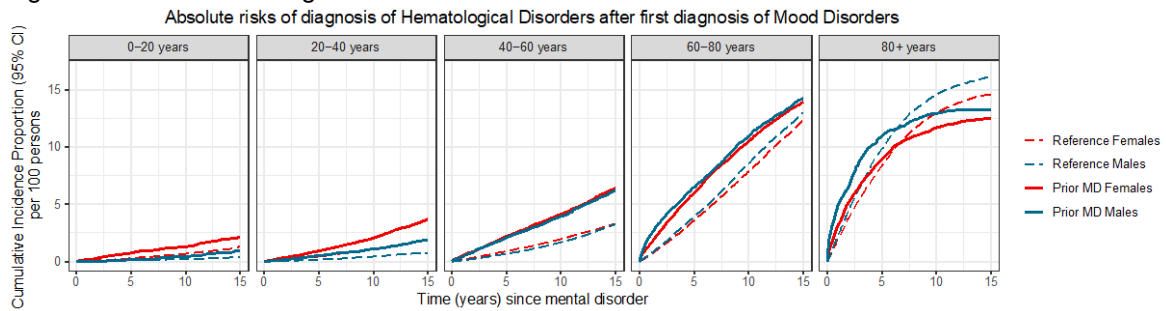

Figure S96.8 – Cancers

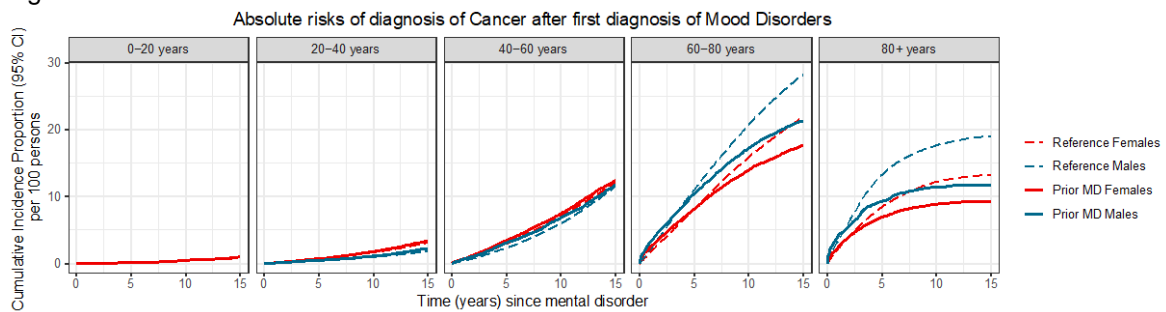

Figure S96.9 – Neurological Conditions

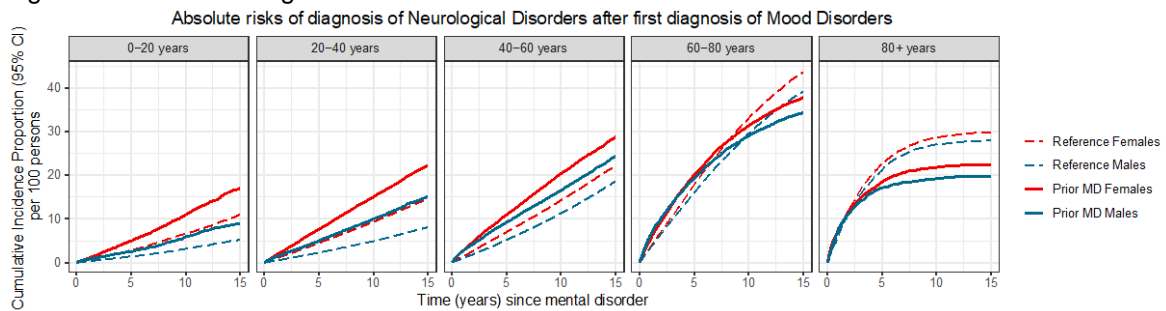

**Figures S97.1-S97.9. Absolute risks of being diagnosed with general medical conditions after first diagnosis of Neurotic Disorders**

**Figure S97.1 – Circulatory Conditions**

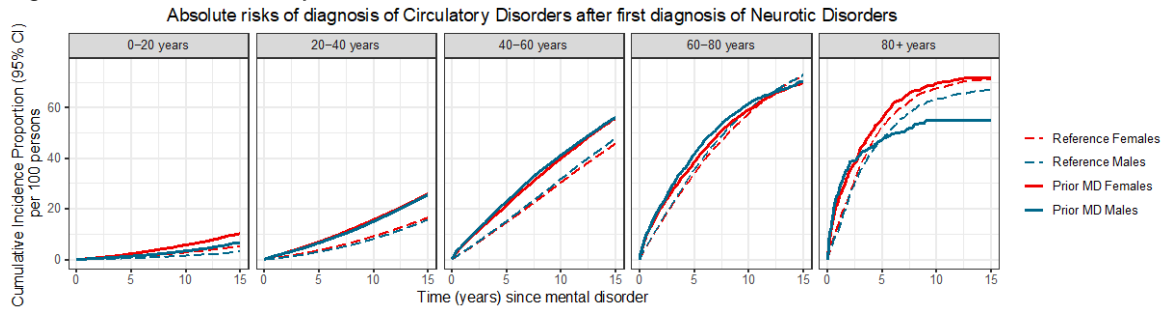

**Figure S97.2 – Endocrine Conditions**

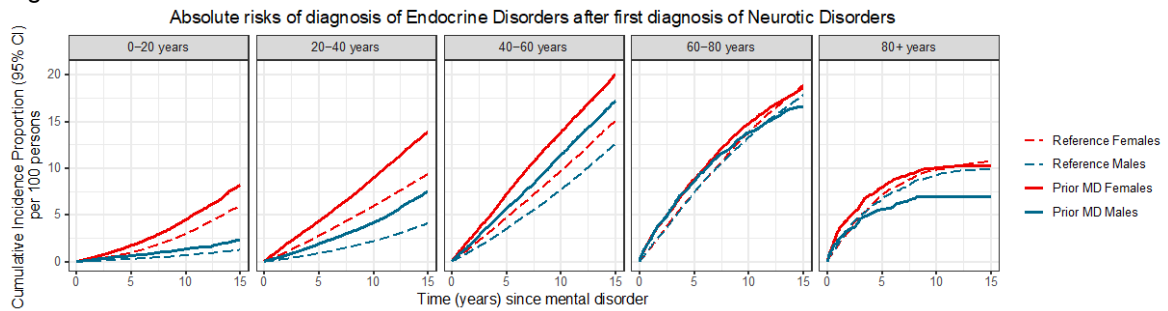

**Figure S97.3 – Pulmonary Conditions**

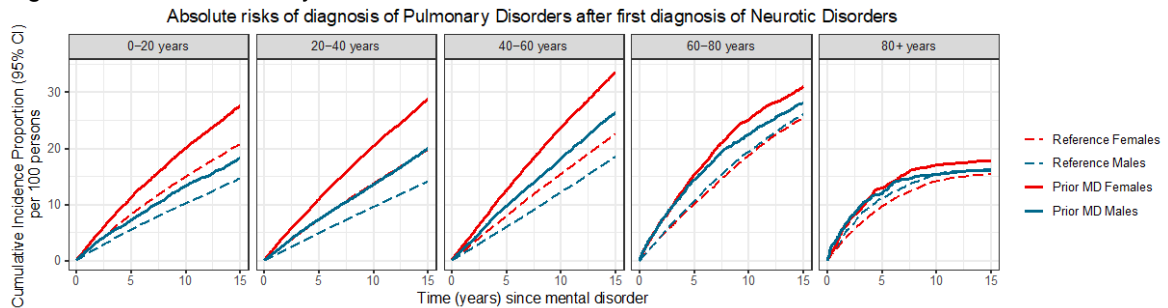

**Figure S97.4 – Gastrointestinal Conditions**

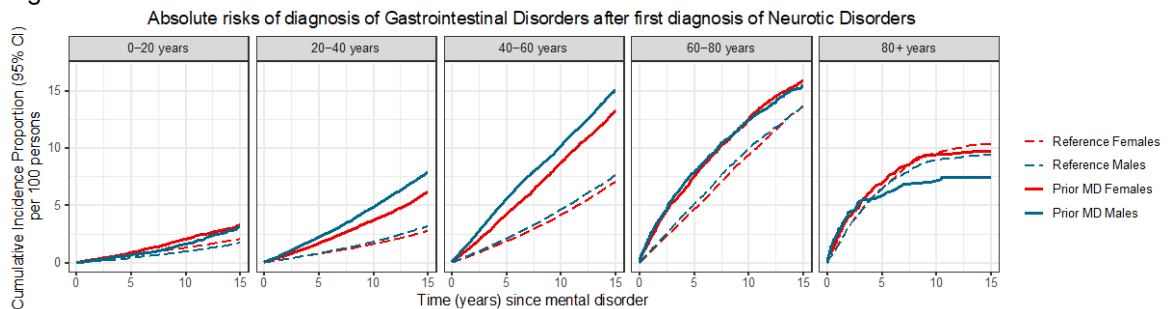

Figure S97.5 – Urogenital Conditions

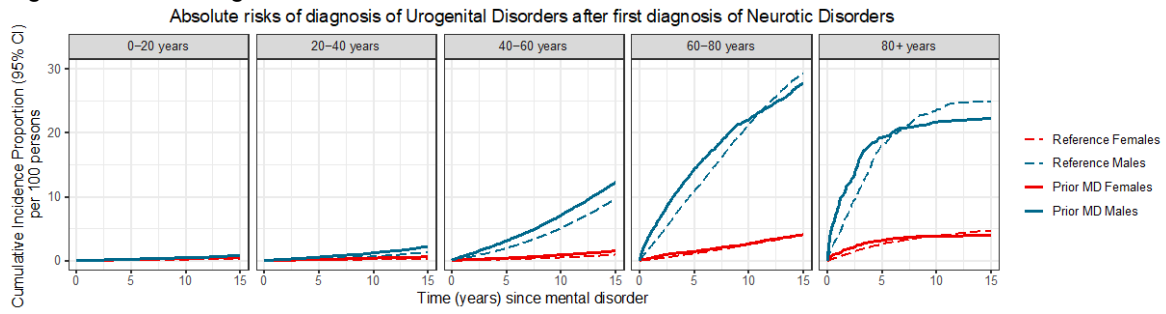

Figure S97.6 – Musculoskeletal Conditions



Figure S97.7 – Hematological Conditions

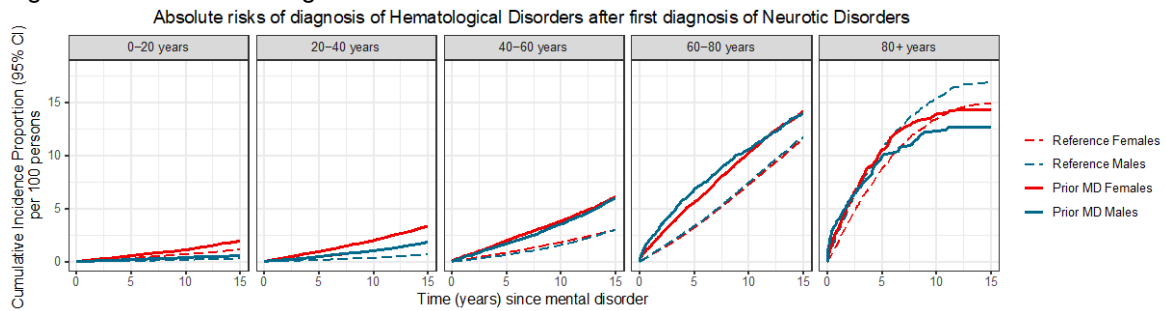

Figure S97.8 – Cancers

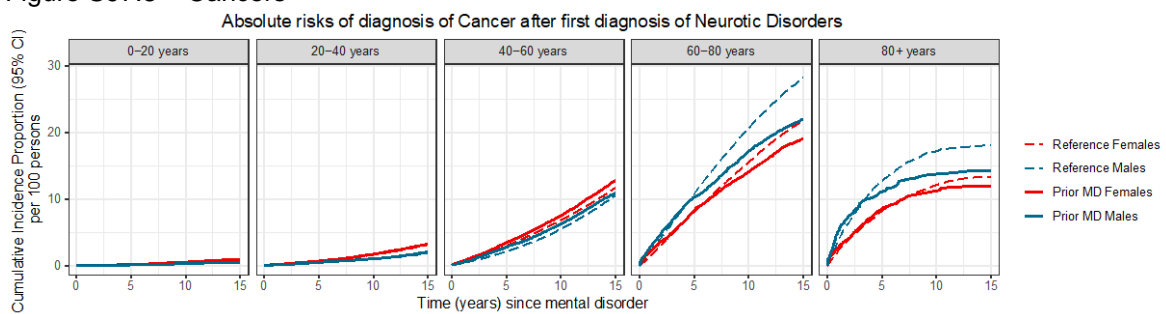

Figure S97.9 – Neurological Conditions

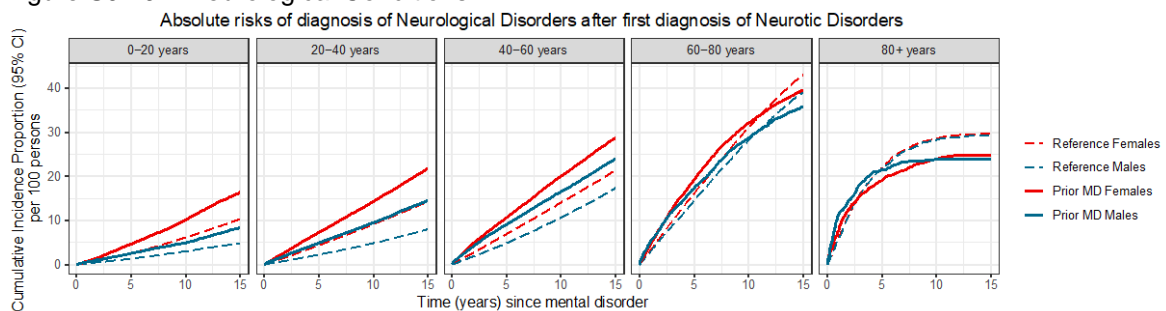

**Figures S98.1-S98.9. Absolute risks of being diagnosed with general medical conditions after first diagnosis of Eating Disorders**

**Figure S98.1 – Circulatory Conditions**

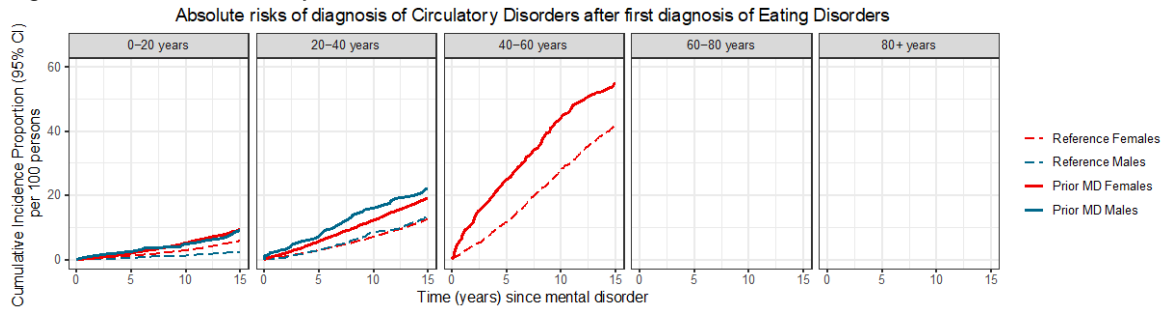

**Figure S98.2 – Endocrine Conditions**

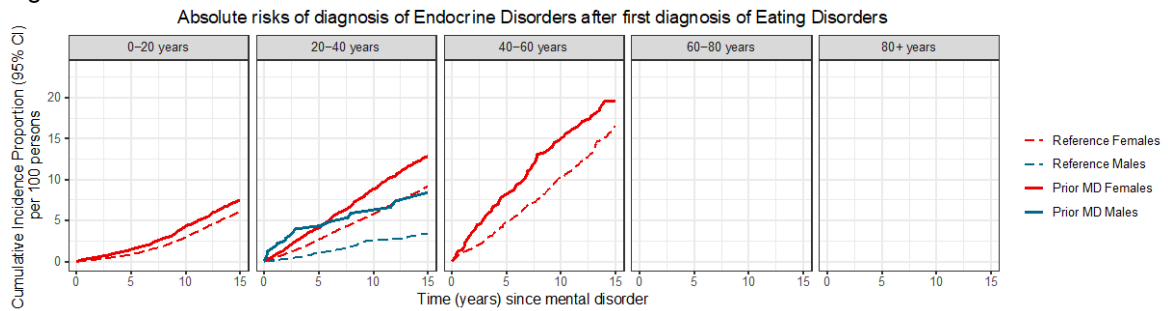

**Figure S98.3 – Pulmonary Conditions**

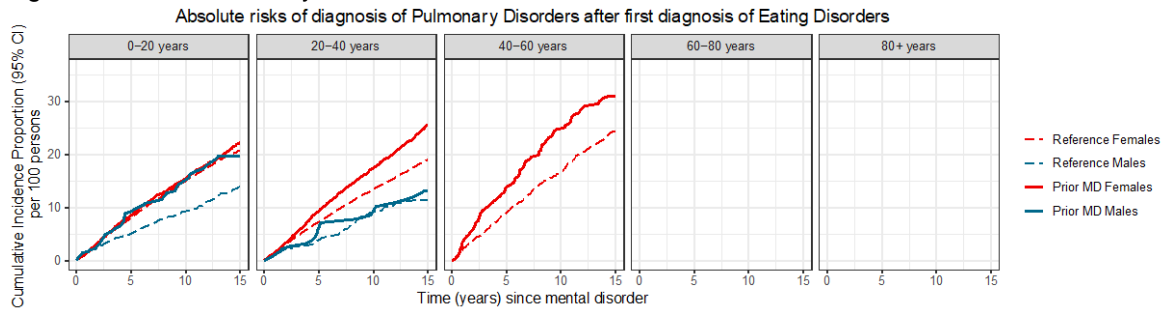

**Figure S98.4 – Gastrointestinal Conditions**

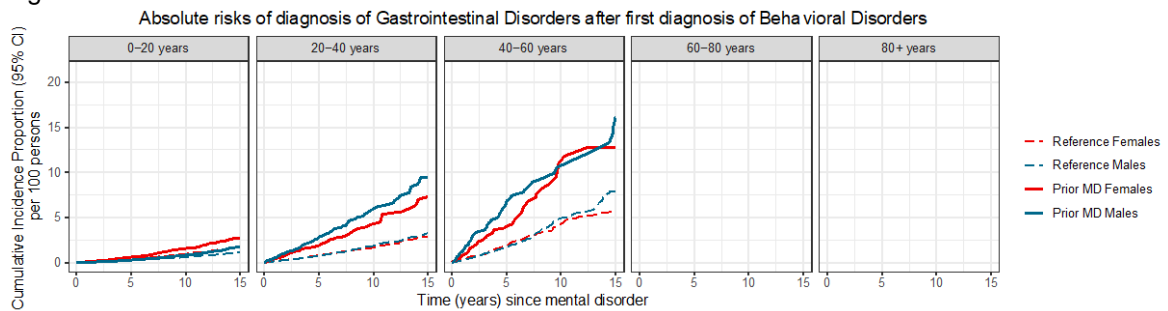

Figure S98.5 – Urogenital Conditions

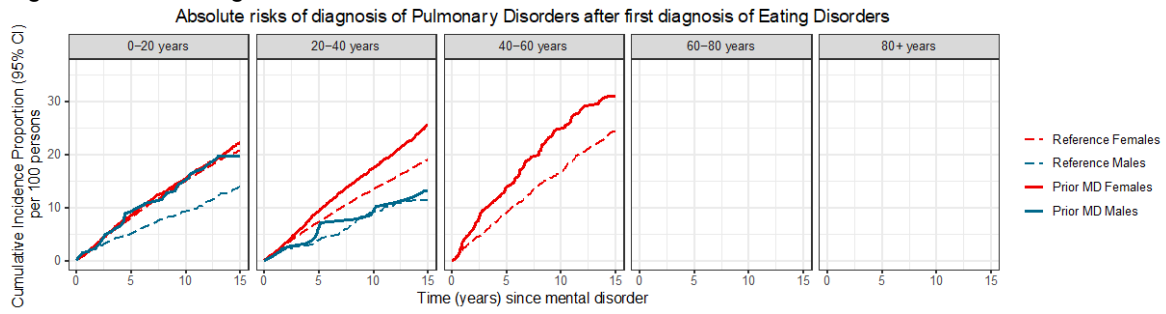

Figure S98.6 – Musculoskeletal Conditions

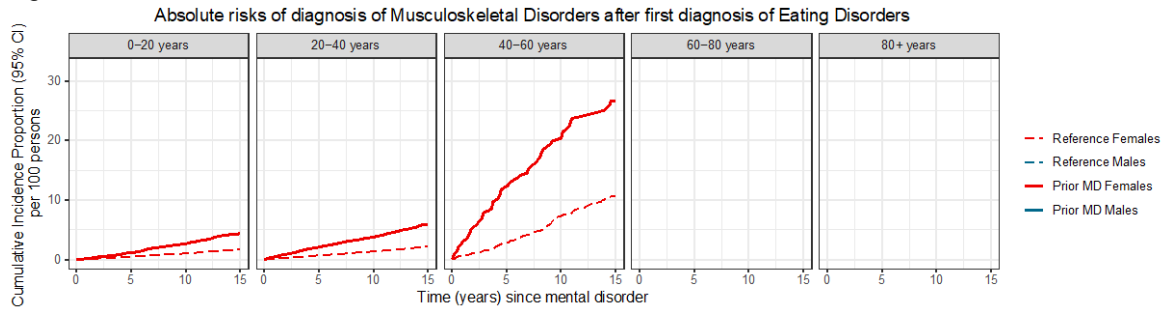

Figure S98.7 – Hematological Conditions

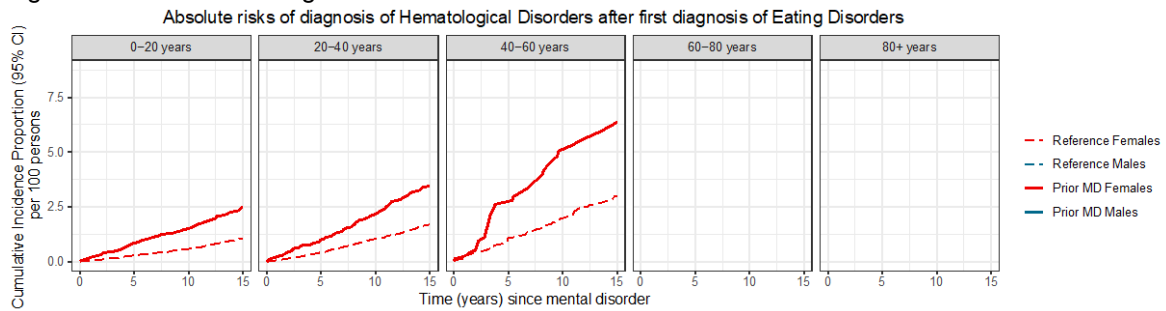

Figure S98.8 – Cancers

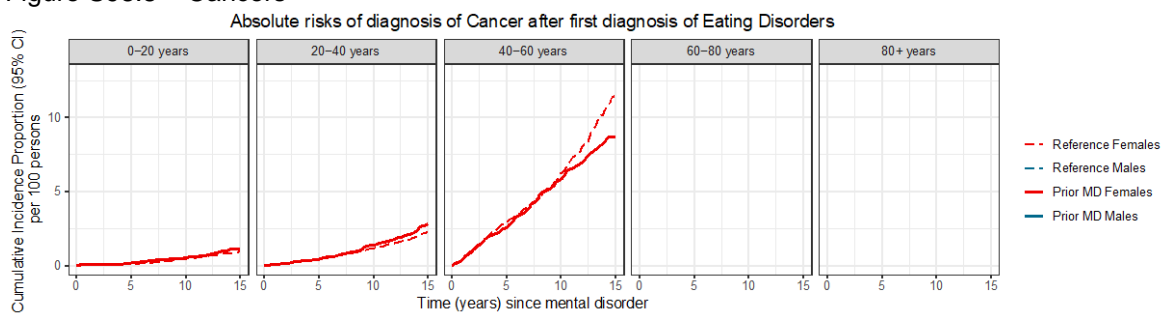

Figure S98.9 – Neurological Conditions

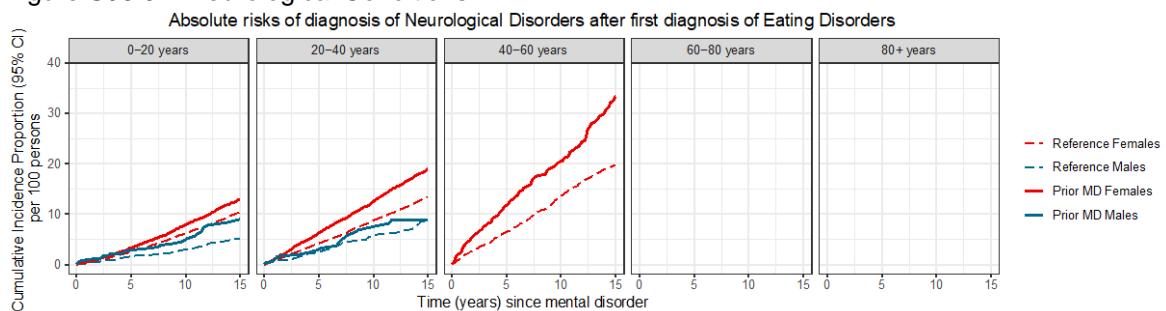

**Figures S99.1-S99.9. Absolute risks of being diagnosed with general medical conditions after first diagnosis of Personality Disorder**

**Figure S99.1 – Circulatory Conditions**

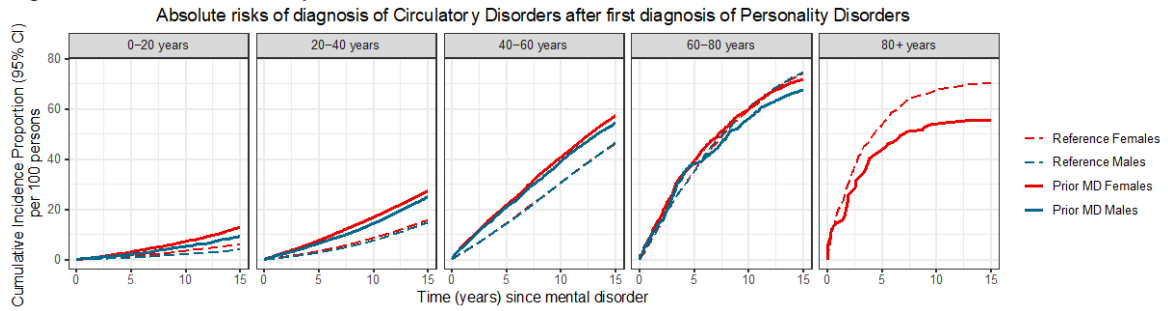

**Figure S99.2 – Endocrine Conditions**

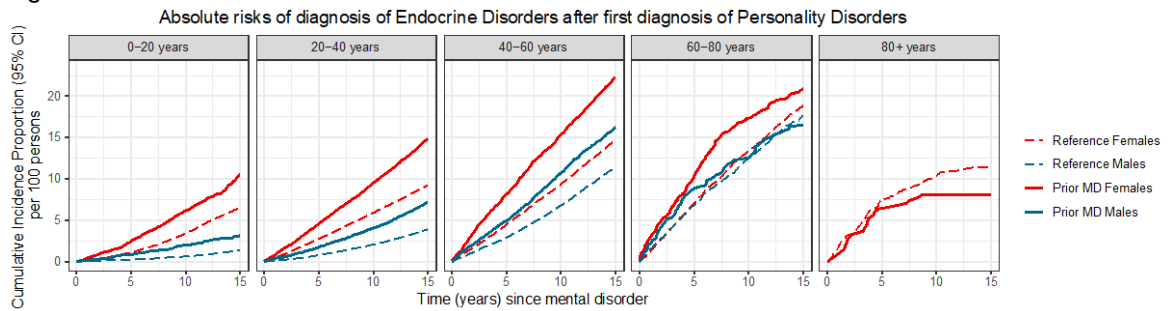

**Figure S99.3 – Pulmonary Conditions**

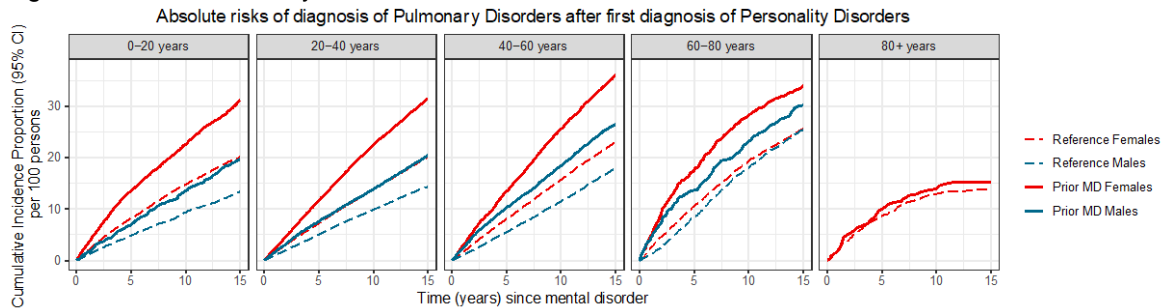

**Figure S99.4 – Gastrointestinal Conditions**

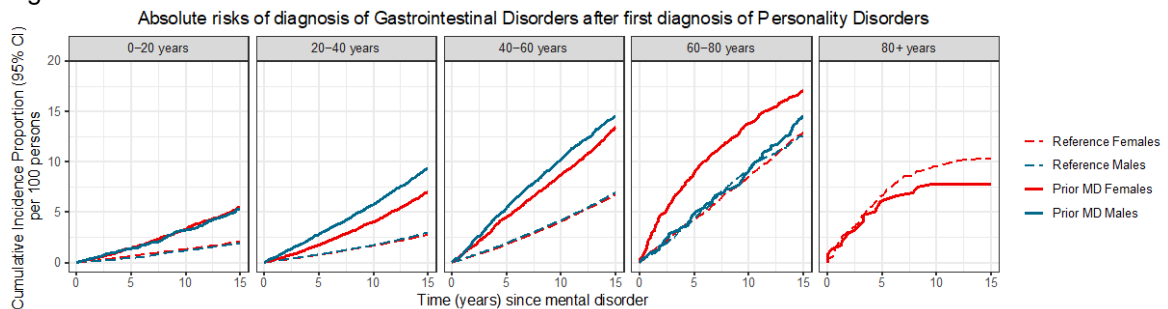

Figure S99.5 – Urogenital Conditions

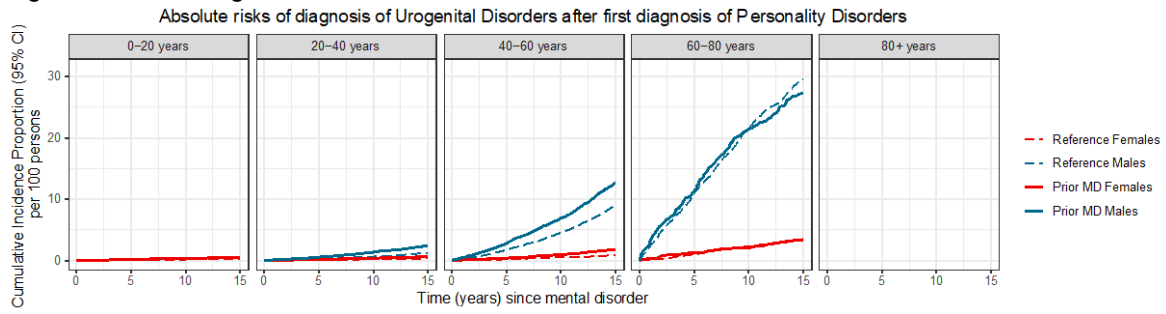

Figure S99.6 – Musculoskeletal Conditions

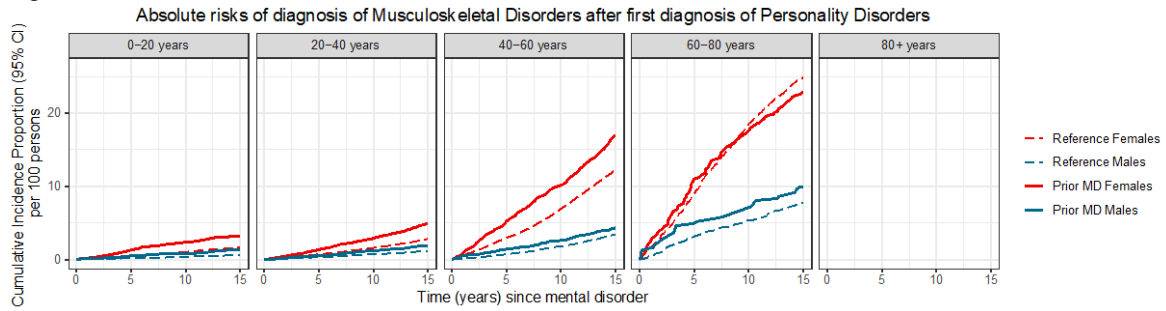

Figure S99.7 – Hematological Conditions

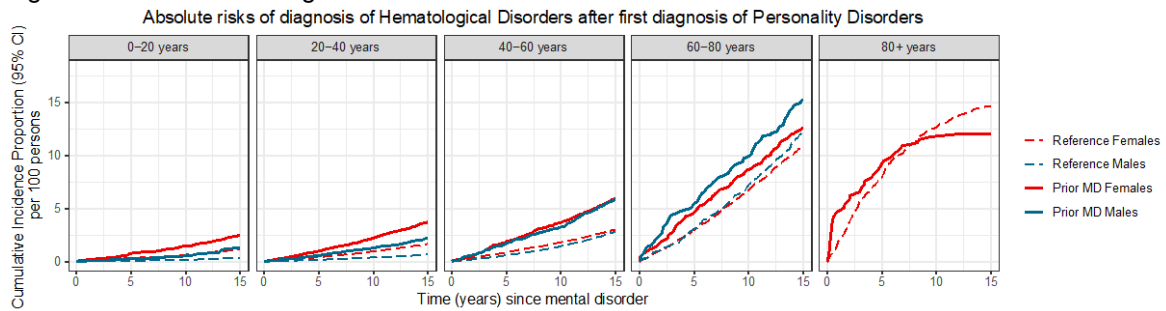

Figure S99.8 – Cancers

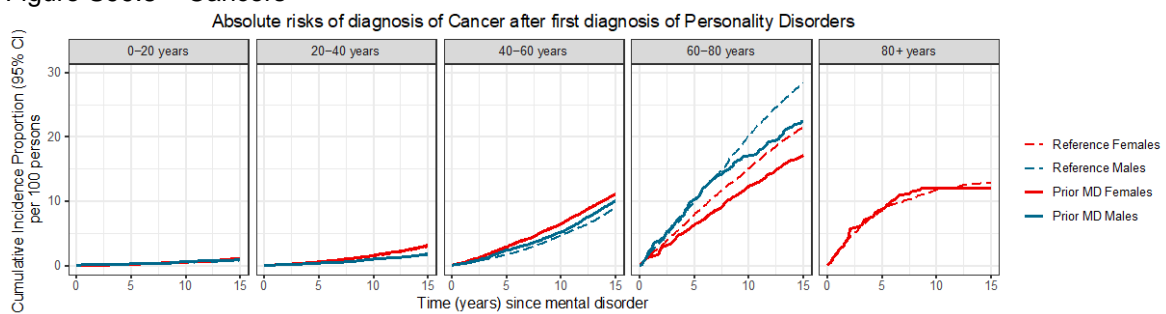

Figure S99.9 – Neurological Conditions

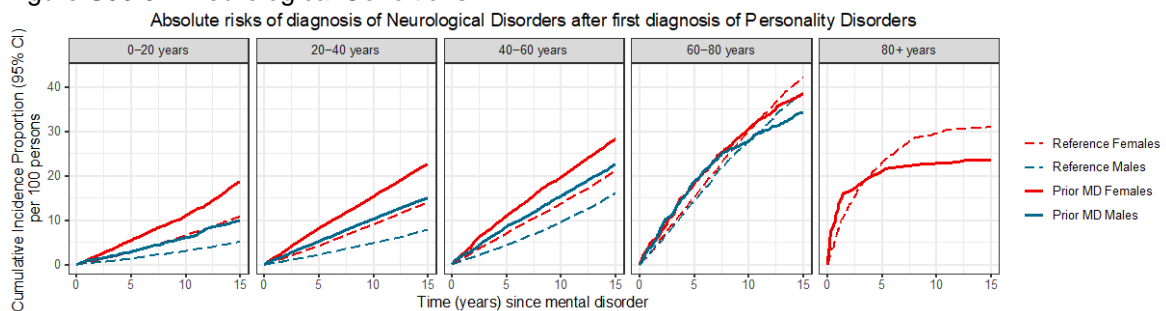



**Figures S100.1-100.9. Absolute risks of being diagnosed with general medical conditions after first diagnosis of Intellectual Disabilities**

**Figure S100.1 – Circulatory Conditions**

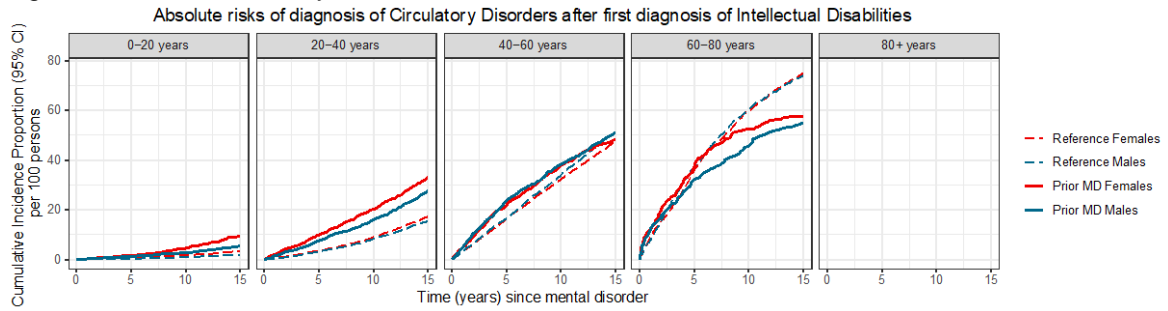

**Figure S100.2 – Endocrine Conditions**

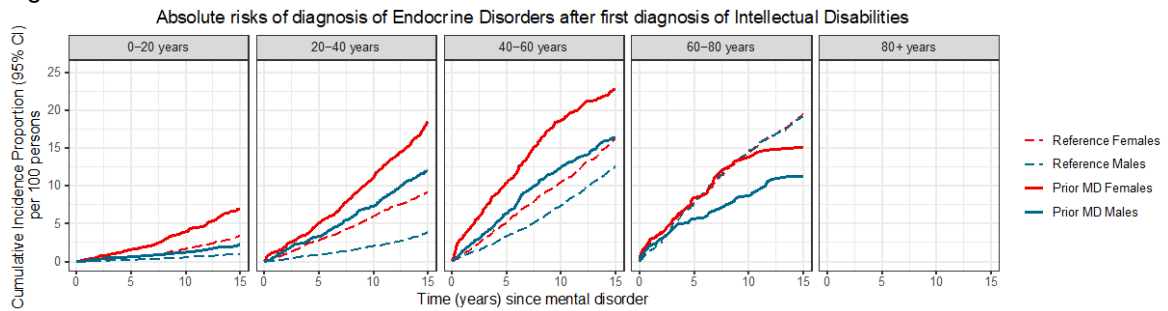

**Figure S100.3 – Pulmonary Conditions**

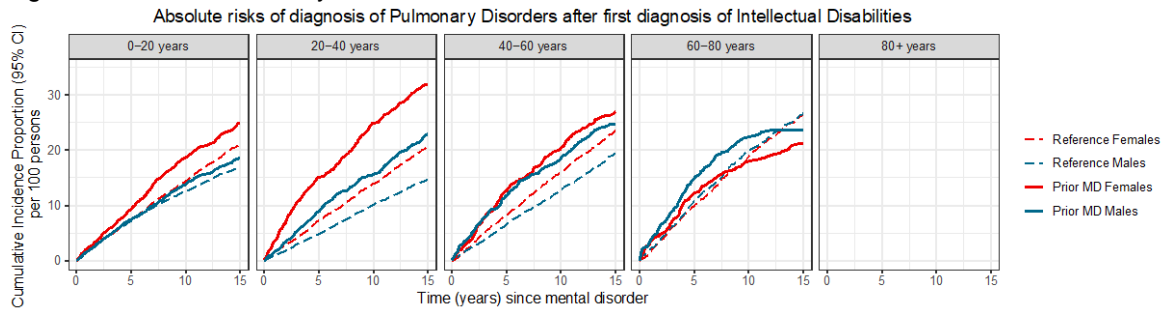

**Figure S100.4 – Gastrointestinal Conditions**

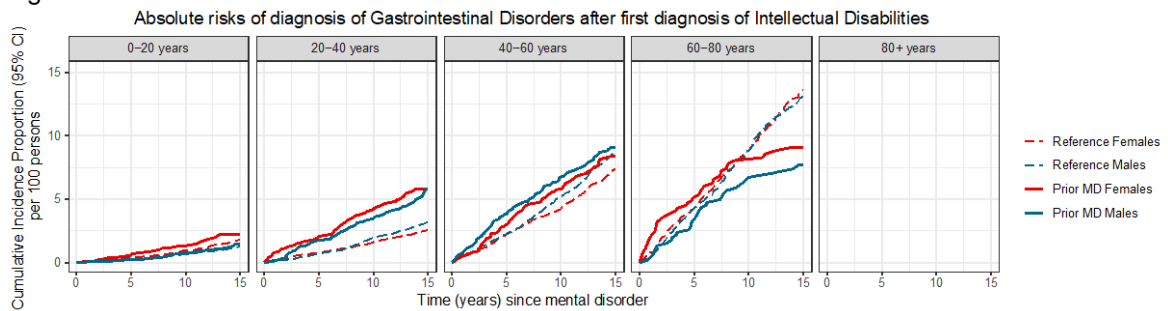

Figure S100.5 – Urogenital Conditions

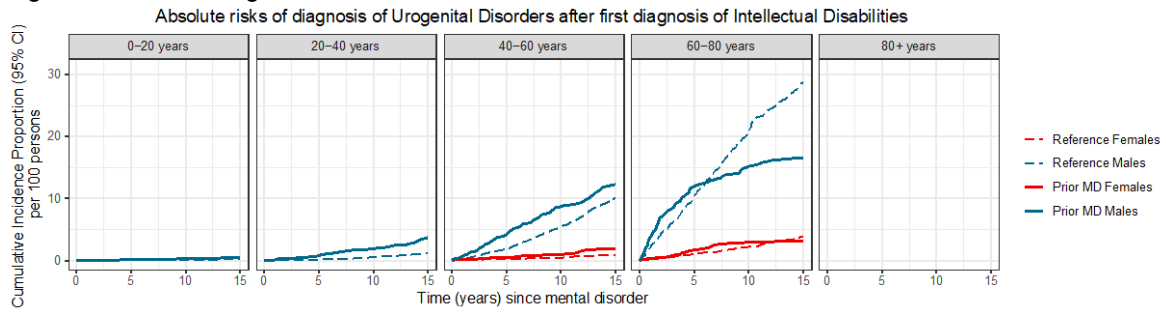

Figure S100.6 – Musculoskeletal Conditions

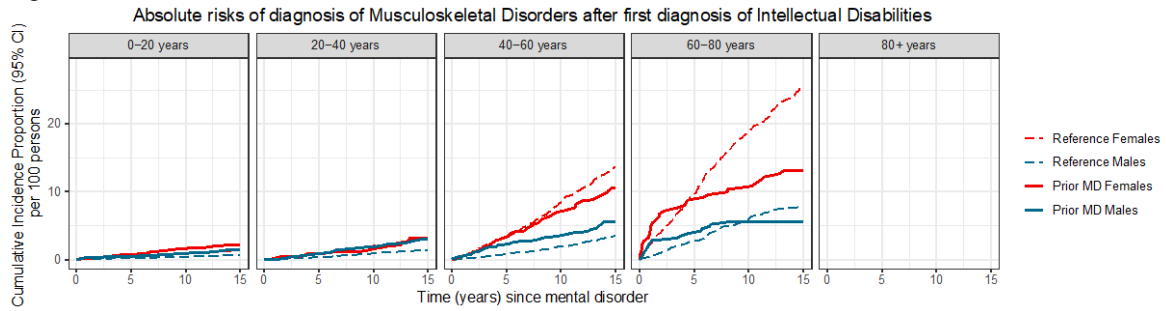

Figure S100.7 – Hematological Conditions

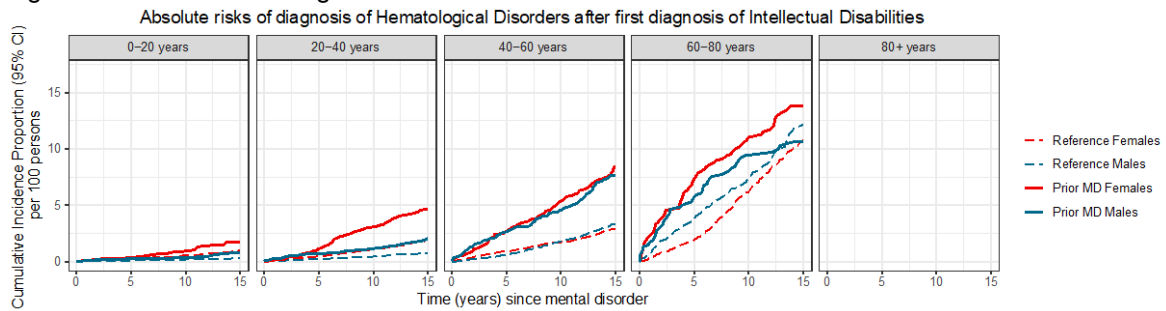

Figure S100.8 – Cancers

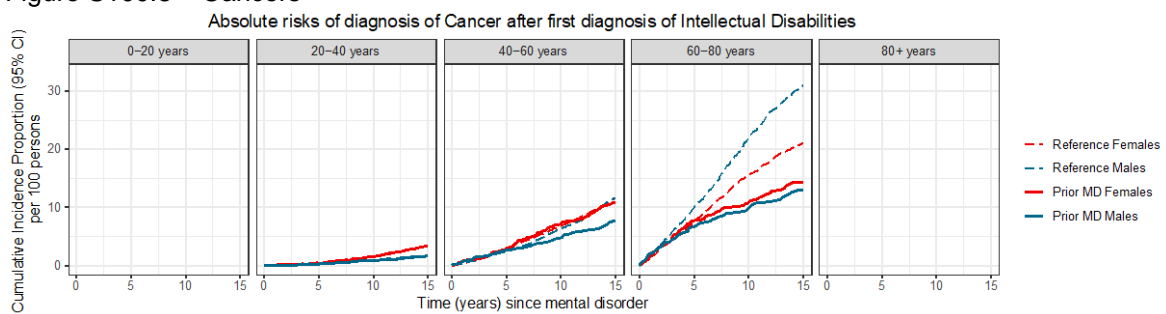

Figure S100.9 – Neurological Conditions

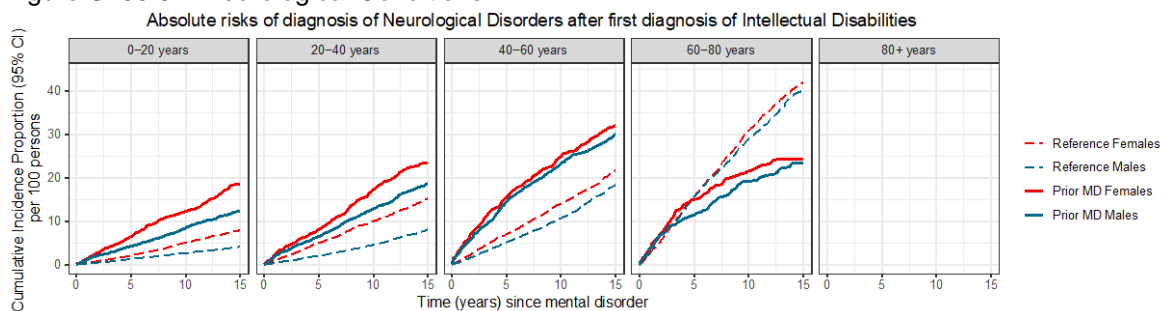

**Figures S101.1-101.9. Absolute risks of being diagnosed with general medical conditions after first diagnosis of Developmental Disorder**

**Figure S101.1 – Circulatory Conditions**

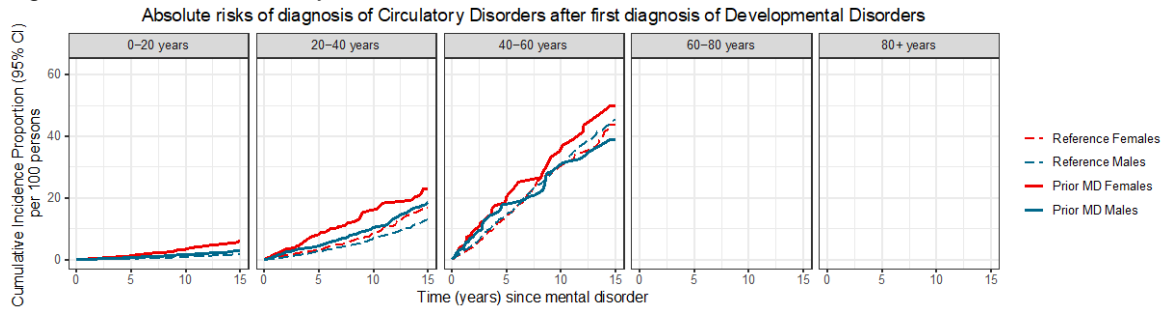

**Figure S101.2 – Endocrine Conditions**

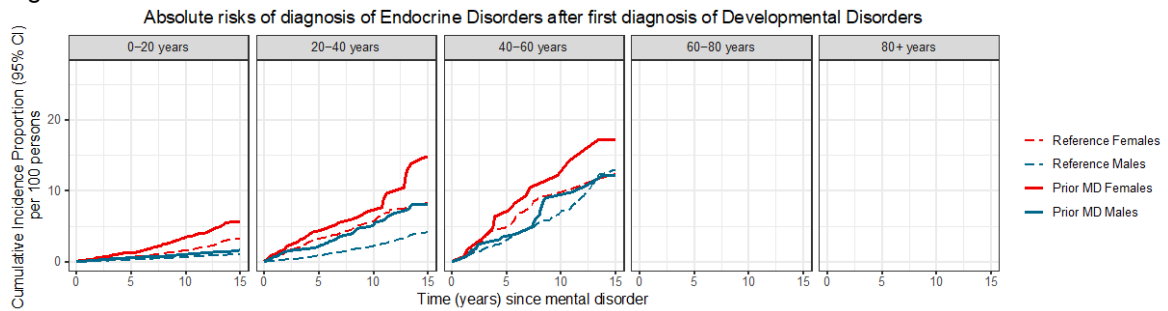

**Figure S101.3 – Pulmonary Conditions**

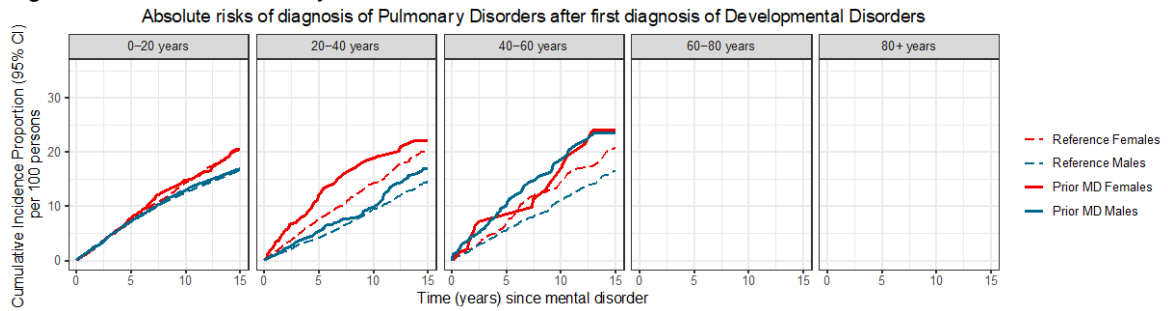

**Figure S101.4 – Gastrointestinal Conditions**

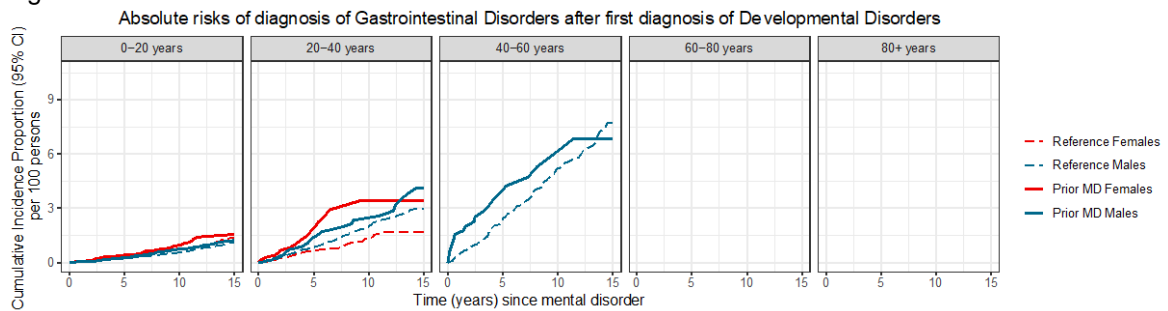

Figure S101.5 – Urogenital Conditions

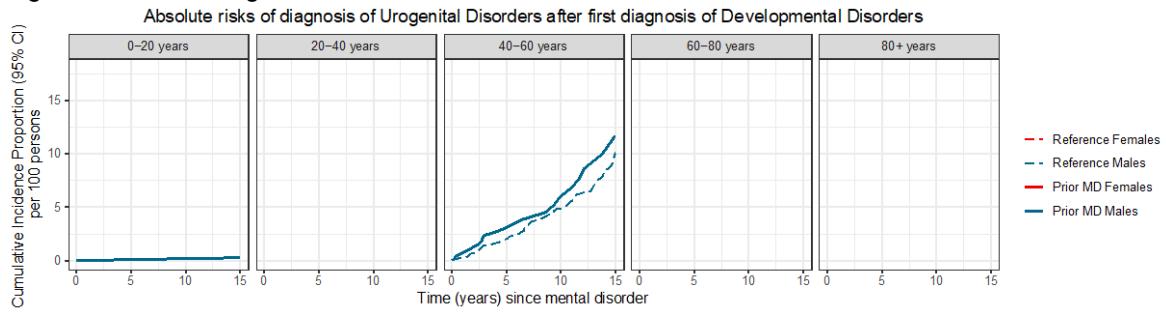

Figure S101.6 – Musculoskeletal Conditions

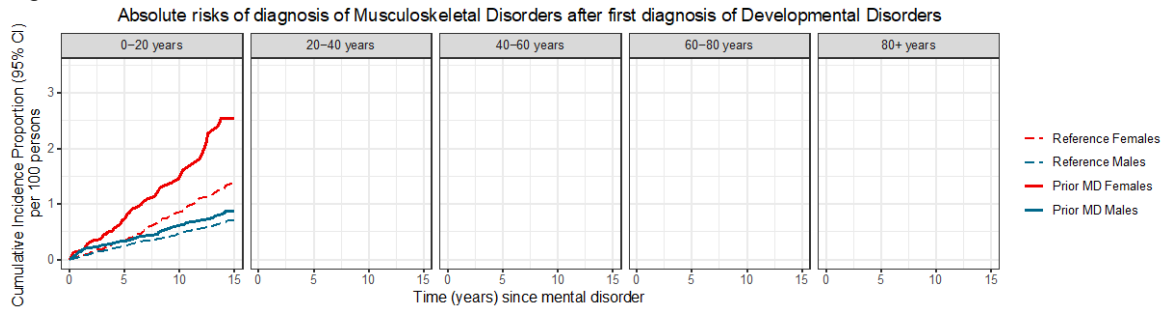

Figure S101.7 – Hematological Conditions

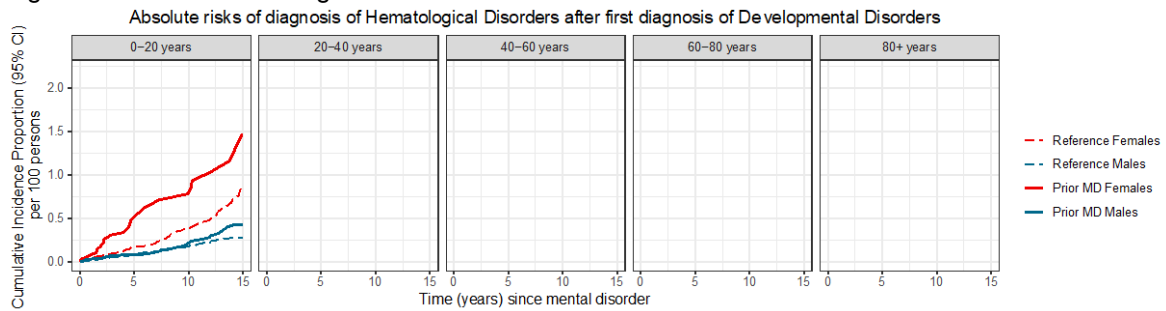

Figure S101.8 – Cancers

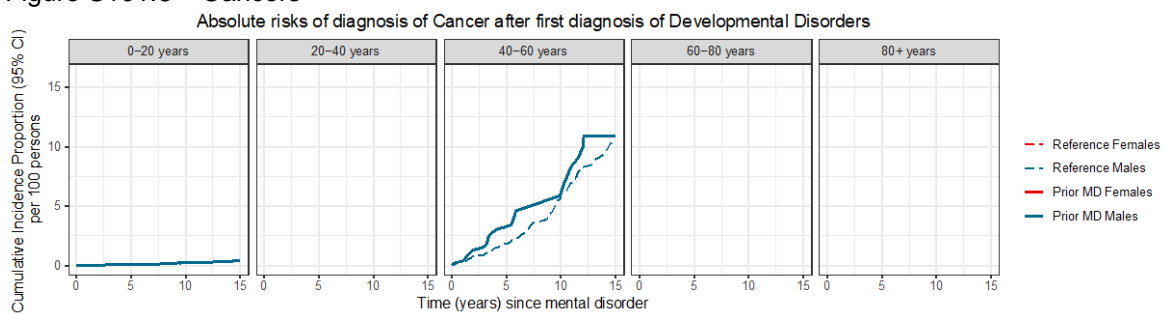

Figure S101.9 – Neurological Conditions

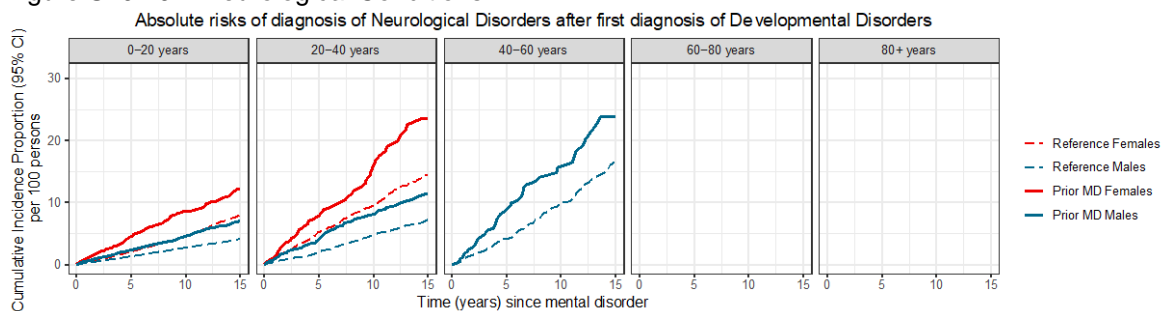

**Figures S102.1-102.9. Absolute risks of being diagnosed with general medical conditions after first diagnosis of Behavioral Disorder**

**Figure S102.1 – Circulatory Conditions**

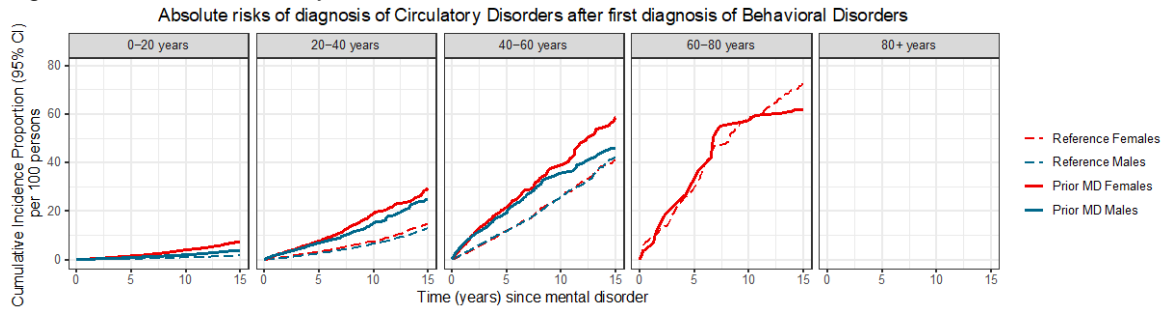

**Figure S102.2 – Endocrine Conditions**

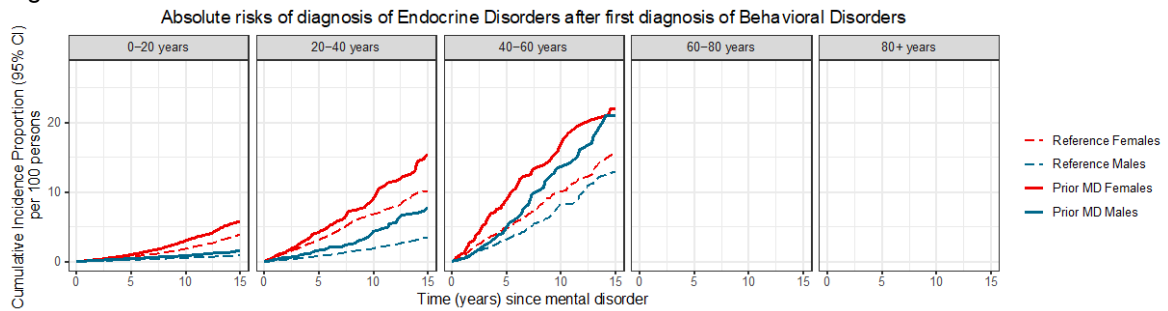

**Figure S102.3 – Pulmonary Conditions**

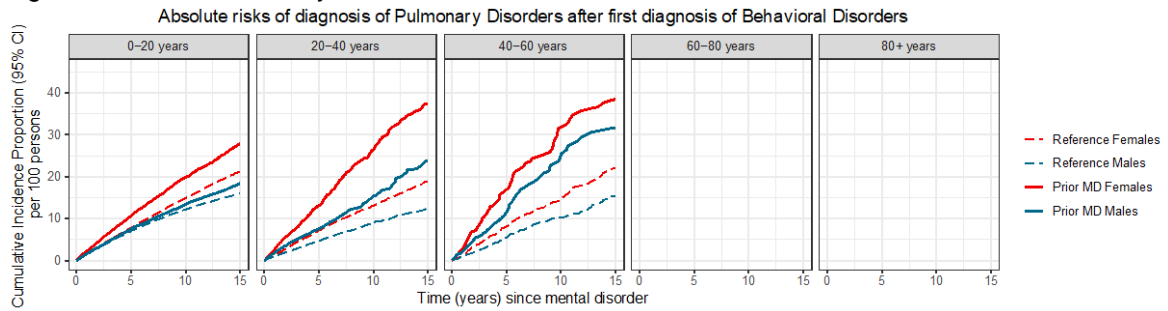

**Figure S102.4 – Gastrointestinal Conditions**



Figure S102.5 – Urogenital Conditions

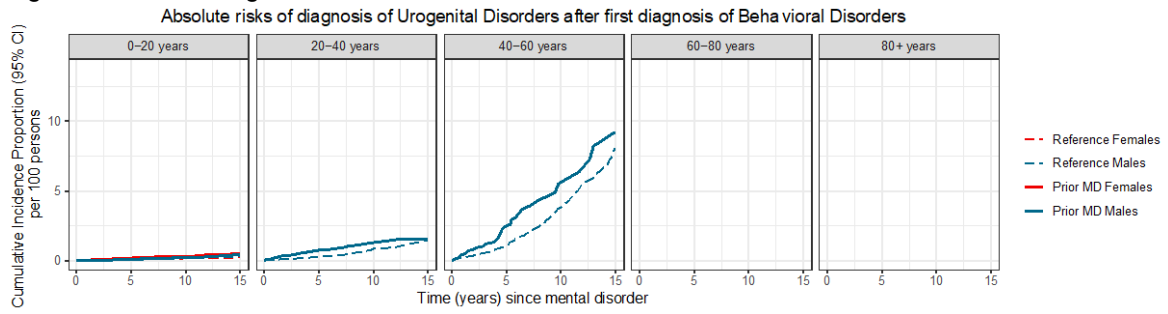

Figure S102.6 – Musculoskeletal Conditions

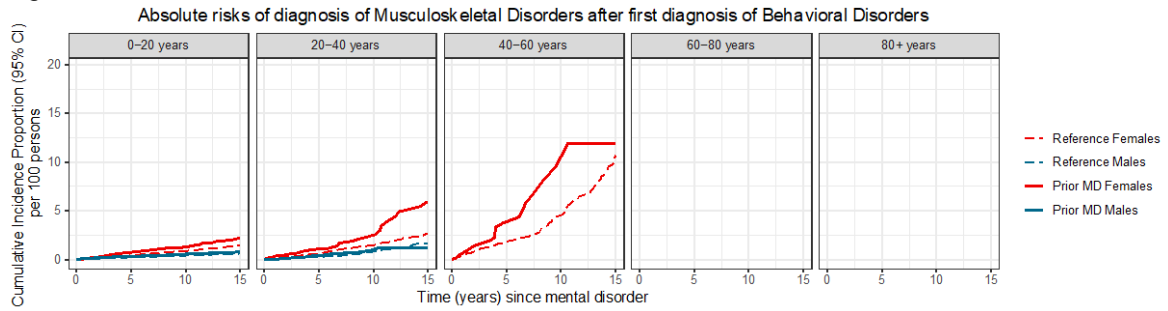

Figure S102.7 – Hematological Conditions

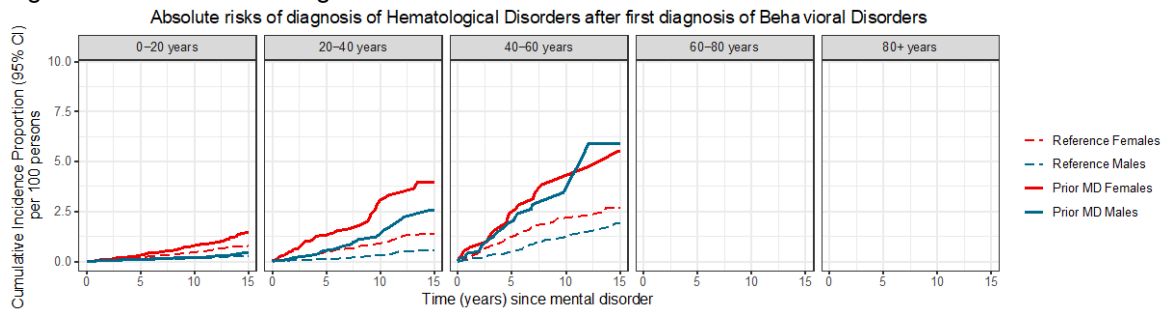

Figure S102.8 – Cancers

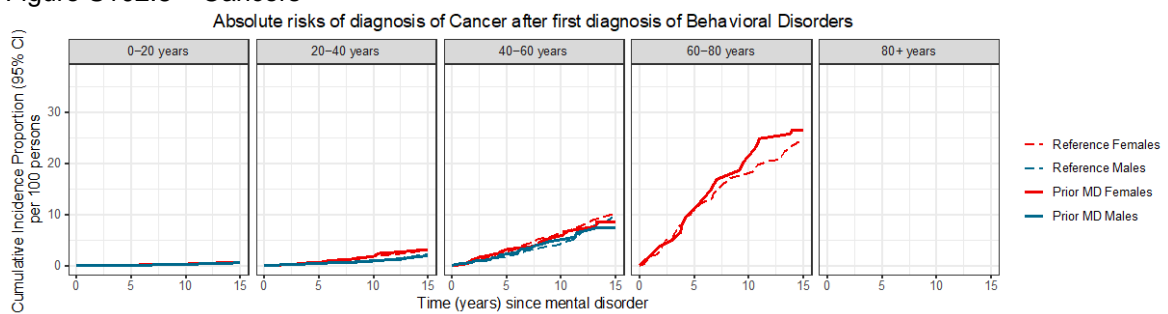

Figure S102.9 – Neurological Conditions

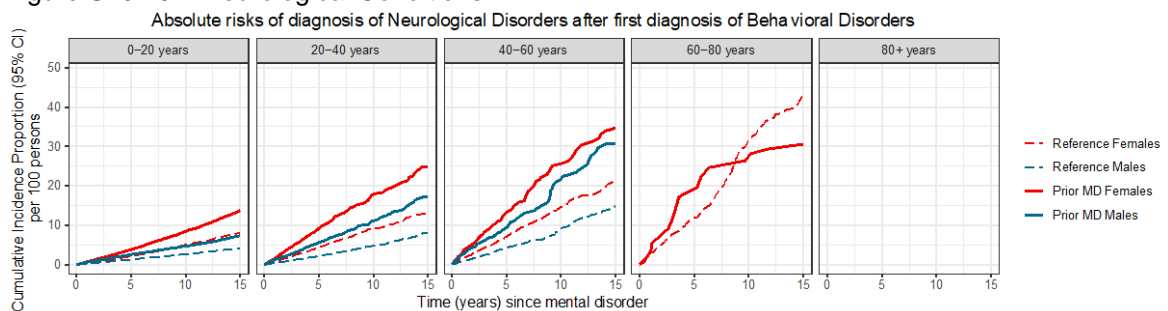

**Figures S103-S122. Absolute risks of specific general medical conditions after a diagnosis of a mental disorder**

The following set of figures shows the sex- and time-specific absolute risks of being diagnosed with general medical conditions after being previously diagnosed with one of the mental disorders, organized by general medical condition category. They show the cumulative incidence proportions (CIPs) and 95% confidence intervals (95% CIs) estimated across all ages of being diagnosed with each general medical condition (shown as label at the top of each panel). Each person diagnosed with a specific mental disorder was matched to up to five 'reference individuals' of the same sex and born within 30 days of them. CIPs are shown for both those who were diagnosed with a specific mental disorder from the time of diagnosis (bold, solid line) and the reference group (dashed lines).

Two graphs are provided for each mental disorder: CIPs for all persons (black lines) and sex-specific CIPs (males indicated by blue lines, females by red). Confidence intervals are displayed only for those with prior mental disorder, as the 95% CIs for the reference group will be proportional to those for people with prior mental disorders, but smaller. In some cases, 95% CIs are too small to be visible.

The horizontal axes show the time since first diagnosis of the mental disorder (or since diagnosis of the person reference individuals were matched to). The vertical axes show the cumulative incidence proportions and 95% CIs (note these axes vary for each set of graphs).

Estimates with fewer than 50 persons at risk or fewer than 15 cases are not shown. Where numbers were too small to show CIPs for those with mental disorders, reference CIPs are not displayed either.

*Displaying estimates for all persons*

*The y-axis varies for each graph, however they range from 0 to a maximum of 59*

- S103. Organic Disorders
- S104. Substance Use Disorders
- S105. Schizophrenia
- S106. Mood Disorders
- S107. Neurotic Disorders
- S108. Eating Disorders
- S109. Personality Disorders
- S110. Intellectual Disorders
- S111. Developmental Disorders
- S112. Behavioral Disorders

*Displaying sex-specific estimates*

*The y-axis varies for each graph, however they range from 0 to a maximum of 66*

- S113. Organic Disorders
- S114. Substance Use Disorders
- S115. Schizophrenia
- S116. Mood Disorders
- S117. Neurotic Disorders
- S118. Eating Disorders
- S119. Personality Disorders
- S120. Intellectual Disorders
- S121. Developmental Disorders
- S122. Behavioral Disorders

**Figures S103.1-S103.9. Absolute risks of being diagnosed with general medical conditions after a first diagnosis of Organic Disorders**

**Figure S103.1 – Circulatory Conditions**

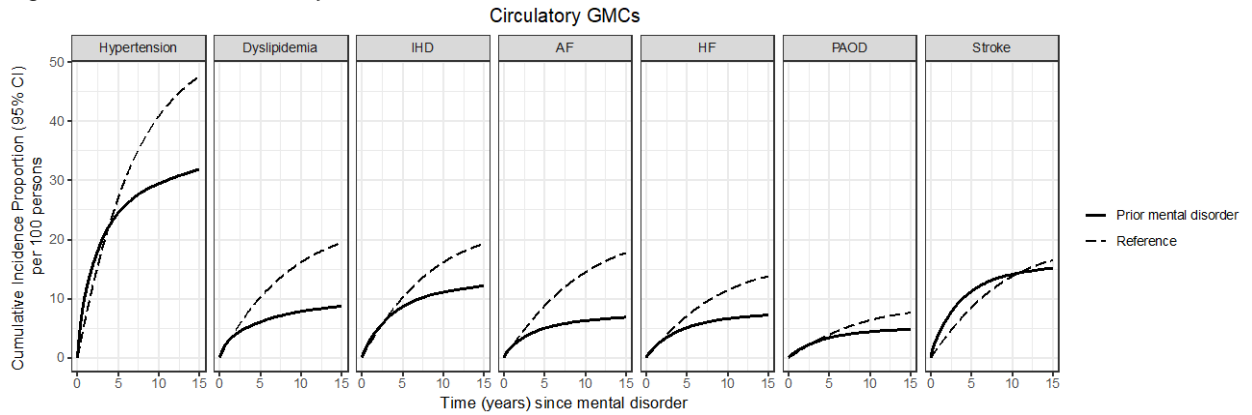

**Figure S103.2 – Endocrine Conditions**

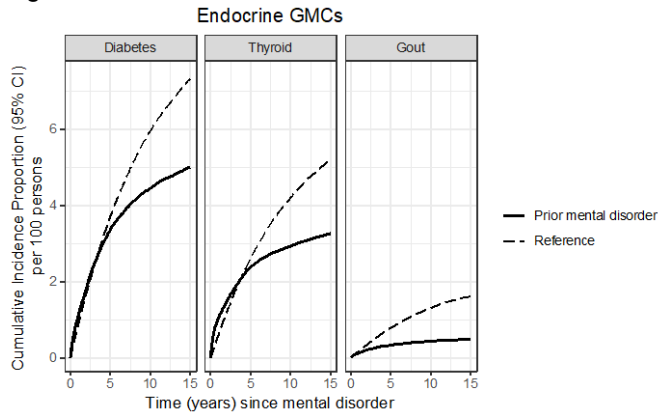

**Figure S103.3 – Pulmonary Conditions**

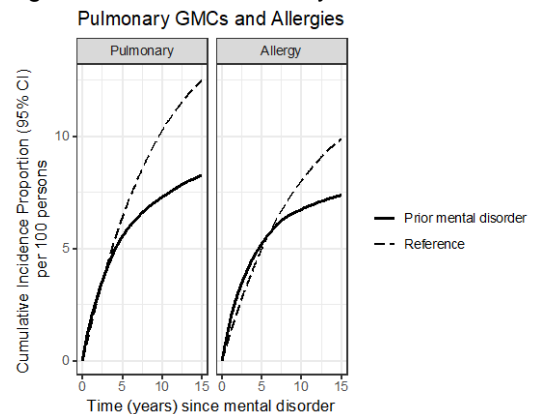

**Figure S103.4 – Gastrointestinal Conditions**

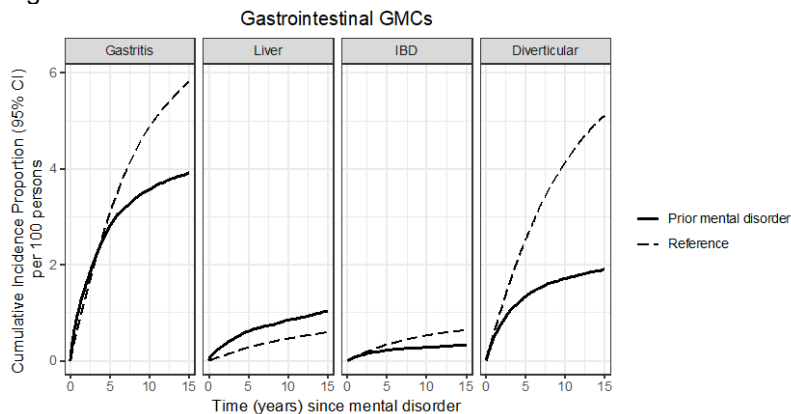



Figure S103.5 – Urogenital Conditions  
Urogenital GMCs

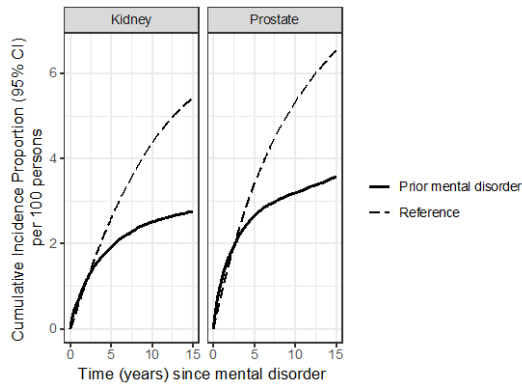

Figure S103.6 – Musculoskeletal Conditions  
Musculoskeletal GMCs

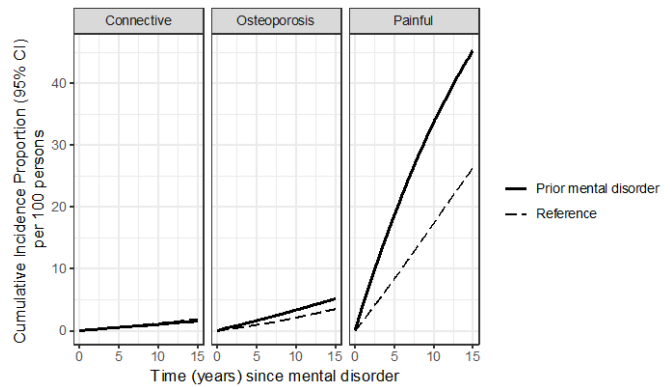

Figure S103.7 – Hematological Conditions  
Hematological GMCs

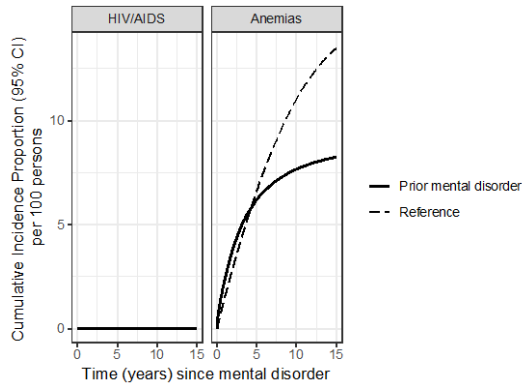

Figure S103.8 – Cancers  
Cancer

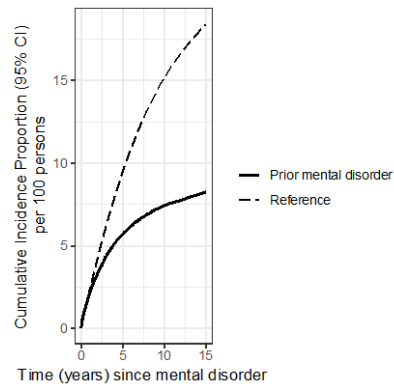

Figure S103.9 – Neurological Conditions  
Neurological GMCs

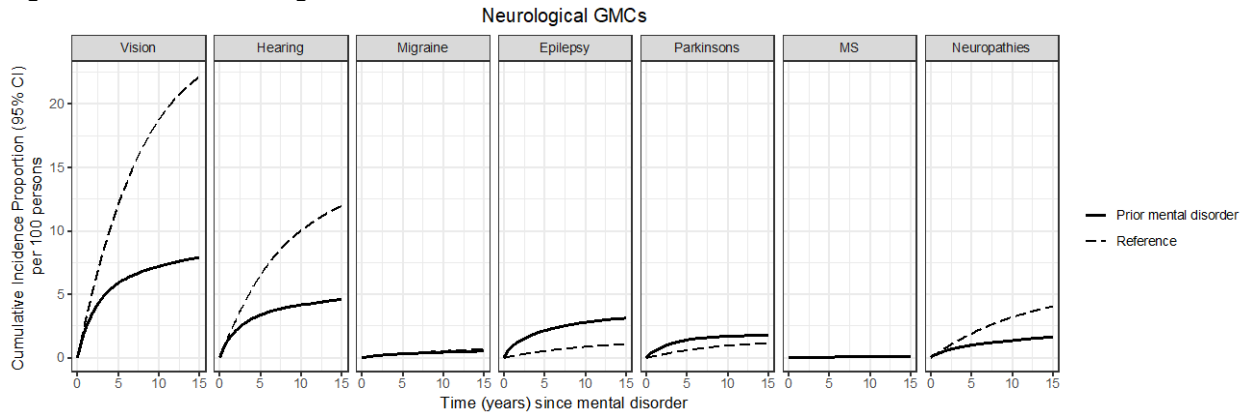

**Figures S104.1-S104.9. Absolute risks of being diagnosed with general medical conditions after a first diagnosis of Substance Use Disorders**

**Figure S104.1 – Circulatory Conditions**

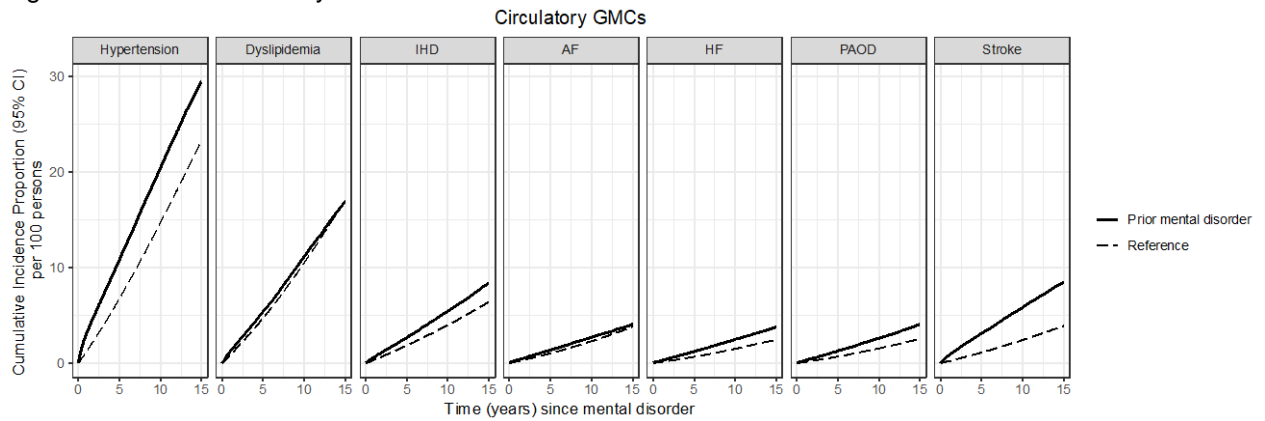

**Figure S104.2 – Endocrine Conditions**

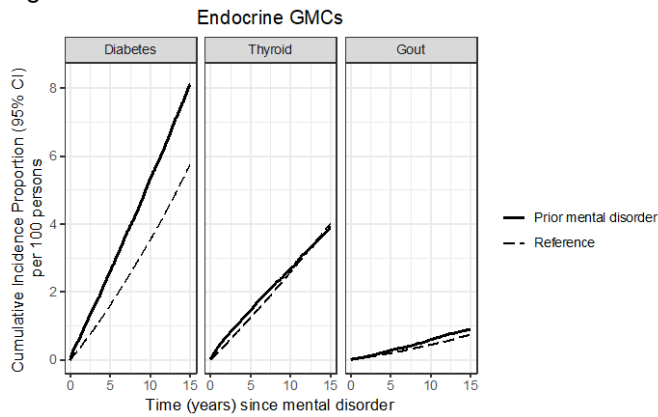

**Figure S104.3 – Pulmonary Conditions**

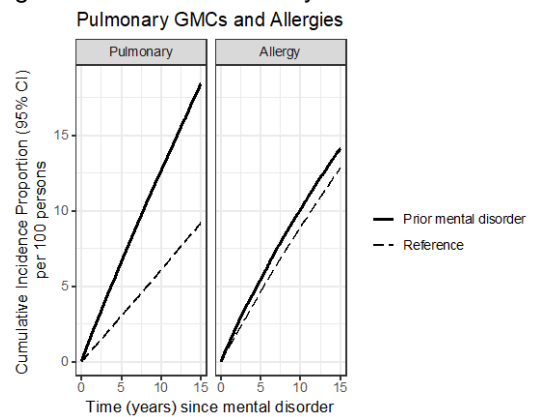

**Figure S104.4 – Gastrointestinal Conditions**

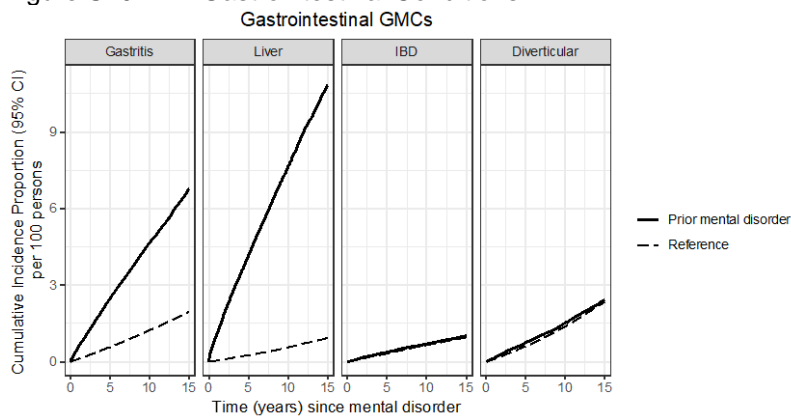

Figure S104.5 – Urogenital Conditions

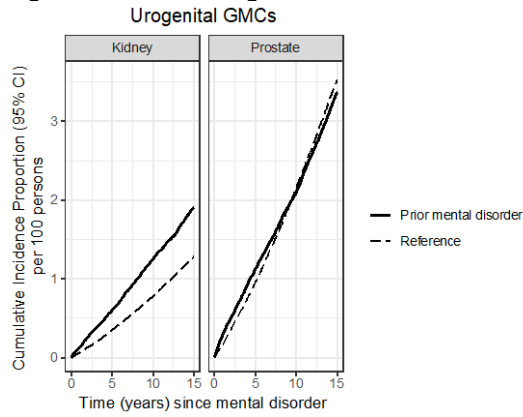

Figure S104.6 – Musculoskeletal Conditions

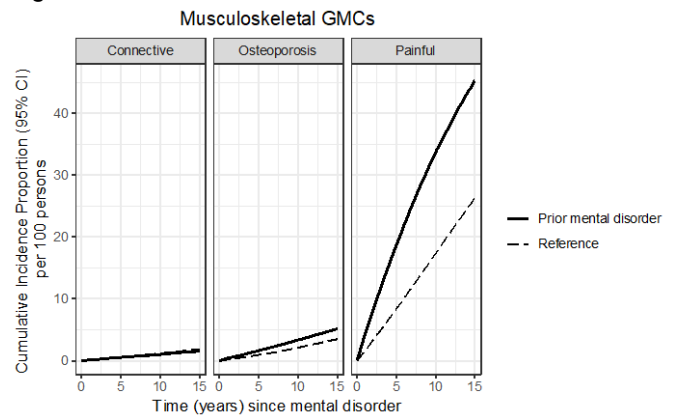

Figure S104.7 – Hematological Conditions

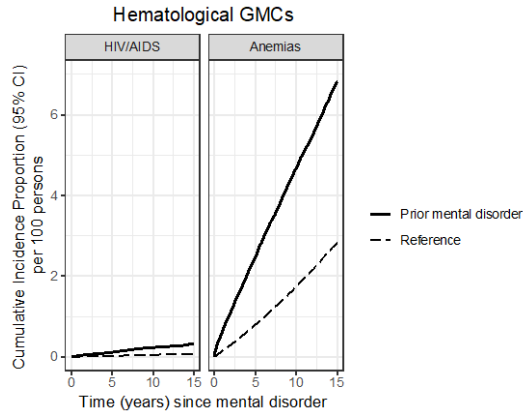

Figure S104.8 – Cancer

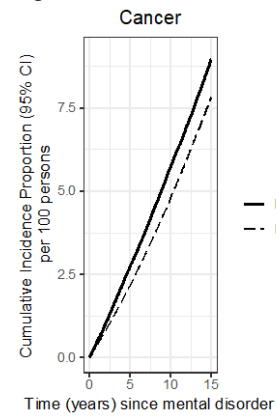

Figure S104.9 – Neurological Conditions

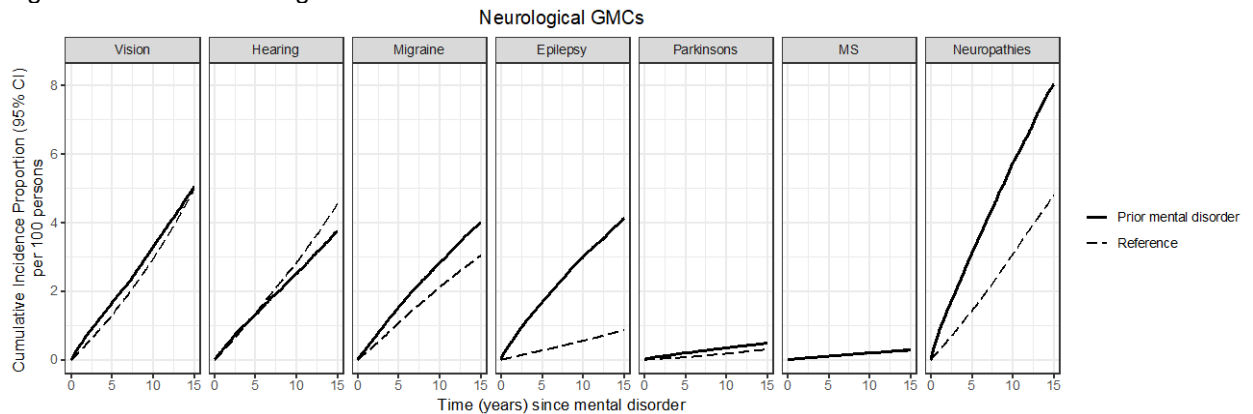

**Figures S105.1-S105.9. Absolute risks of being diagnosed with general medical conditions after a first diagnosis of Schizophrenia**

**Figure S105.1 – Circulatory Conditions**

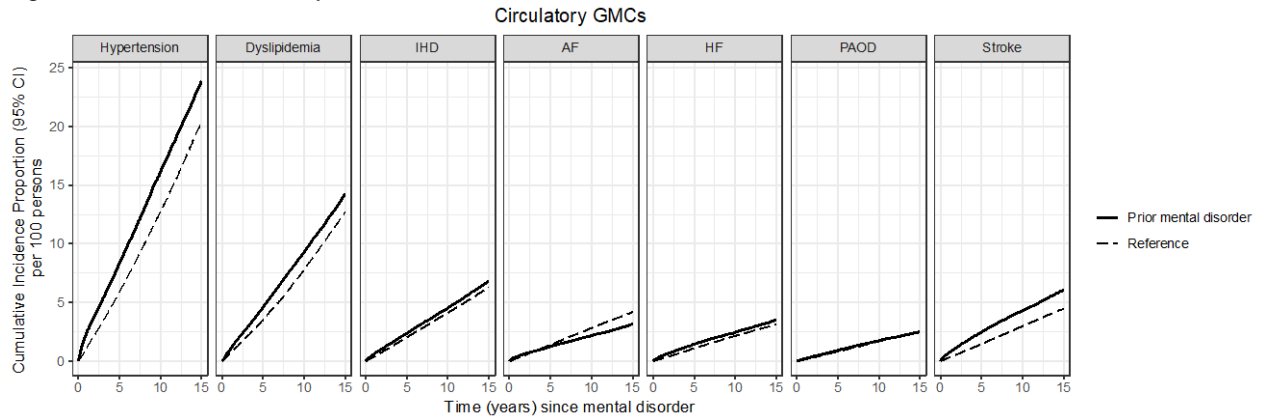

**Figure S105.2 – Endocrine Conditions**

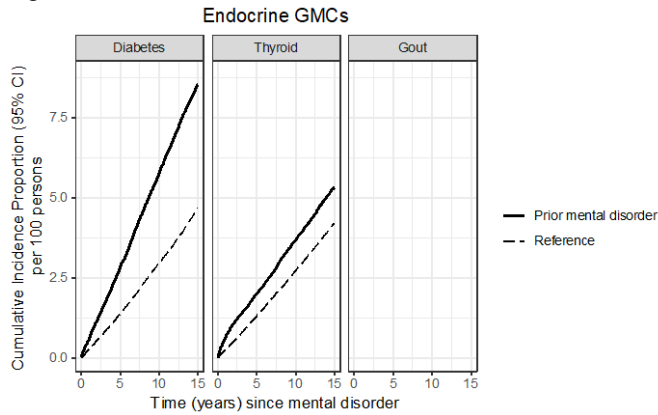

**Figure S105.3 – Pulmonary Conditions**

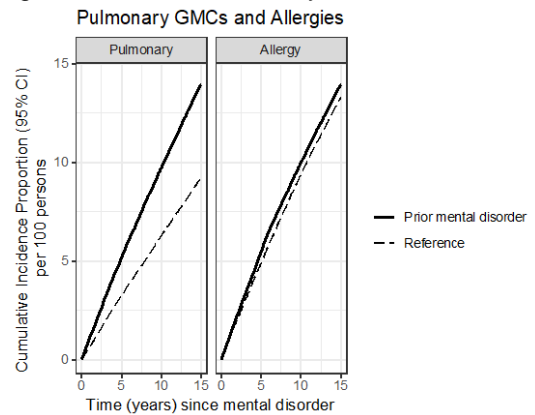

**Figure S105.4 – Gastrointestinal Conditions**

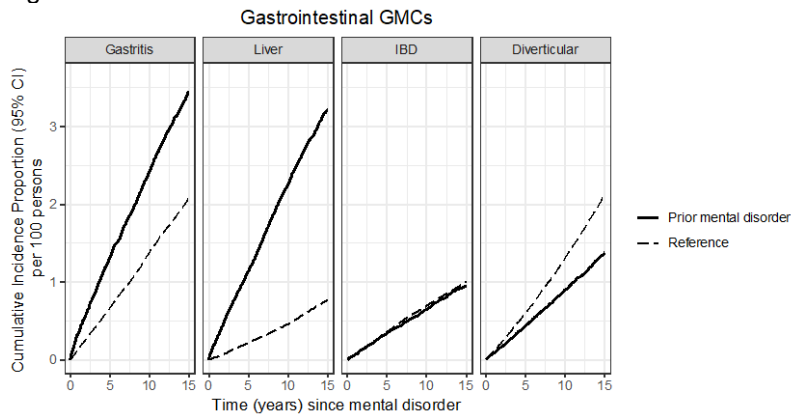

Figure S105.5 – Urogenital Conditions  
Urogenital GMCs

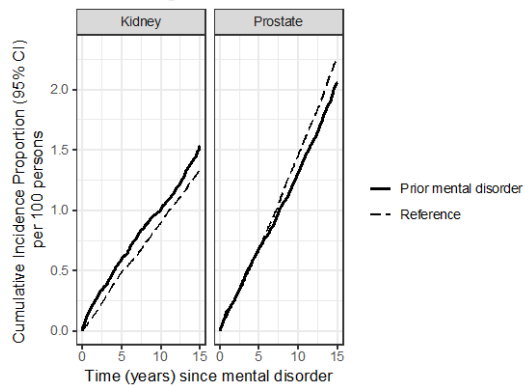

Figure S105.6 – Musculoskeletal Conditions  
Musculoskeletal GMCs

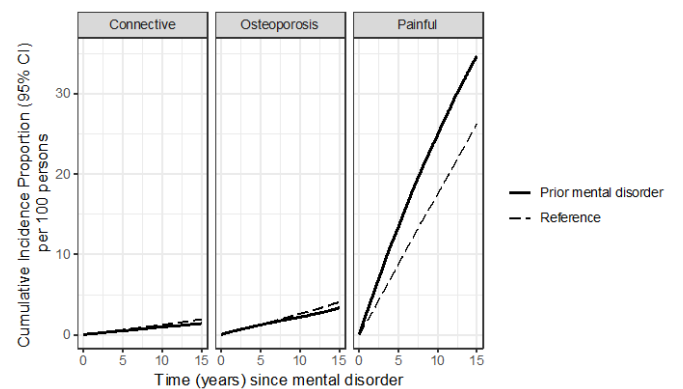

Figure S105.7 – Hematological Conditions  
Hematological GMCs

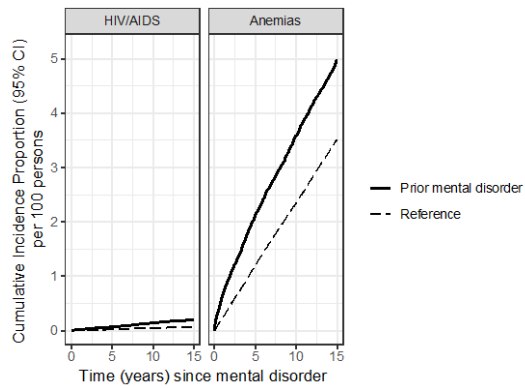

Figure S105.8 – Cancers  
Cancer

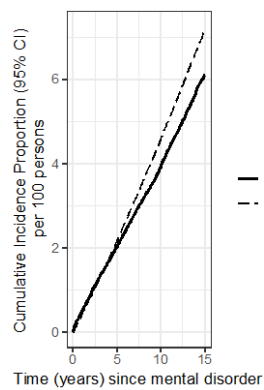

Figure S105.9 – Neurological Conditions  
Neurological GMCs

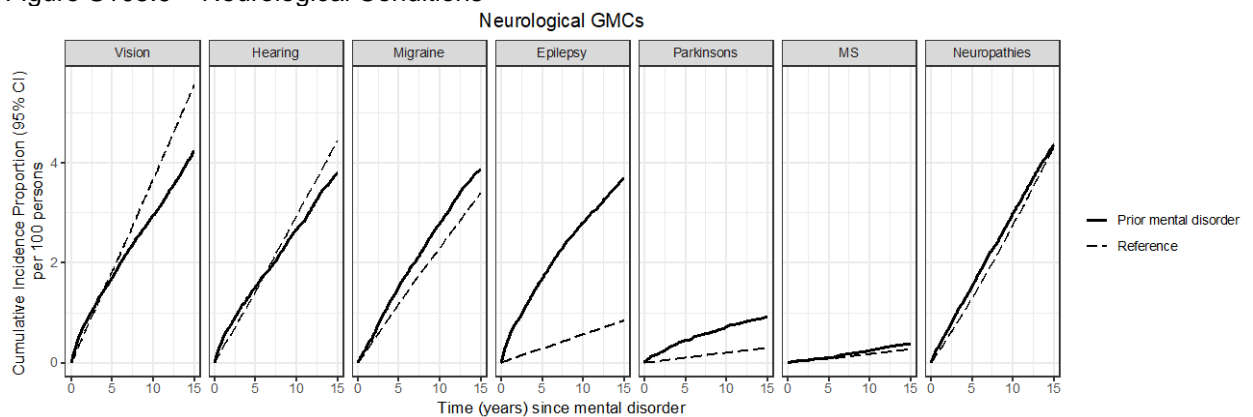

**Figures S106.1-S106.9. Absolute risks of being diagnosed with general medical conditions after a first diagnosis of Mood Disorders**

**Figure S106.1 – Circulatory Conditions**

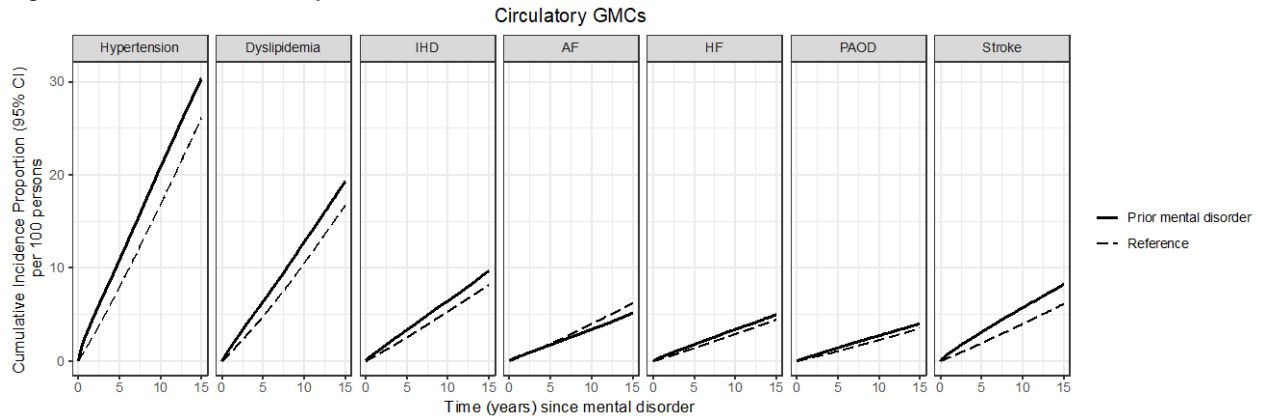

**Figure S106.2 – Endocrine Conditions**

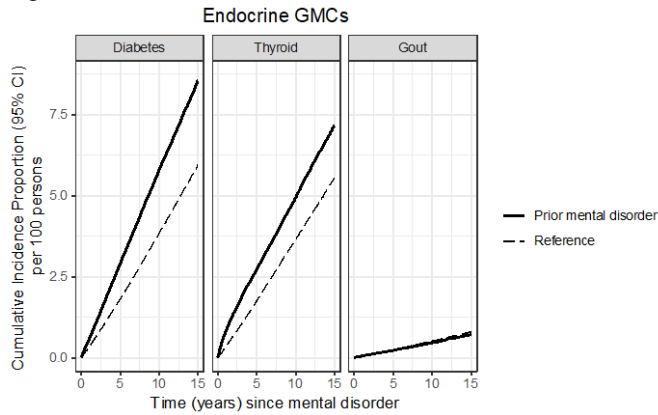

**Figure S106.3 – Pulmonary Conditions**

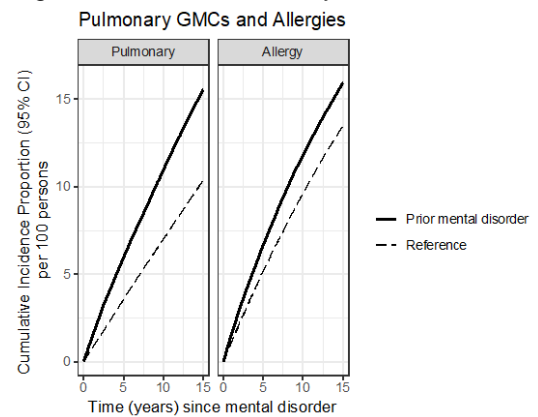

**Figure S106.4 – Gastrointestinal Conditions**

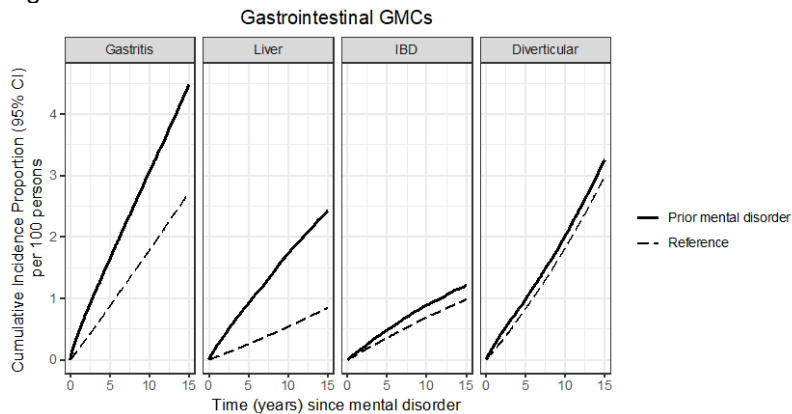

Figure S106.5 – Urogenital Conditions    Figure S106.6 – Musculoskeletal Conditions

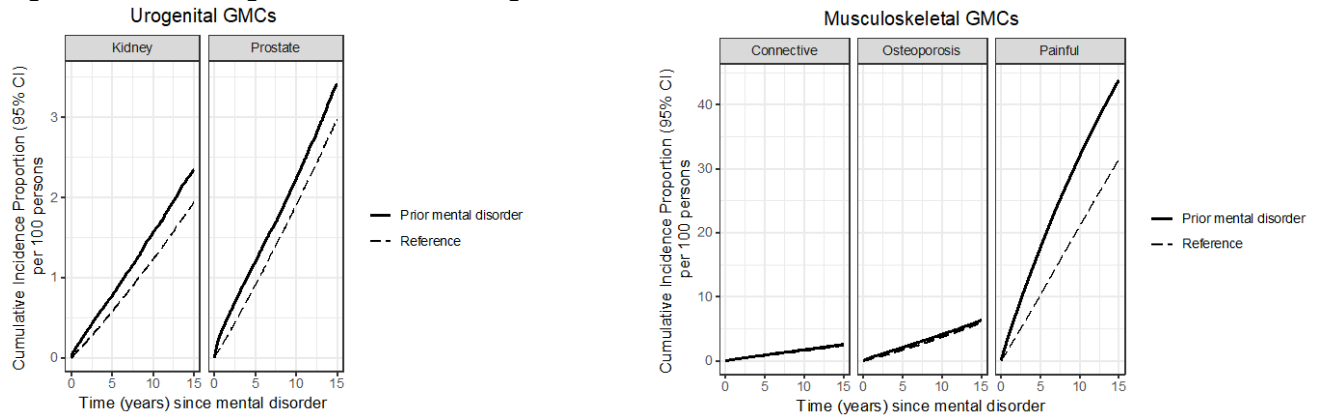

Figure S106.7 – Hematological Conditions

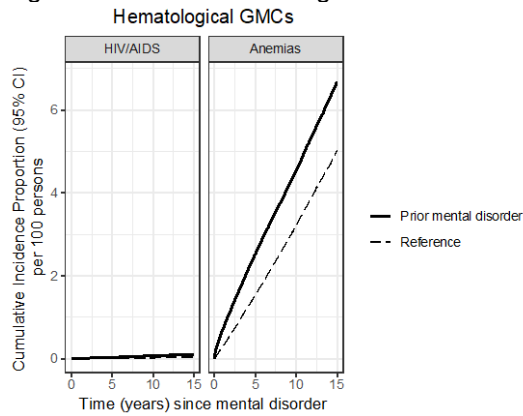

Figure S106.8 – Cancers

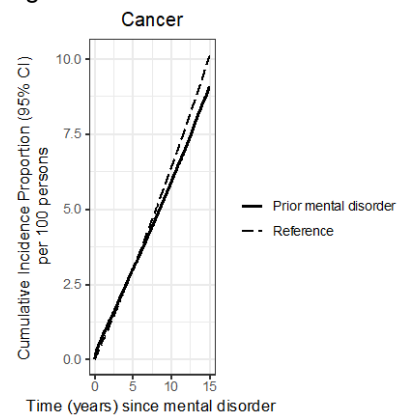

Figure S106.9 – Neurological Conditions

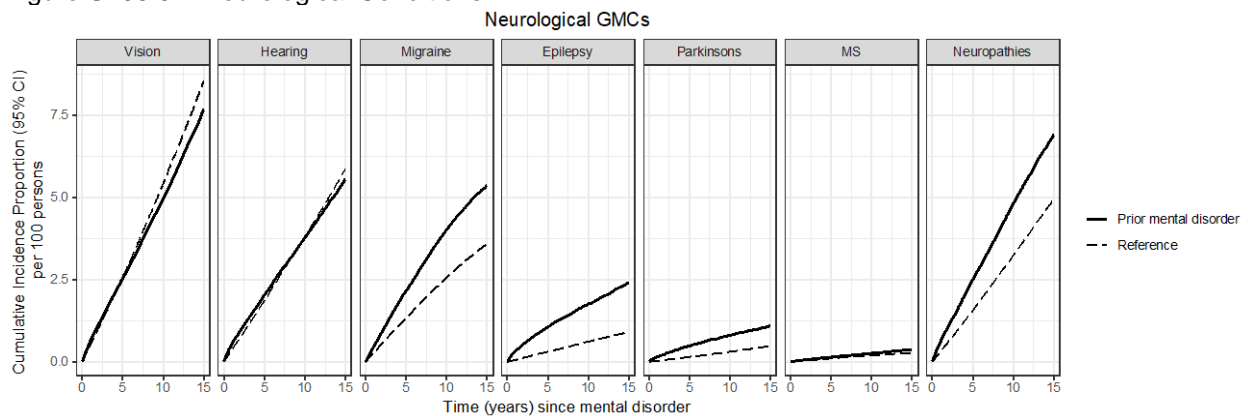

**Figures S107.1-S107.9. Absolute risks of being diagnosed with general medical conditions after a first diagnosis of Neurotic Disorders**

**Figure S107.1 – Circulatory Conditions**

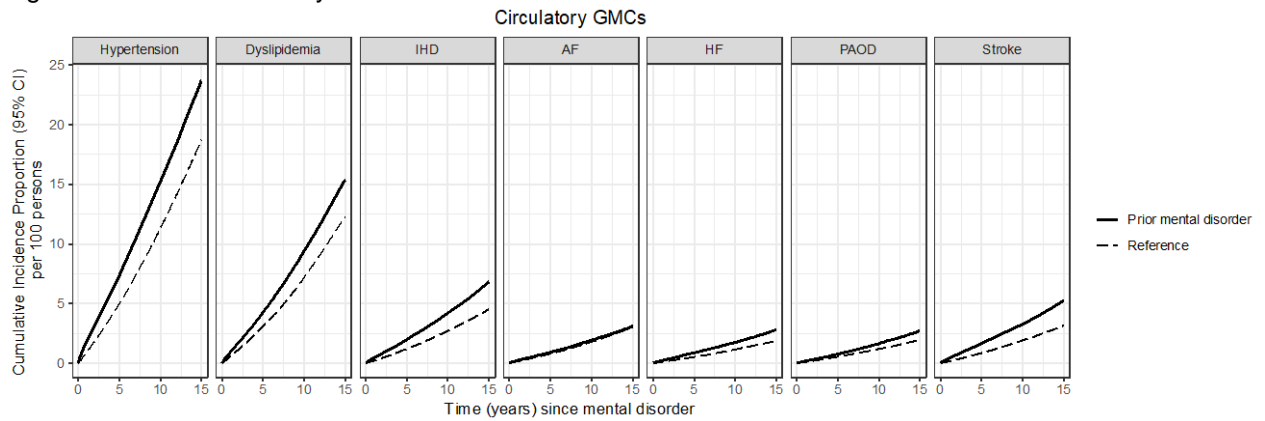

**Figure S107.2 – Endocrine Conditions**

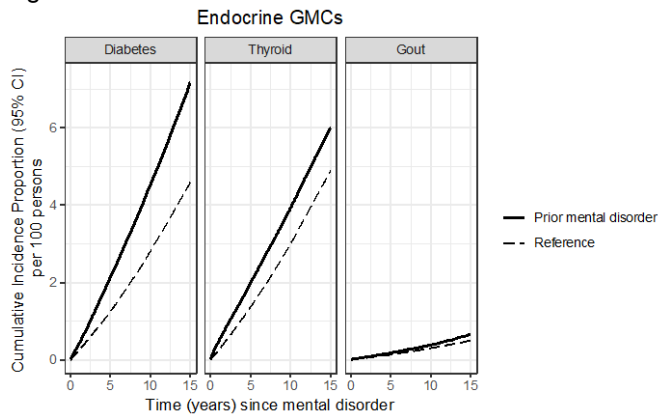

**Figure S107.3 – Pulmonary Conditions**

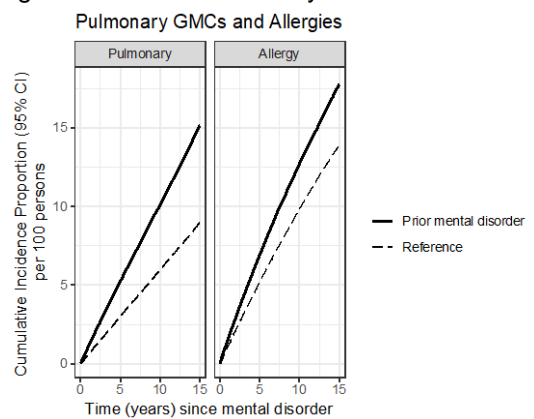

**Figure S107.4 – Gastrointestinal Conditions**

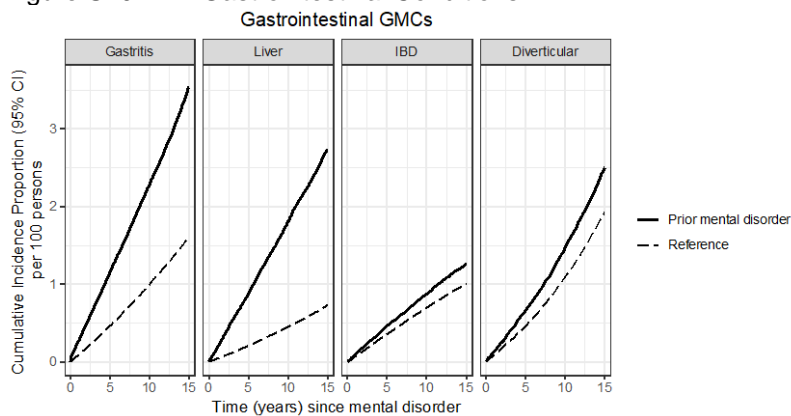



Figure S107.5 – Urogenital Conditions  
Urogenital GMCs

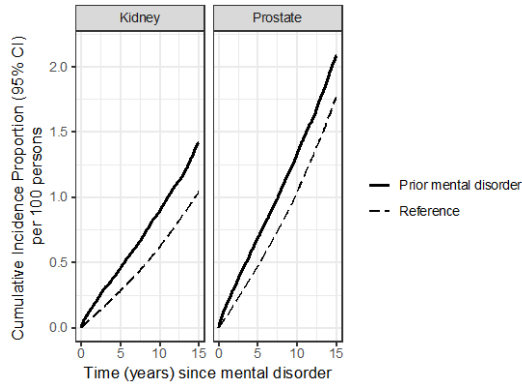

Figure S107.6– Musculoskeletal Conditions  
Musculoskeletal GMCs

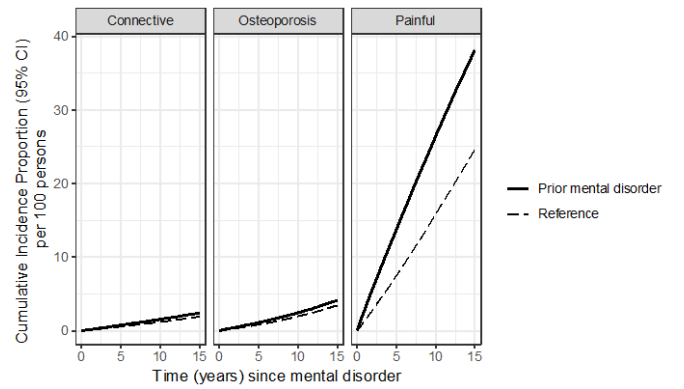

Figure S107.7 – Hematological Conditions  
Hematological GMCs

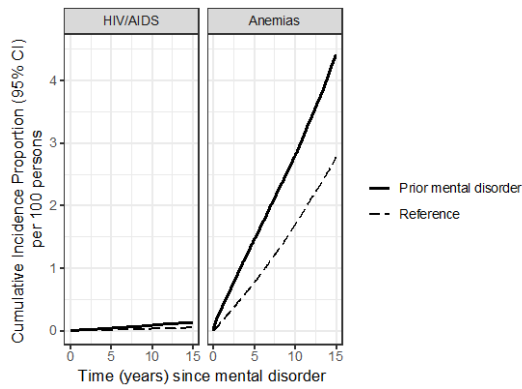

Figure S107.8 – Cancers  
Cancer

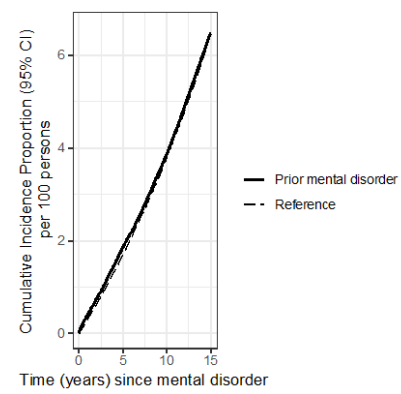

Figure S107.9 – Neurological Conditions  
Neurological GMCs

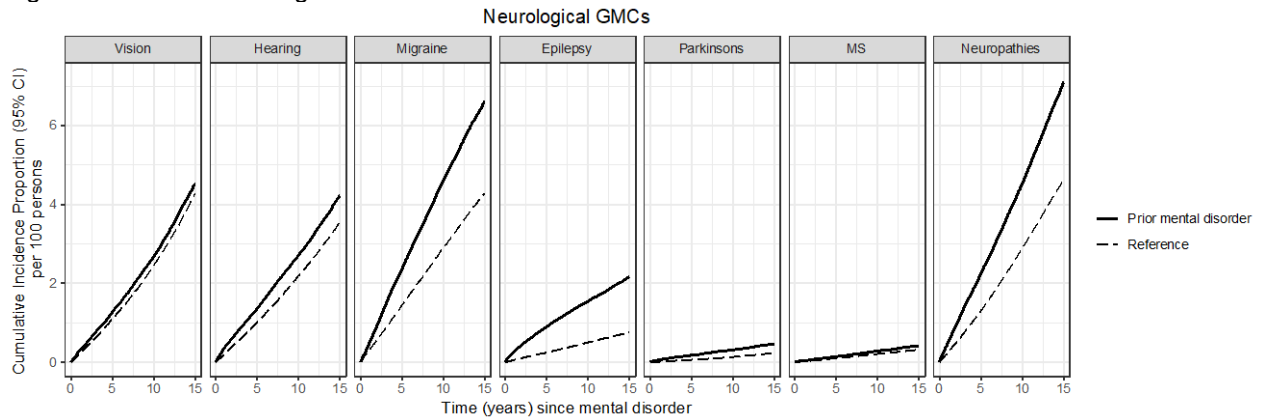

**Figures S108.1-S108.9. Absolute risks of being diagnosed with general medical conditions after a first diagnosis of Eating Disorders**

**Figure S108.1 – Circulatory Conditions**

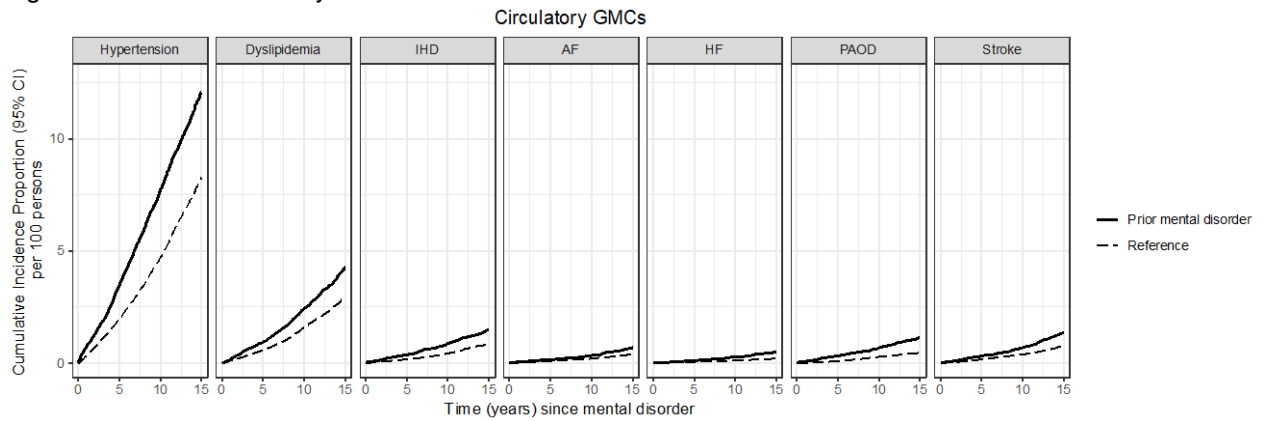

**Figure S108.2 – Endocrine Conditions**

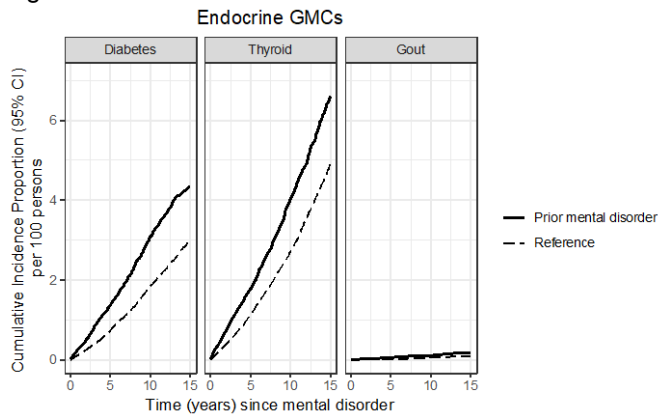

**Figure S108.3 – Pulmonary Conditions**

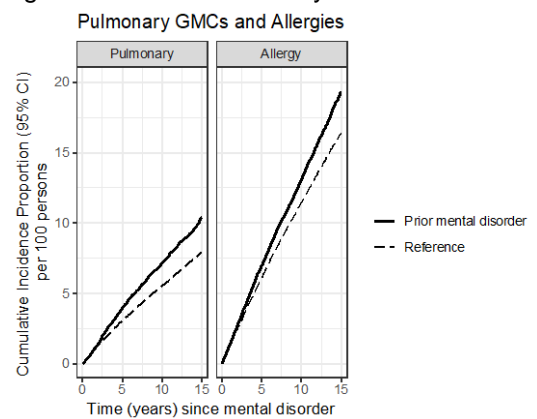

**Figure S108.4 – Gastrointestinal Conditions**

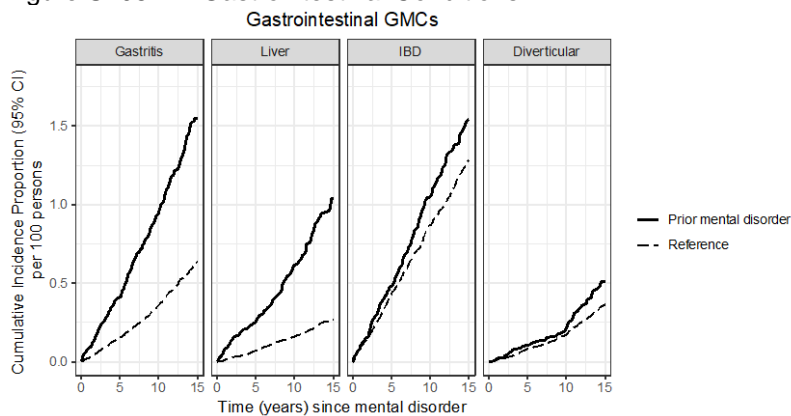

Figure S108.5 – Urogenital Conditions  
Urogenital GMCs

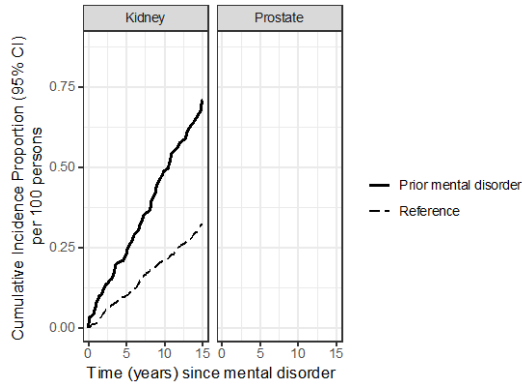

Figure S108.6 – Musculoskeletal Conditions  
Musculoskeletal GMCs

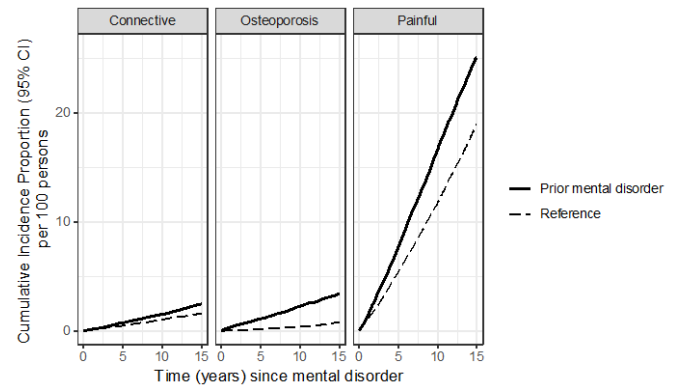

Figure S108.7 – Hematological Conditions  
Hematological GMCs

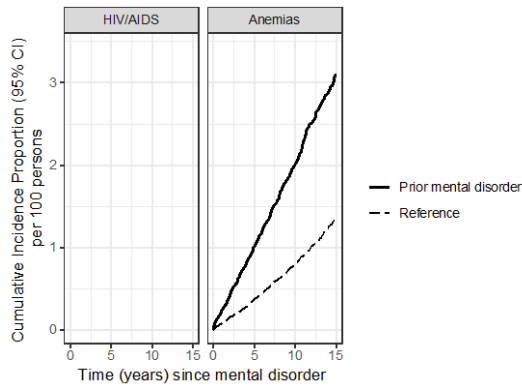

Figure S108.8 – Cancers  
Cancer

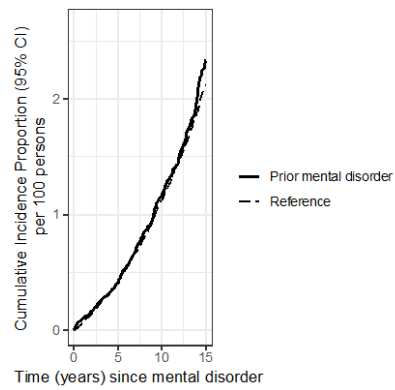

Figure S108.9 – Neurological Conditions

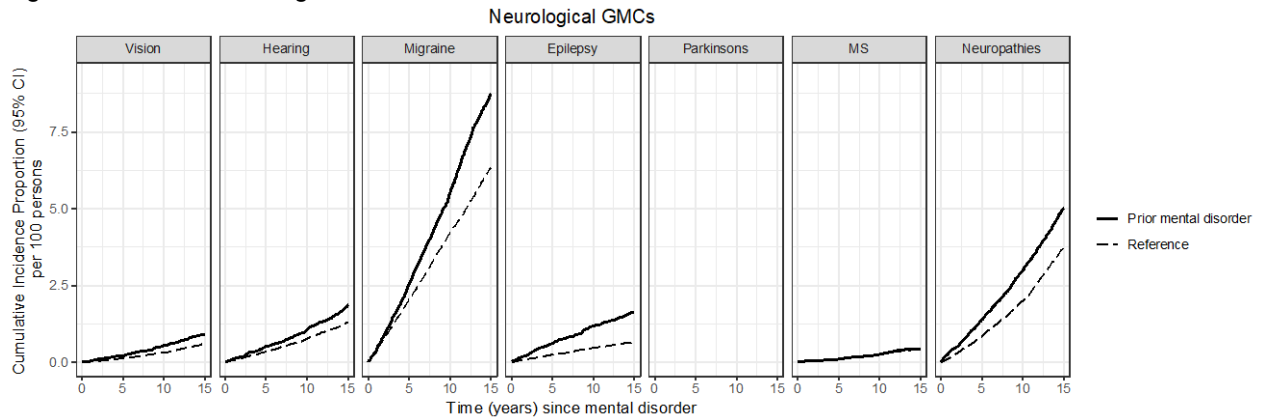

**Figures S109.1-S109.9. Absolute risks of being diagnosed with general medical conditions after a first diagnosis of Personality Disorders**

**Figure S109.1 – Circulatory Conditions**

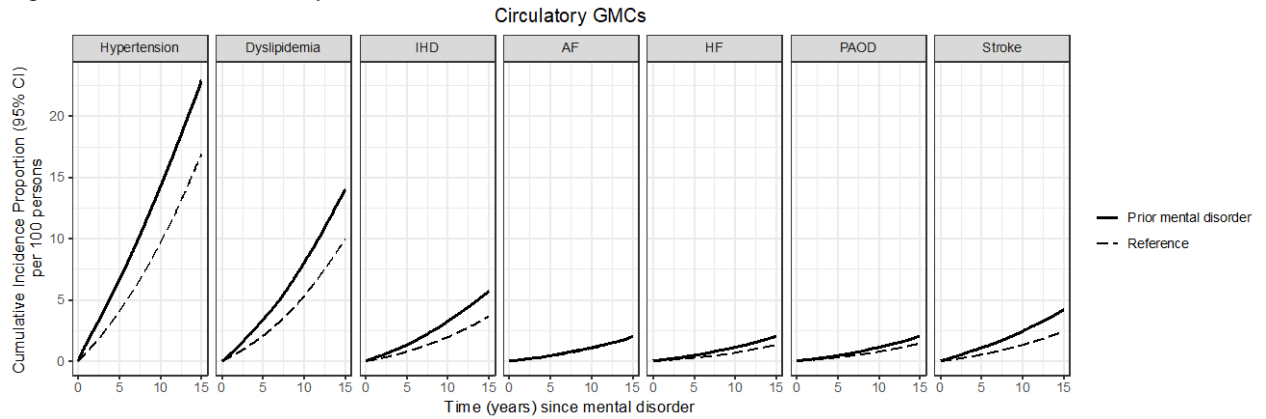

**Figure S109.2 – Endocrine Conditions**

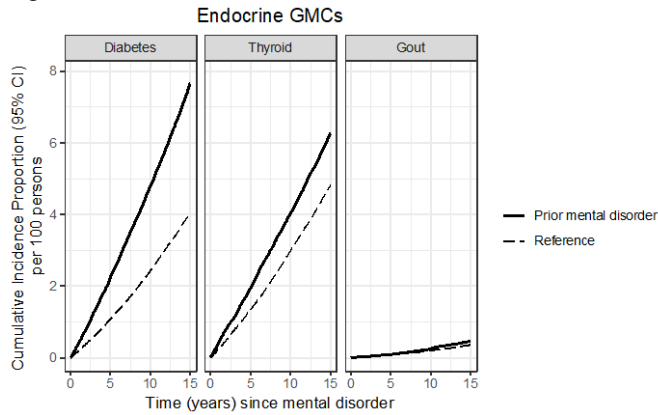

**Figure S109.3 – Pulmonary Conditions**

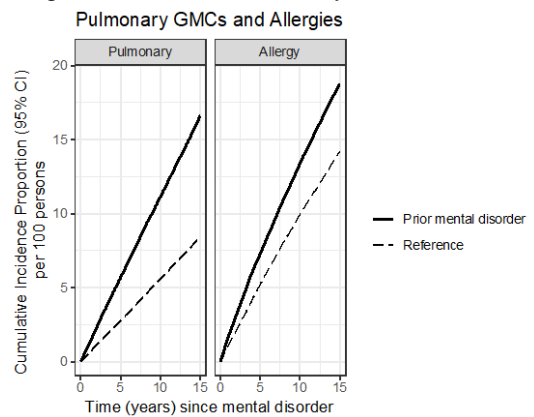

**Figure S109.4 – Gastrointestinal Conditions**

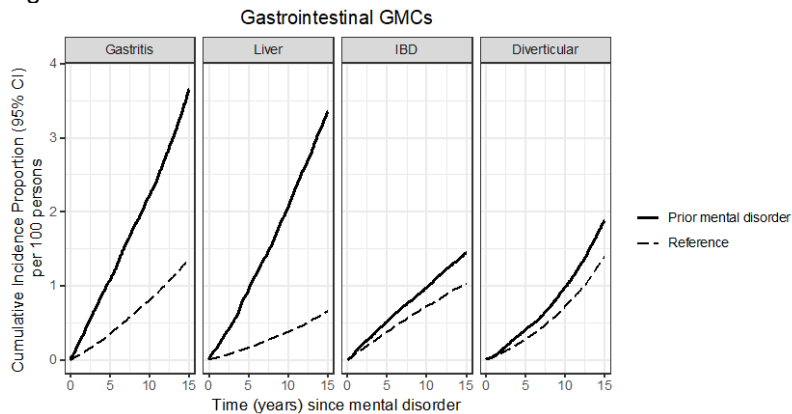

Figure S109.5 – Urogenital Conditions

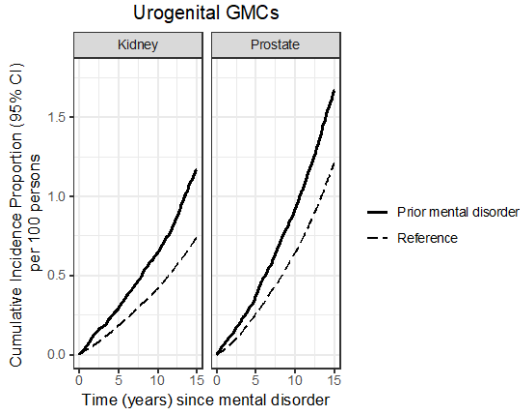

Figure S109.6 – Musculoskeletal Conditions

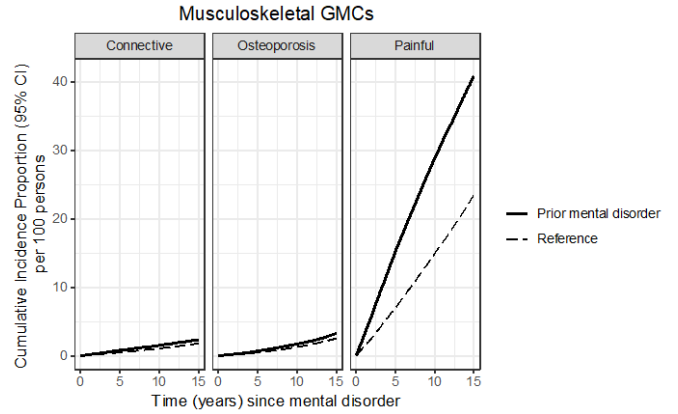

Figure S109.7 – Hematological Conditions

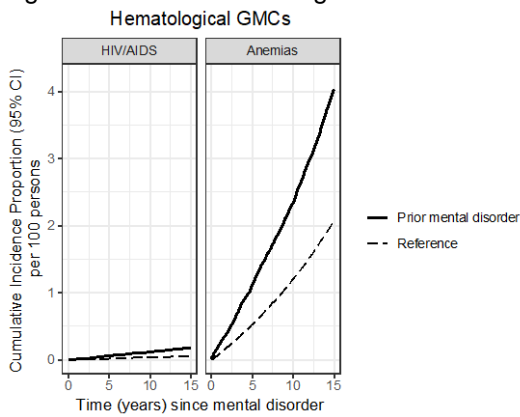

Figure S109.8 – Cancers

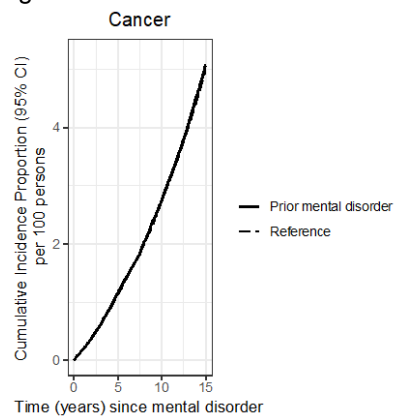

Figure S109.9 – Neurological Conditions

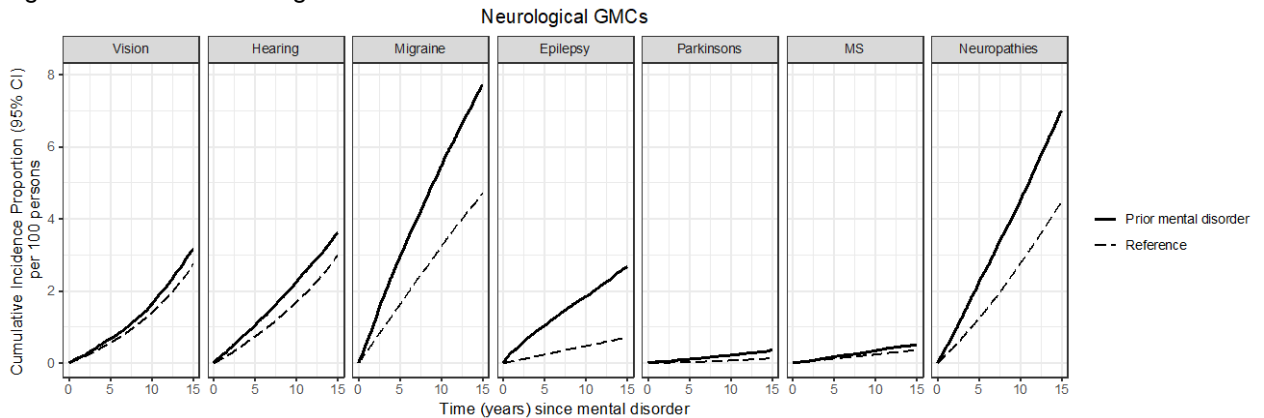

**Figures S110.1-S110.9. Absolute risks of being diagnosed with general medical conditions after a first diagnosis of Intellectual Disabilities**

**Figure S110.1 – Circulatory Conditions**

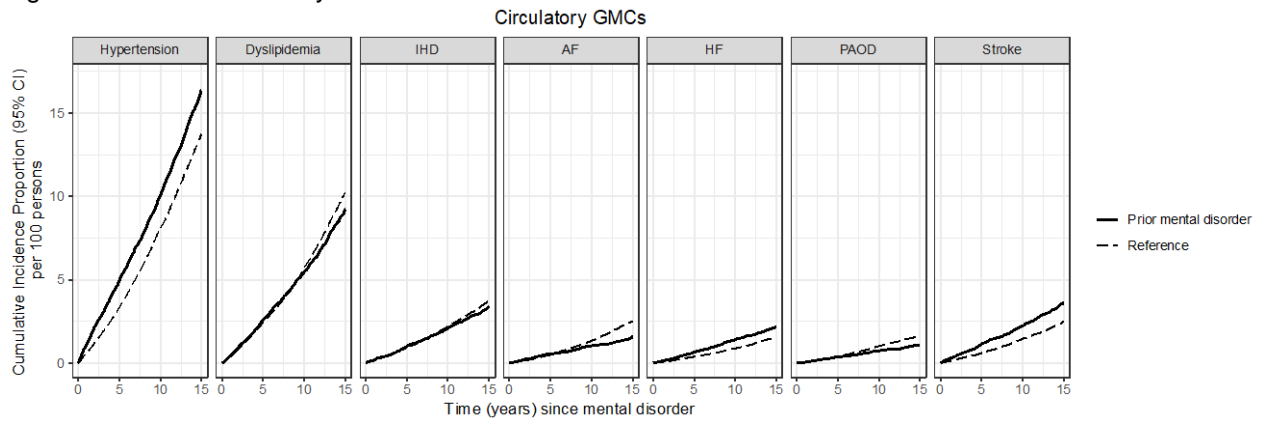

**Figure S110.2 – Endocrine Conditions**

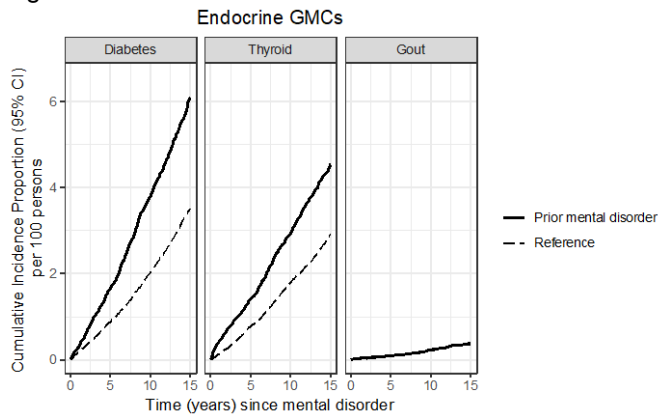

**Figure S110.3 – Pulmonary Conditions**

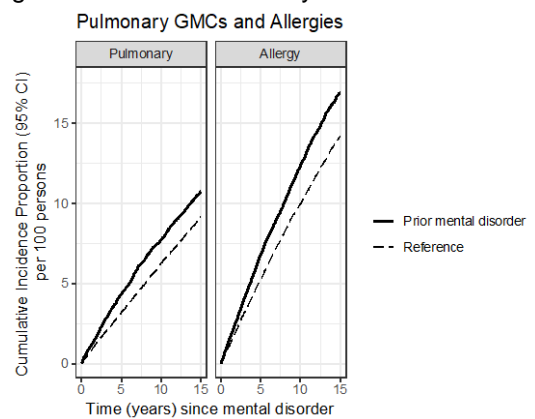

**Figure S110.4 – Gastrointestinal Conditions**

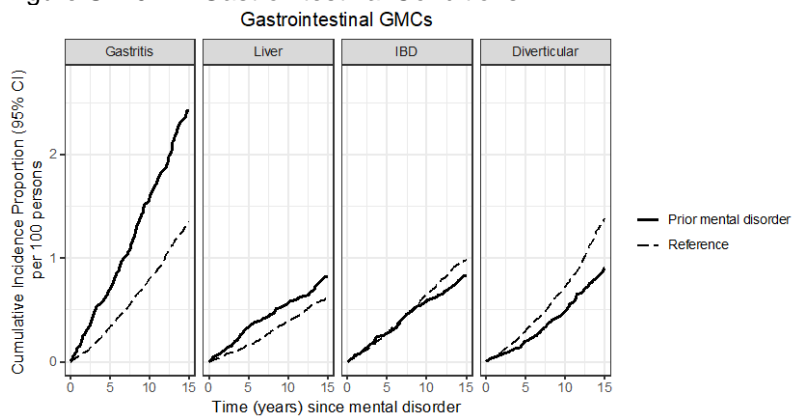

Figure S110.5 – Urogenital Conditions  
Urogenital GMCs

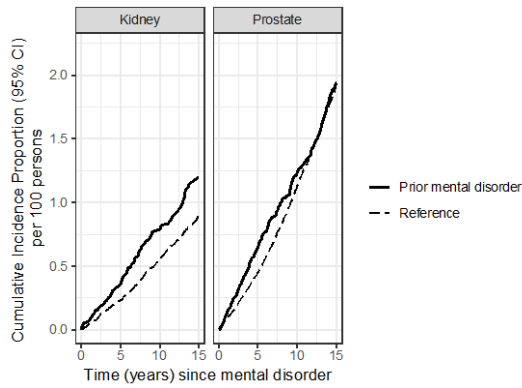

Figure S110.6 – Musculoskeletal Conditions  
Musculoskeletal GMCs

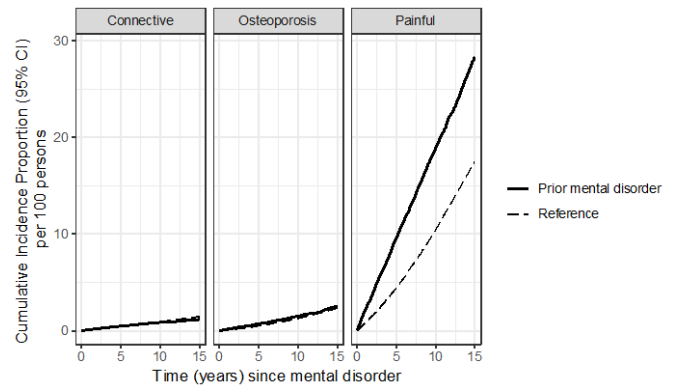

Figure S110.7 – Hematological Conditions  
Hematological GMCs

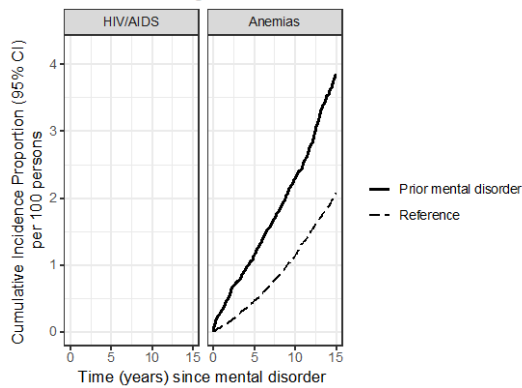

Figure S110.8 – Cancers  
Cancer

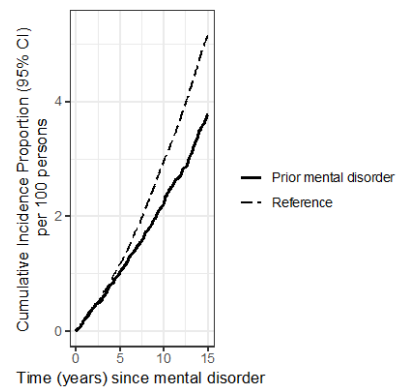

Figure S110.9 – Neurological Conditions  
Neurological GMCs

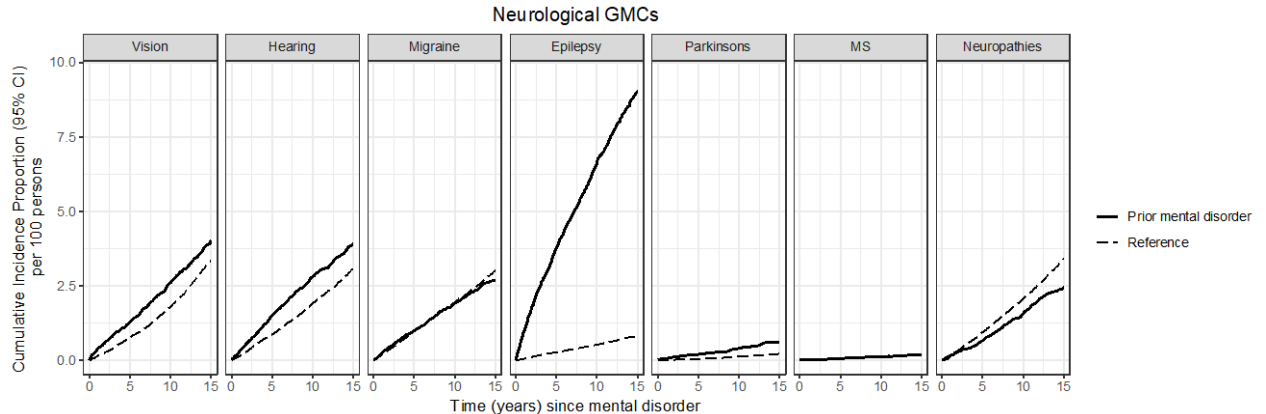

**Figures S111.1-S111.9. Absolute risks of being diagnosed with general medical conditions after a first diagnosis of Developmental Disorders**

**Figure S111.1 – Circulatory Conditions**

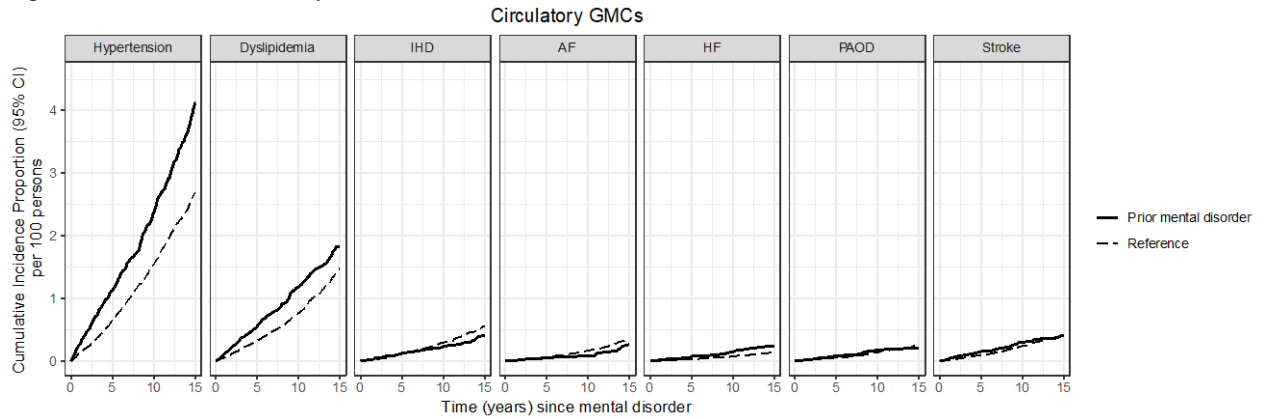

**Figure S111.2 – Endocrine Conditions**

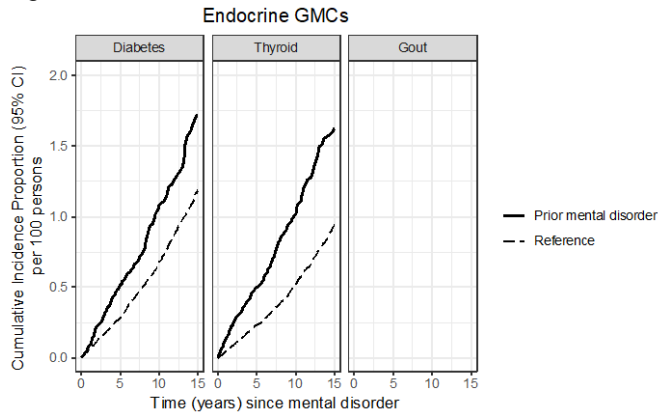

**Figure S111.3 – Pulmonary Conditions**

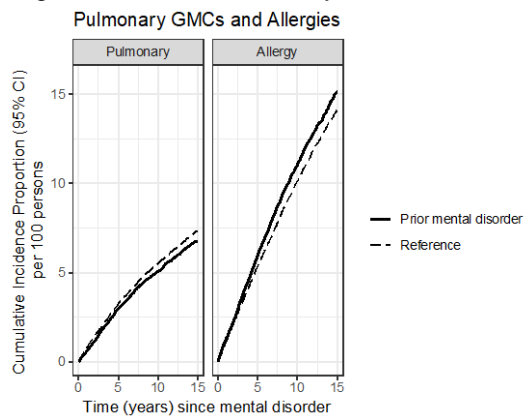

**Figure S111.4 – Gastrointestinal Conditions**

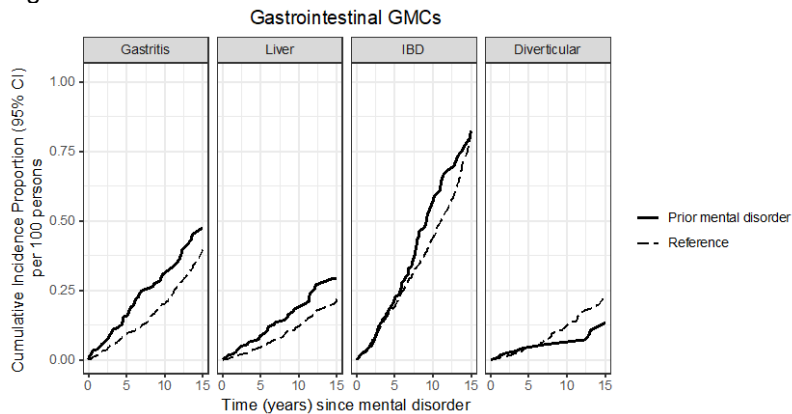



Figure S111.5 – Urogenital Conditions  
Urogenital GMCs

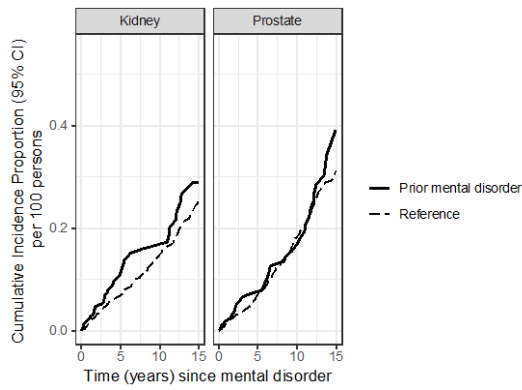

Figure S111.6 – Musculoskeletal Conditions  
Musculoskeletal GMCs

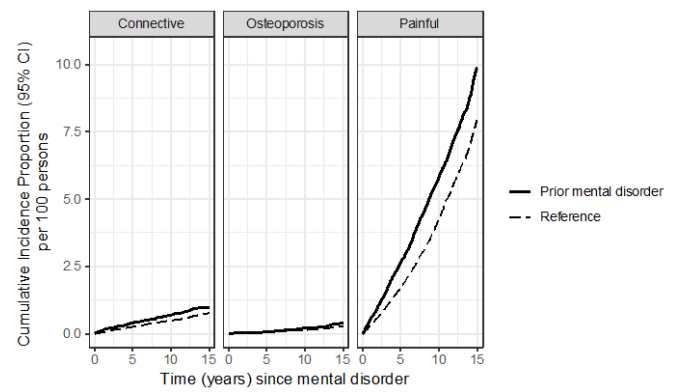

Figure S111.7 – Hematological Conditions  
Hematological GMCs

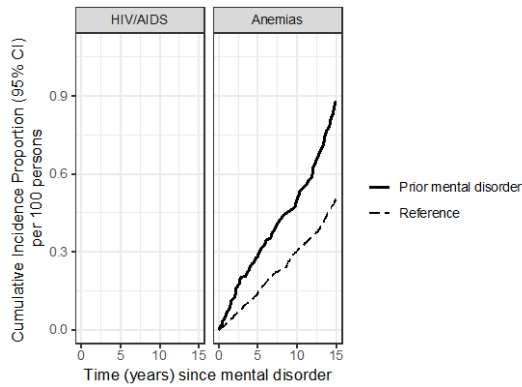

Figure S111.8 – Cancers  
Cancer

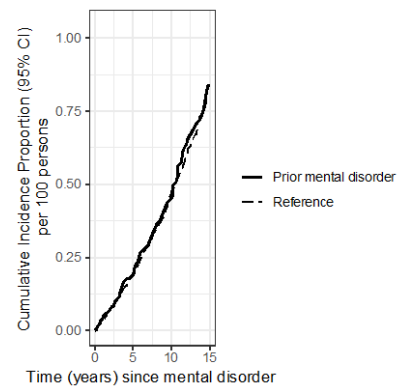

Figure S111.9 – Neurological Conditions  
Neurological GMCs

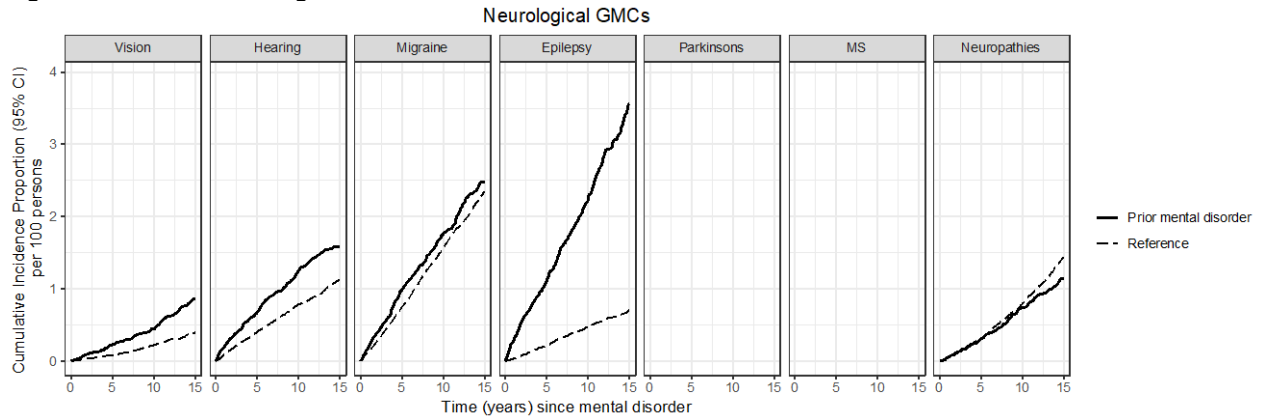

**Figures S112.1-S112.9. Absolute risks of being diagnosed with general medical conditions after a first diagnosis of Behavioral Disorders**

Figure S112.1 – Circulatory Conditions

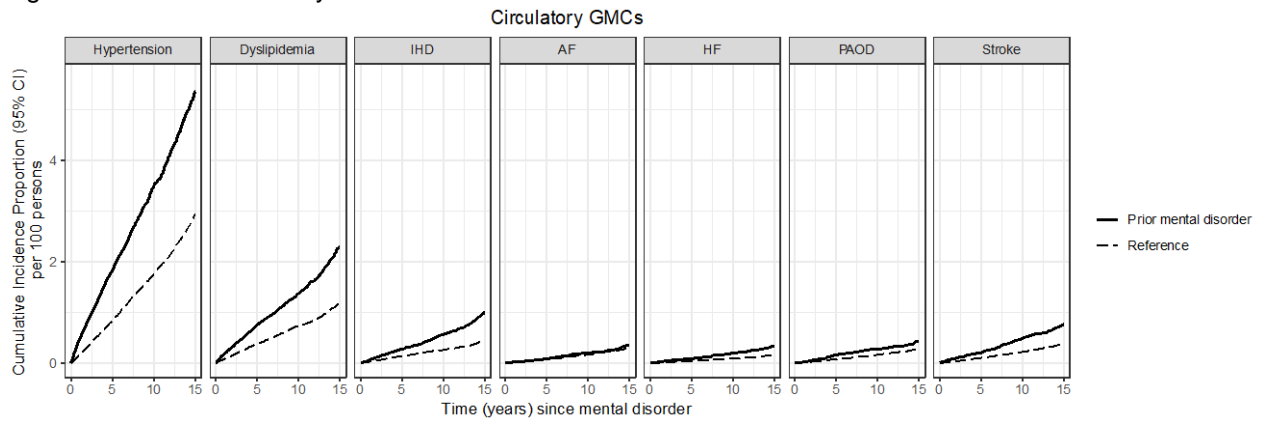

Figure S112.2 – Endocrine Conditions

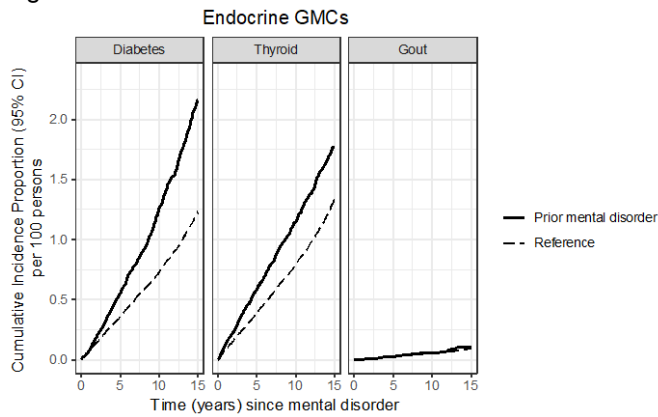

Figure S112.3 – Pulmonary Conditions

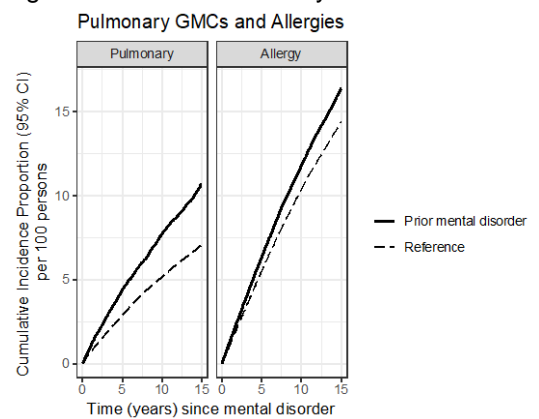

Figure S112.4 – Gastrointestinal Conditions

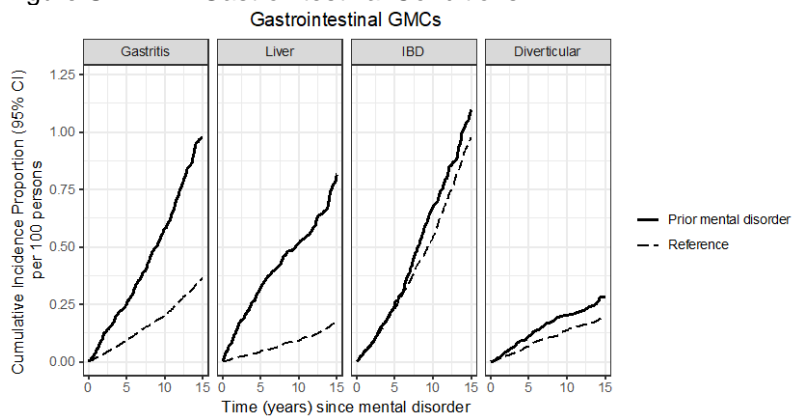

Figure S112.5 – Urogenital Conditions  
Urogenital GMCs

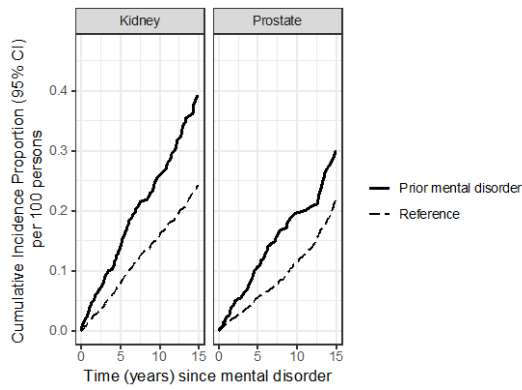

Figure S112.6 – Musculoskeletal Conditions  
Musculoskeletal GMCs

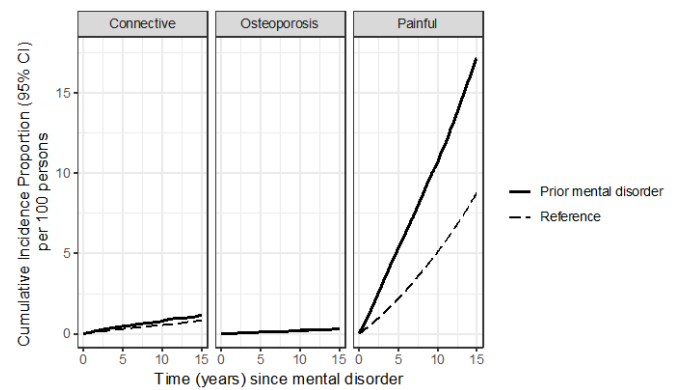

Figure S112.7 – Hematological Conditions  
Hematological GMCs

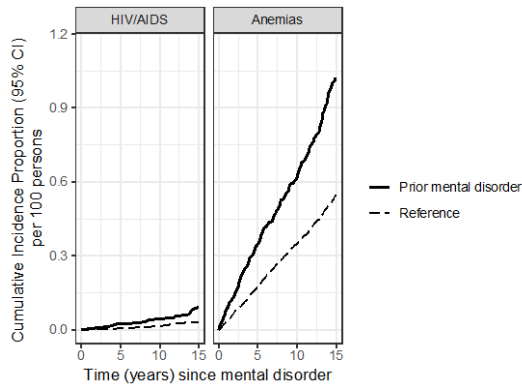

Figure S112.8 – Cancers  
Cancer

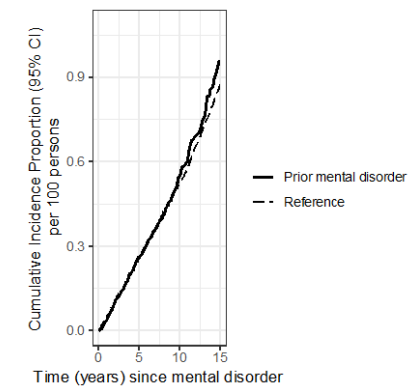

Figure S112.9 – Neurological Conditions  
Neurological GMCs

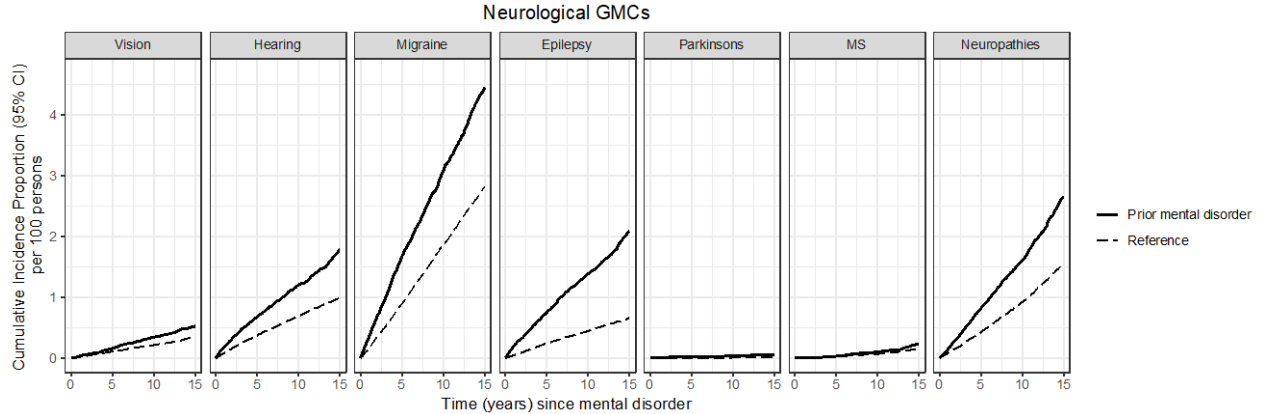

**Figures S113.1-S113.9. Sex-specific absolute risks of being diagnosed with general medical conditions after a first diagnosis of Organic Disorders**

Figure S113.1 – Circulatory Conditions

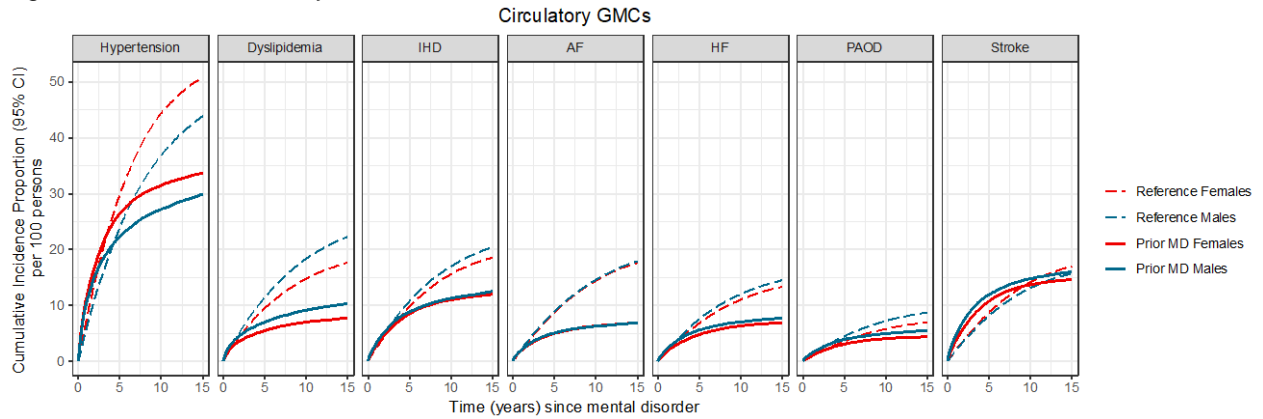

Figure S113.2 – Endocrine Conditions

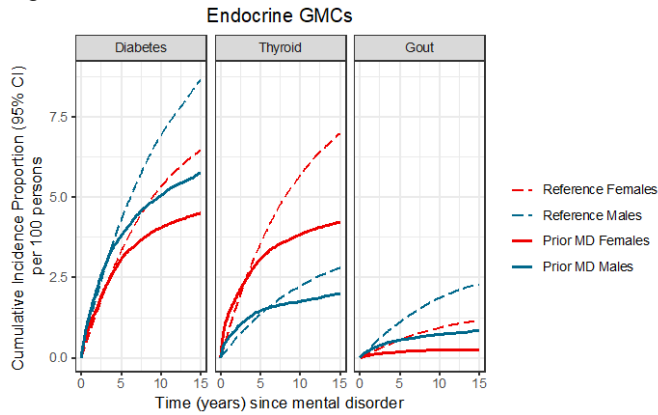

Figure S113.3 – Pulmonary Conditions

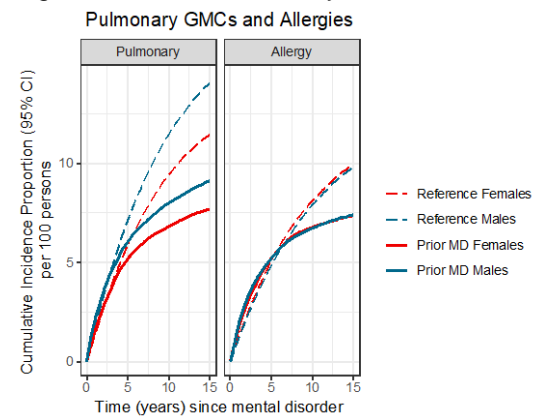

Figure S113.4 – Gastrointestinal Conditions

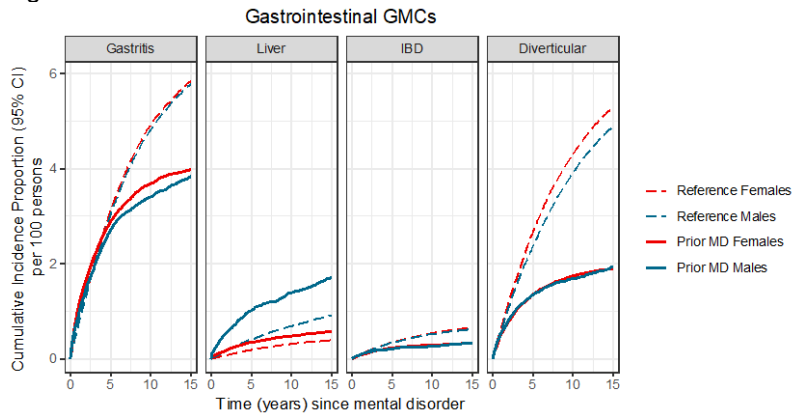

Figure S113.5 – Urogenital Conditions

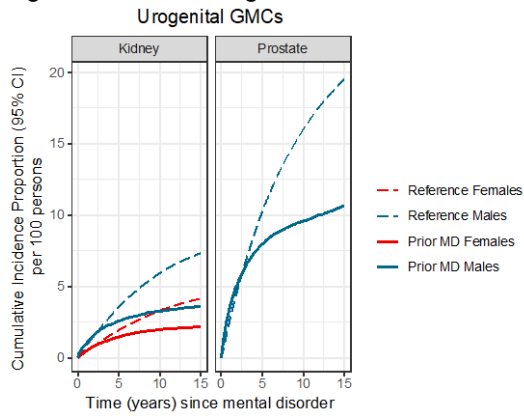

Figure S113.6 – Musculoskeletal Conditions

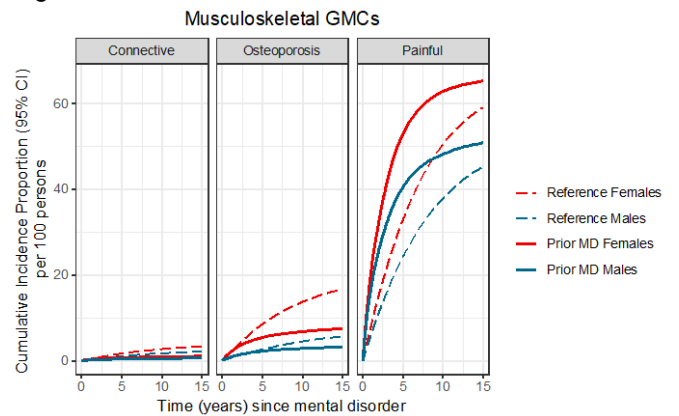

Figure S113.7 – Hematological Conditions

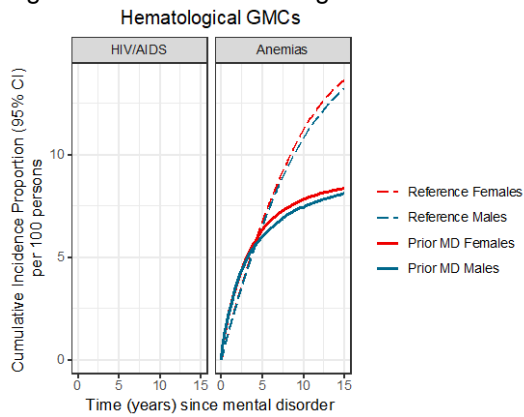

Figure S113.8 – Cancers

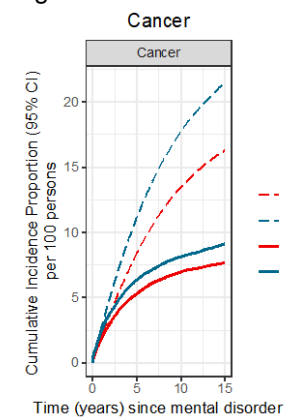

Figure S113.9 – Neurological Conditions

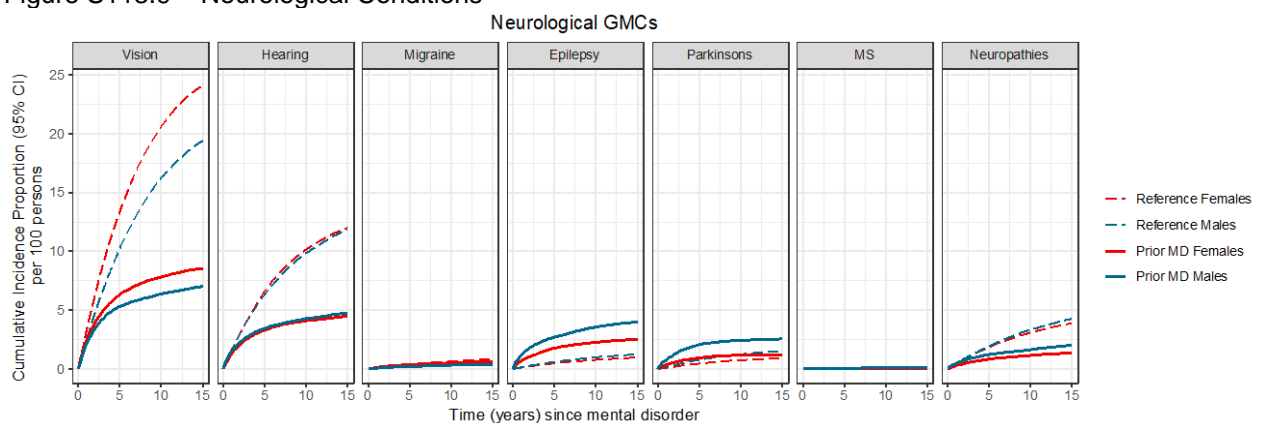

**Figures S104.1-S104.9. Sex-specific absolute risks of being diagnosed with general medical conditions after a first diagnosis of Substance Use Disorders**

Figure S114.1 – Circulatory Conditions

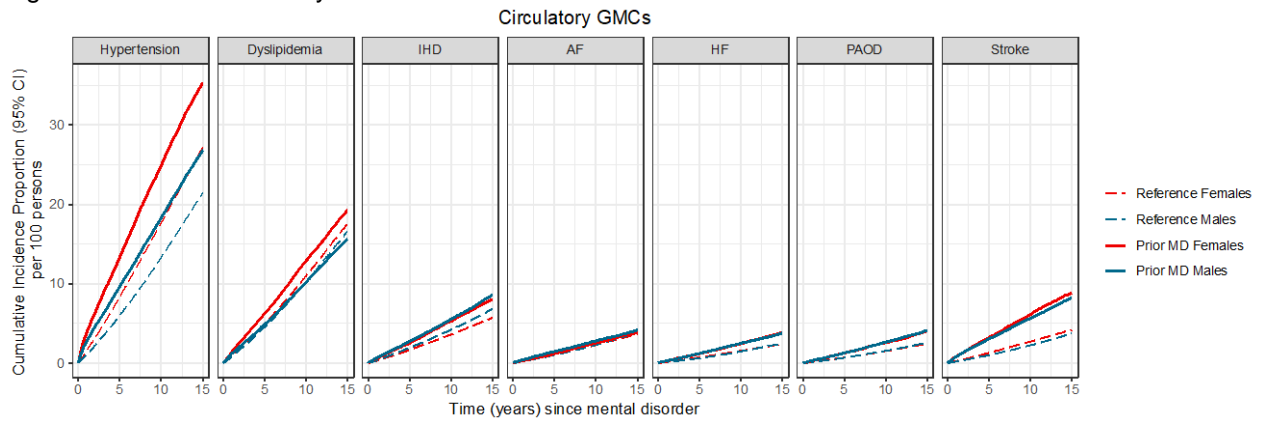

Figure S114.2 – Endocrine Conditions

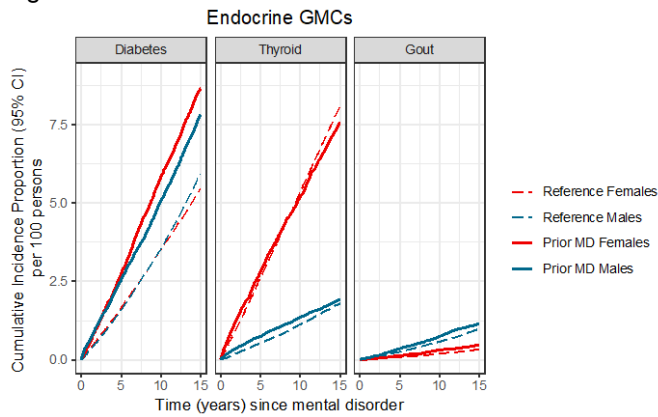

Figure S114.3 – Pulmonary Conditions

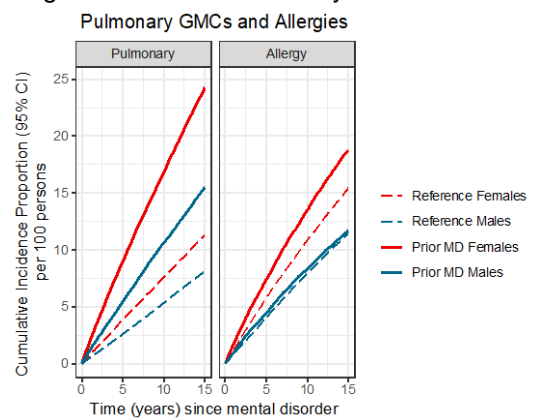

Figure S114.4 – Gastrointestinal Conditions

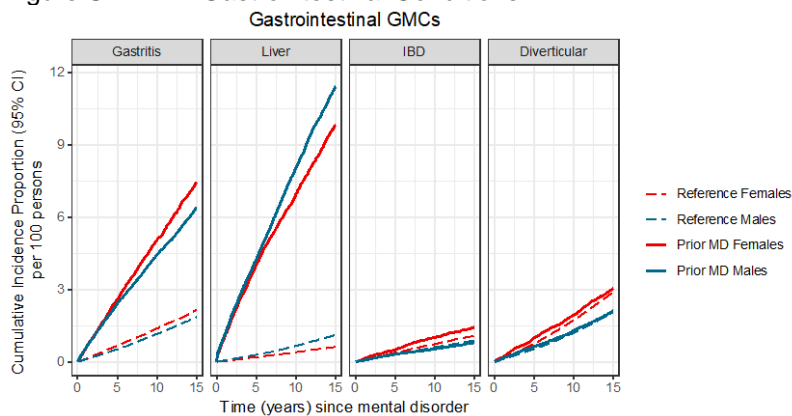

Figure S114.5 – Urogenital Conditions  
Urogenital GMCs

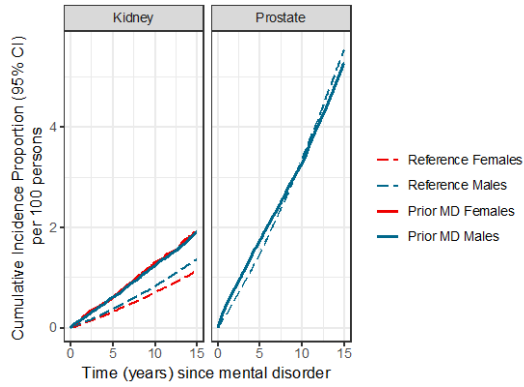

Figure S114.6 – Musculoskeletal Conditions  
Musculoskeletal GMCs

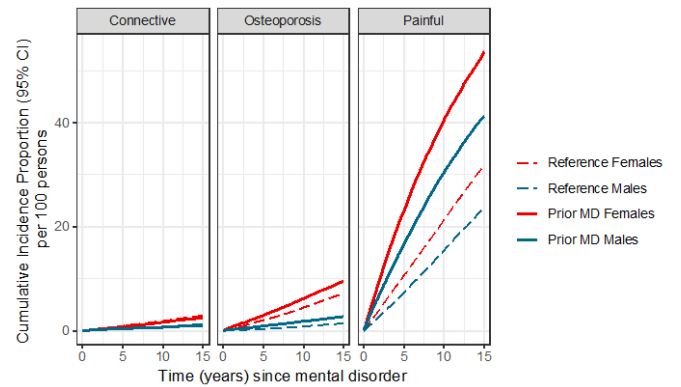

Figure S114.7 – Hematological Conditions  
Hematological GMCs

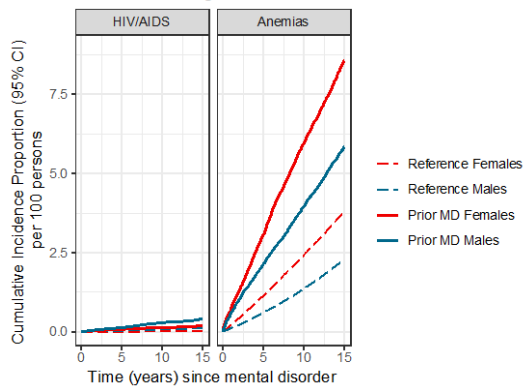

Figure S114.8 – Cancers  
Cancer

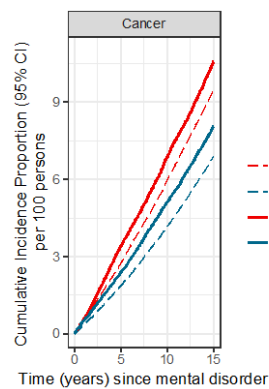

Figure S114.9 – Neurological Conditions

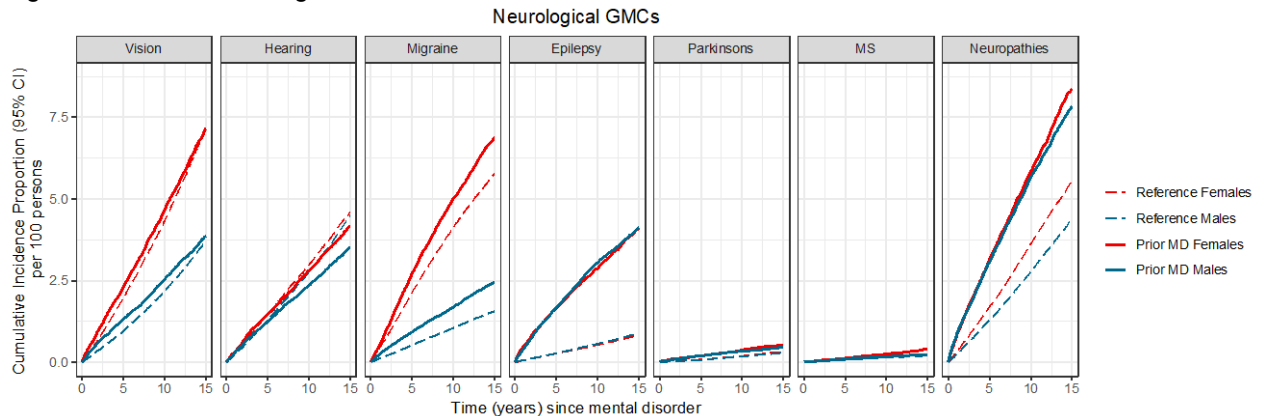

**Figures S115.1-S115.9. Sex-specific absolute risks of being diagnosed with general medical conditions after a first diagnosis of Schizophrenia**

Figure S115.1 – Circulatory Conditions

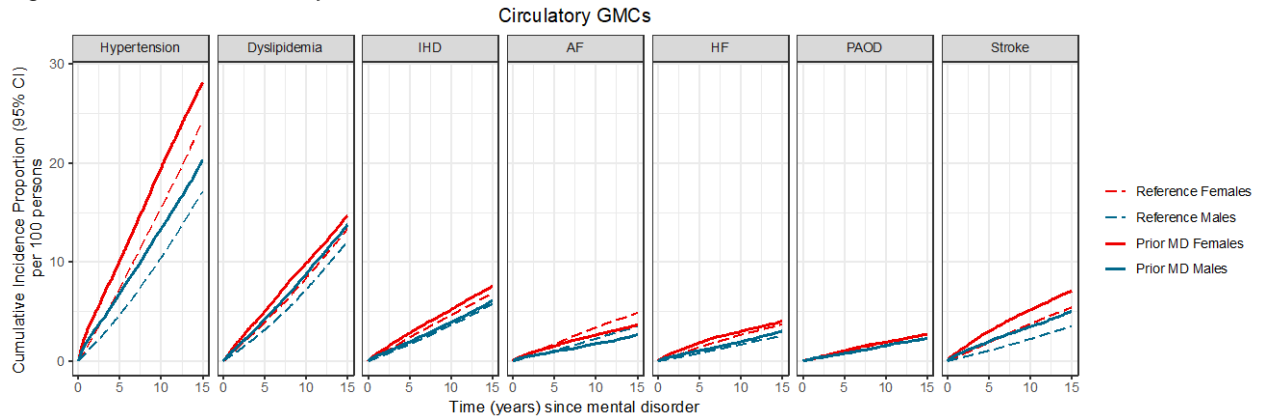

Figure S115.2 – Endocrine Conditions

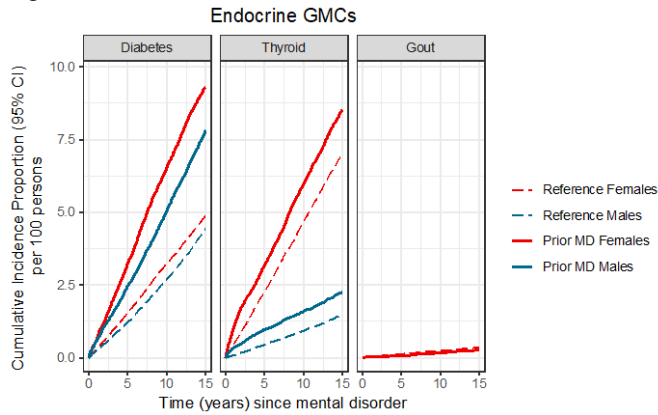

Figure S115.3 – Pulmonary Conditions

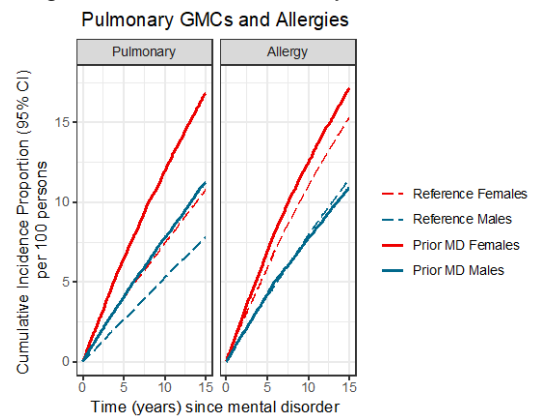

Figure S115.4 – Gastrointestinal Conditions

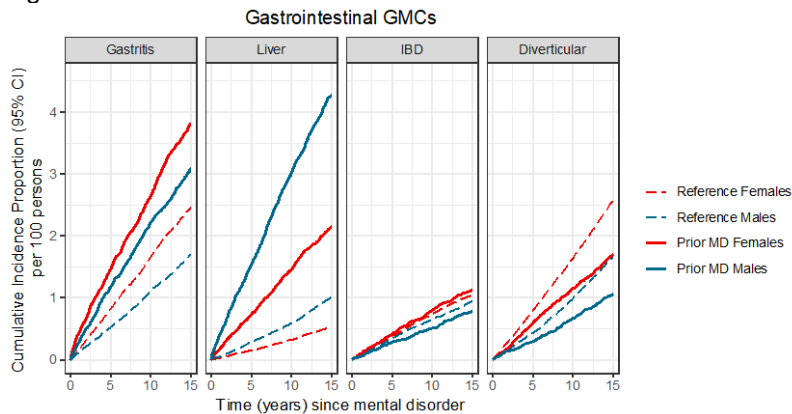



Figure S115.5 – Urogenital Conditions  
Urogenital GMCs

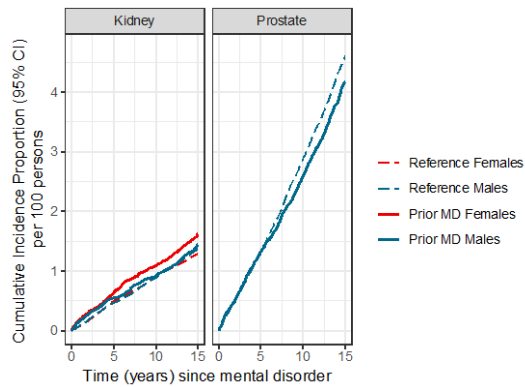

Figure S115.6 – Musculoskeletal Conditions  
Musculoskeletal GMCs

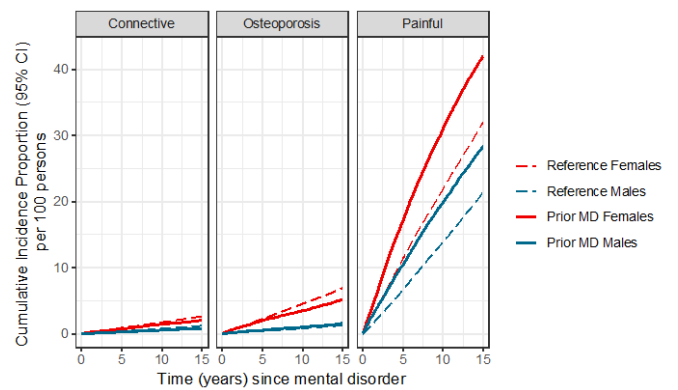

Figure S115.7 – Hematological Conditions  
Hematological GMCs

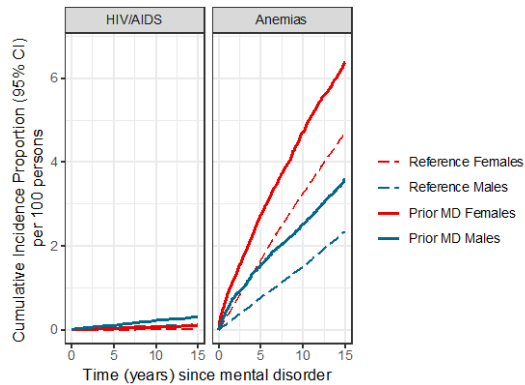

Figure S115.8 – Cancers  
Cancer

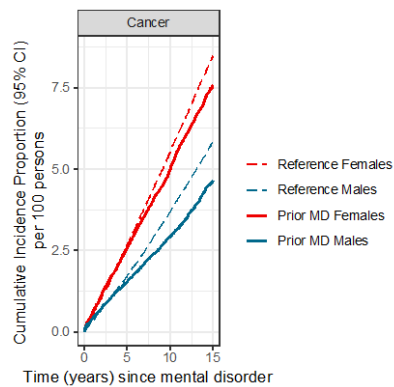

Figure S115.9 – Neurological Conditions  
Neurological GMCs

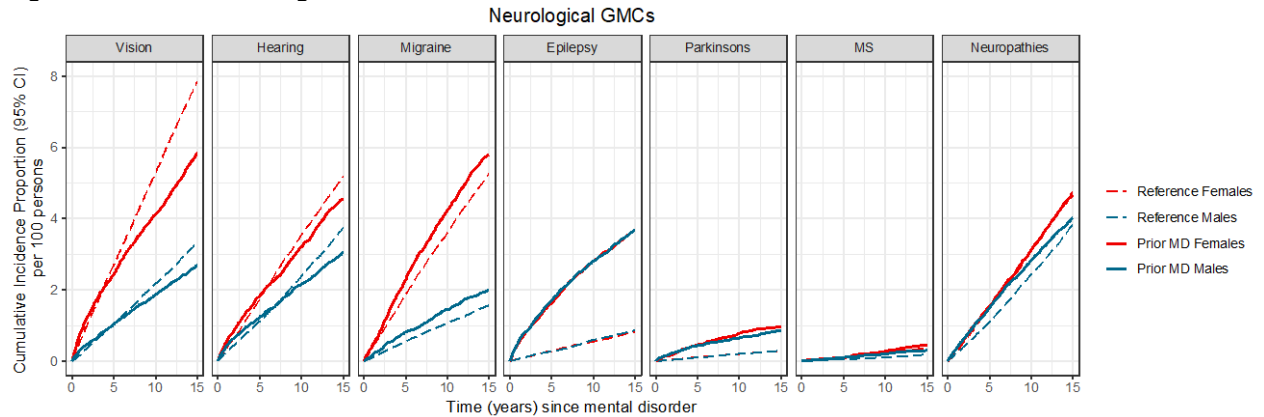

**Figures S116.1-S116.9. Sex-specific absolute risks of being diagnosed with general medical conditions after a first diagnosis of Mood Disorders**

Figure S116.1 – Circulatory Conditions

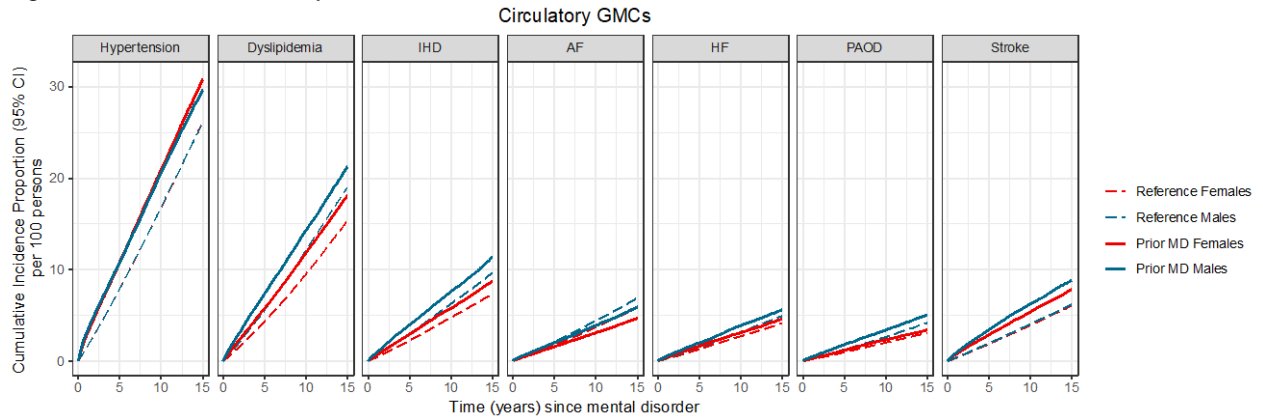

Figure S116.2 – Endocrine Conditions

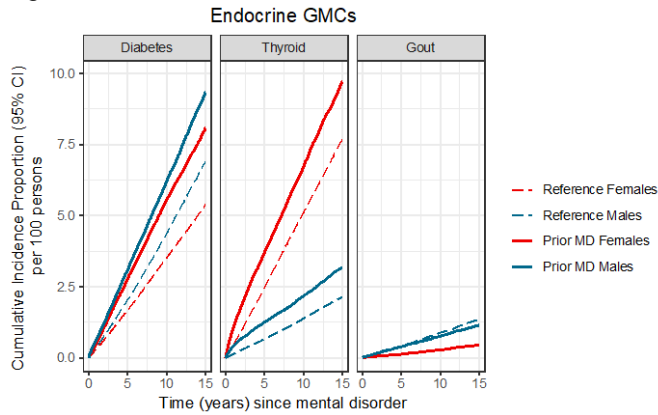

Figure S116.3 – Pulmonary Conditions

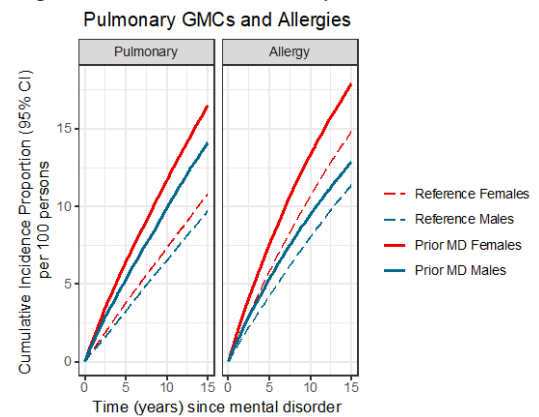

Figure S116.4 – Gastrointestinal Conditions

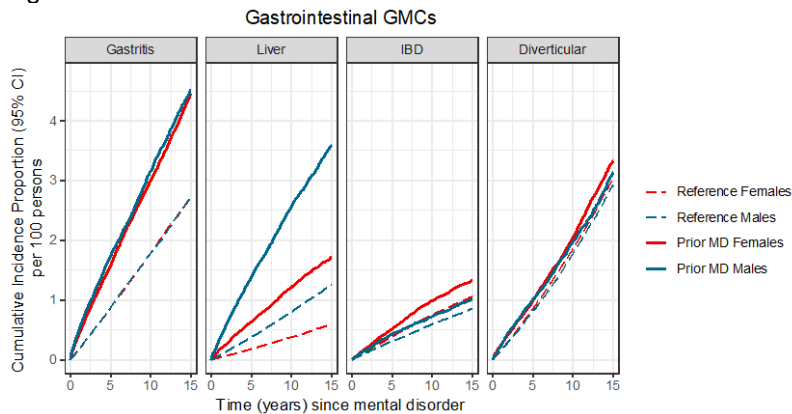

Figure S116.5 – Urogenital Conditions

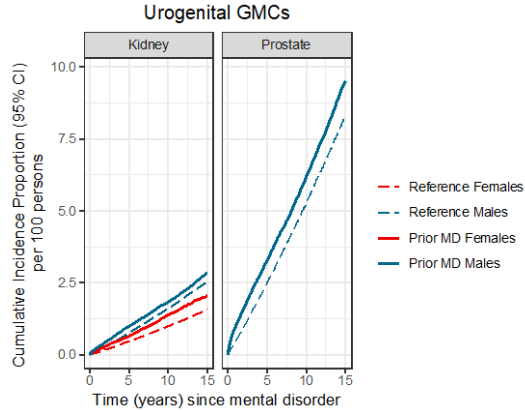

Figure S116.6 – Musculoskeletal Conditions

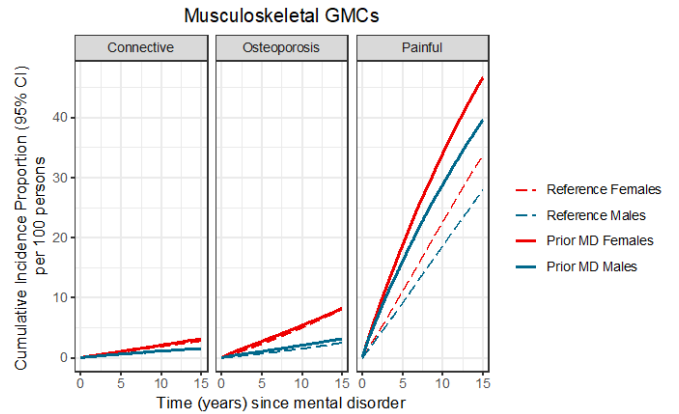

Figure S116.7 – Hematological Conditions

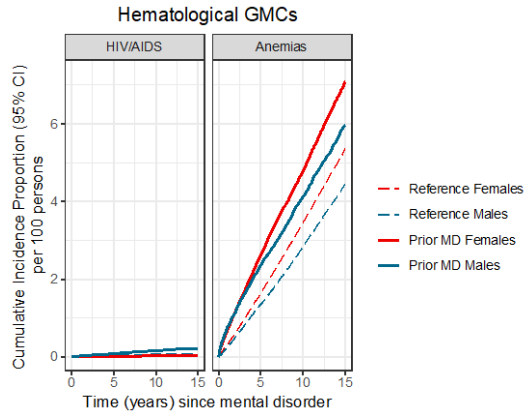

Figure S116.8 – Cancers

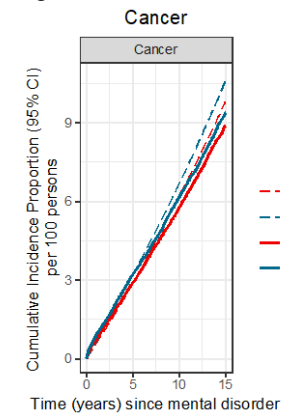

Figure S116.9 – Neurological Conditions

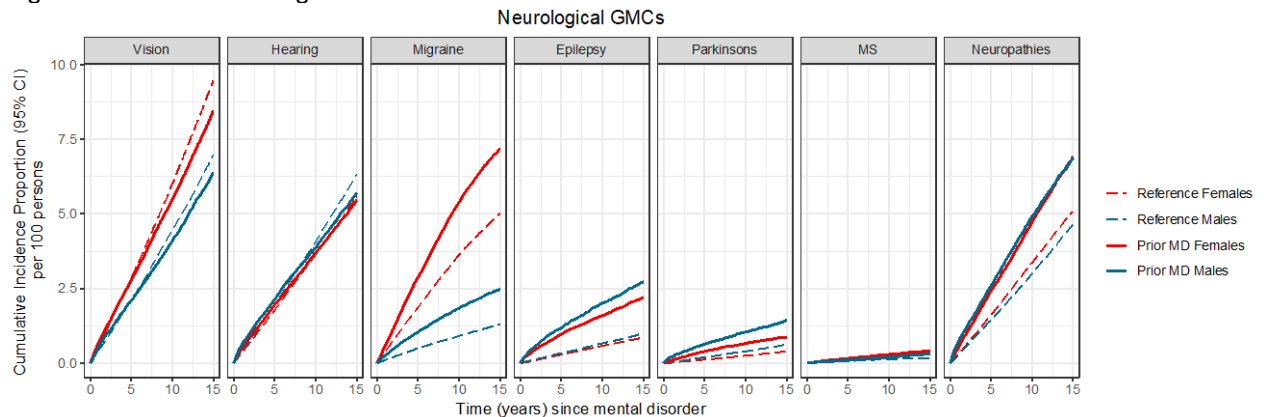

**Figures S117.1-S117.9. Sex-specific absolute risks of being diagnosed with general medical conditions after a first diagnosis of Neurotic Disorders**

Figure S117.1 – Circulatory Conditions

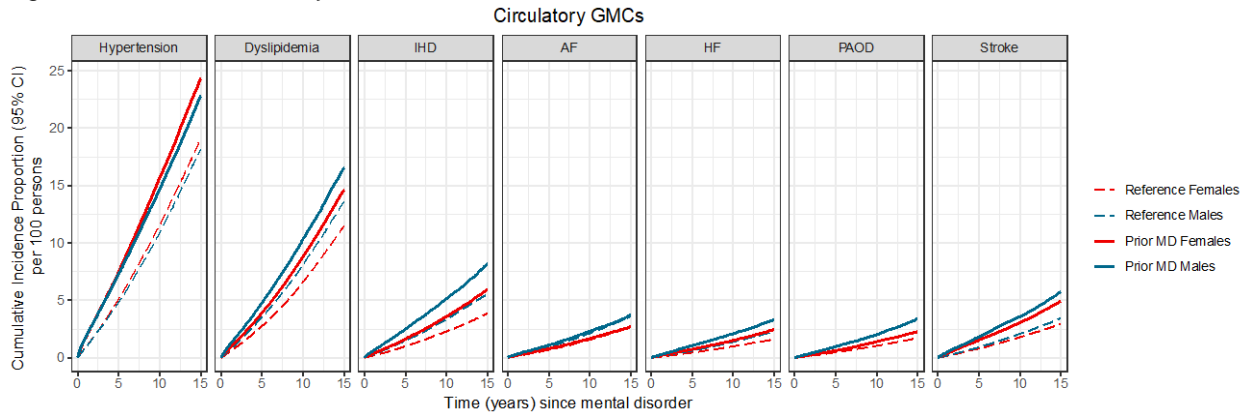

Figure S117.2 – Endocrine Conditions

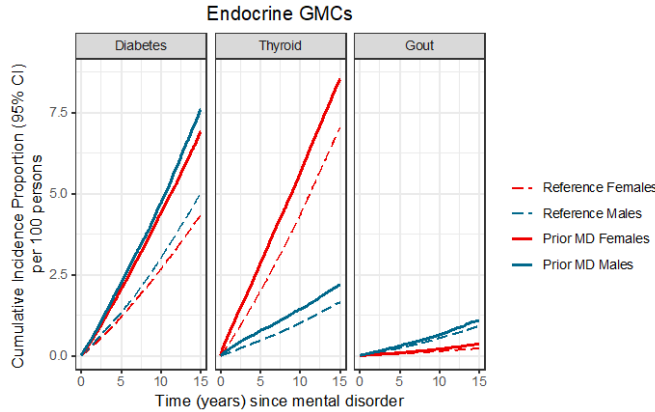

Figure S117.3 – Pulmonary Conditions

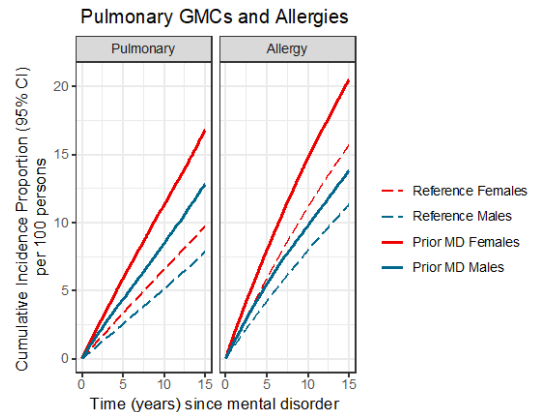

Figure S117.4 – Gastrointestinal Conditions

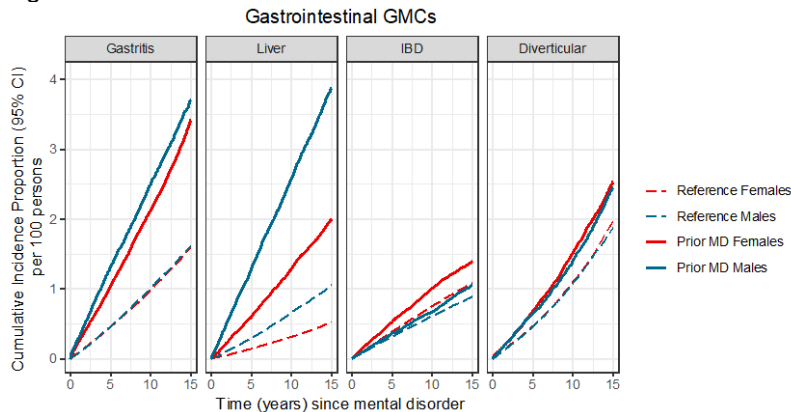

Figure S117.5 – Urogenital Conditions      Figure S117.6 – Musculoskeletal Conditions

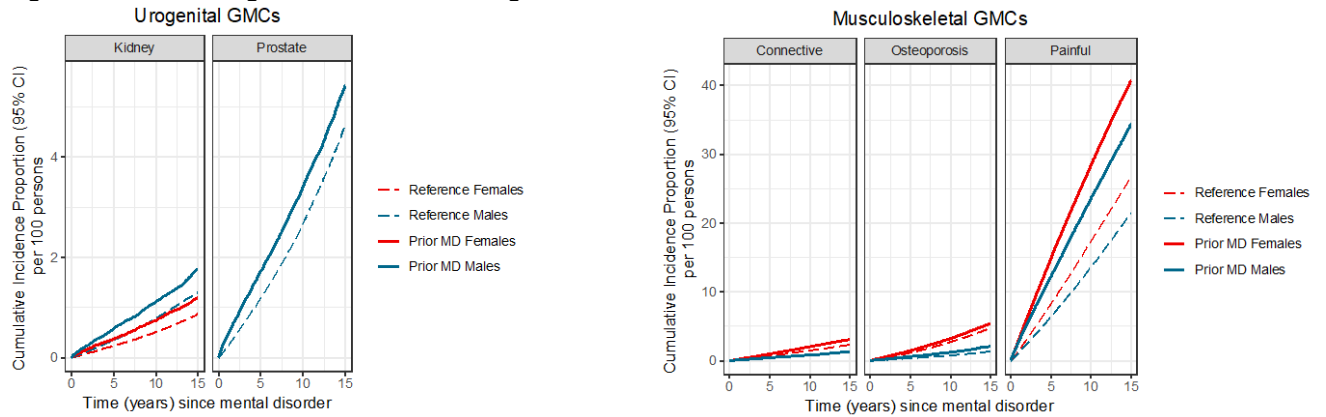

Figure S117.7 – Hematological Conditions

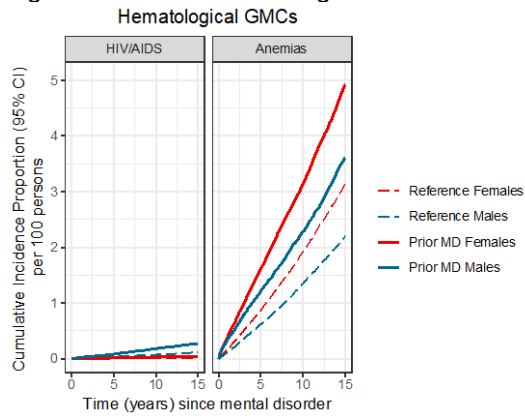

Figure S117.8 – Cancers

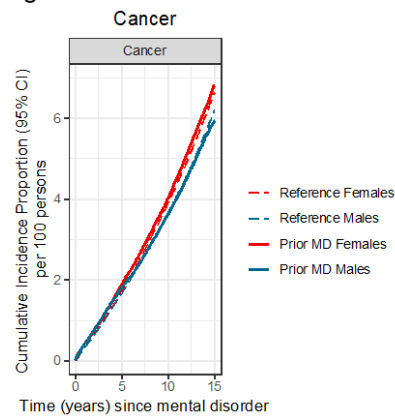

Figure S117.9 – Neurological Conditions

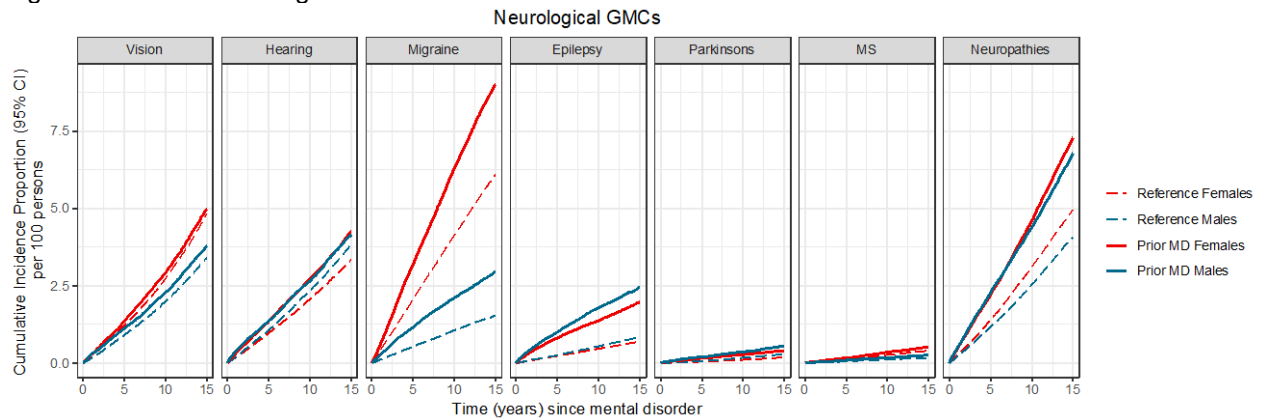

**Figures S118.1-S118.9. Sex-specific absolute risks of being diagnosed with general medical conditions after a first diagnosis of Eating Disorders**

Figure S118.1 – Circulatory Conditions

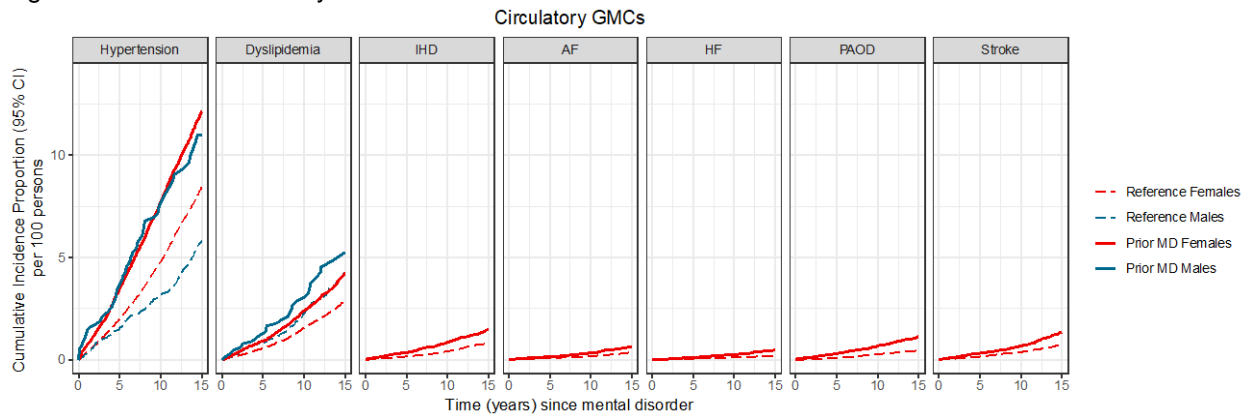

Figure S118.2 – Endocrine Conditions

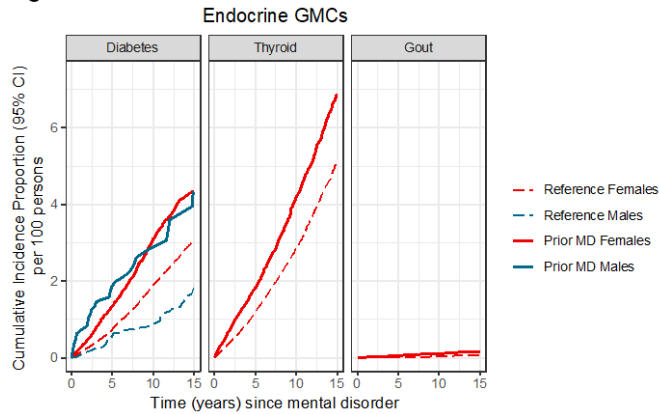

Figure S118.3 – Pulmonary Conditions

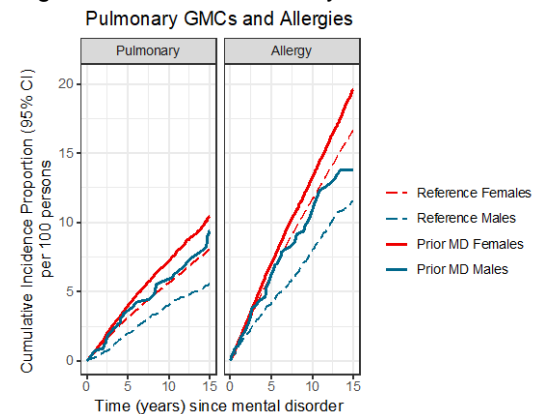

Figure S118.4 – Gastrointestinal Conditions

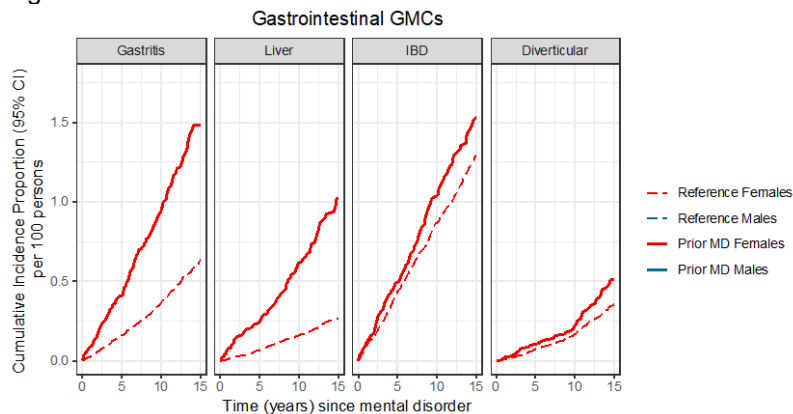

Figure S118.5 – Urogenital Conditions  
Urogenital GMCs

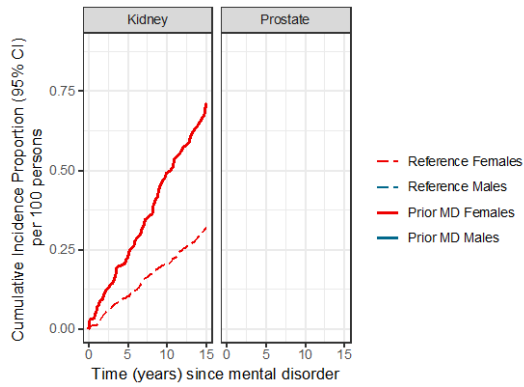

Figure S118.6 – Musculoskeletal Conditions  
Musculoskeletal GMCs

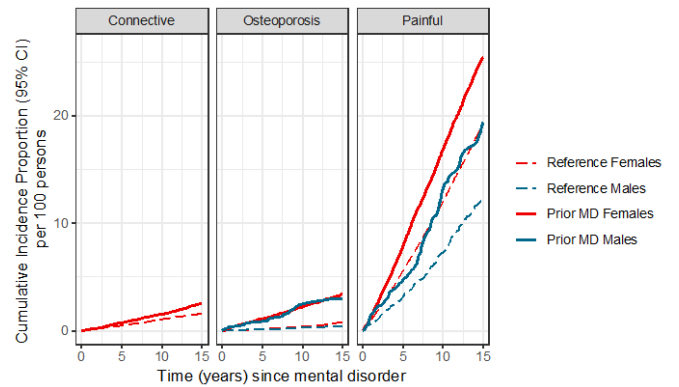

Figure S118.7 – Hematological Conditions  
Hematological GMCs

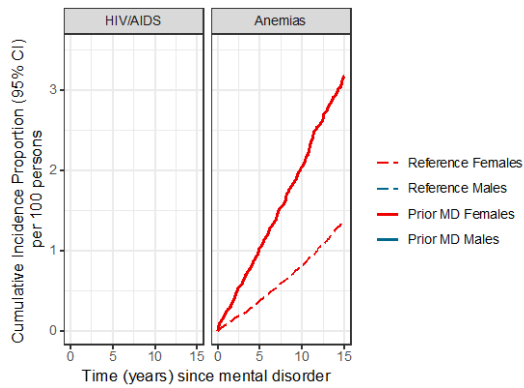

Figure S118.8 – Cancers  
Cancer

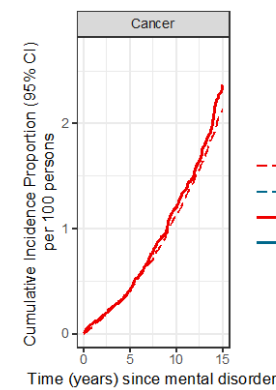

Figure S118.9 – Neurological Conditions  
Neurological GMCs

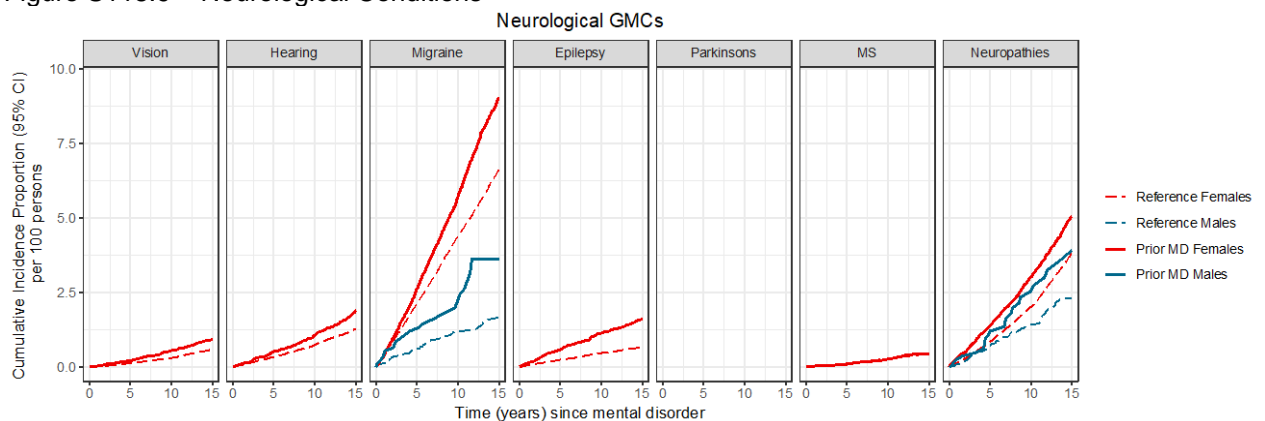

**Figures S119.1-S119.9. Sex-specific absolute risks of being diagnosed with general medical conditions after a first diagnosis of Personality Disorders**

Figure S119.1 – Circulatory Conditions

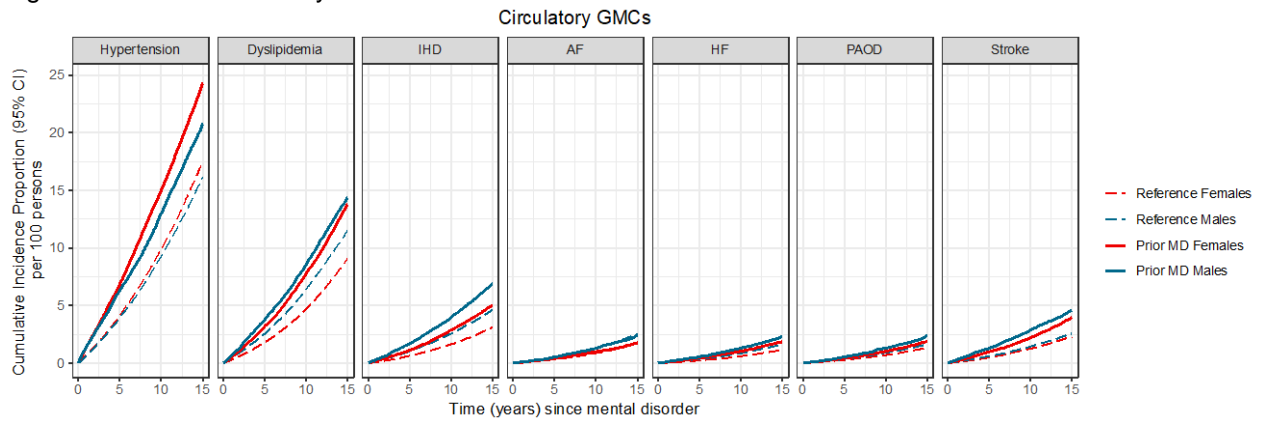

Figure S119.2 – Endocrine Conditions

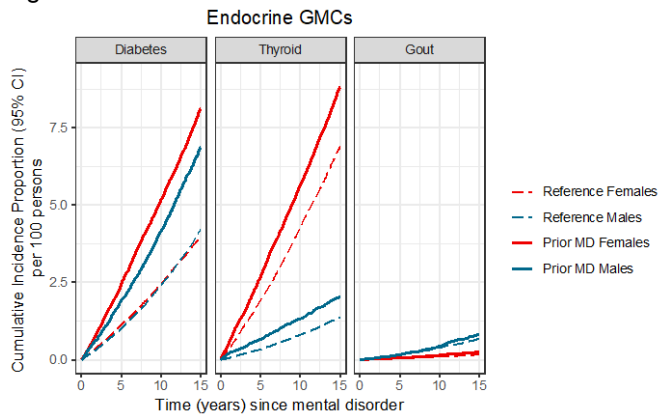

Figure S119.3 – Pulmonary Conditions

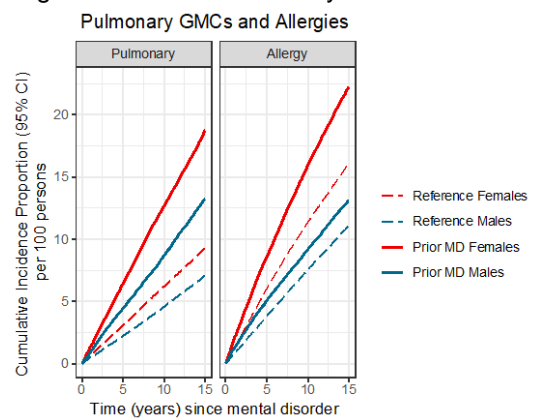

Figure S119.4 – Gastrointestinal Conditions

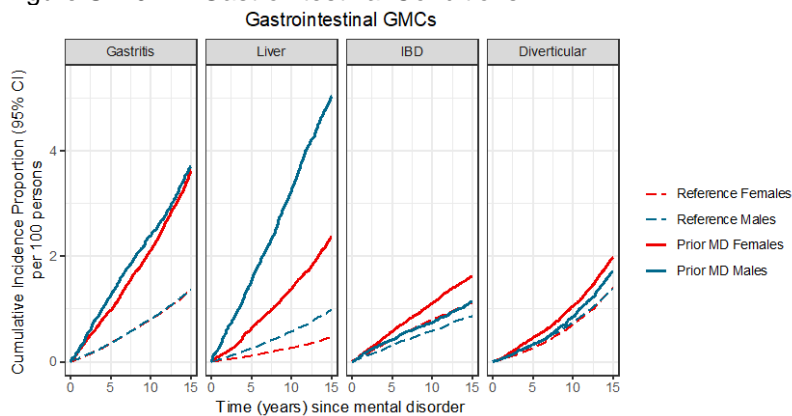



Figure S119.5 – Urogenital Conditions  
Urogenital GMCs

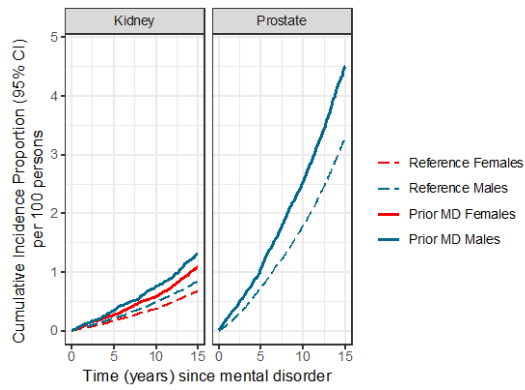

Figure S119.6 – Musculoskeletal Conditions  
Musculoskeletal GMCs

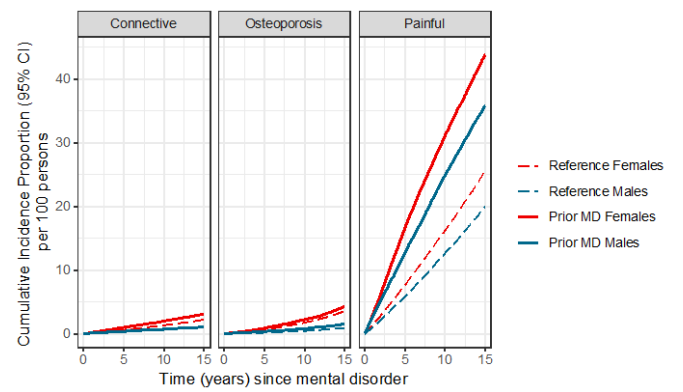

Figure S119.7 – Hematological Conditions  
Hematological GMCs

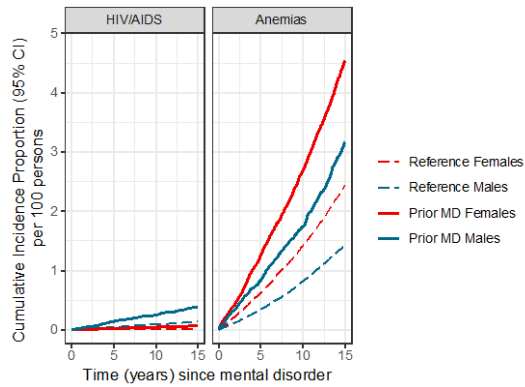

Figure S119.8 – Cancers  
Cancer

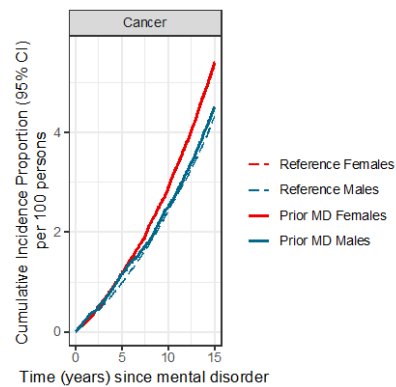

Figure S119.9 – Neurological Conditions  
Neurological GMCs

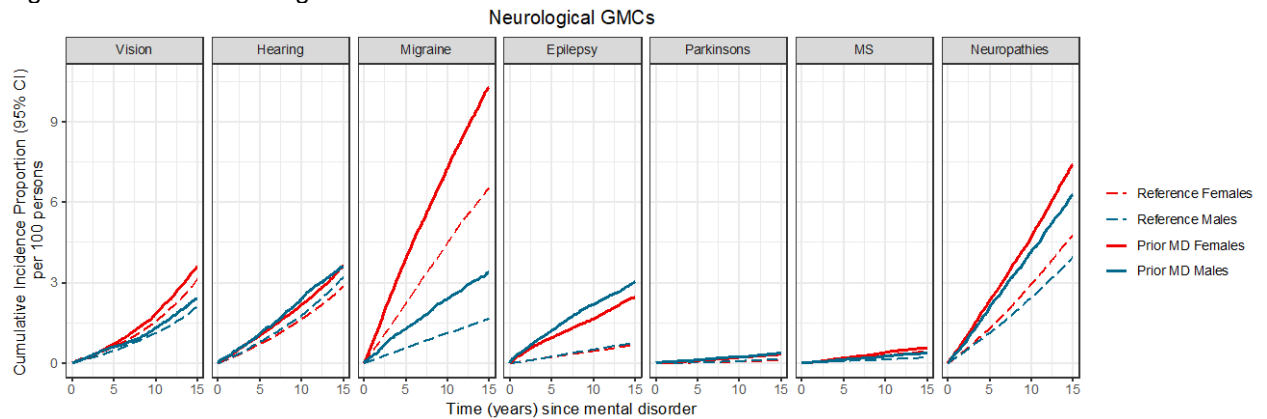

**Figures S120.1-S120.9. Sex-specific absolute risks of being diagnosed with general medical conditions after a first diagnosis of Intellectual Disabilities**

Figure S120.1 – Circulatory Conditions

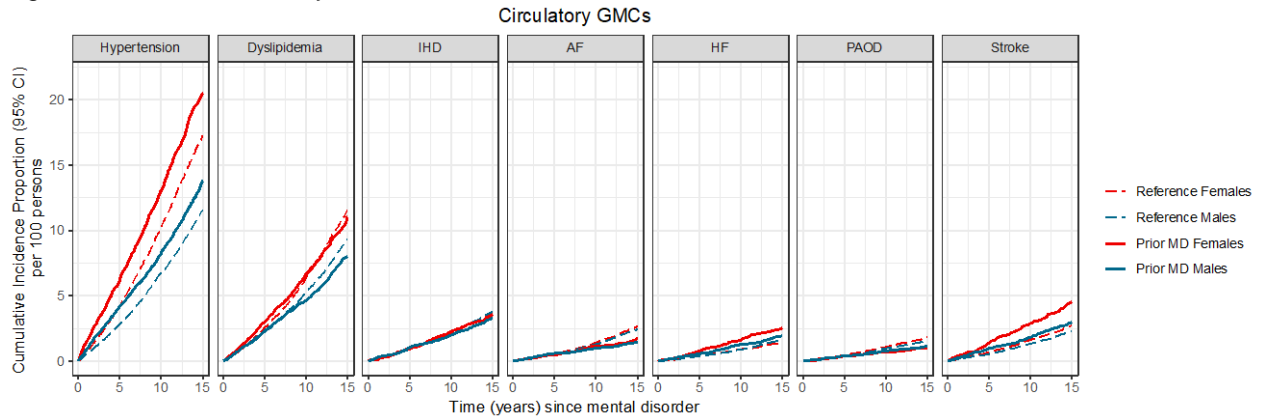

Figure S120.2 – Endocrine Conditions

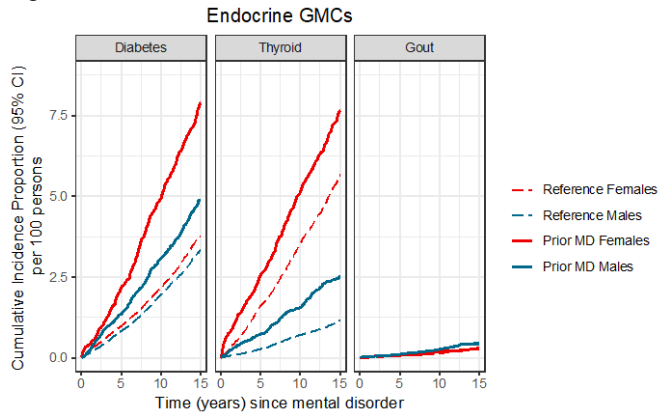

Figure S120.3 – Pulmonary Conditions

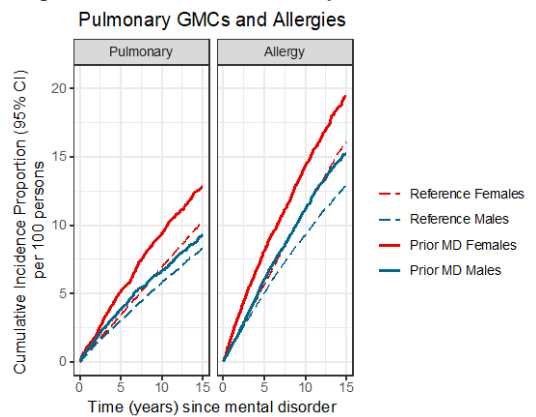

Figure S120.4 – Gastrointestinal Conditions

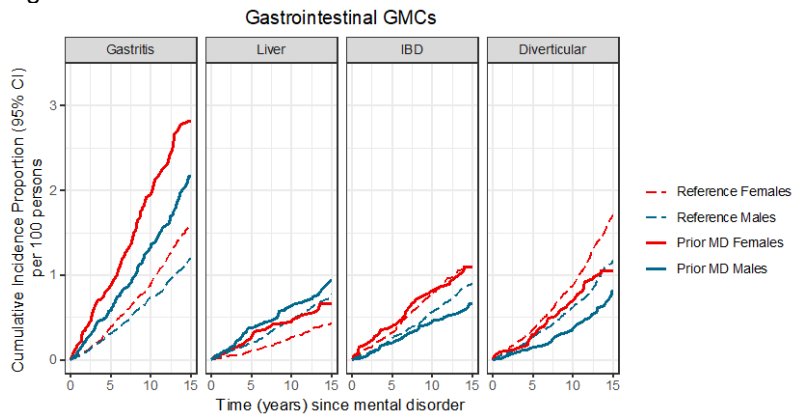

Figure S120.5 – Urogenital Conditions  
Urogenital GMCs

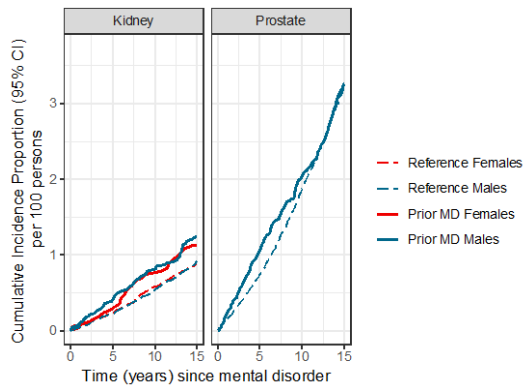

Figure S120.6 – Musculoskeletal Conditions  
Musculoskeletal GMCs

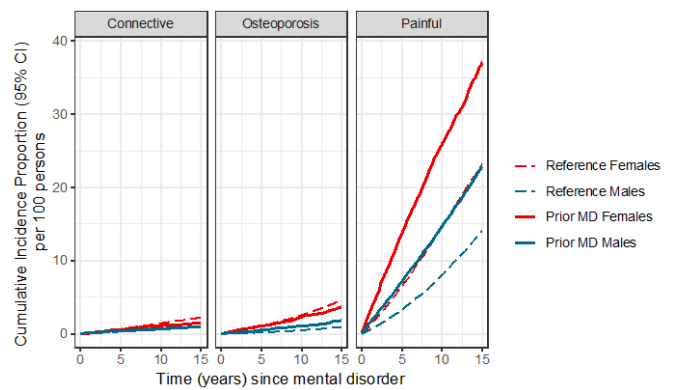

Figure S120.7 – Hematological Conditions  
Hematological GMCs

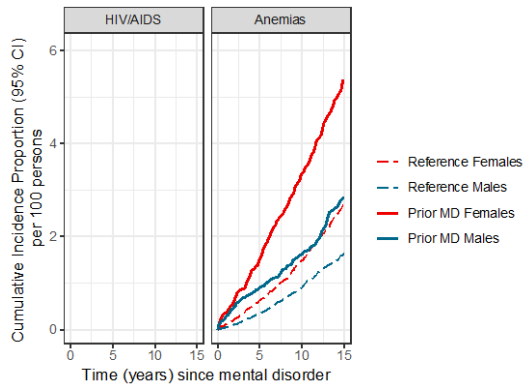

Figure S120.8 – Cancers  
Cancer

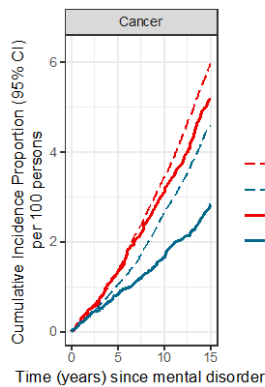

Figure S120.9 – Neurological Conditions

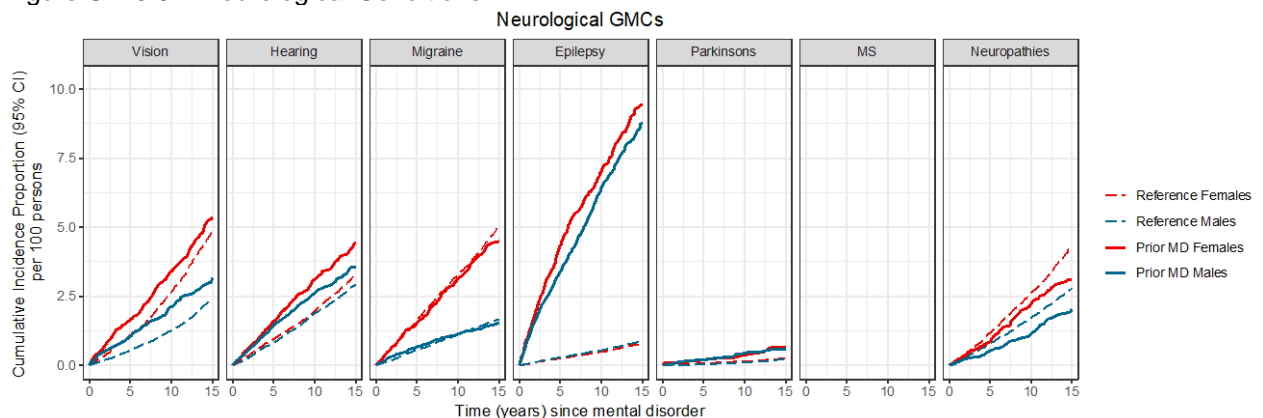

**Figures S121.1-S121.9. Sex-specific absolute risks of being diagnosed with general medical conditions after a first diagnosis of Developmental Disorders**

Figure S121.1 – Circulatory Conditions

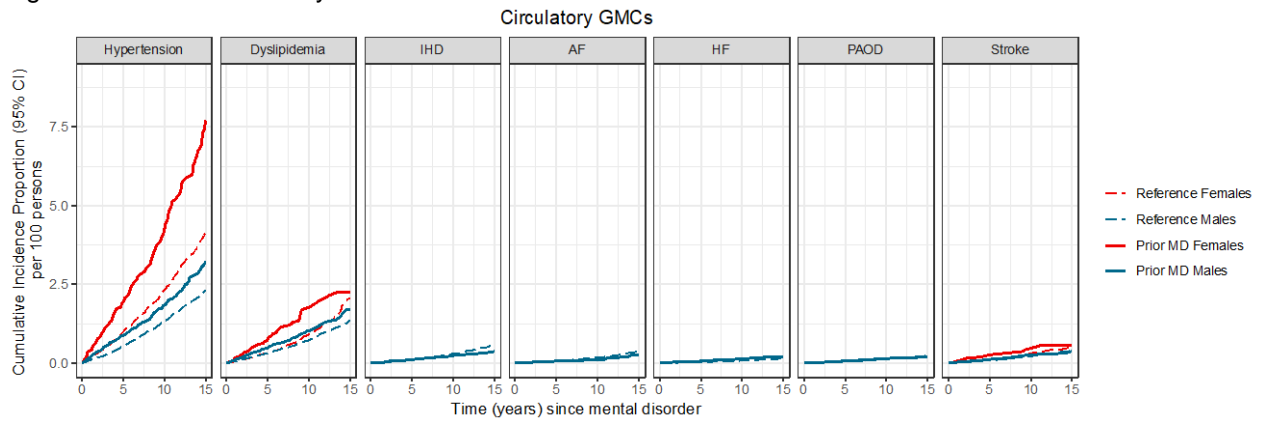

Figure S121.2 – Endocrine Conditions

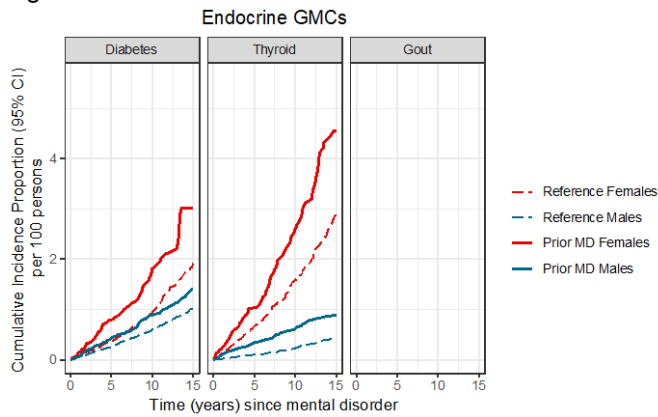

Figure S121.3 – Pulmonary Conditions

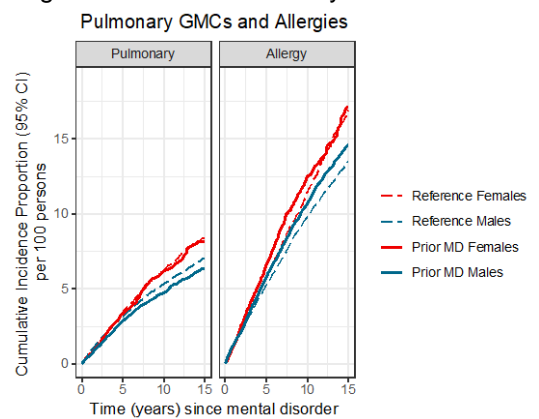

Figure S121.4 – Gastrointestinal Conditions

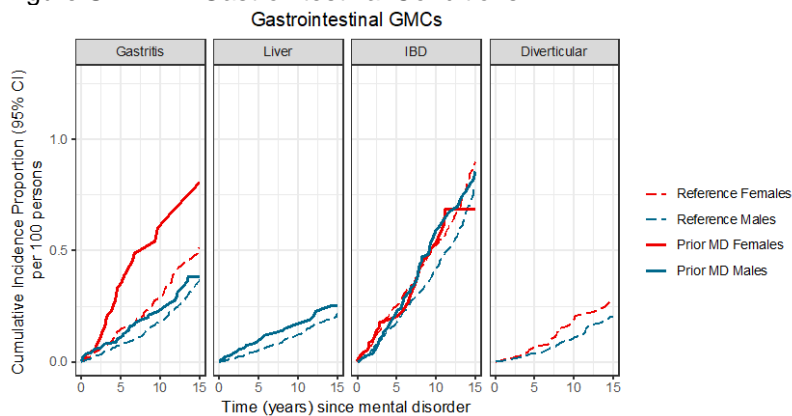

Figure S121.5 – Urogenital Conditions

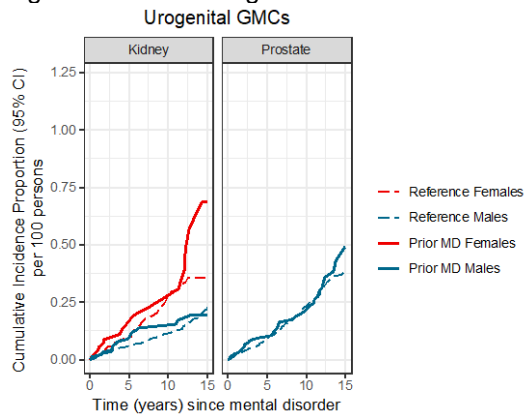

Figure S121.6 – Musculoskeletal Conditions

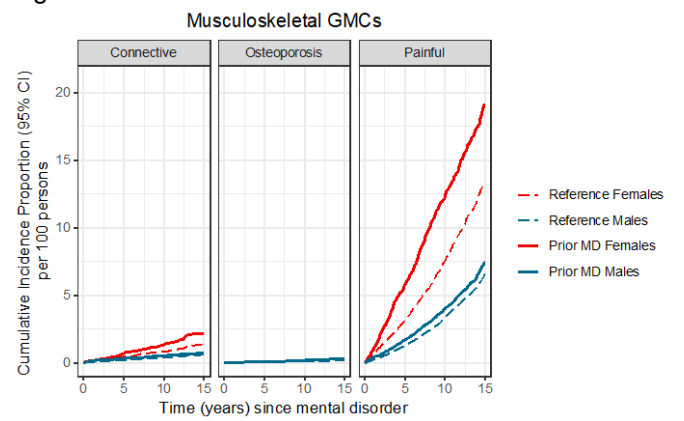

Figure S121.7 – Hematological Conditions

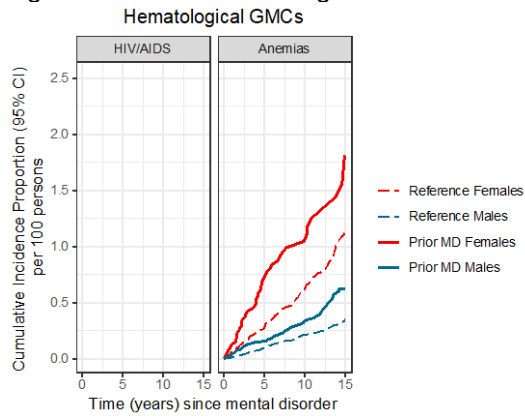

Figure S121.8 – Cancers

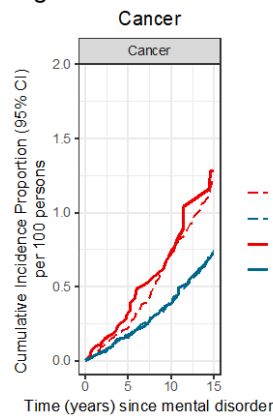

Figure S121.9 – Neurological Conditions

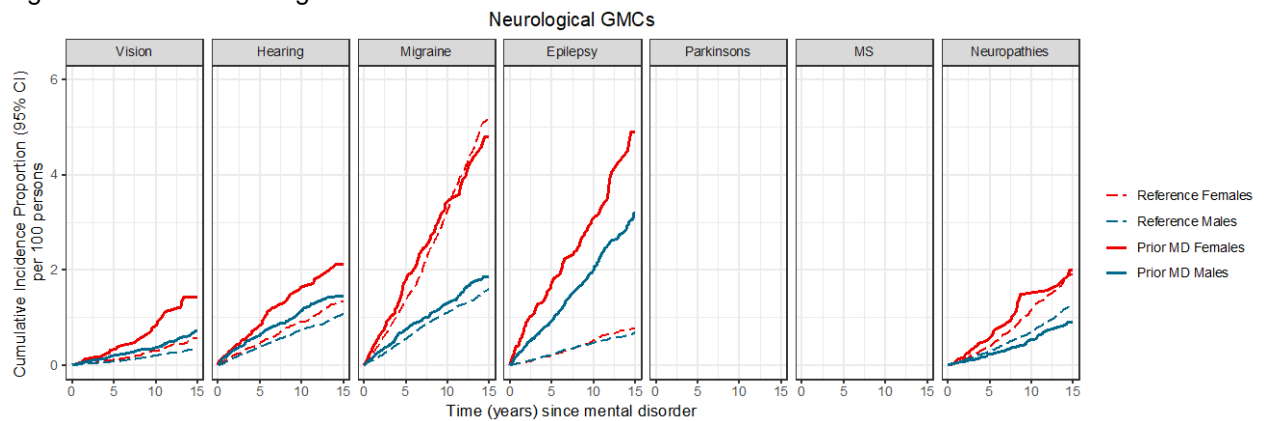

**Figures S122.1-S122.9. Sex-specific absolute risks of being diagnosed with general medical conditions after a first diagnosis of Behavioral Disorders**

Figure S122.1 – Circulatory Conditions

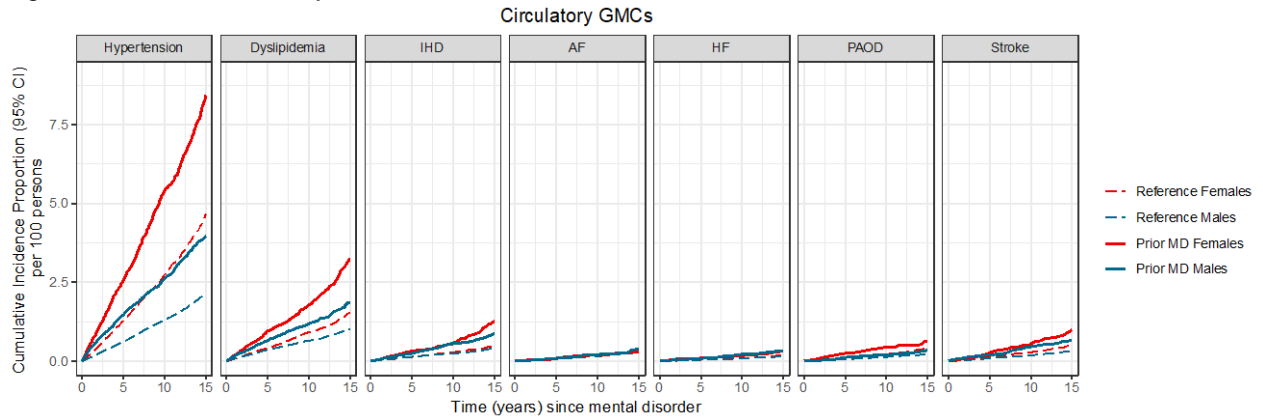

Figure S122.2 – Endocrine Conditions

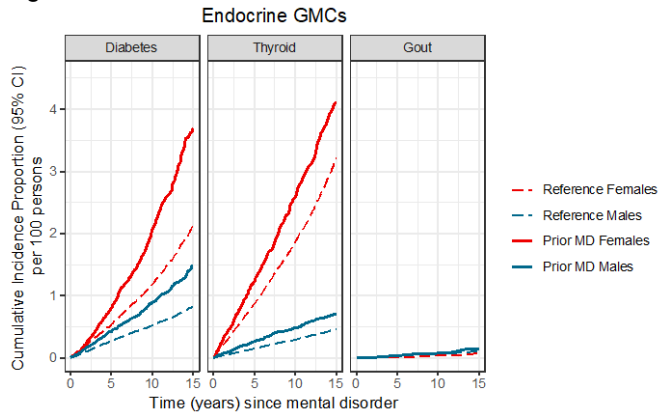

Figure S122.3 – Pulmonary Conditions

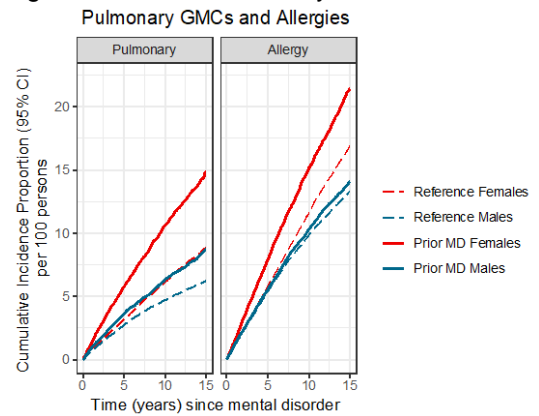

Figure S122.4 – Gastrointestinal Conditions

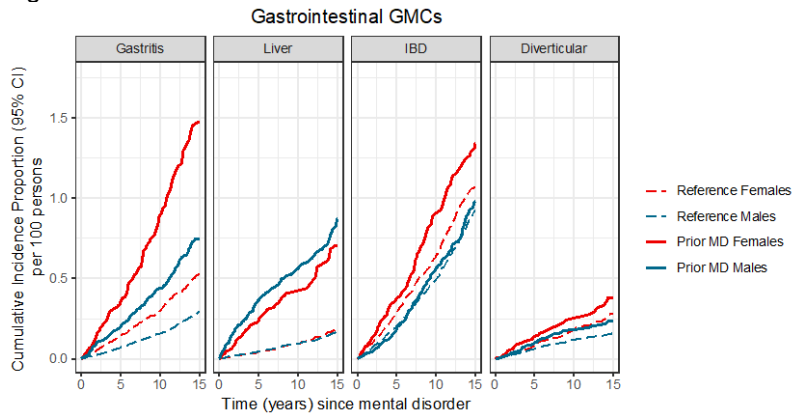

Figure S122.5 – Urogenital Conditions  
Urogenital GMCs

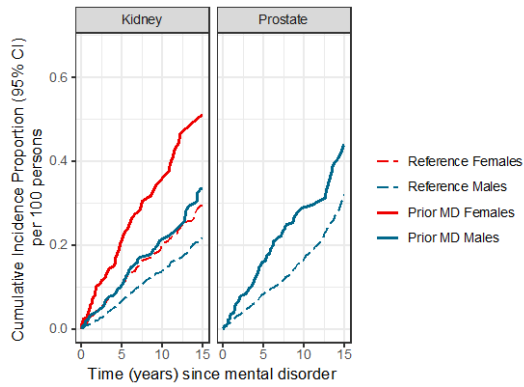

Figure S122.6 – Musculoskeletal Conditions  
Musculoskeletal GMCs

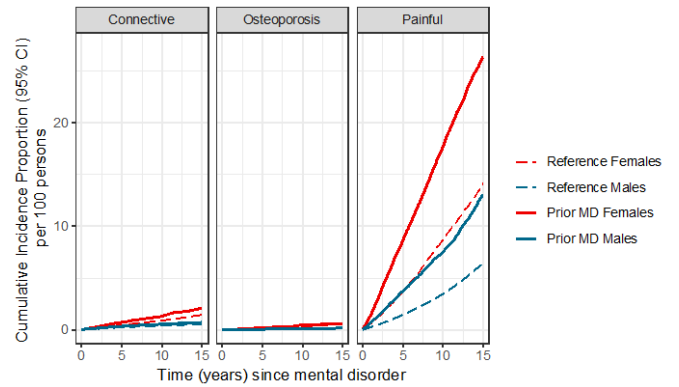

Figure S122.7 – Hematological Conditions  
Hematological GMCs

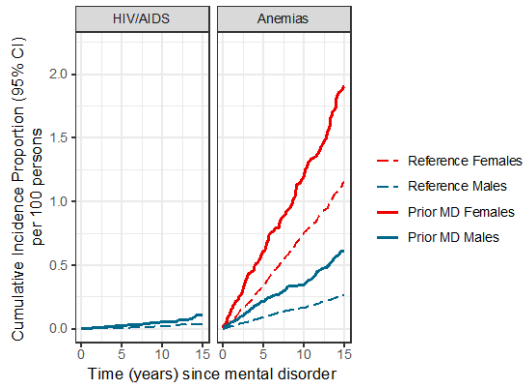

Figure S122.8 – Cancers  
Cancer

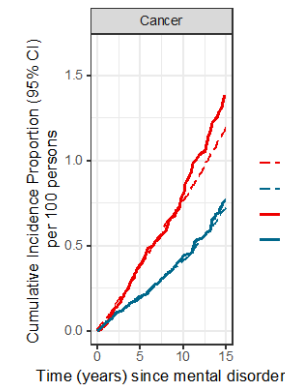

Figure S122.9 – Neurological Conditions

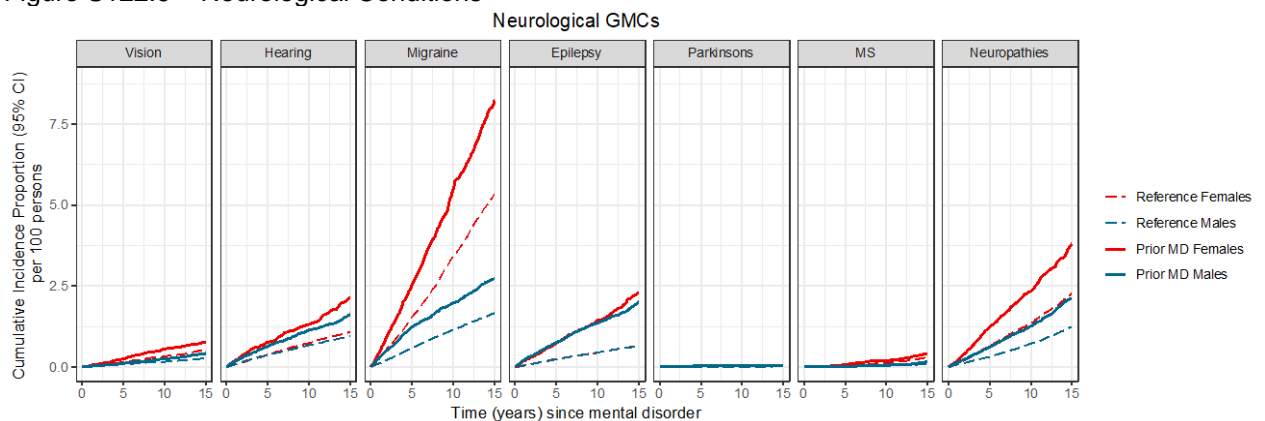

**Figures S123-S142. Absolute risks of specific general medical conditions after a diagnosis of mental disorders, depending on age at first onset of the mental disorder**

The following set of figures shows the sex- and time-specific absolute risks of being diagnosed with all general medical conditions after being previously diagnosed with one of the mental disorders, organized by medical condition category. They show the cumulative incidence proportions (CIPs) and 95% confidence intervals (95% CIs) estimated across all ages of being diagnosed with each general medical condition (shown as label at the top of each panel). Each person diagnosed with a specific mental disorder was matched to up to five 'reference individuals' of the same sex and born within 30 days of them. CIPs are shown for both those who were diagnosed with a specific mental disorder from the time of diagnosis (bold, solid line) and the reference group (dashed lines).

Two graphs are provided for each mental disorder: CIPs for all persons (black lines) and sex-specific CIPs (males indicated by blue lines, females by red). Confidence intervals are displayed only for those with prior mental disorders, as the 95% CIs for the reference group will be proportional to those for people with prior mental disorders, but smaller. In some cases, 95% CIs are too small to be visible.

The horizontal axes show the time since first diagnosis of the mental disorder (or since diagnosis of the person the reference individuals were matched to). The vertical axes show the cumulative incidence proportions and 95% CIs (note these axes vary for each set of graphs).

Estimates with fewer than 50 persons at risk or fewer than 15 cases are not shown. Where numbers were too small to show CIPs for those with mental disorders, reference CIPs are not displayed either. Reference CIPs may be obscured by the CIPs for those with mental disorders if estimates are very similar throughout follow-up.

*Displaying estimates for all persons*

*The y-axis varies by graph, but ranges from 0-68*

- S123. Organic Disorders
- S124. Substance Use Disorders
- S125. Schizophrenia
- S126. Mood Disorders
- S127. Neurotic Disorders
- S128. Eating Disorders
- S129. Personality Disorders
- S130. Intellectual Disorders
- S131. Developmental Disorders
- S132. Behavioral Disorders

*Displaying sex-specific estimates*

*The y-axis varies by graph, but ranges from 0-71*

- S133. Organic Disorders
- S134. Substance Use Disorders
- S135. Schizophrenia
- S136. Mood Disorders
- S137. Neurotic Disorders
- S138. Eating Disorders
- S139. Personality Disorders
- S140. Intellectual Disorders
- S141. Developmental Disorders
- S142. Behavioral Disorders



**Figures S123.1-S123.31. Absolute risks of being diagnosed with general medical conditions after a first diagnosis of Organic Disorders**

**Figure S123.1 – Hypertension**

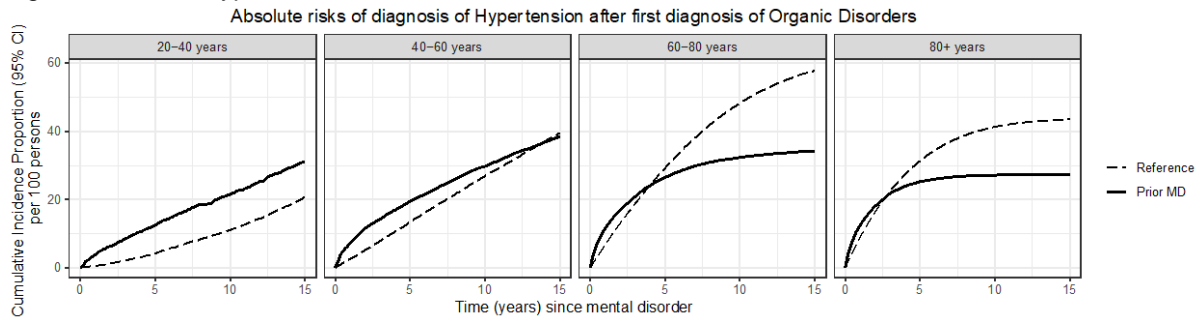

**Figure S123.2 – Dyslipidemia**

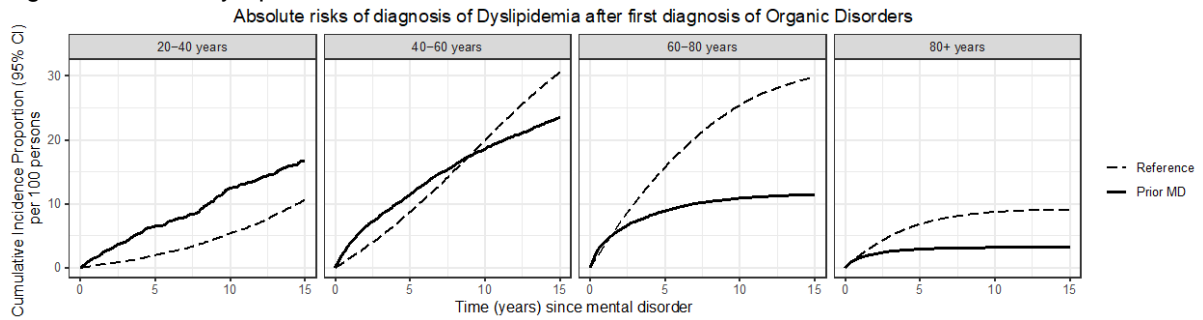

**Figure S123.3 – Ischemic Heart Disease**

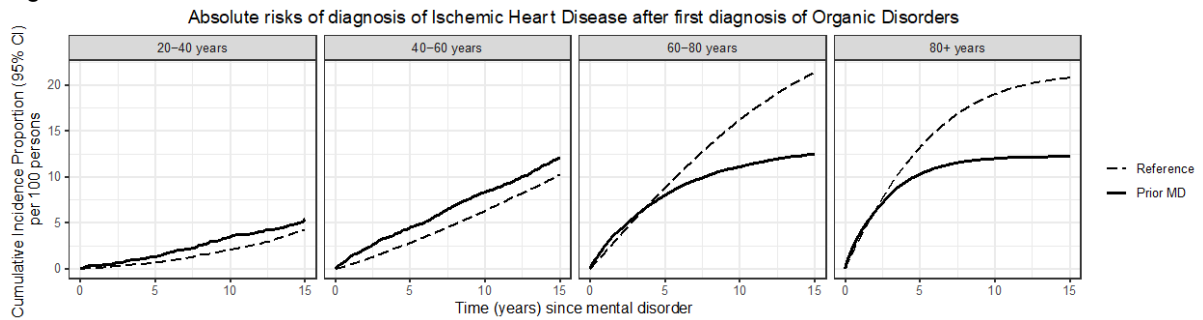

**Figure S123.4 – Atrial Fibrillation**

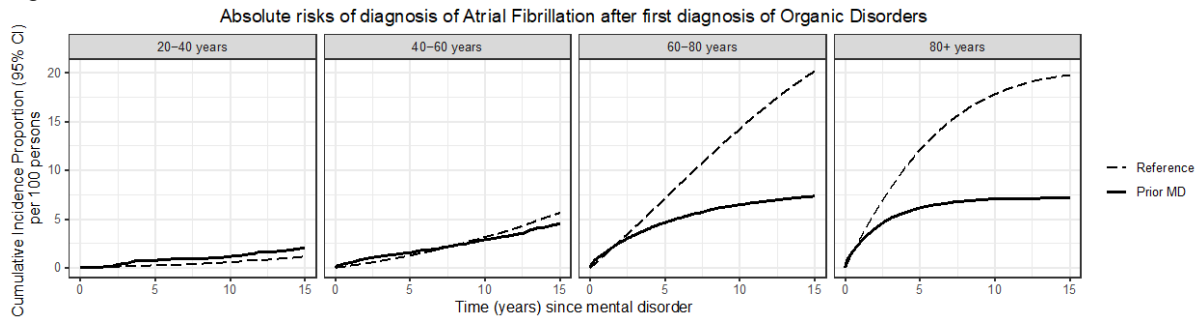

Figure S123.5 – Heart Failure

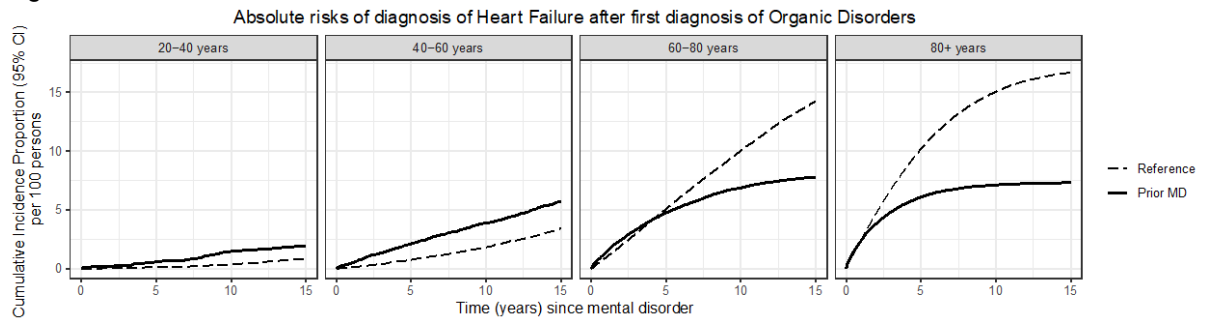

Figure S123.6 – Peripheral Artery Occlusive Disease

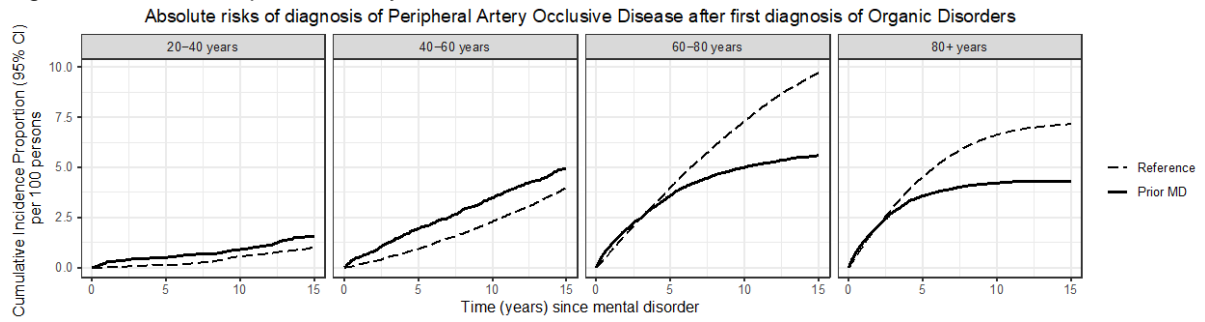

Figure S123.7 – Stroke

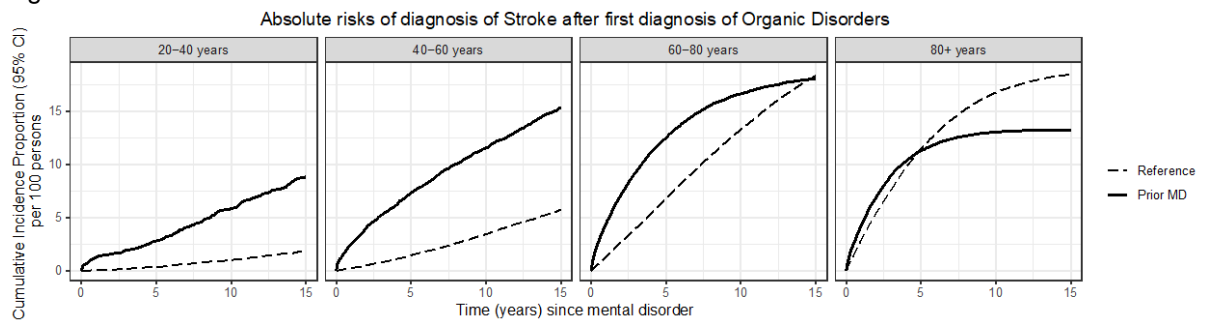

Figure S123.8 – Diabetes Mellitus

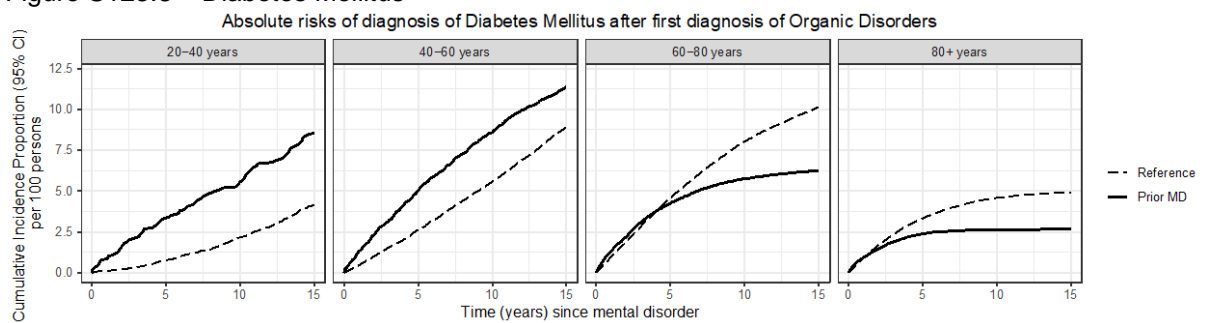

Figure S123.9 – Thyroid Disorders

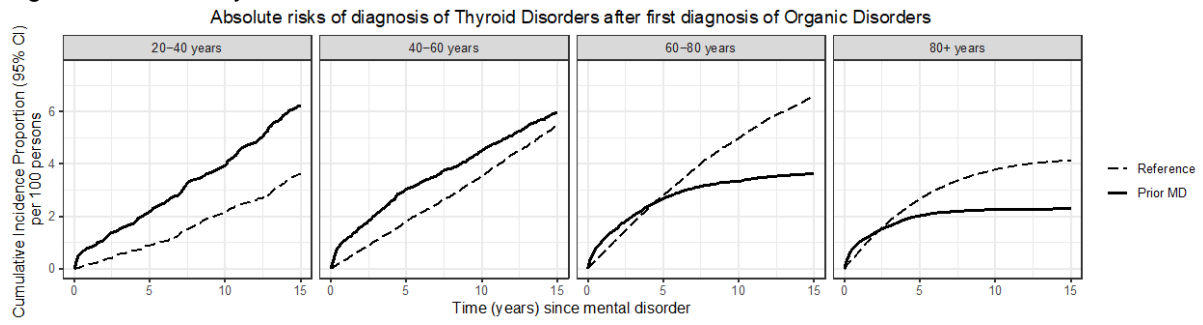

Figure S123.10 – Gout

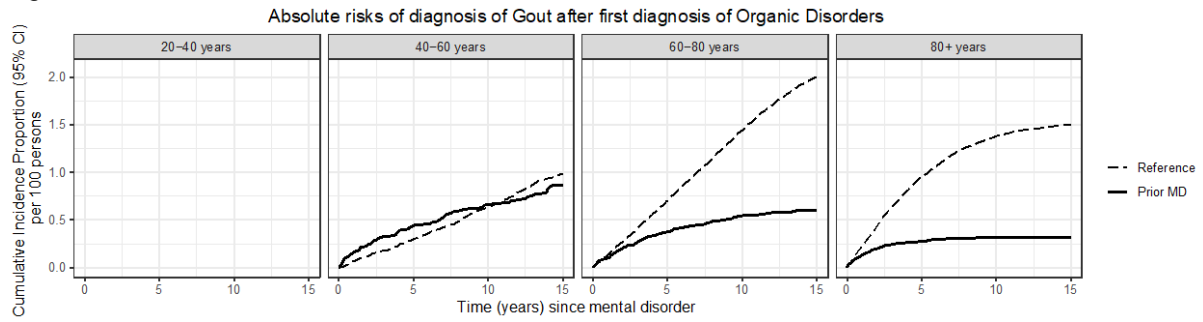

Figure S123.11 – Chronic Pulmonary Disease

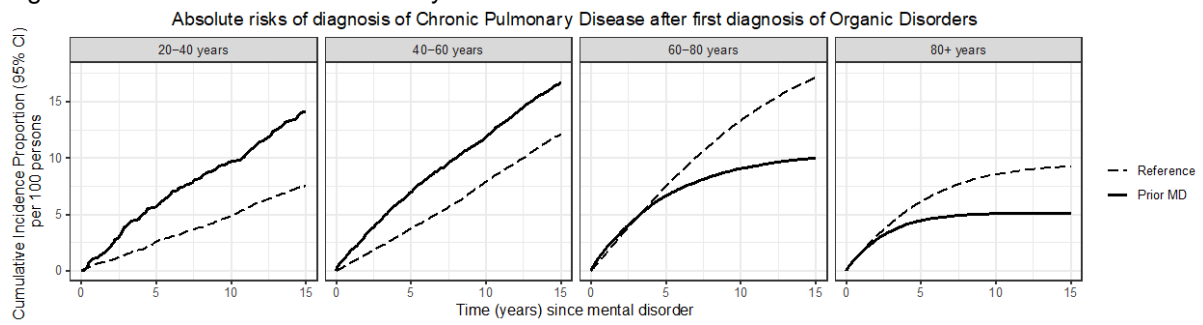

Figure S123.12 – Allergy

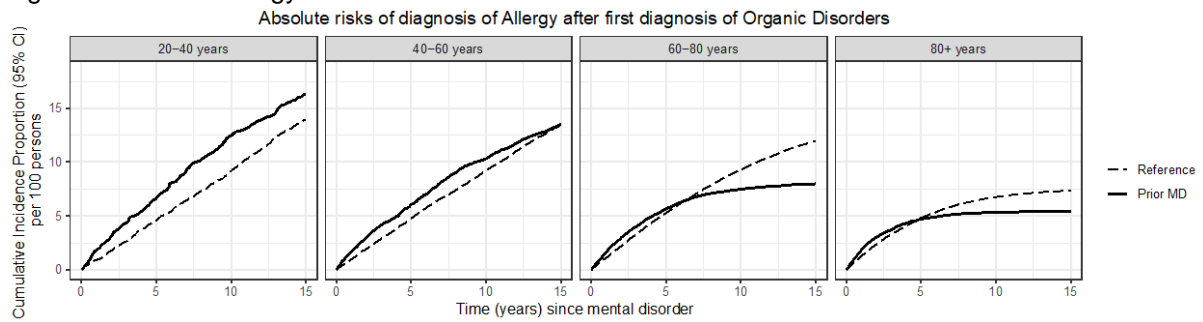

Figure S123.13 – Ulcer/Chronic Gastritis

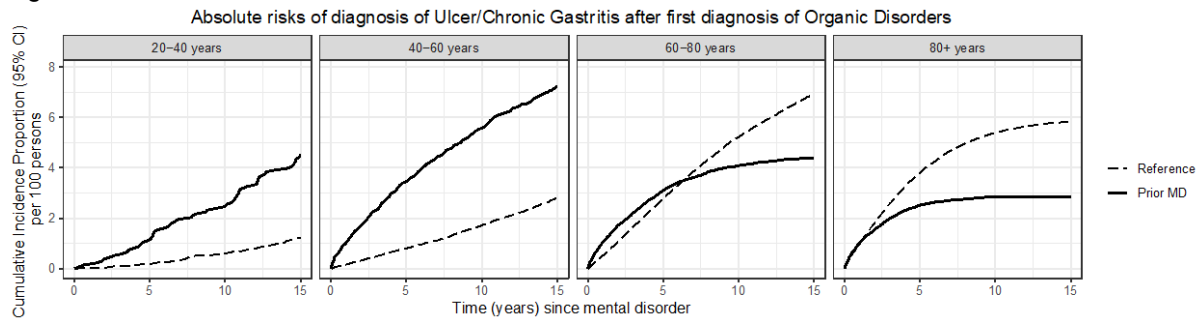

Figure S123.14 – Chronic Liver Disease

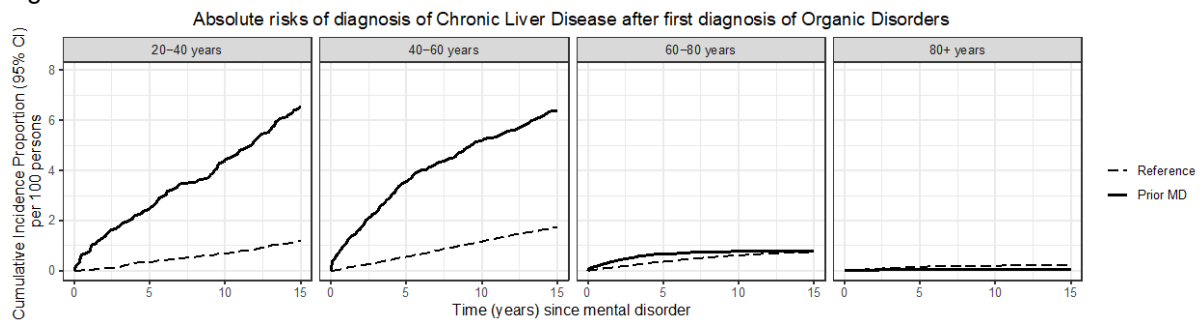

Figure S123.15 – Inflammatory Bowel Disease

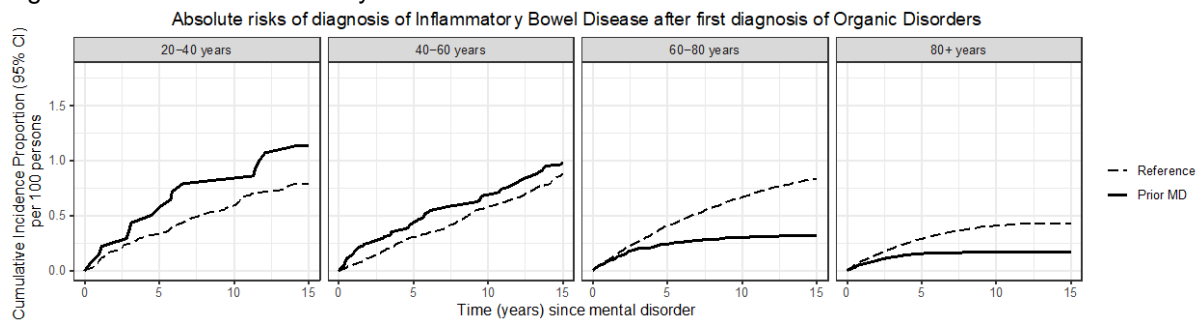

Figure S123.16 – Diverticular Disease of the Intestine

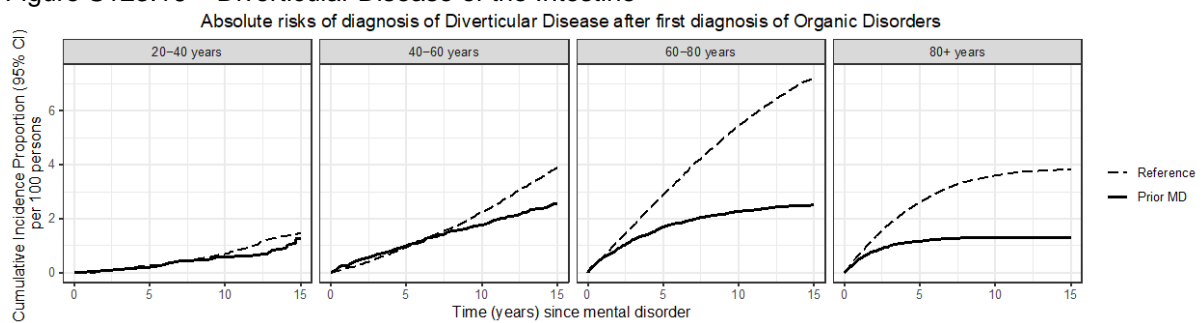

Figure S123.17 – Chronic Kidney Disease

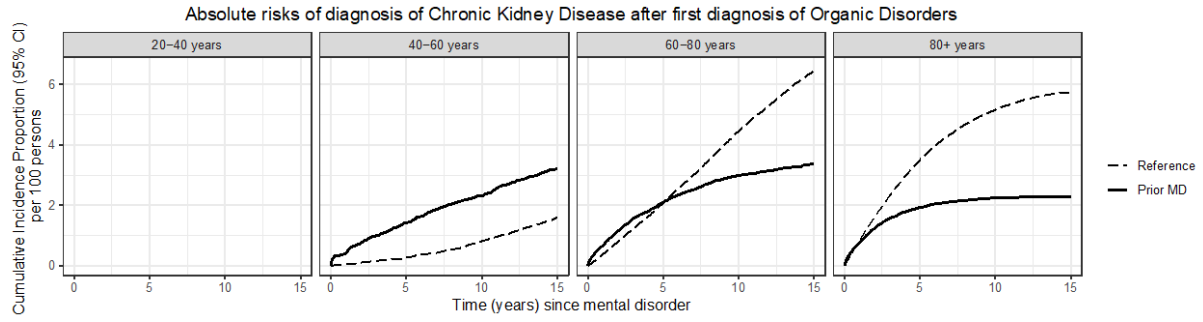

Figure S123.18 – Prostate Disorders

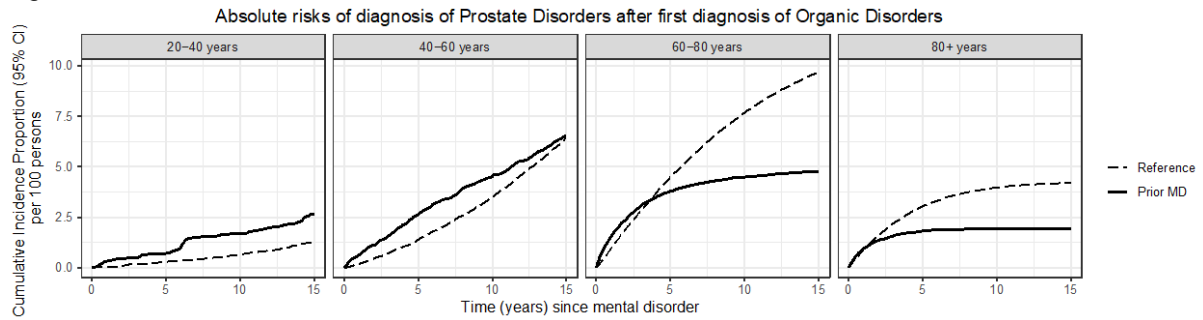

Figure S123.19 – Connective Tissue Disorders

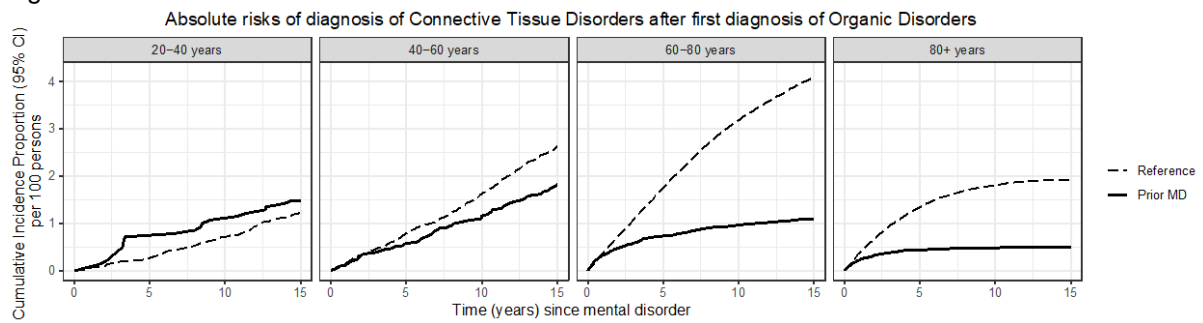

Figure S123.20 – Osteoporosis

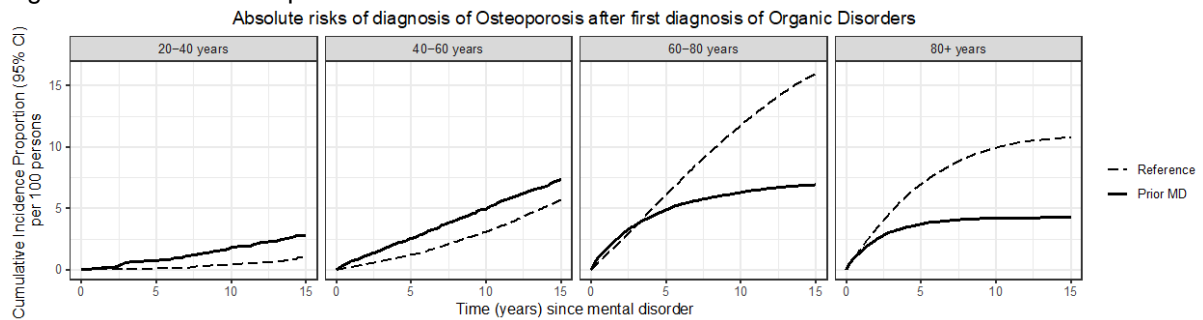

Figure S123.21 – Painful Conditions

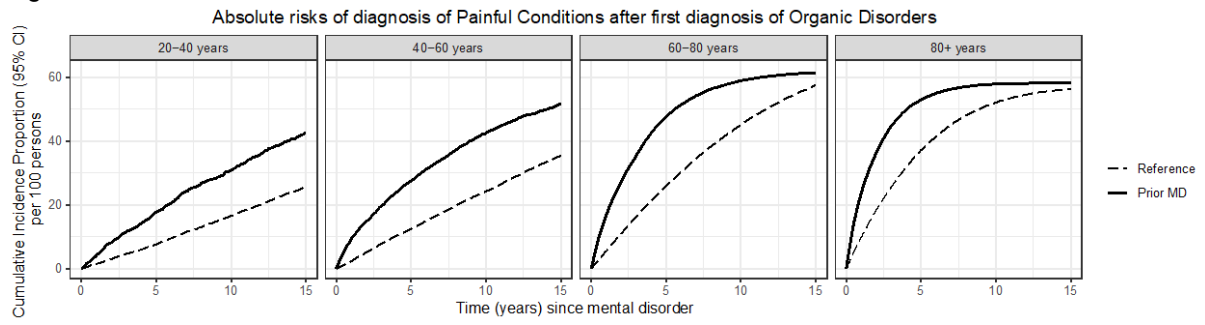

Figure S123.22 – HIV/AIDS

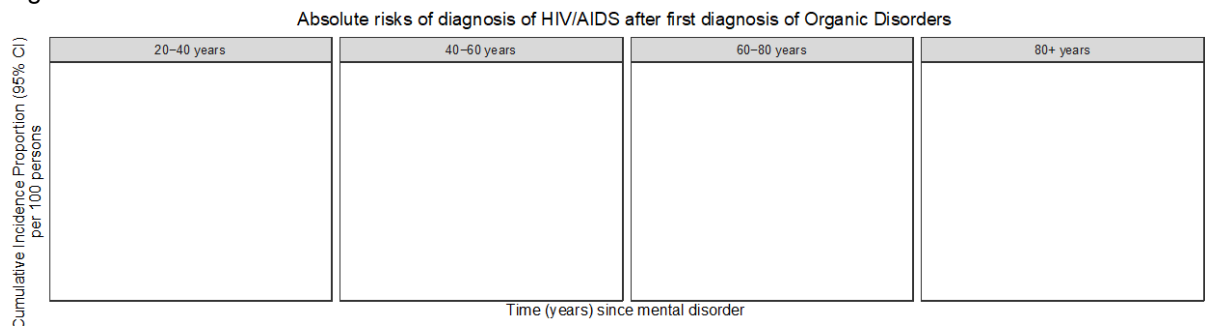

Figure S123.23 – Anemias

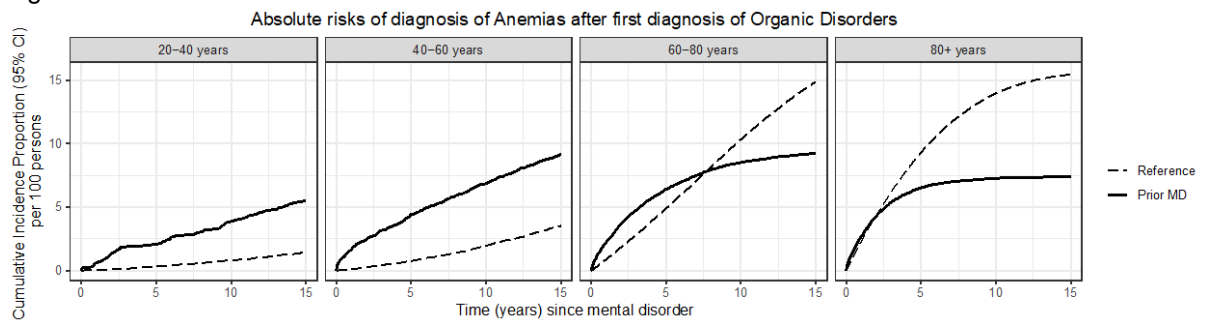

Figure S123.24 – Cancer

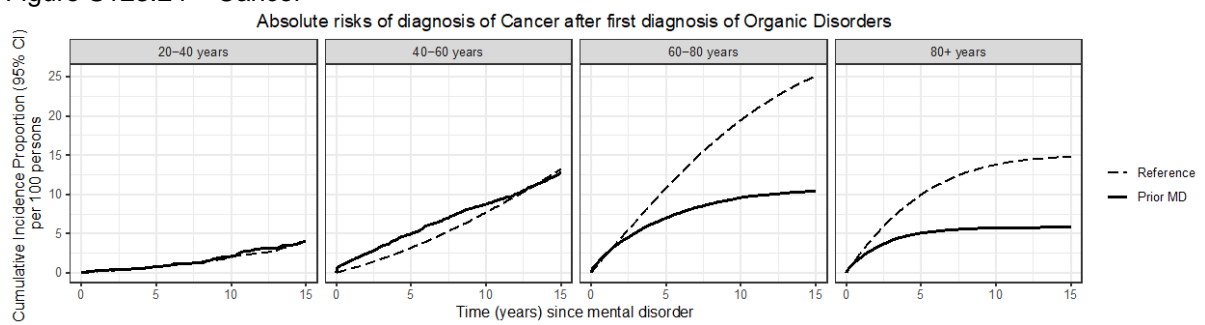

Figure S123.25 – Vision Problems

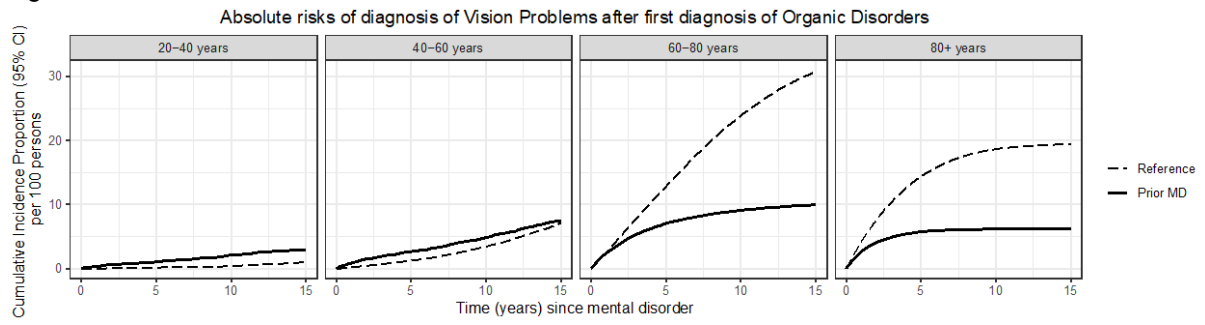

Figure S123.26 – Hearing Problems

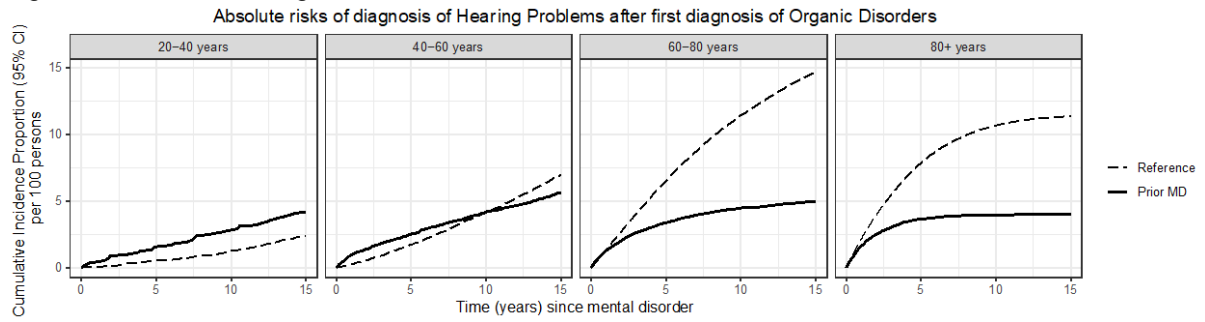

Figure S123.27 – Migraine

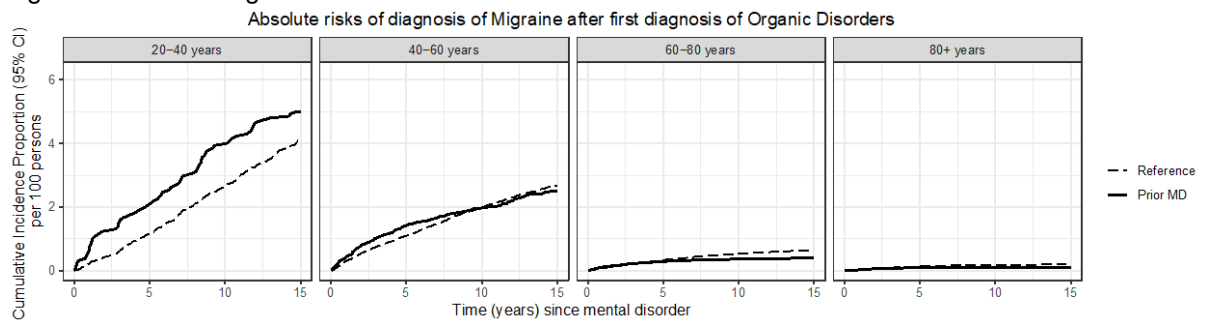

Figure S123.28 – Epilepsy

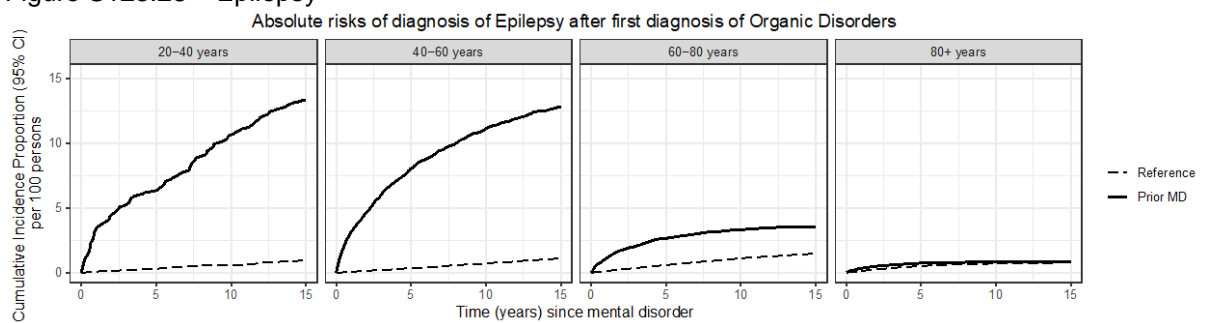

Figure S123.29 – Parkinson's Disease

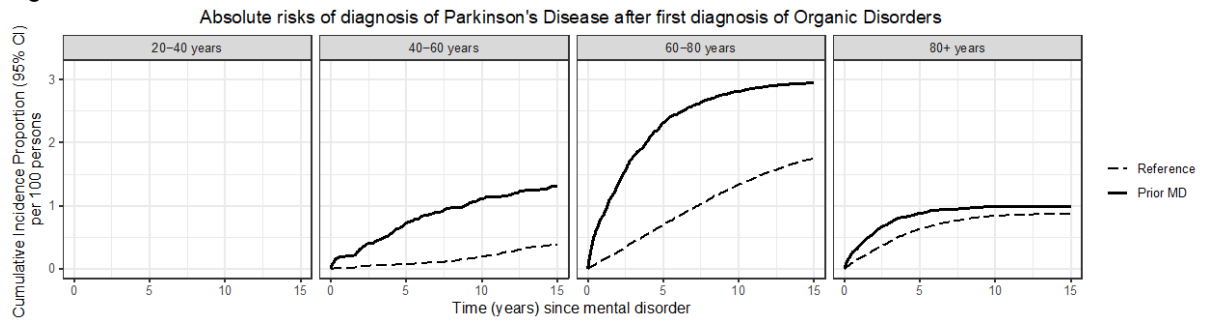

Figure S123.30 – Multiple Sclerosis

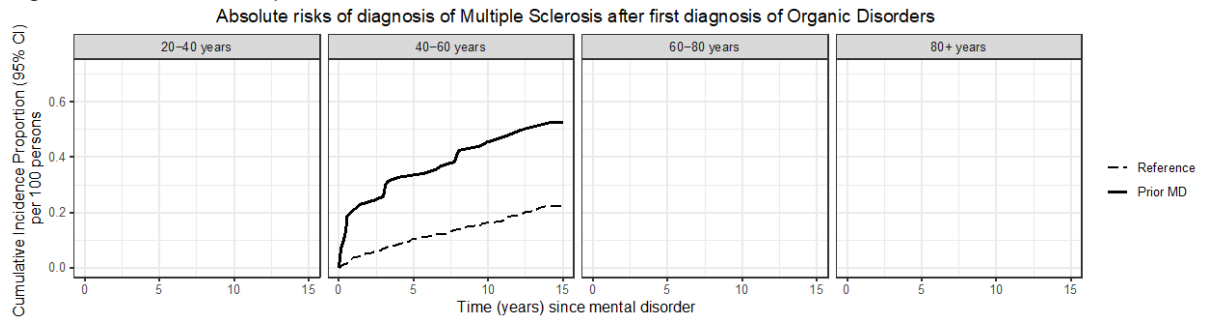

Figure S123.31 – Neuropathies

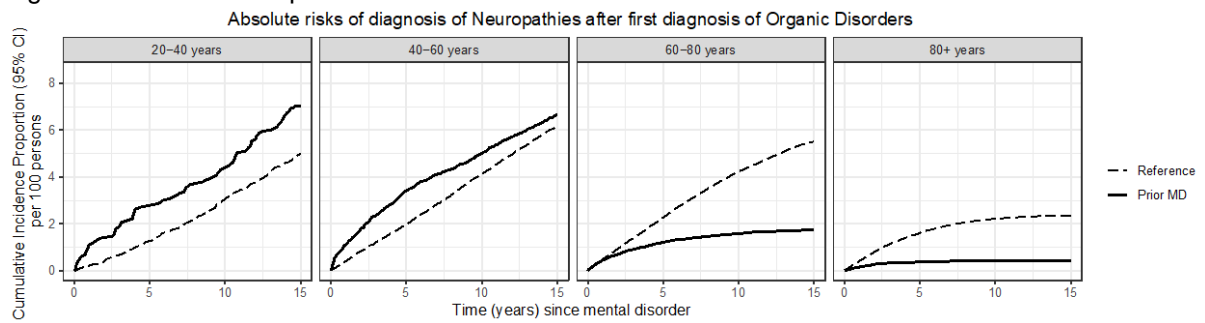



**Figures S124.1-S124.31. Absolute risks of being diagnosed with general medical conditions after a first diagnosis of Substance Use Disorders**

**Figure S124.1 – Hypertension**

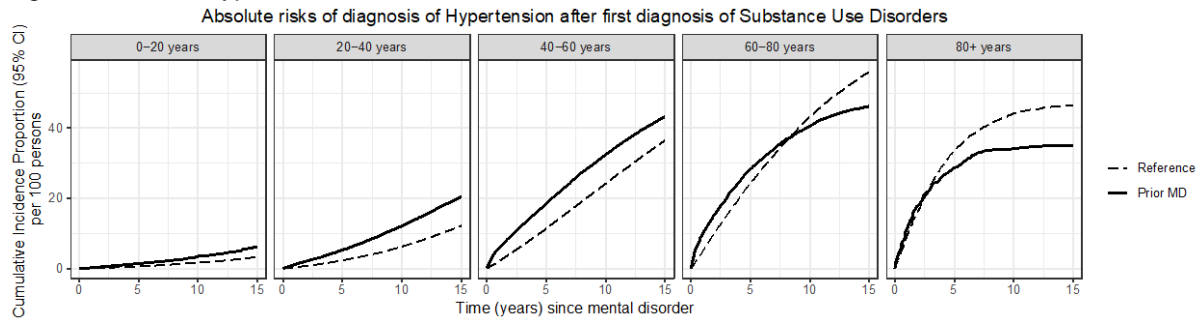

**Figure S124.2 – Dyslipidemia**

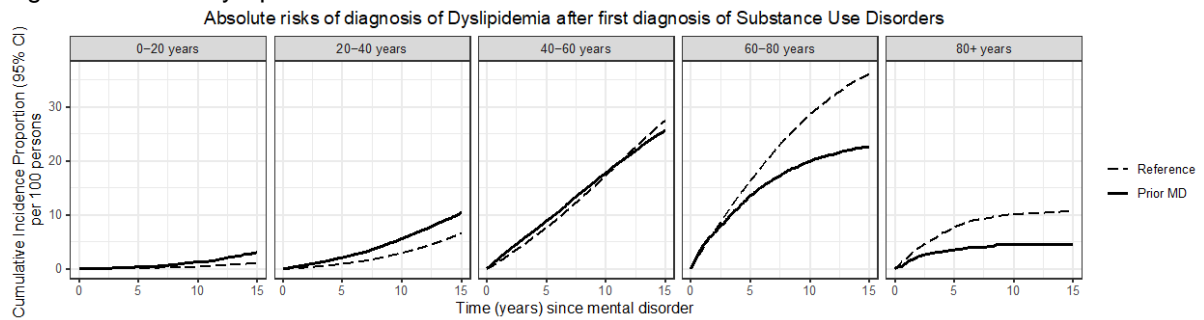

**Figure S124.3 – Ischemic Heart Disease**

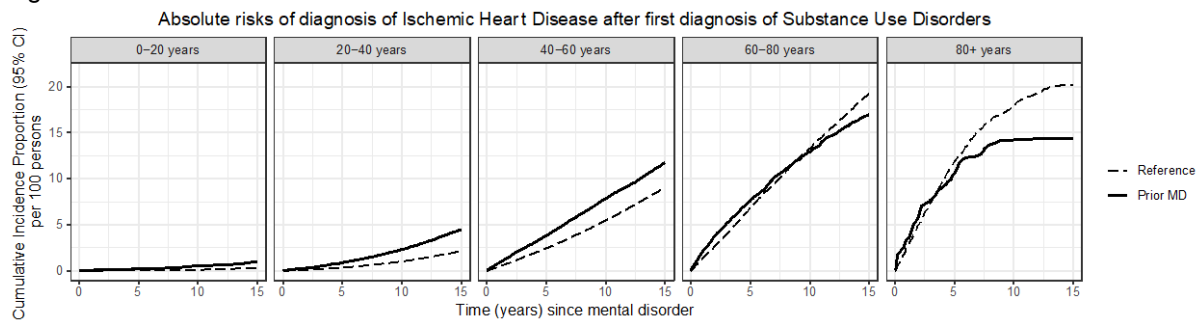

**Figure S124.4 – Atrial Fibrillation**

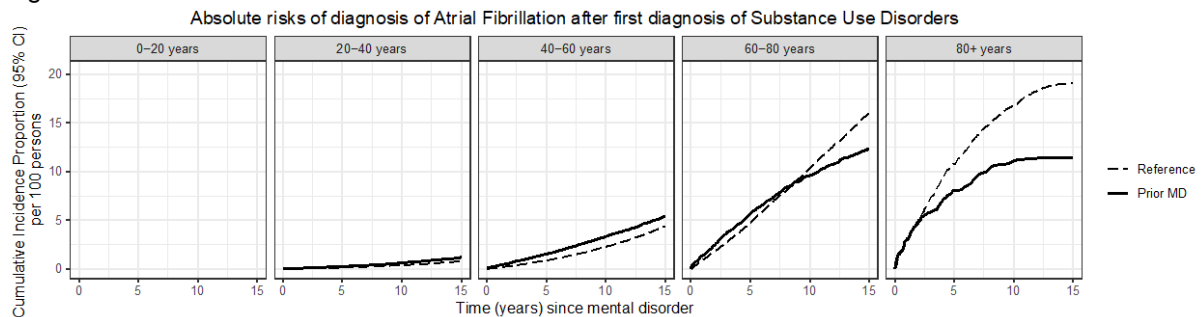

Figure S124.5 – Heart Failure

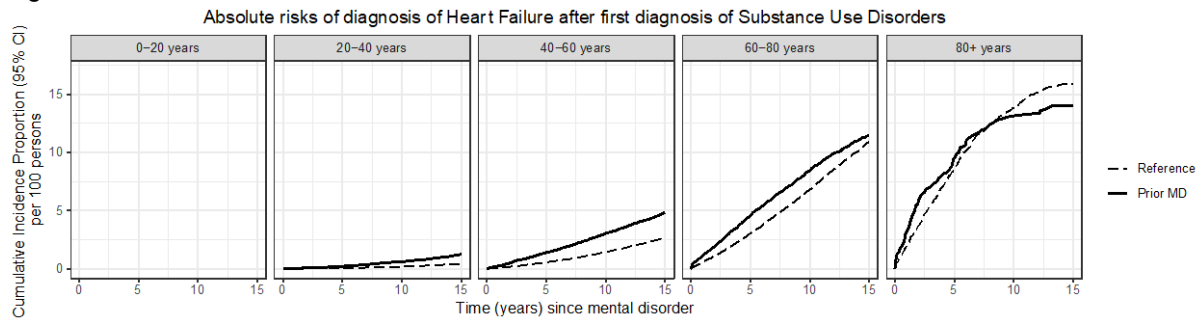

Figure S124.6 – Peripheral Artery Occlusive Disease

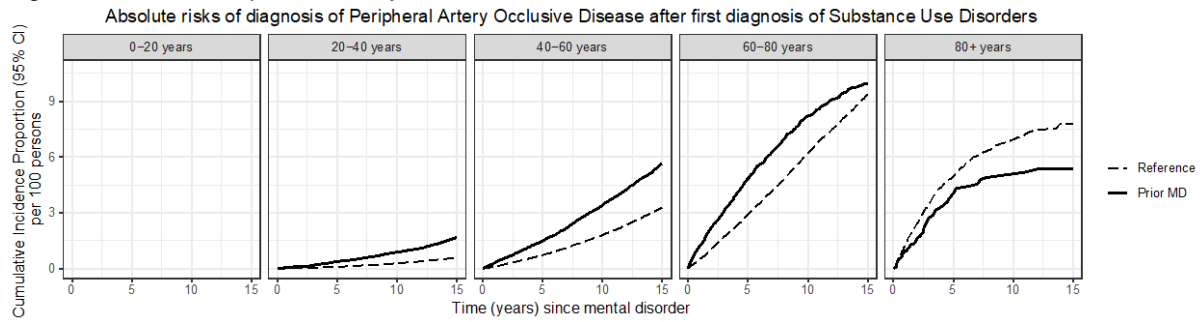

Figure S124.7 – Stroke

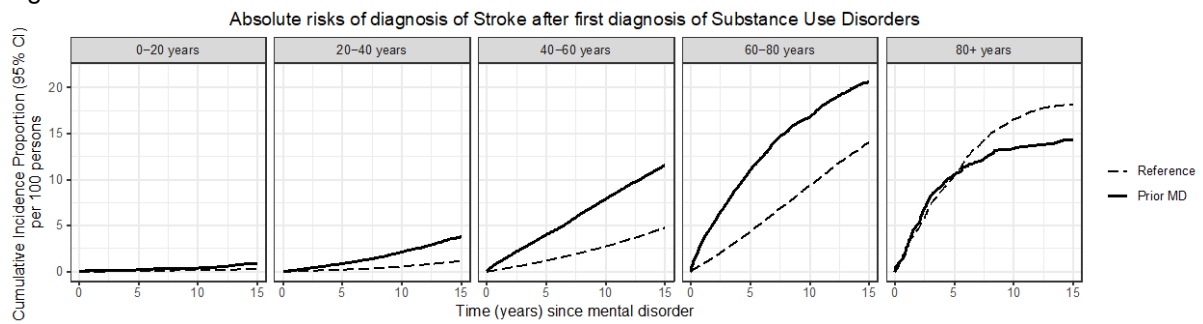

Figure S124.8 – Diabetes Mellitus

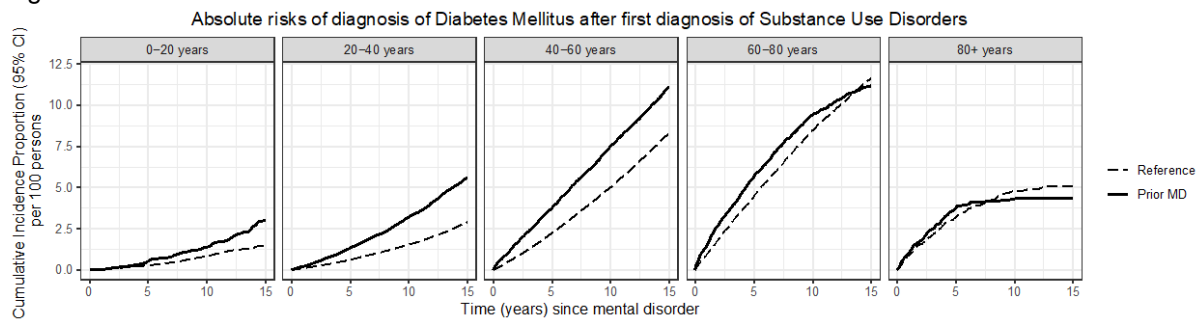

Figure S124.9 – Thyroid Disorder

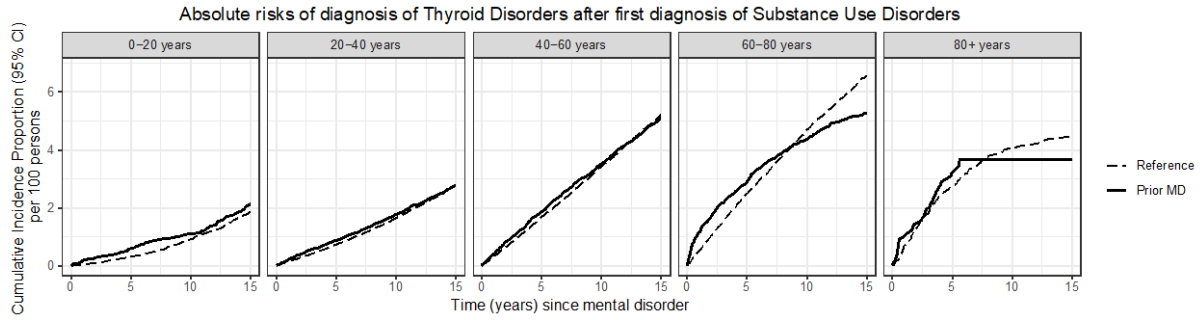

Figure S124.10 – Gout

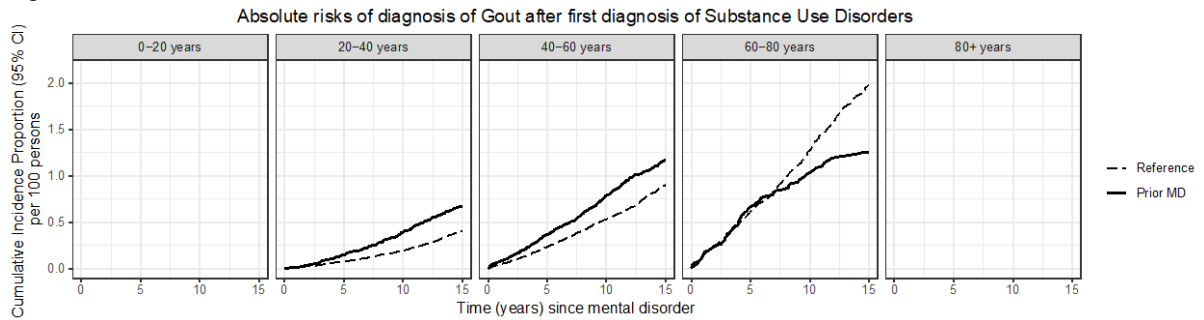

Figure S124.11 – Chronic Pulmonary Disease

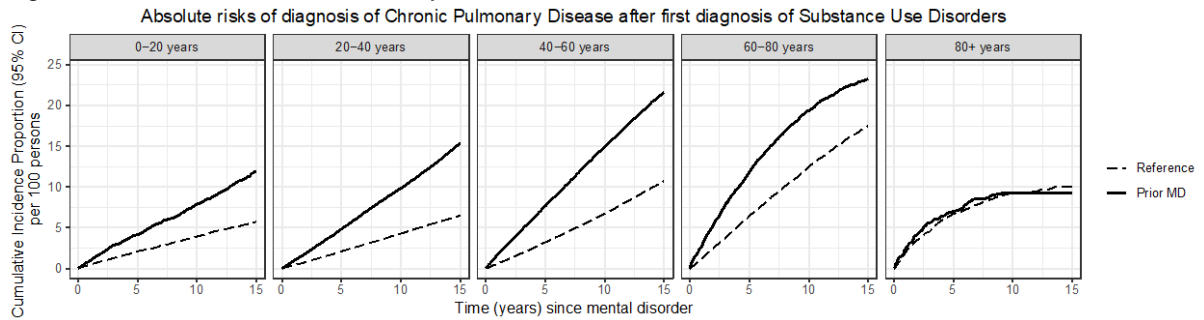

Figure S124.12 – Allergy

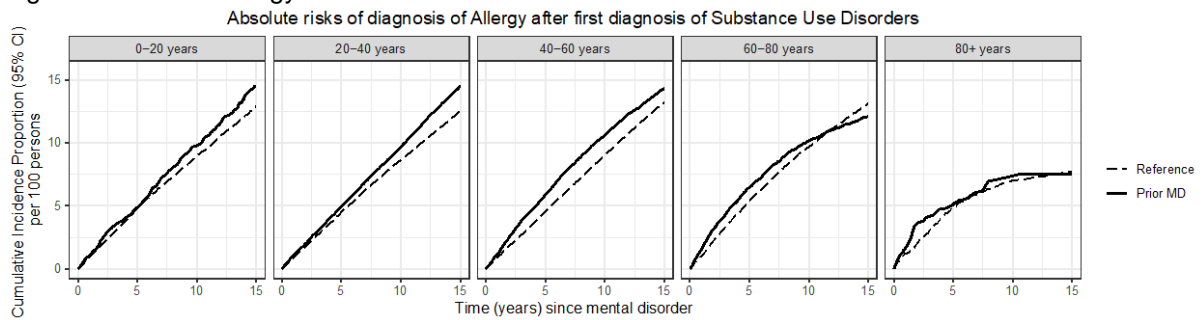

Figure S124.13 – Ulcer/Chronic Gastritis

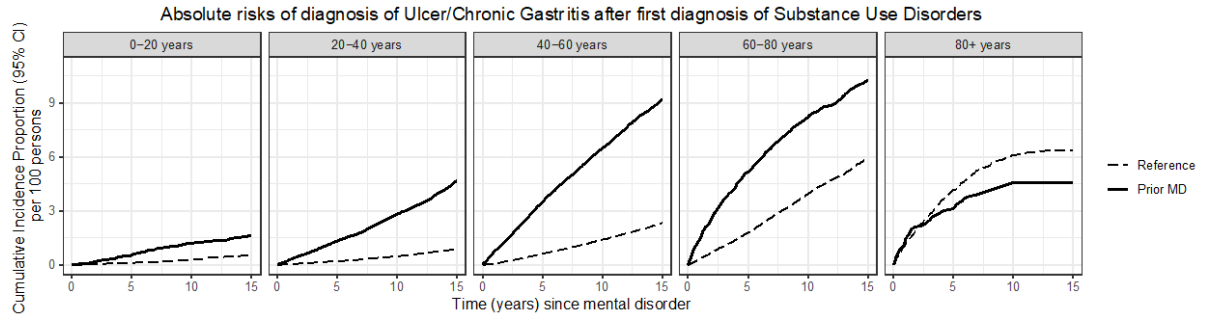

Figure S124.14 – Chronic Liver Disease

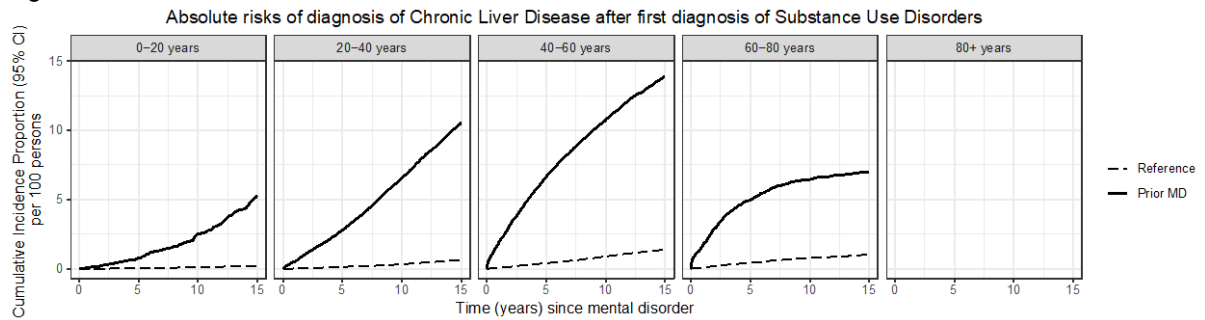

Figure S124.15 – Inflammatory Bowel Disease

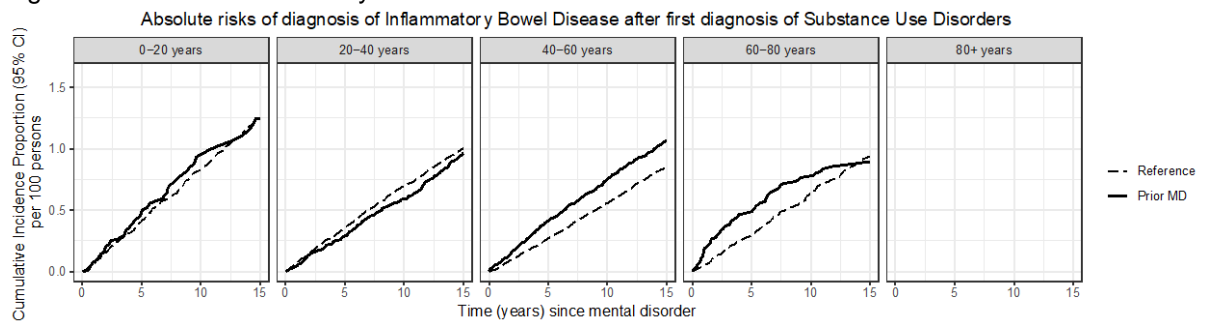

Figure S124.16 – Diverticular Disease of the Intestine

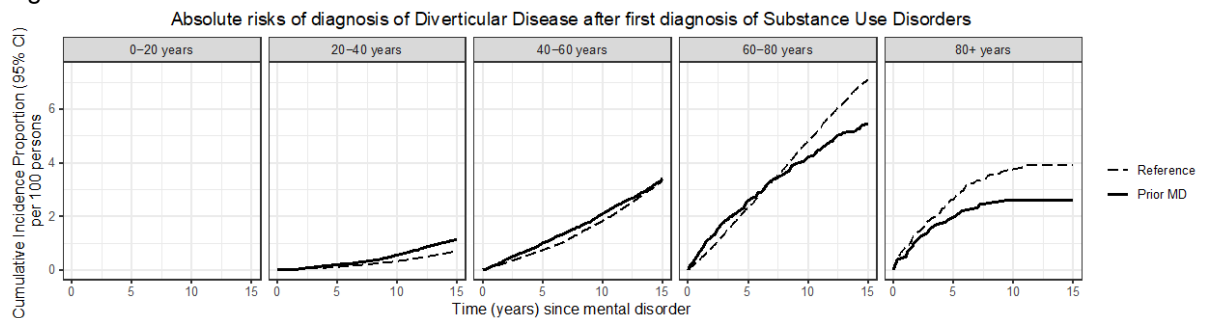

Figure S124.17 – Chronic Kidney Disease

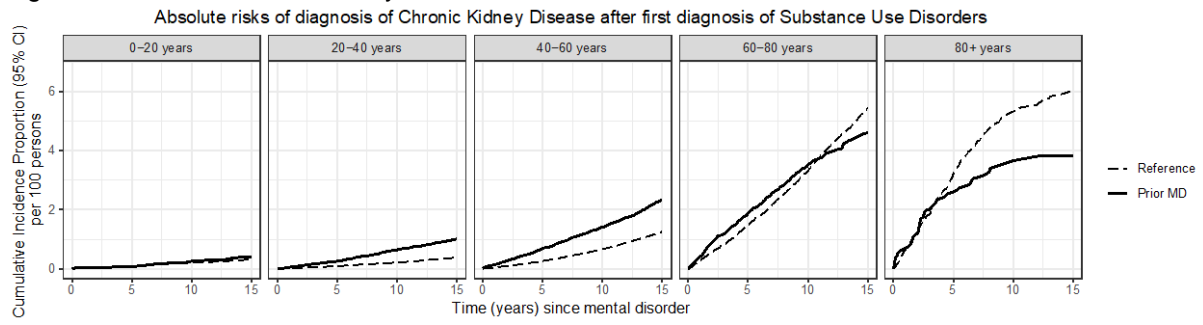

Figure S124.18 – Prostate Disorders

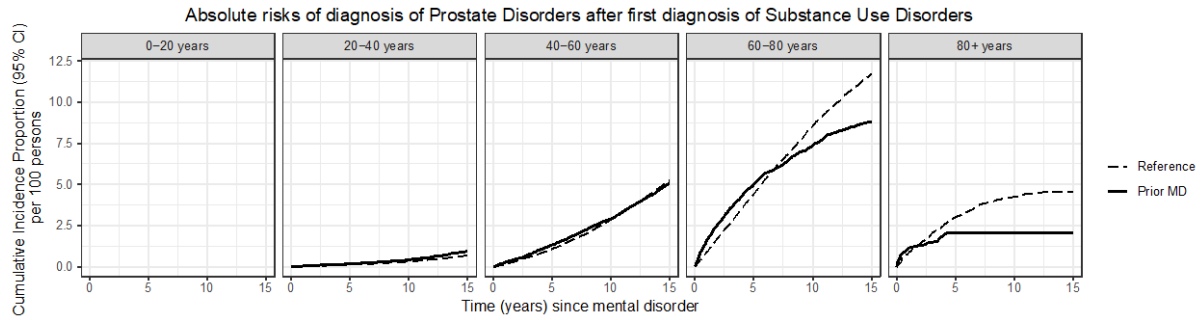

Figure S124.19 – Connective Tissue Disorders

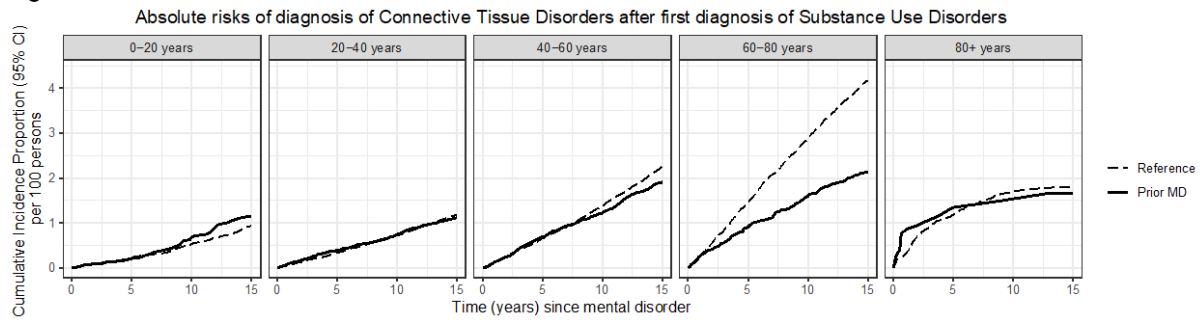

Figure S124.20 – Osteoporosis

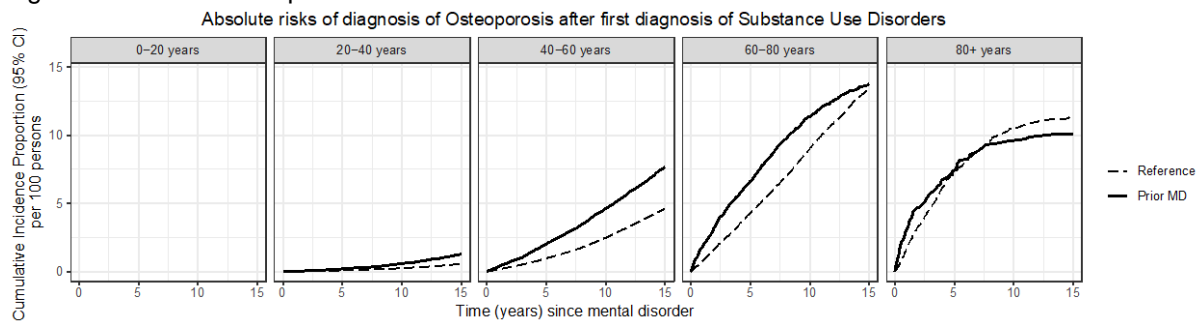

Figure S124.21 – Painful Conditions

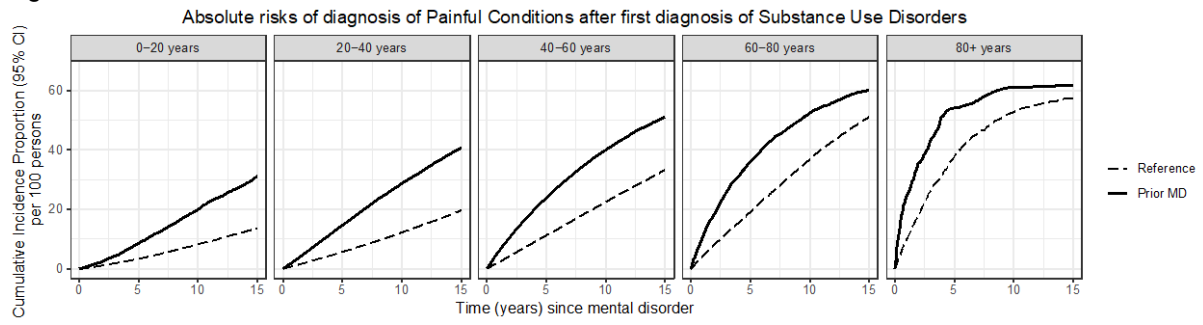

Figure S124.22 – HIV/AIDS

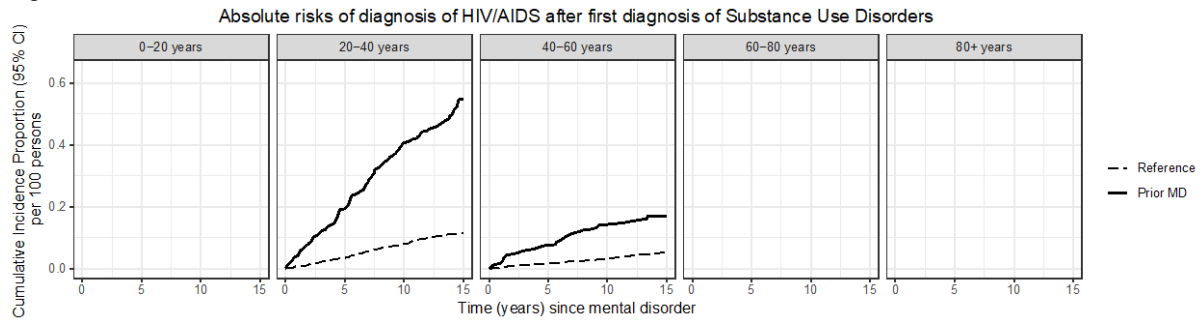

Figure S124.23 – Anemias

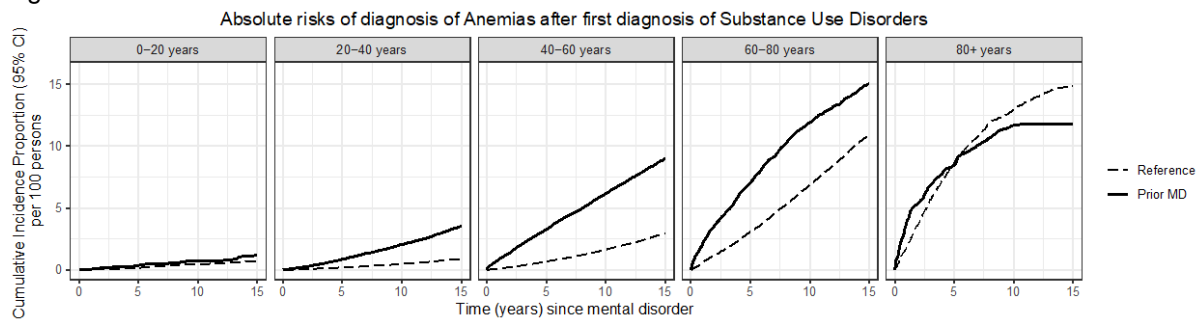

Figure S124.24 – Cancer

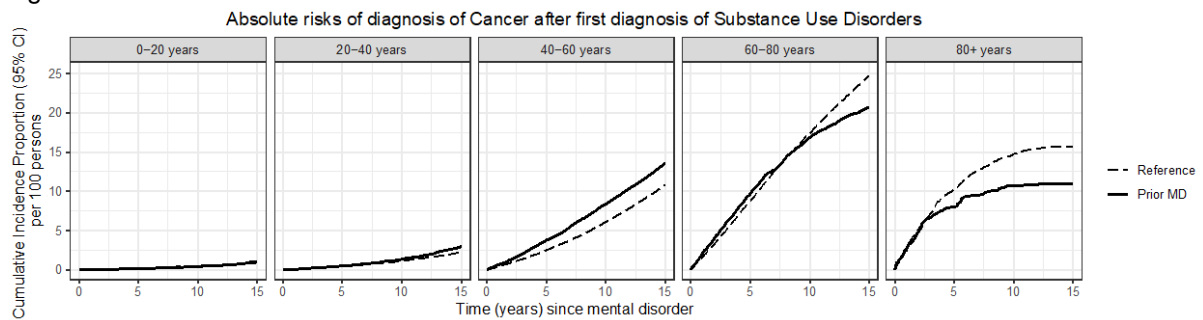

Figure S124.25 – Vision Problems

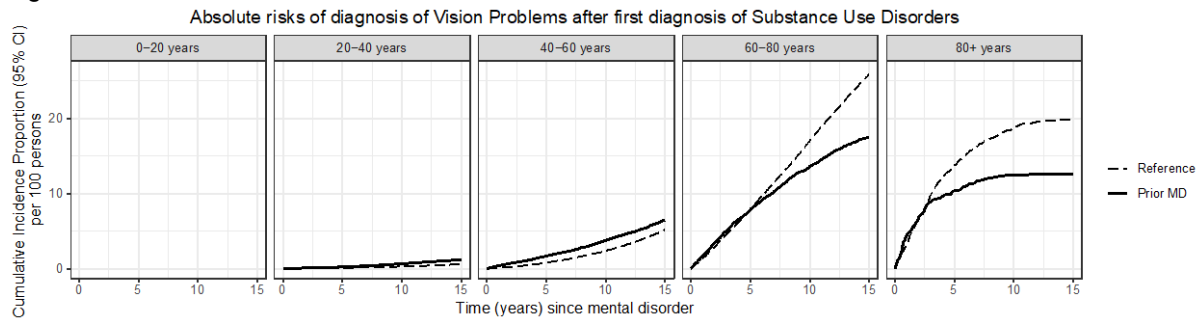

Figure S124.26 – Hearing Problems

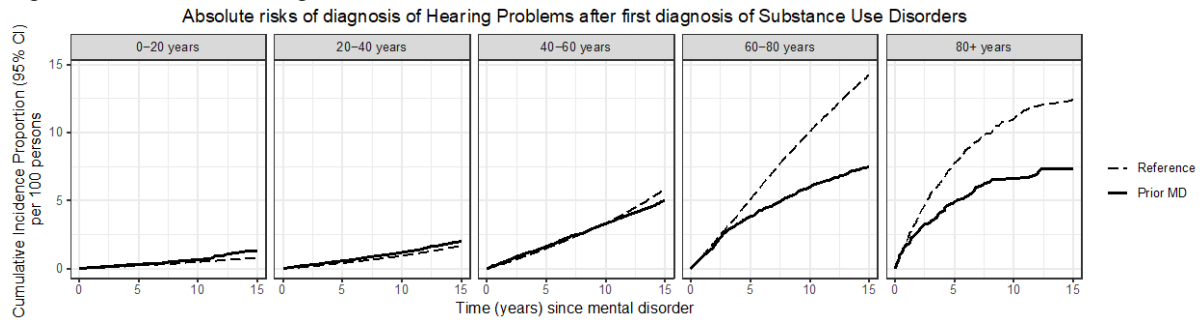

Figure S124.27 – Migraine

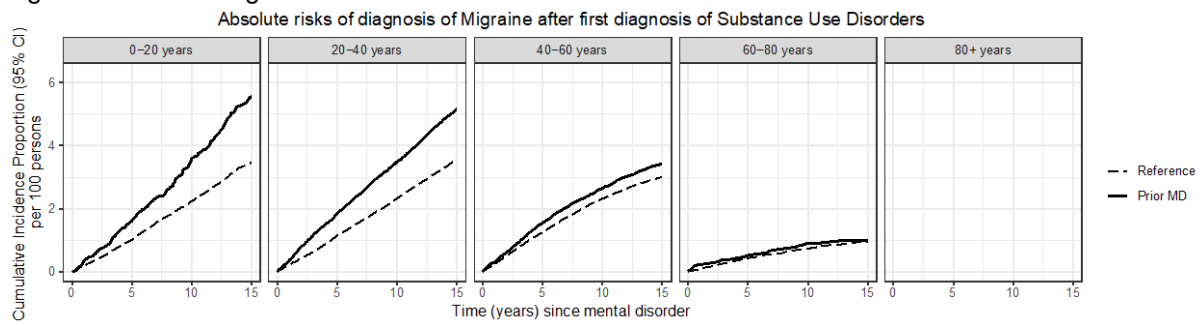

Figure S124.28 – Epilepsy

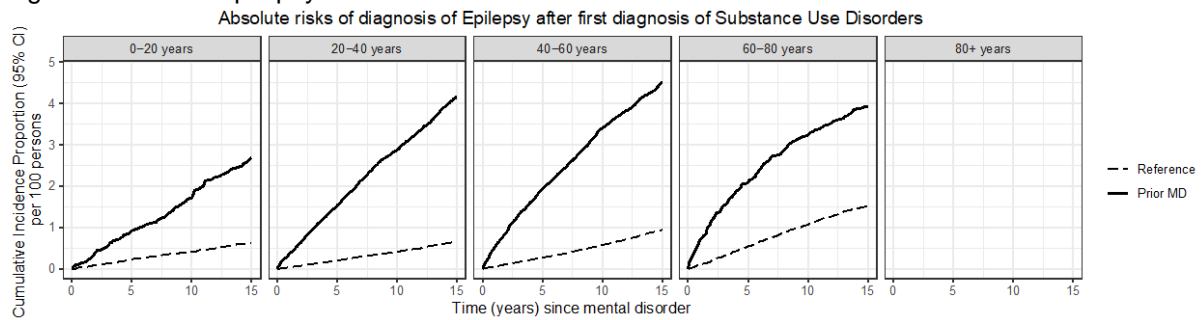

Figure S124.29 – Parkinson's Disease

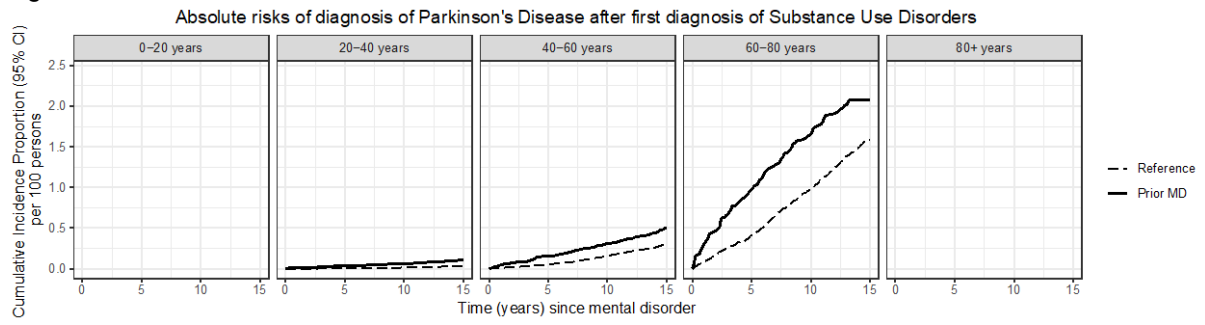

Figure S124.30 – Multiple Sclerosis

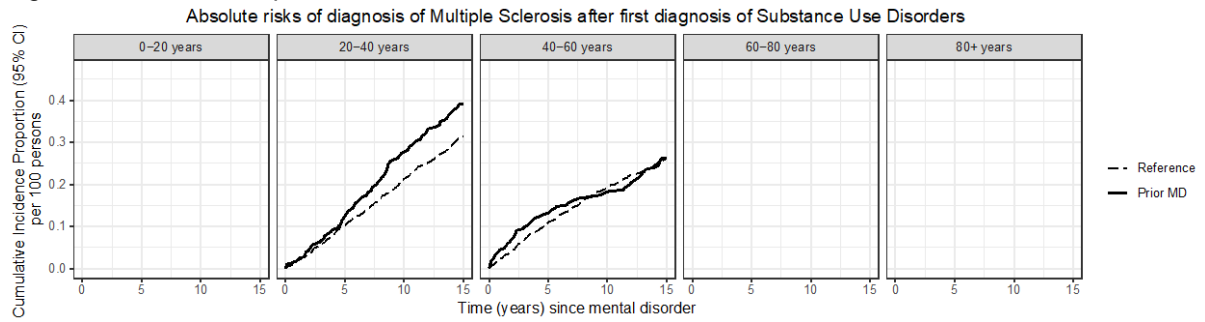

Figure S124.31 – Neuropathies

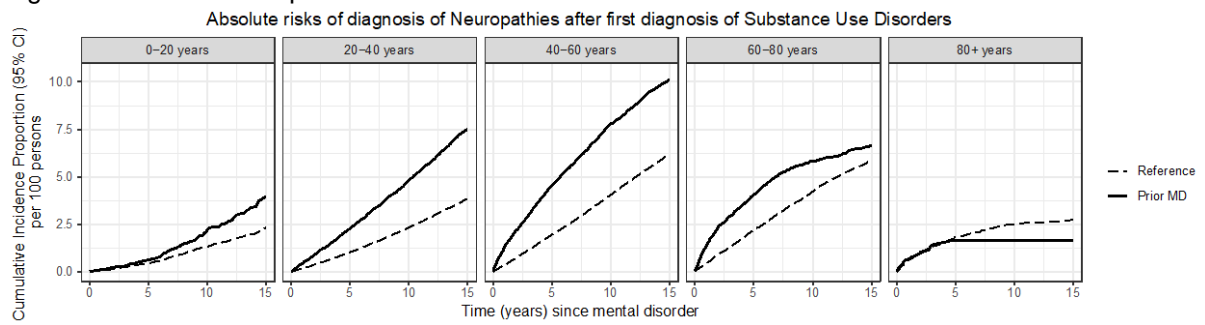



**Figures S125.1-S125.31. Absolute risks of being diagnosed with general medical conditions after a first diagnosis of Schizophrenia**

**Figure S125.1 – Hypertension**

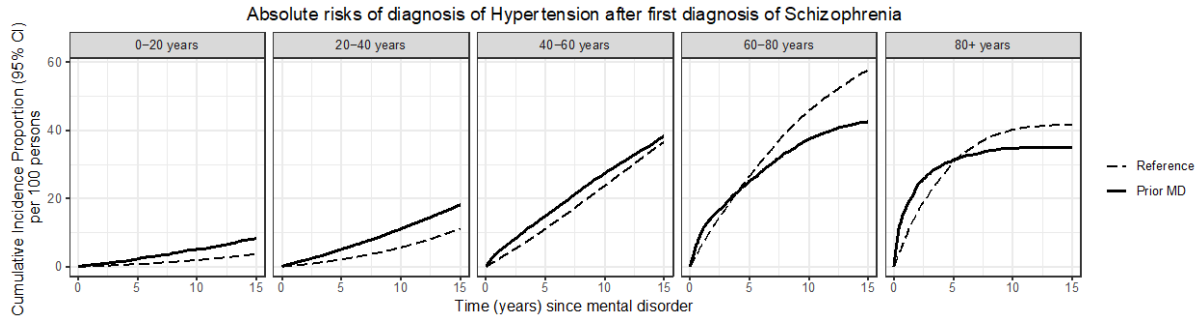

**Figure S125.2 – Dyslipidemia**

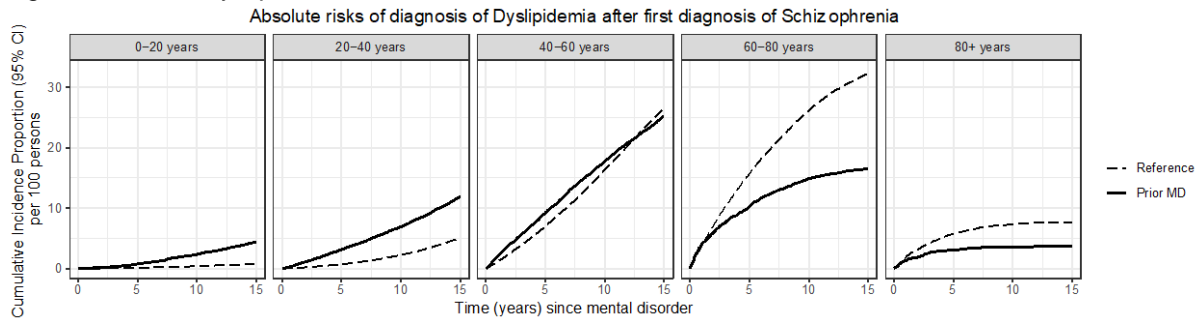

**Figure S125.3 – Ischemic Heart Disease**

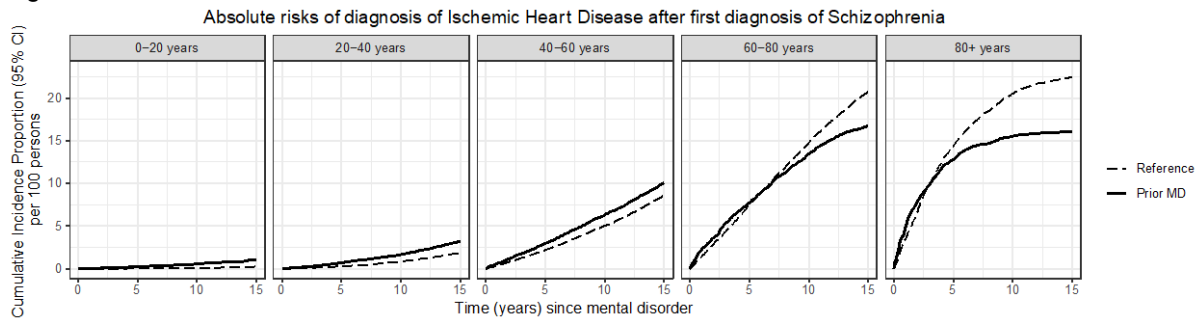

**Figure S125.4 – Atrial Fibrillation**

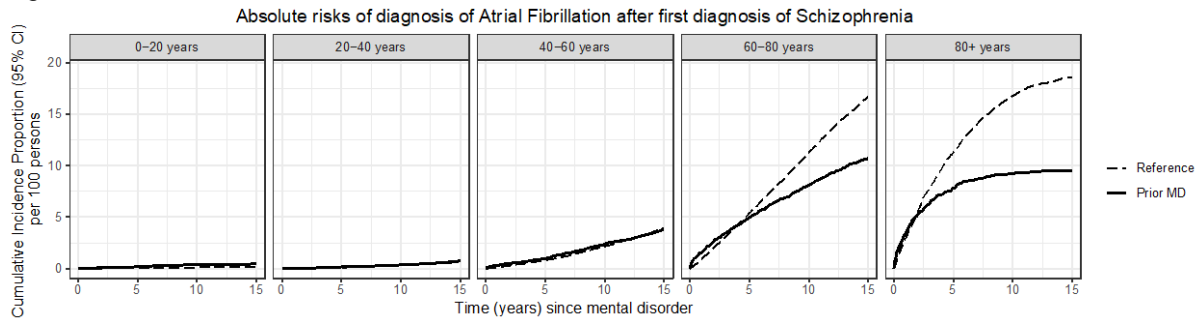

Figure S125.5 – Heart Failure

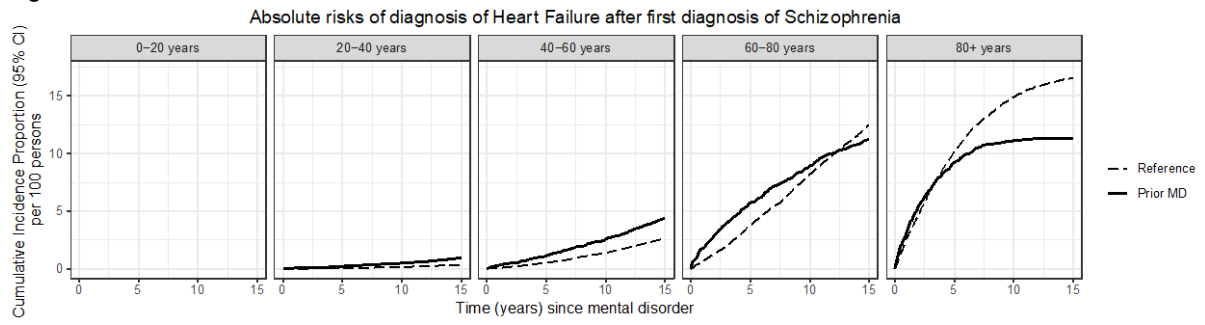

Figure S125.6 – Peripheral Artery Occlusive Disease

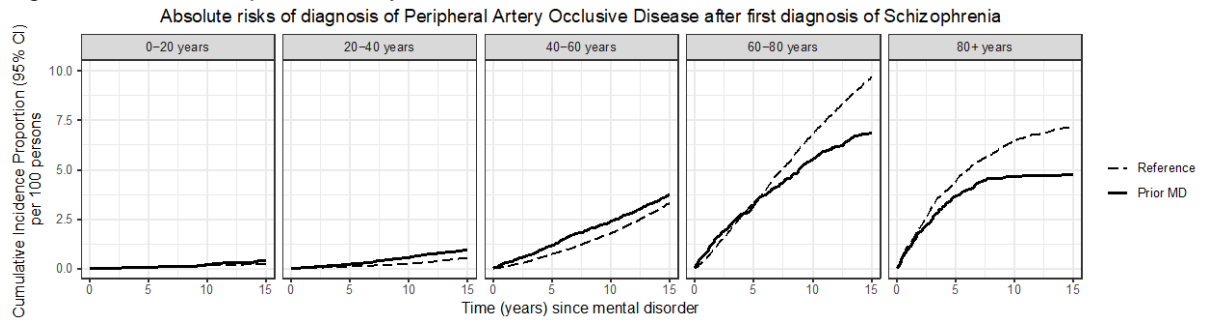

Figure S125.7 – Stroke

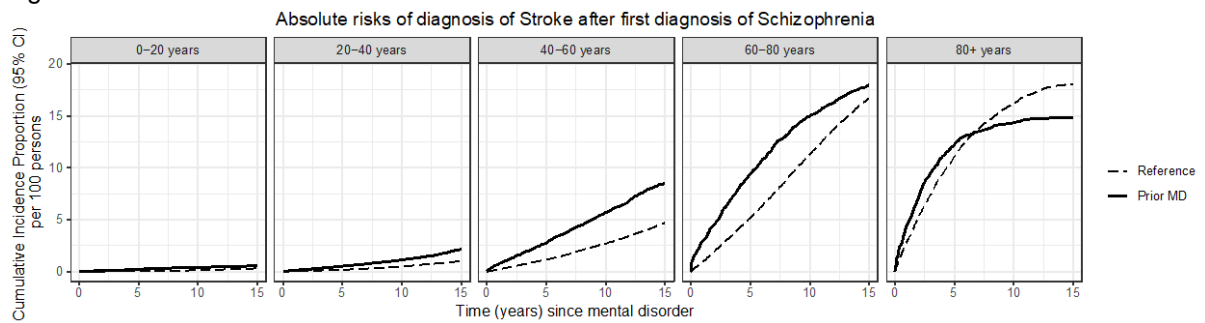

Figure S125.8 – Diabetes Mellitus

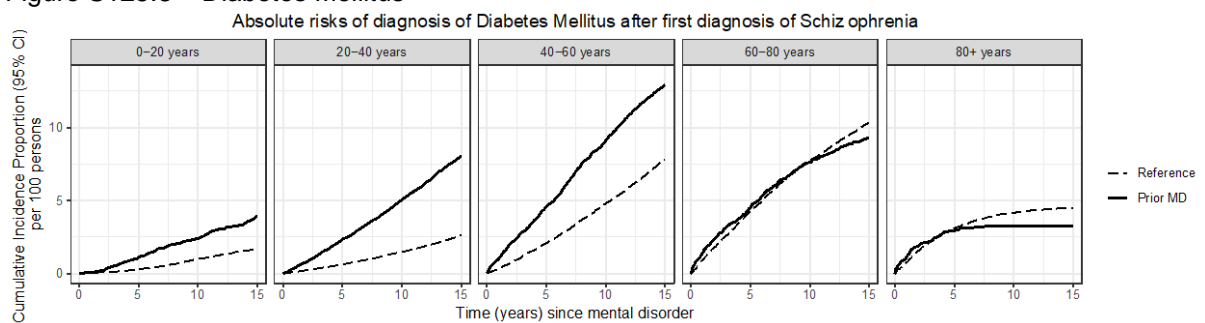

Figure S125.9 – Thyroid Disorders

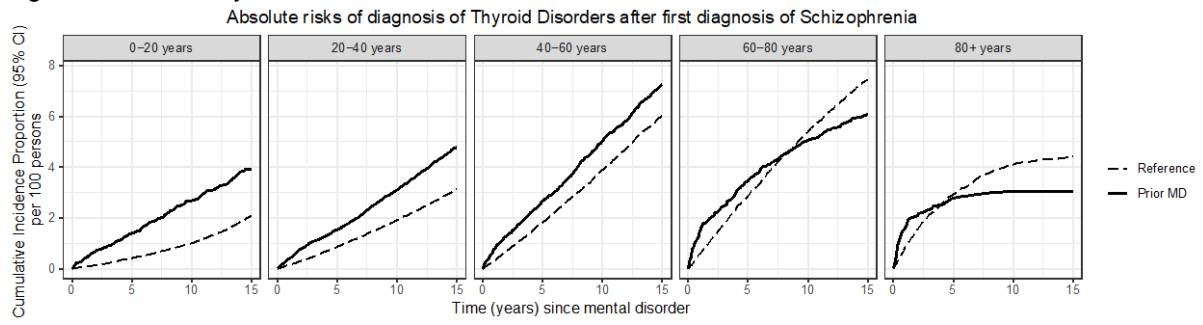

Figure S125.10 – Gout

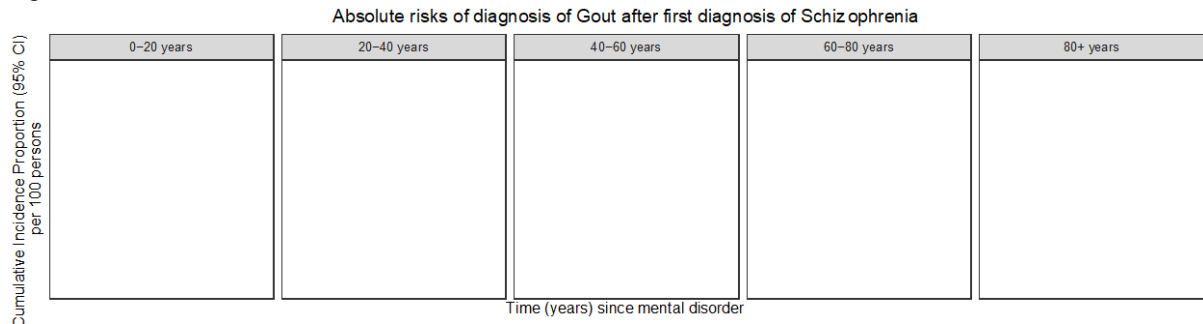

Figure S125.11 – Chronic Pulmonary Disease

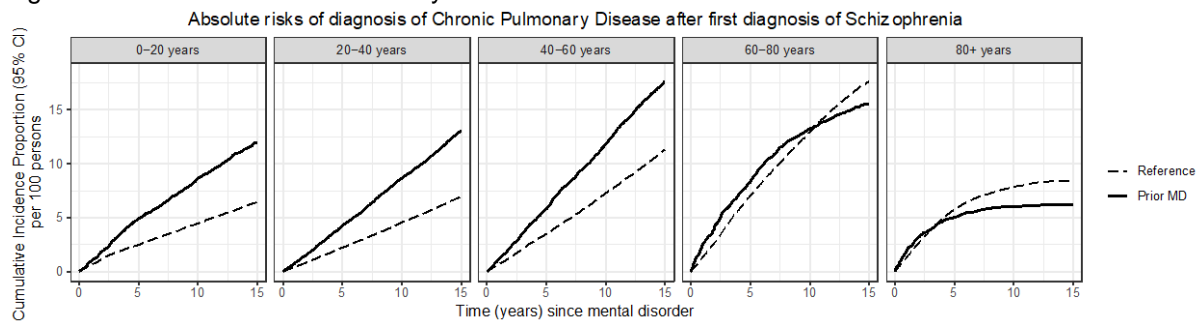

Figure S125.12 – Allergy

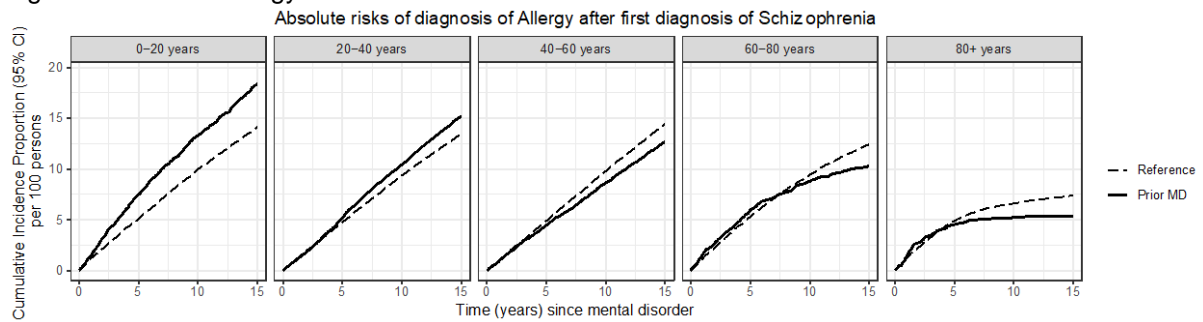

Figure S125.13 – Ulcer/Chronic Gastritis

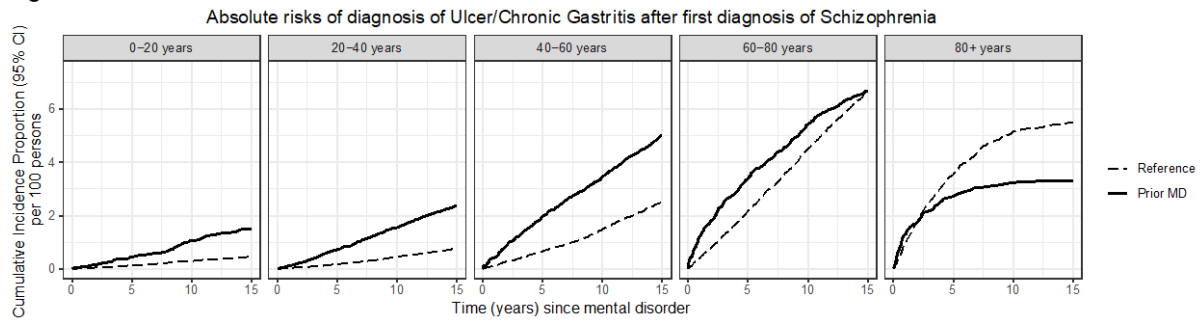

Figure S125.14 – Chronic Liver Disease

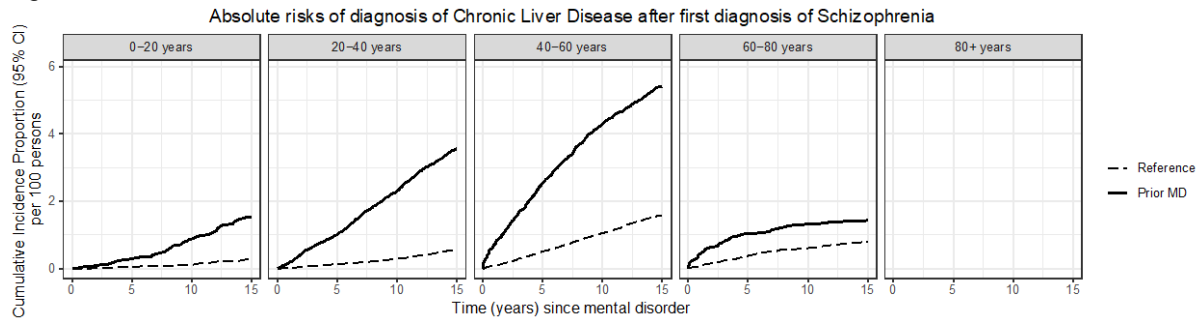

Figure S125.15 – Inflammatory Bowel Disease

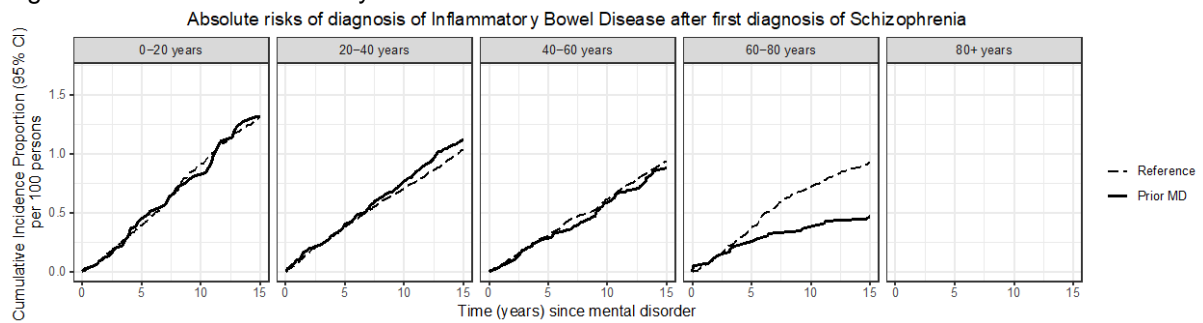

Figure S125.16 – Diverticular Disease of the Intestine

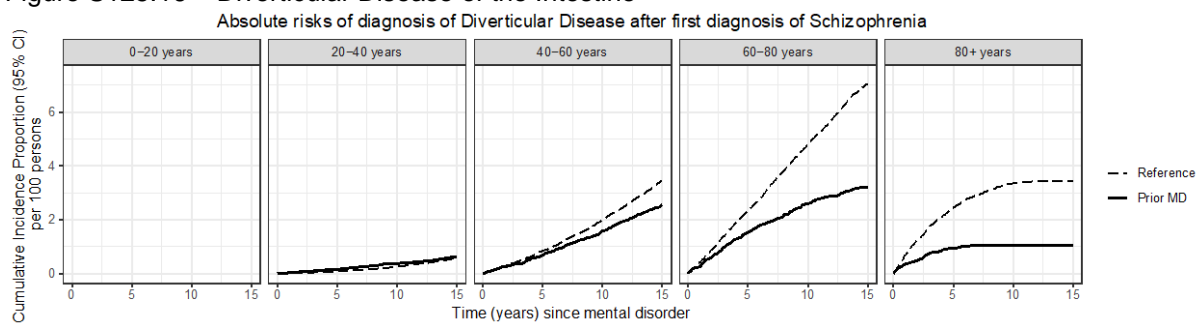

Figure S125.17 – Chronic Kidney Disease

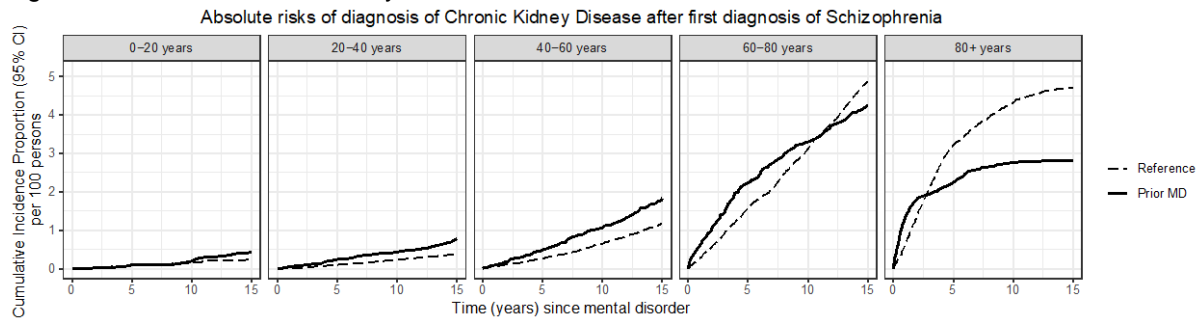

Figure S125.18 – Prostate Disorders

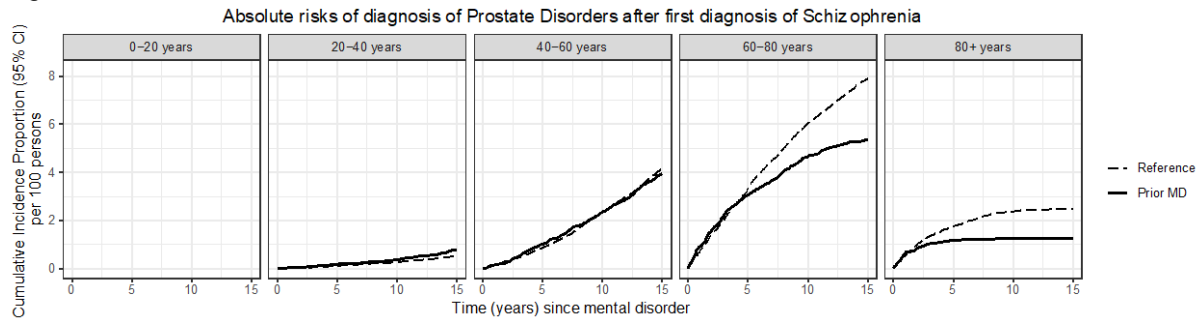

Figure S125.19 – Connective Tissue Disorders

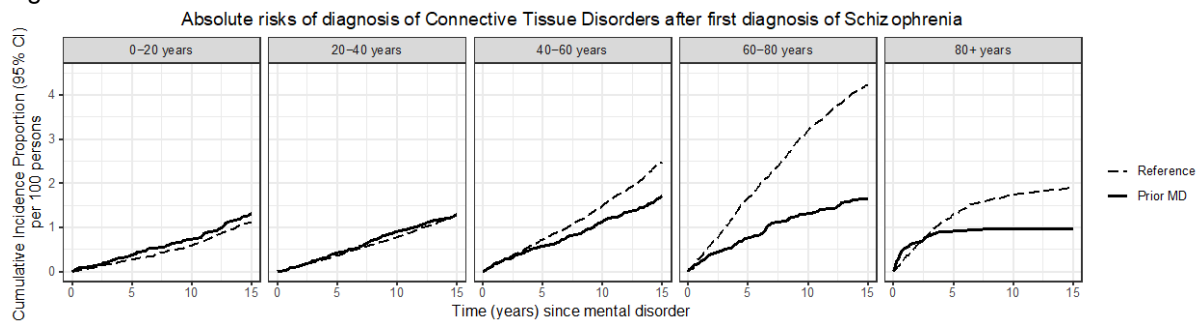

Figure S125.20 – Osteoporosis

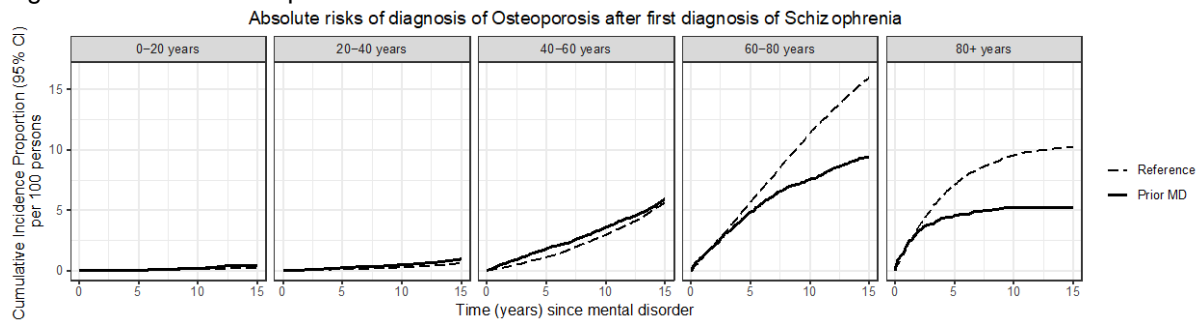

Figure S125.21 – Painful Conditions

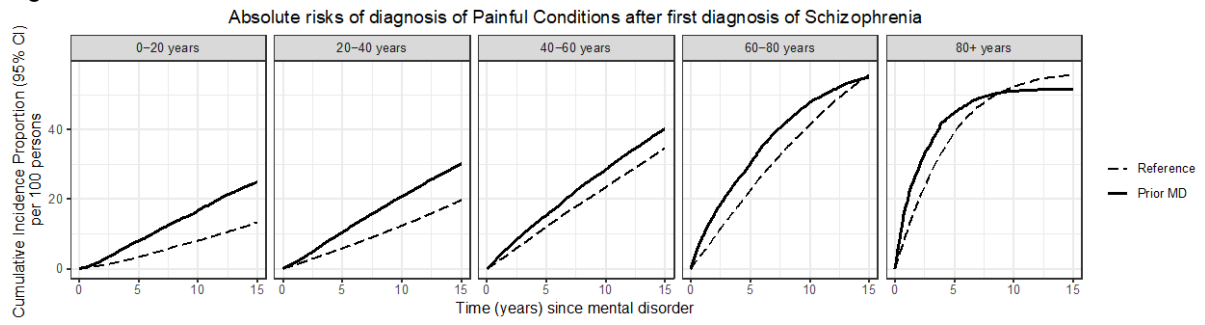

Figure S125.22 – HIV/AIDS

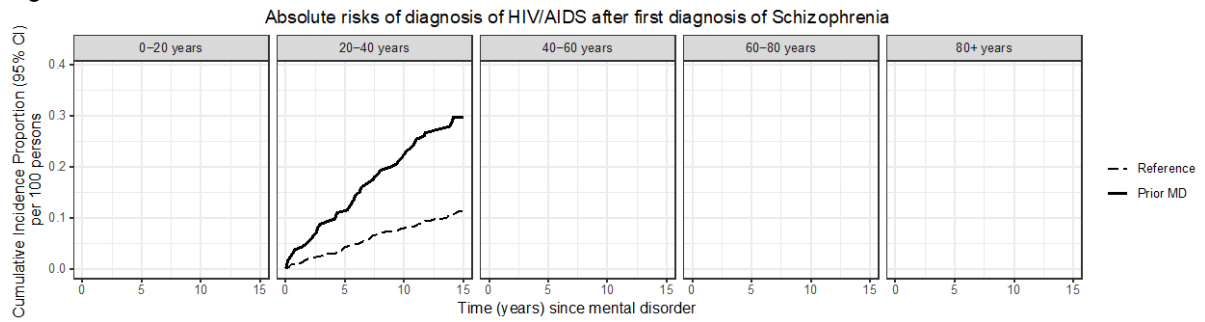

Figure S125.23 – Anemias

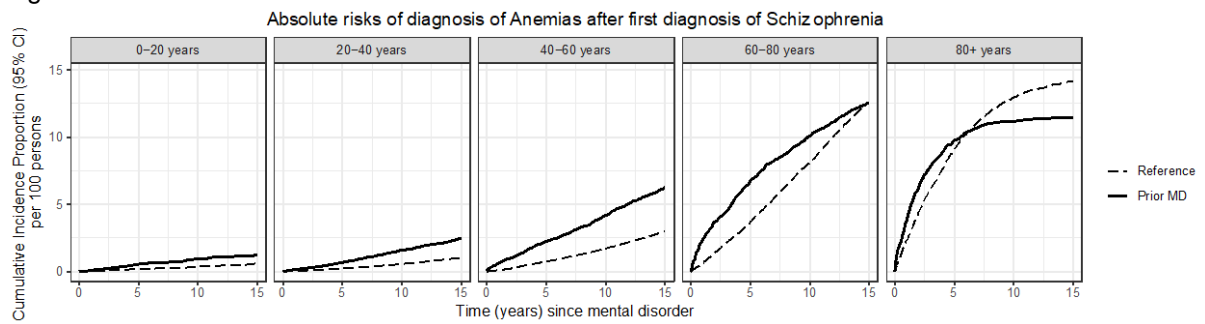

Figure S125.24 – Cancer

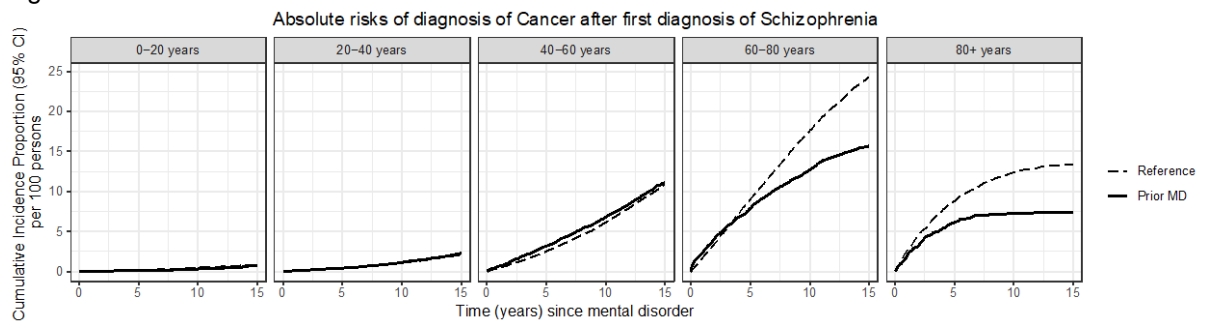

Figure S125.25 – Vision Problems

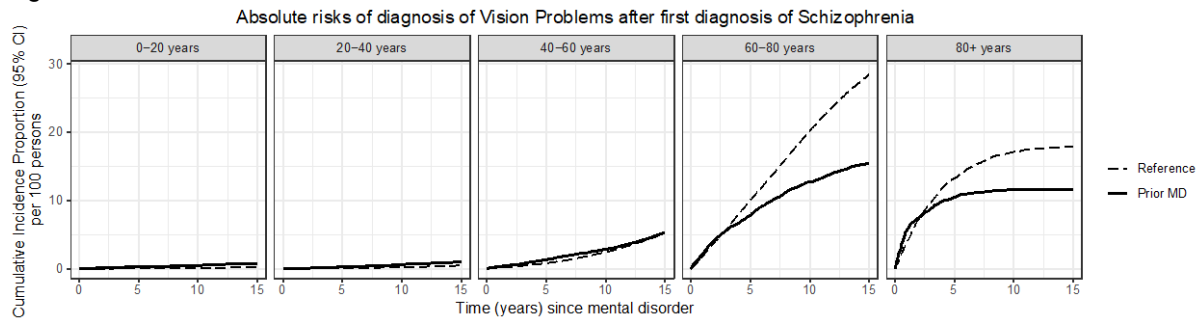

Figure S125.26 – Hearing Problems

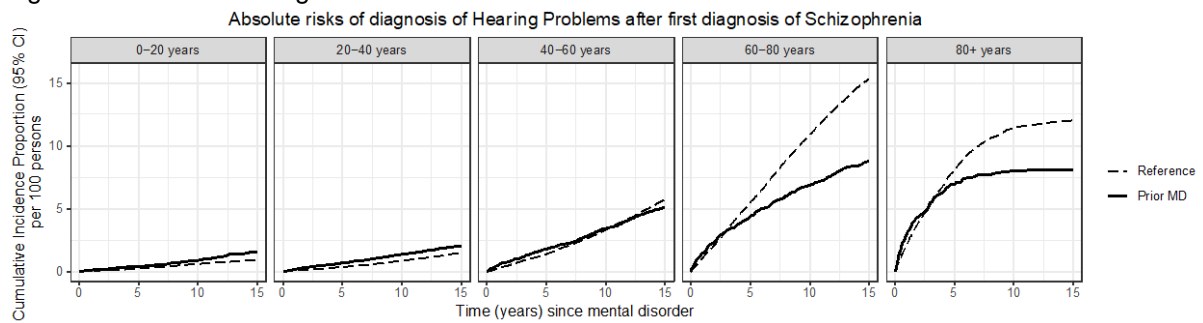

Figure S125.27 – Migraine

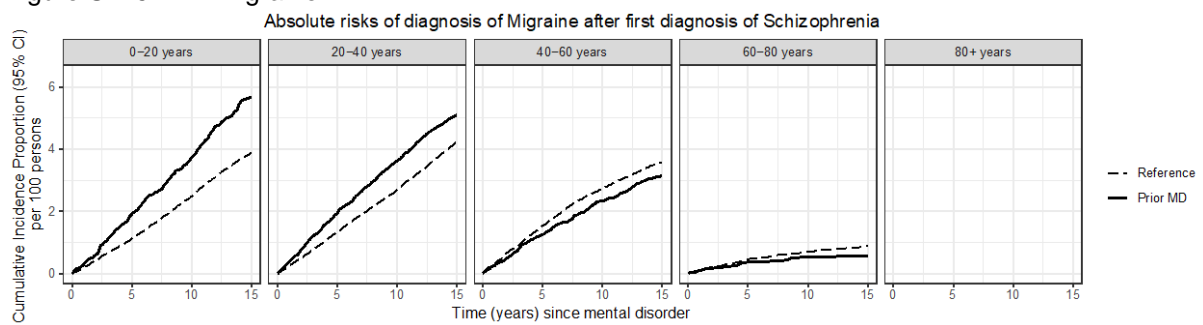

Figure S125.28 – Epilepsy

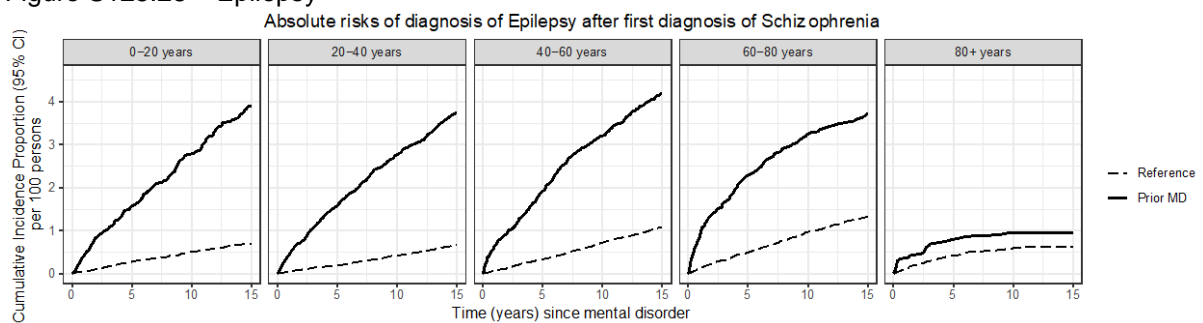

Figure S125.29 – Parkinson's Disease

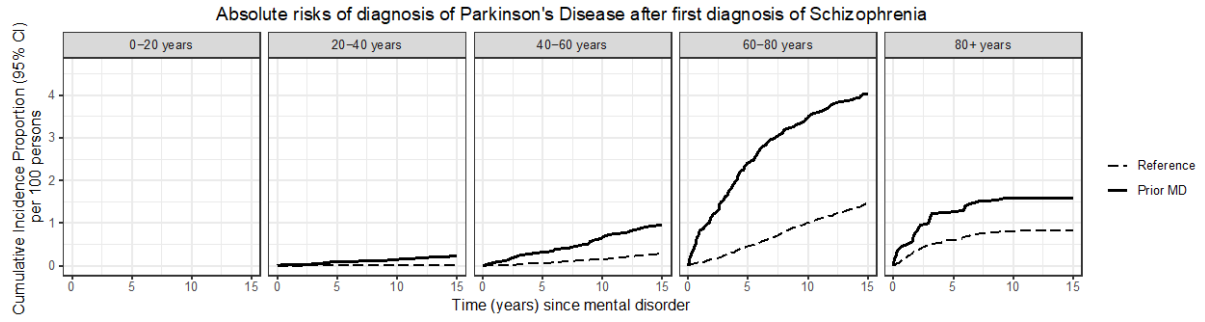

Figure S125.30 – Multiple Sclerosis

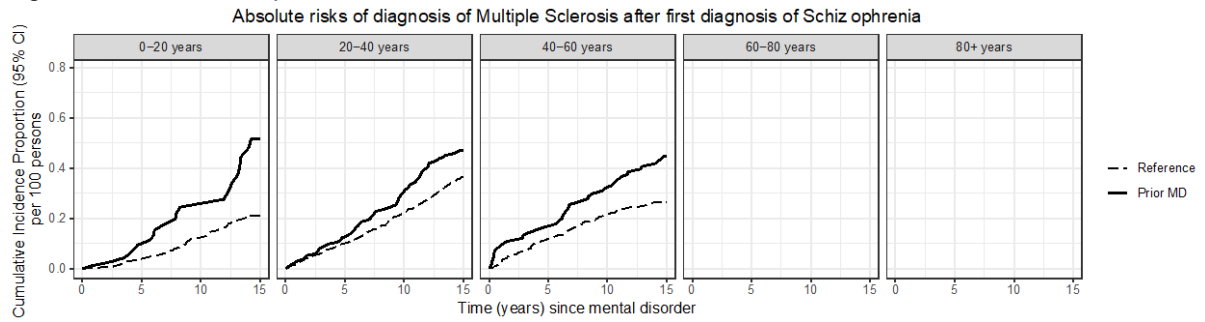

Figure S125.31 – Neuropathies

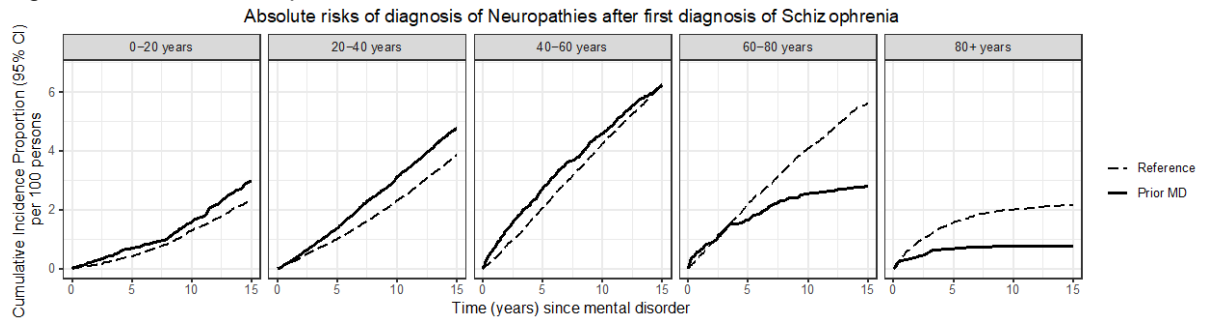



**Figures S126.1-S126.31. Absolute risks of being diagnosed with general medical conditions after a first diagnosis of Mood Disorders**

**Figure S126.1 – Hypertension**

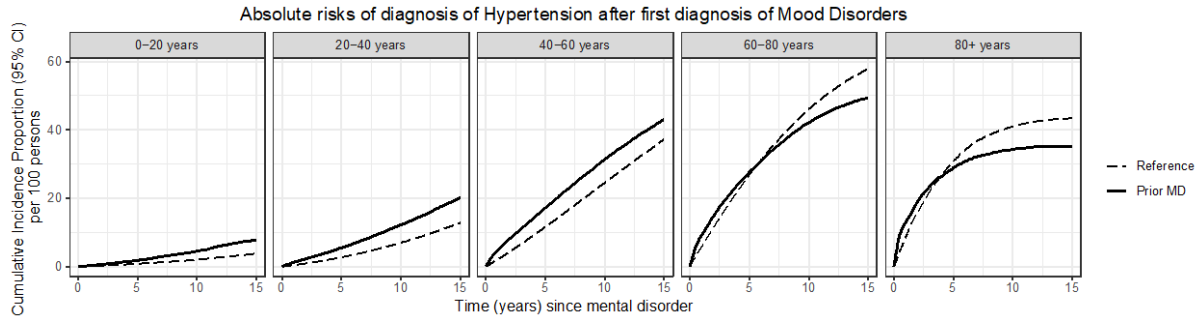

**Figure S126.2 – Dyslipidemia**

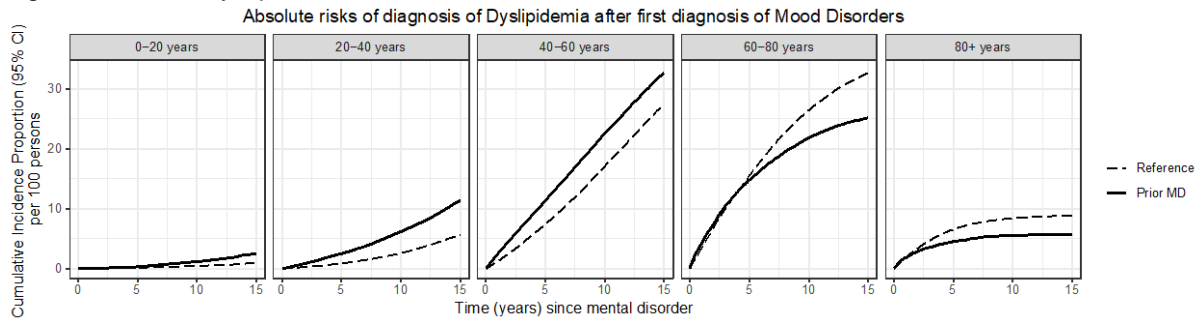

**Figure S126.3 – Ischemic Heart Disease**

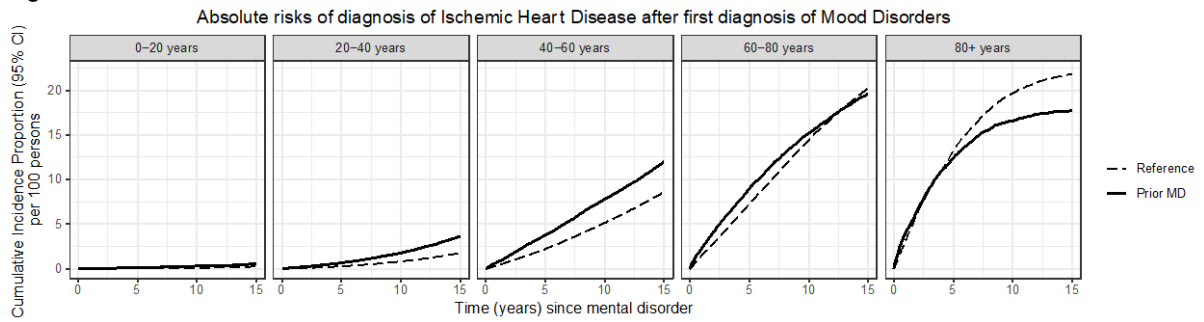

**Figure S126.4 – Atrial Fibrillation**

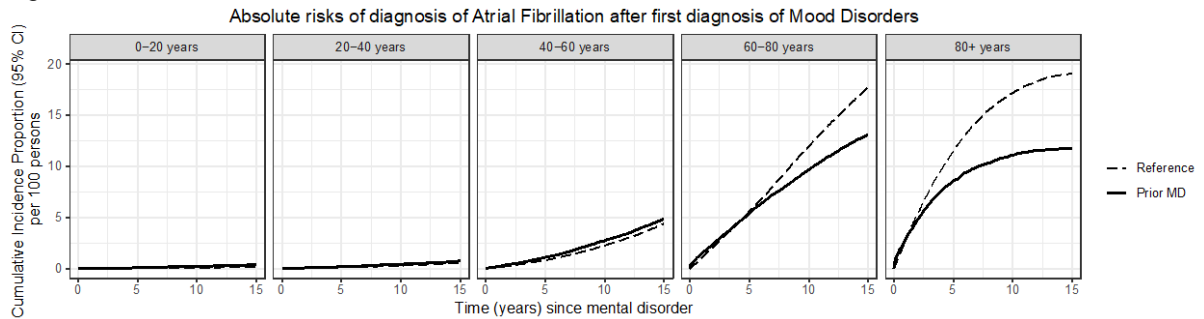

Figure S126.5 – Heart Failure

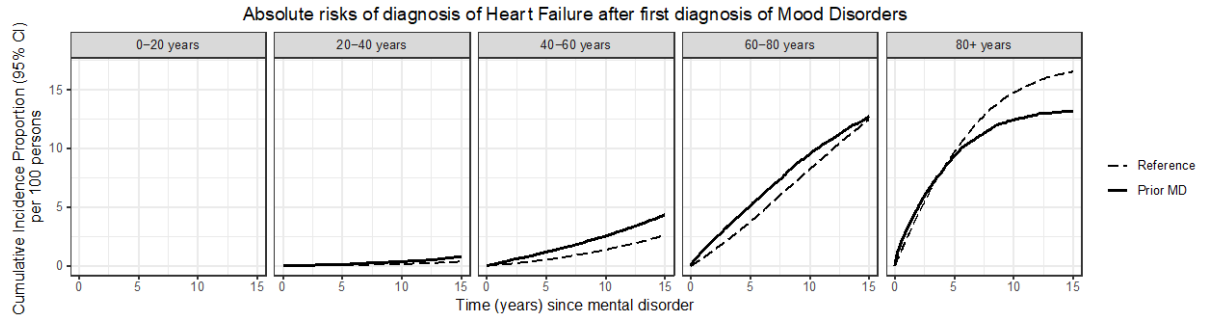

Figure S126.6 – Peripheral Artery Occlusive Disease

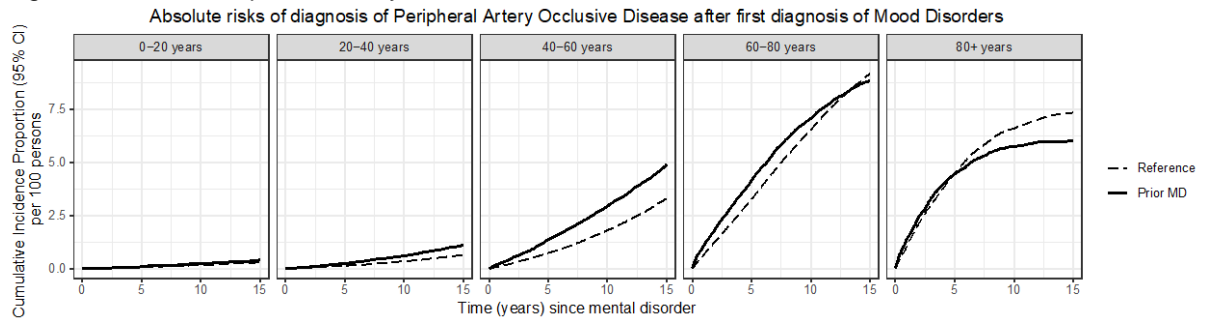

Figure S126.7 – Stroke

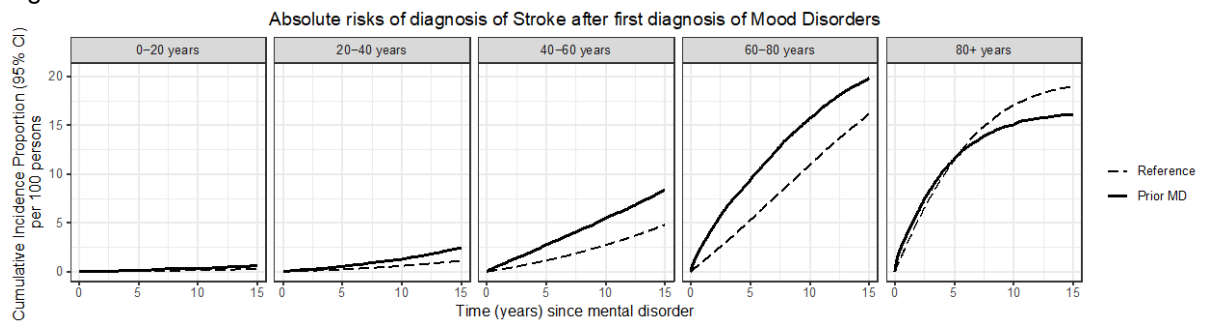

Figure S126.8 – Diabetes Mellitus

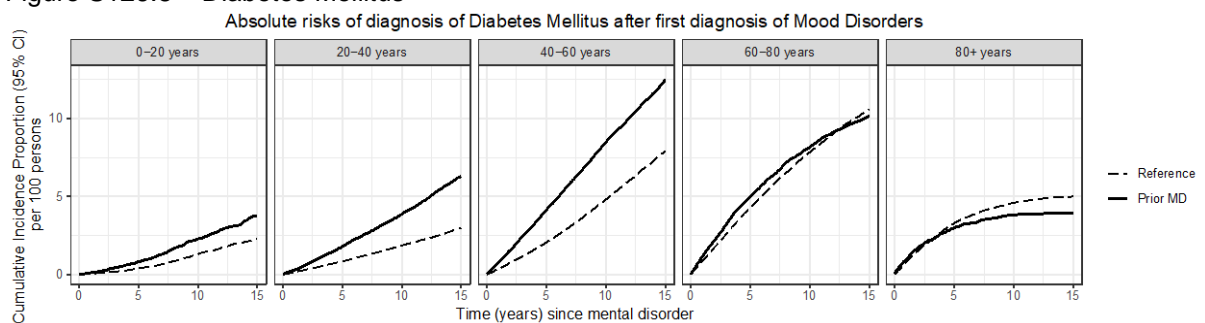

Figure S126.9 – Thyroid Disorders

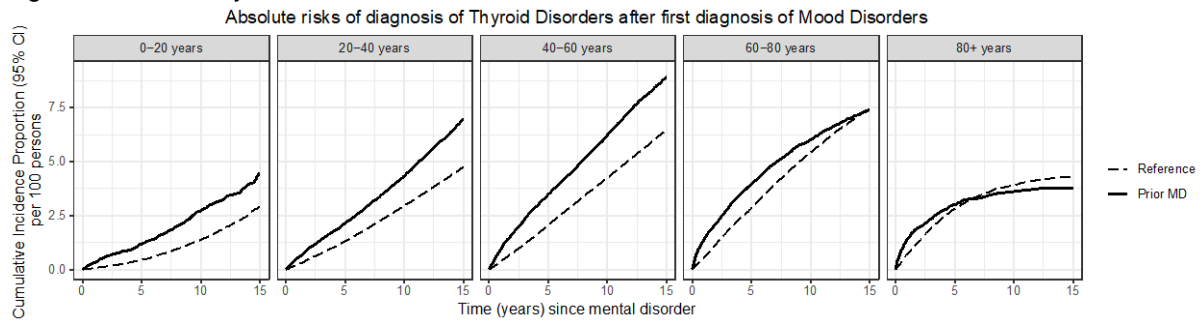

Figure S126.10 – Gout

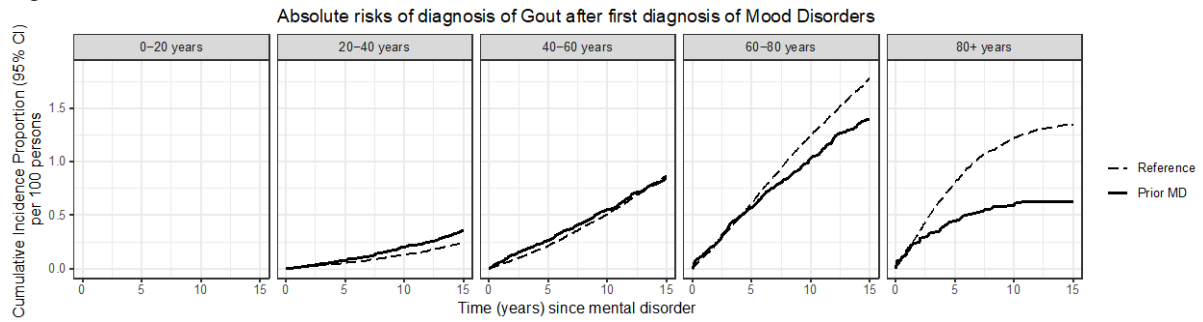

Figure S126.11 – Chronic Pulmonary Disease

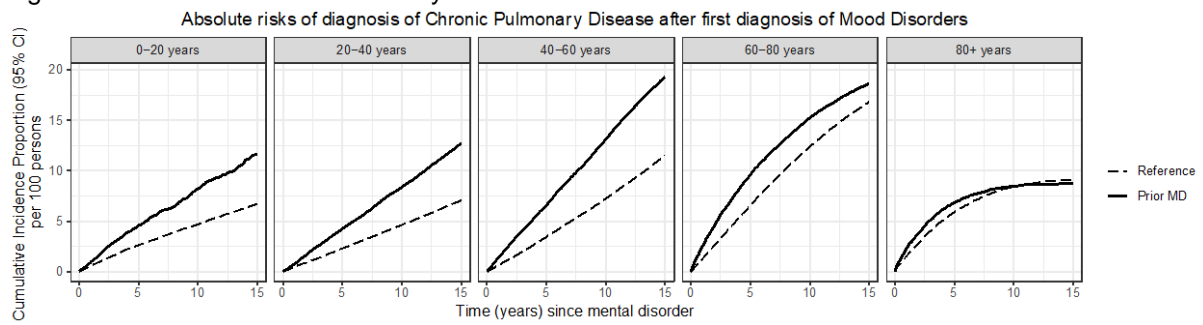

Figure S126.12 – Allergy

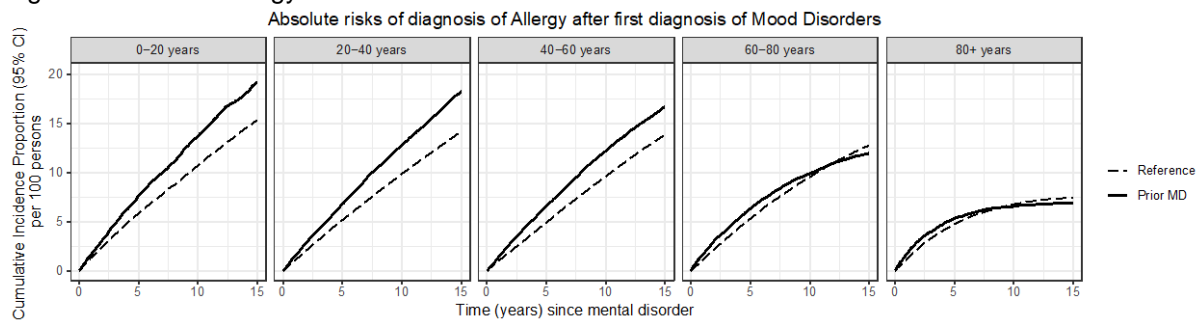

Figure S126.13 – Ulcer/Chronic Gastritis

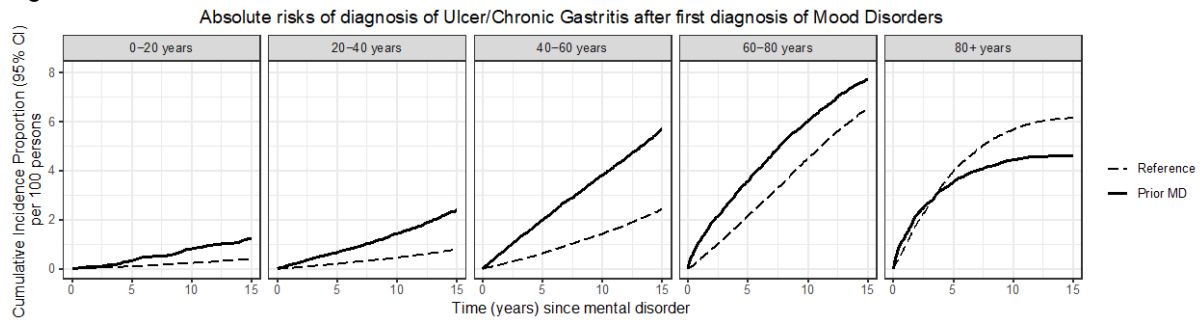

Figure S126.14 – Chronic Liver Disease

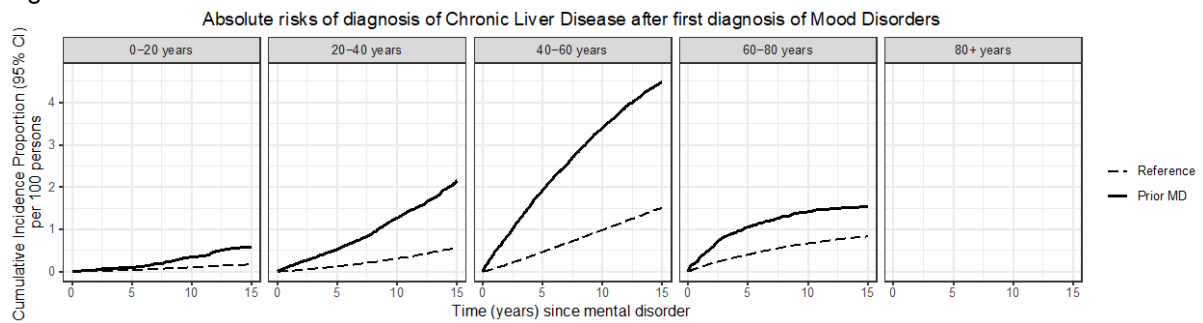

Figure S126.15 – Inflammatory Bowel Disease

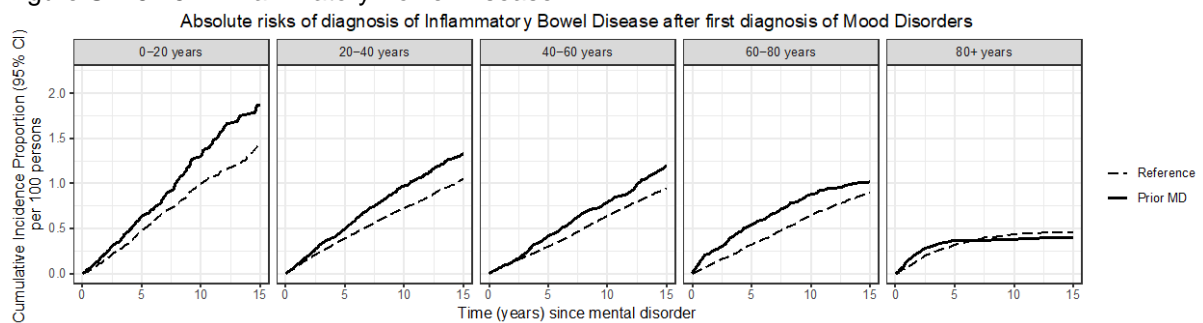

Figure S126.16 – Diverticular Disease of the Intestine

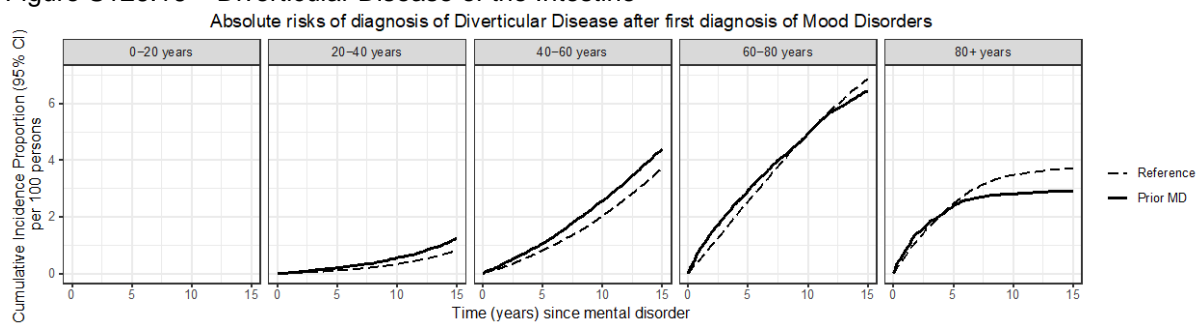

Figure S126.17 – Chronic Kidney Disease

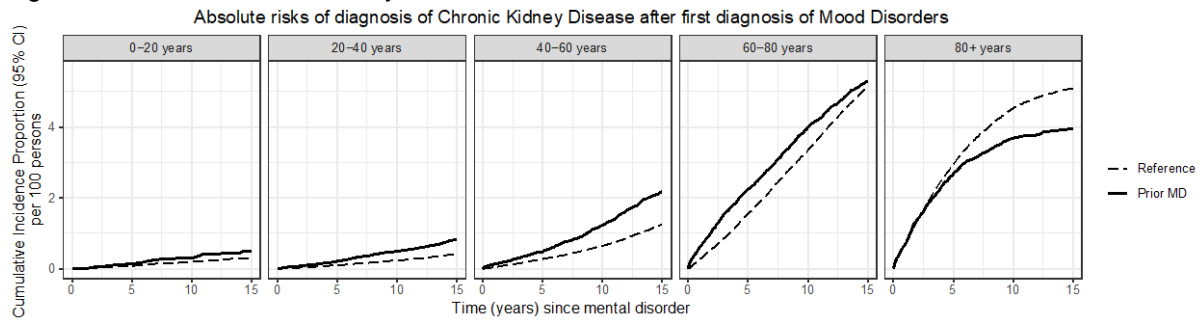

Figure S126.18 – Prostate Disorders

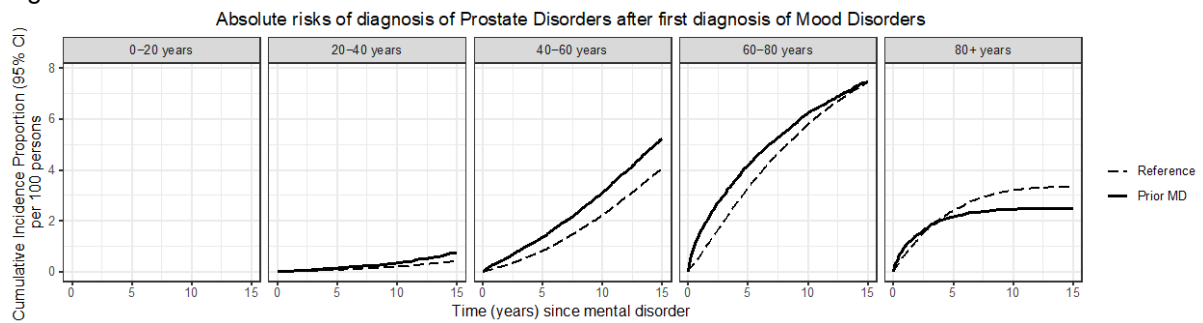

Figure S126.19 – Connective Tissue Disorders

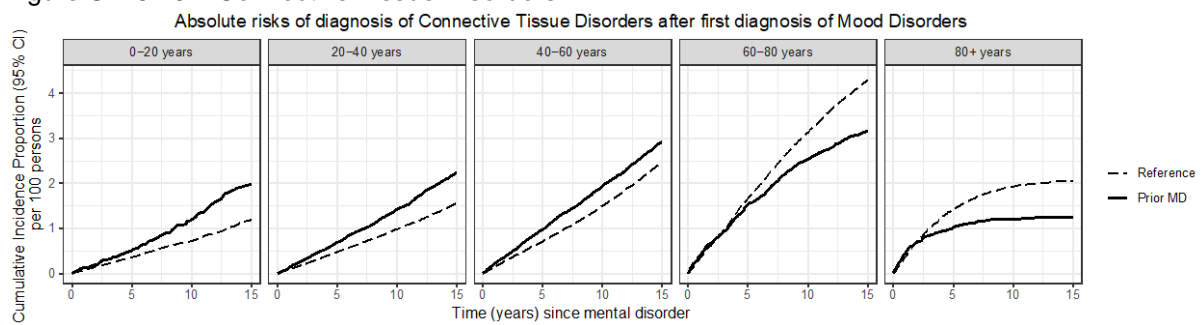

Figure S126.20 – Osteoporosis

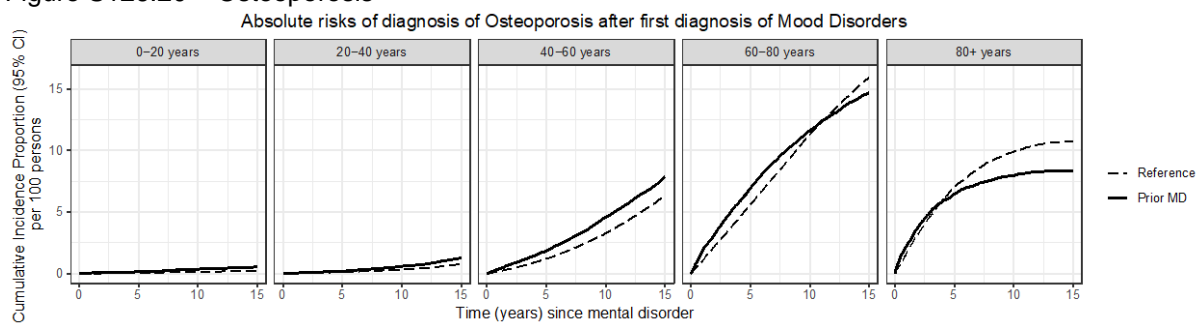

Figure S126.21 – Painful Conditions

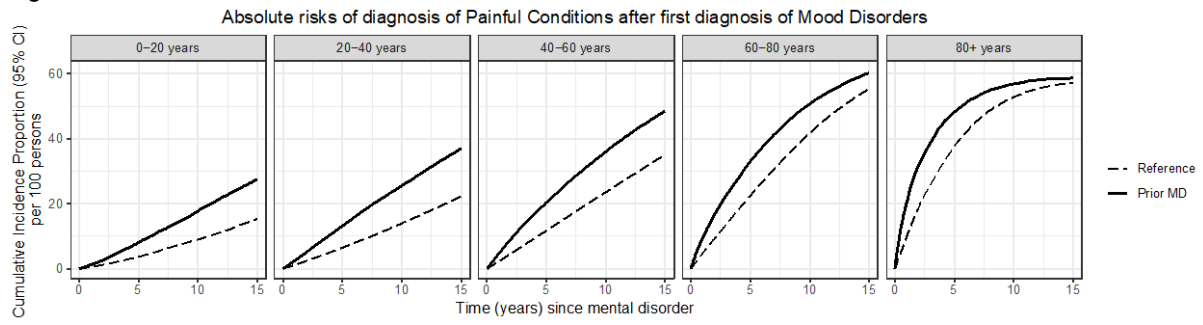

Figure S126.22 – HIV/AIDS

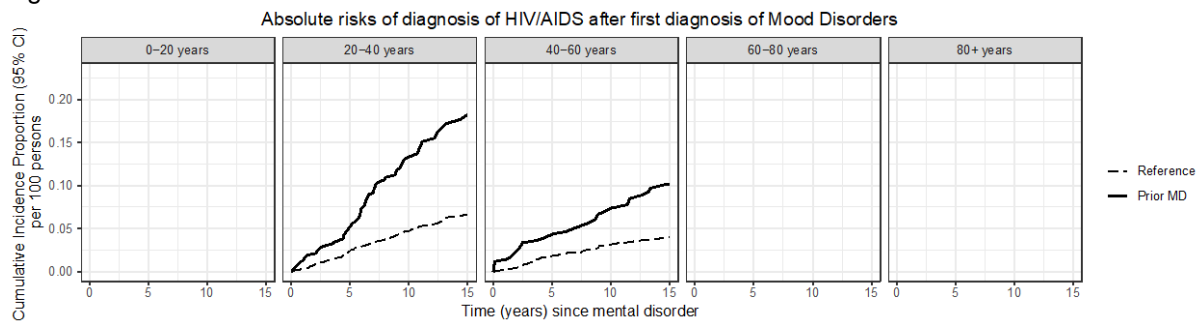

Figure S126.23 – Anemias

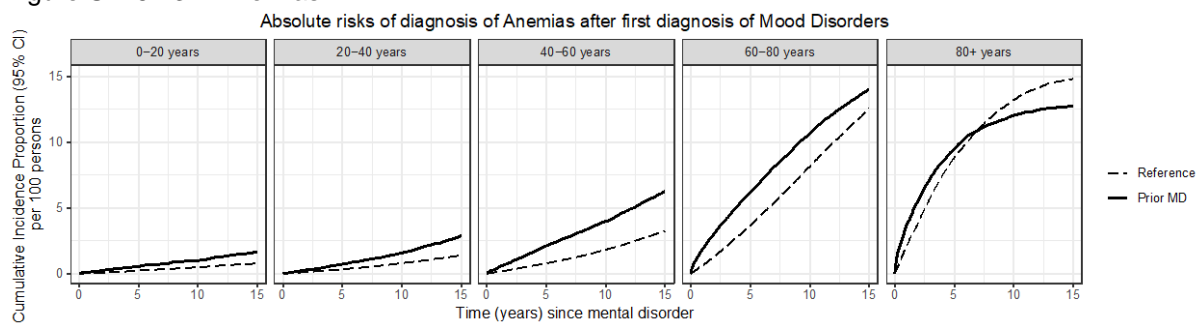

Figure S126.24 – Cancer

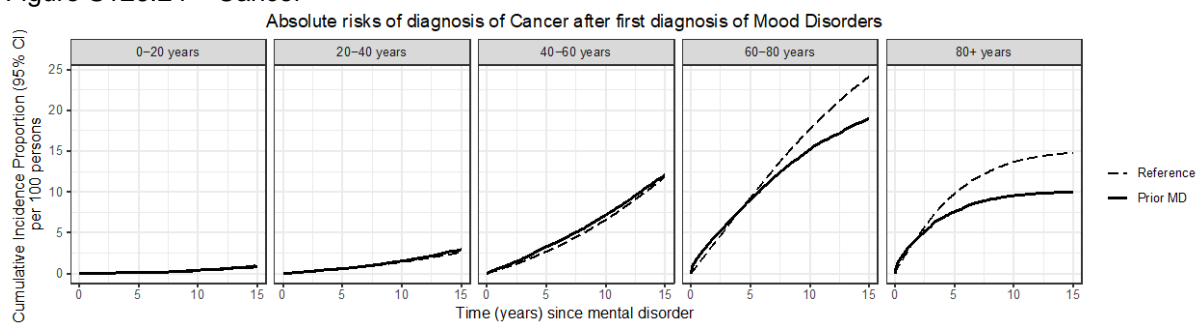

Figure S126.25 – Vision Problems

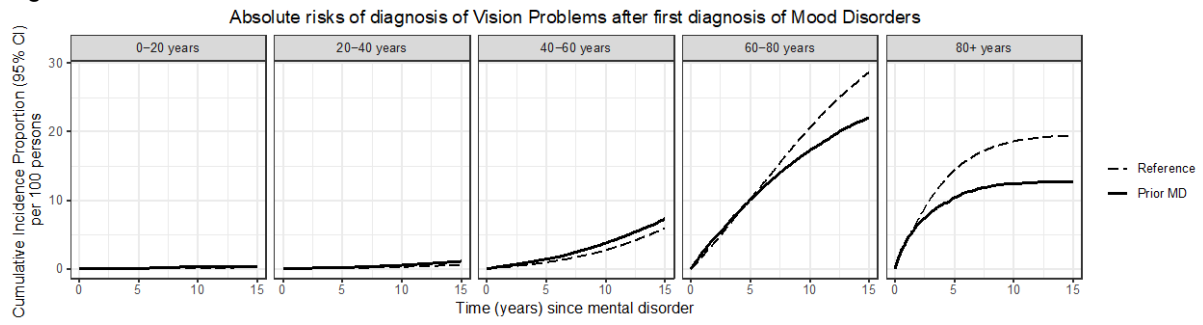

Figure S126.26 – Hearing Problems

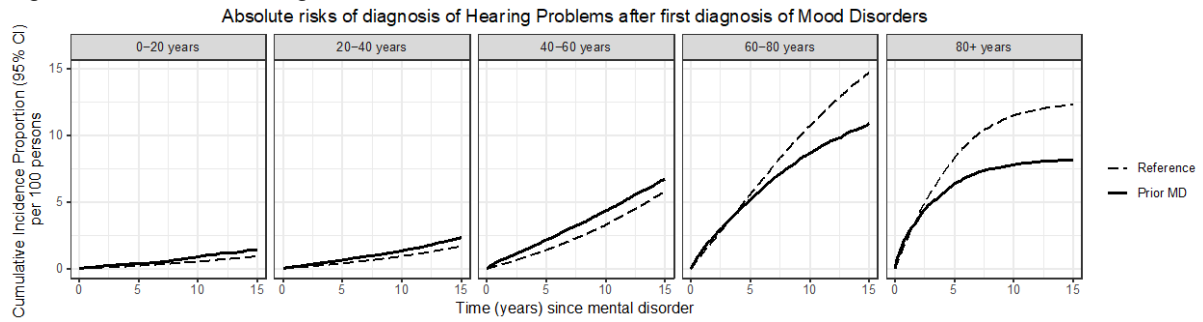

Figure S126.27 – Migraine

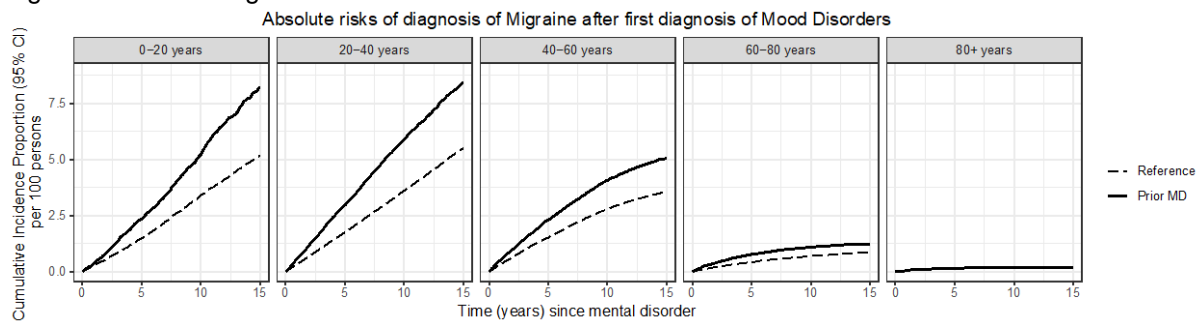

Figure S126.28 – Epilepsy

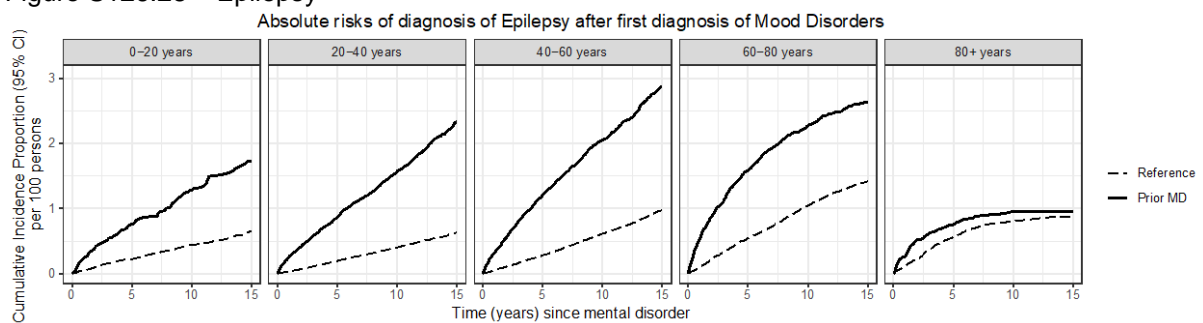

Figure S126.29 – Parkinson's Disease

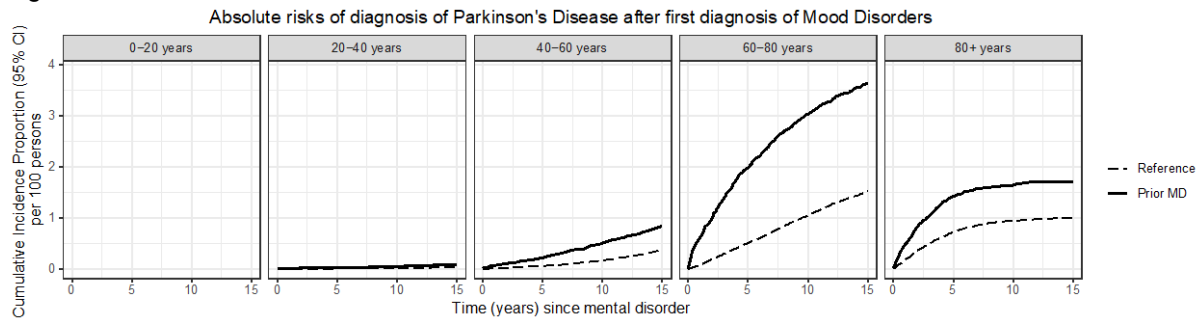

Figure S126.30 – Multiple Sclerosis

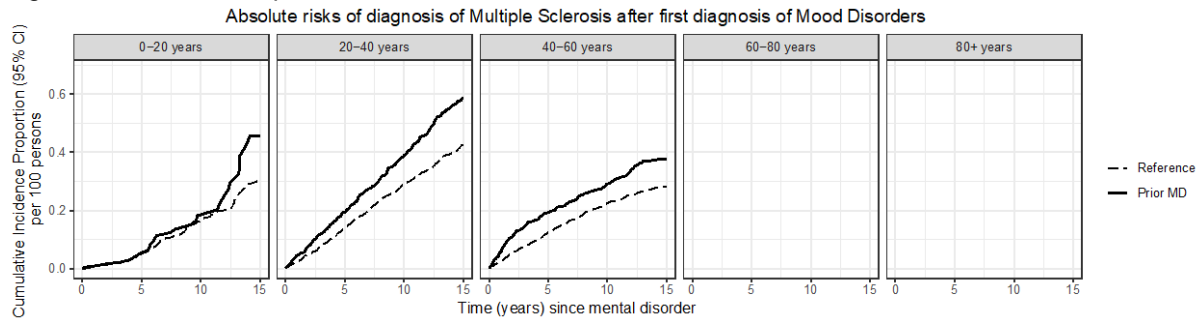

Figure S126.31 – Neuropathies

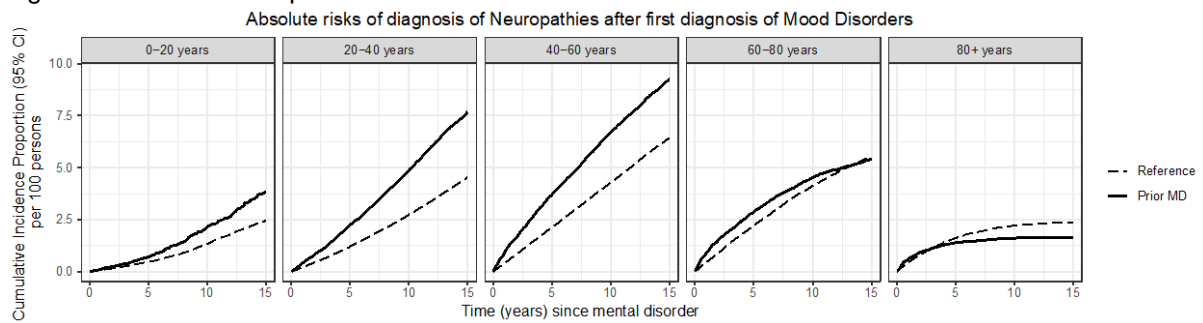



**Figures S127.1-S127.31. Absolute risks of being diagnosed with general medical conditions after a first diagnosis of Neurotic Disorders**

**Figure S127.1 – Hypertension**

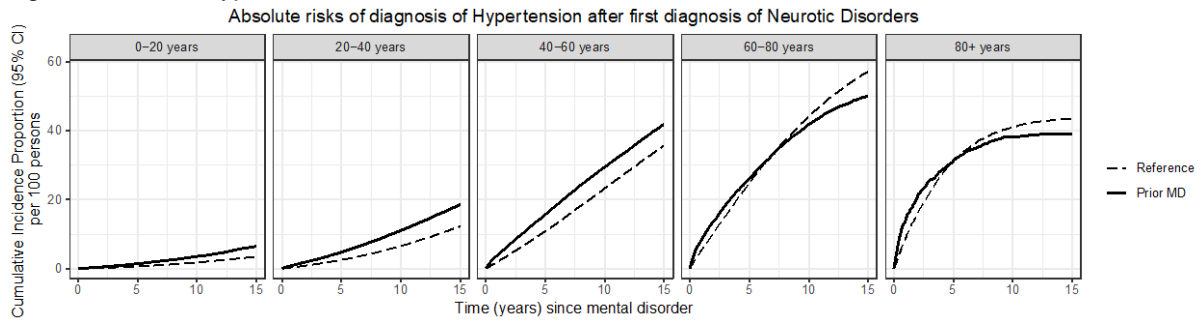

**Figure S127.2 – Dyslipidemia**

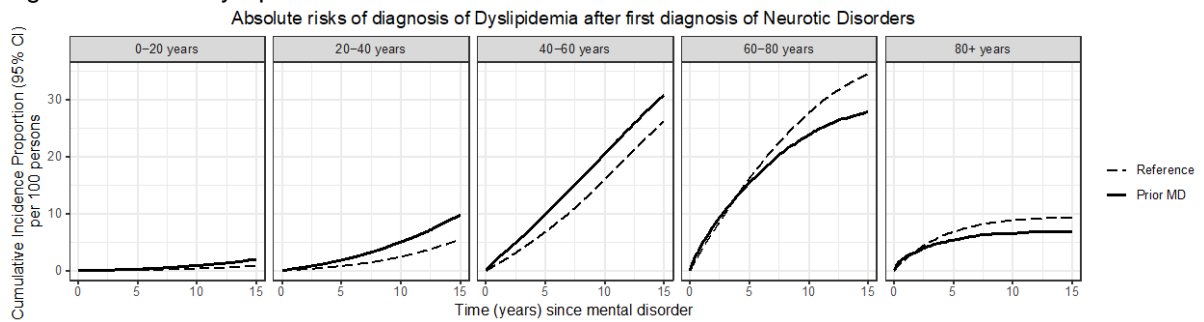

**Figure S127.3 – Ischemic Heart Disease**

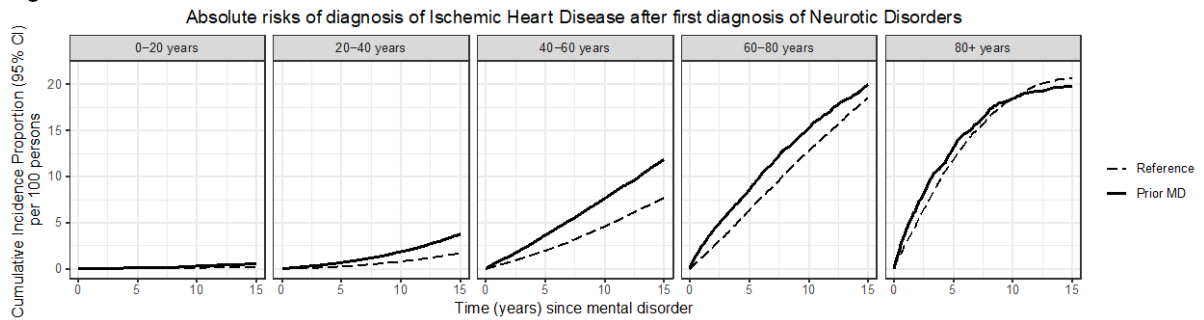

**Figure S127.4 – Atrial Fibrillation**

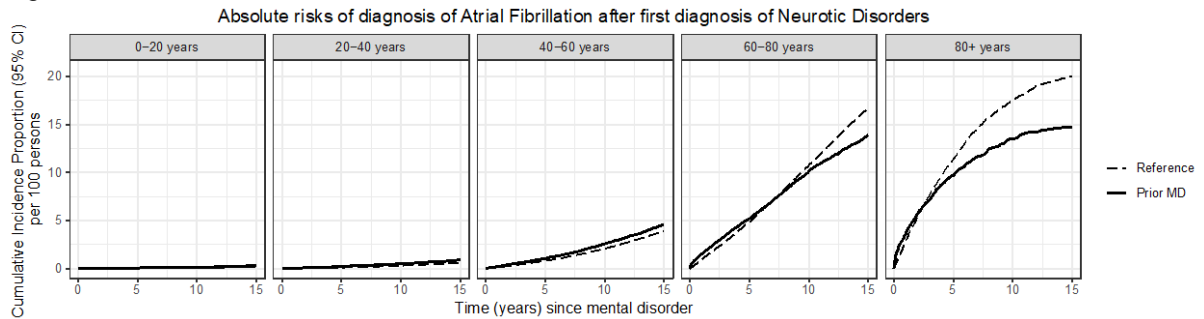

Figure S127.5 – Heart Failure

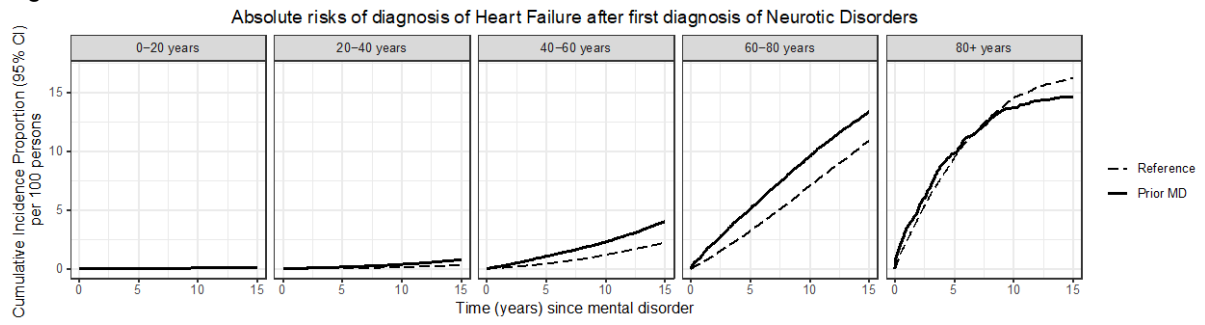

Figure S127.6 – Peripheral Artery Occlusive Disease

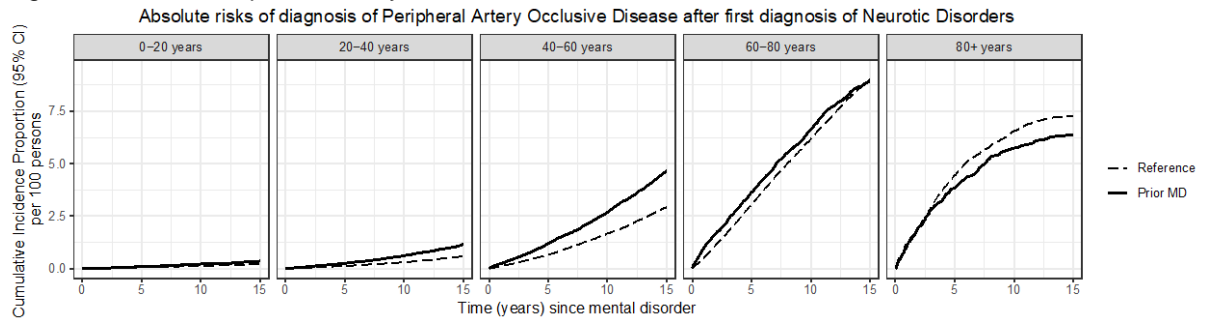

Figure S127.7 – Stroke

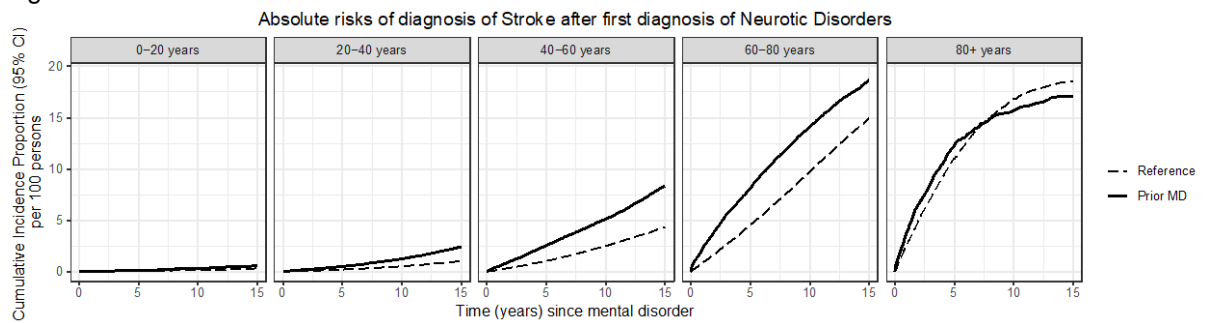

Figure S127.8 – Diabetes Mellitus

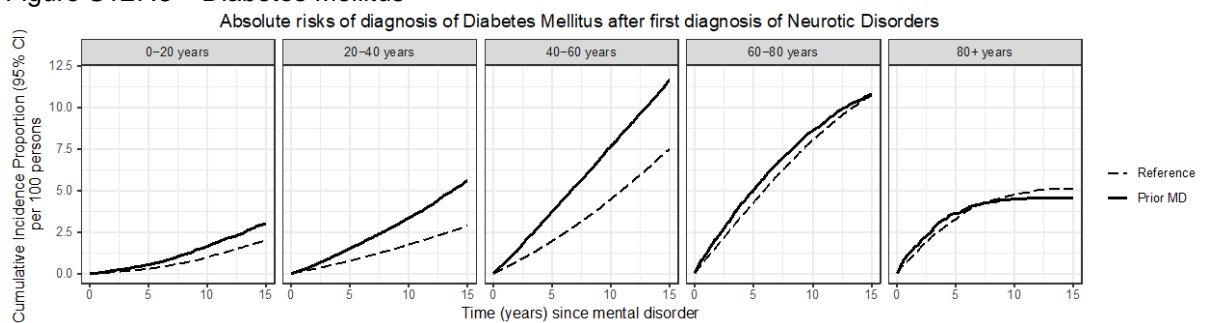

Figure S127.9 – Thyroid Disorders

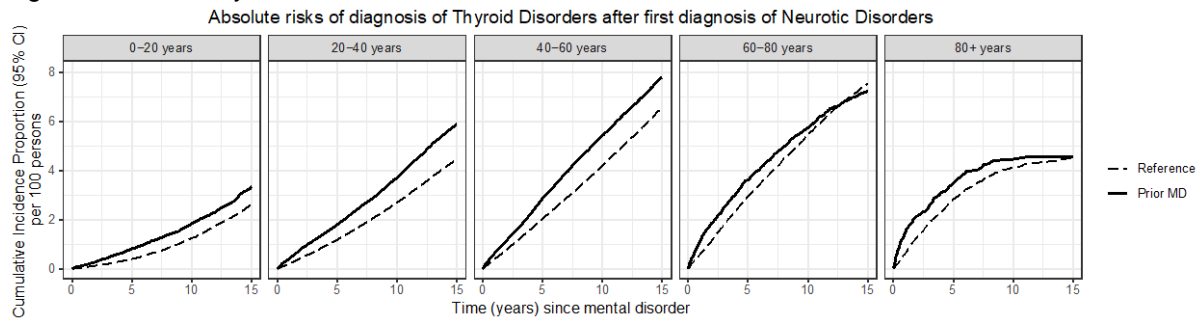

Figure S127.10 – Gout

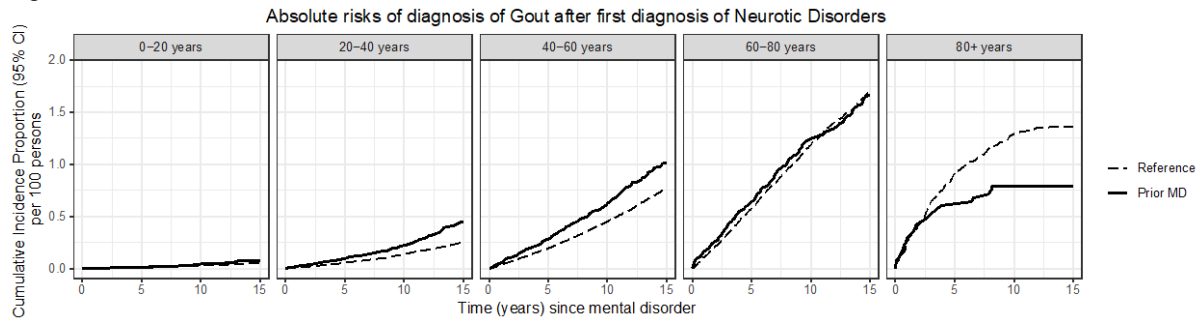

Figure S127.11 – Chronic Pulmonary Disease

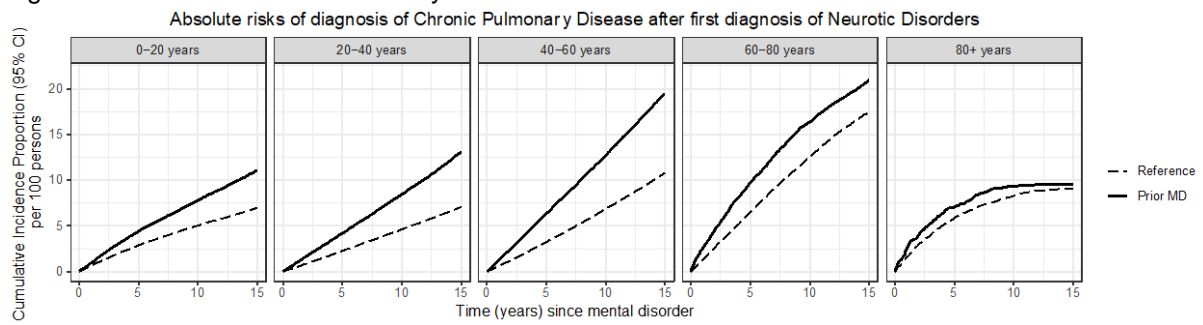

Figure S127.12 – Allergy

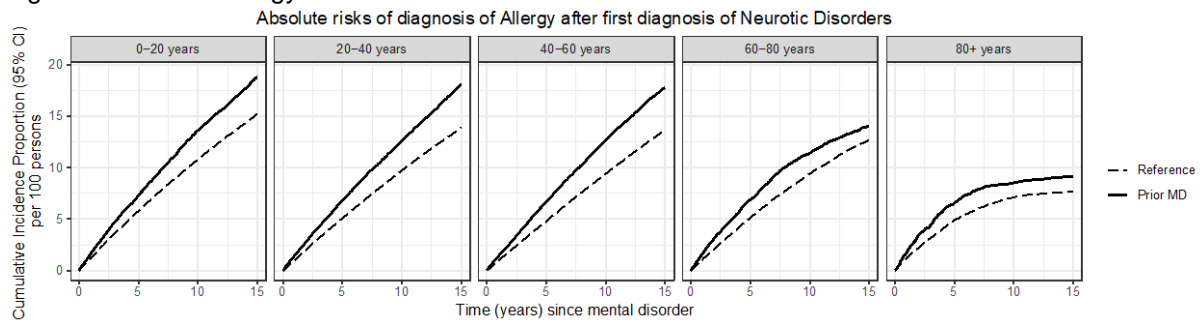

Figure S127.13 – Ulcer/Chronic Gastritis

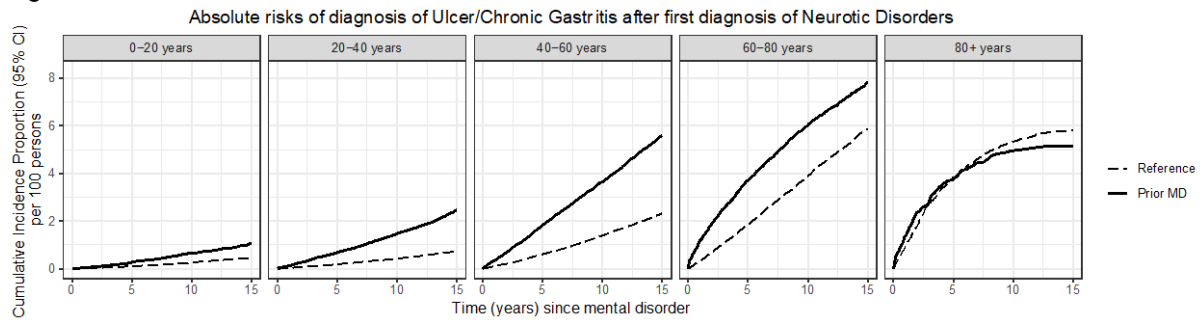

Figure S127.14 – Chronic Liver Disease

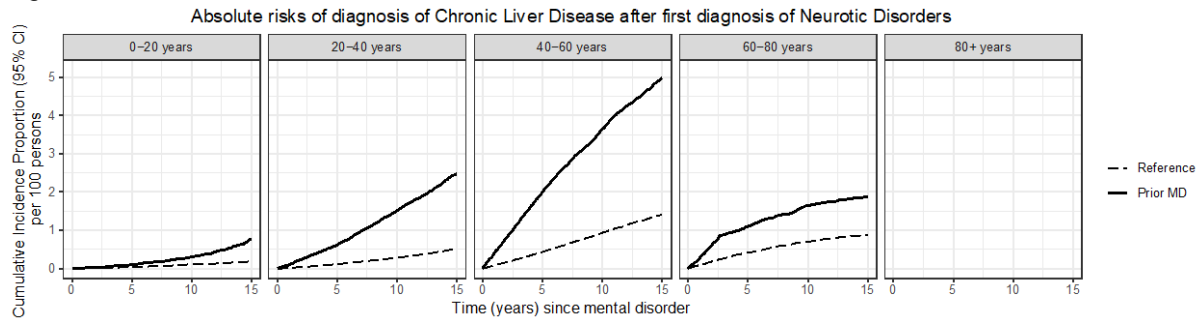

Figure S127.15 – Inflammatory Bowel Disease

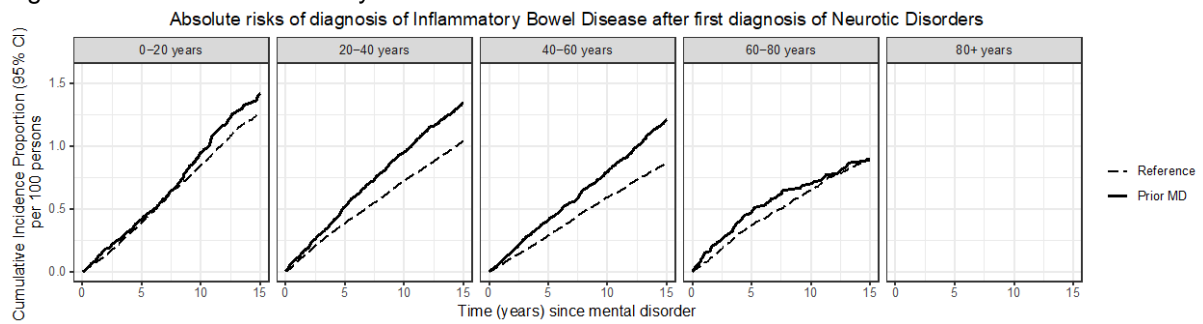

Figure S127.16 – Diverticular Disease of the Intestine

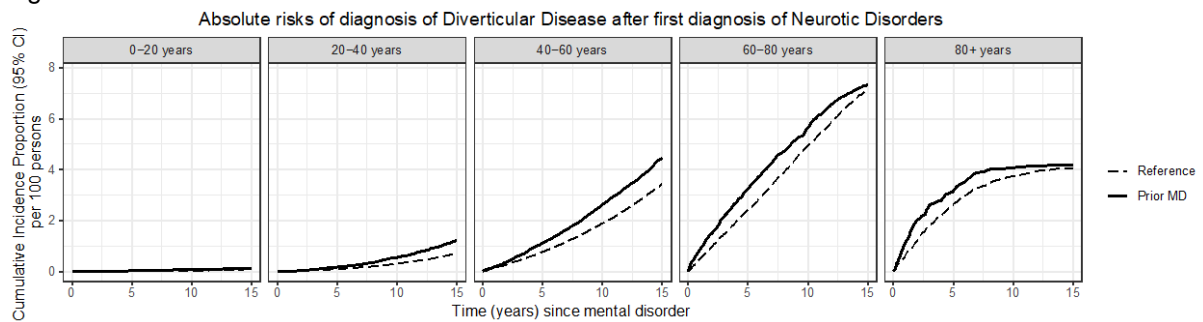

Figure S127.17 – Chronic Kidney Disease

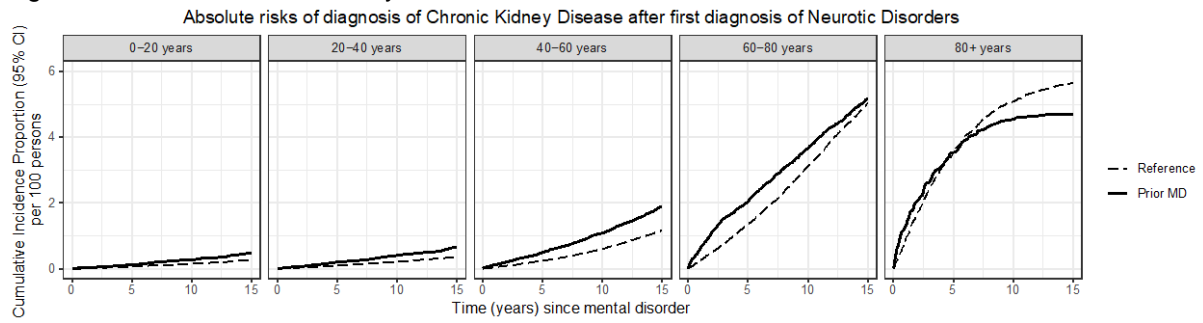

Figure S127.18 – Prostate Disorders

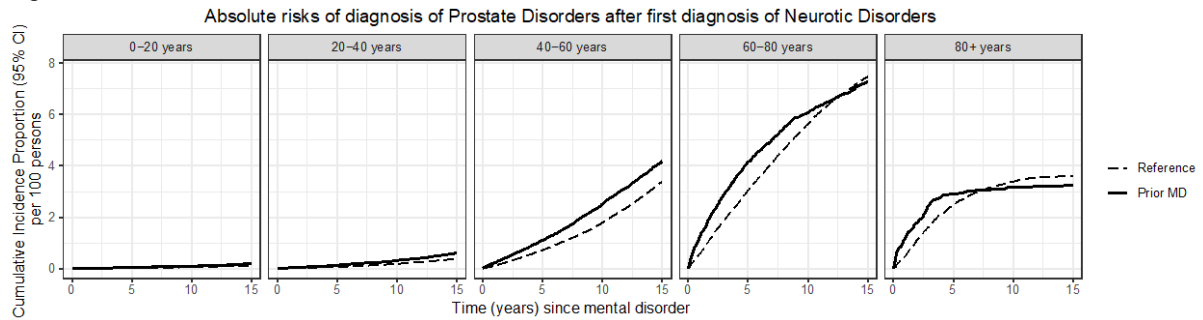

Figure S127.19 – Connective Tissue Disorders

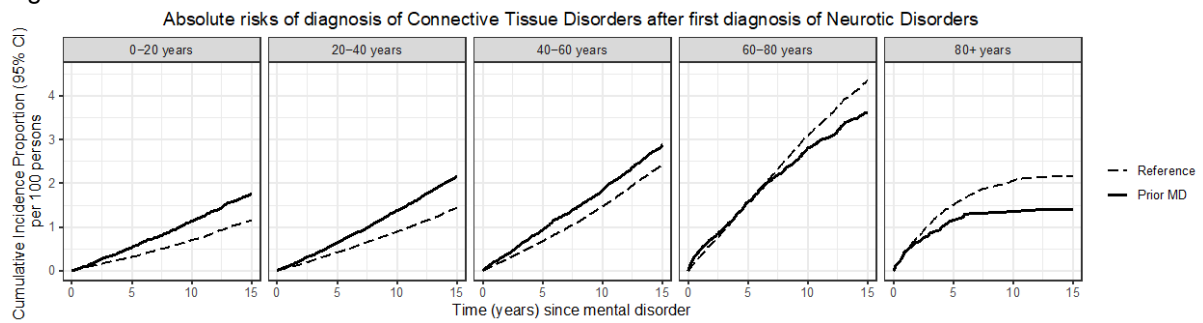

Figure S127.20 – Osteoporosis

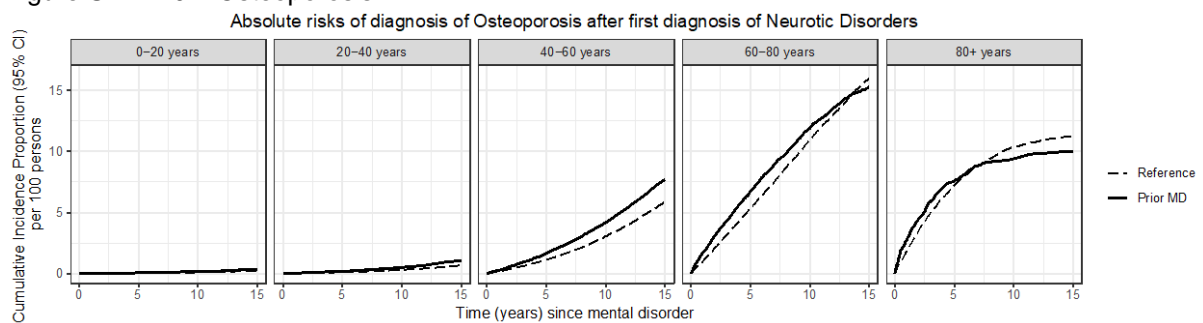

Figure S127.21 – Painful Conditions

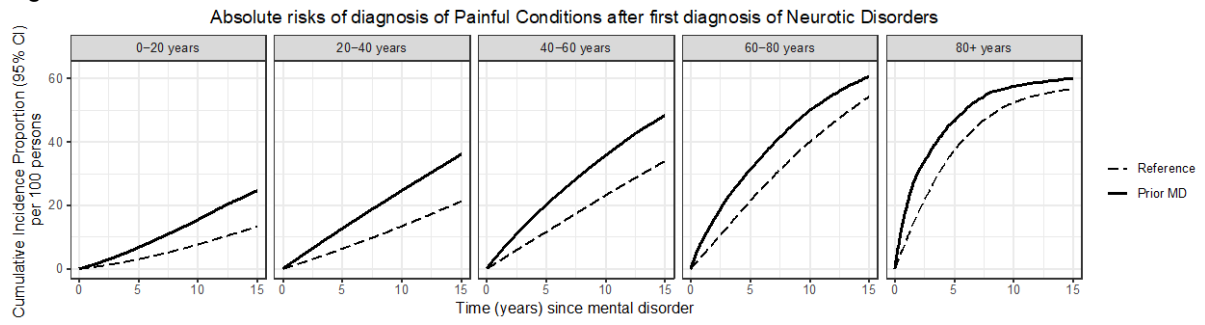

Figure S127.22 – HIV/AIDS

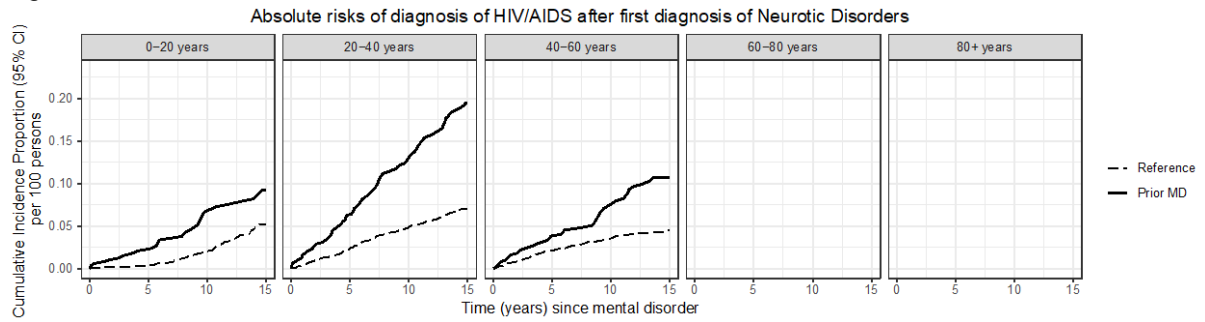

Figure S127.23 – Anemias

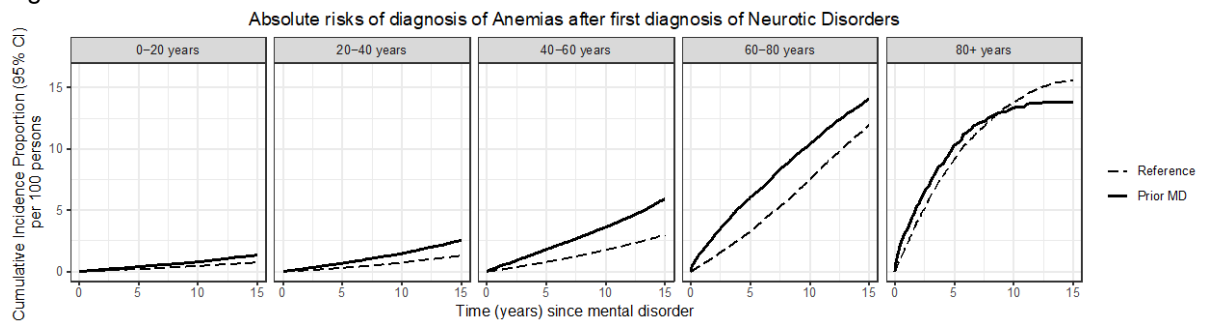

Figure S127.24 – Cancer

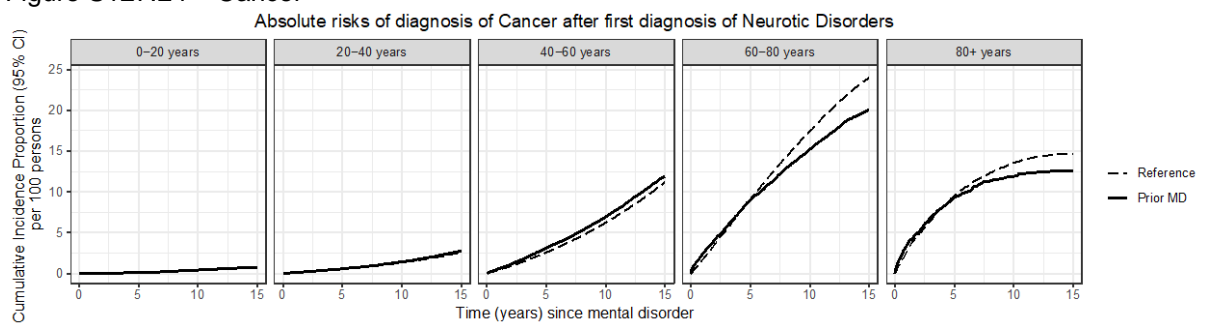

Figure S127.25 – Vision Problems

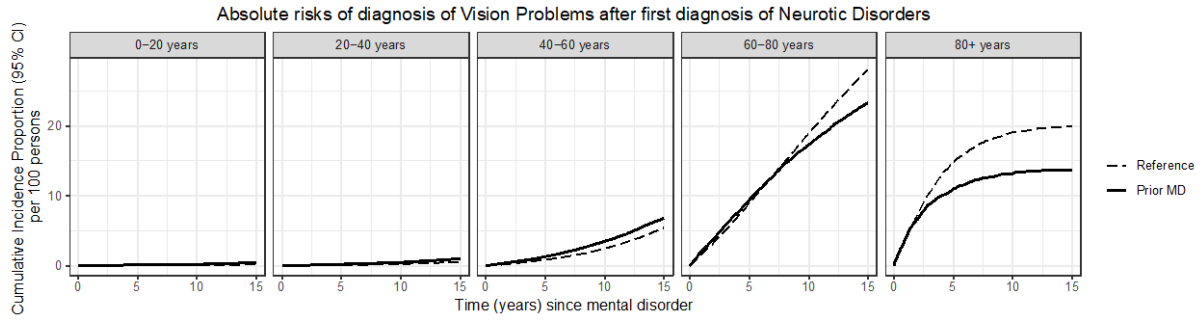

Figure S127.26 – Hearing Problems

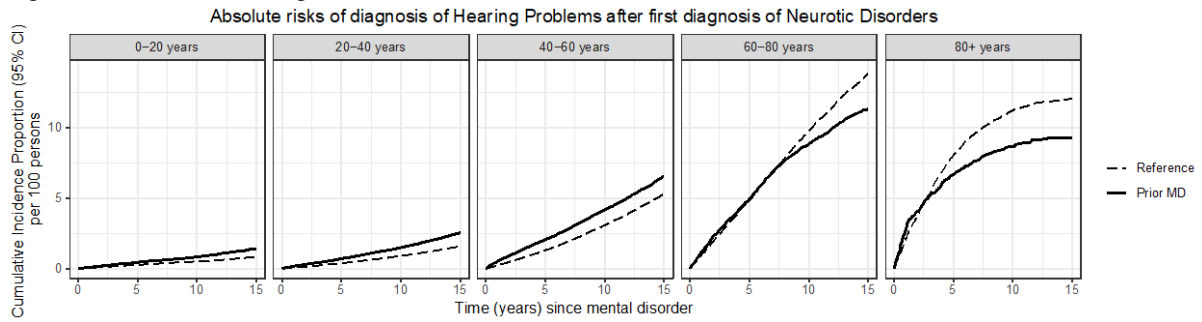

Figure S127.27 – Migraine

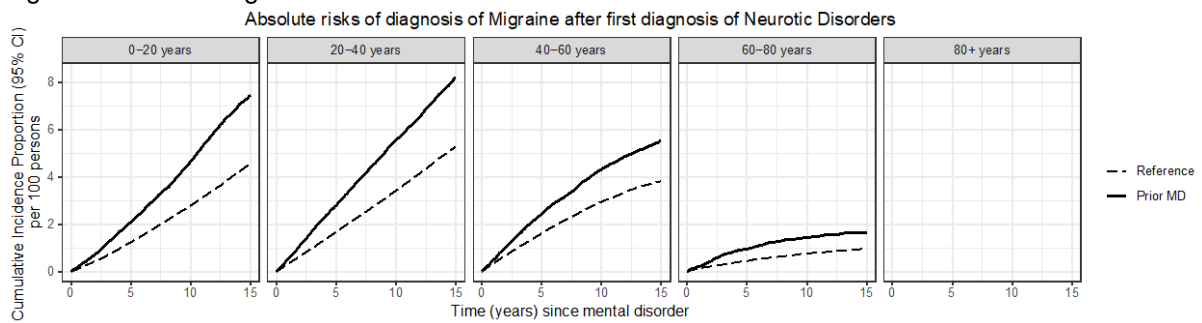

Figure S127.28 – Epilepsy

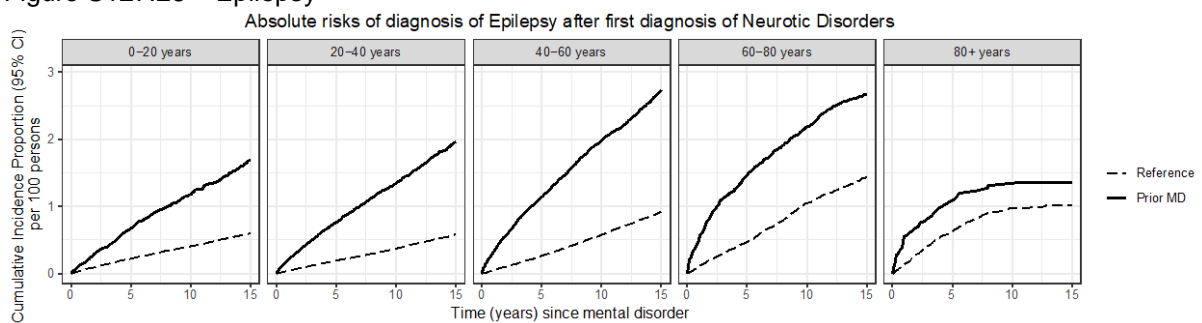

Figure S127.29 – Parkinson's Disease

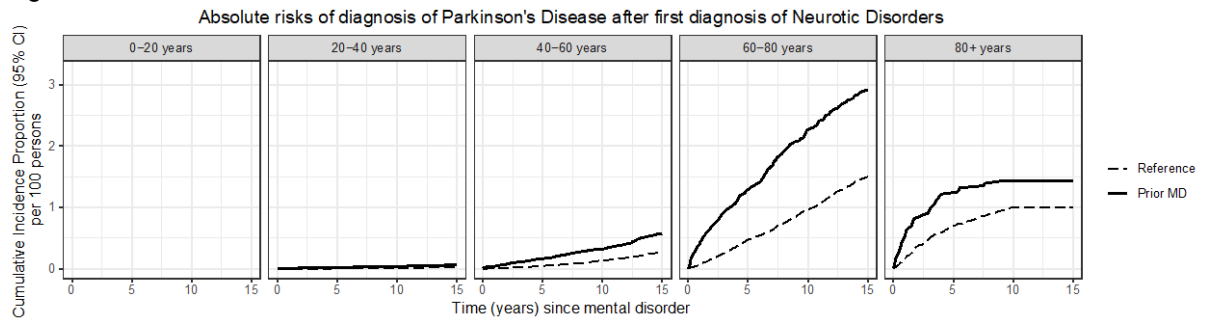

Figure S127.30 – Multiple Sclerosis

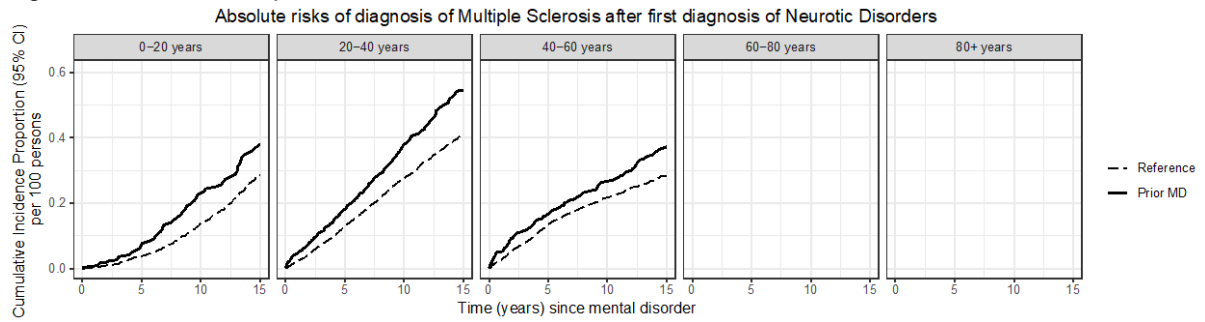

Figure S127.31 – Neuropathies

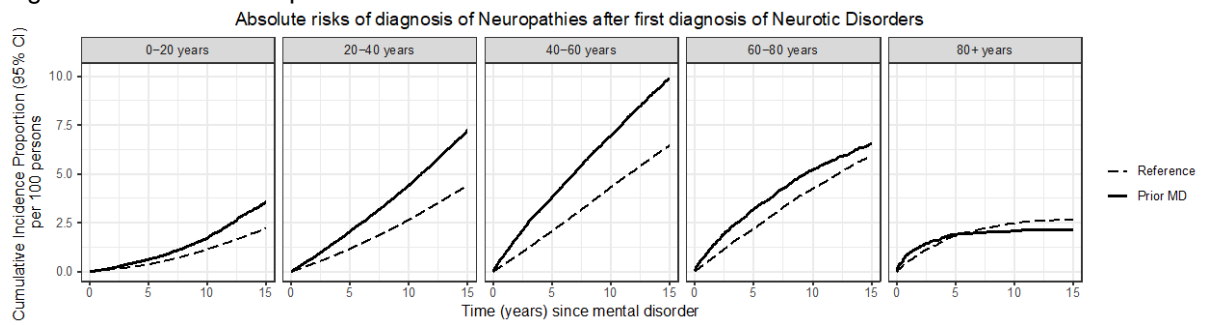



**Figures S128.1-S128.31. Absolute risks of being diagnosed with general medical conditions after a first diagnosis of Eating Disorders**

**Figure S128.1 – Hypertension**

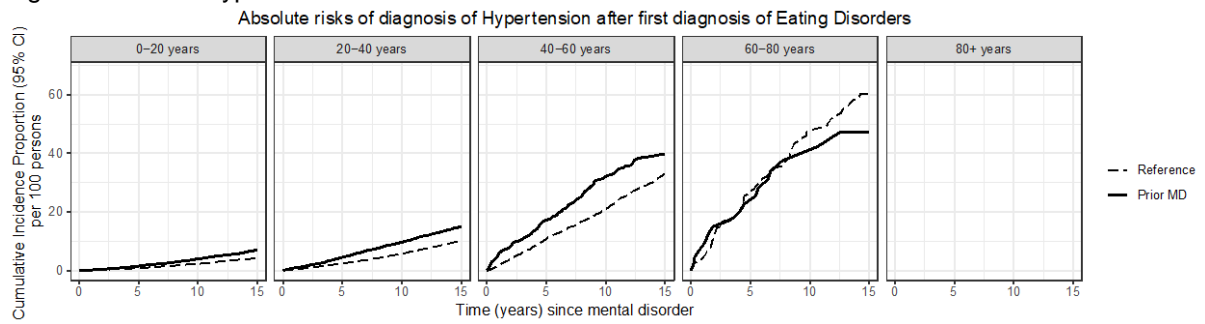

**Figure S128.2 – Dyslipidemia**

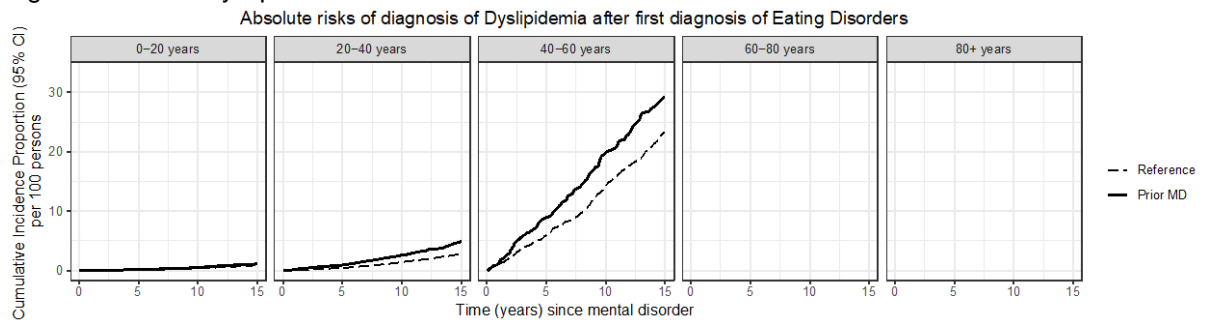

**Figure S128.3 – Ischemic Heart Disease**

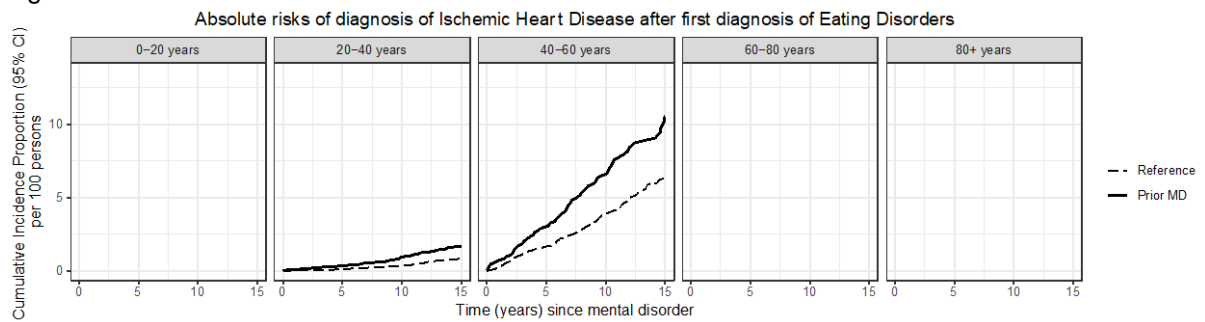

**Figure S128.4 – Atrial Fibrillation**

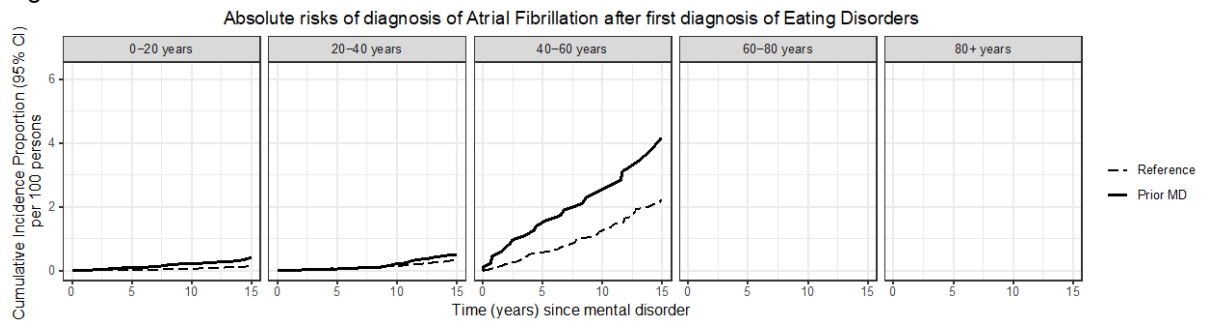

Figure S128.5 – Heart Failure

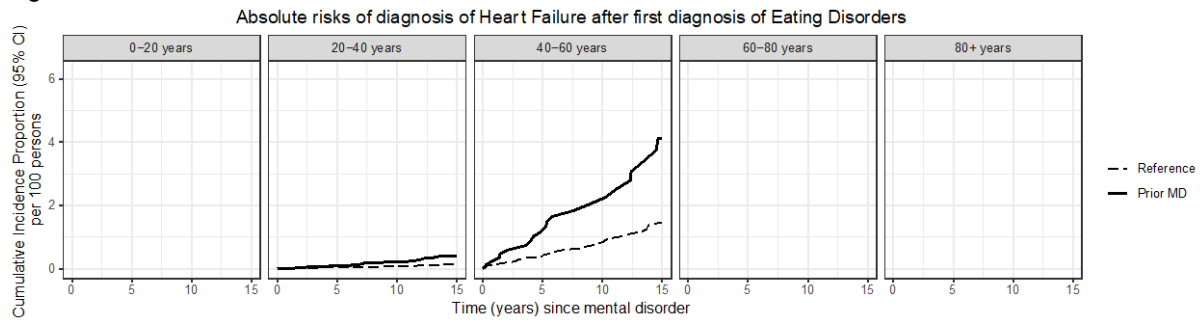

Figure S128.6 – Peripheral Artery Occlusive Disease

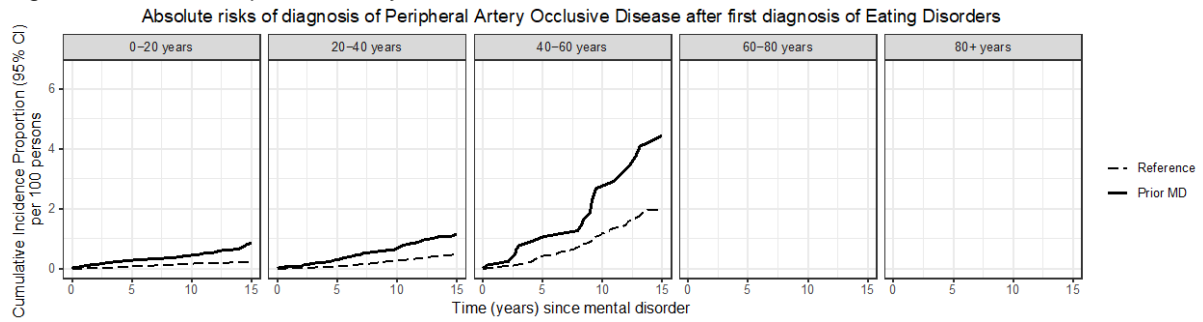

Figure S128.7 – Stroke

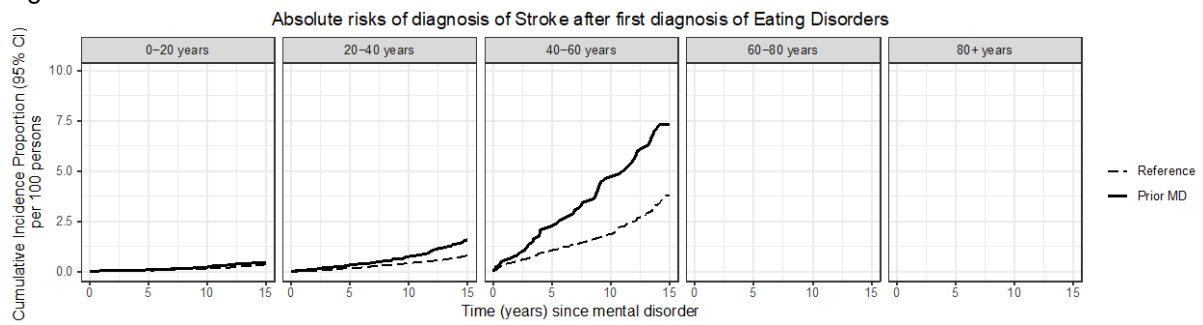

Figure S128.8 – Diabetes Mellitus

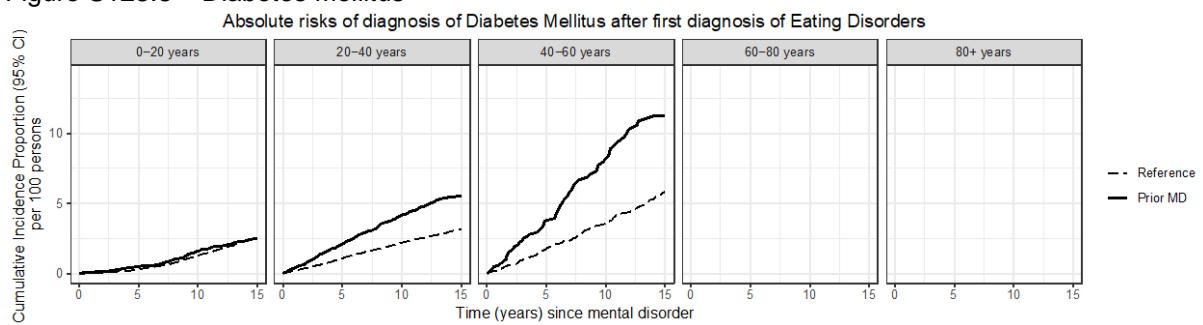

Figure S128.9 – Thyroid Disorders

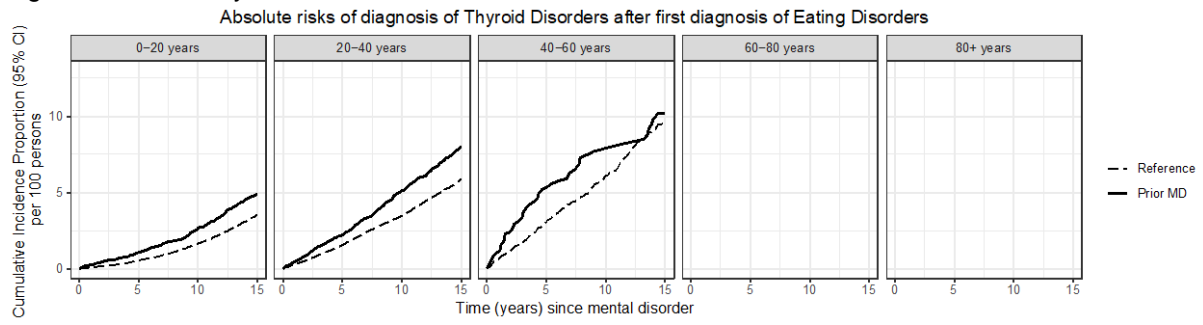

Figure S128.10 – Gout

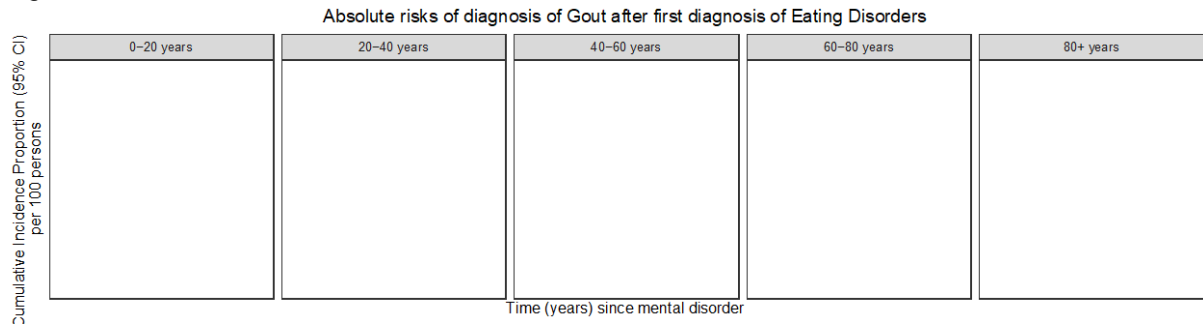

Figure S128.11 – Chronic Pulmonary Disease

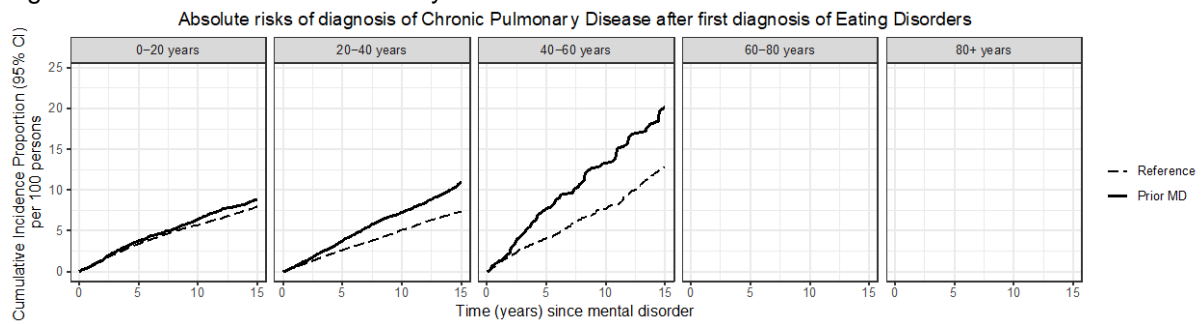

Figure S128.12 – Allergy

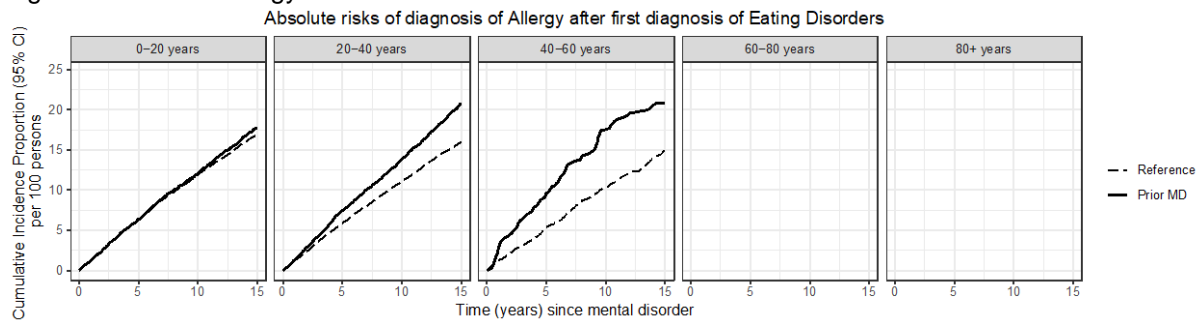

Figure S128.13 – Ulcer/Chronic Gastritis

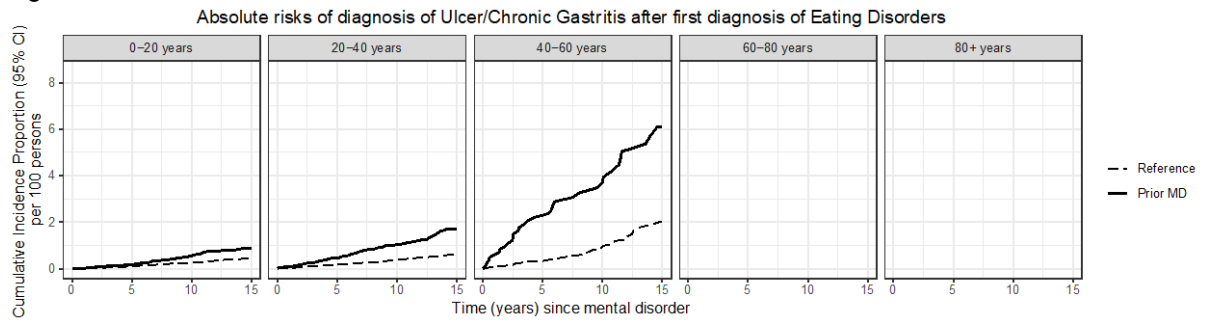

Figure S128.14 – Chronic Liver Disease

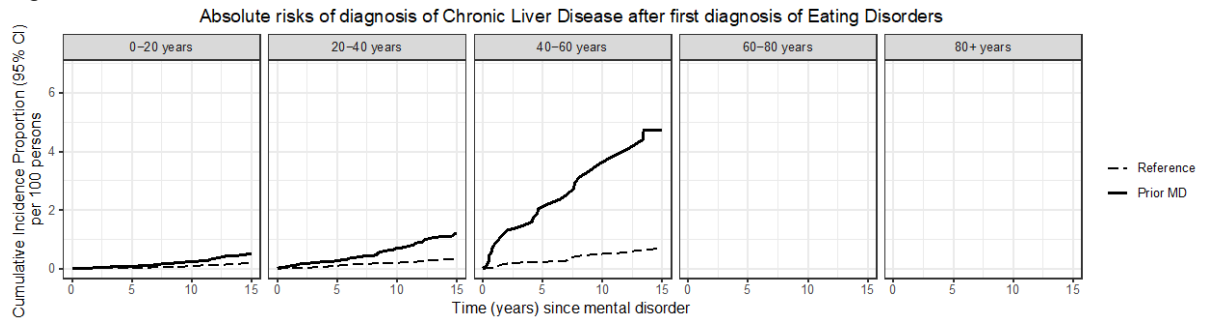

Figure S128.15 – Inflammatory Bowel Disease

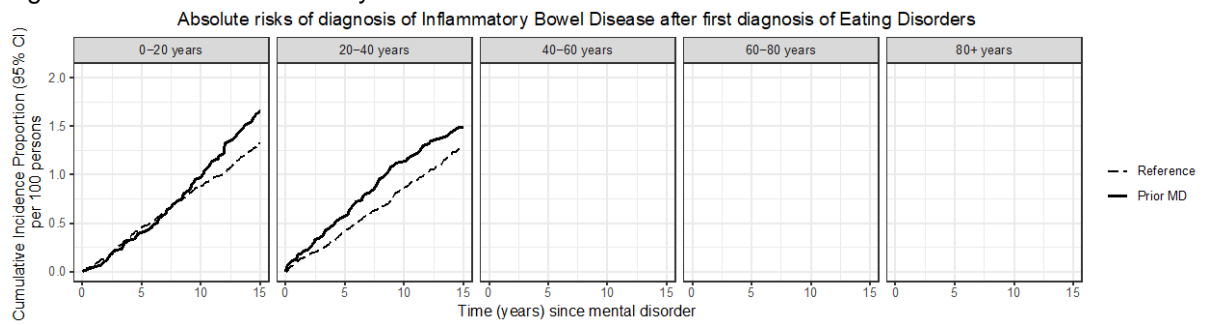

Figure S128.16 – Diverticular Disease of the Intestine

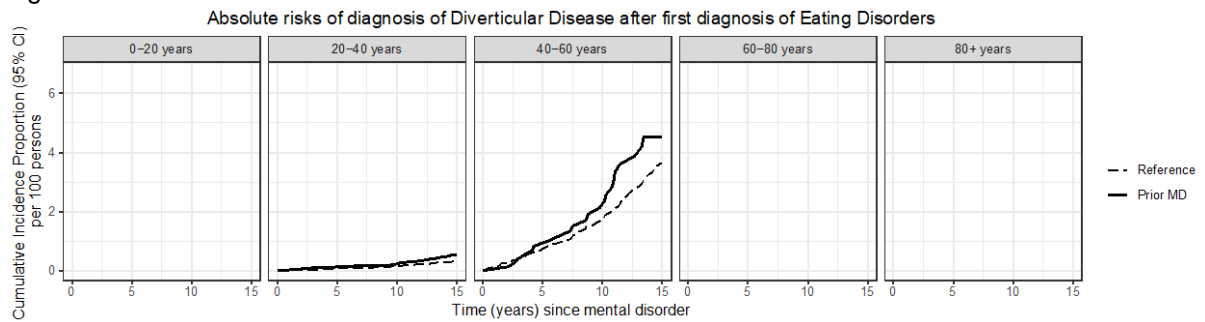

Figure S128.17 – Chronic Kidney Disease

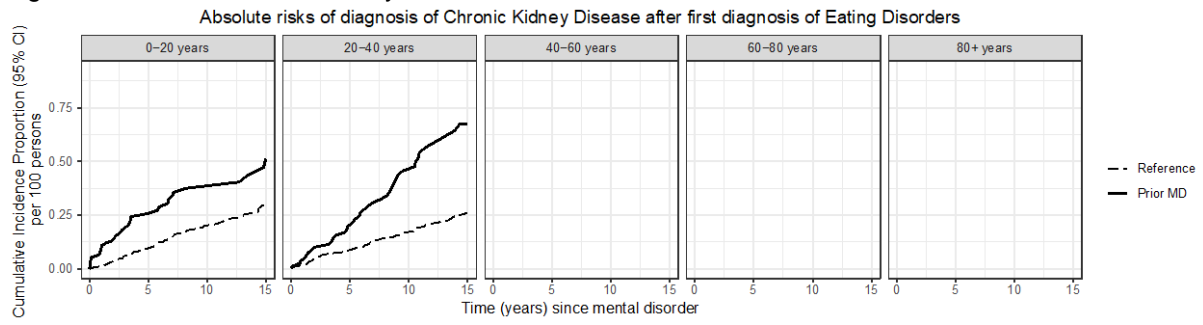

Figure S128.18 – Prostate Disorders

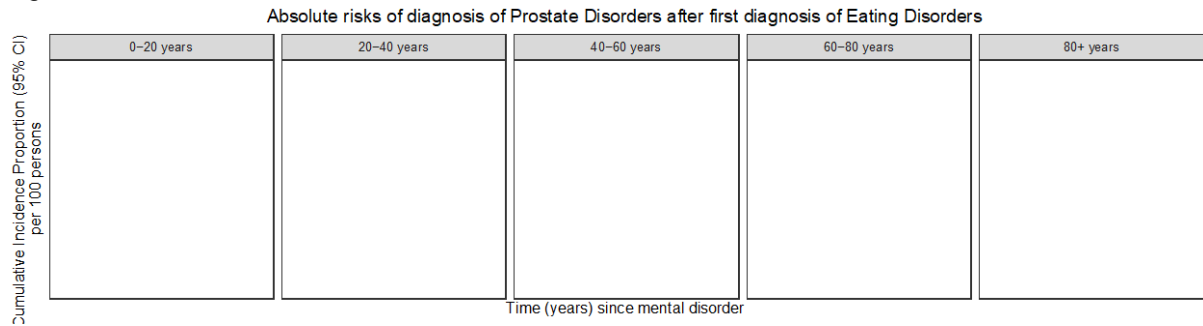

Figure S128.19 – Connective Tissue Disorders

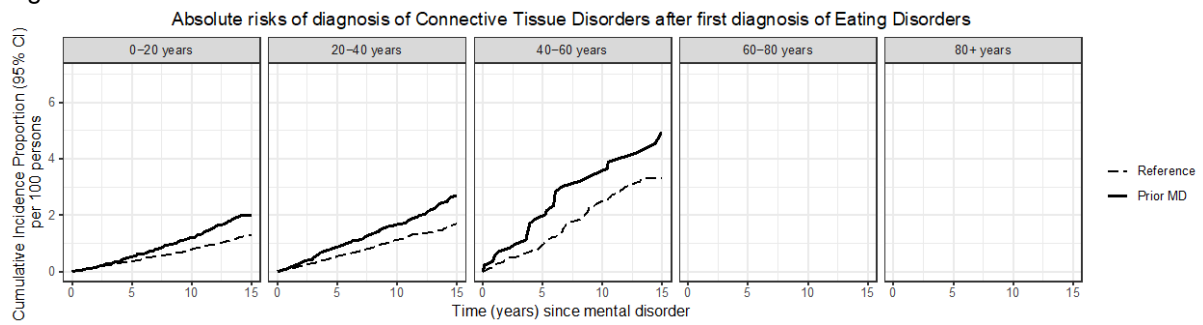

Figure S128.20 – Osteoporosis

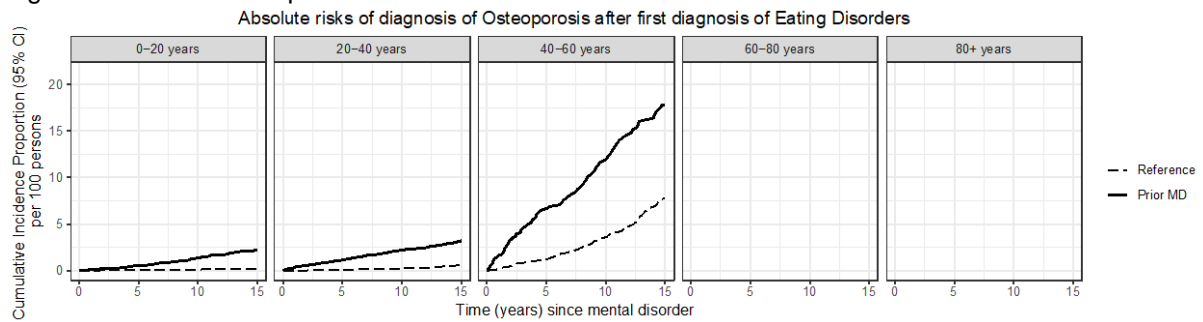

Figure S128.21 – Painful Conditions

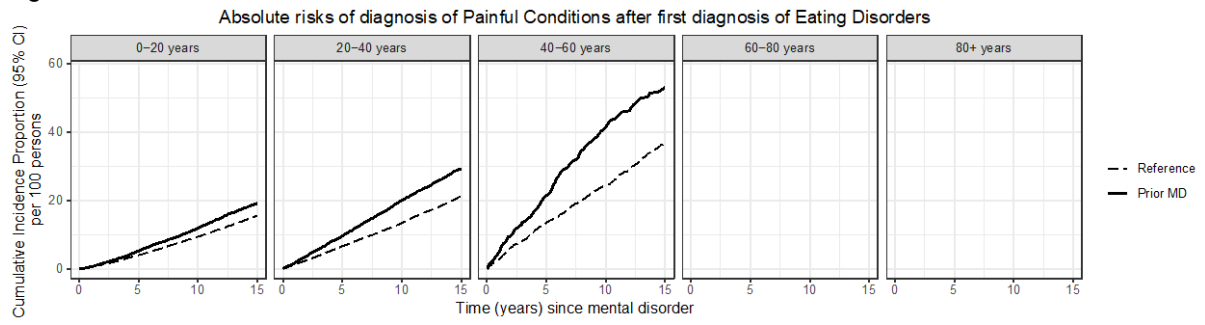

Figure S128.22 – HIV/AIDS

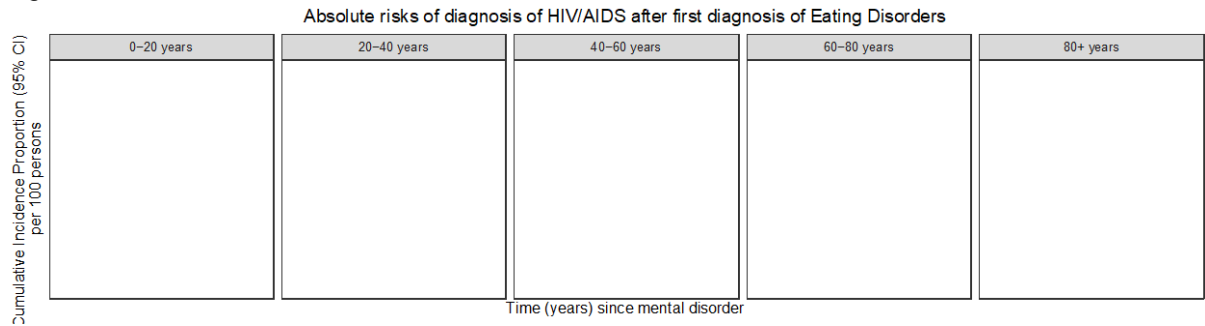

Figure S128.23 – Anemias

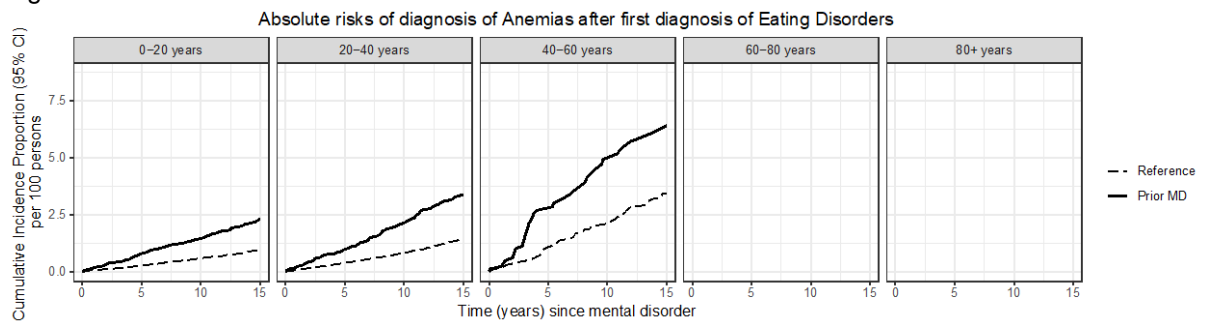

Figure S128.24 – Cancer

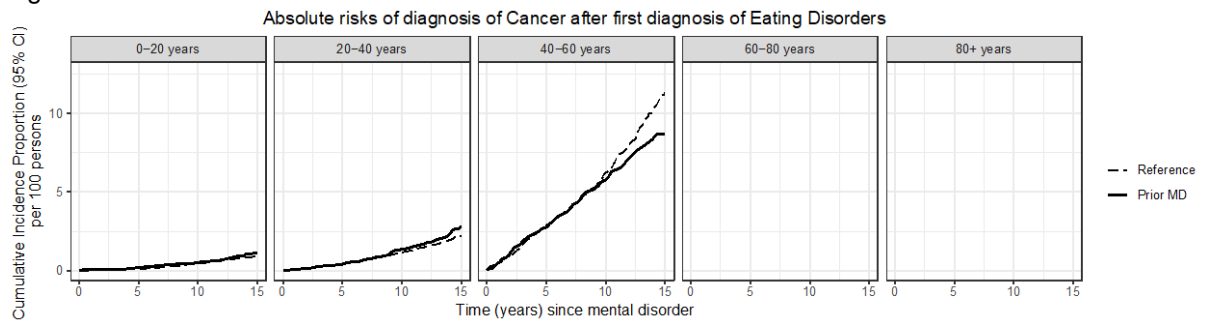

Figure S128.25 – Vision Problems

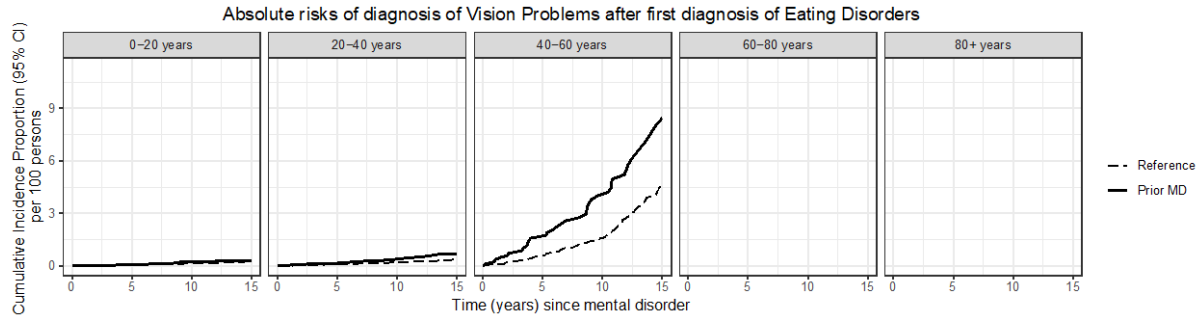

Figure S128.26 – Hearing Problems

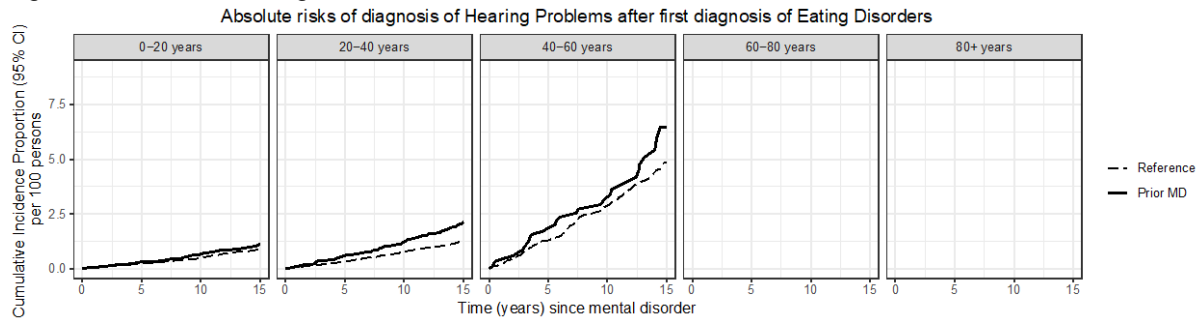

Figure S128.27 – Migraine

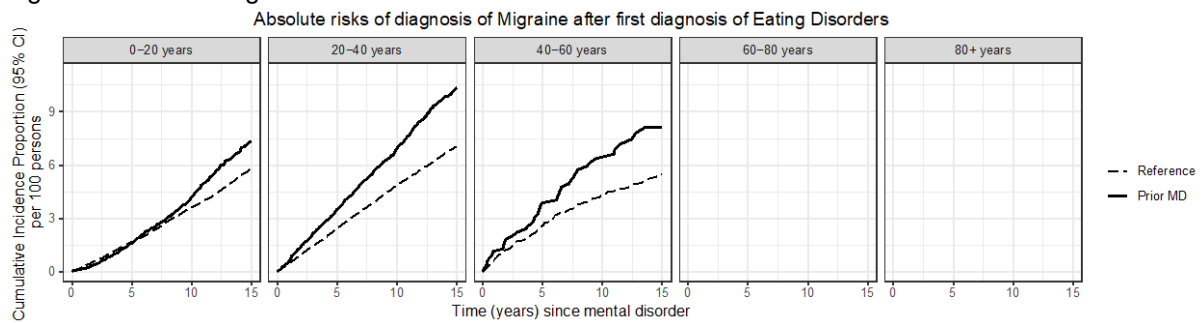

Figure S128.28 – Epilepsy

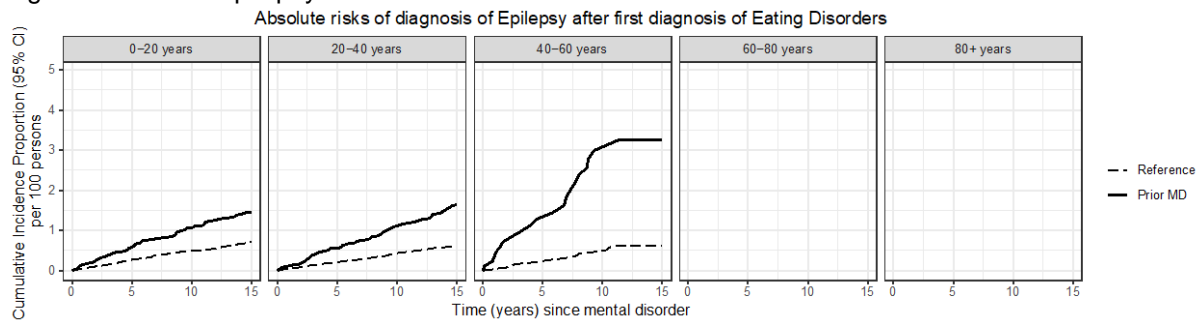

Figure S128.29 – Parkinson's Disease

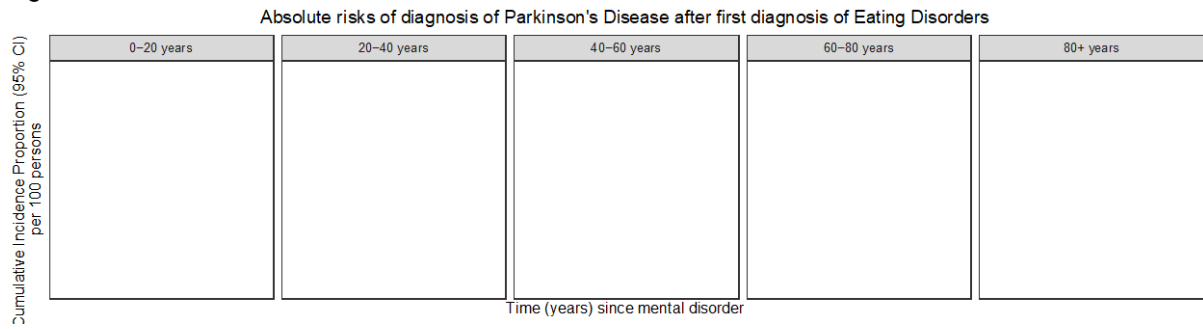

Figure S128.30 – Multiple Sclerosis

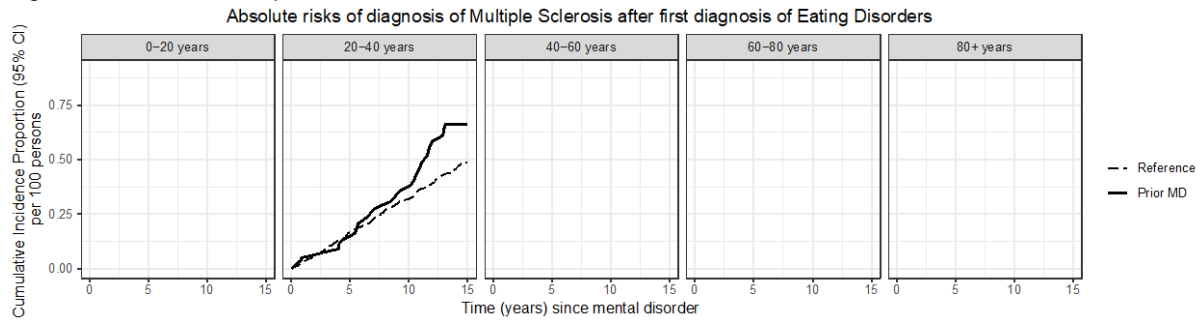

Figure S128.31 – Neuropathies

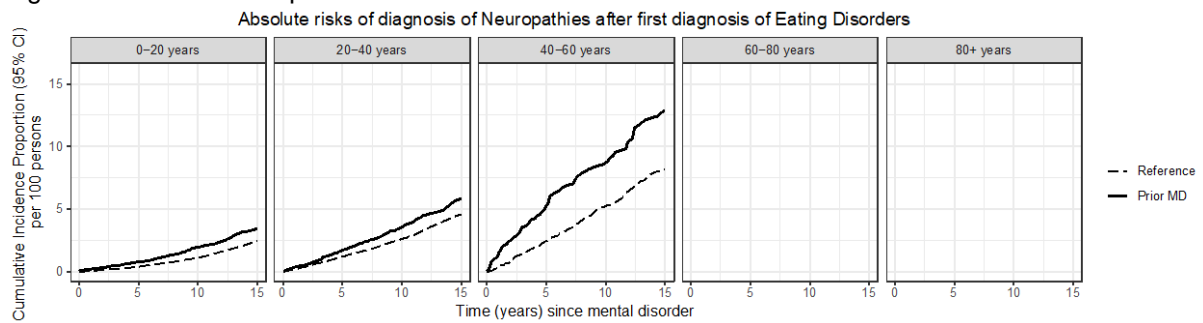



**Figures S129.1-S129.31. Absolute risks of being diagnosed with general medical conditions after a first diagnosis of Personality Disorders.**

**Figure S129.1 – Hypertension**

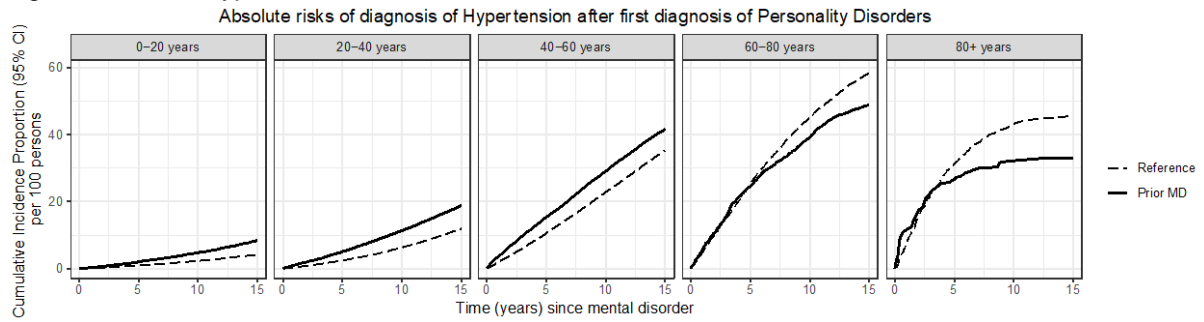

**Figure S129.2 – Dyslipidemia**

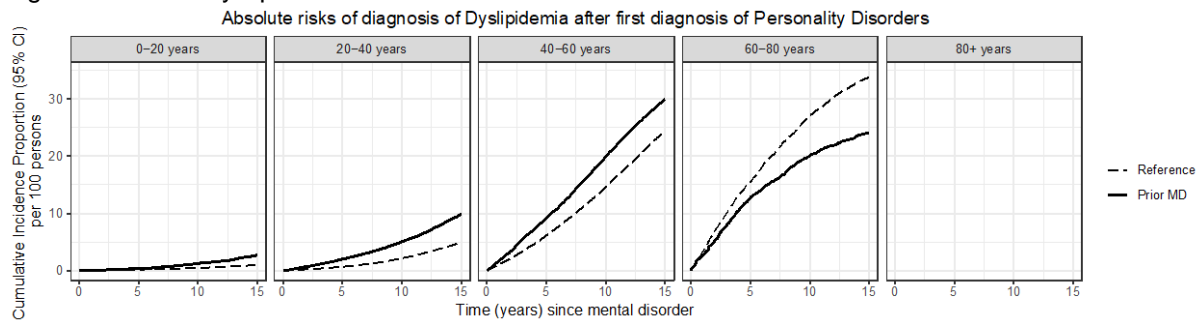

**Figure S129.3 – Ischemic Heart Disease**

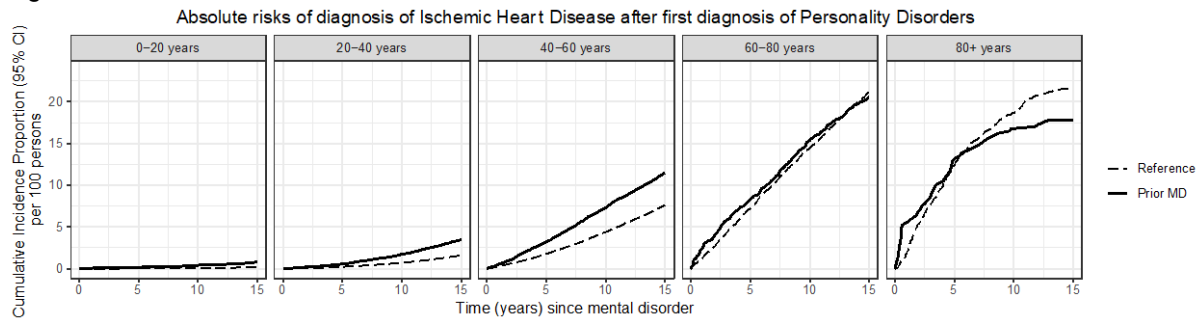

**Figure S129.4 – Atrial Fibrillation**

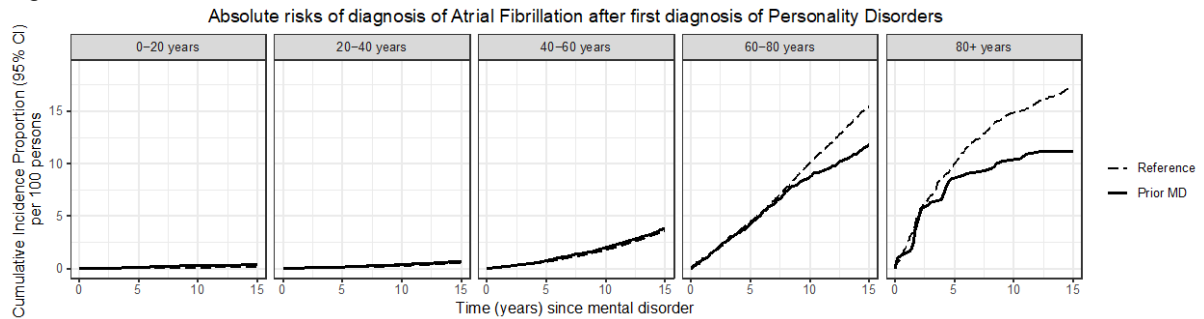

Figure S129.5 – Heart Failure

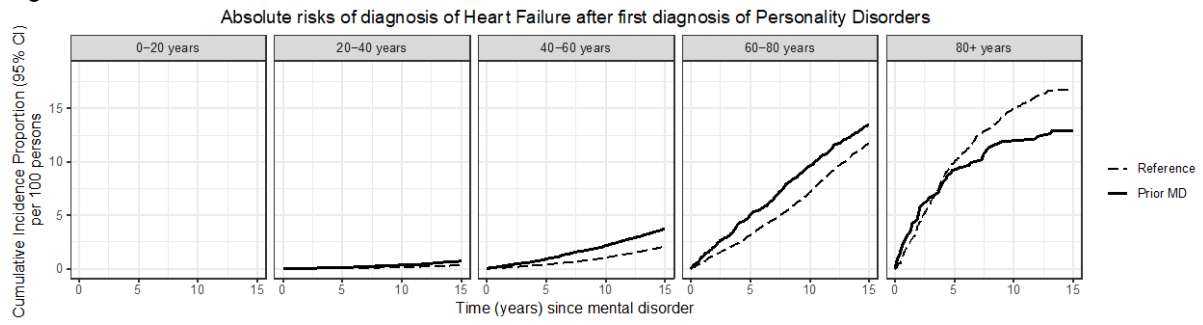

Figure S129.6 – Peripheral Artery Occlusive Disease

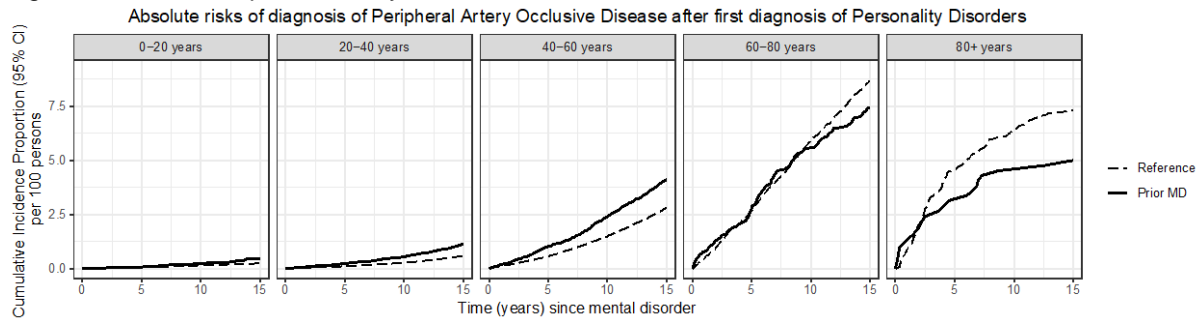

Figure S129.7 – Stroke

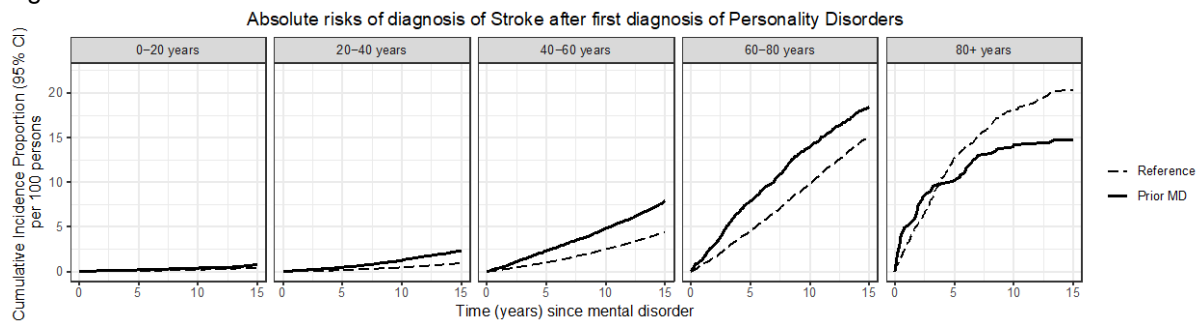

Figure S129.8 – Diabetes Mellitus

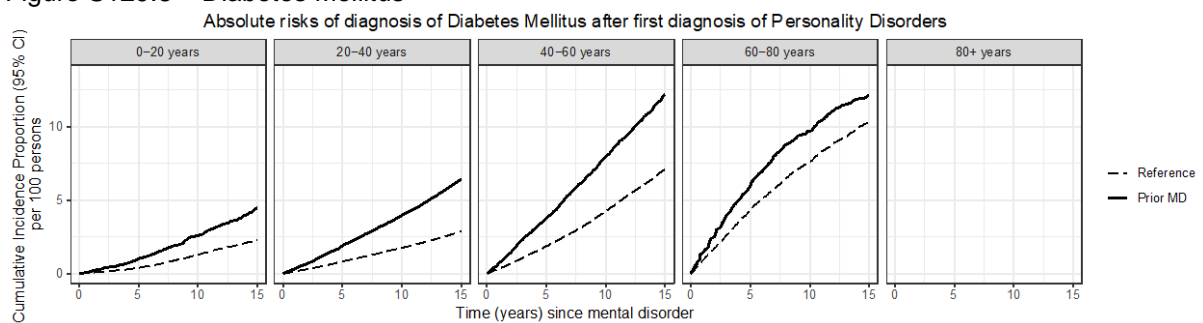

Figure S129.9 – Thyroid Disorders

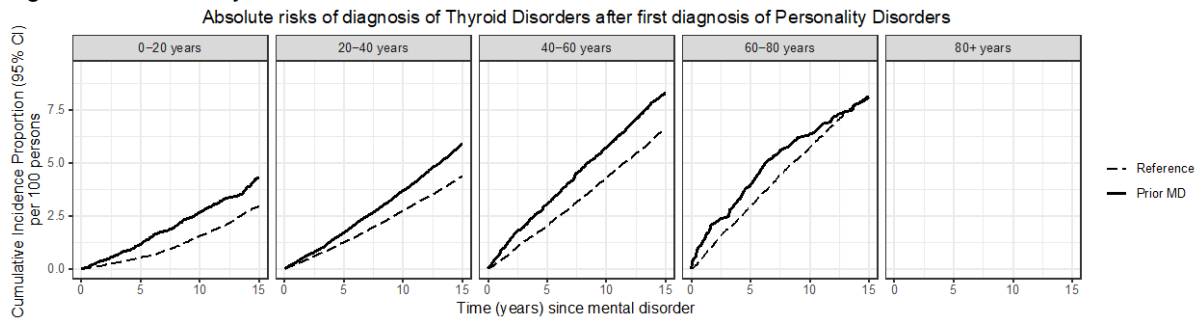

Figure S129.10 – Gout

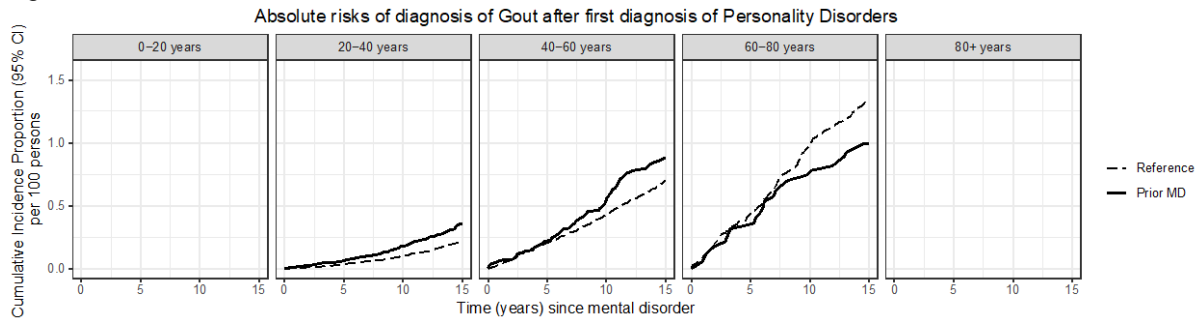

Figure S129.11 – Chronic Pulmonary Disease

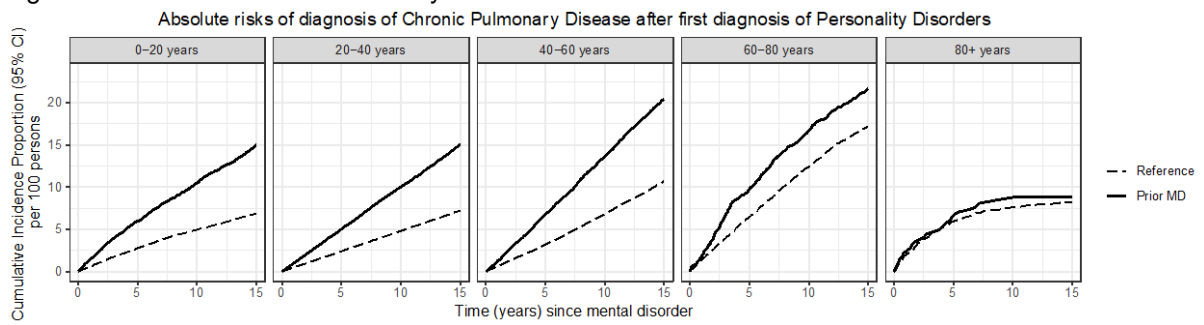

Figure S129.12 – Allergy

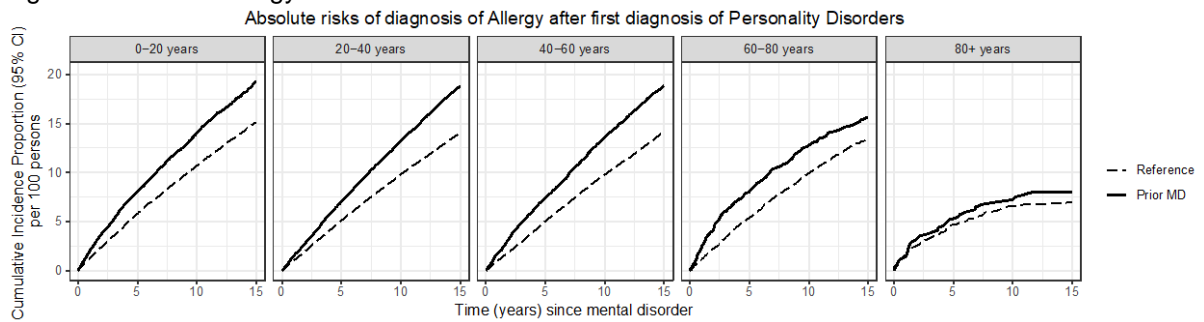

Figure S129.13 – Ulcer/Chronic Gastritis

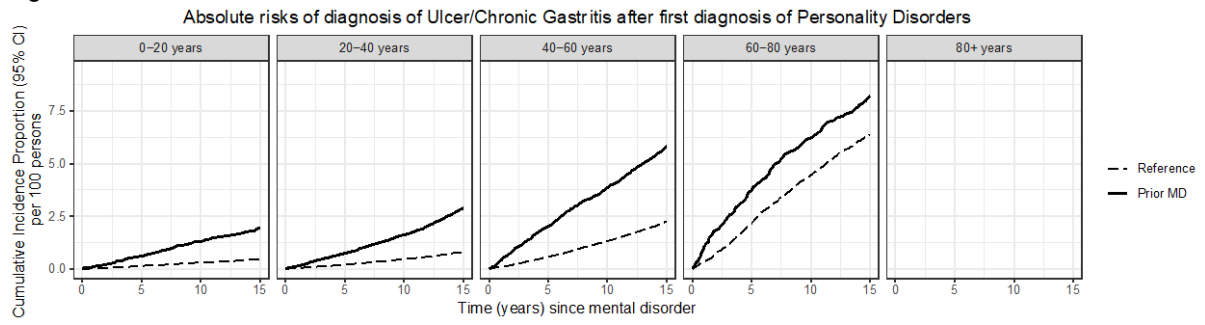

Figure S129.14 – Chronic Liver Disease

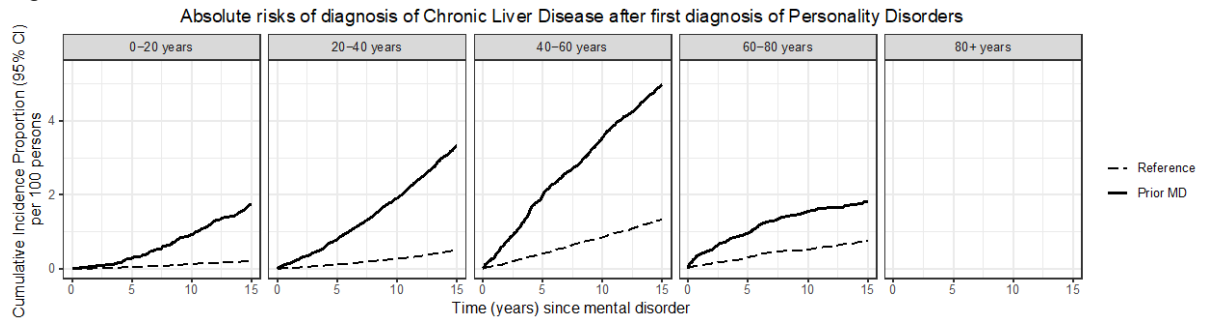

Figure S129.15 – Inflammatory Bowel Disease

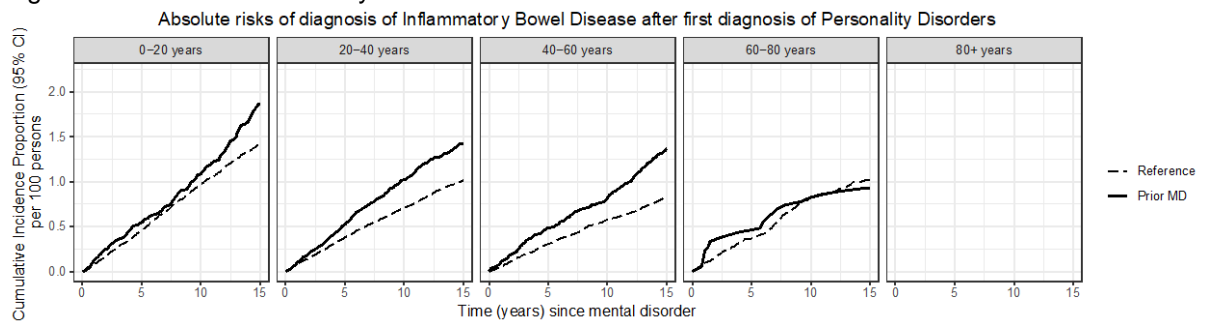

Figure S129.16 – Diverticular Disease of the Intestine

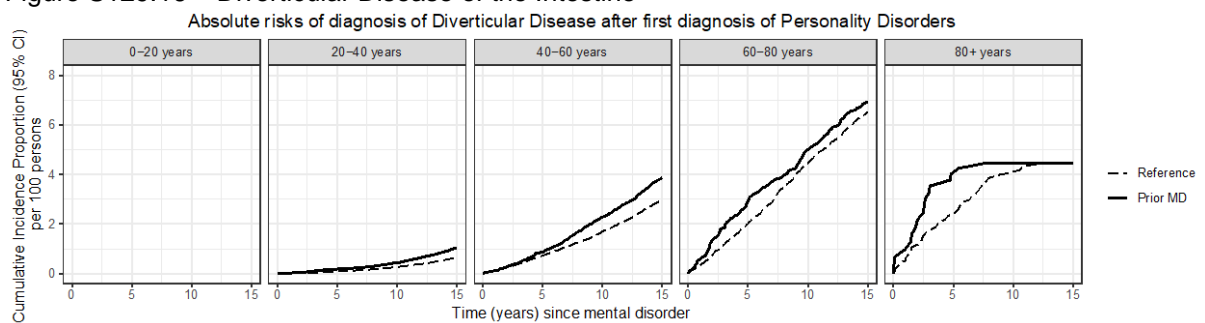

Figure S129.17 – Chronic Kidney Disease

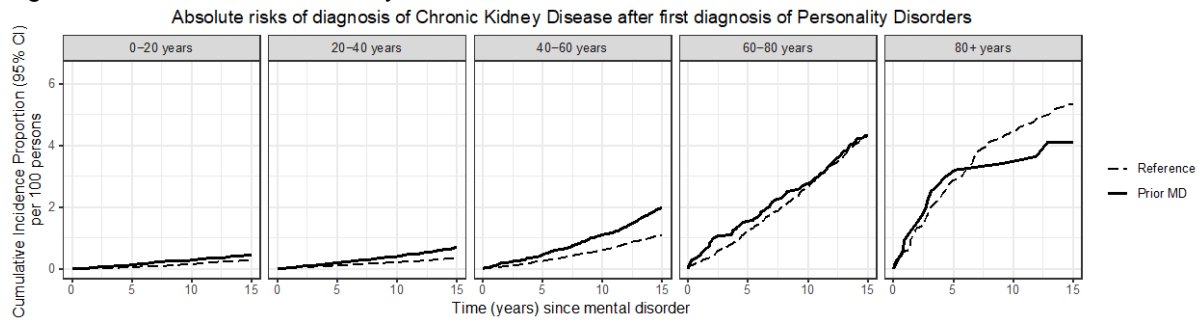

Figure S129.18 – Prostate Disorders

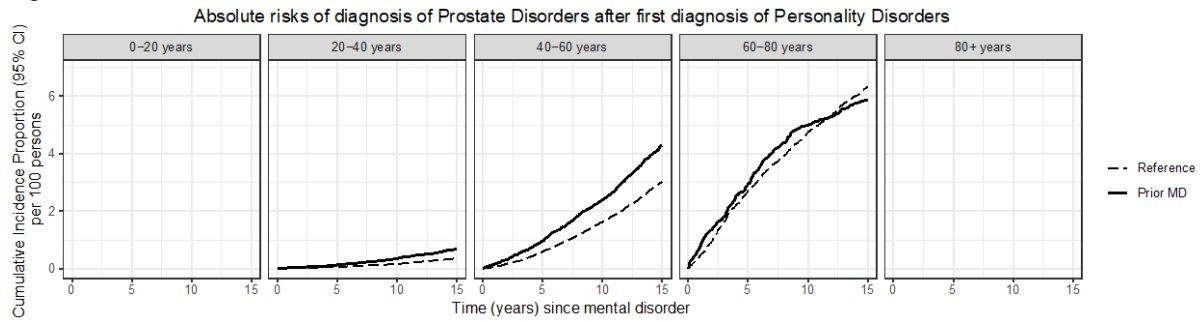

Figure S129.19 – Connective Tissue Disorders

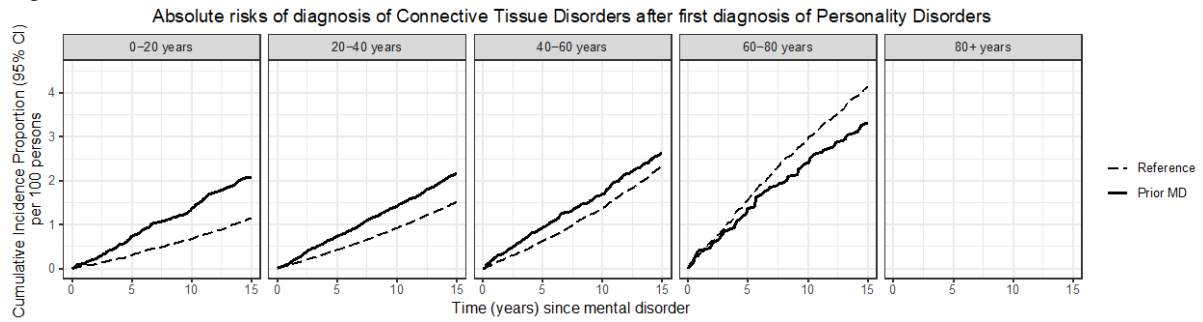

Figure S129.20 – Osteoporosis

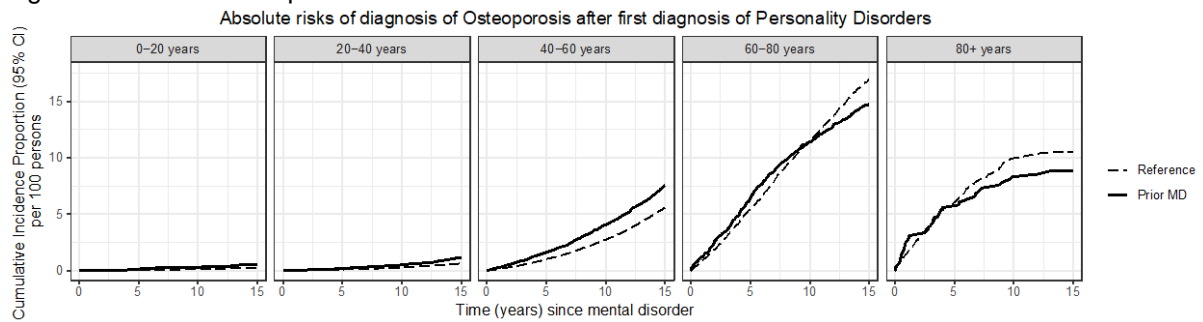

Figure S129.21 – Painful Conditions

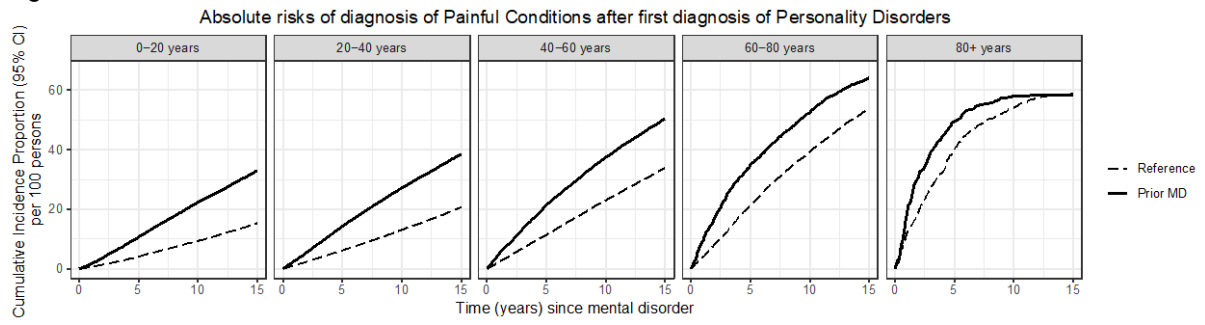

Figure S129.22 – HIV/AIDS

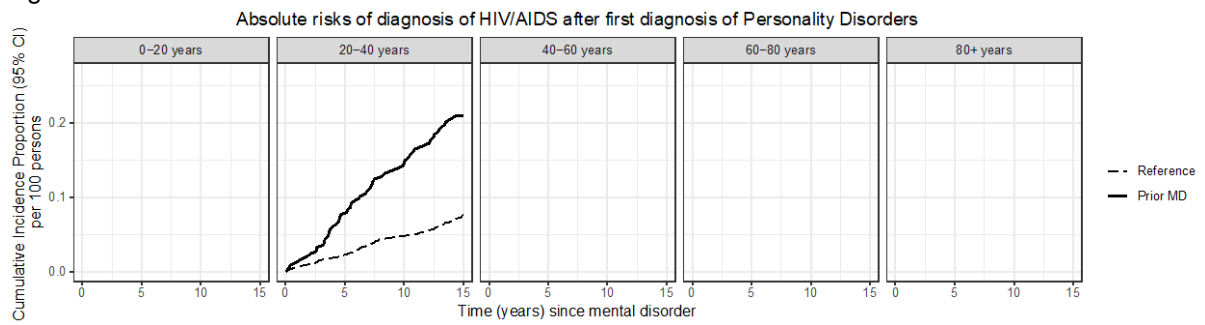

Figure S129.23 – Anemias

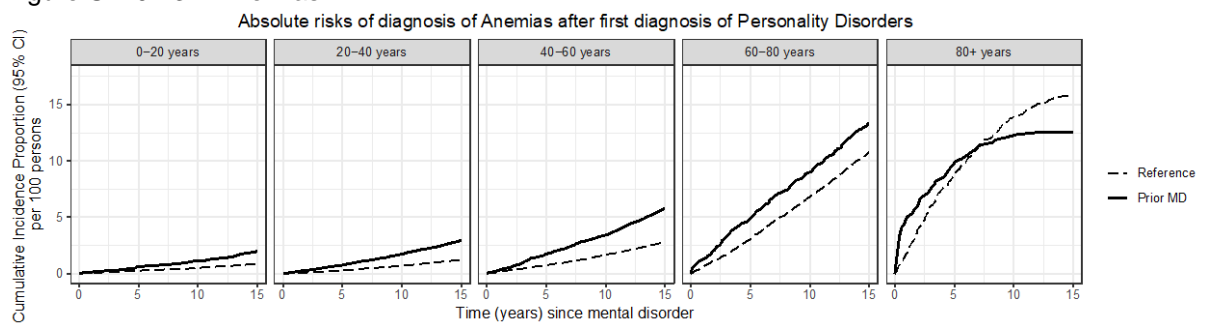

Figure S129.24 – Cancer

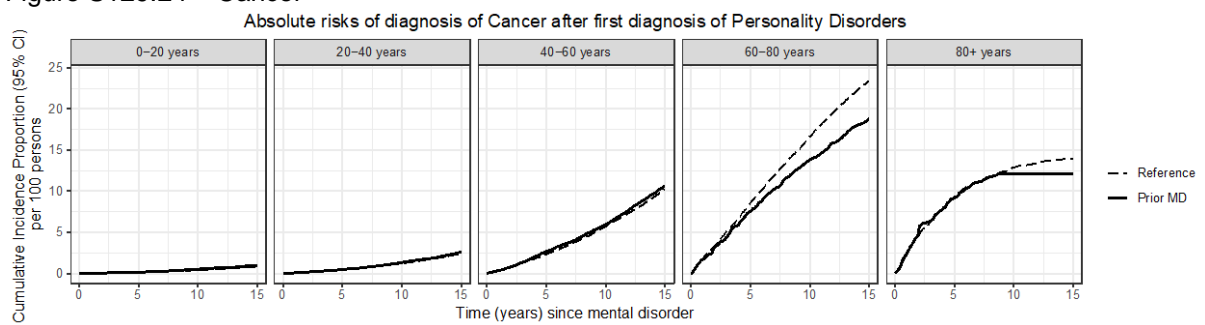

Figure S129.25 – Vision Problems

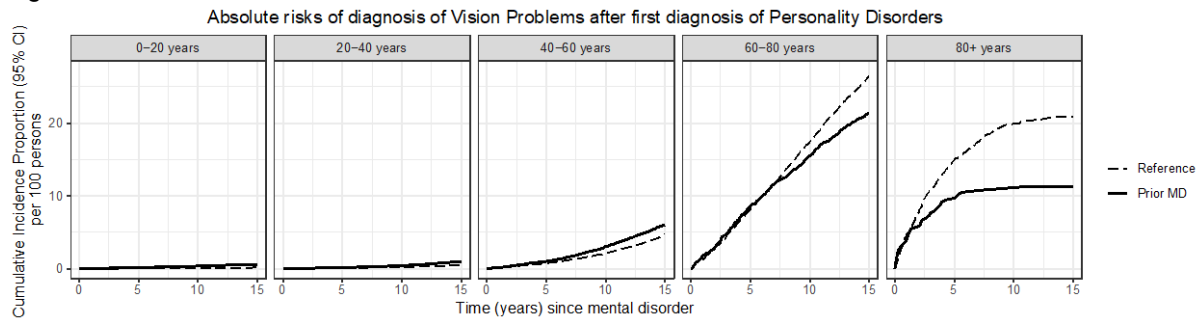

Figure S129.26 – Hearing Problems

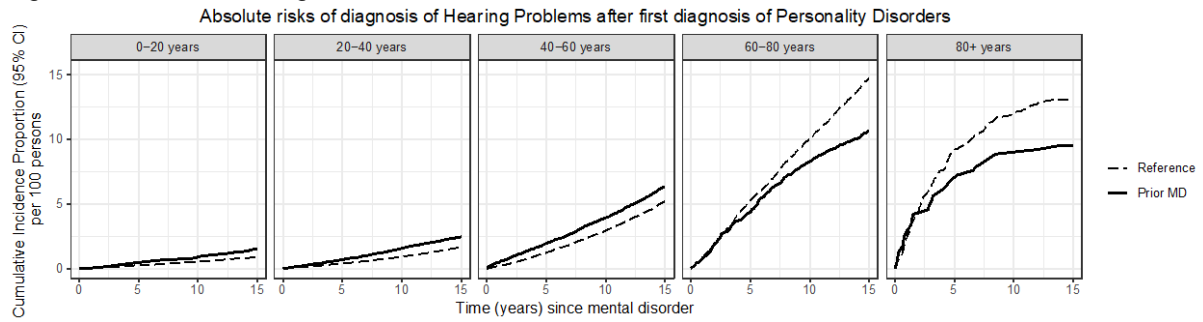

Figure S129.27 – Migraine

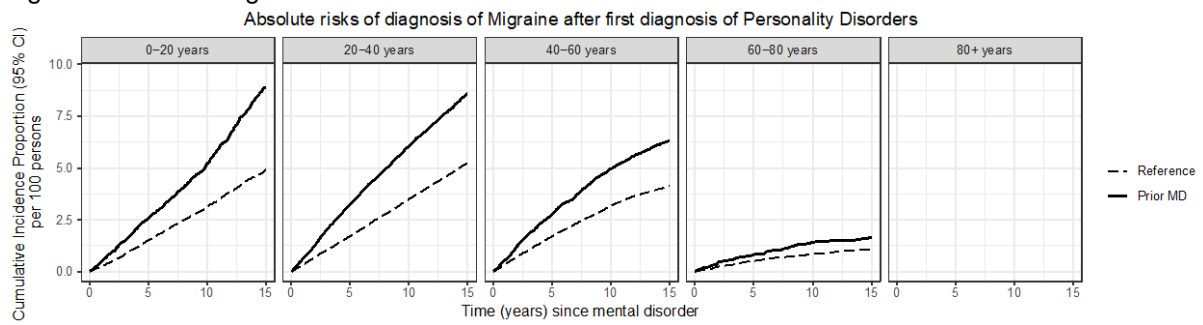

Figure S129.28 – Epilepsy

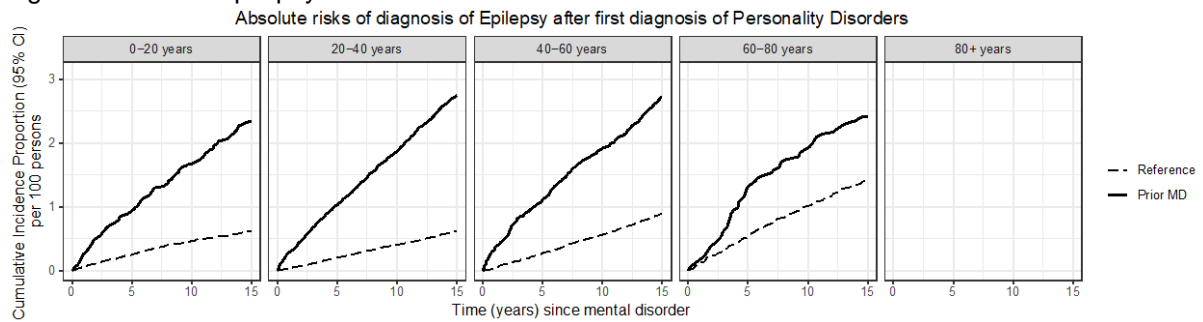

Figure S129.29 – Parkinson's Disease

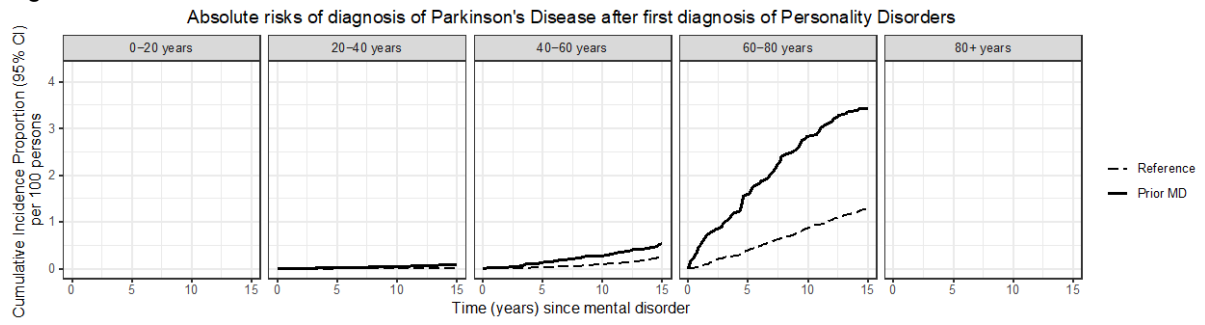

Figure S129.30 – Multiple Sclerosis

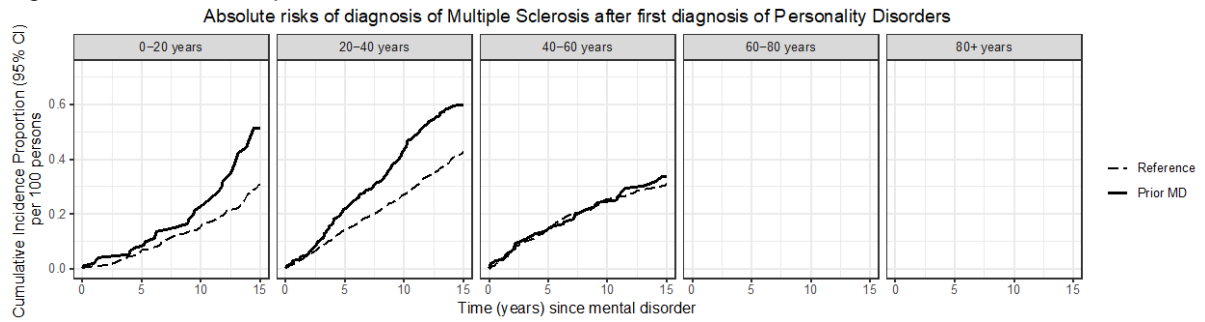

Figure S129.31 – Neuropathies

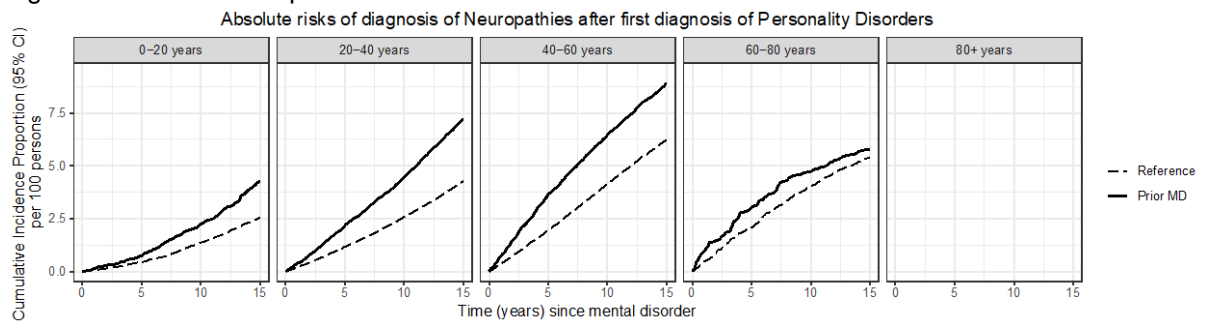



**Figures S130.1-S130.31. Absolute risks of being diagnosed with general medical conditions after a first diagnosis of Intellectual Disabilities.**

**Figure S130.1 - Hypertension**

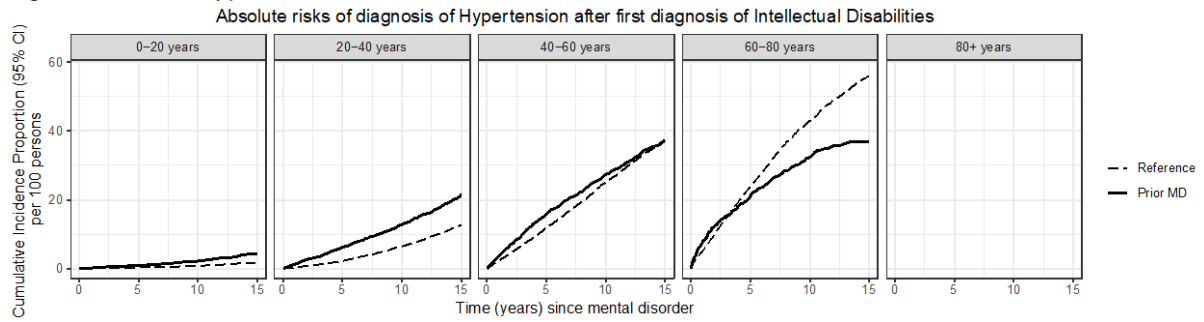

**Figure S130.2 – Dyslipidemia**

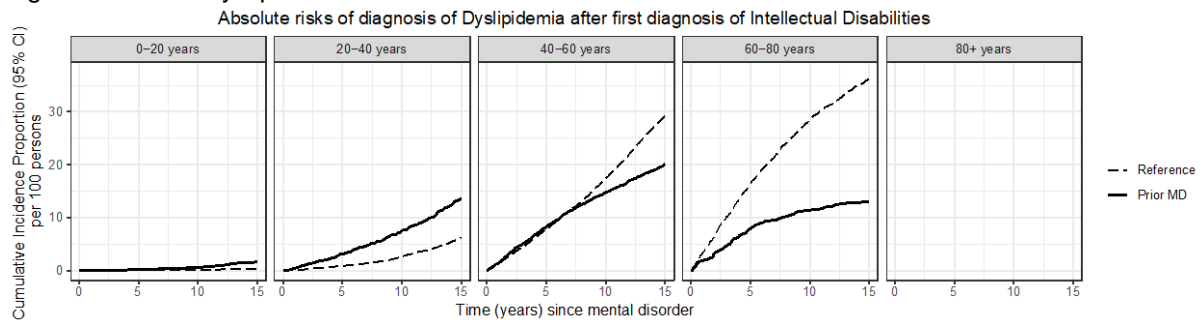

**Figure S130.3 – Ischemic Heart Disease**

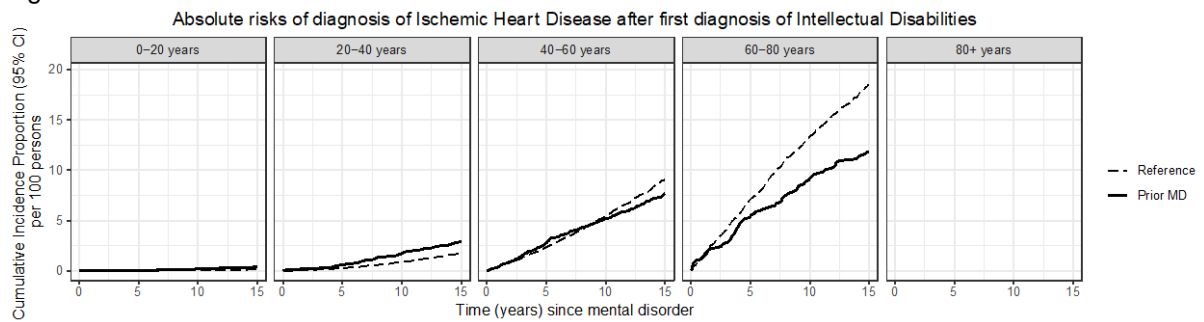

**Figure S130.4 – Atrial Fibrillation**

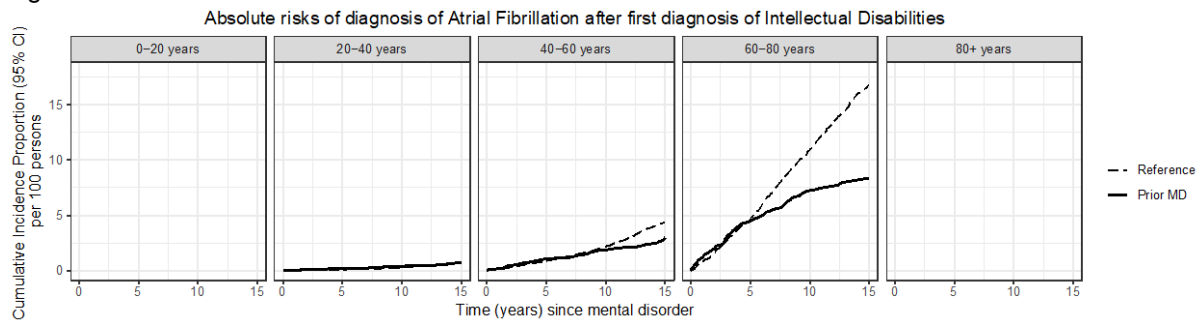

Figure S130.5 – Heart Failure

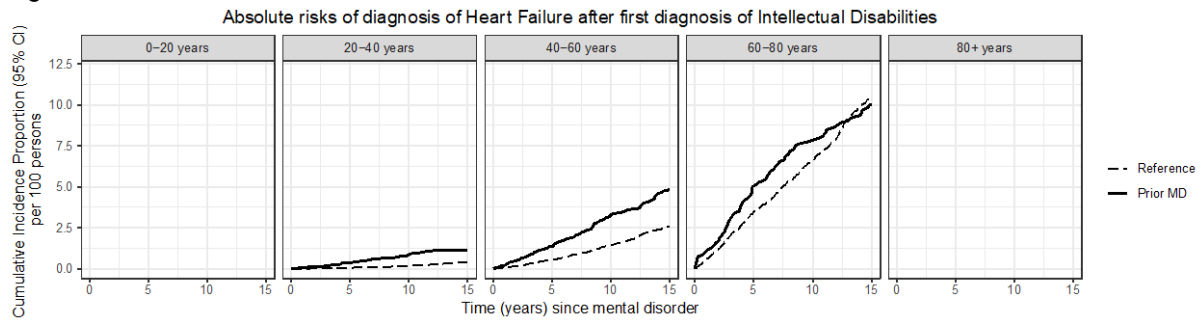

Figure S130.6 – Peripheral Artery Occlusive Disease

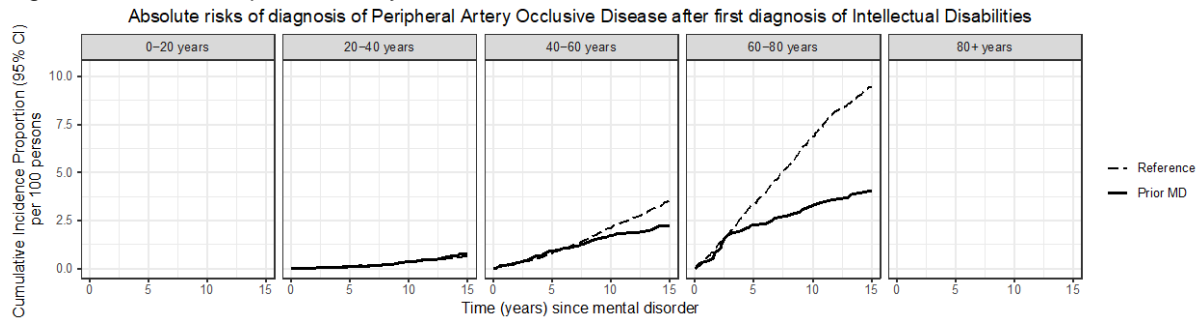

Figure S130.7 – Stroke

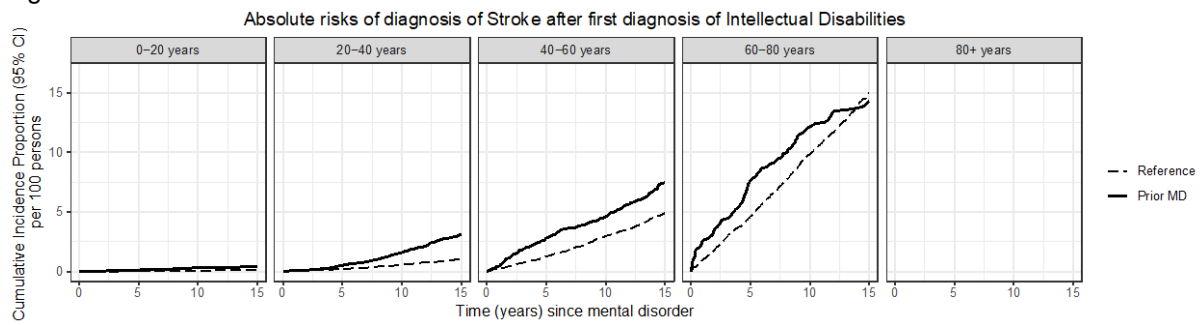

Figure S130.8 – Diabetes Mellitus

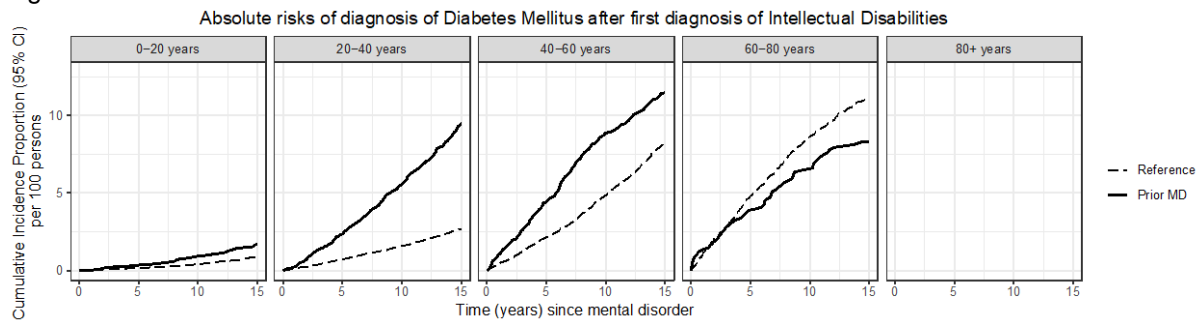

Figure S130.9 – Thyroid Disorders

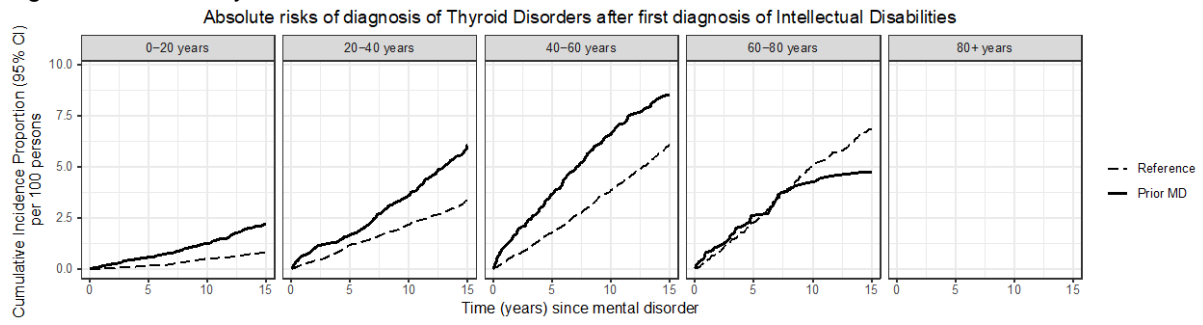

Figure S130.10 – Gout

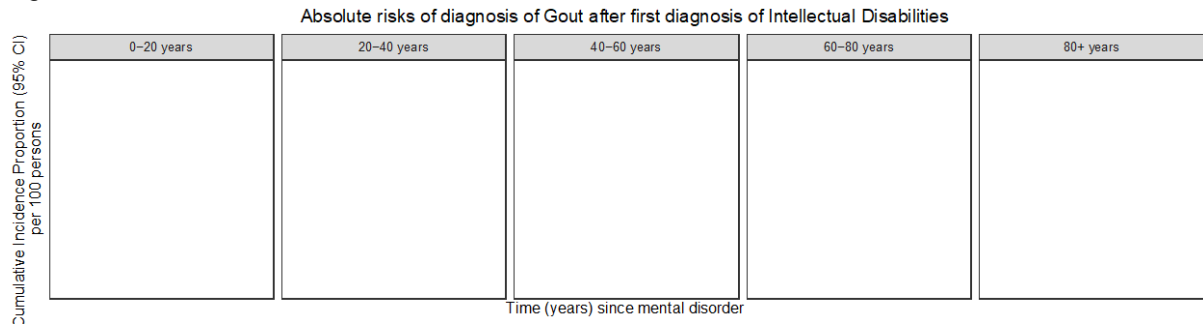

Figure S130.11 – Chronic Pulmonary Disease

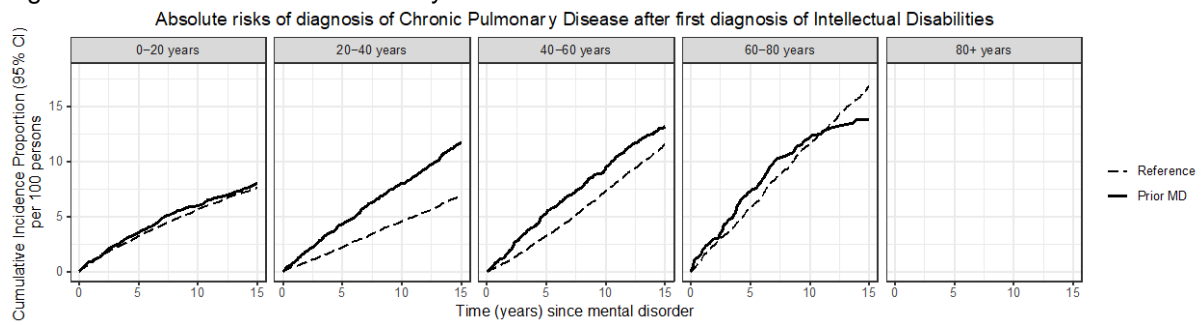

Figure S130.12 – Allergy

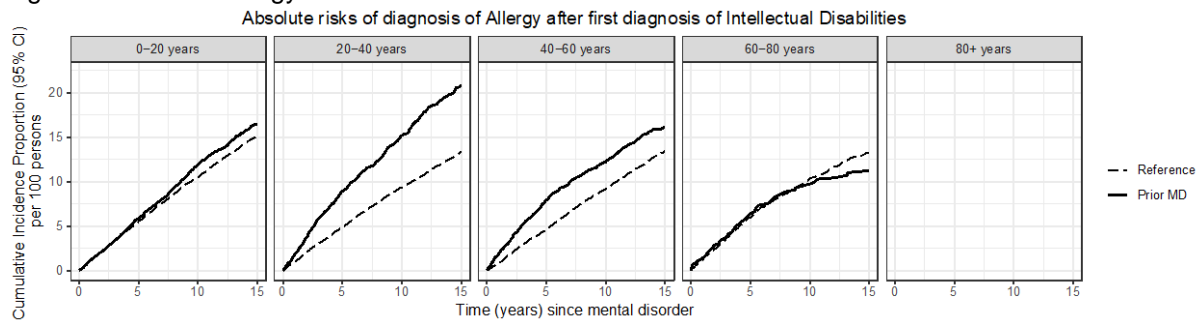

Figure S130.13 – Ulcer/Chronic Gastritis

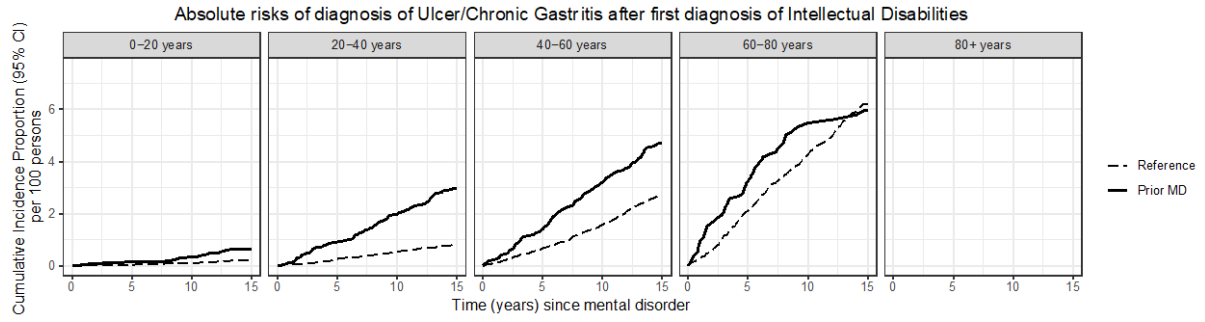

Figure S130.14 – Chronic Liver Disease

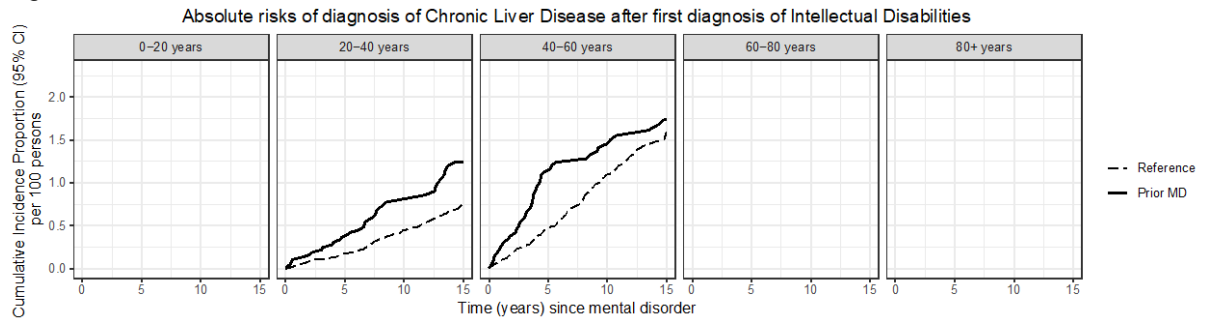

Figure S130.15 – Inflammatory Bowel Disease

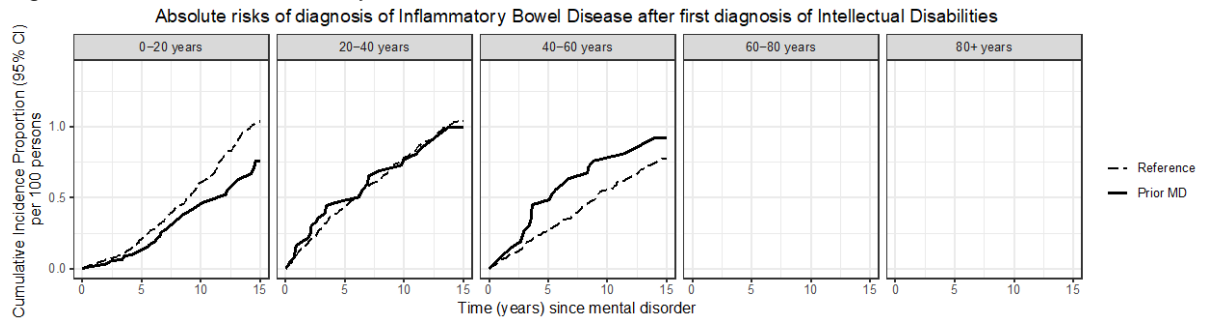

Figure S130.16 – Diverticular Disease of the Intestine

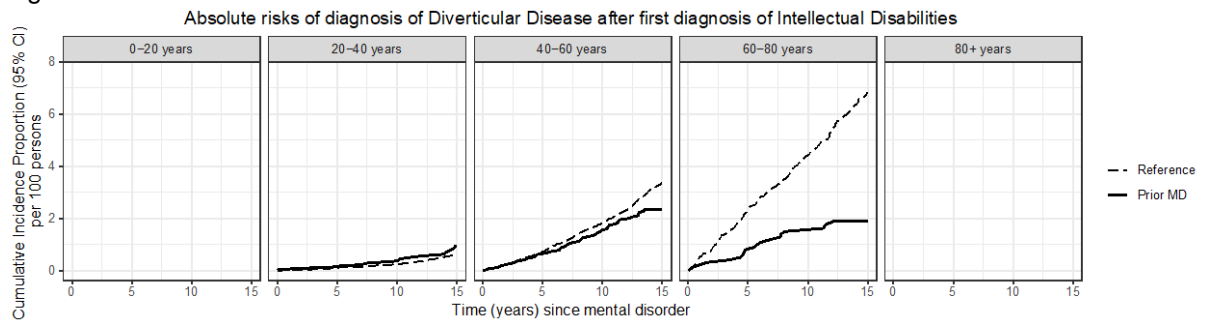

Figure S130.17 – Chronic Kidney Disease

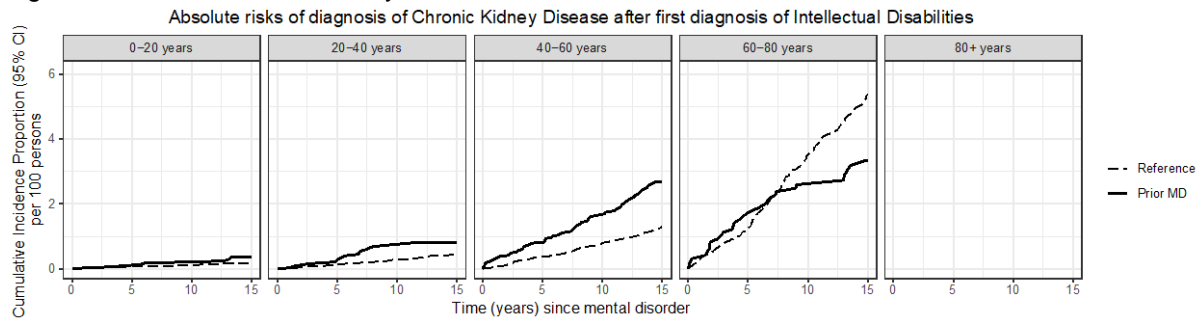

Figure S130.18 – Prostate Disorders

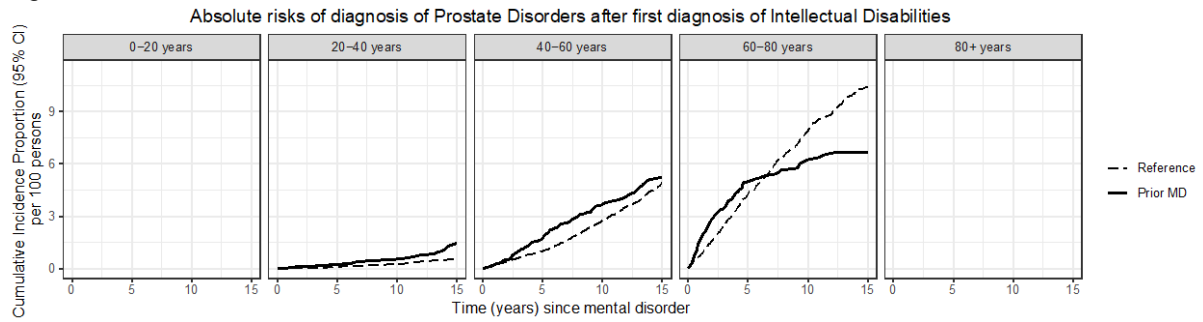

Figure S130.19 – Connective Tissue Disorders

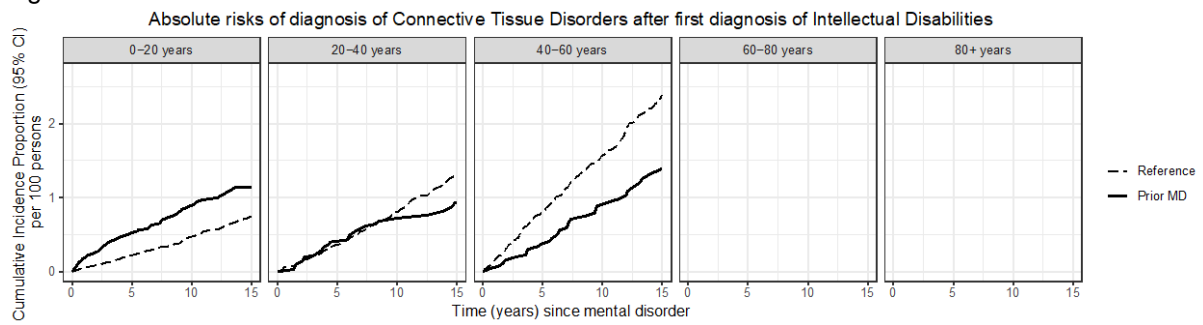

Figure S130.20 – Osteoporosis

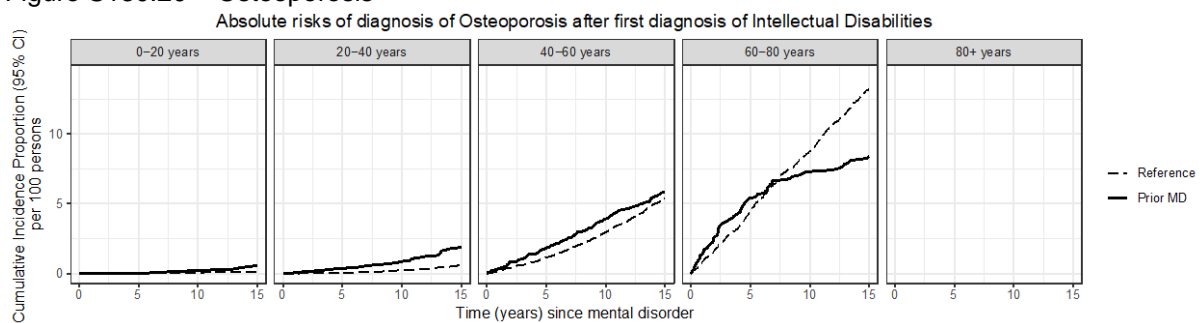

Figure S130.21 – Painful Conditions

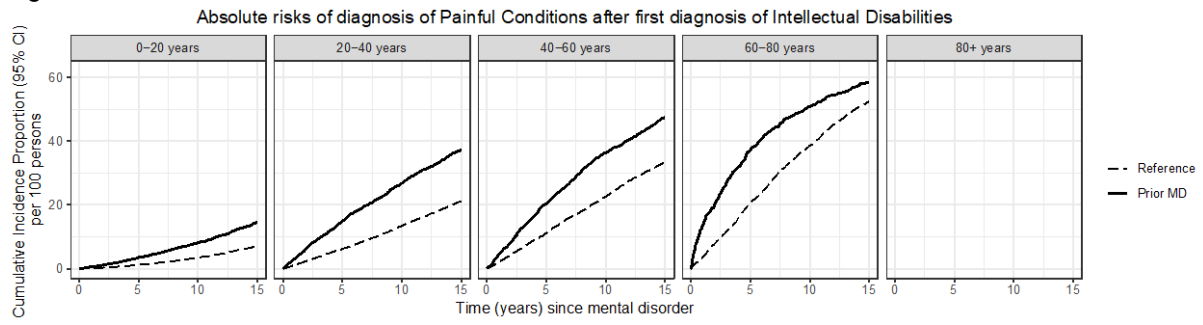

Figure S130.22 – HIV/AIDS

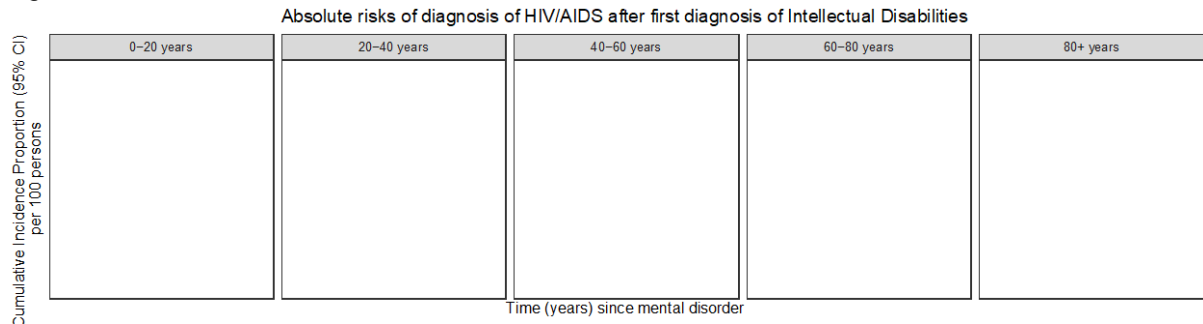

Figure S130.23 – Anemias

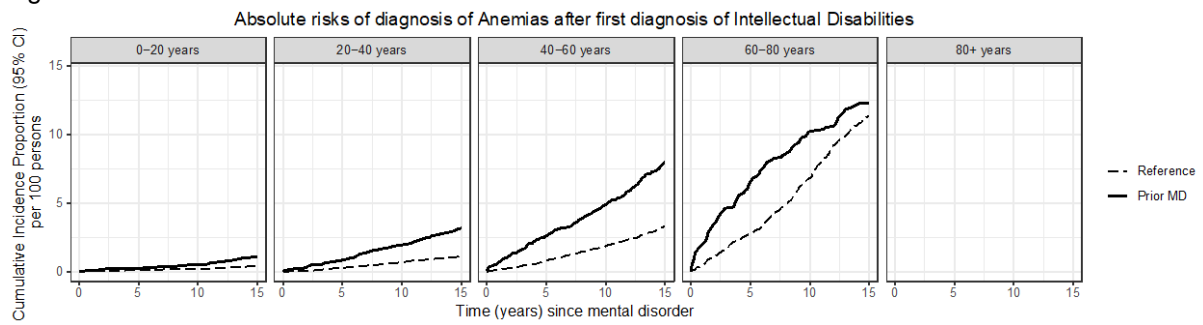

Figure S130.24 – Cancer

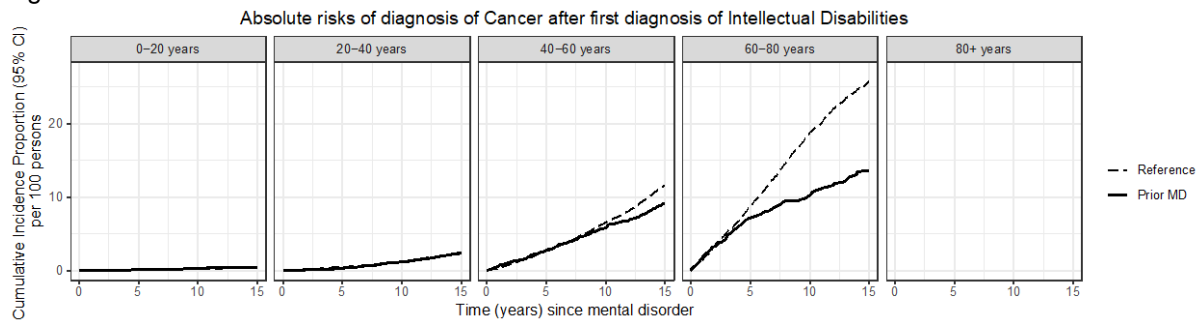

Figure S130.25 – Vision Problems

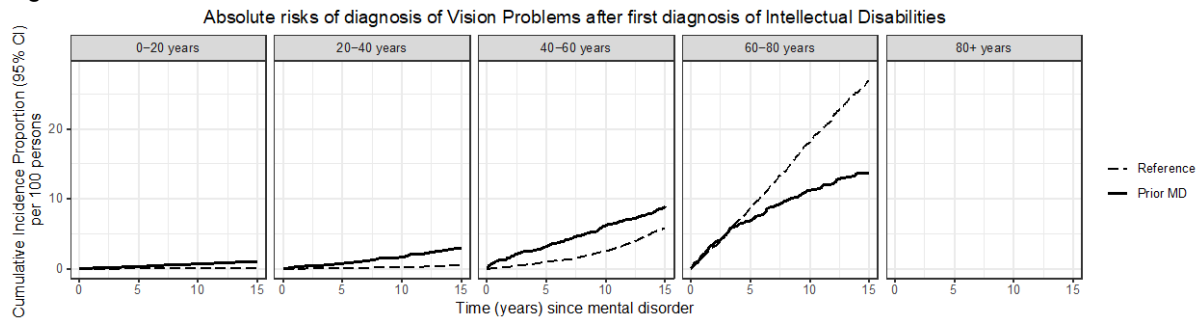

Figure S130.26 – Hearing Problems

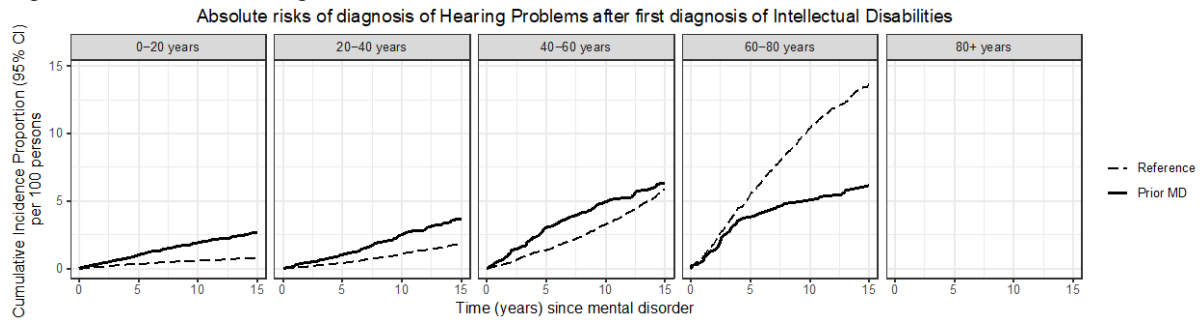

Figure S130.27 – Migraine

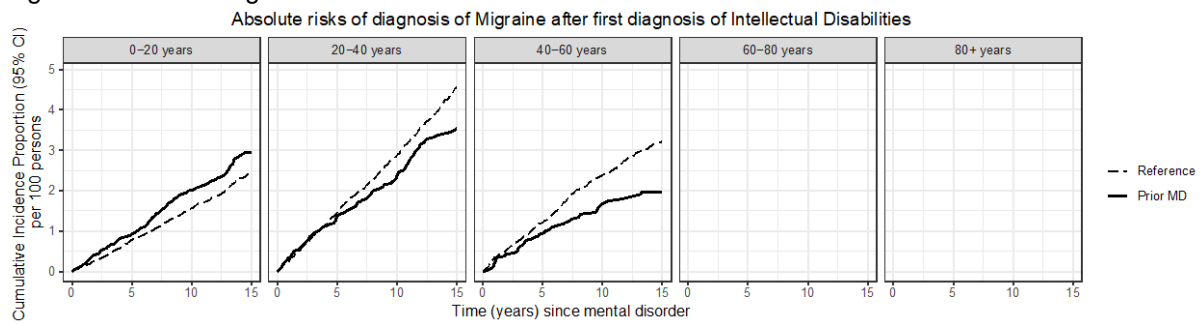

Figure S130.28 – Epilepsy

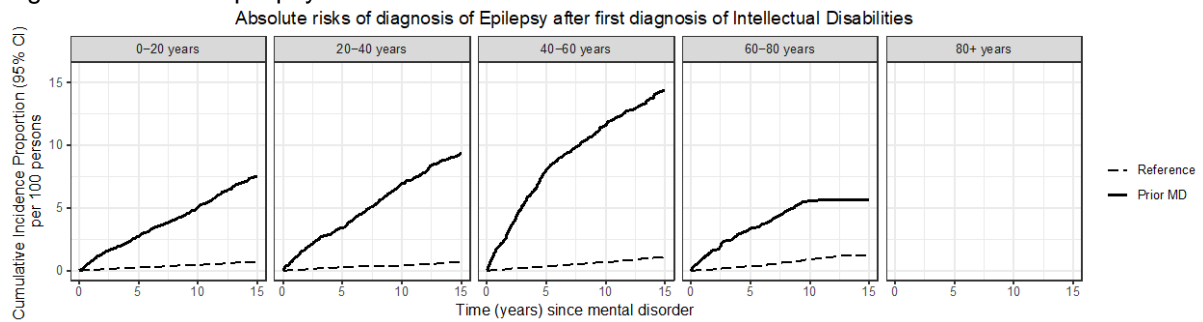

Figure S130.29 – Parkinson's Disease

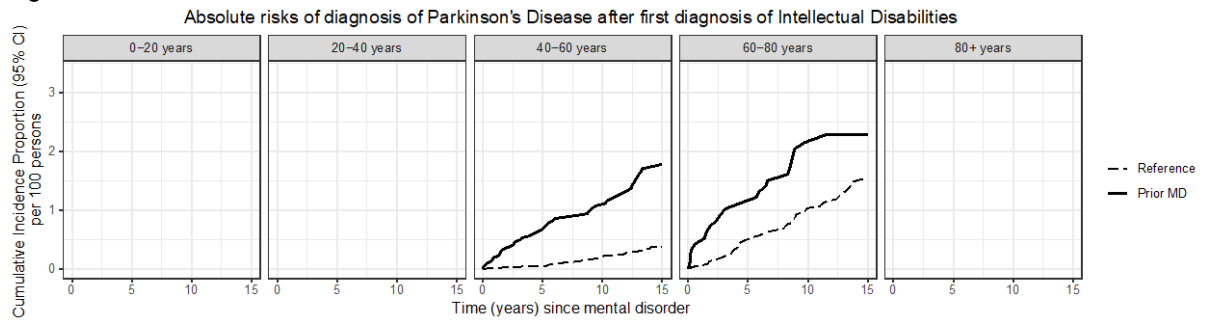

Figure S130.30 – Multiple Sclerosis

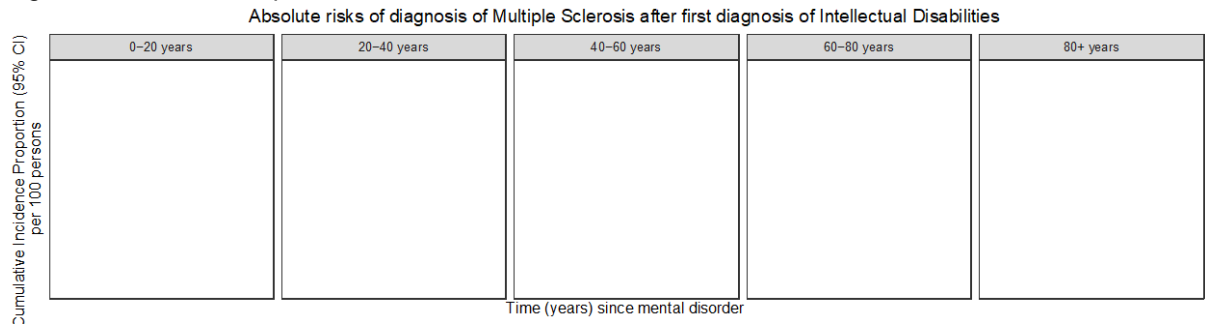

Figure S130.31 – Neuropathies

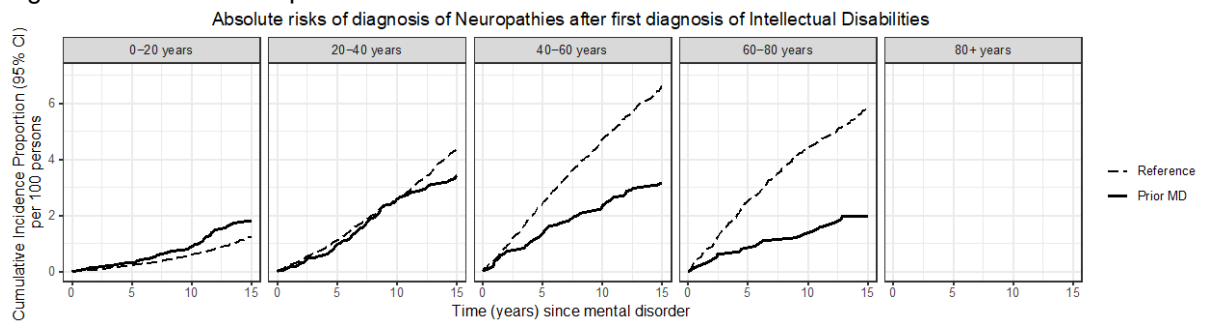



**Figures S131.1-S131.31. Absolute risks of being diagnosed with general medical conditions after a first diagnosis of Developmental Disorders**

**Figure S131.1 - Hypertension**

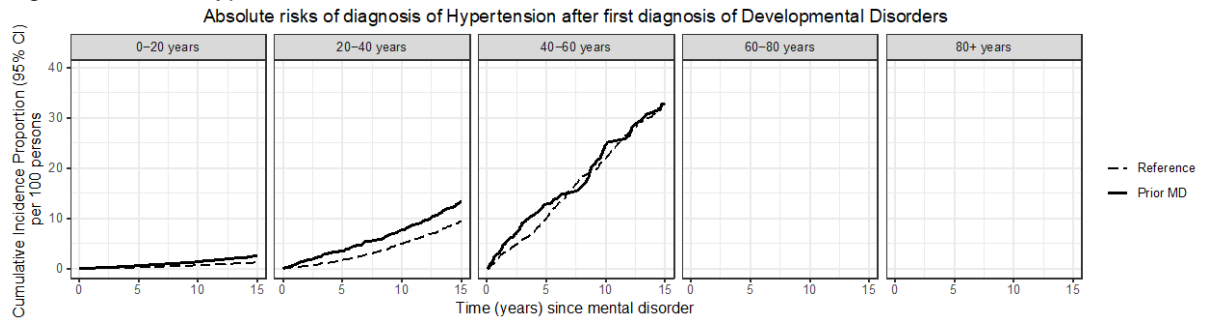

**Figure S131.2 – Dyslipidemia**

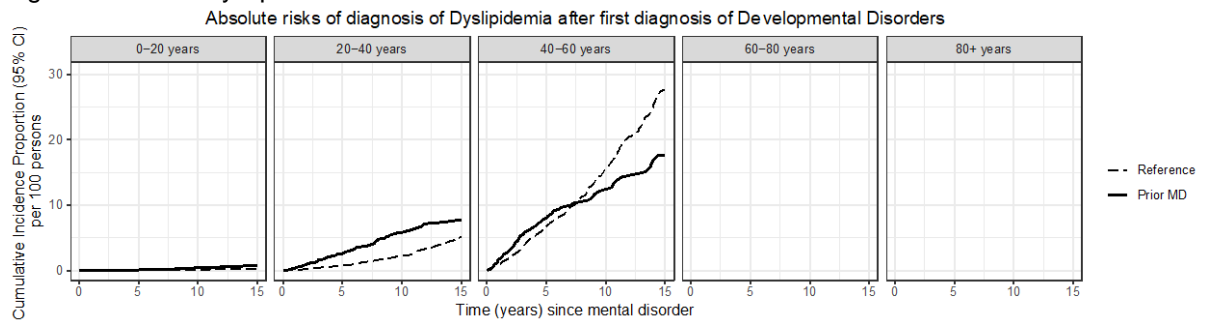

**Figure S131.3 – Ischemic Heart Disease**

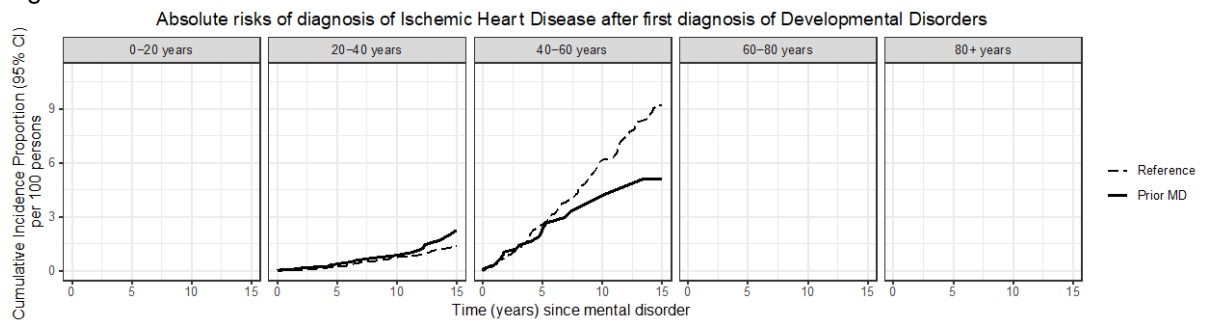

**Figure S131.4 – Atrial Fibrillation**

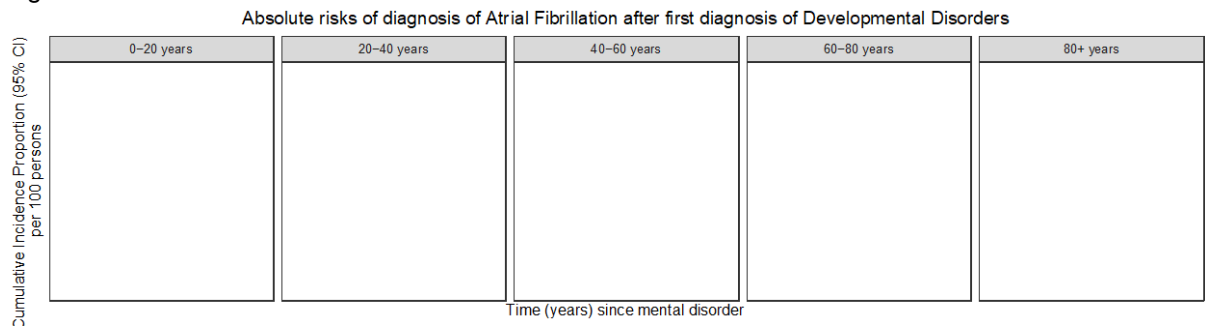

Figure S131.5 – Heart Failure

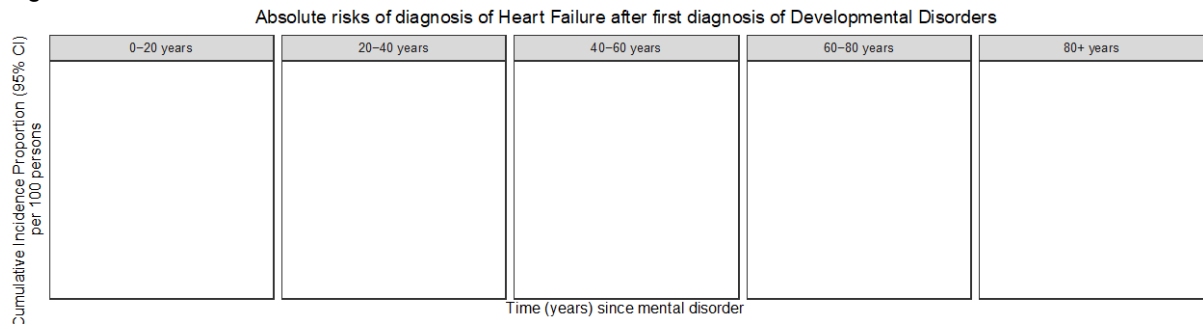

Figure S131.6 – Peripheral Artery Occlusive Disease

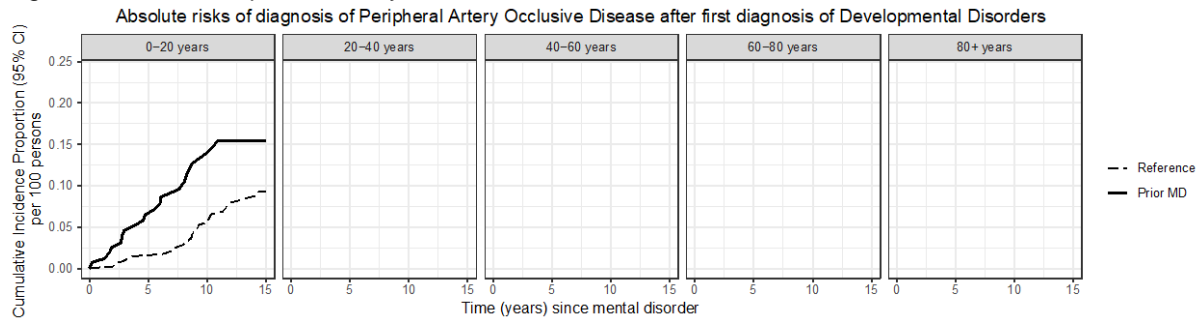

Figure S131.7 – Stroke

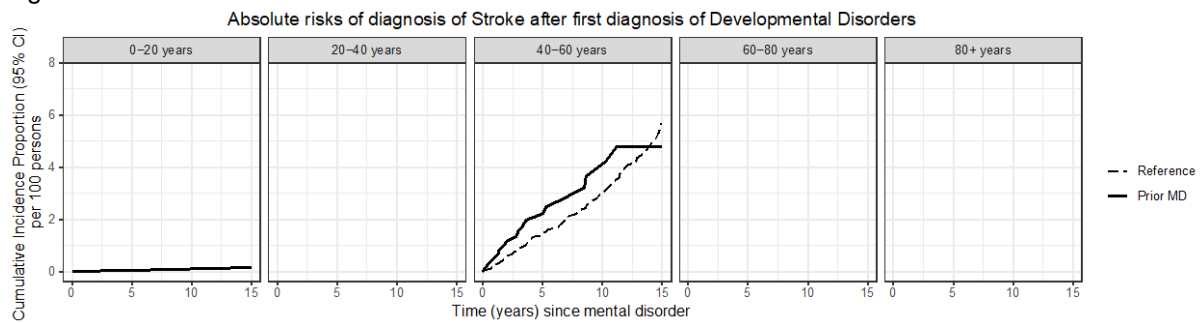

Figure S131.8 – Diabetes Mellitus

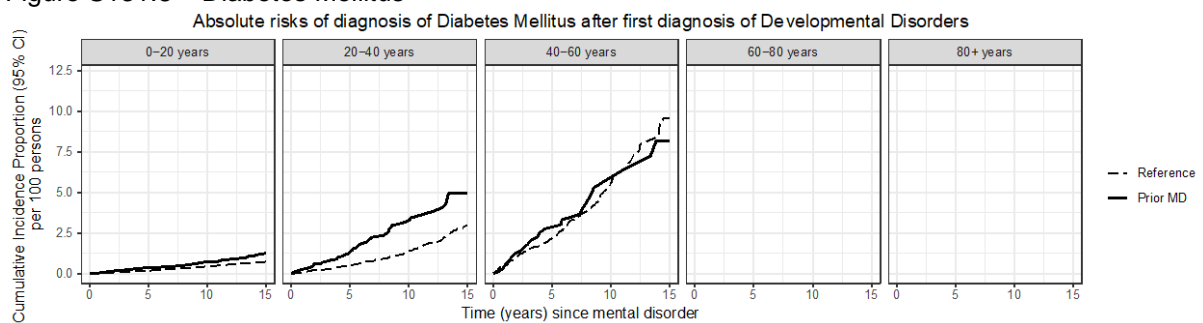

Figure S131.9 – Thyroid Disorders

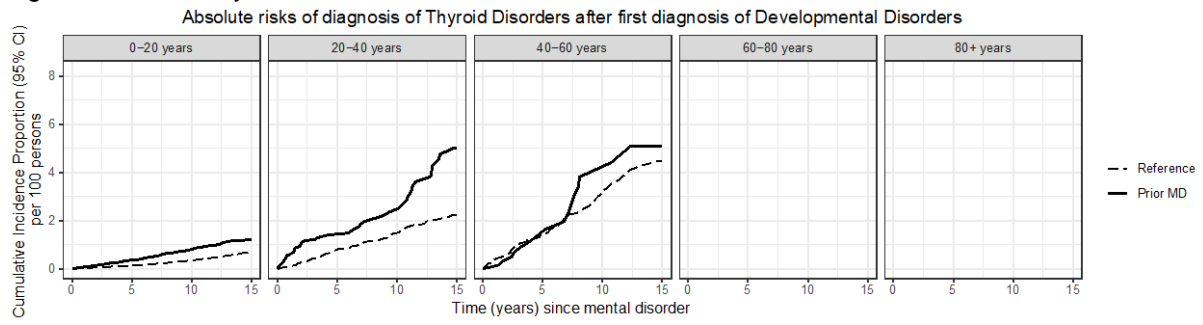

Figure S131.10 – Gout

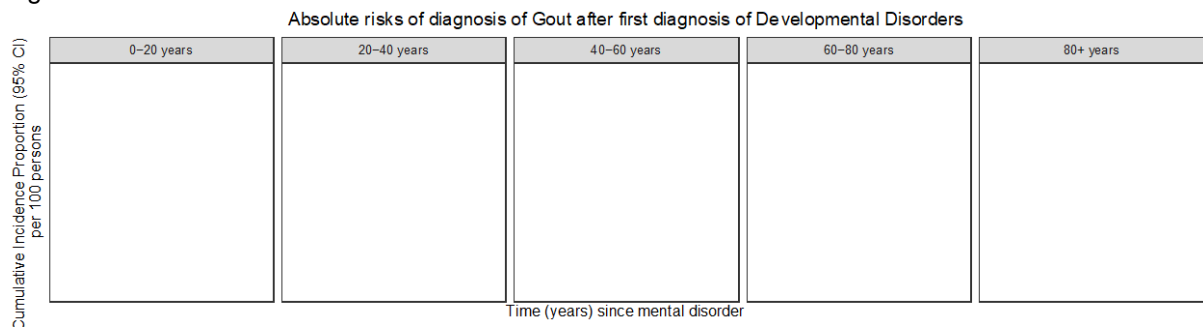

Figure S131.11 – Chronic Pulmonary Disease

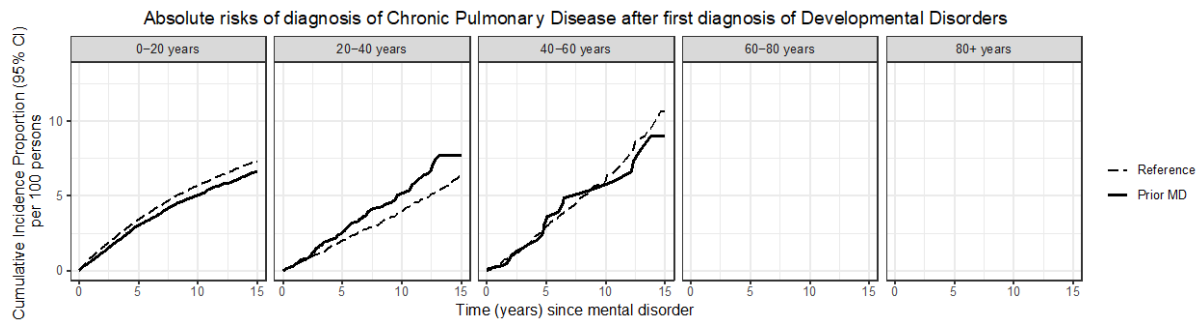

Figure S131.12 – Allergy

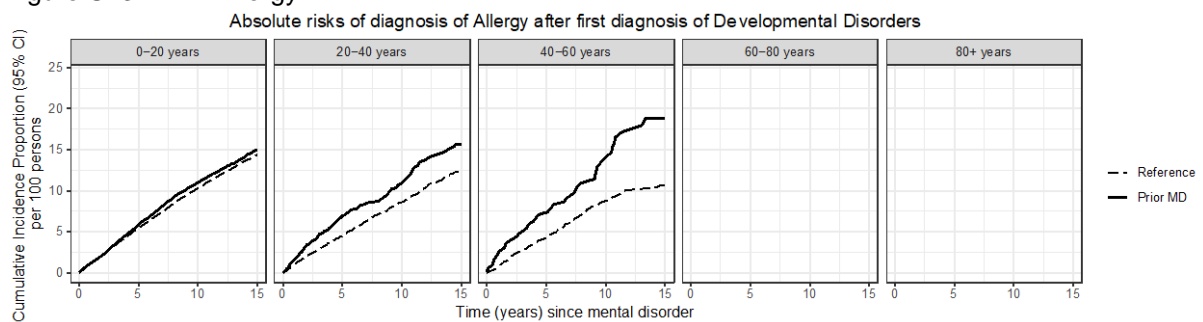

Figure S131.13 – Ulcer/Chronic Gastritis

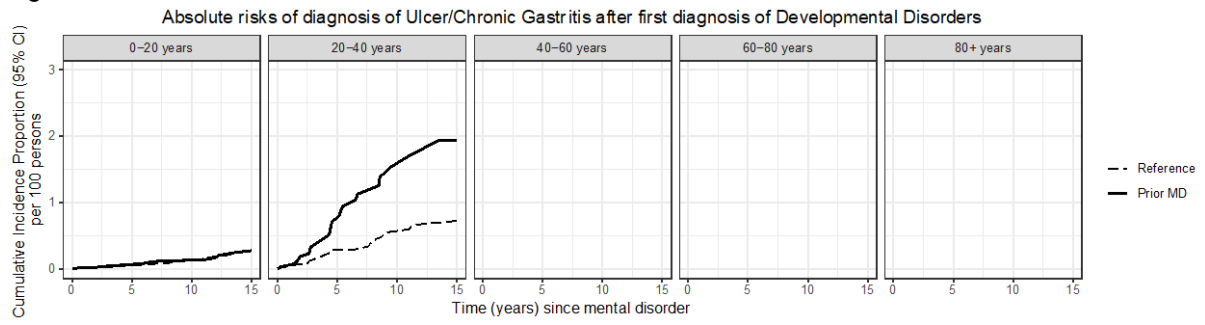

Figure S131.14 – Chronic Liver Disease

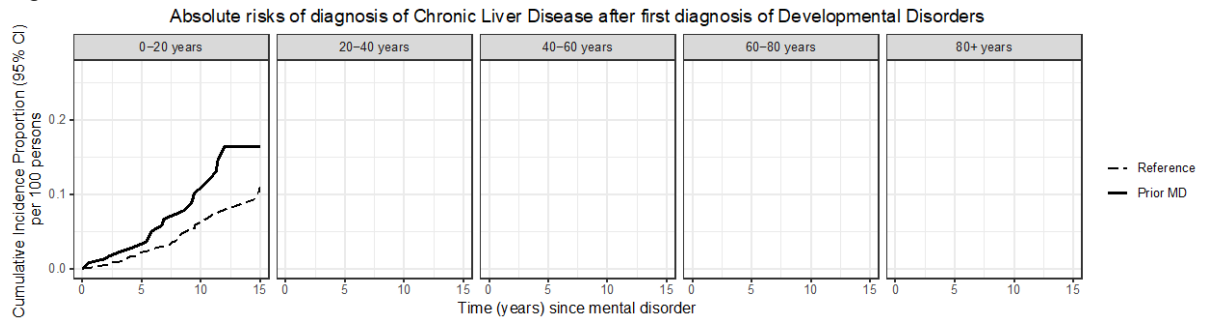

Figure S131.15 – Inflammatory Bowel Disease

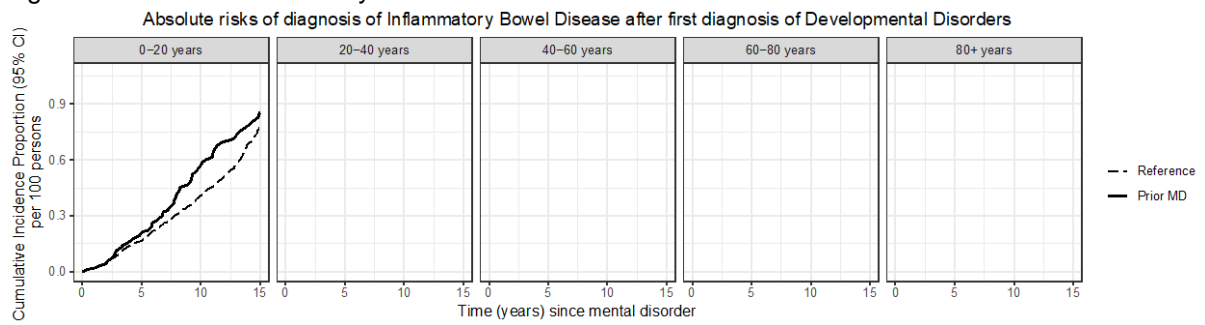

Figure S131.16 – Diverticular Disease of the Intestine

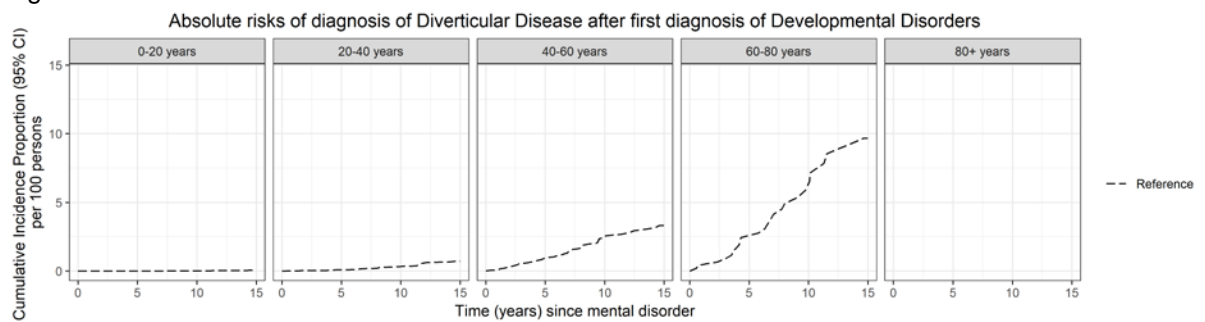

Figure S131.17 – Chronic Kidney Disease

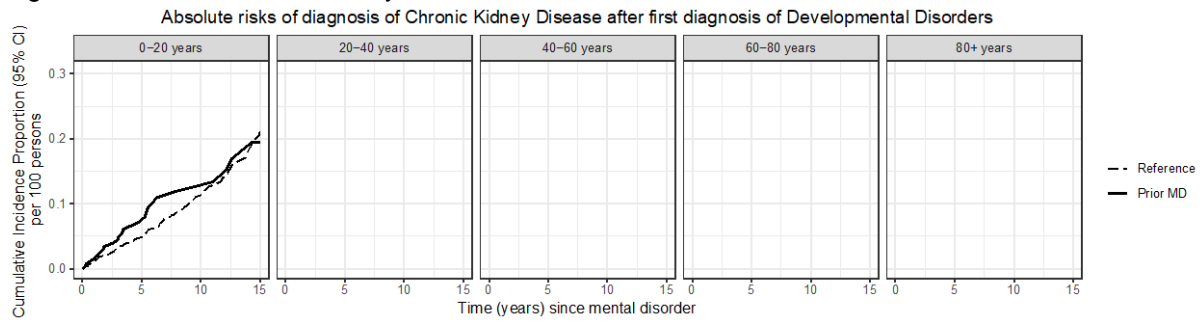

Figure S131.18 – Prostate Disorders

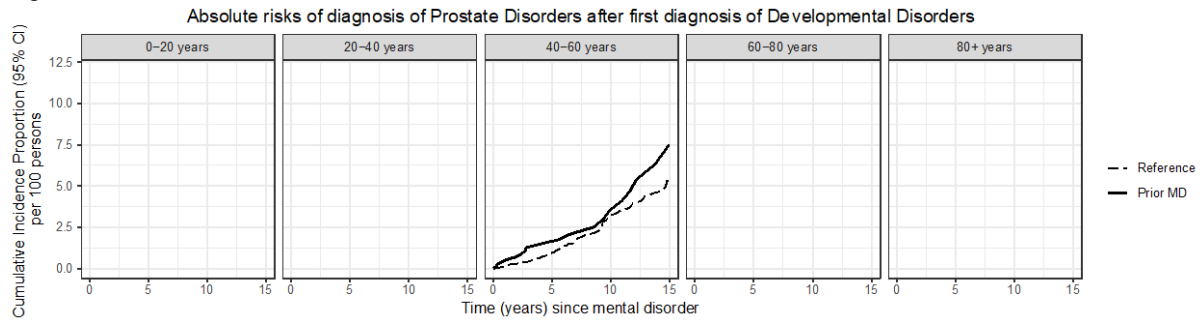

Figure S131.19 – Connective Tissue Disorders

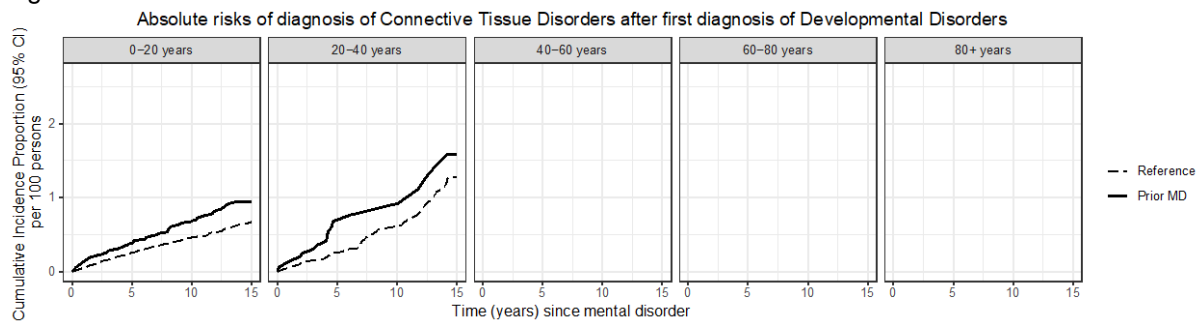

Figure S131.20 – Osteoporosis

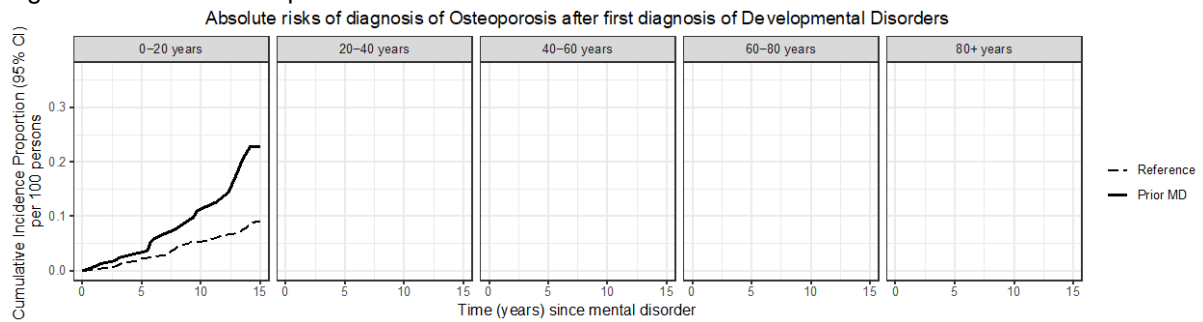

Figure S131.21 – Painful Conditions

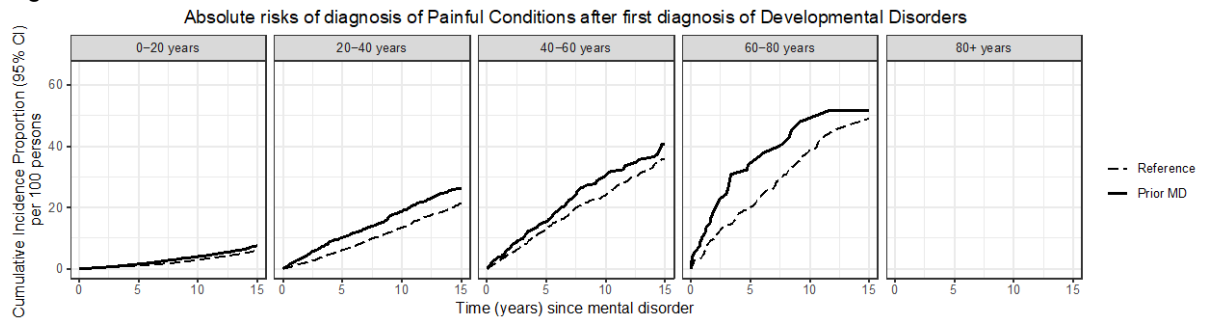

Figure S131.22 – HIV/AIDS

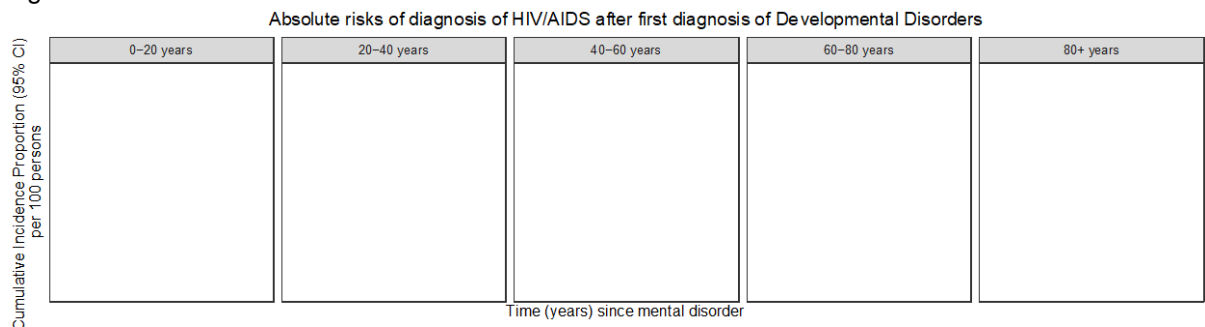

Figure S131.23 – Anemias

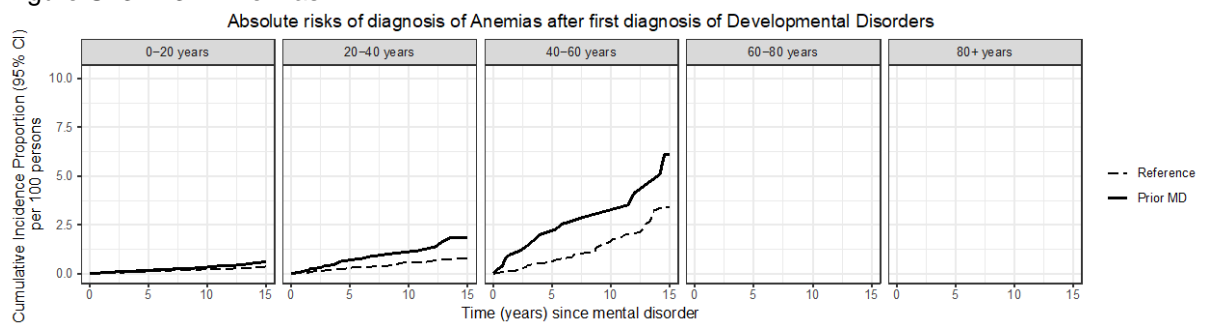

Figure S131.24 – Cancer

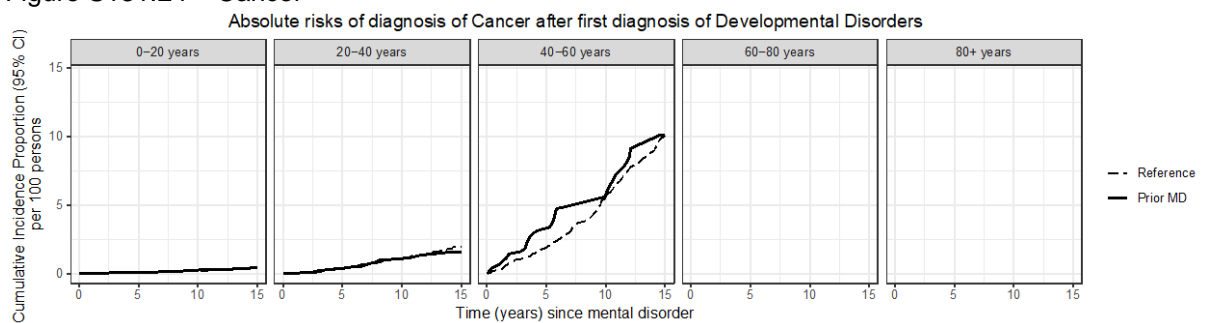

Figure S131.25 – Vision Problems

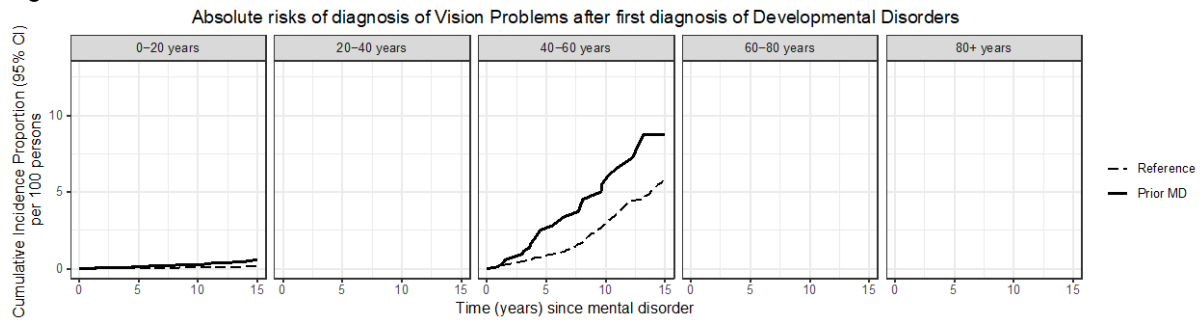

Figure S131.26 – Hearing Problems

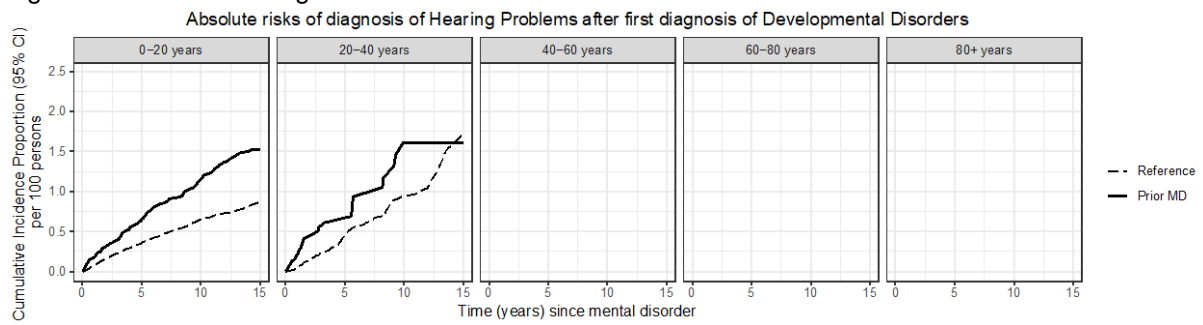

Figure S131.27 – Migraine

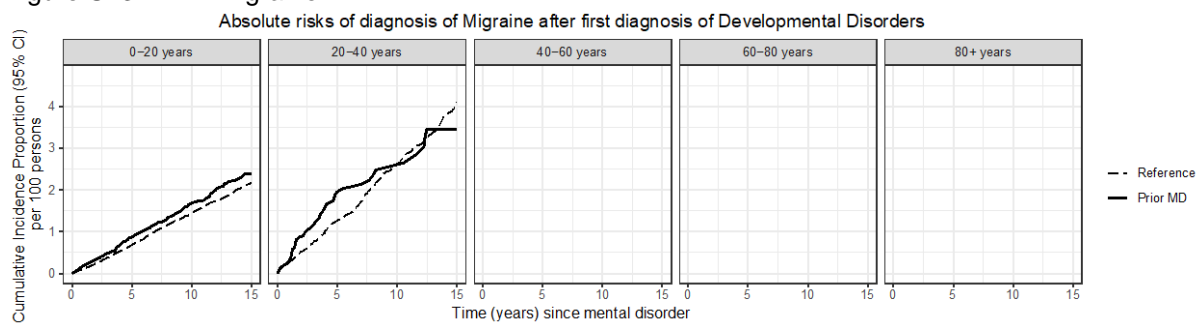

Figure S131.28 – Epilepsy

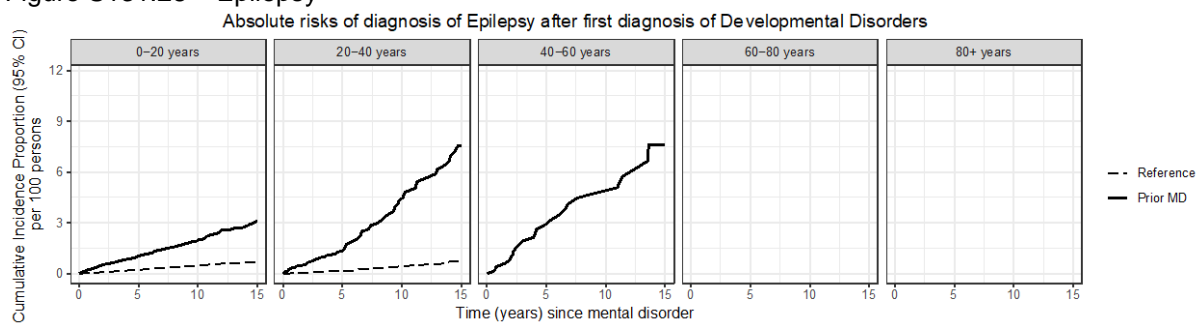

Figure S131.29 – Parkinson's Disease

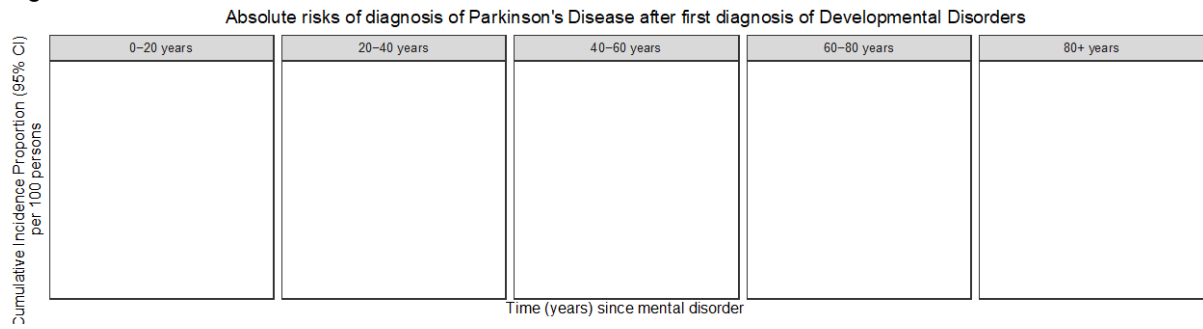

Figure S131.30 – Multiple Sclerosis

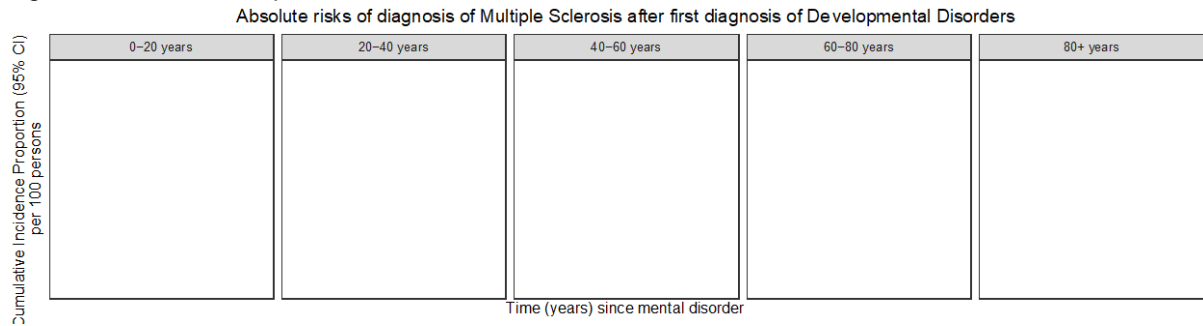

Figure S131.31 – Neuropathies

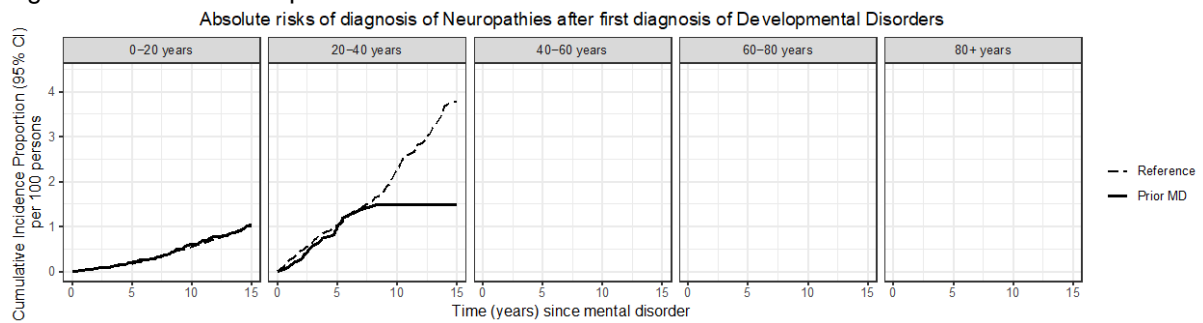



**Figures S132.1-S132.31. Absolute risks of being diagnosed with general medical conditions after a first diagnosis of Behavioral Disorders**

**Figure S132.1 - Hypertension**

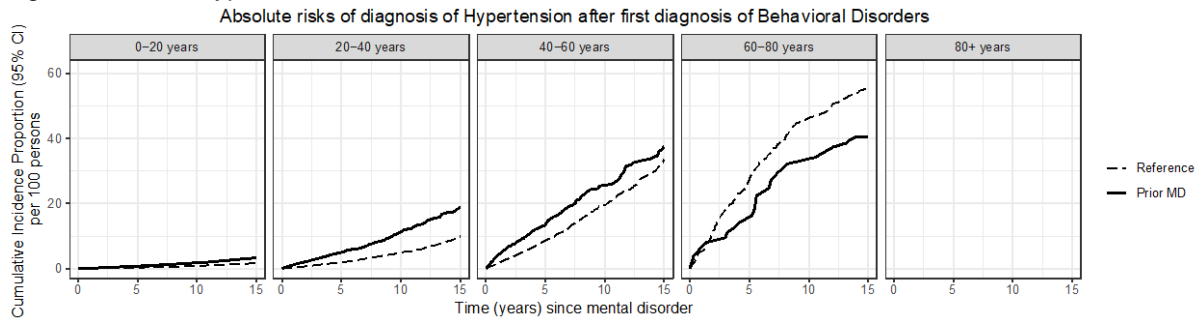

**Figure S132.2 – Dyslipidemia**

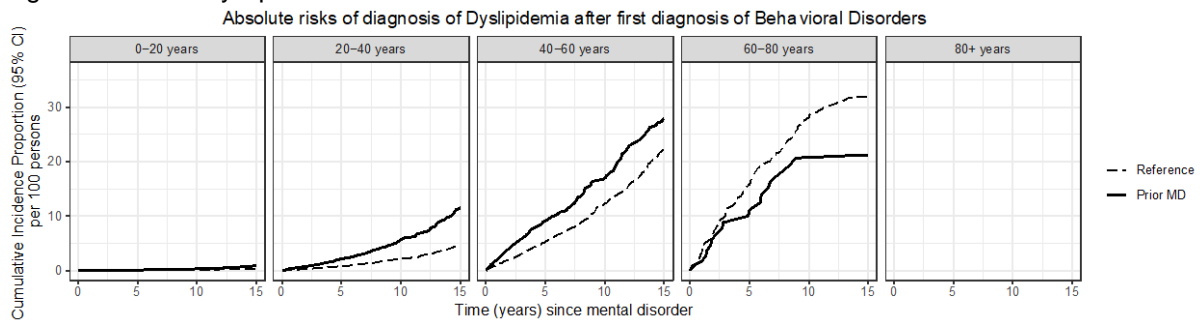

**Figure S132.3 – Ischemic Heart Disease**

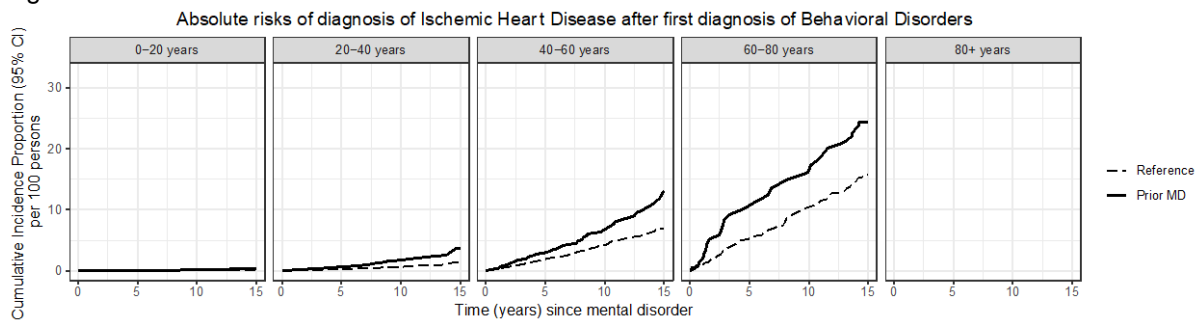

**Figure S132.4 – Atrial Fibrillation**

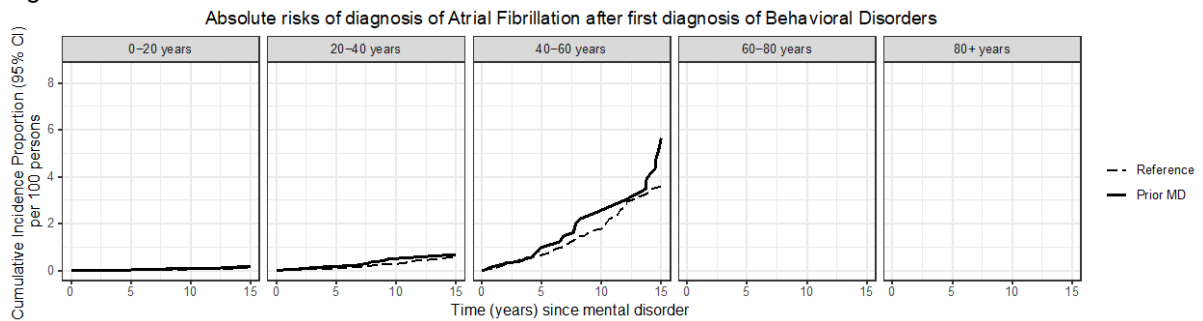

Figure S132.5 – Heart Failure

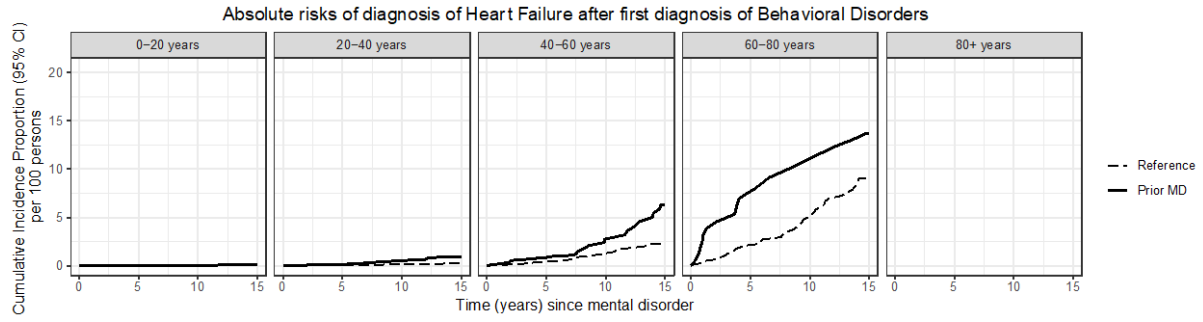

Figure S132.6 – Peripheral Artery Occlusive Disease

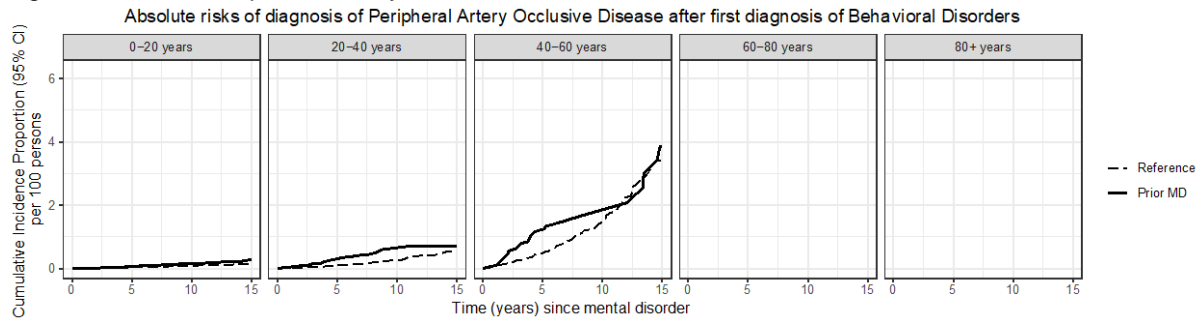

Figure S132.7 – Stroke

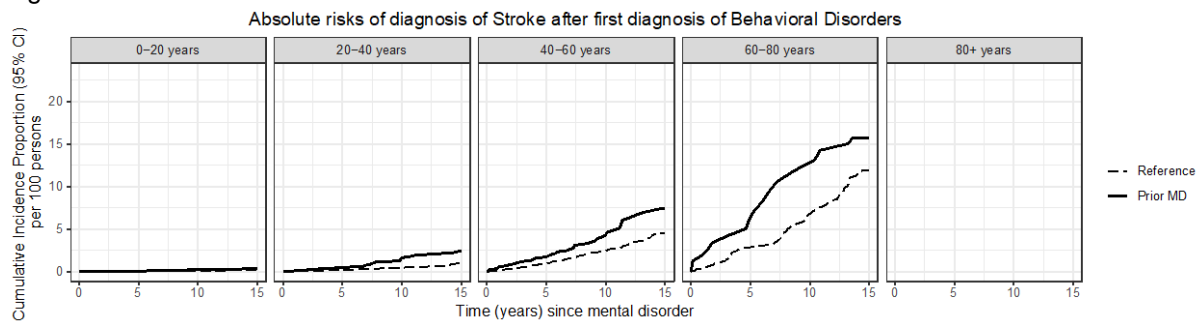

Figure S132.8 – Diabetes Mellitus

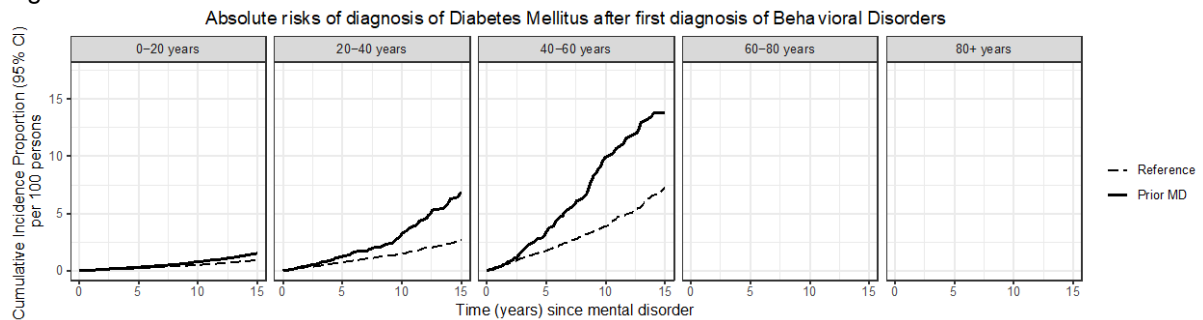

Figure S132.9 – Thyroid Disorders

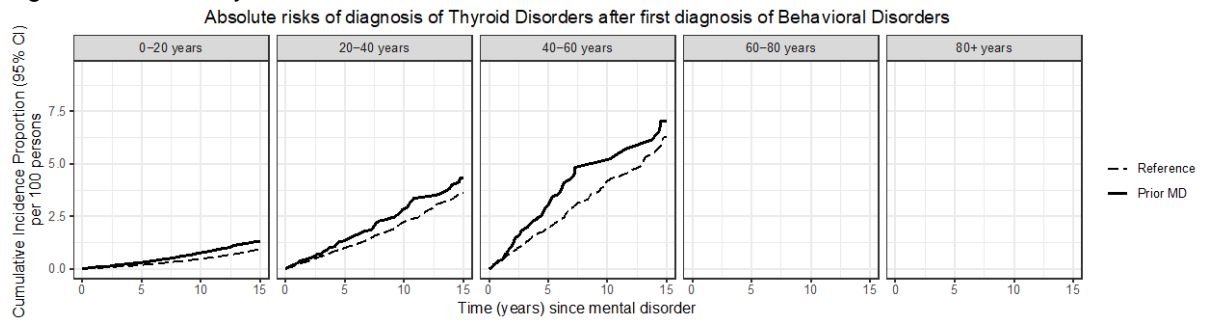

Figure S132.10 – Gout

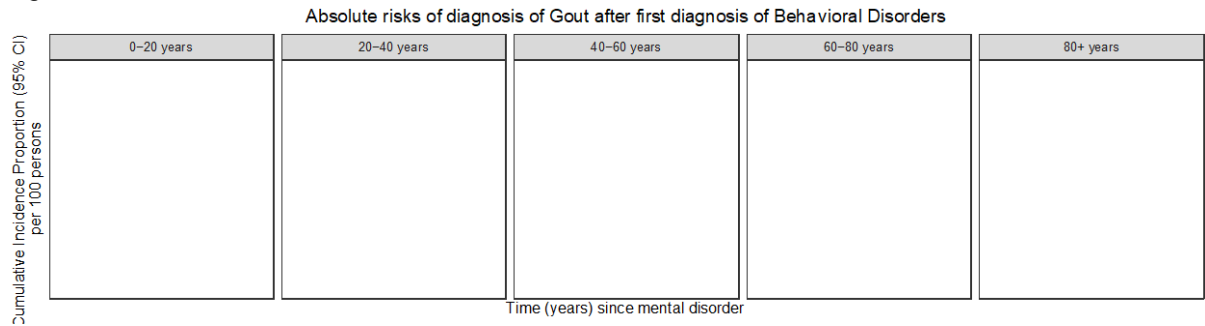

Figure S132.11 – Chronic Pulmonary Disease

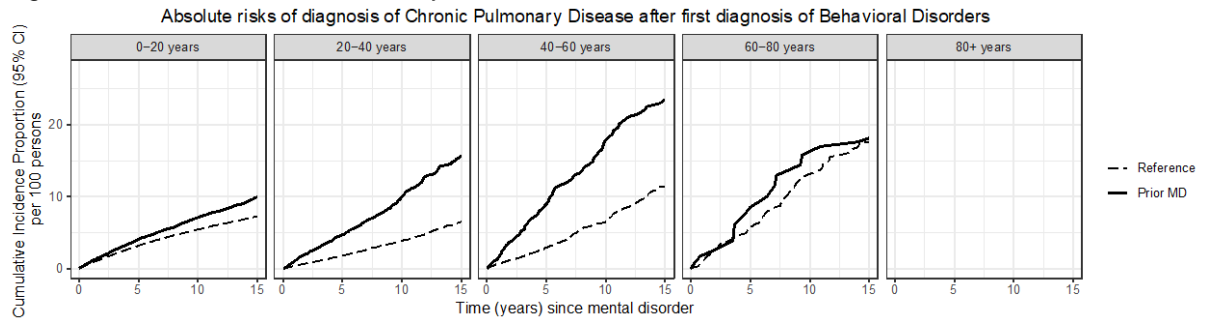

Figure S132.12 – Allergy

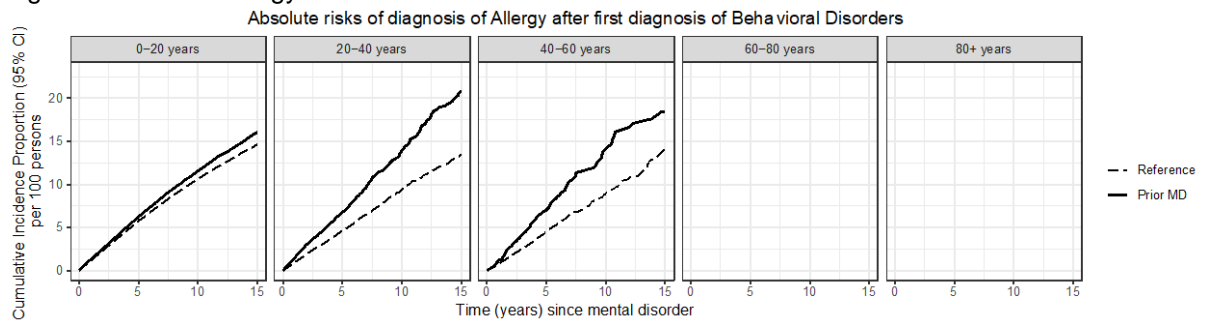

Figure S132.13 – Ulcer/Chronic Gastritis

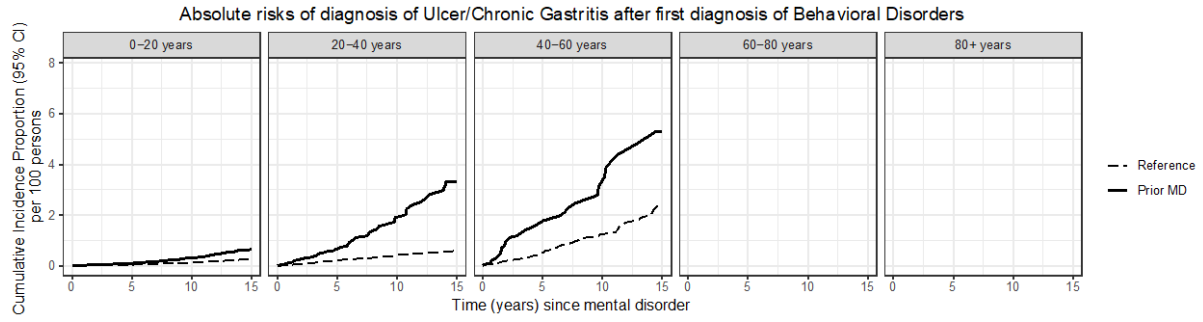

Figure S132.14 – Chronic Liver Disease

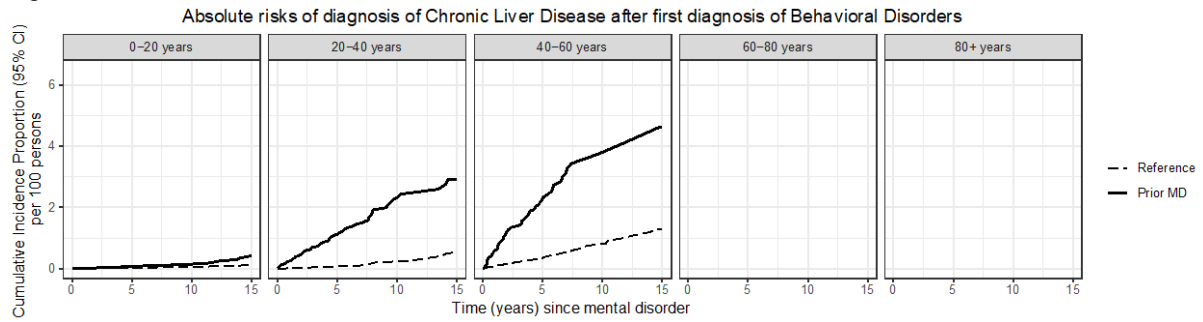

Figure S132.15 – Inflammatory Bowel Disease

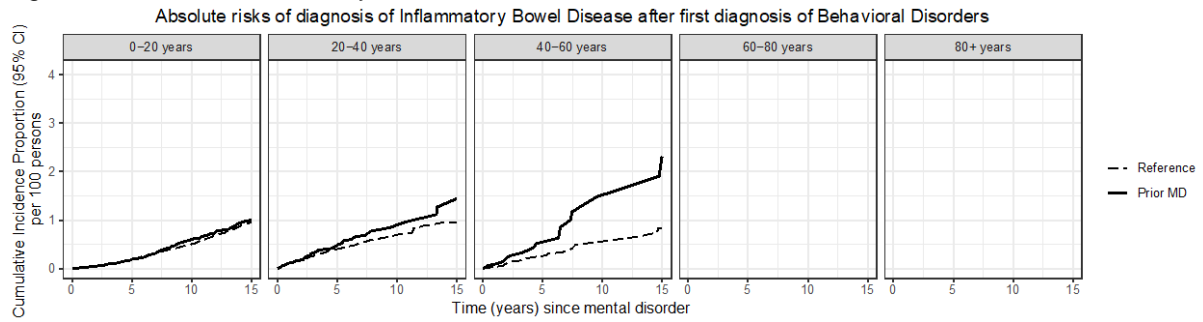

Figure S132.16 – Diverticular Disease of the Intestine

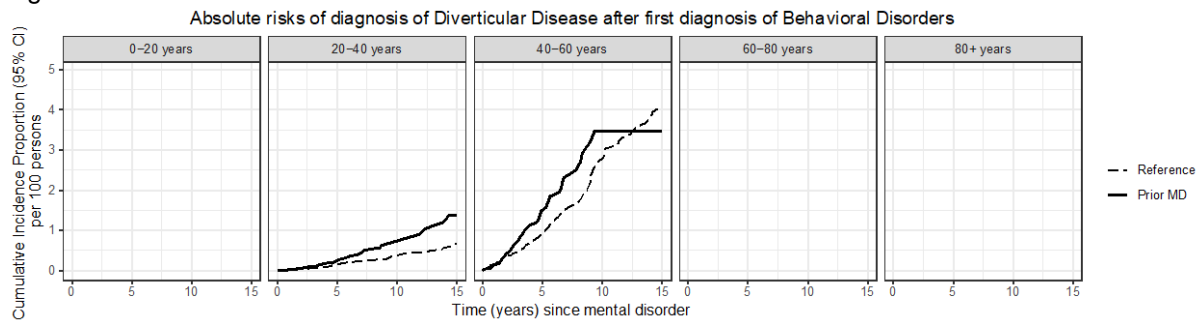

Figure S132.17 – Chronic Kidney Disease

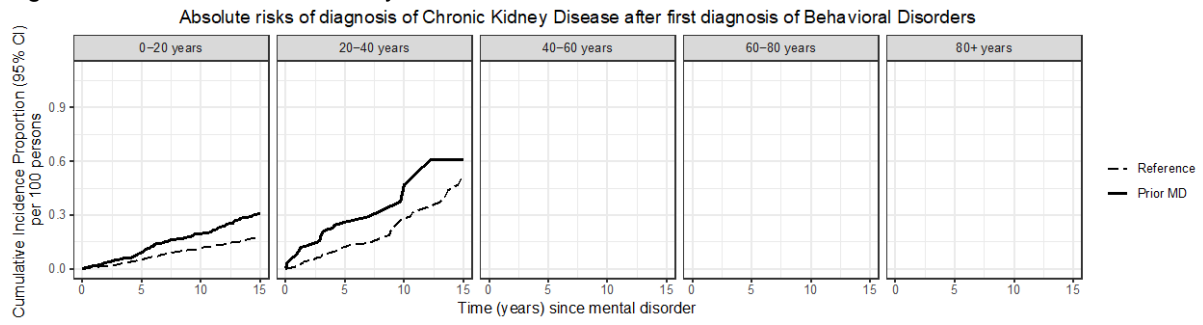

Figure S132.18 – Prostate Disorders

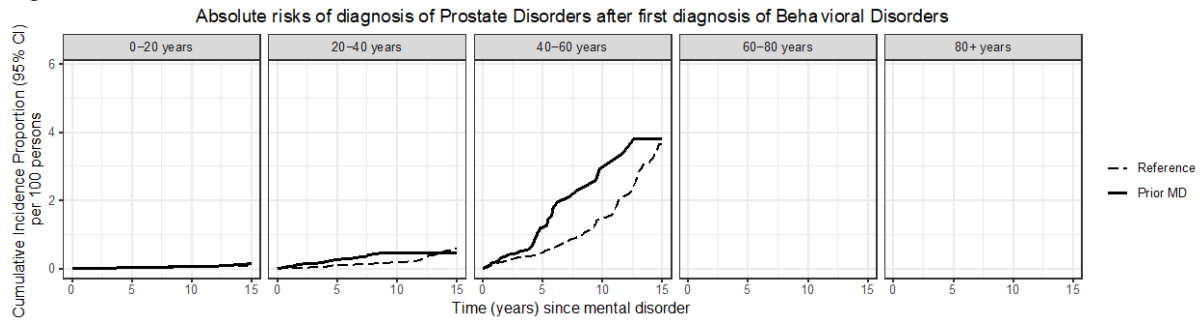

Figure S132.19 – Connective Tissue Disorders

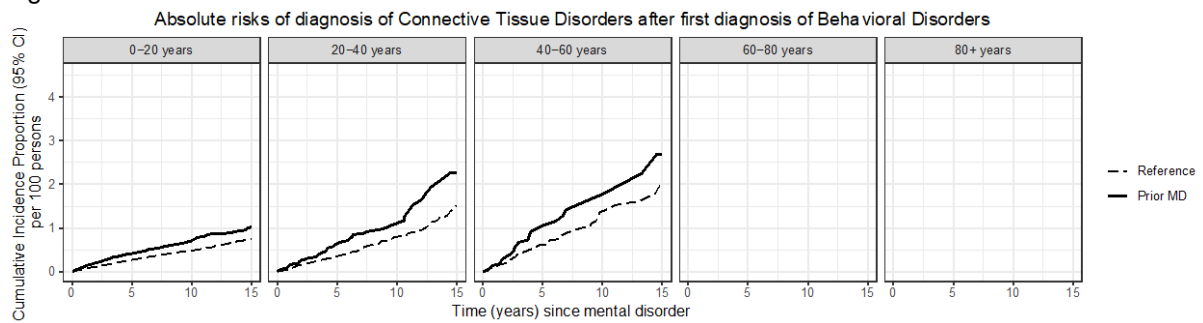

Figure S132.20 – Osteoporosis

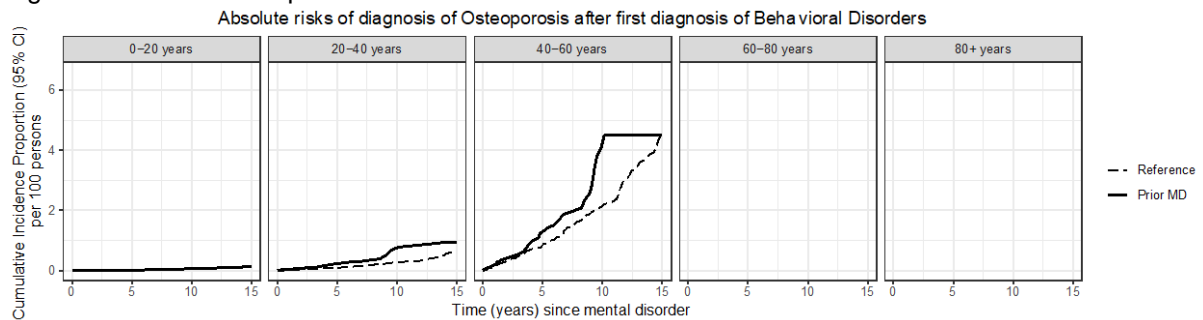

Figure S132.21 – Painful Conditions

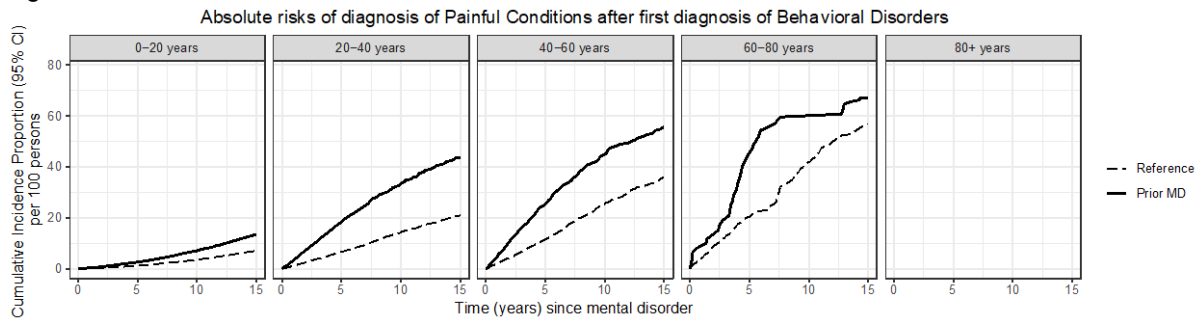

Figure S132.22 – HIV/AIDS

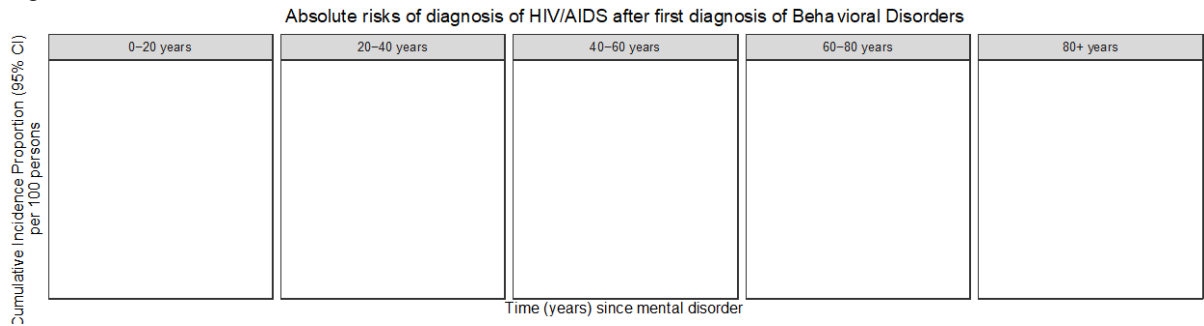

Figure S132.23 – Anemias

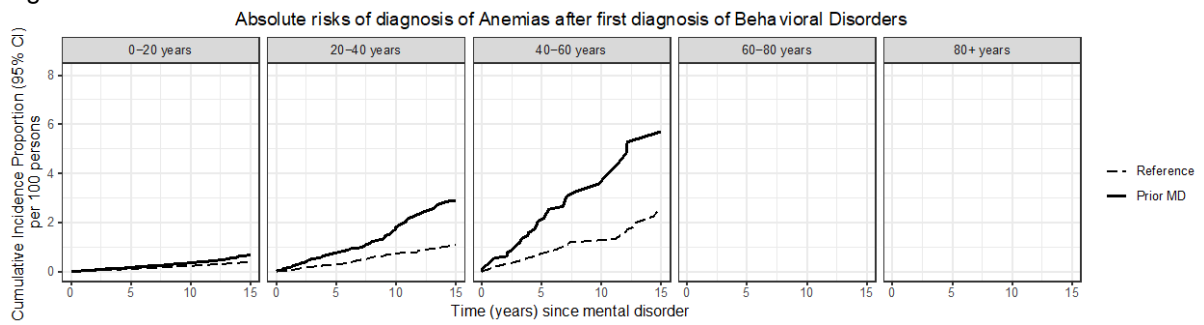

Figure S132.24 – Cancer

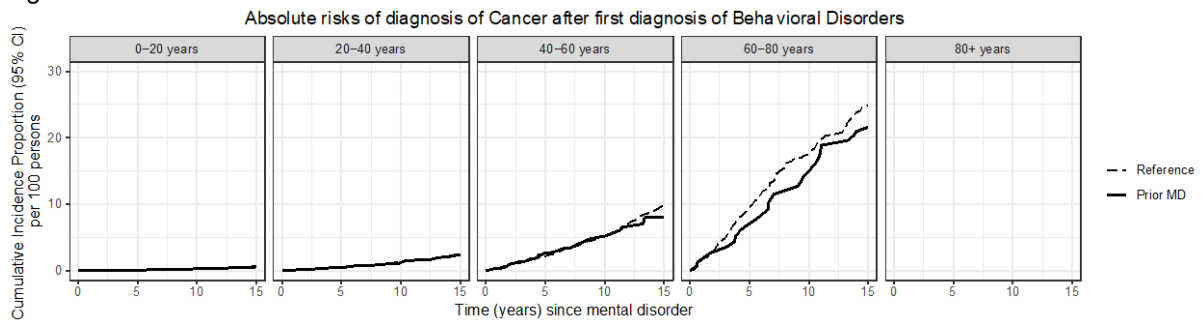

Figure S132.25 – Vision Problems

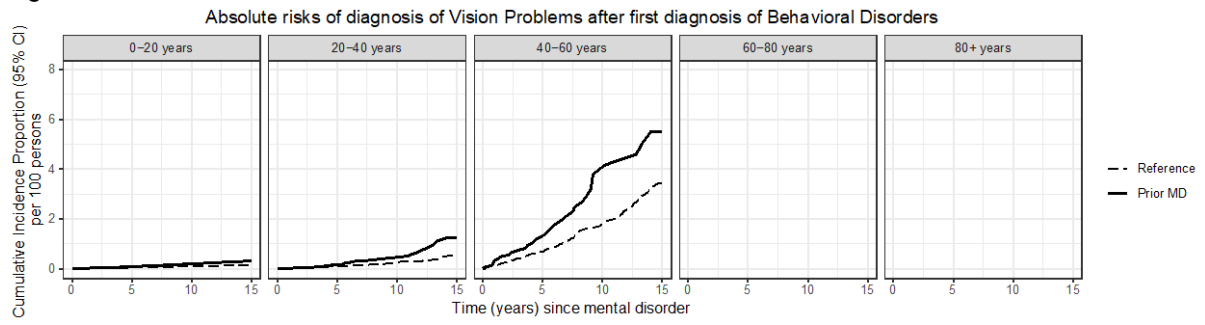

Figure S132.26 – Hearing Problems

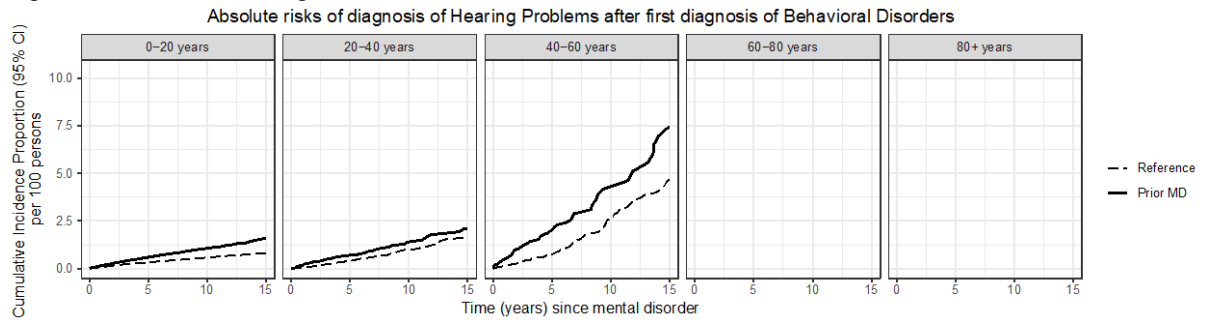

Figure S132.27 – Migraine

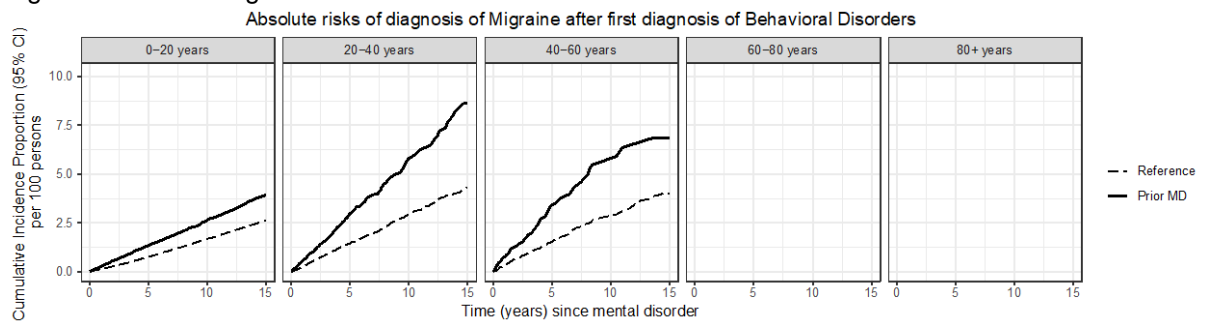

Figure S132.28 – Epilepsy

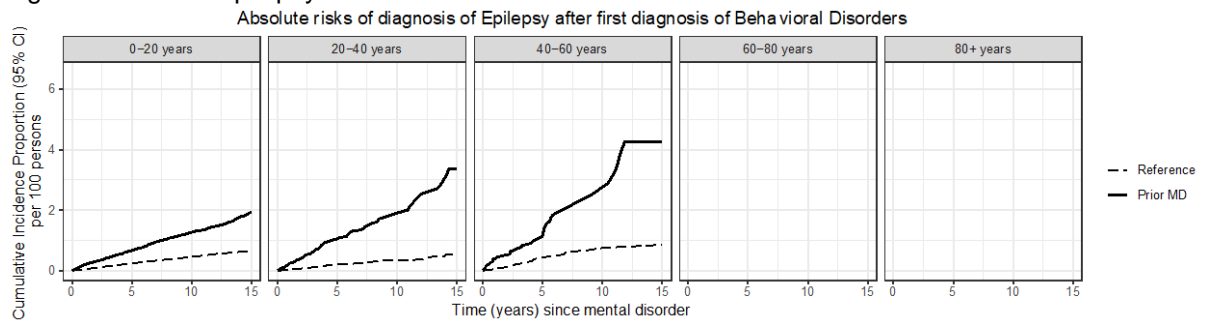

Figure S132.29 – Parkinson's Disease

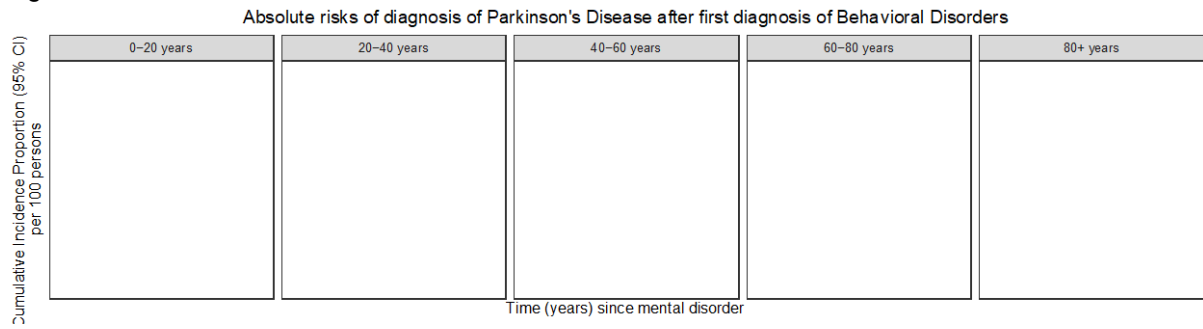

Figure S132.30 – Multiple Sclerosis

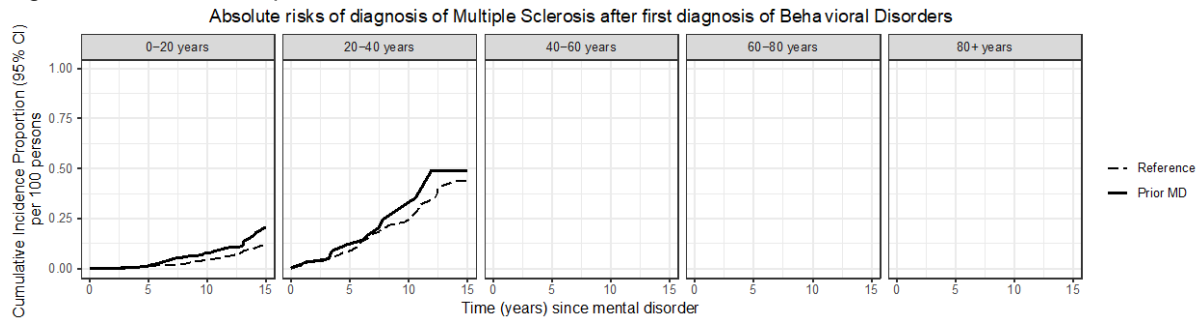

Figure S132.31 – Neuropathies

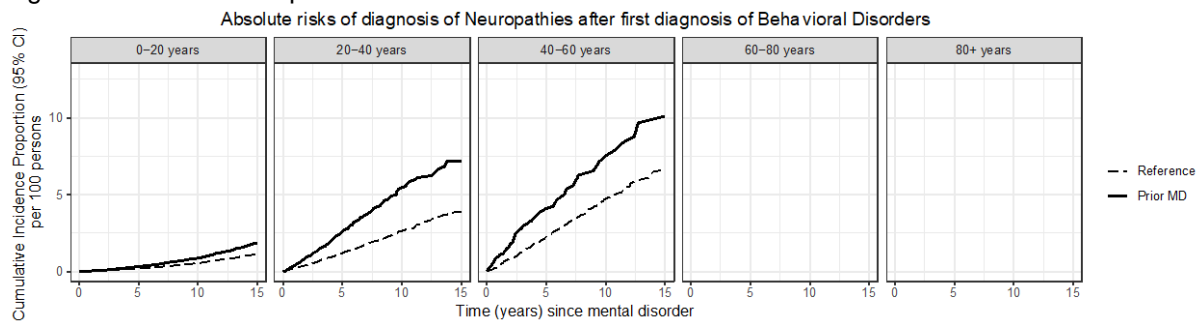



**Figures S133.1-S133.31. Sex-specific absolute risks of being diagnosed with general medical conditions after a first diagnosis of Organic Disorders**

**Figure S133.1 – Hypertension**

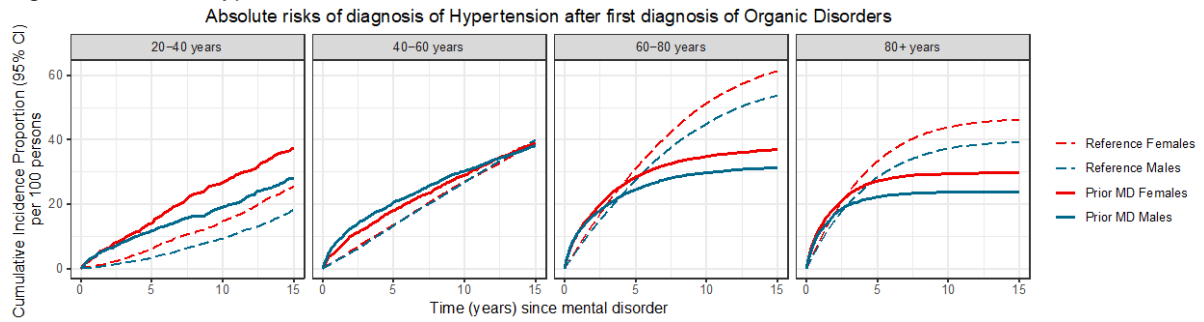

**Figure S133.2 – Dyslipidemia**

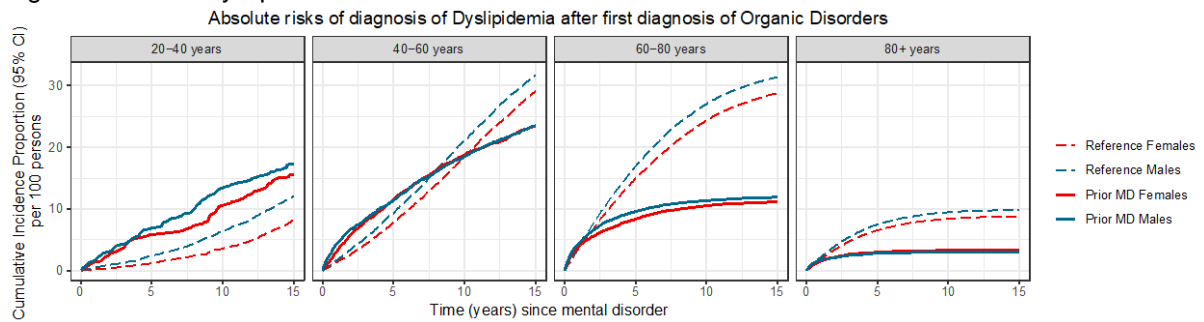

**Figure S133.3 – Ischemic Heart Disease**

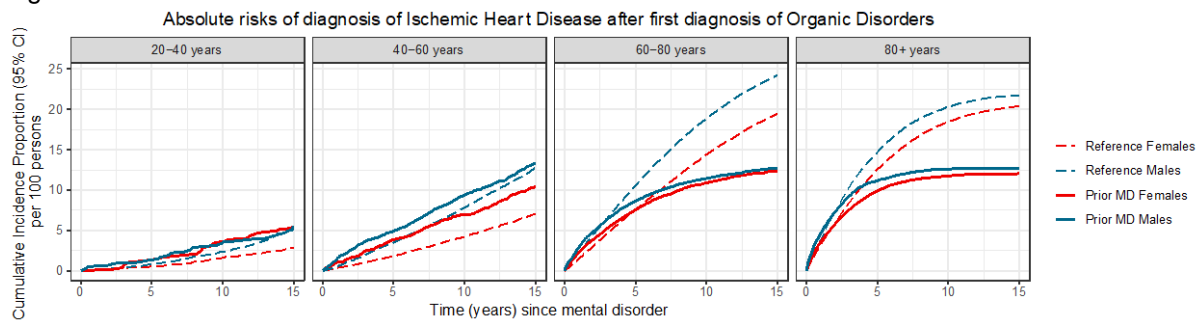

**Figure S133.4 – Atrial Fibrillation**

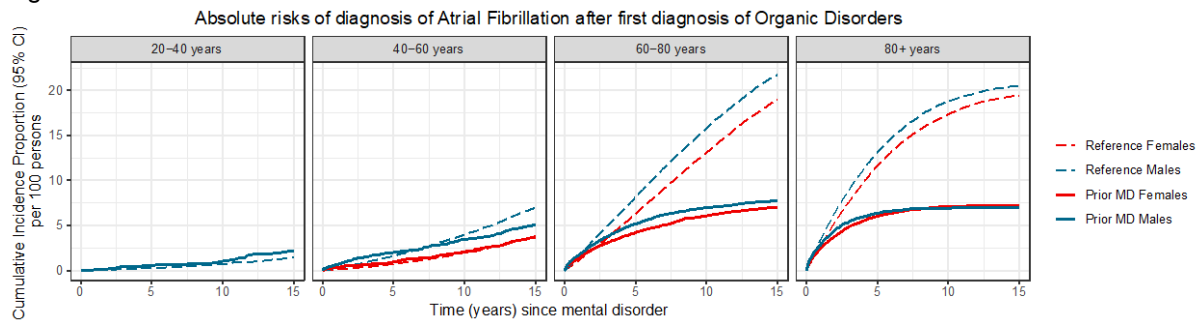

Figure S133.5 – Heart Failure

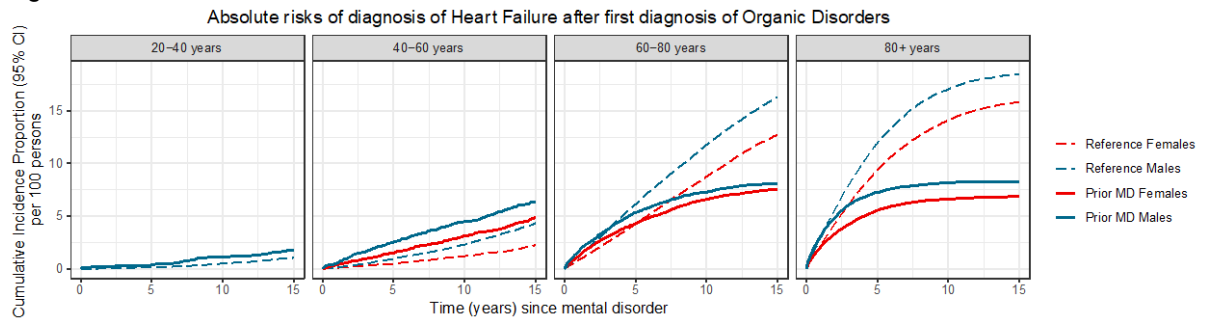

Figure S133.6 – Peripheral Artery Occlusive Disease

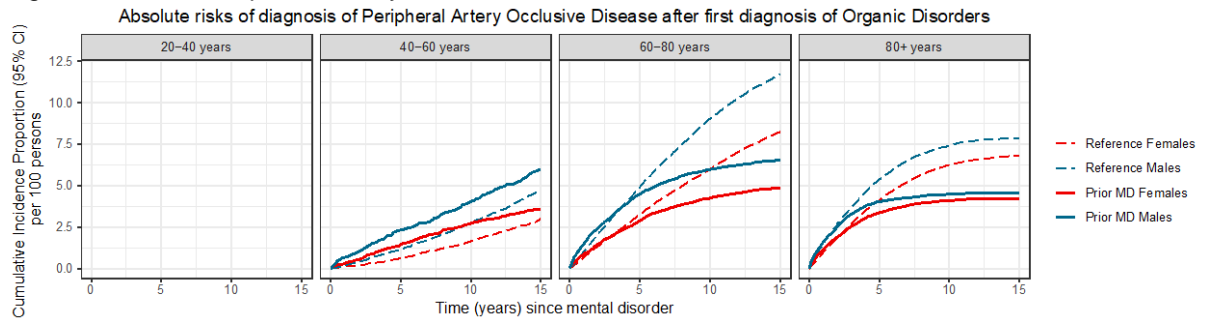

Figure S133.7 – Stroke

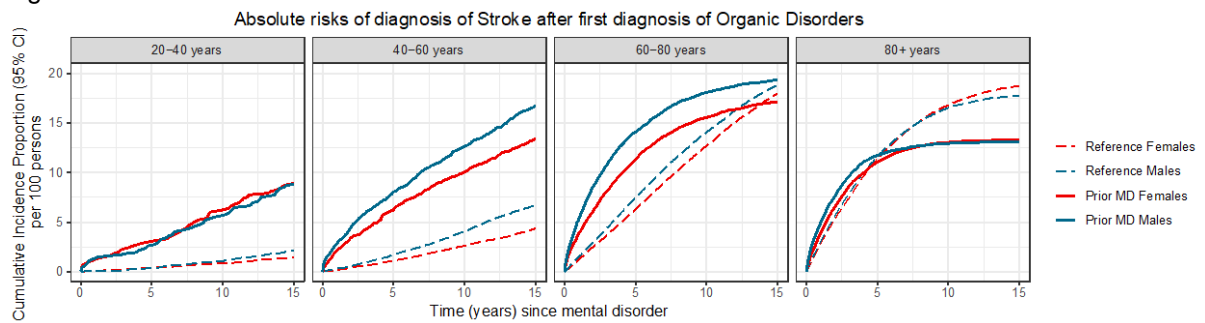

Figure S133.8 – Diabetes Mellitus

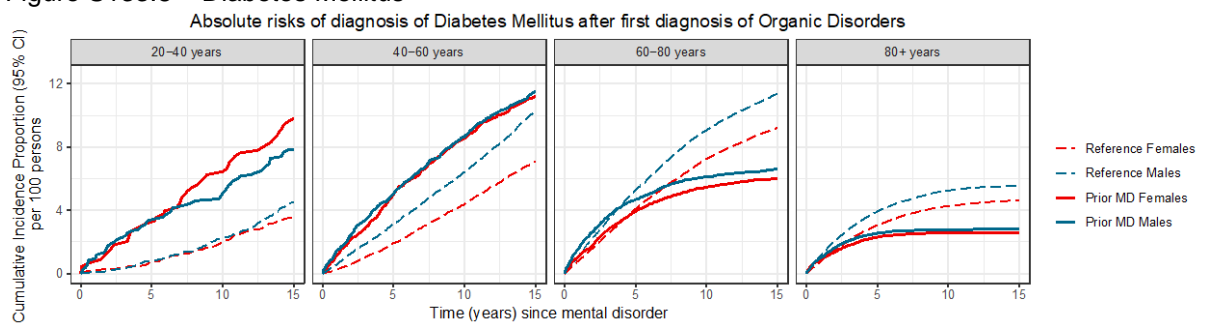

Figure S133.9 – Thyroid Disorders

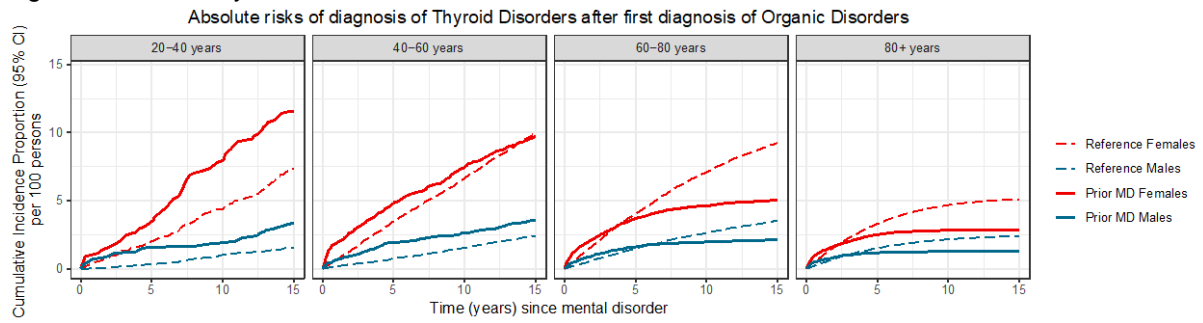

Figure S133.10 – Gout

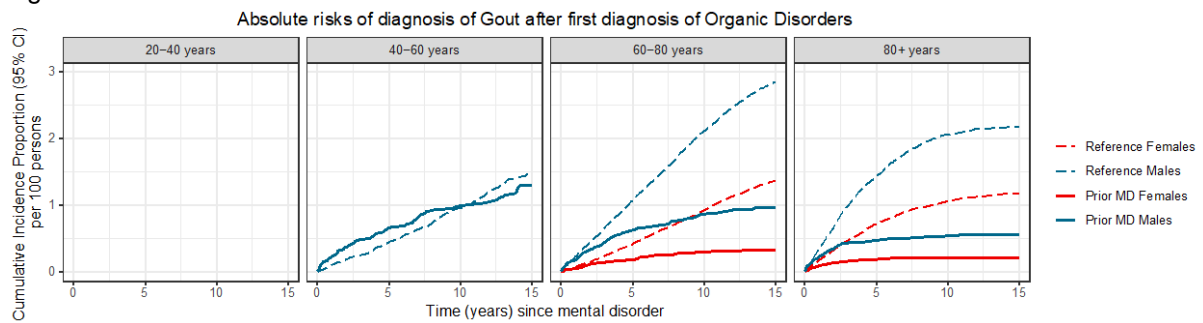

Figure S133.11 – Chronic Pulmonary Disease

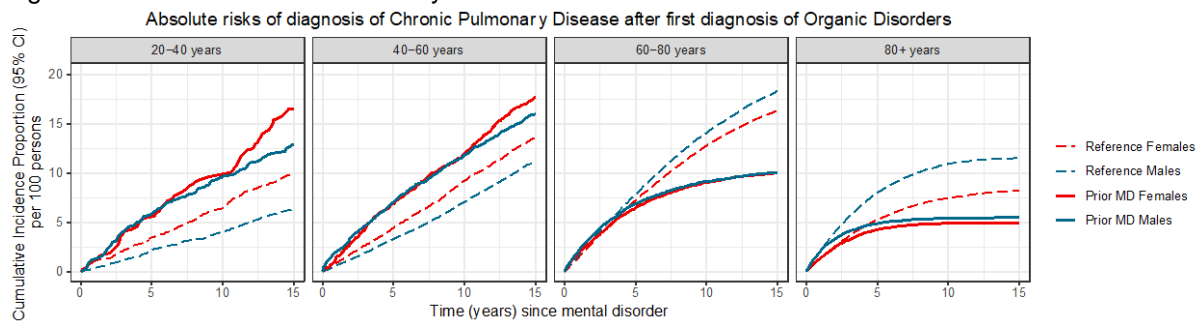

Figure S133.12 – Allergy

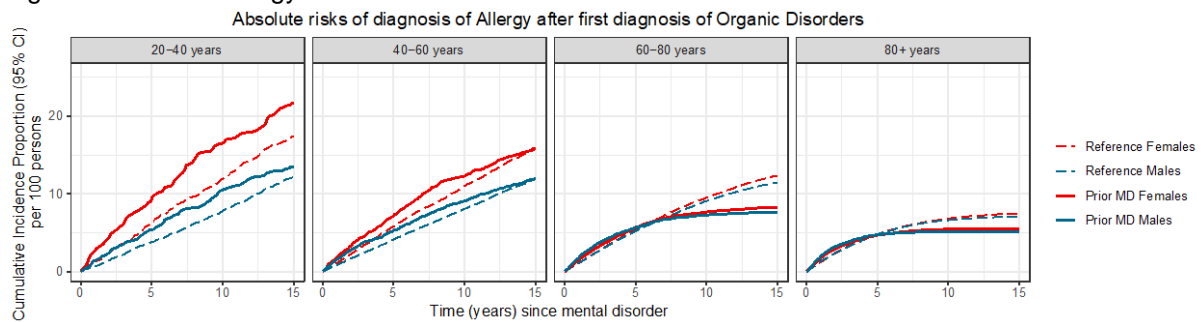

Figure S133.13 – Ulcer/Chronic Gastritis

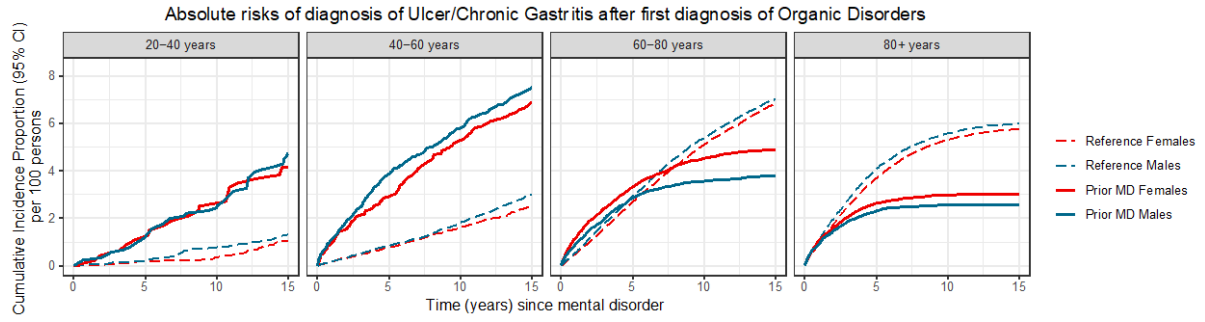

Figure S133.14 – Chronic Liver Disease

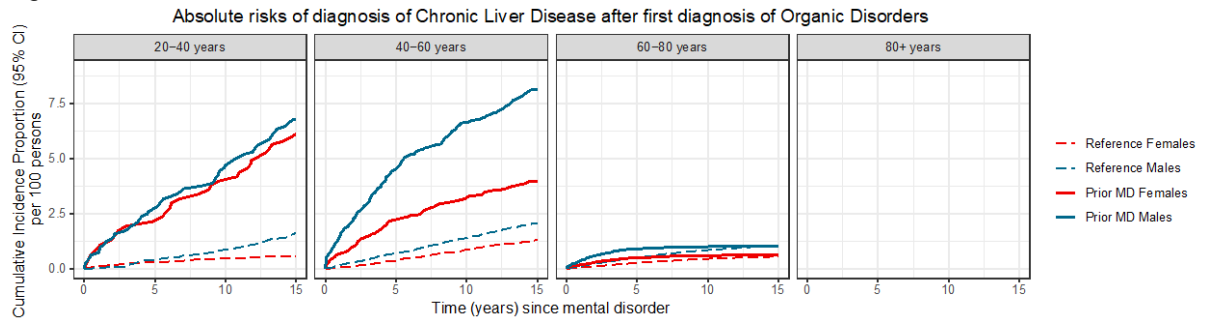

Figure S133.15 – Inflammatory Bowel Disease

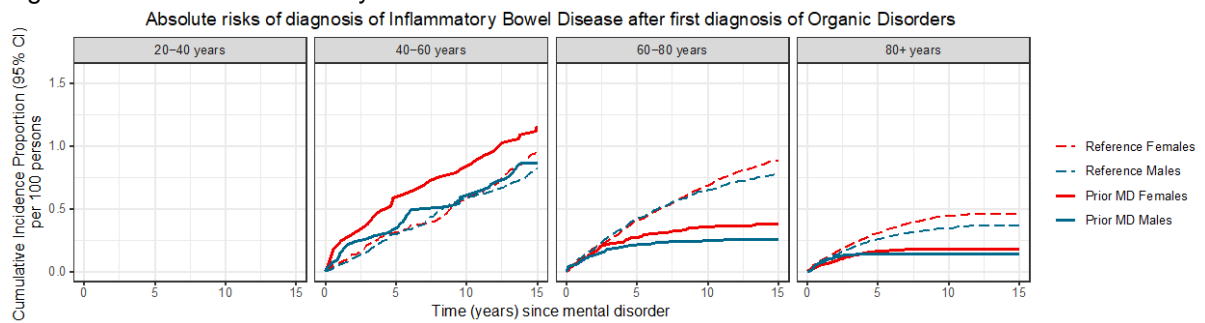

Figure S133.16 – Diverticular Disease of the Intestine

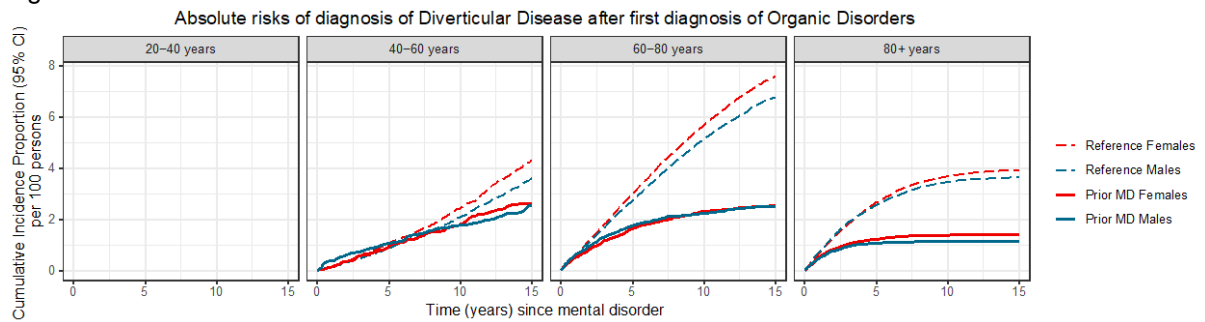

Figure S133.17 – Chronic Kidney Disease

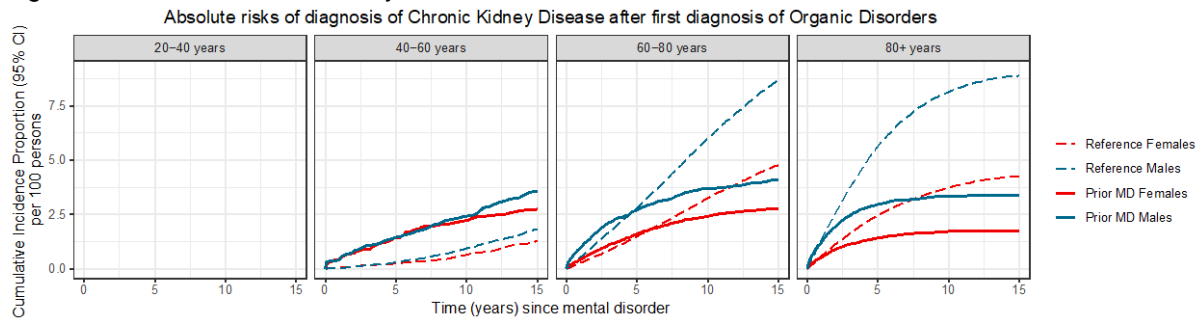

Figure S133.18 – Prostate Disorders

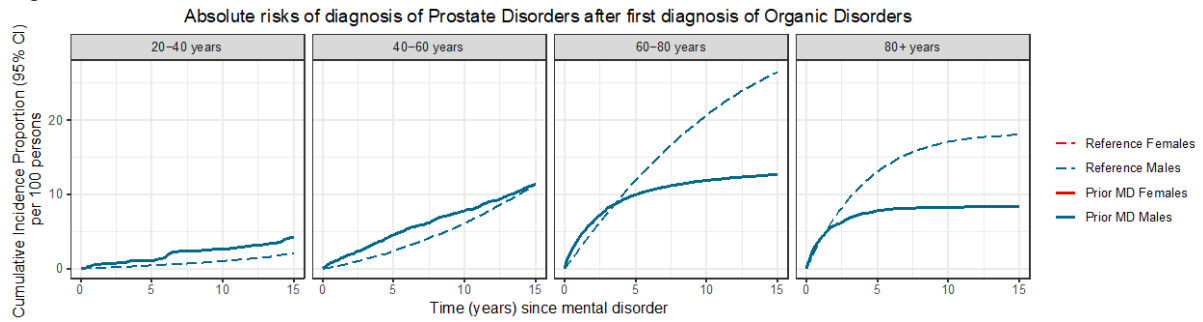

Figure S133.19 – Connective Tissue Disorders

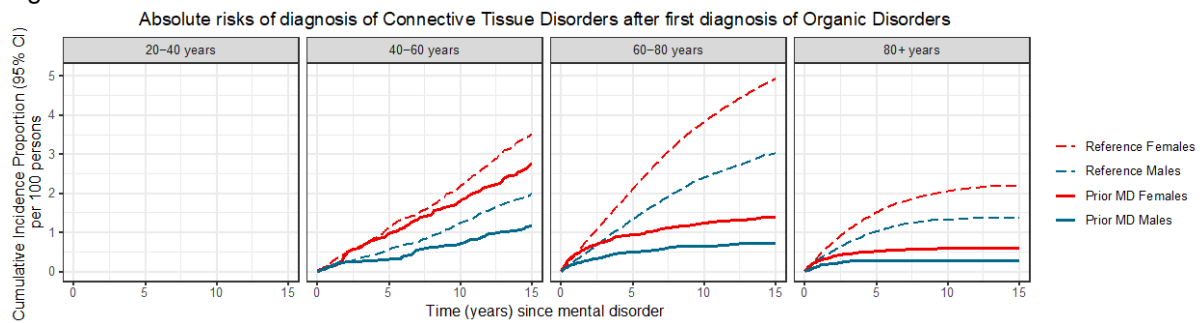

Figure S133.20 – Osteoporosis

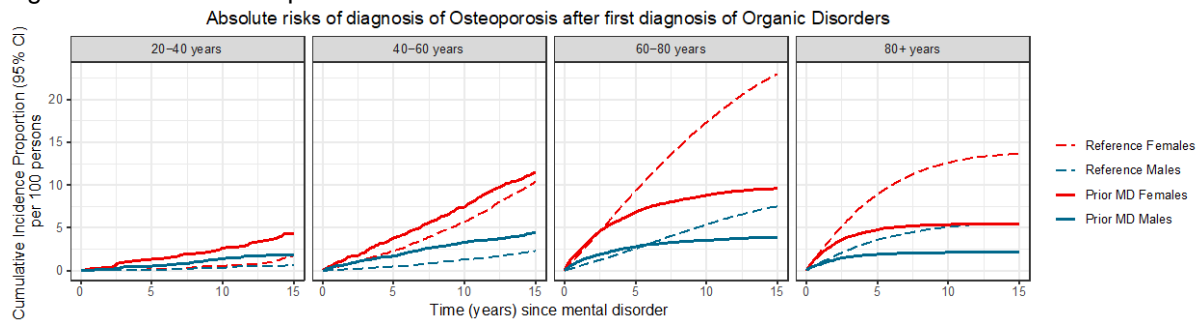

Figure S133.21 – Painful Conditions

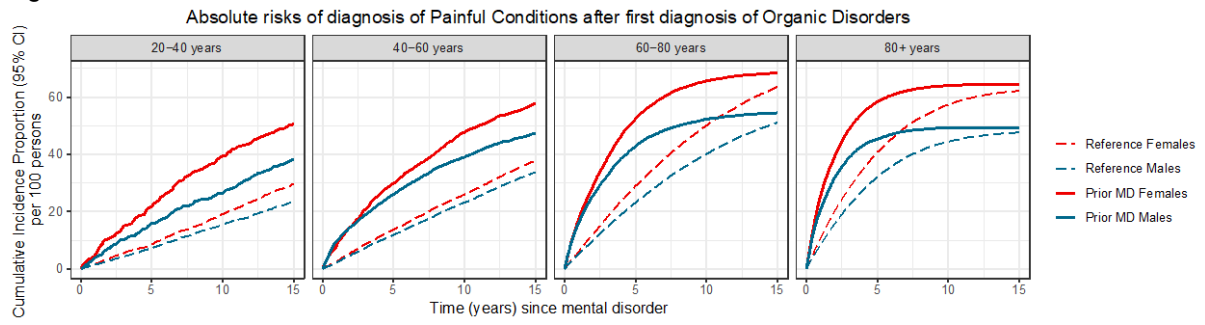

Figure S133.22 – HIV/AIDS

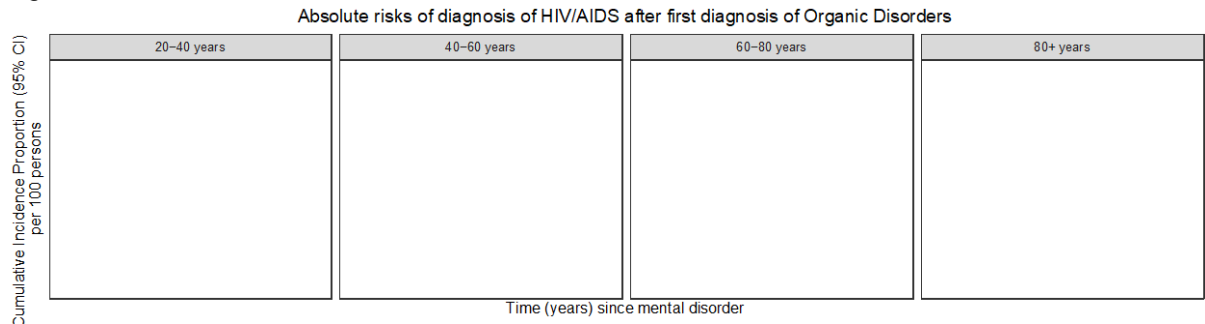

Figure S133.23 – Anemias

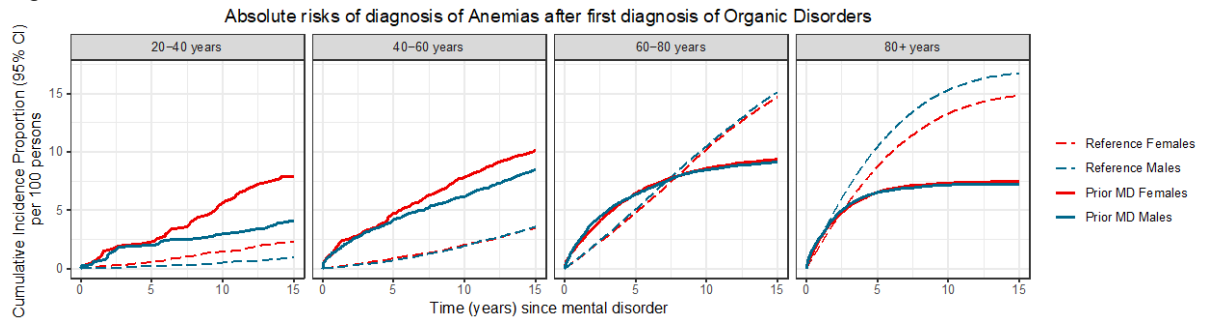

Figure S133.24 – Cancer

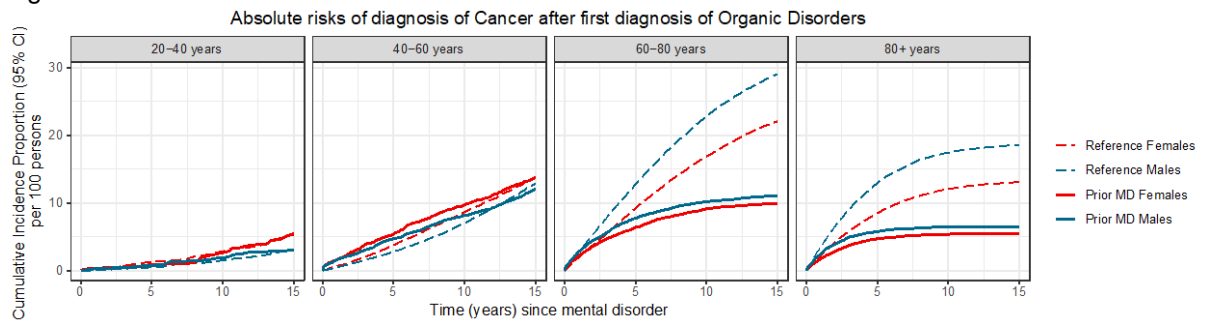

Figure S133.25 – Vision Problems

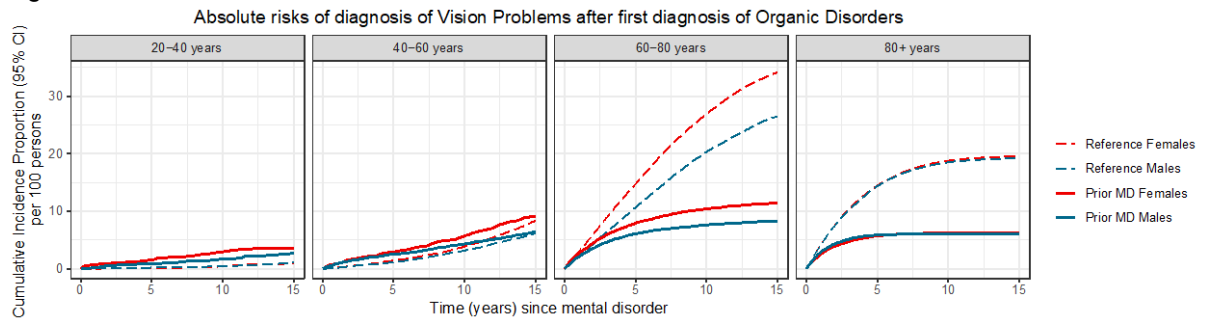

Figure S133.26 – Hearing Problems

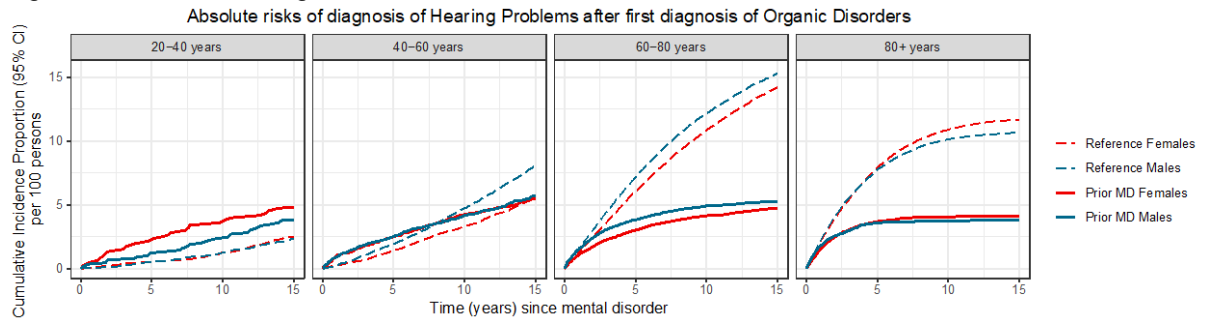

Figure S133.27 – Migraine

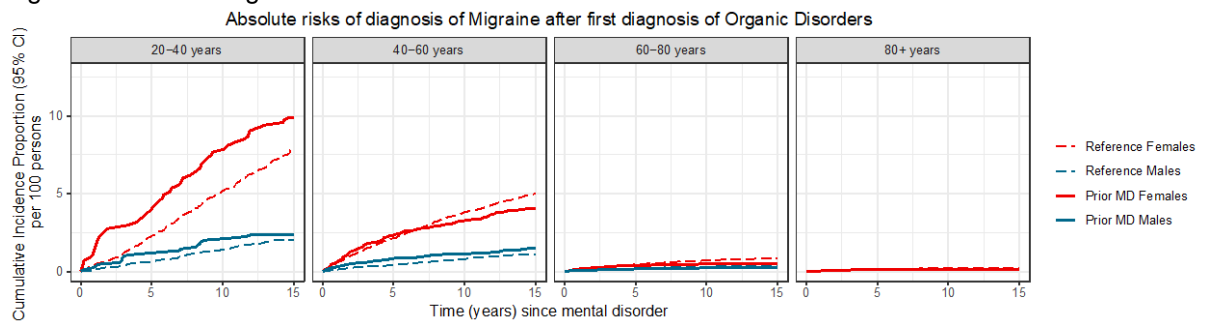

Figure S133.28 – Epilepsy

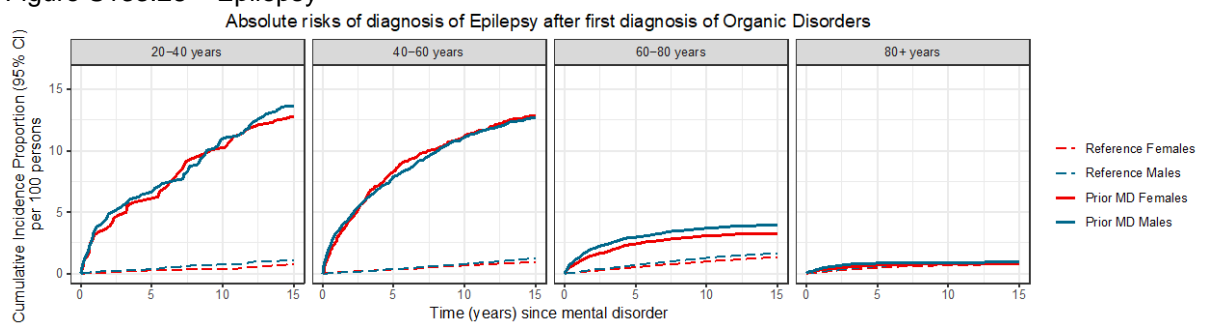

Figure S133.29 – Parkinson's Disease

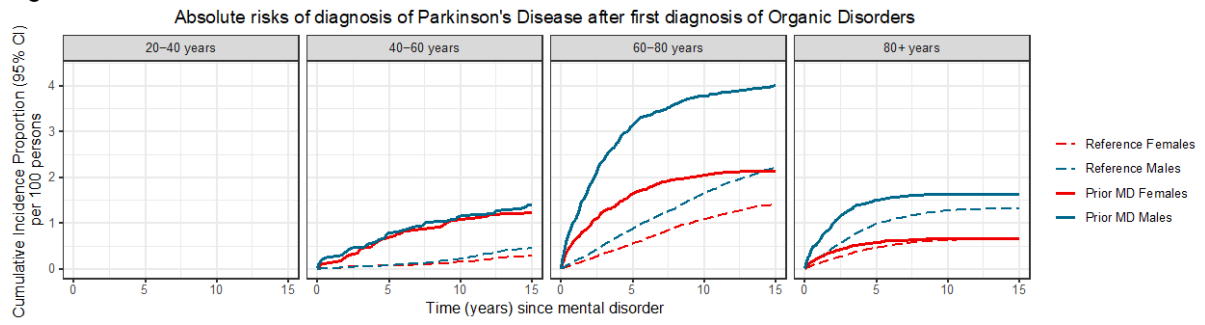

Figure S133.30 – Multiple Sclerosis

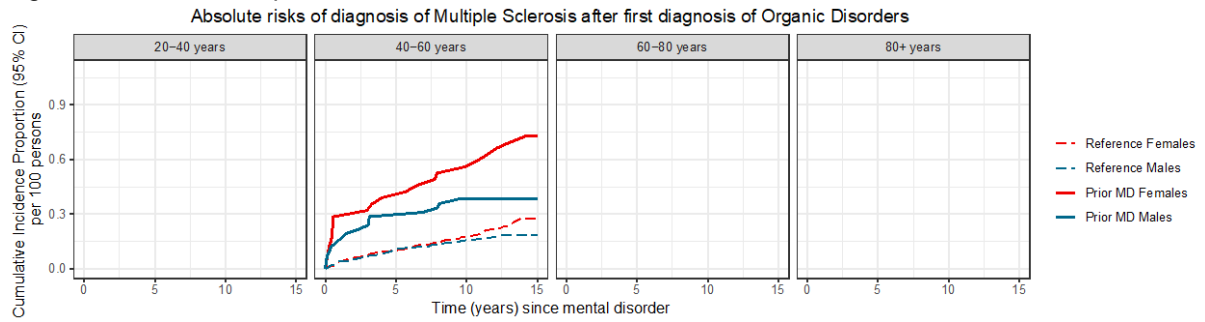

Figure S133.31 – Neuropathies

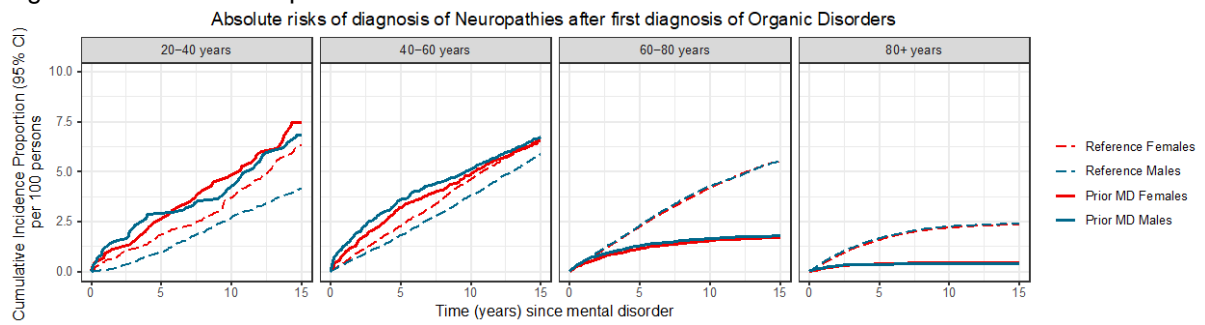



**Figures S134.1-S134.31. Sex-specific absolute risks of being diagnosed with general medical conditions after a first diagnosis of Substance Use Disorders.**

**Figure S134.1 - Hypertension**

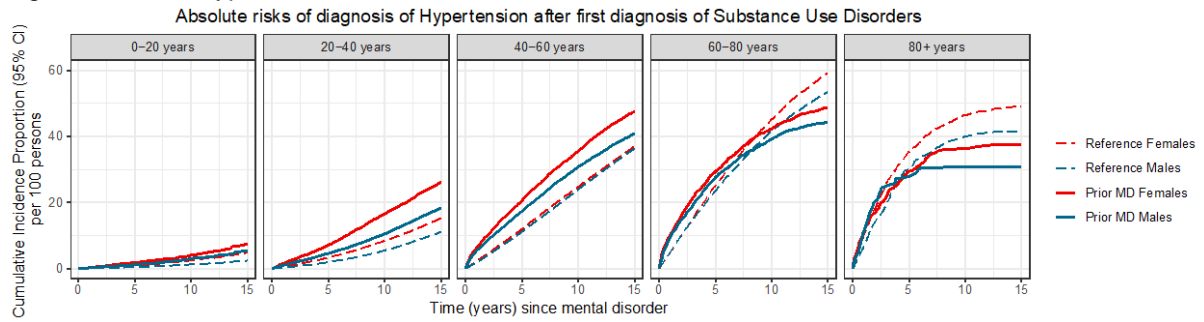

**Figure S134.2 – Dyslipidemia**

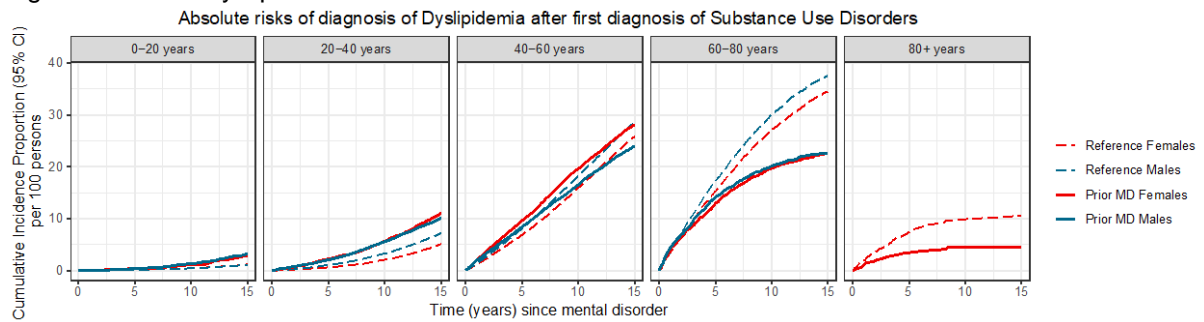

**Figure S134.3 – Ischemic Heart Disease**

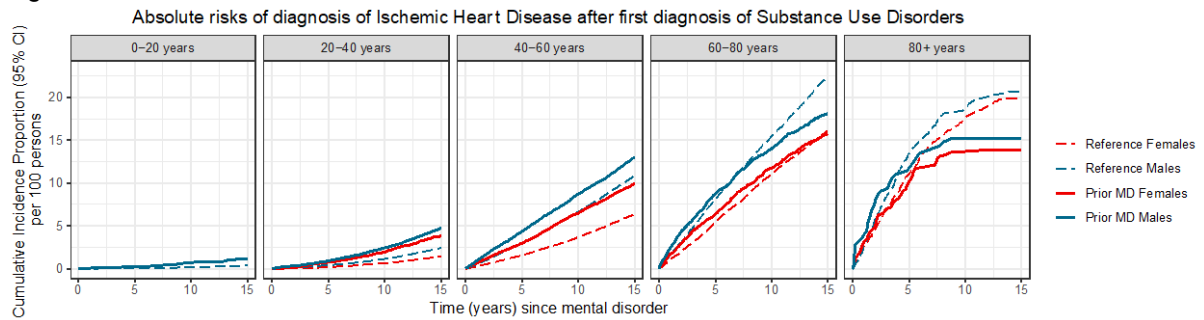

**Figure S134.4 – Atrial Fibrillation**

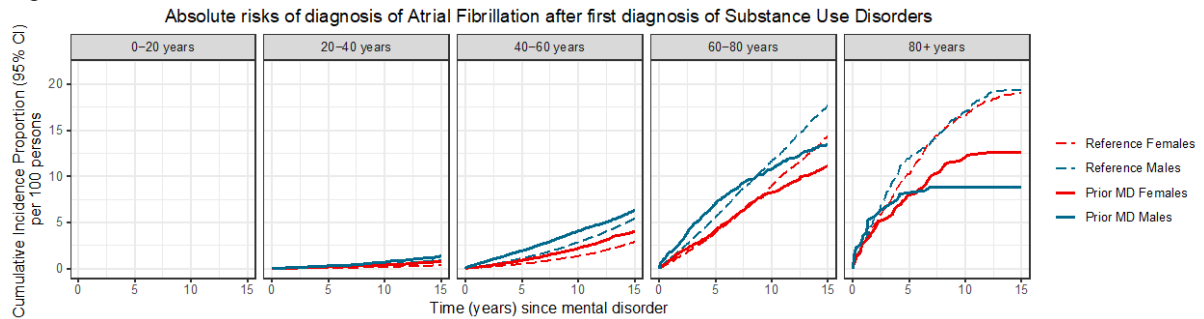

Figure S134.5 – Heart Failure

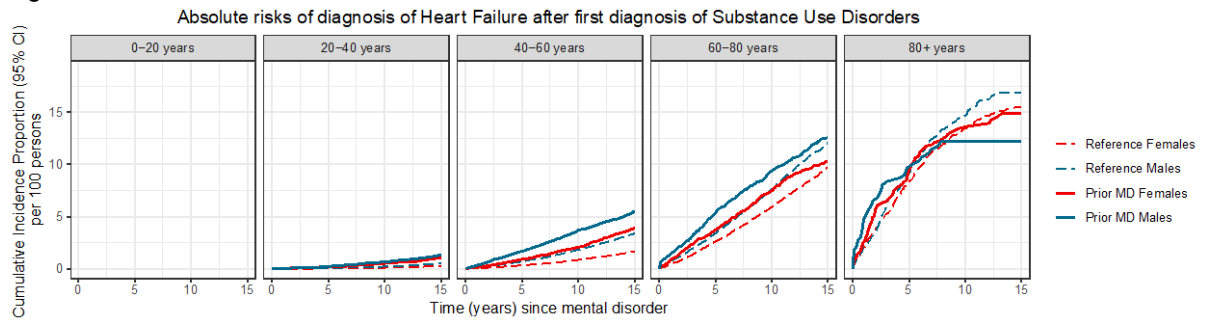

Figure S134.6 – Peripheral Artery Occlusive Disease

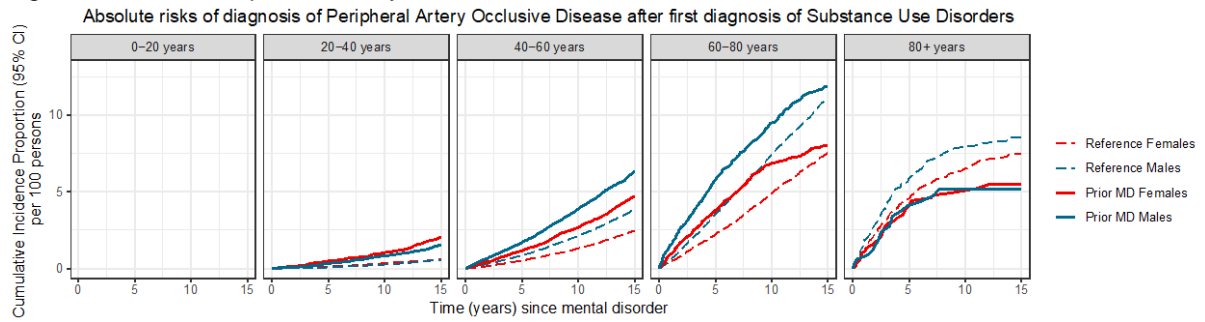

Figure S134.7 – Stroke

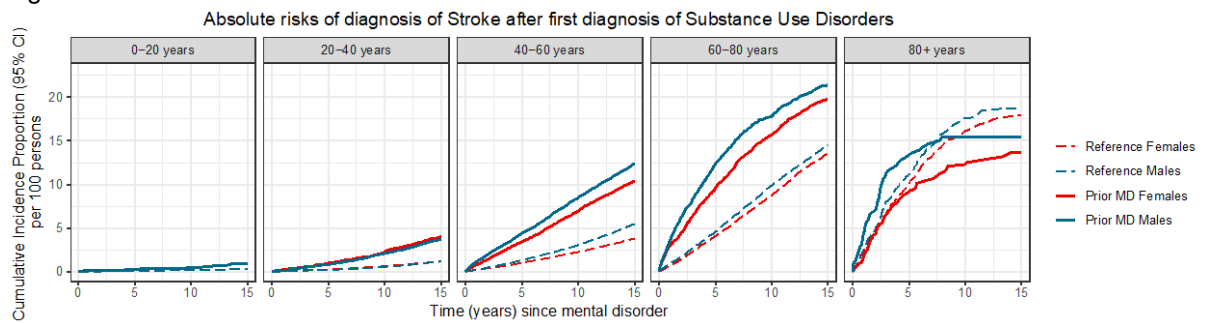

Figure S134.8 – Diabetes Mellitus

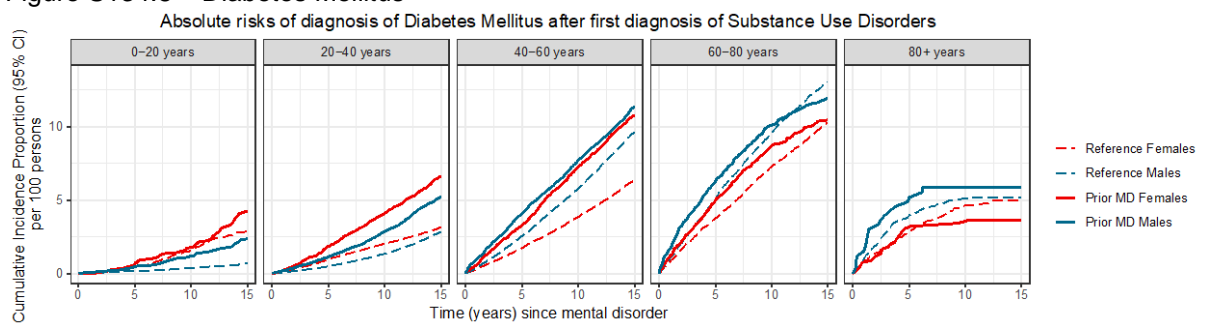

Figure S134.9 – Thyroid Disorders

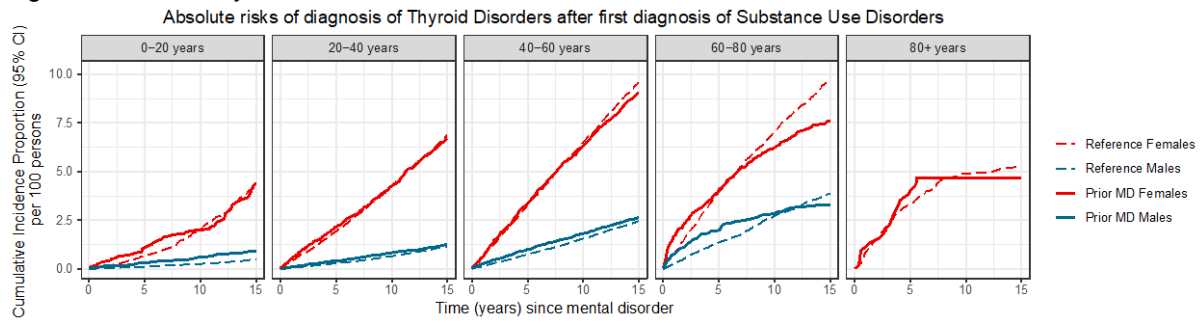

Figure S134.10 – Gout

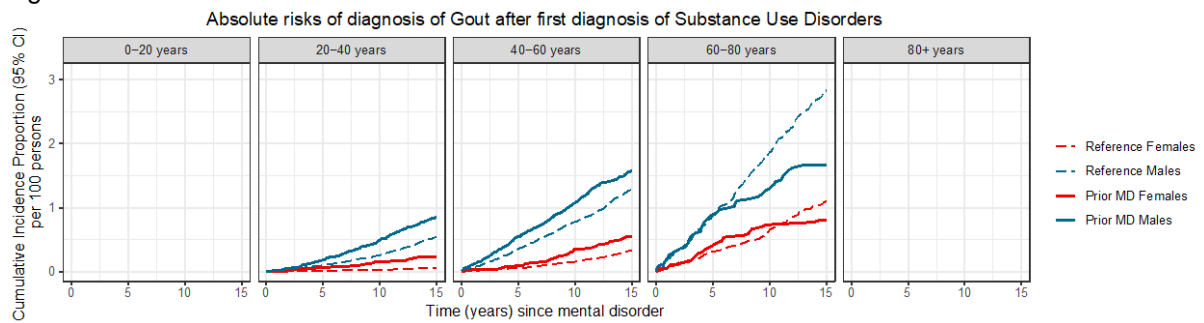

Figure S134.11 – Chronic Pulmonary Disease

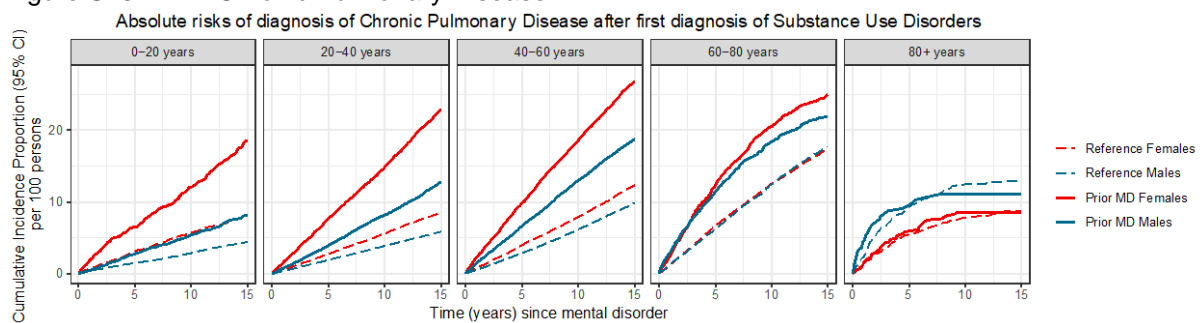

Figure S134.12 – Allergy

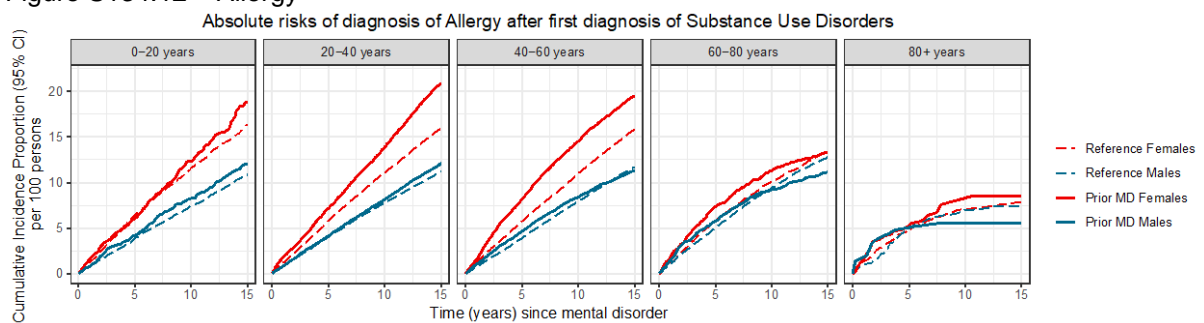

Figure S134.13 – Ulcer/Chronic Gastritis

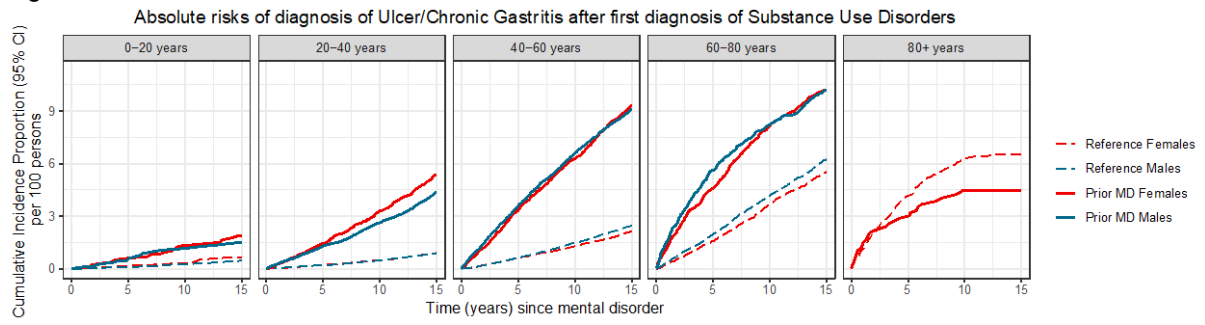

Figure S134.14 – Chronic Liver Disease

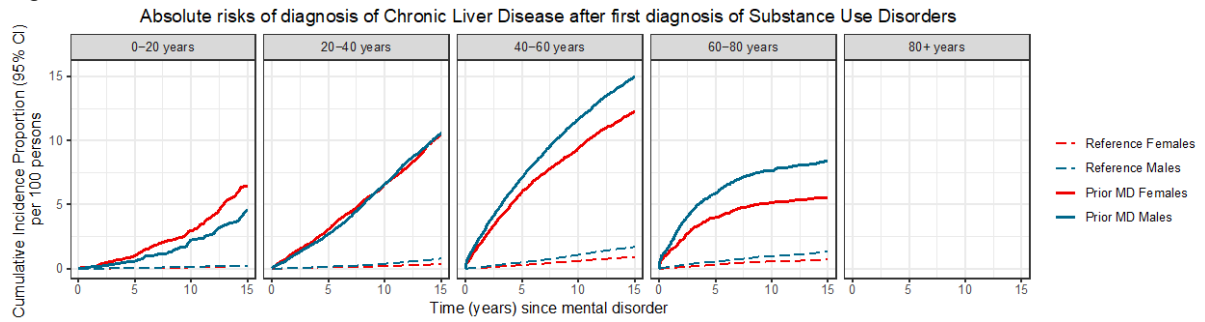

Figure S134.15 – Inflammatory Bowel Disease

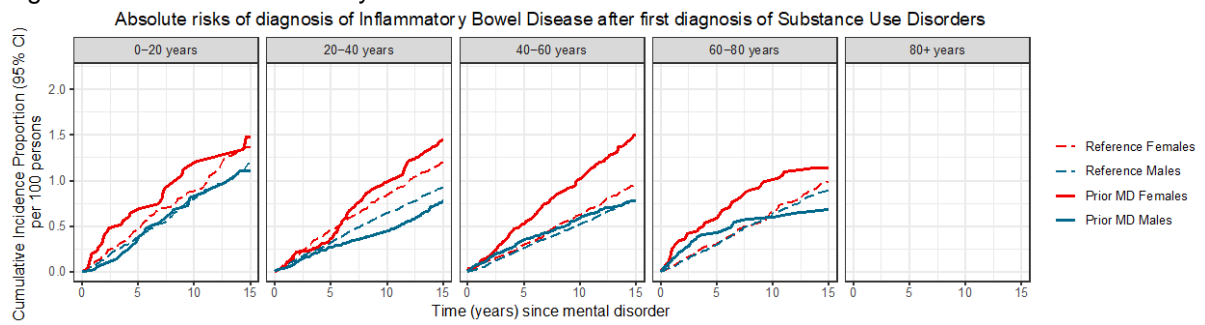

Figure S134.16 – Diverticular Disease of the Intestine

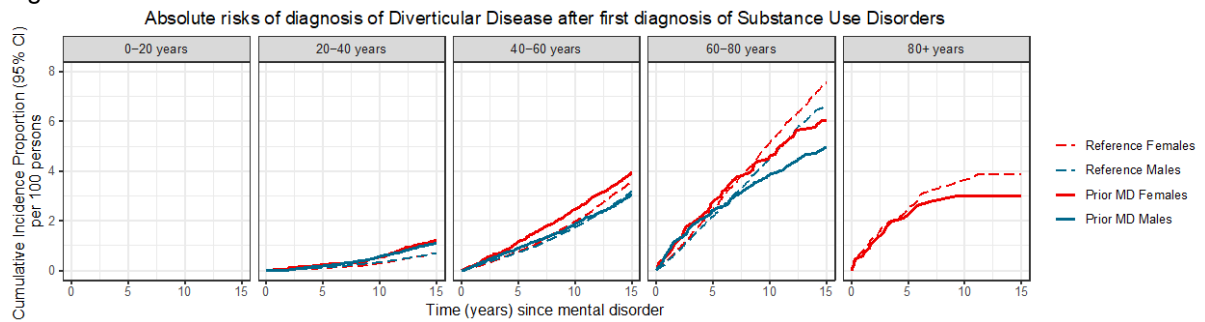

Figure S134.17 – Chronic Kidney Disease

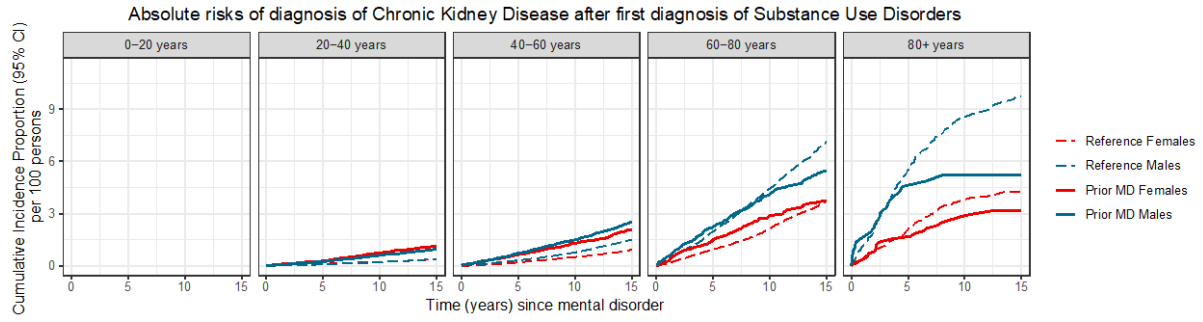

Figure S134.18 – Prostate Disorders

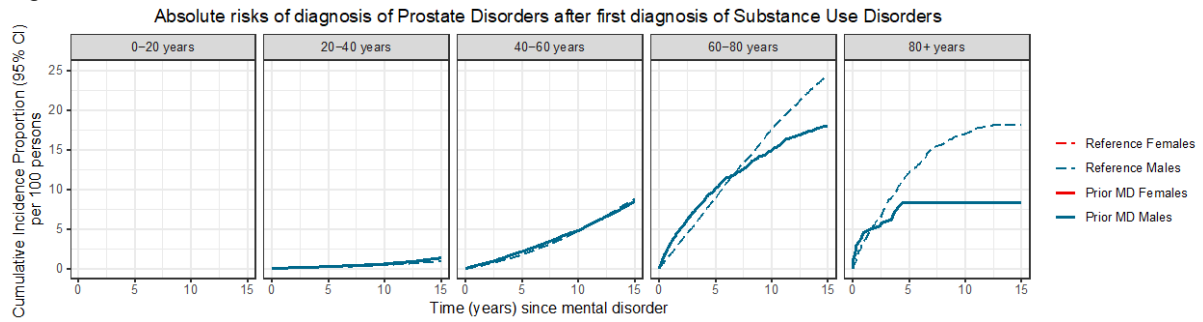

Figure S134.19 – Connective Tissue Disorders

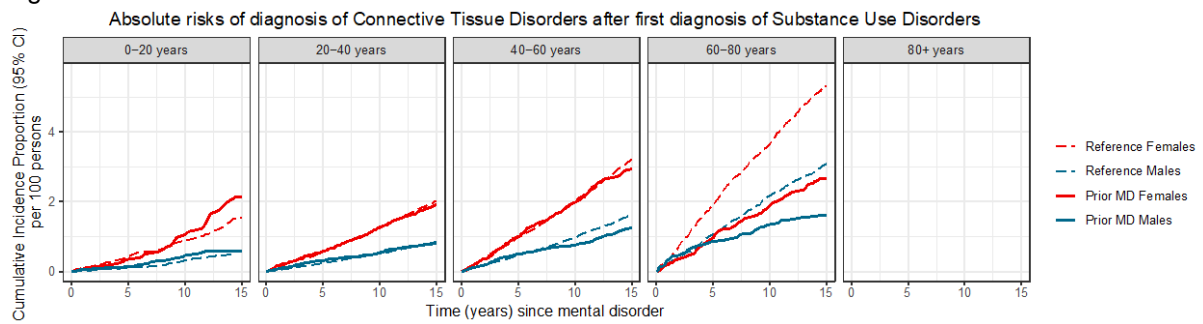

Figure S134.20 – Osteoporosis

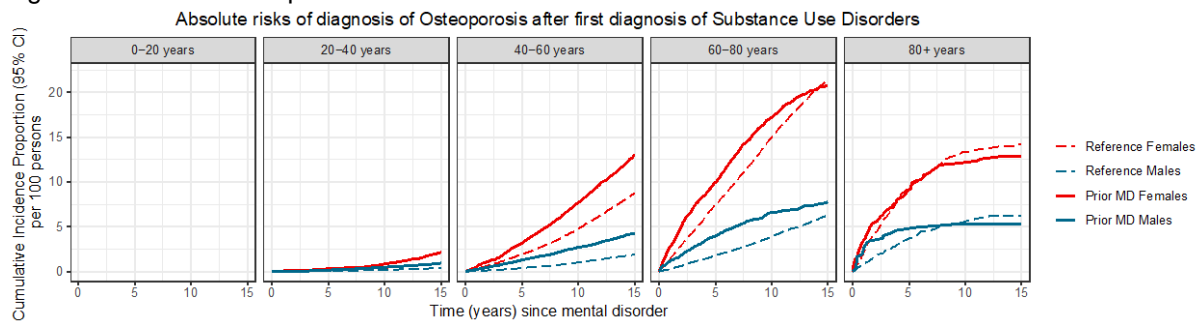

Figure S134.21 – Painful Conditions

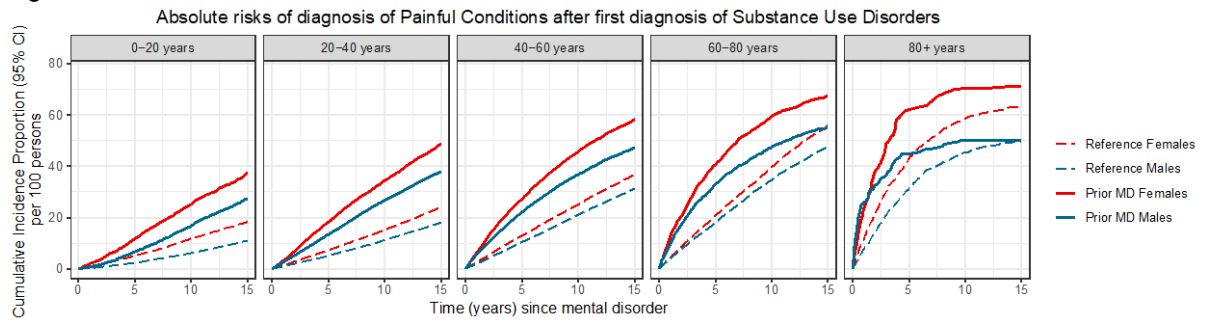

Figure S134.22 – HIV/AIDS

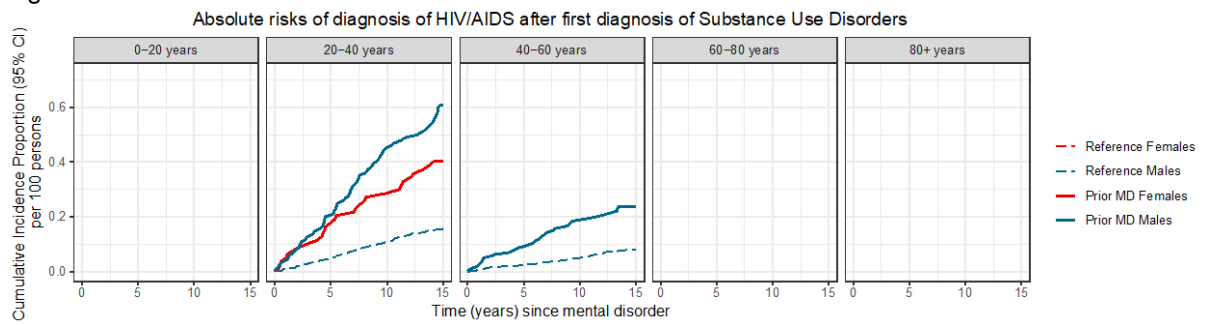

Figure S134.23 – Anemias

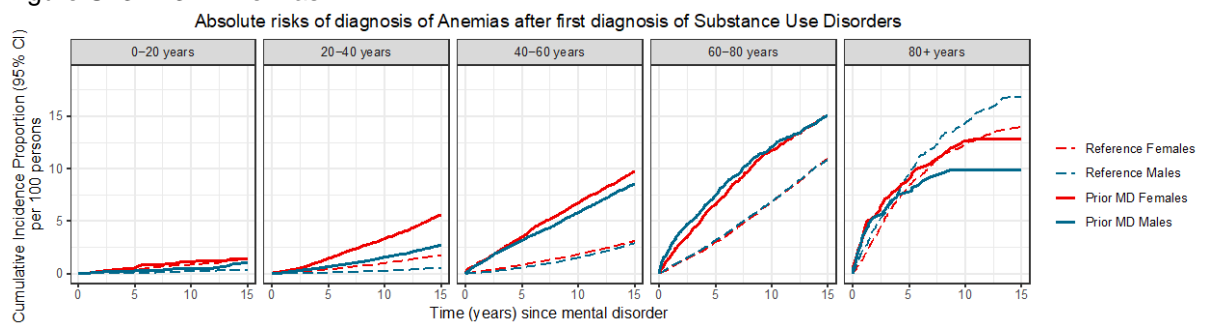

Figure S134.24 – Cancer

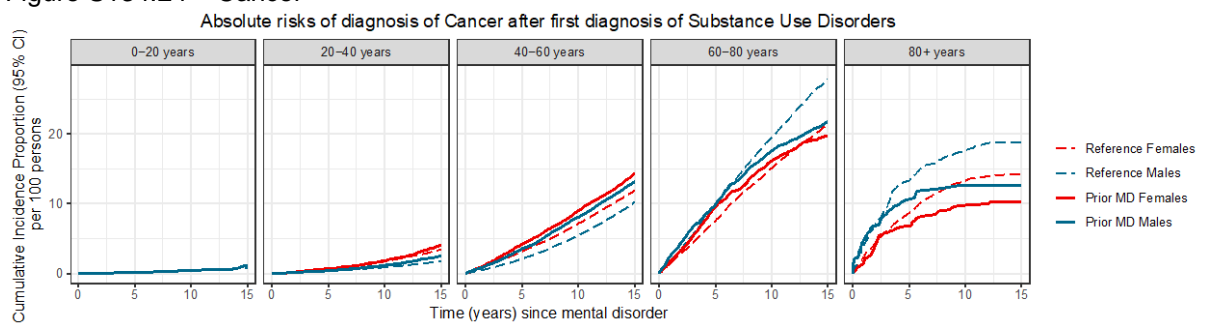

Figure S134.25 – Vision Problems

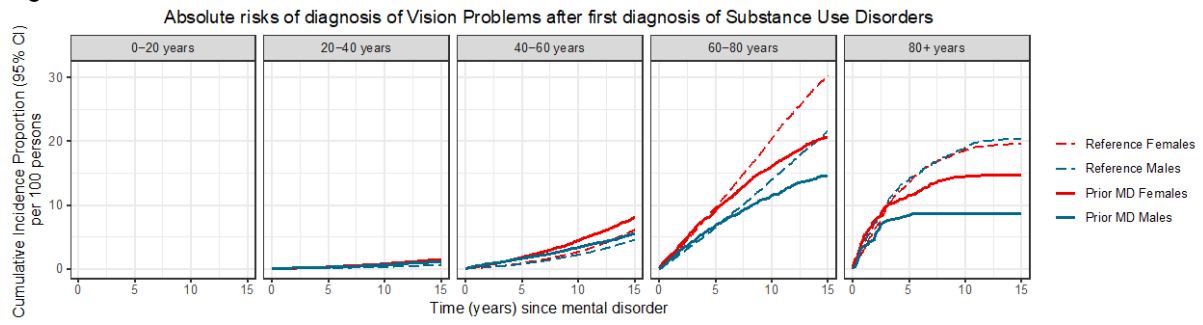

Figure S134.26 – Hearing Problems

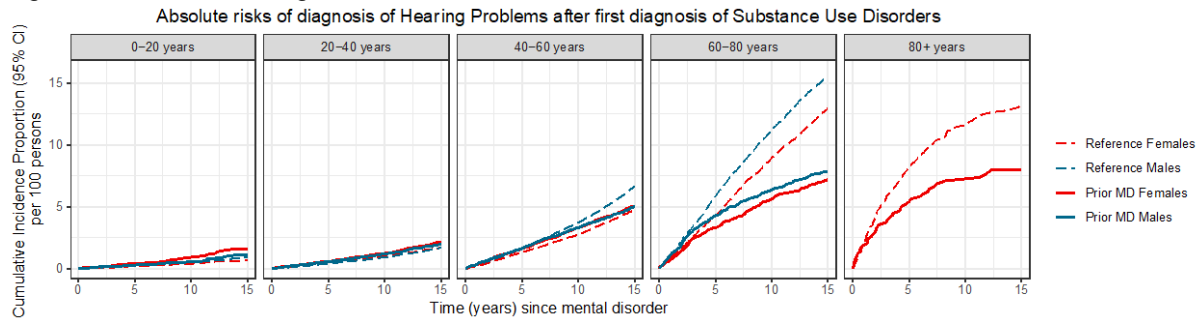

Figure S134.27 – Migraine

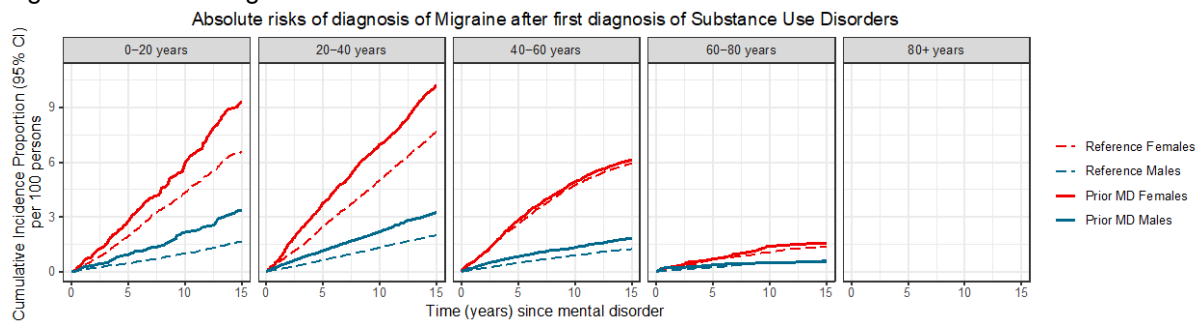

Figure S134.28 – Epilepsy

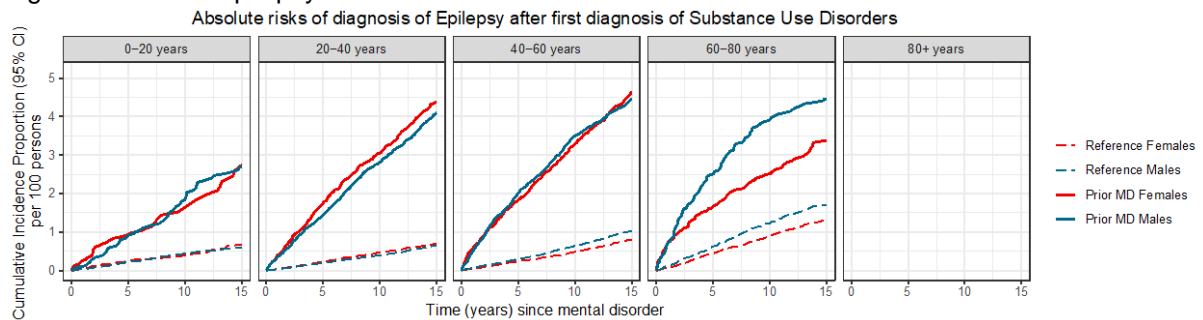

Figure S134.29 – Parkinson's Disease

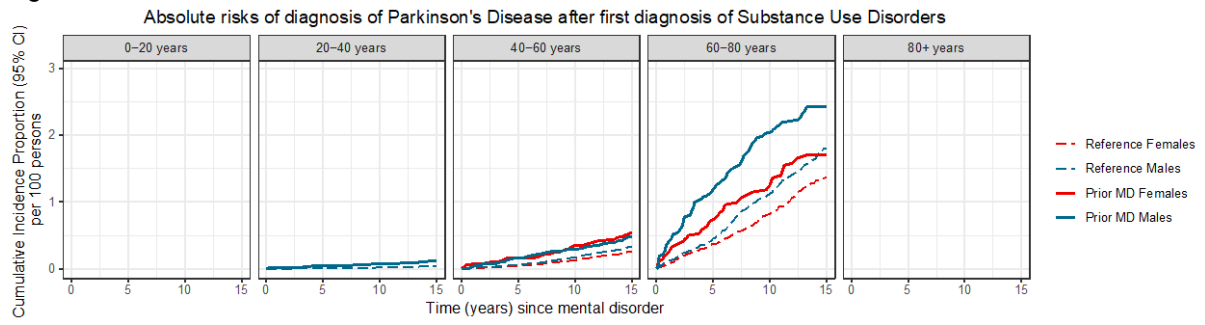

Figure S134.30 – Multiple Sclerosis

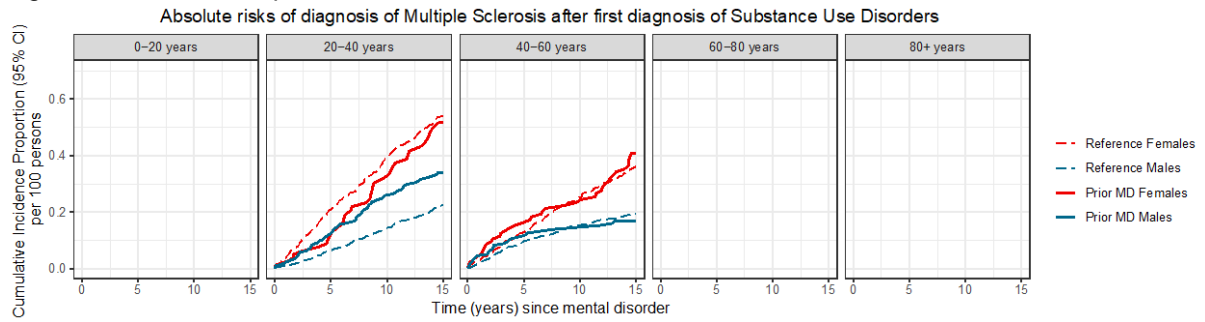

Figure S134.31 – Neuropathies

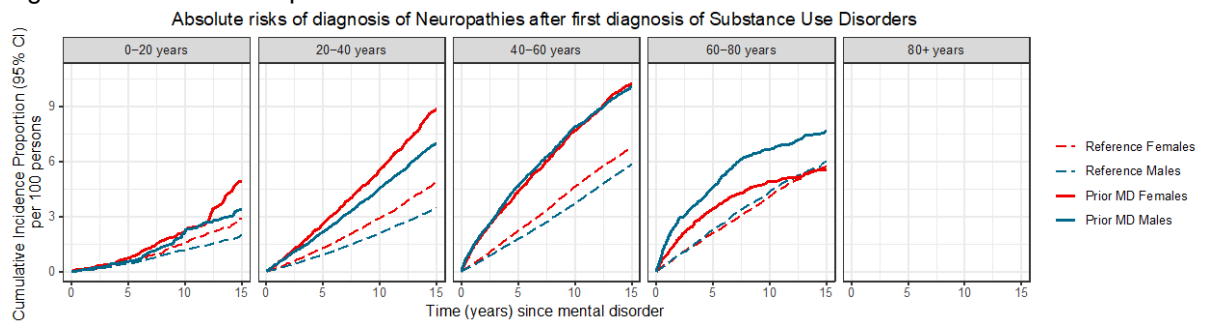



**Figures S135.1-S135.31. Sex-specific absolute risks of being diagnosed with general medical conditions after a first diagnosis of Schizophrenia**

**Figure S135.1 - Hypertension**

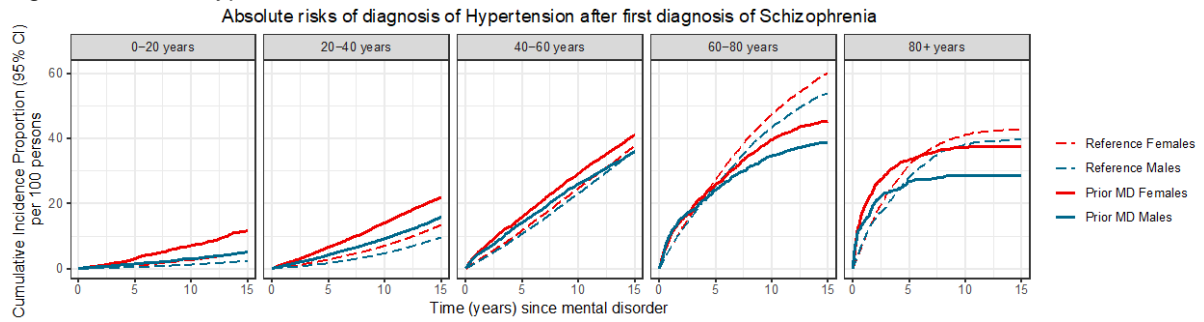

**Figure S135.2 – Dyslipidemia**

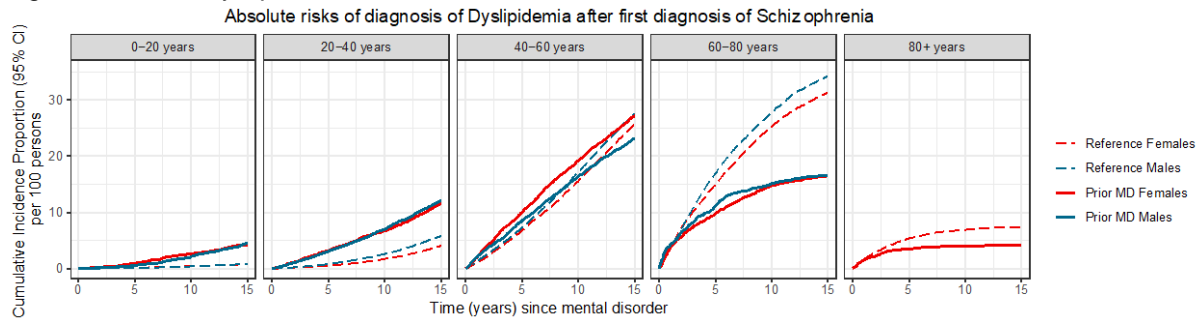

**Figure S135.3 – Ischemic Heart Disease**

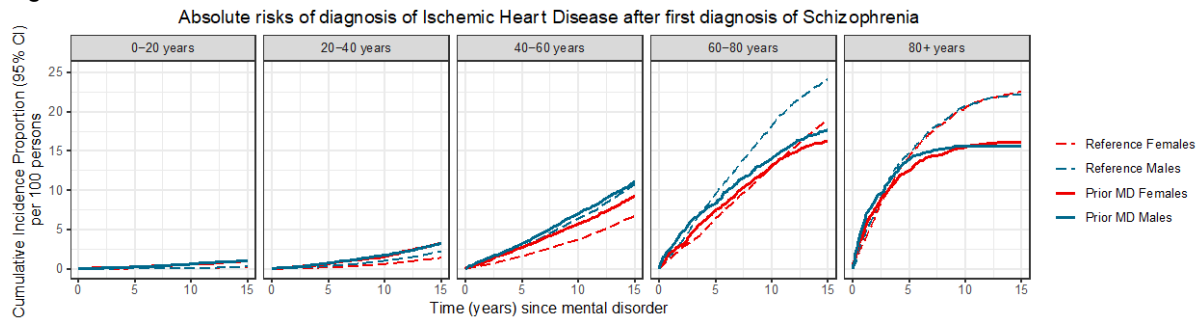

**Figure S135.4 – Atrial Fibrillation**

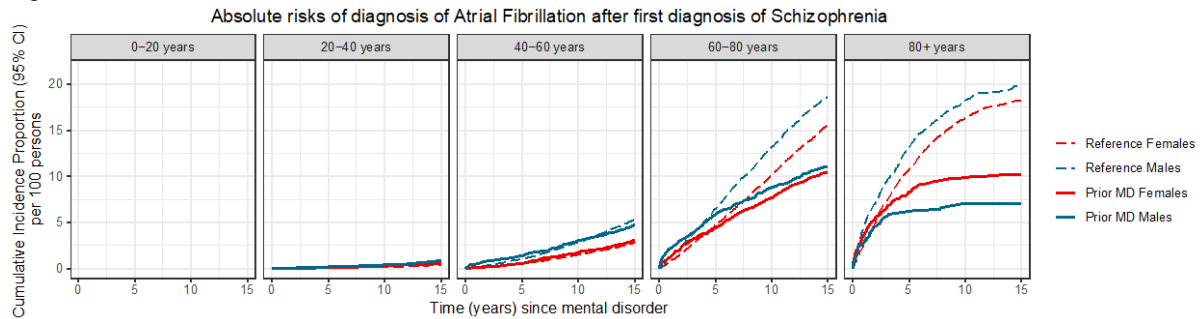

Figure S135.5 – Heart Failure

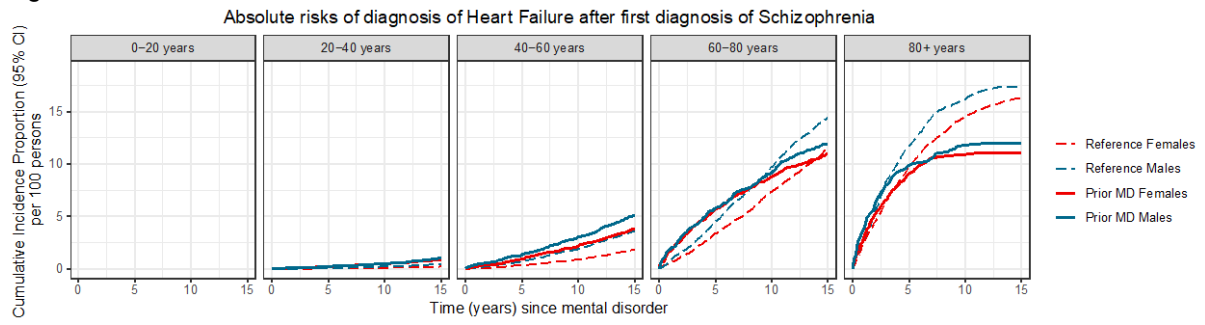

Figure S135.6 – Peripheral Artery Occlusive Disease

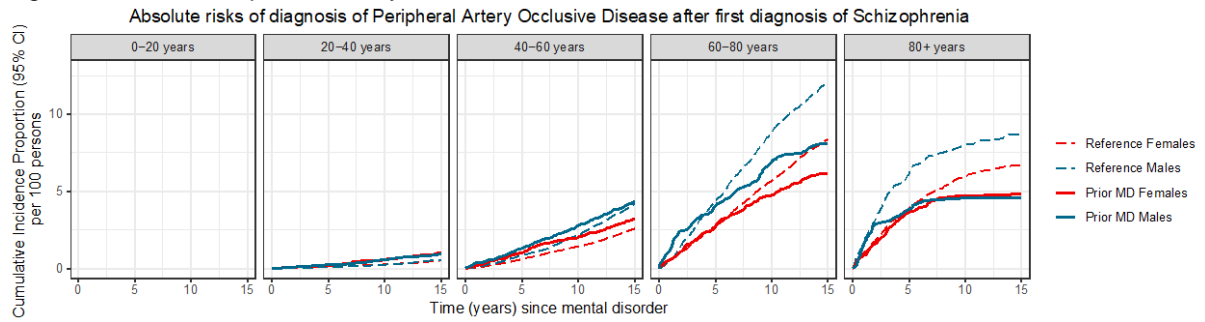

Figure S135.7 – Stroke

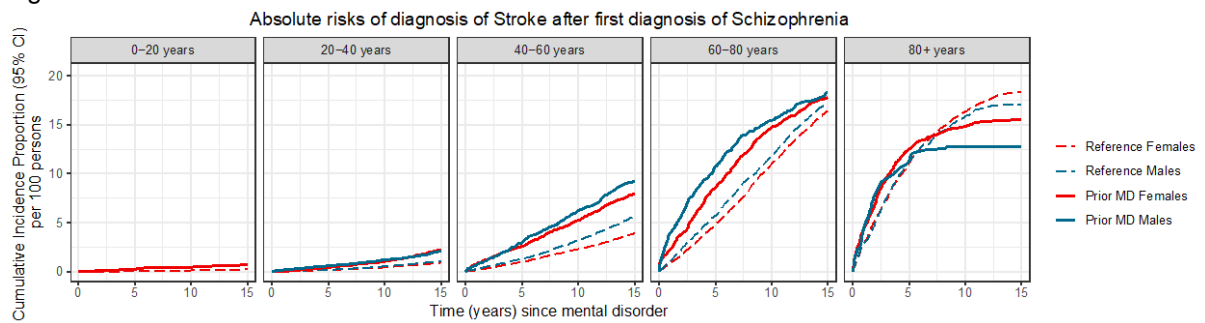

Figure S135.8 – Diabetes Mellitus

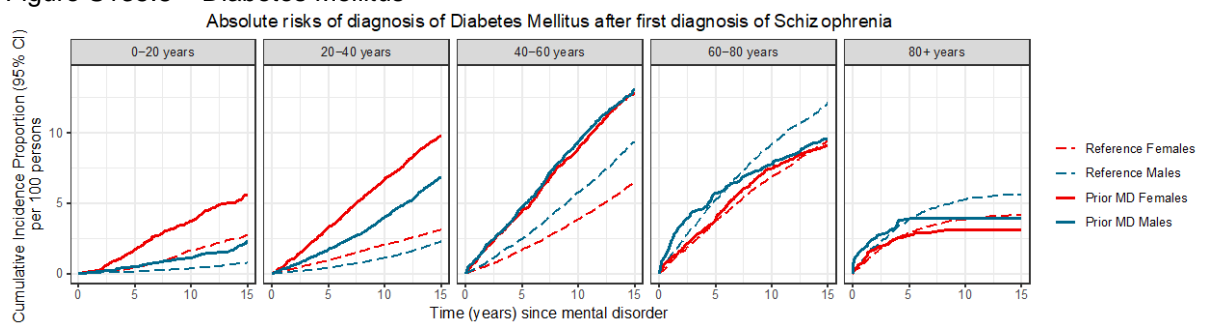

Figure S135.9 – Thyroid Disorders

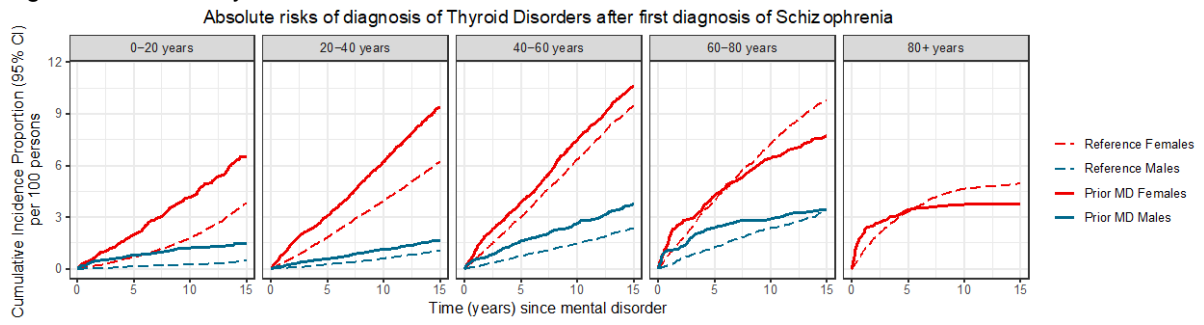

Figure S135.10 – Gout

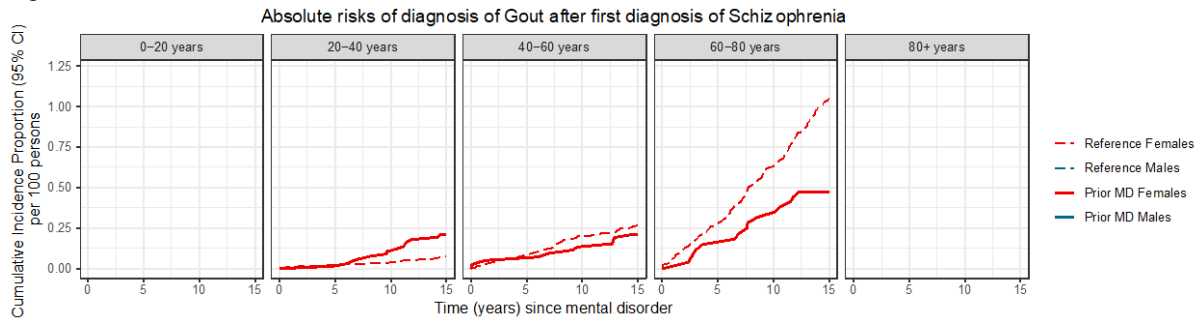

Figure S135.11 – Chronic Pulmonary Disease

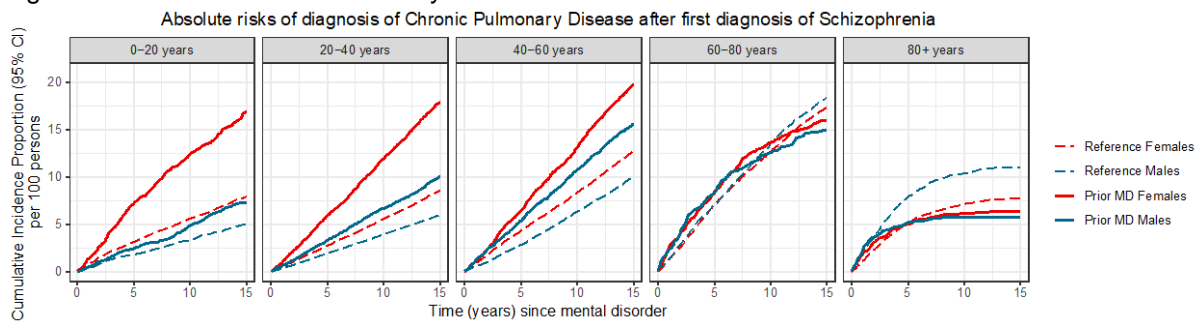

Figure S135.12 – Allergy

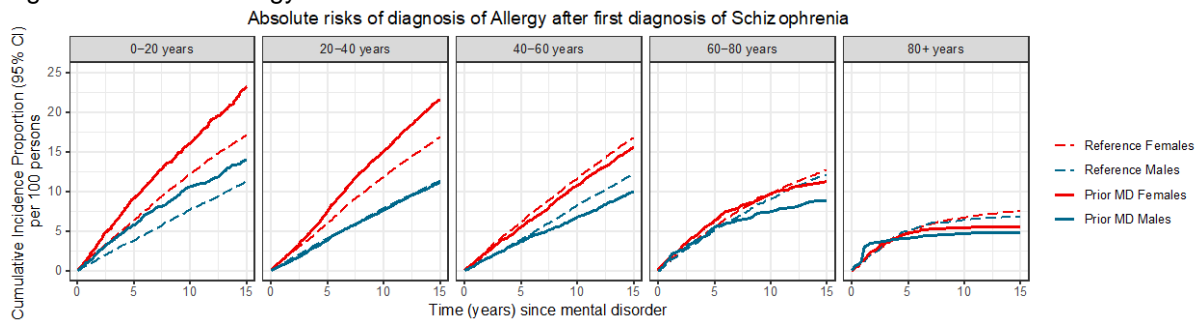

Figure S135.13 – Ulcer/Chronic Gastritis

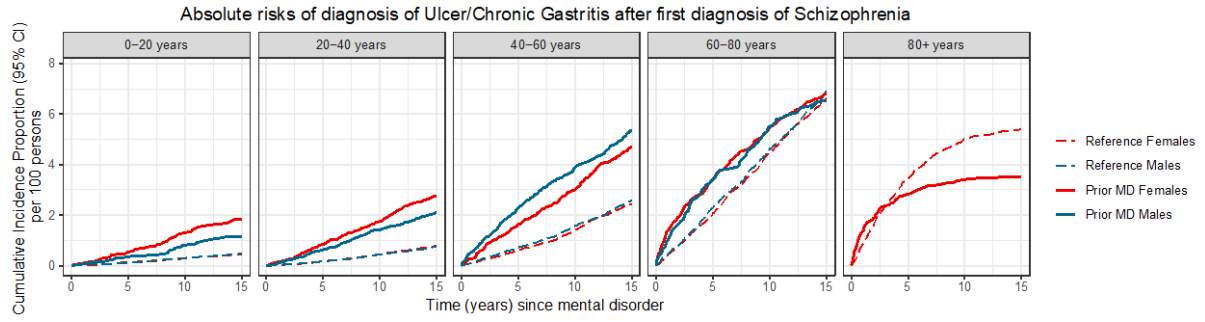

Figure S135.14 – Chronic Liver Disease

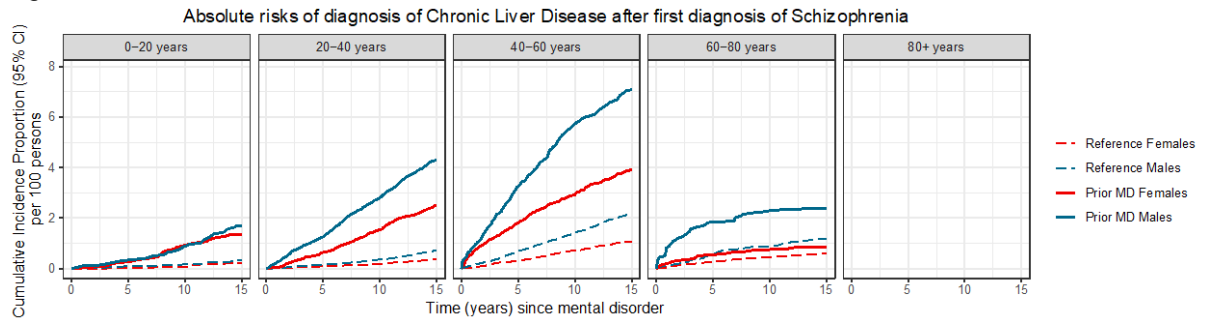

Figure S135.15 – Inflammatory Bowel Disease

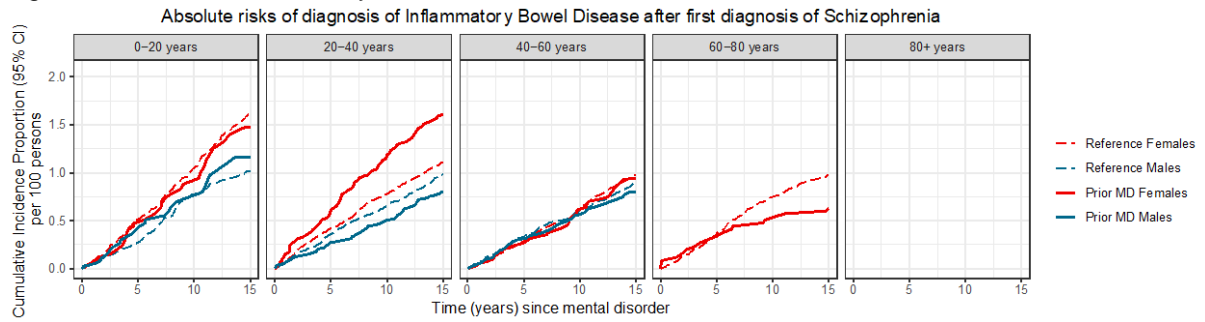

Figure S135.16 – Diverticular Disease of the Intestine

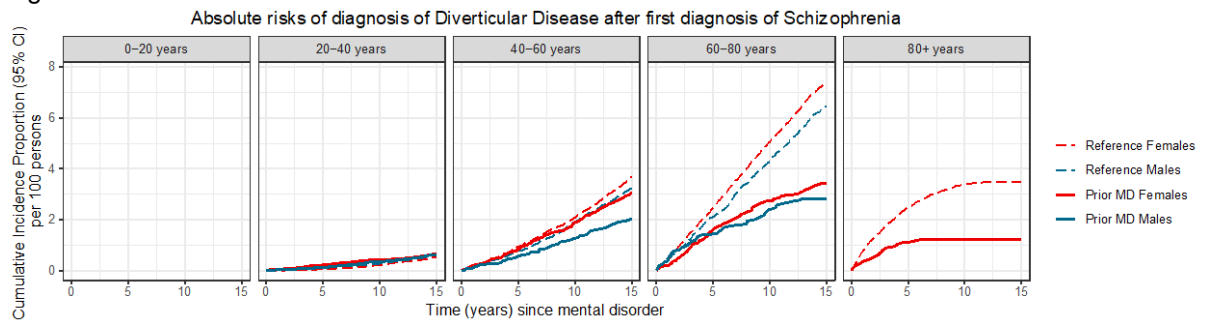

Figure S135.17 – Chronic Kidney Disease

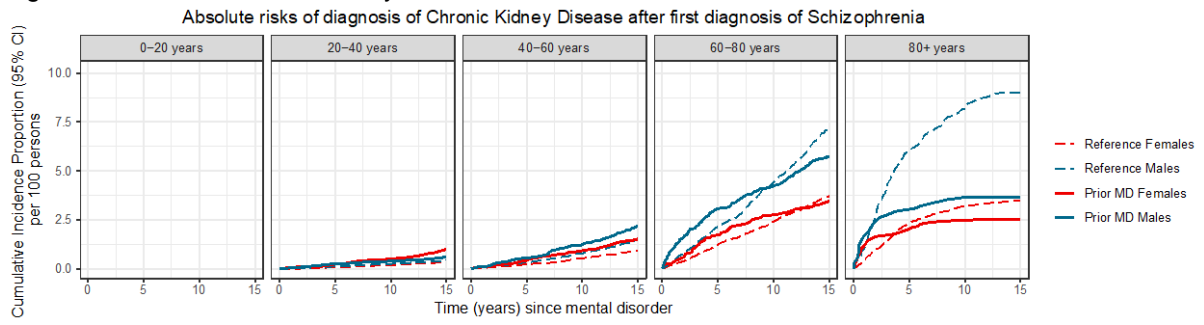

Figure S135.18 – Prostate Disorders

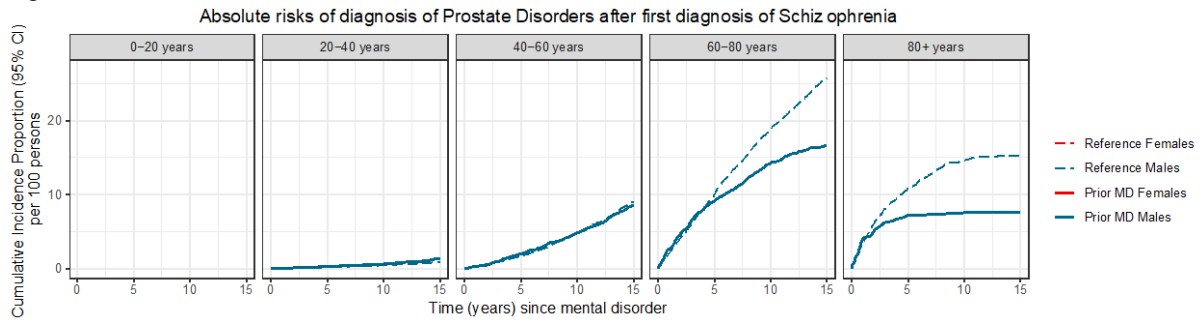

Figure S135.19 – Connective Tissue Disorders

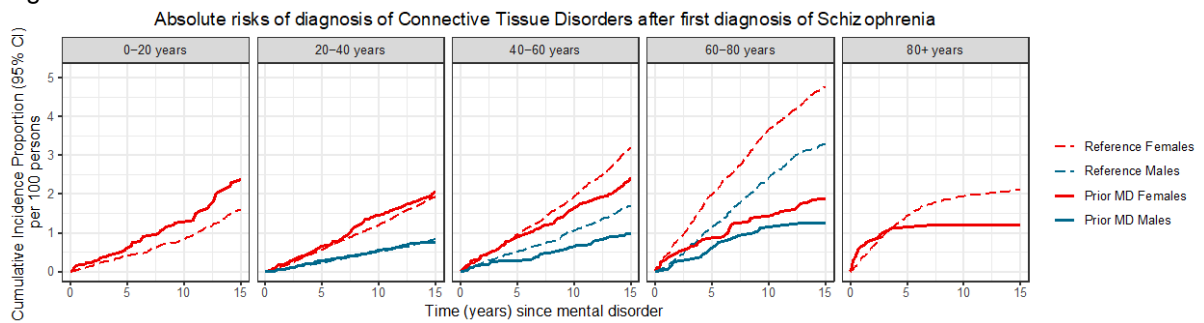

Figure S135.20 – Osteoporosis

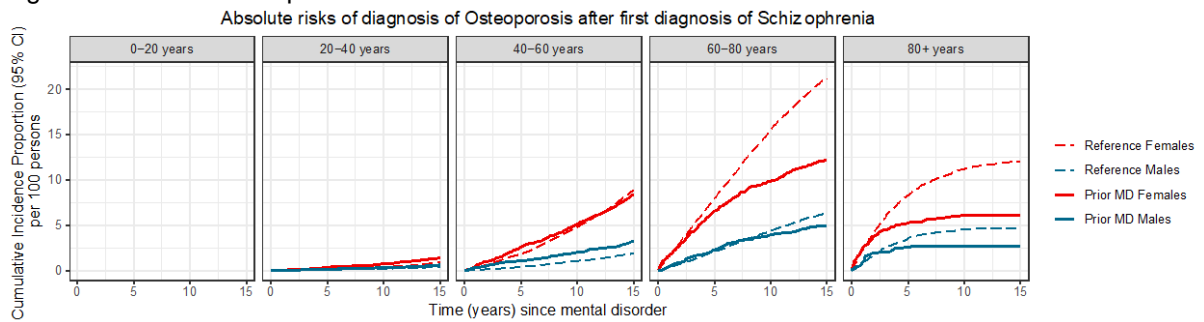

Figure S135.21 – Painful Conditions

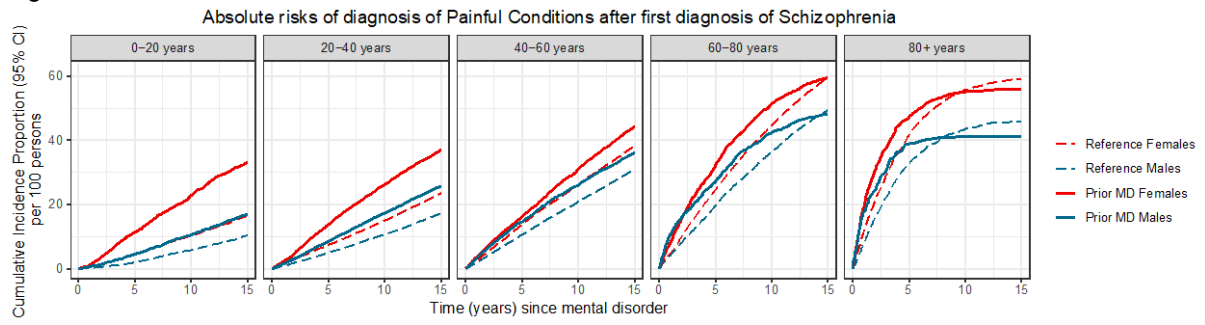

Figure S135.22 – HIV/AIDS

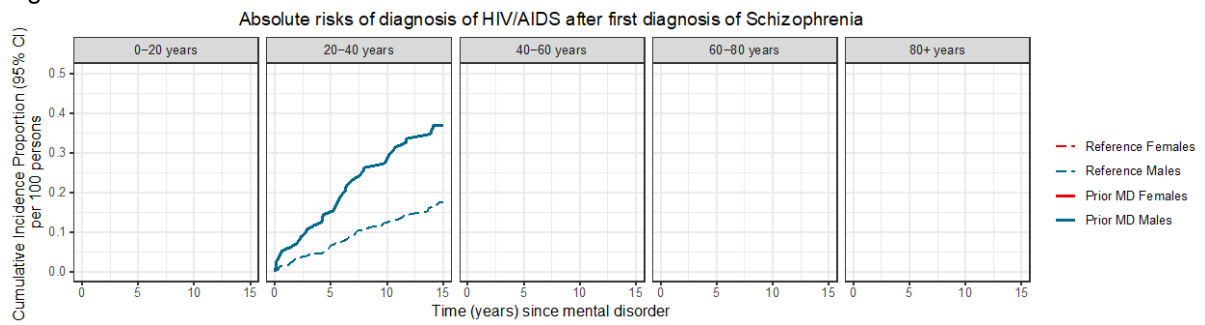

Figure S135.23 – Anemias

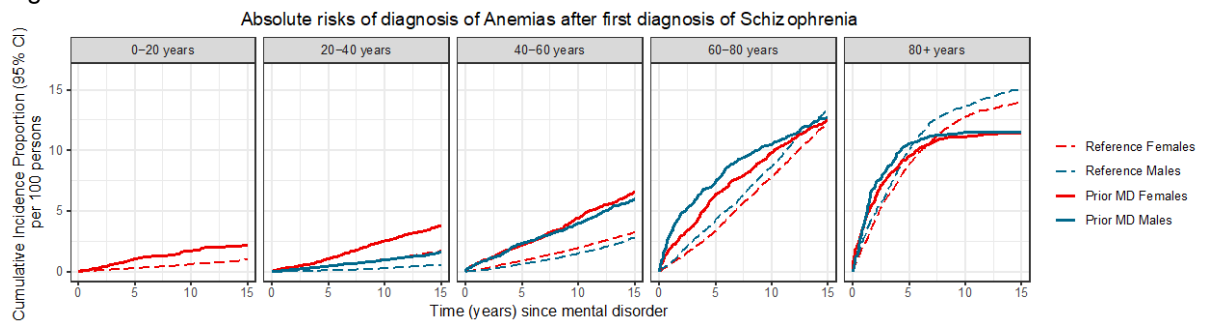

Figure S135.24 – Cancer

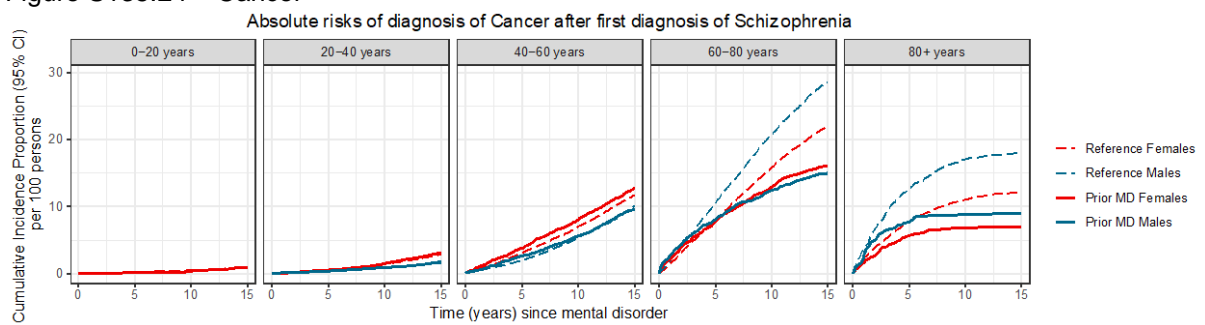

Figure S135.25 – Vision Problems

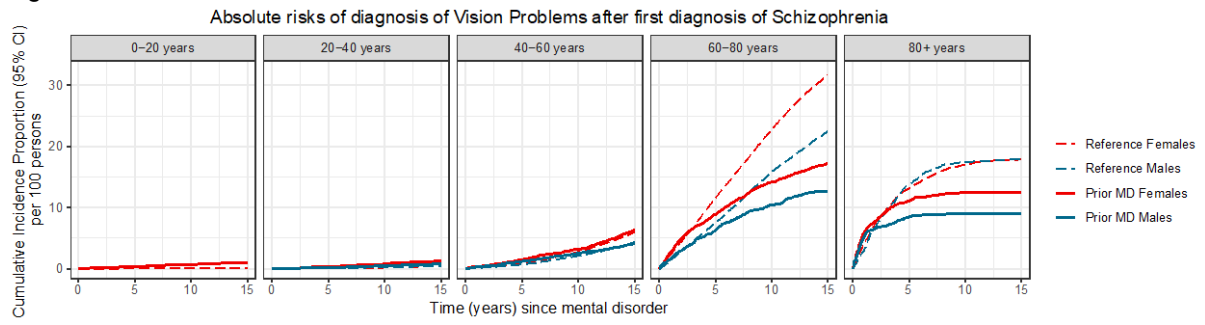

Figure S135.26 – Hearing Problems

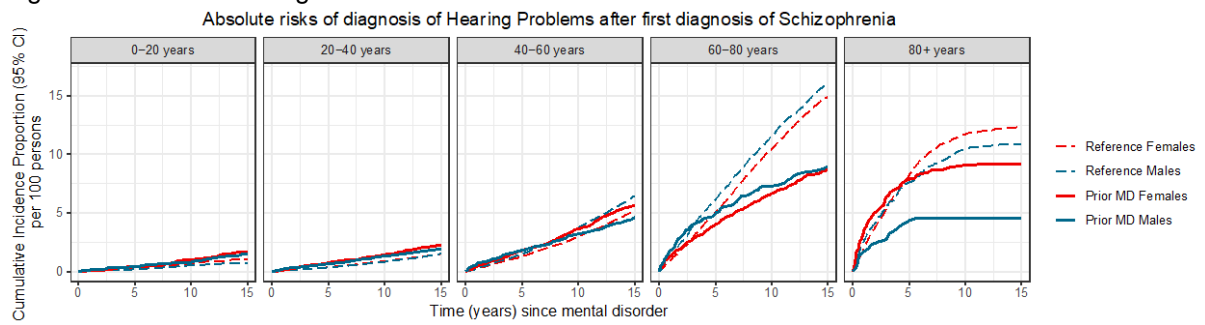

Figure S135.27 – Migraine

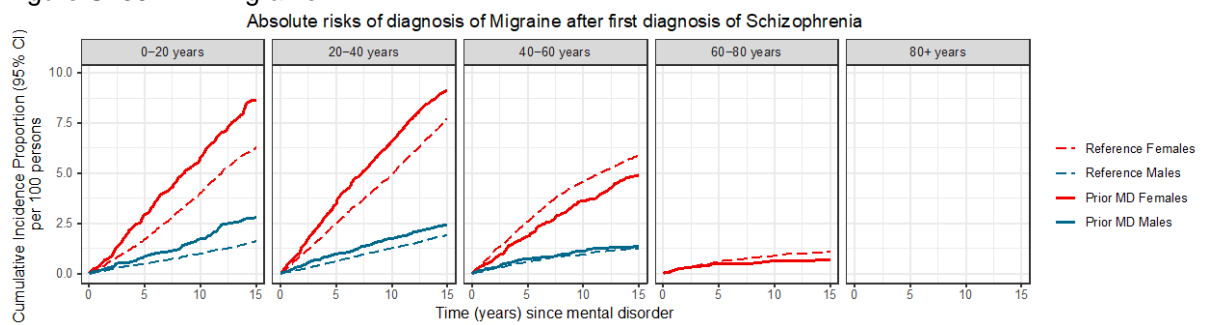

Figure S135.28 – Epilepsy

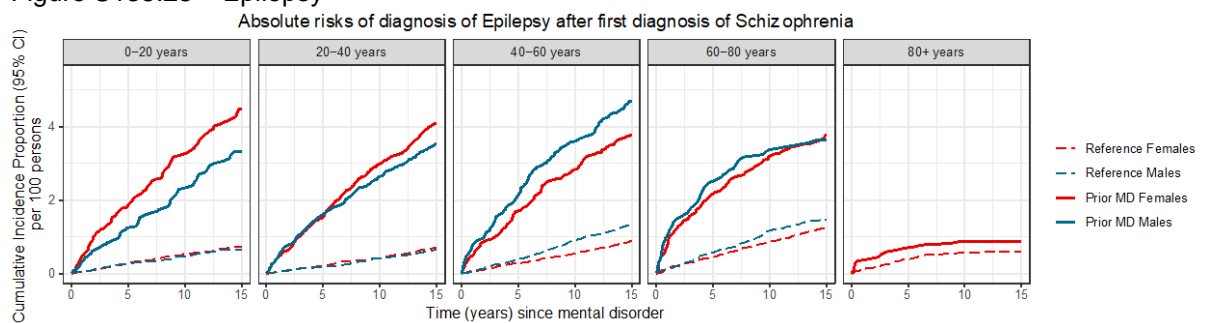

Figure S135.29 – Parkinson's Disease

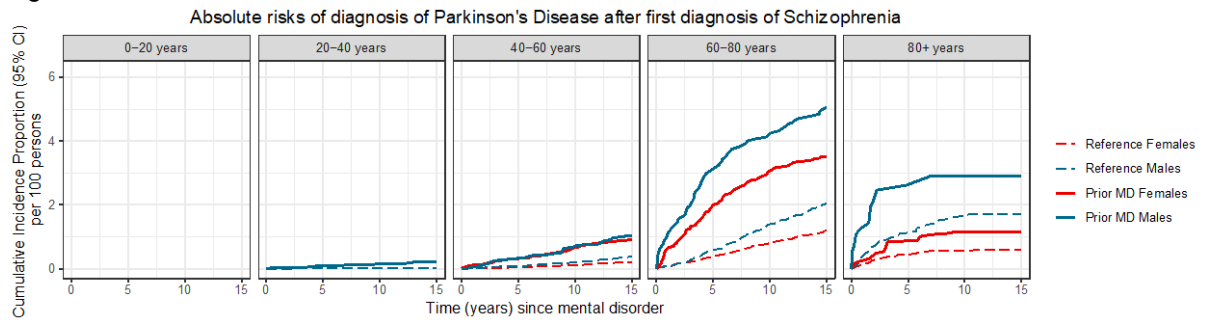

Figure S135.30 – Multiple Sclerosis

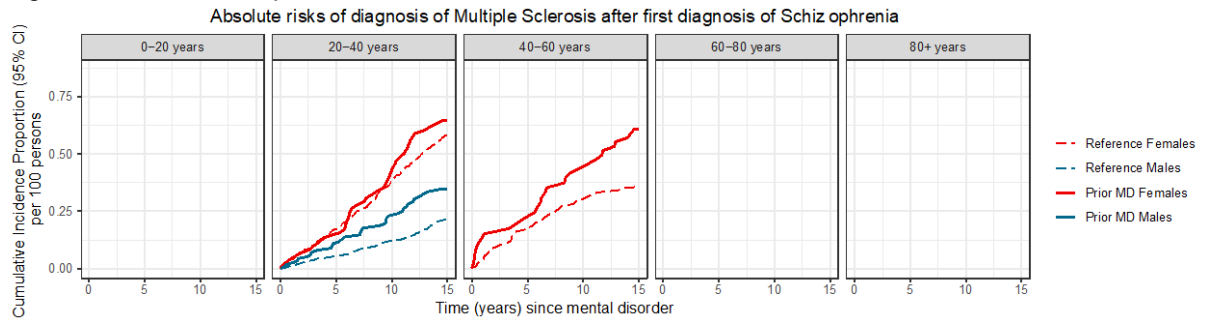

Figure S135.31 – Neuropathies

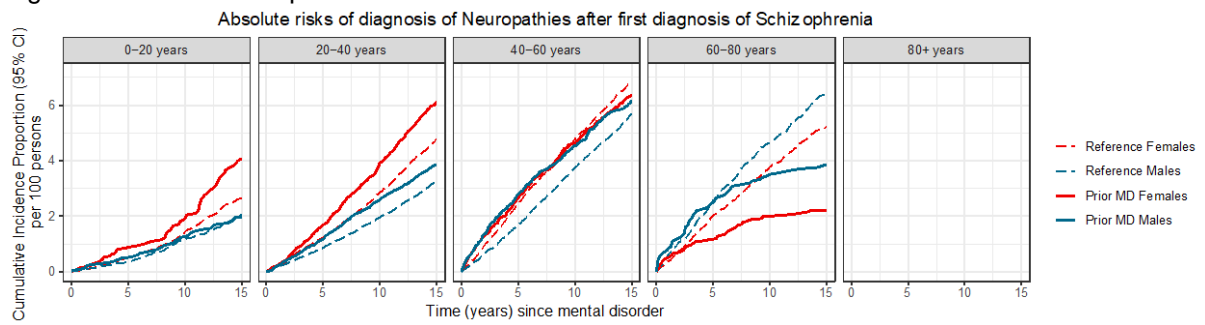



**Figures S136.1-S136.31. Sex-specific absolute risks of being diagnosed with general medical conditions after a first diagnosis of Mood Disorders**

**Figure S136.1 - Hypertension**

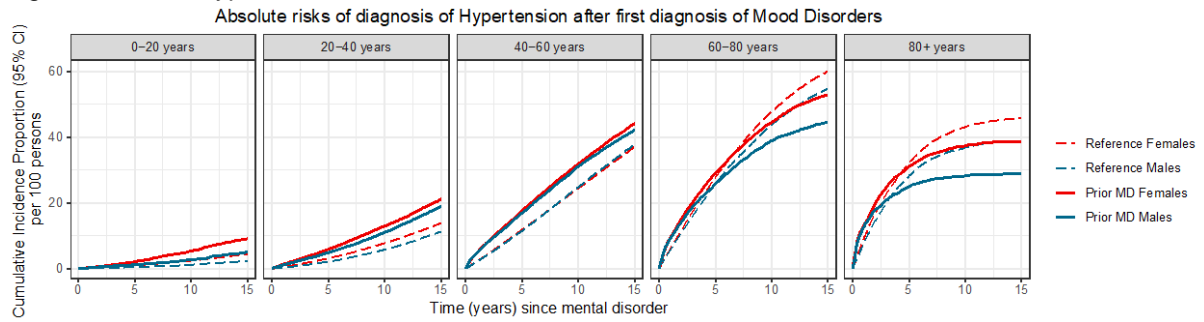

**Figure S136.2 – Dyslipidemia**

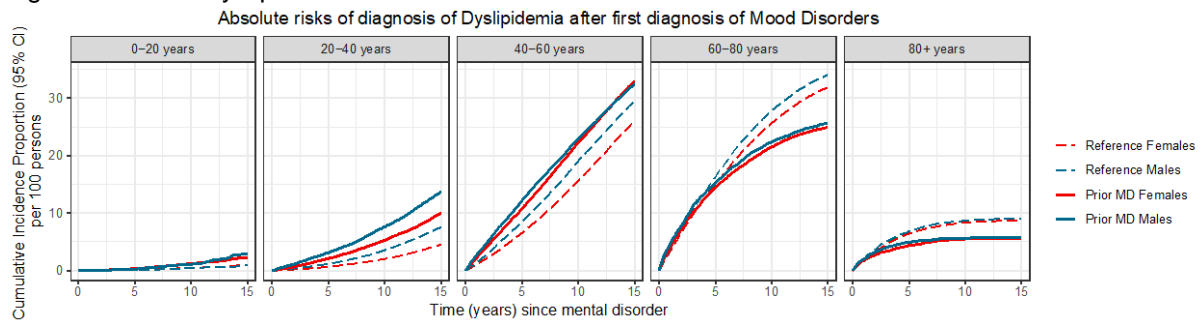

**Figure S136.3 – Ischemic Heart Disease**

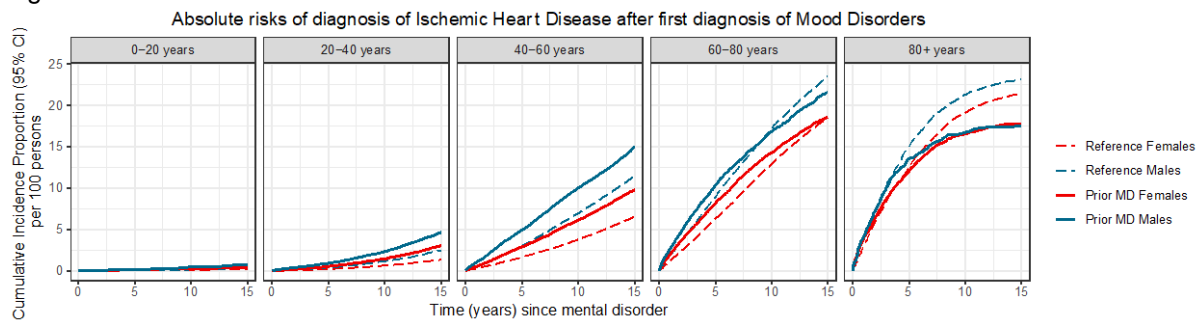

**Figure S136.4 – Atrial Fibrillation**

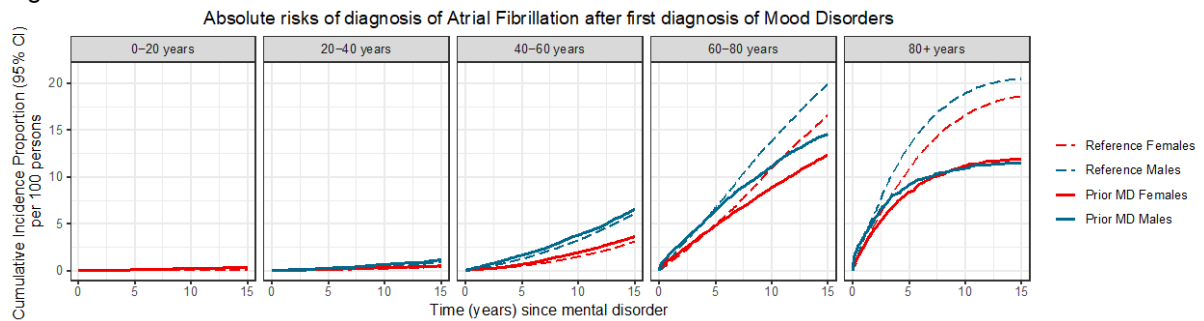

Figure S136.5 – Heart Failure

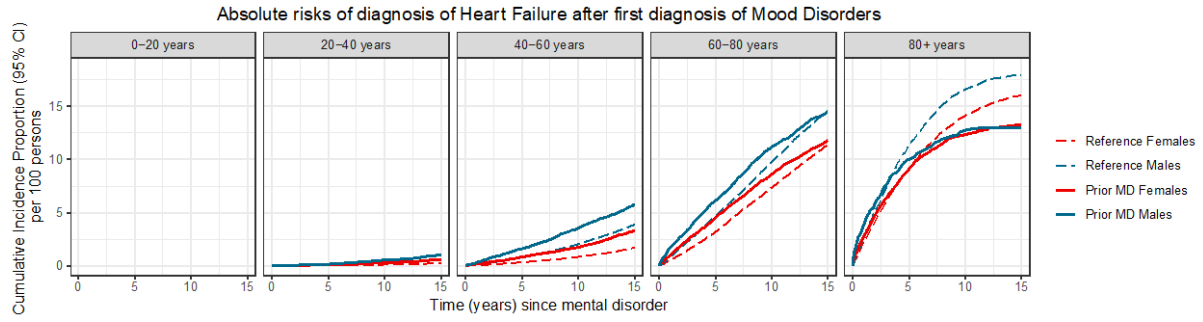

Figure S136.6 – Peripheral Artery Occlusive Disease

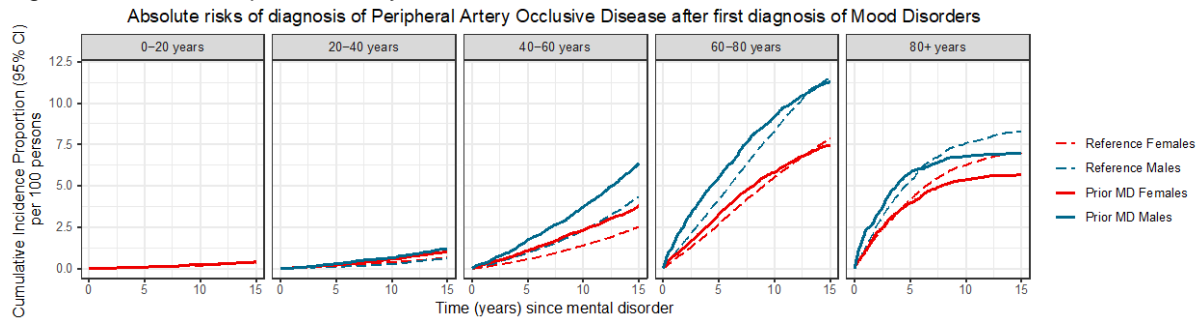

Figure S136.7 – Stroke

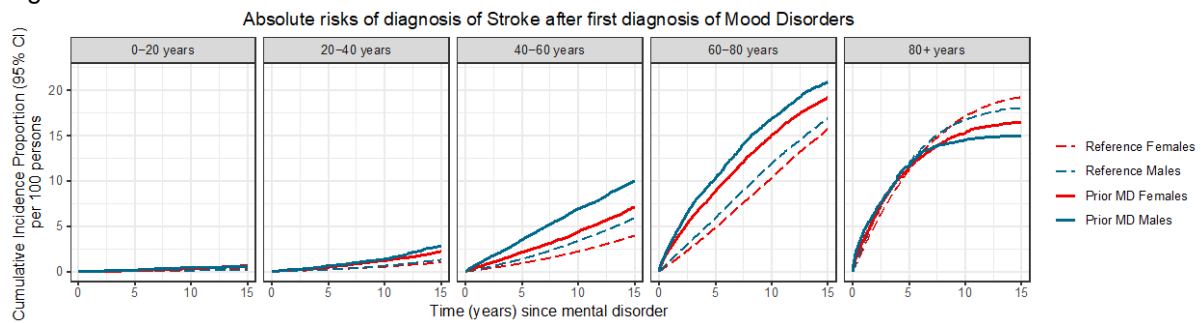

Figure S136.8 – Diabetes Mellitus

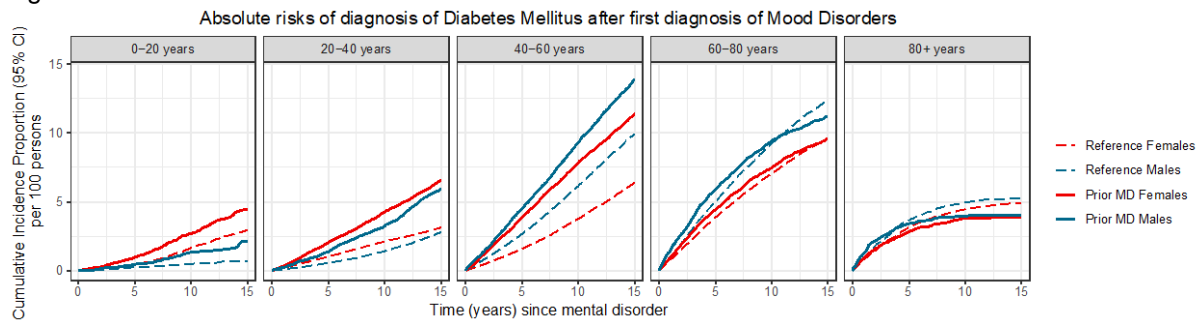

Figure S136.9 – Thyroid Disorders

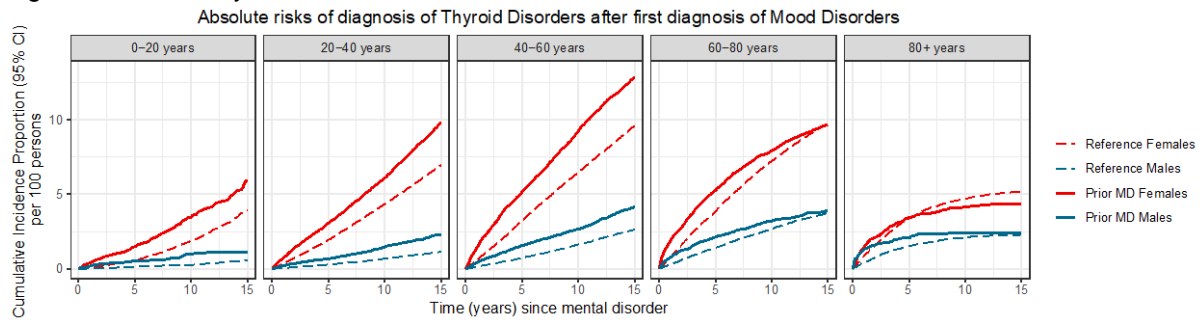

Figure S136.10 – Gout

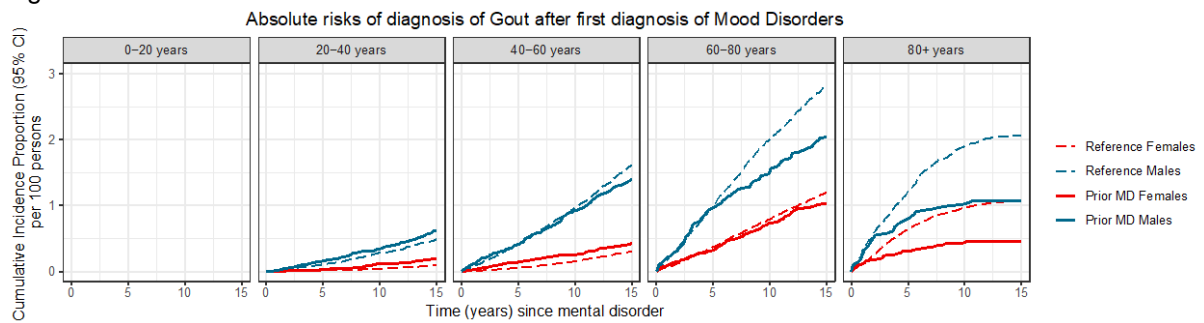

Figure S136.11 – Chronic Pulmonary Disease

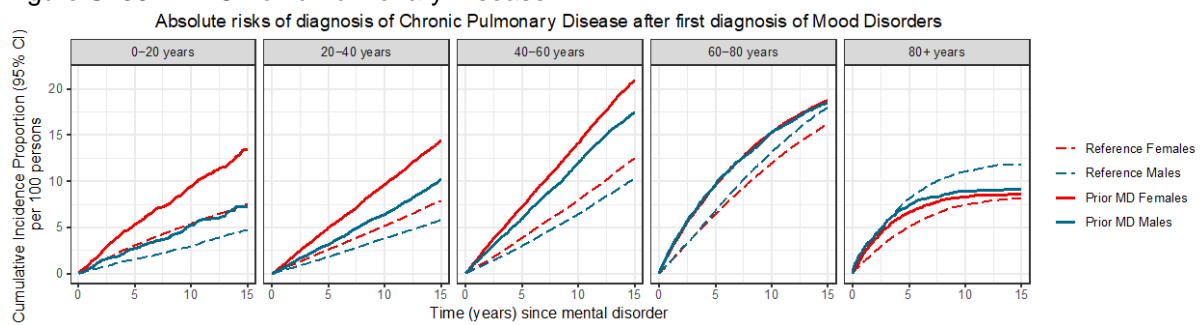

Figure S136.12 – Allergy

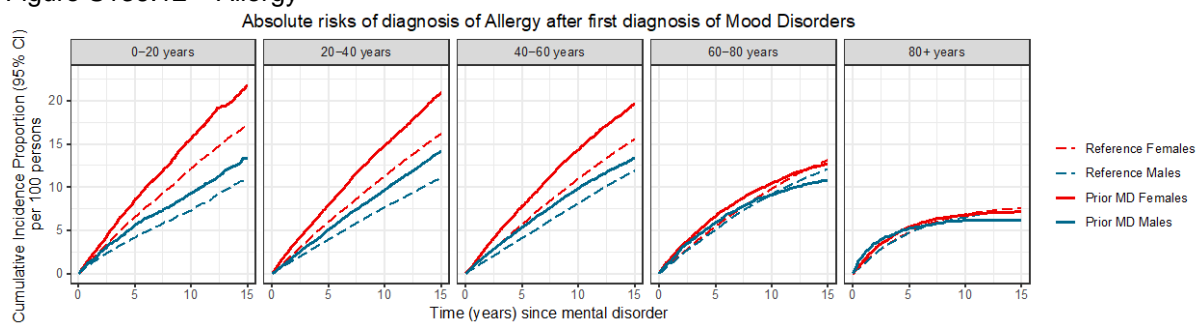

Figure S136.13 – Ulcer/Chronic Gastritis

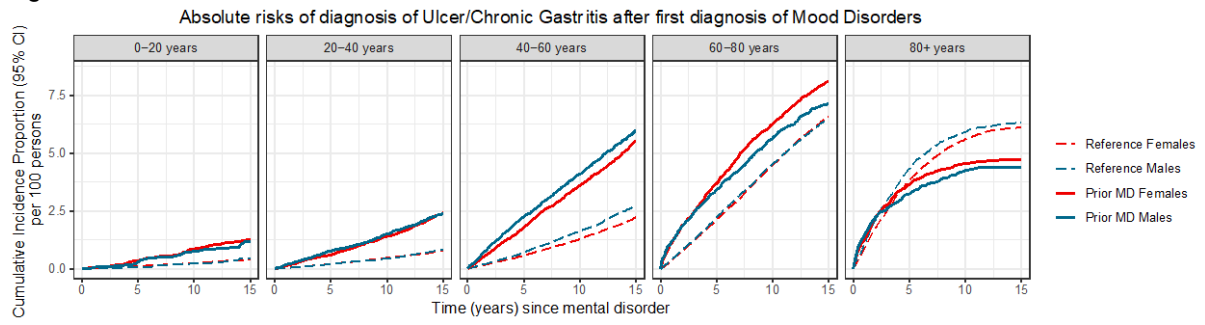

Figure S136.14 – Chronic Liver Disease

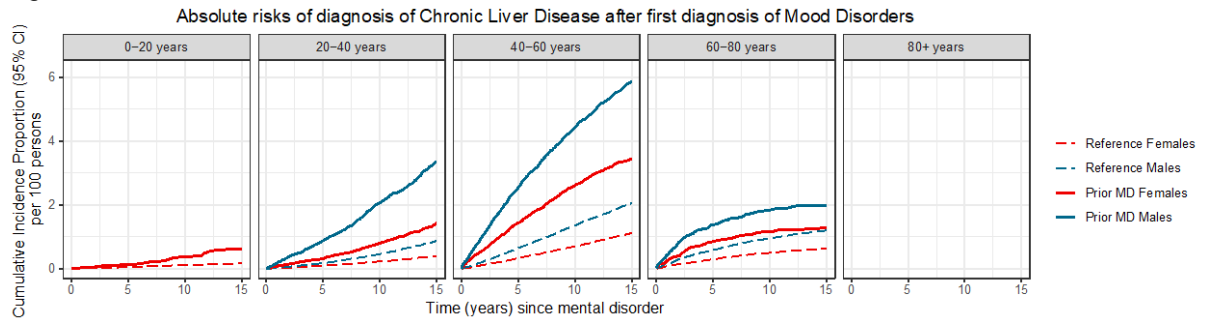

Figure S136.15 – Inflammatory Bowel Disease

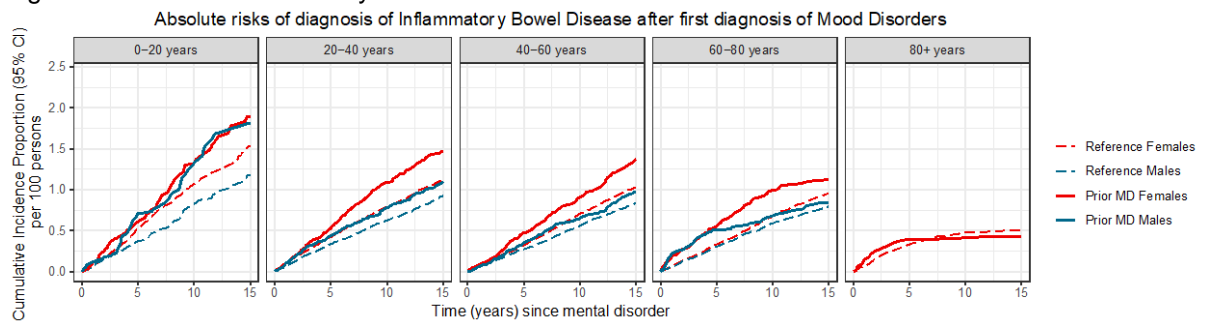

Figure S136.16 – Diverticular Disease of the Intestine

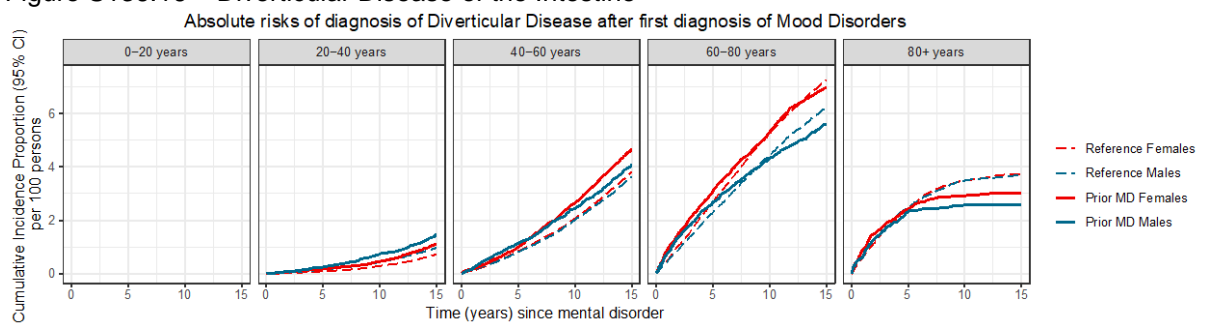

Figure S136.17 – Chronic Kidney Disease

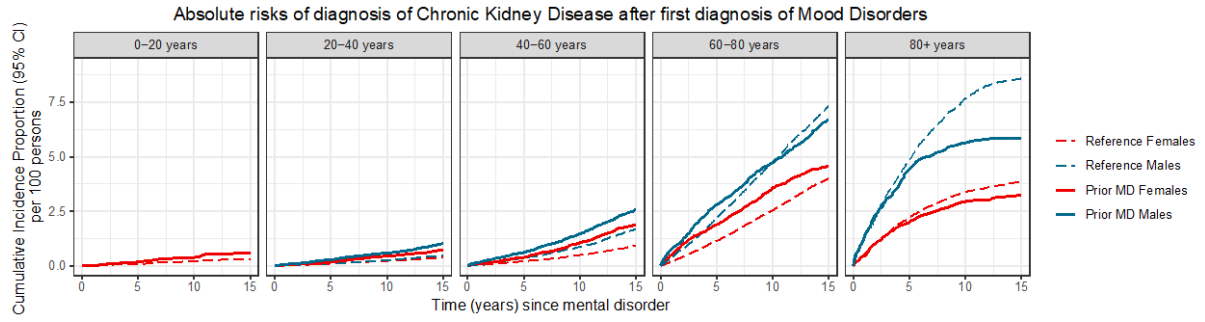

Figure S136.18 – Prostate Disorders

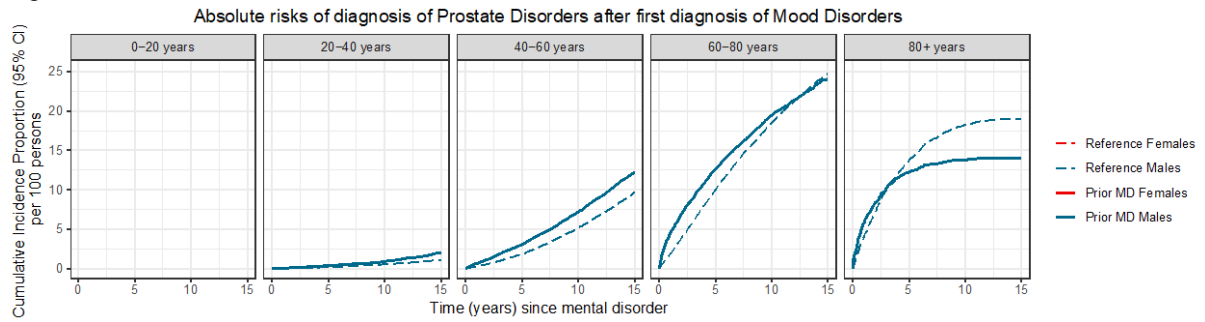

Figure S136.19 – Connective Tissue Disorders

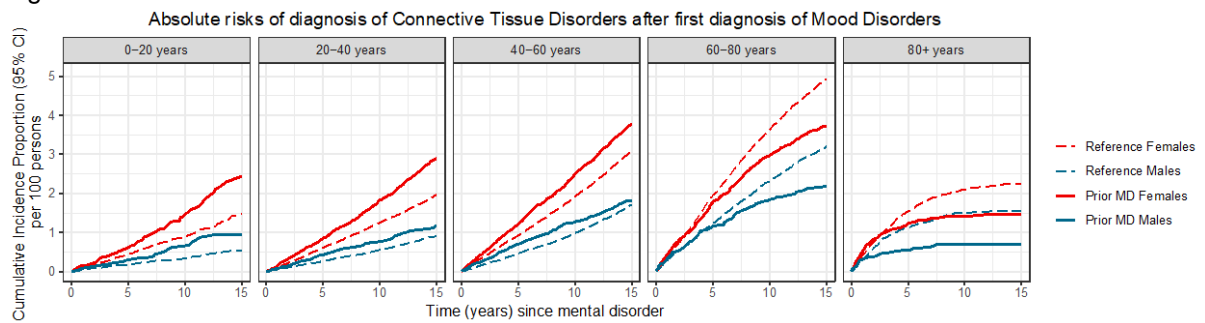

Figure S136.20 – Osteoporosis

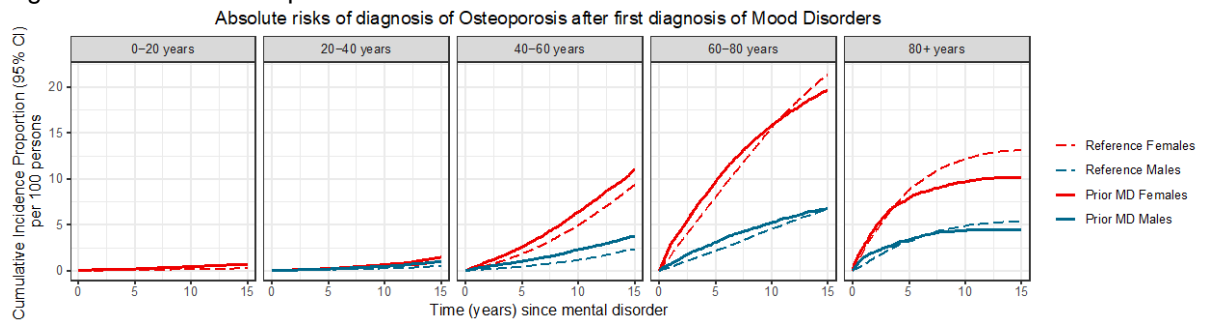

Figure S136.21 – Painful Conditions

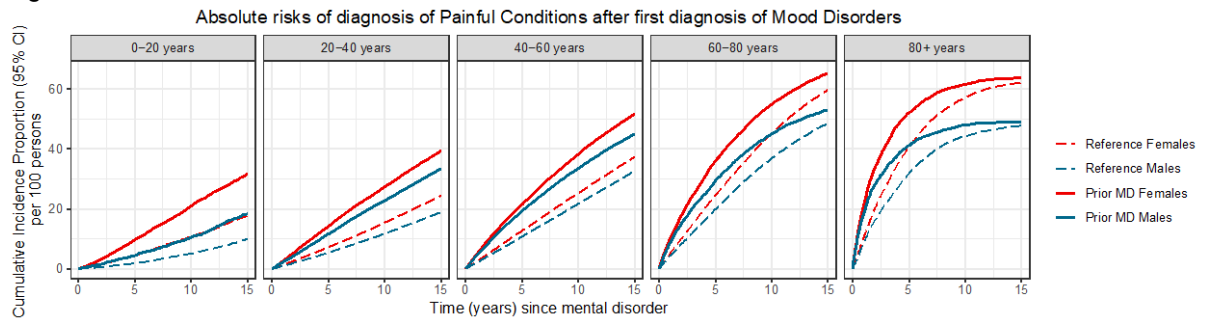

Figure S136.22 – HIV/AIDS

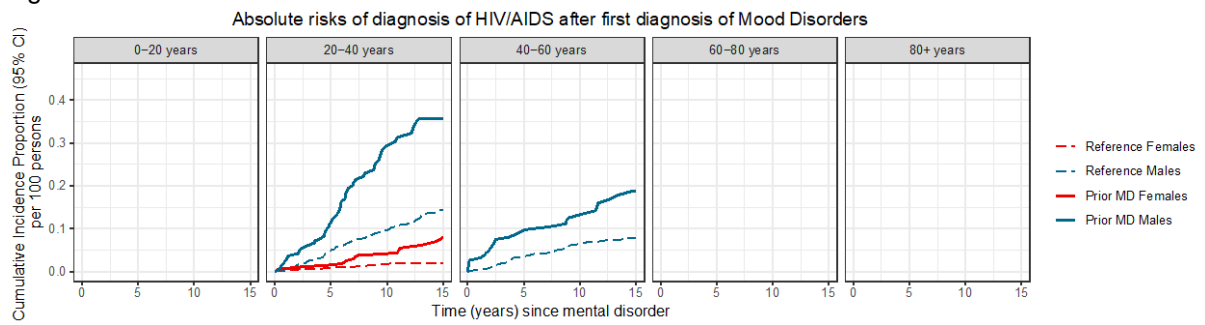

Figure S136.23 – Anemias

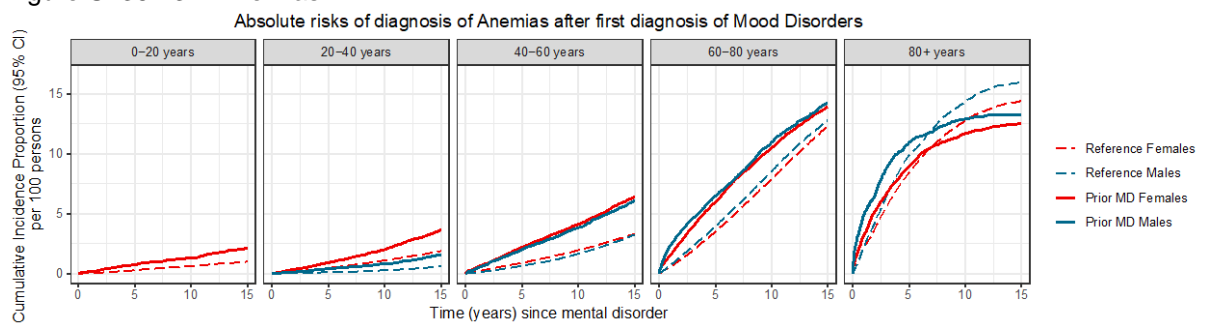

Figure S136.24 – Cancer

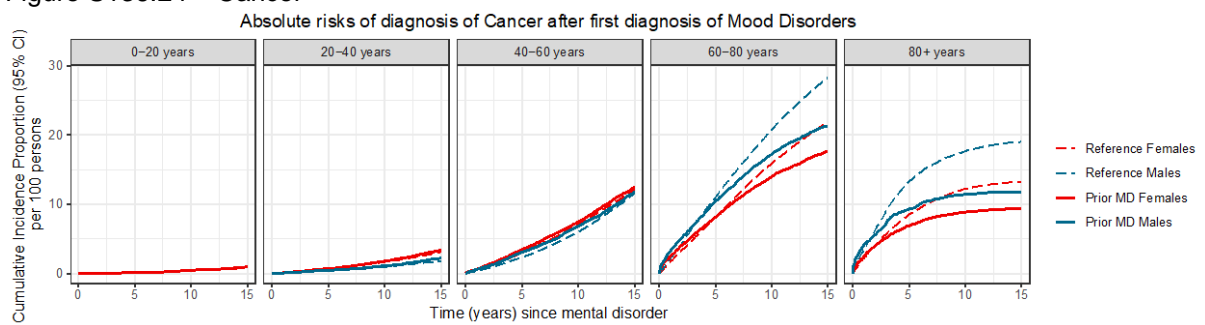

Figure S136.25 – Vision Problems

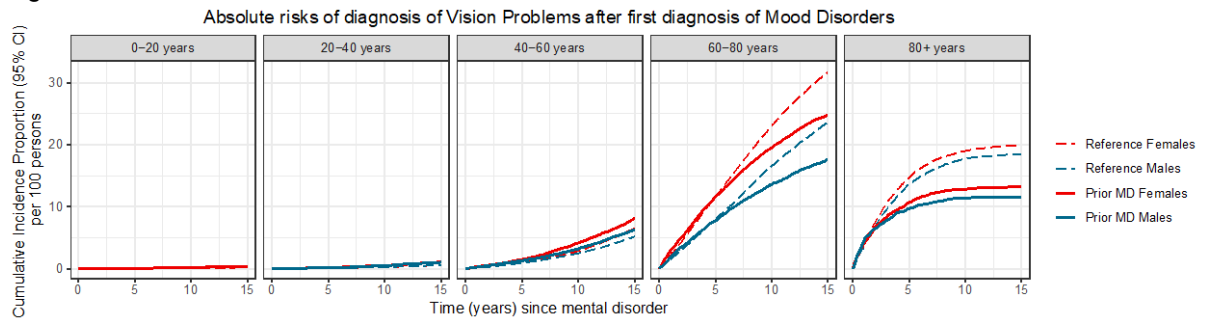

Figure S136.26 – Hearing Problems

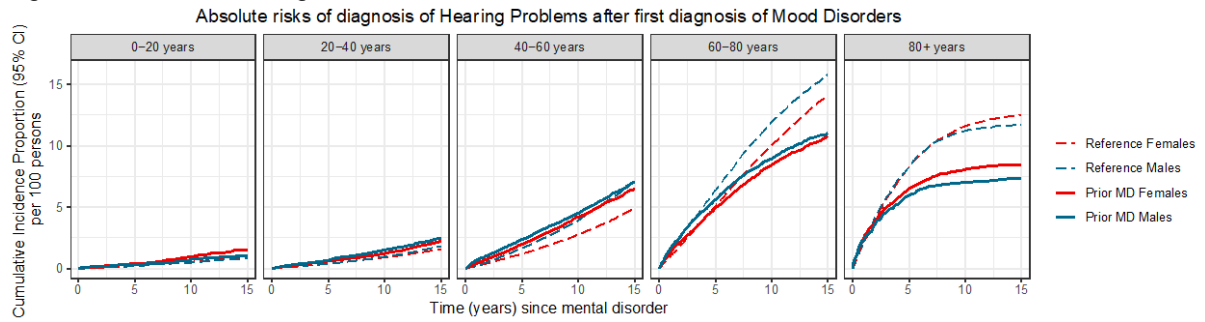

Figure S136.27 – Migraine

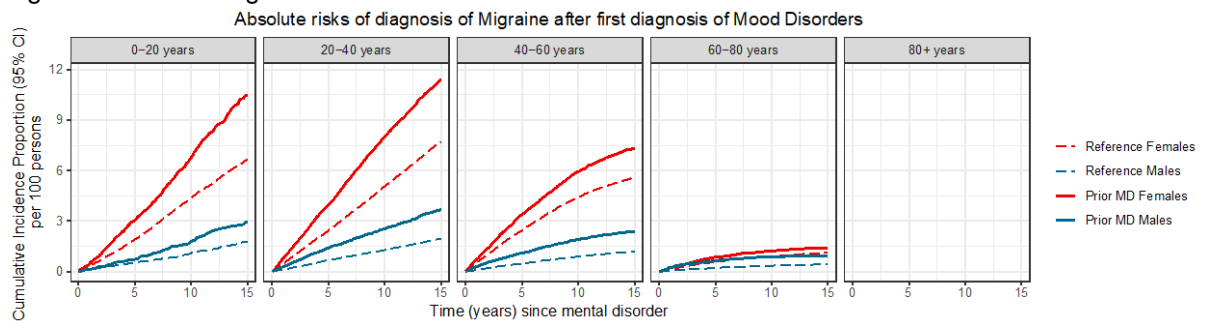

Figure S136.28 – Epilepsy

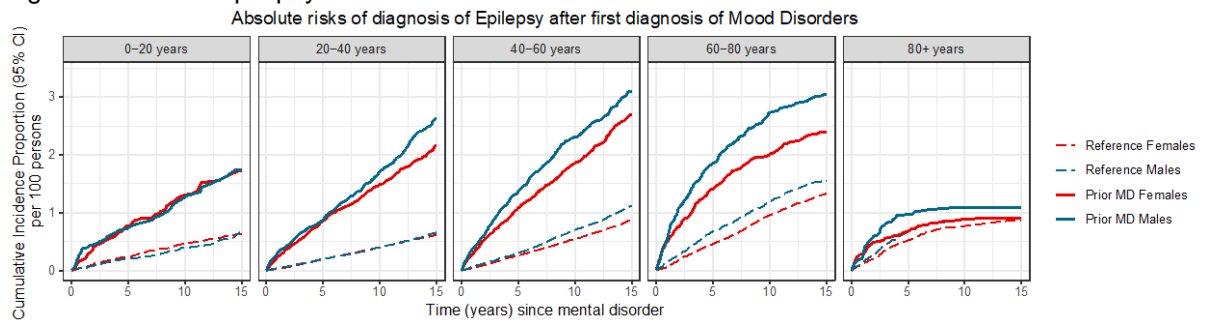

Figure S136.29 – Parkinson's Disease

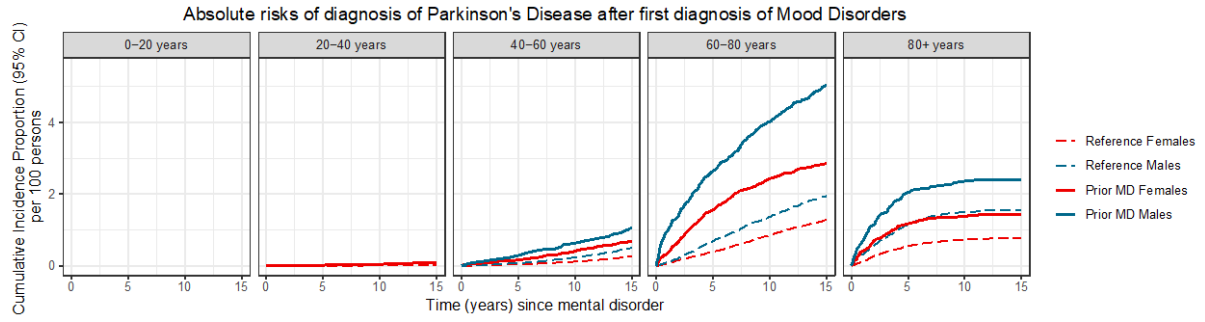

Figure S136.30 – Multiple Sclerosis

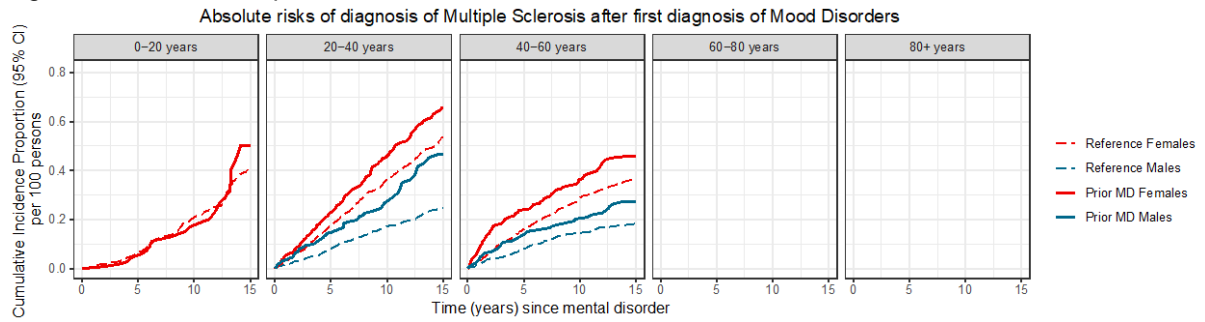

Figure S136.31 – Neuropathies

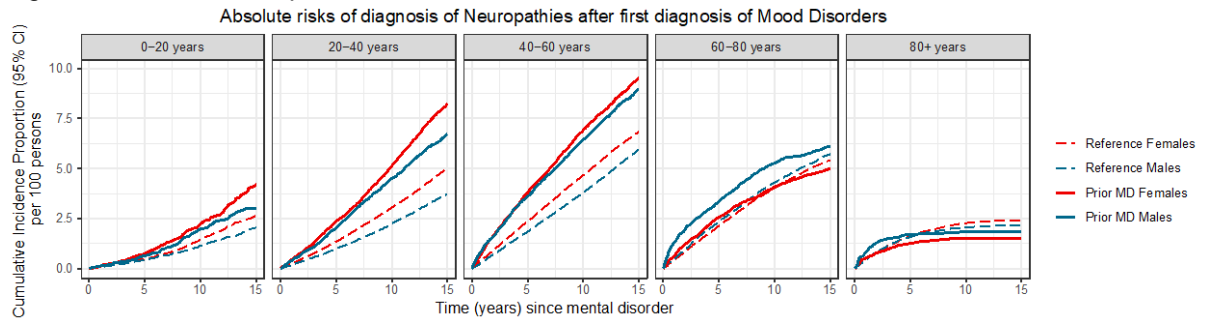



**Figures S137.1-S137.31. Sex-specific absolute risks of being diagnosed with general medical conditions after a first diagnosis of Neurotic Disorders**

**Figure S137.1 - Hypertension**

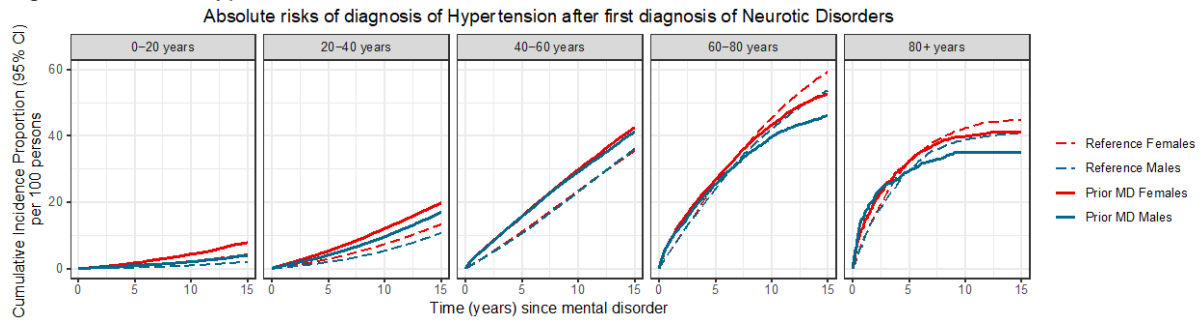

**Figure S137.2 – Dyslipidemia**

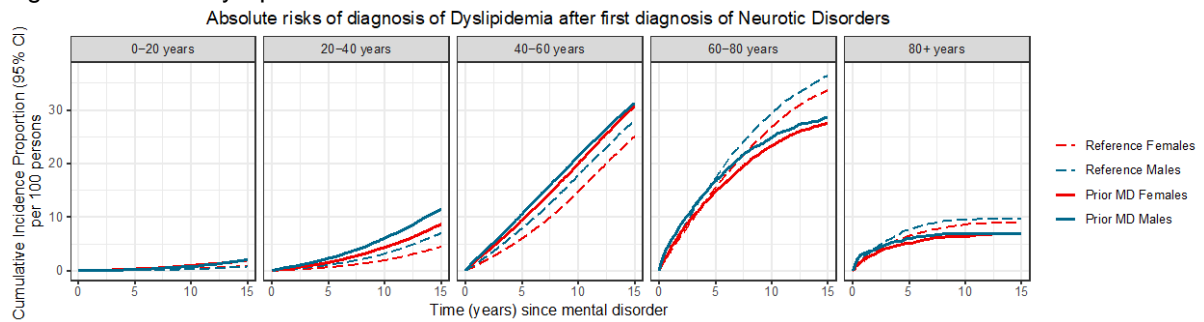

**Figure S137.3 – Ischemic Heart Disease**

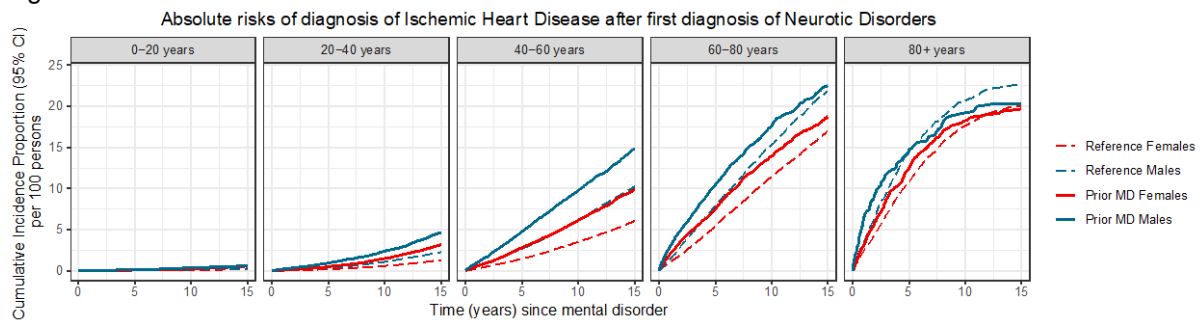

**Figure S137.4 – Atrial Fibrillation**

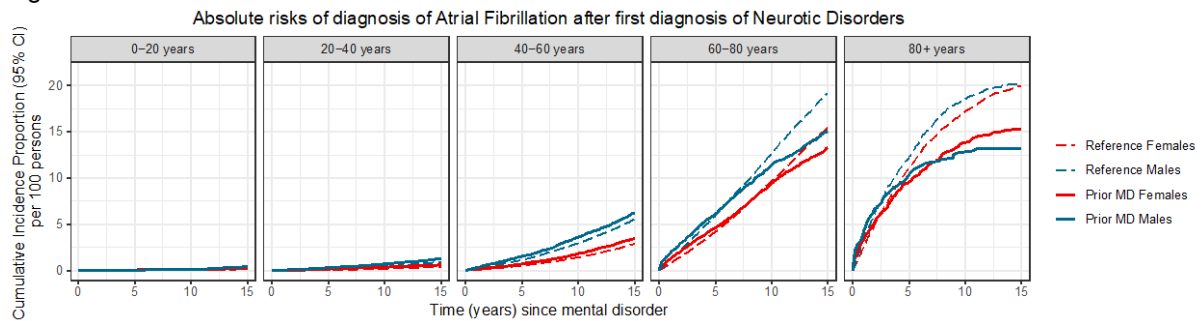

Figure S137.5 – Heart Failure

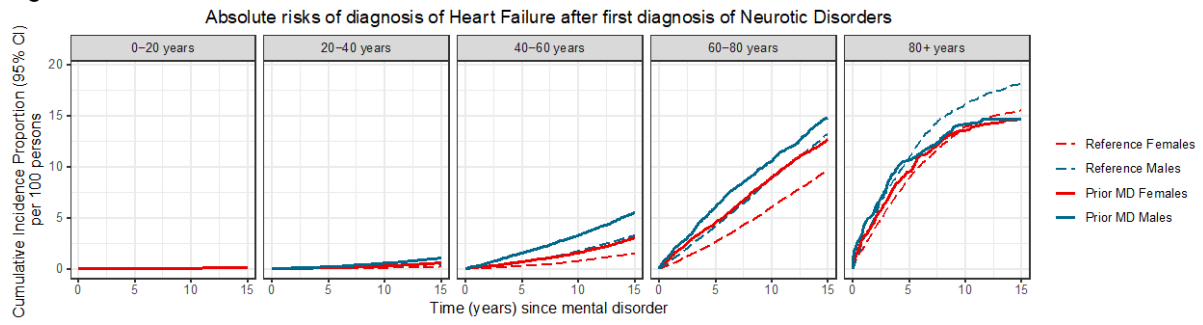

Figure S137.6 – Peripheral Artery Occlusive Disease

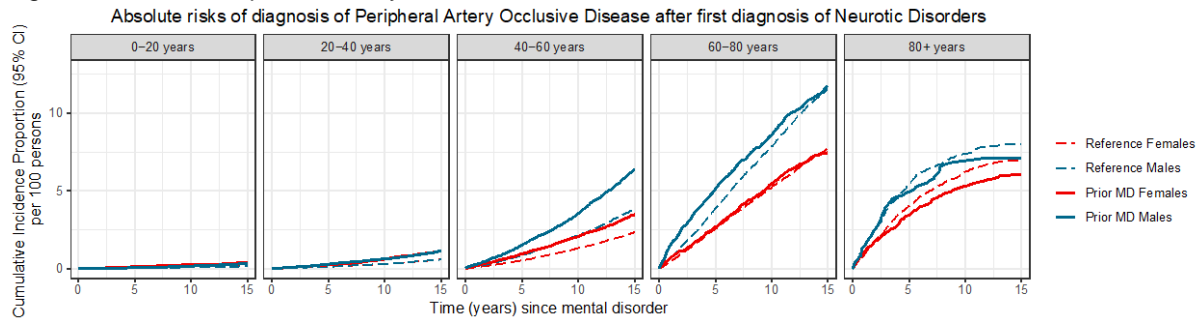

Figure S137.7 – Stroke

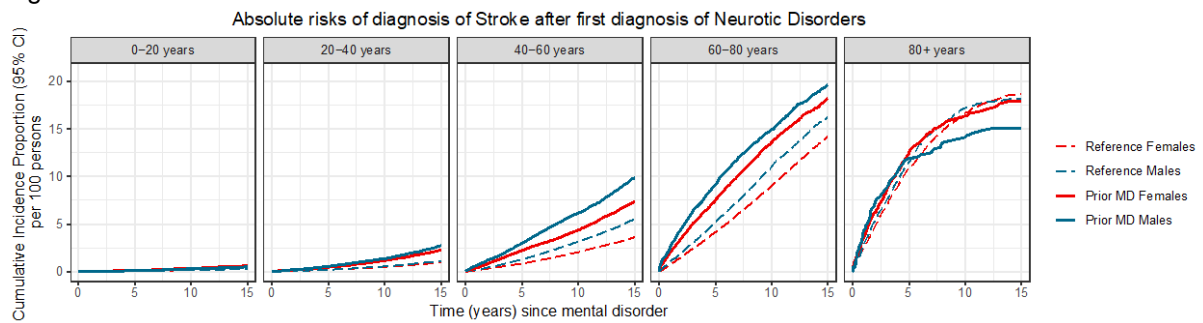

Figure S137.8 – Diabetes Mellitus

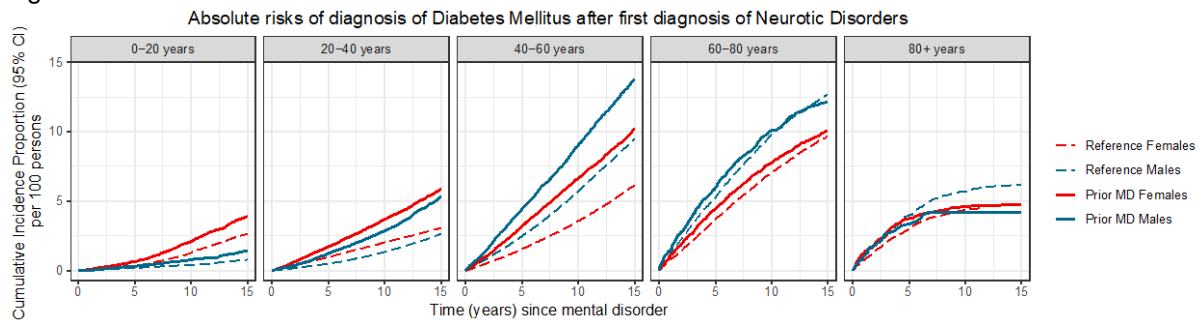

Figure S137.9 – Thyroid Disorders

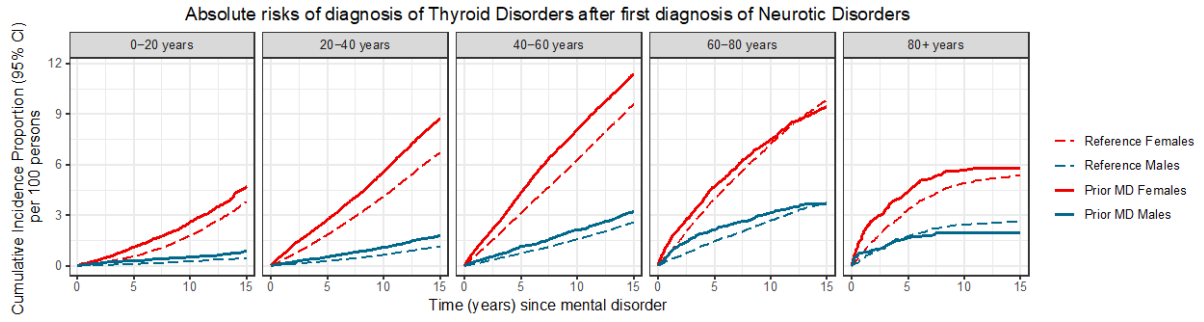

Figure S137.10 – Gout

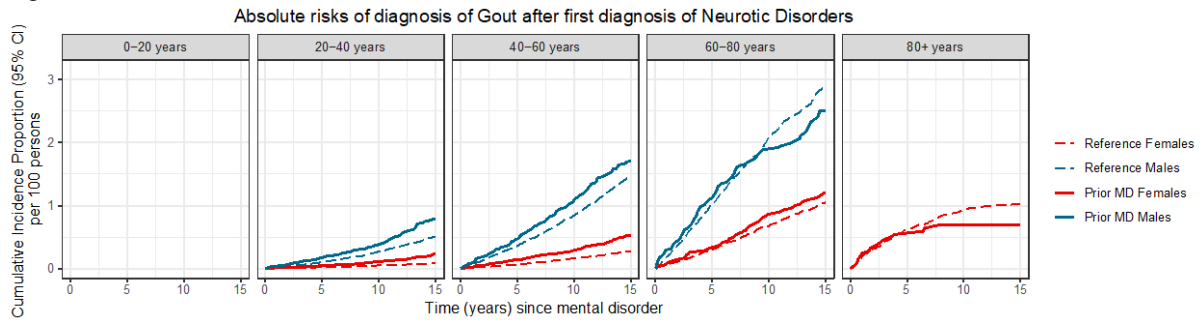

Figure S137.11 – Chronic Pulmonary Disease

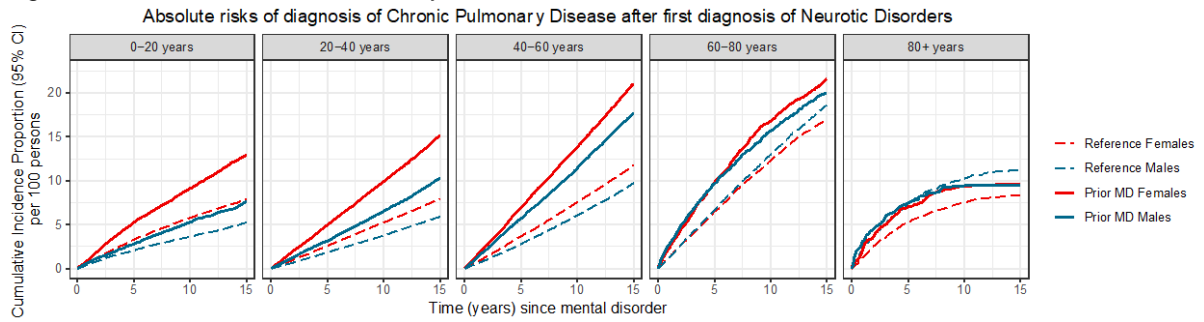

Figure S137.12 – Allergy

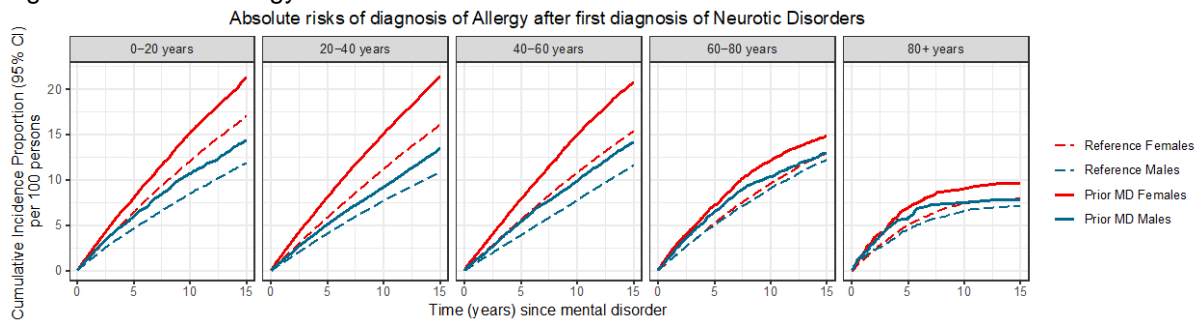

Figure S137.13 – Ulcer/Chronic Gastritis

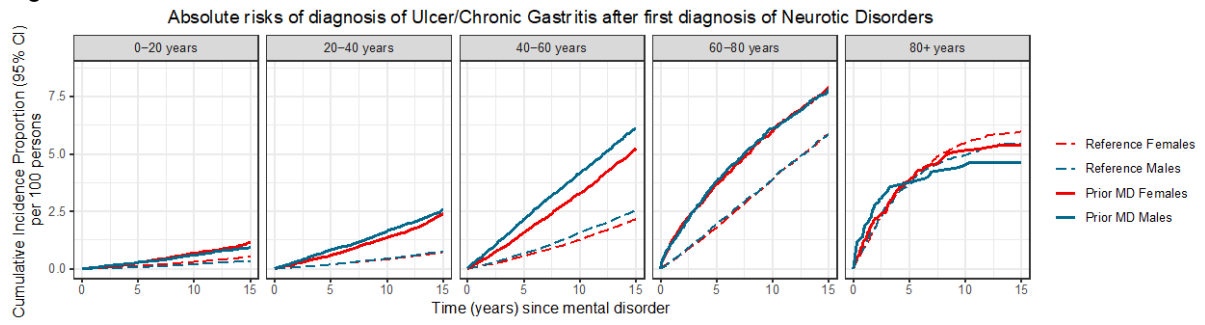

Figure S137.14 – Chronic Liver Disease

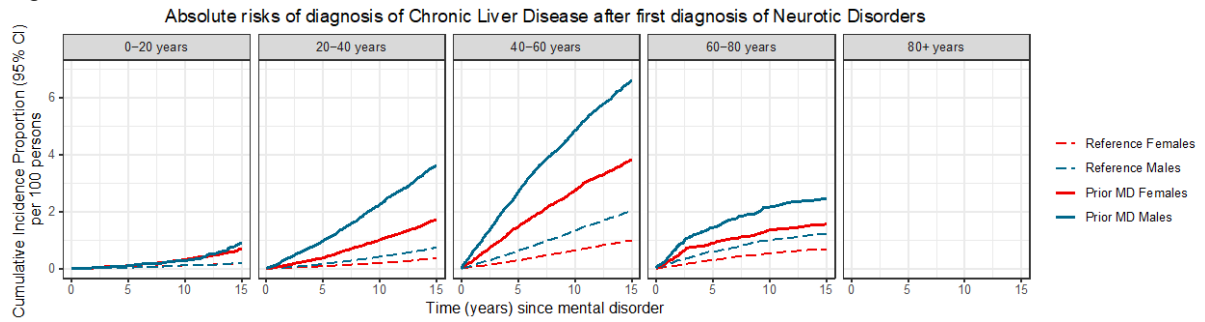

Figure S137.15 – Inflammatory Bowel Disease

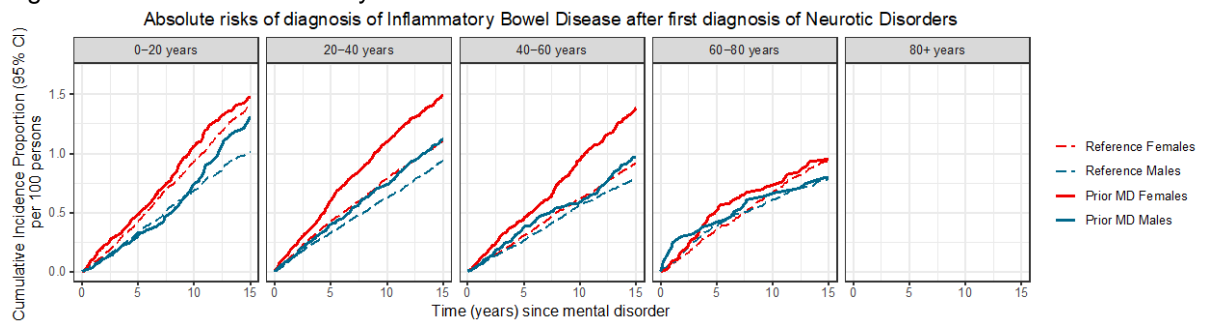

Figure S137.16 – Diverticular Disease of the Intestine

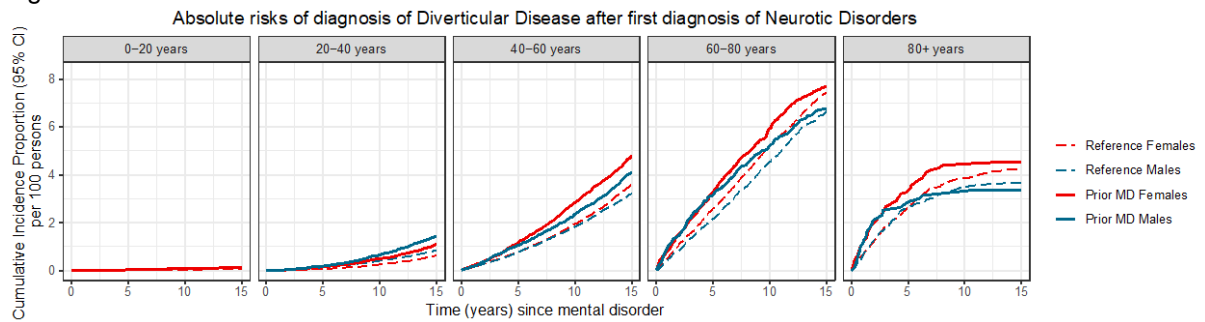

Figure S137.17 – Chronic Kidney Disease

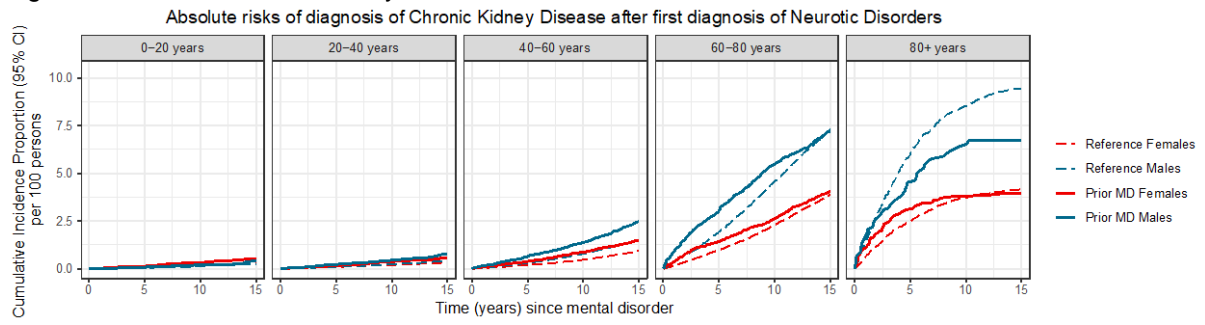

Figure S137.18 – Prostate Disorders

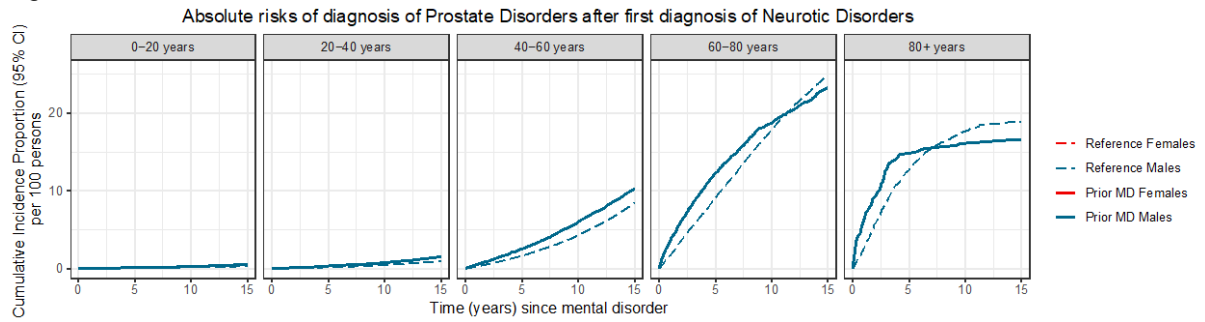

Figure S137.19 – Connective Tissue Disorders

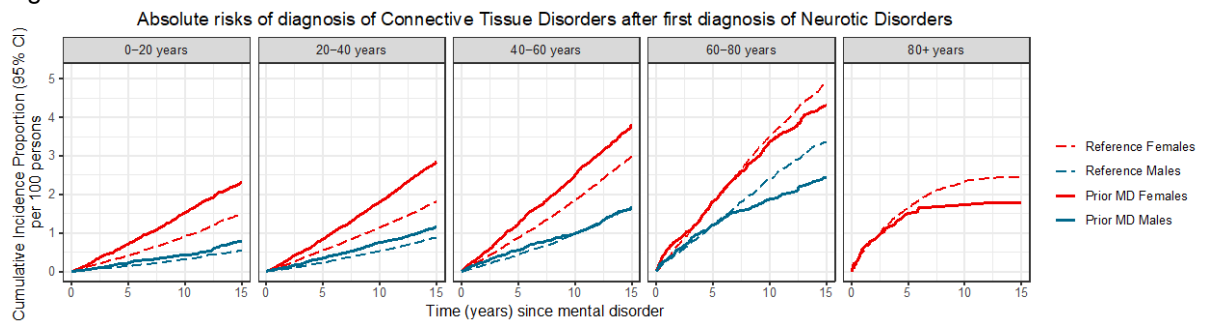

Figure S137.20 – Osteoporosis

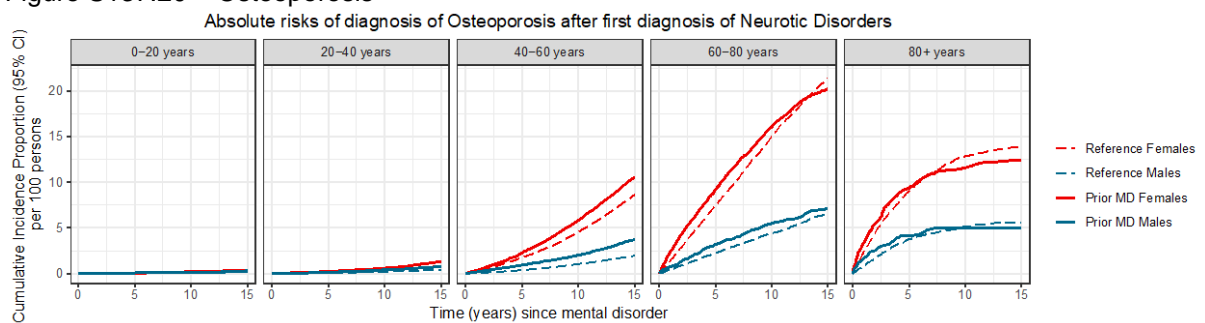

Figure S137.21 – Painful Conditions

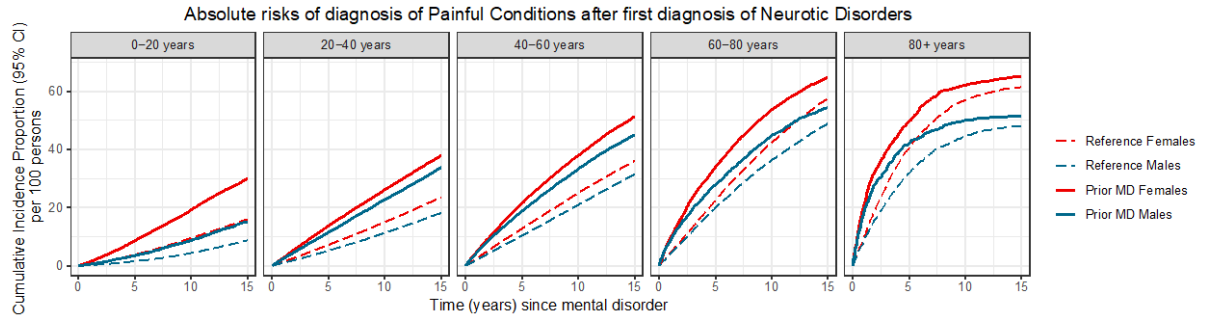

Figure S137.22 – HIV/AIDS

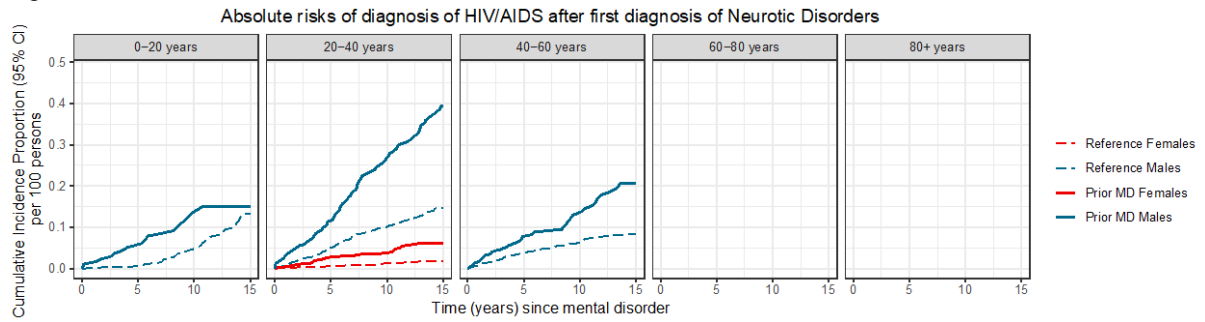

Figure S137.23 – Anemias

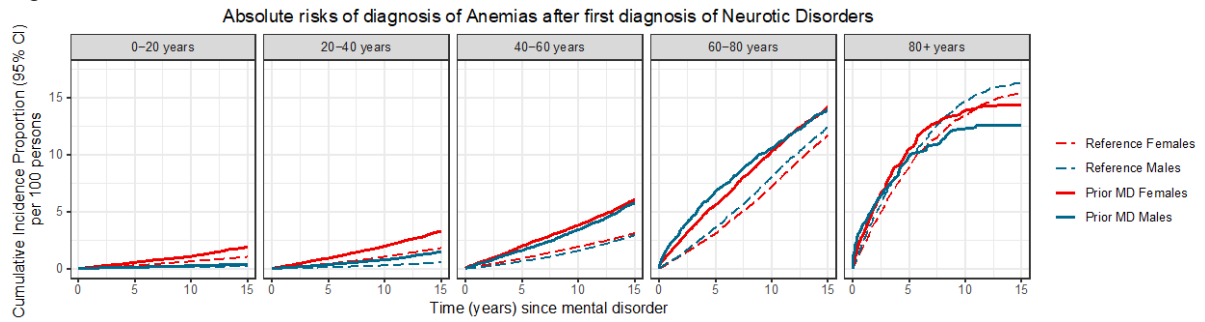

Figure S137.24 – Cancer

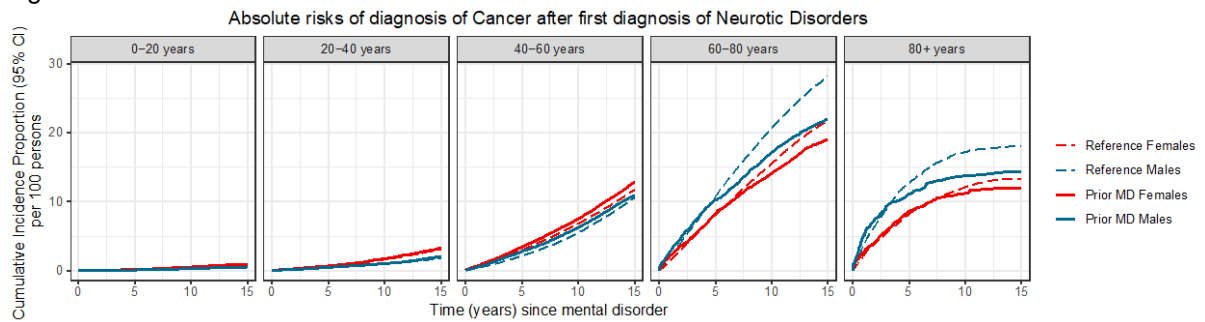

Figure S137.25 – Vision Problems

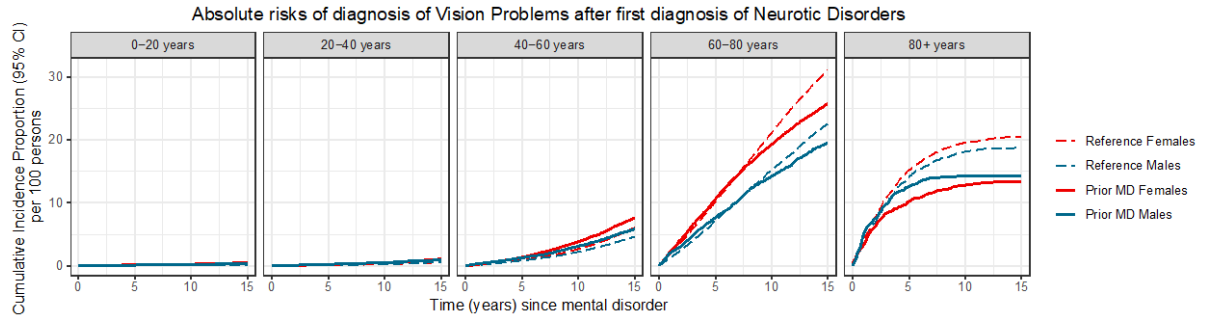

Figure S137.26 – Hearing Problems

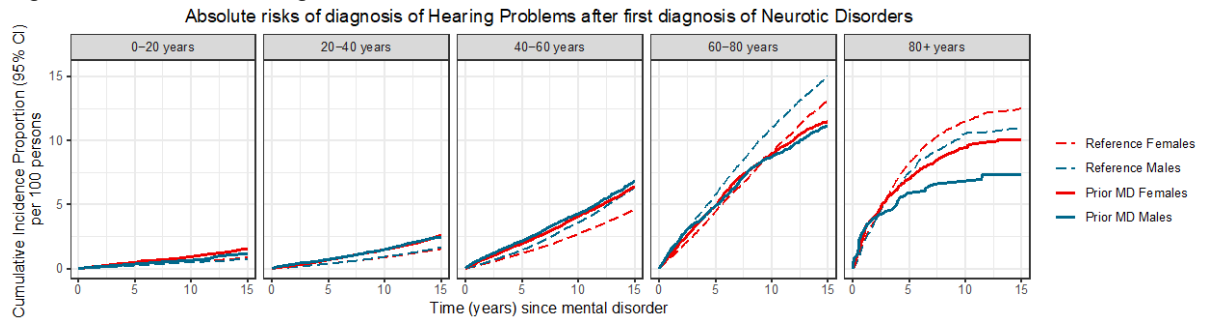

Figure S137.27 – Migraine

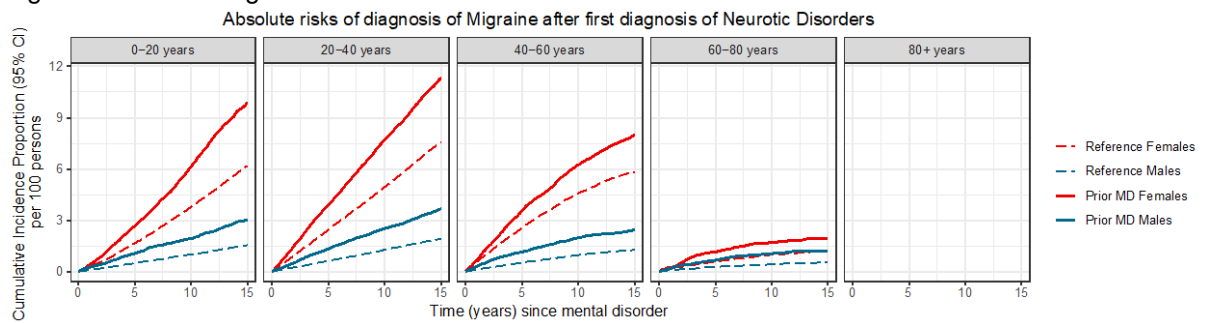

Figure S137.28 – Epilepsy

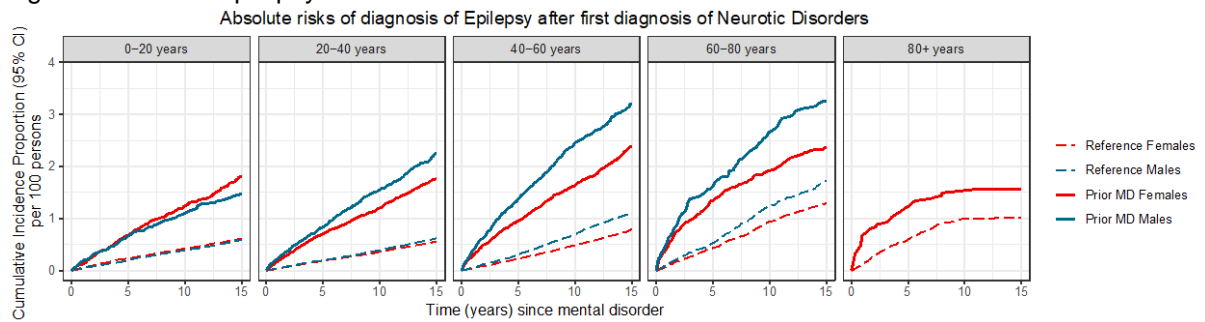

Figure S137.29 – Parkinson's Disease

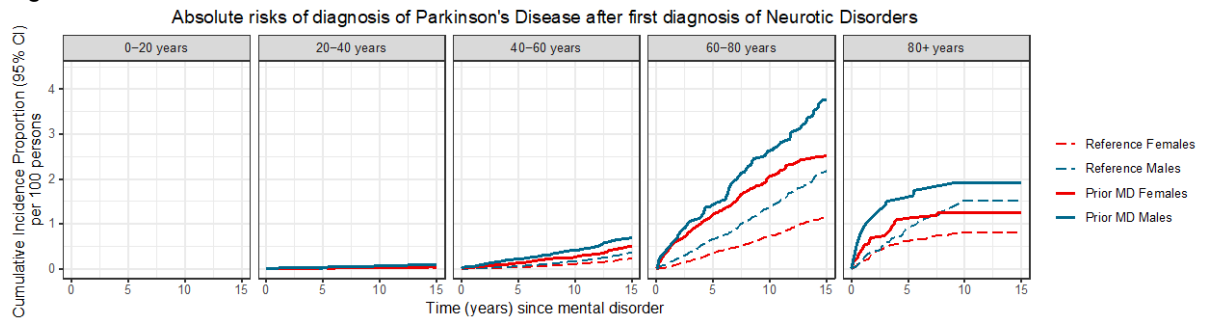

Figure S137.30 – Multiple Sclerosis

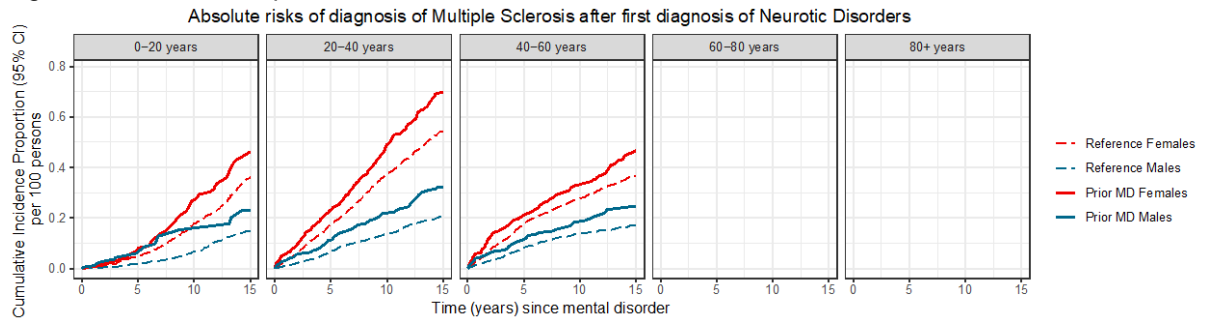

Figure S137.31 – Neuropathies

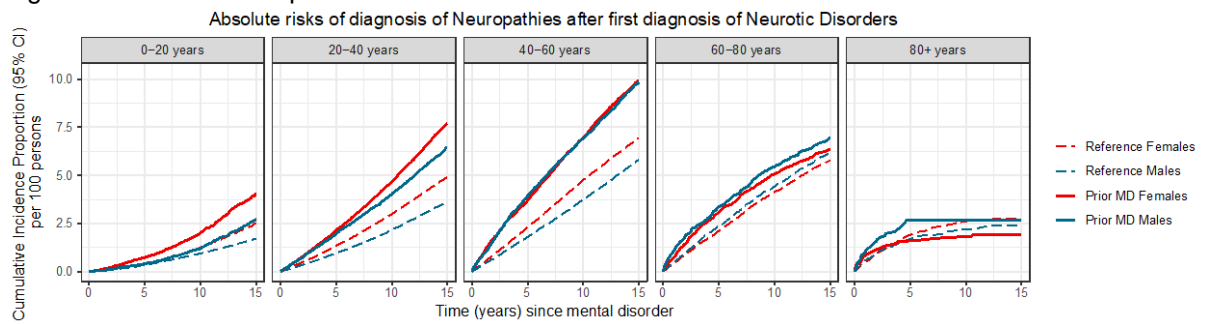



**Figures S138.1-S138.31. Sex-specific absolute risks of being diagnosed with general medical conditions after a first diagnosis of Eating Disorders**

**Figure S138.1 – Hypertension**

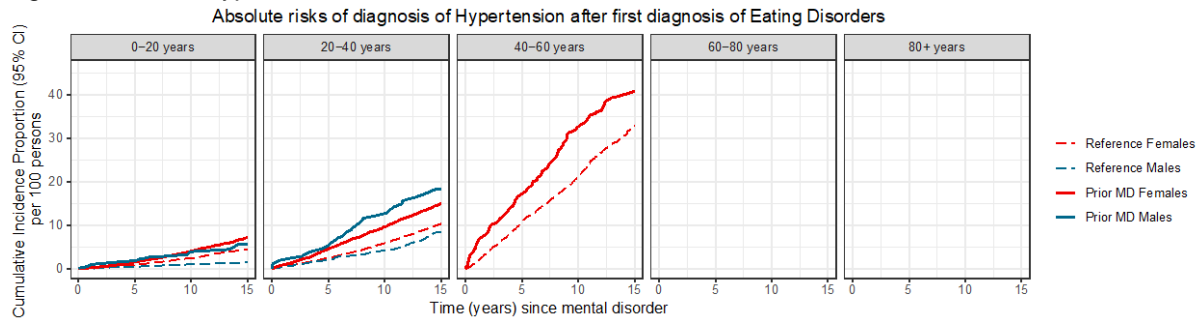

**Figure S138.2 – Dyslipidemia**

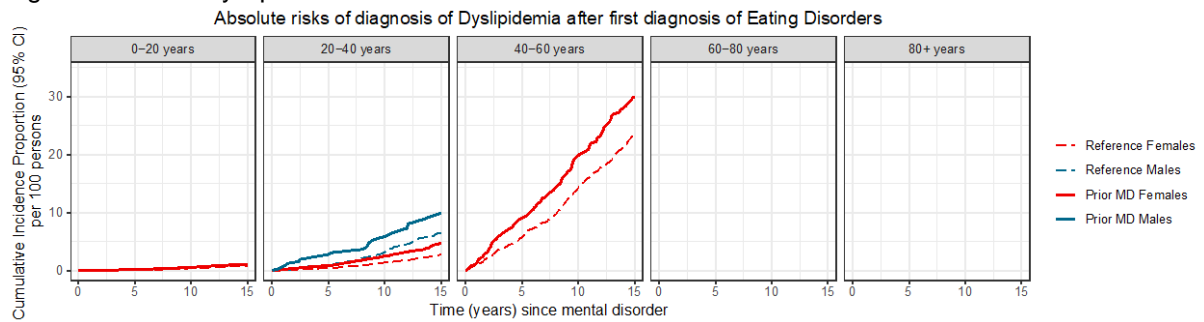

**Figure S138.3 – Ischemic Heart Disease**

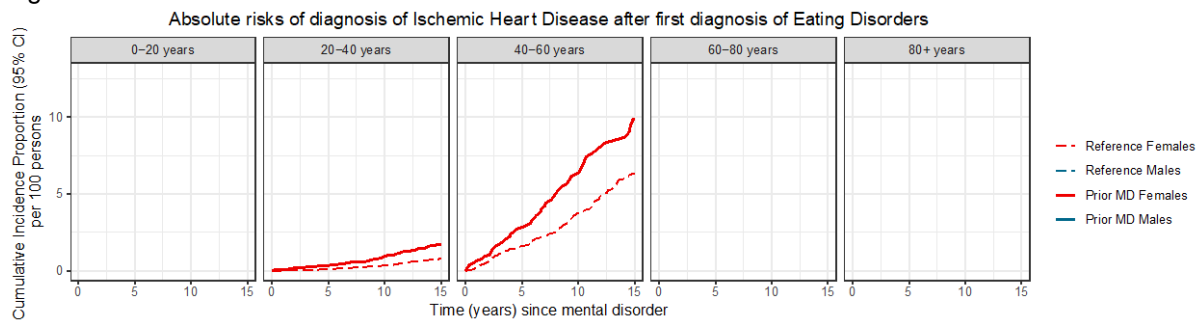

**Figure S138.4 – Atrial Fibrillation**

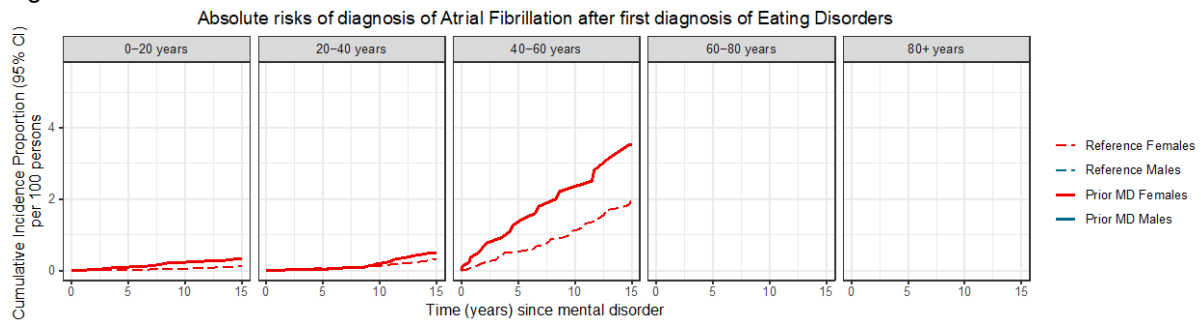

Figure S138.5 – Heart Failure

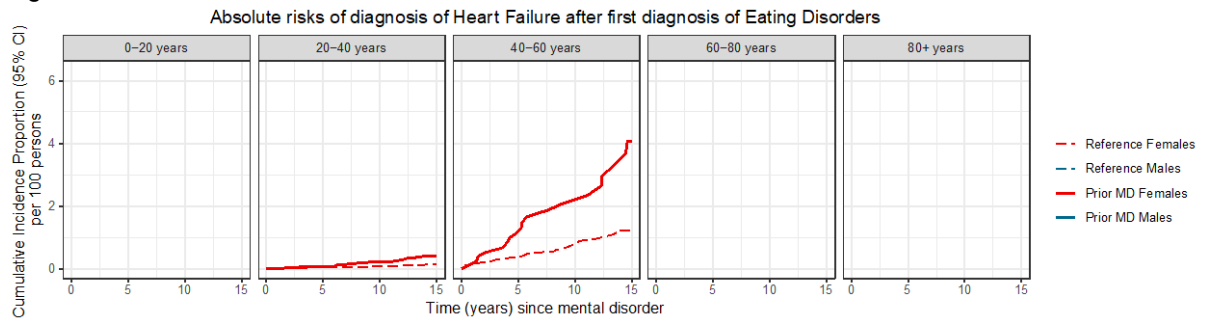

Figure S138.6 – Peripheral Artery Occlusive Disease

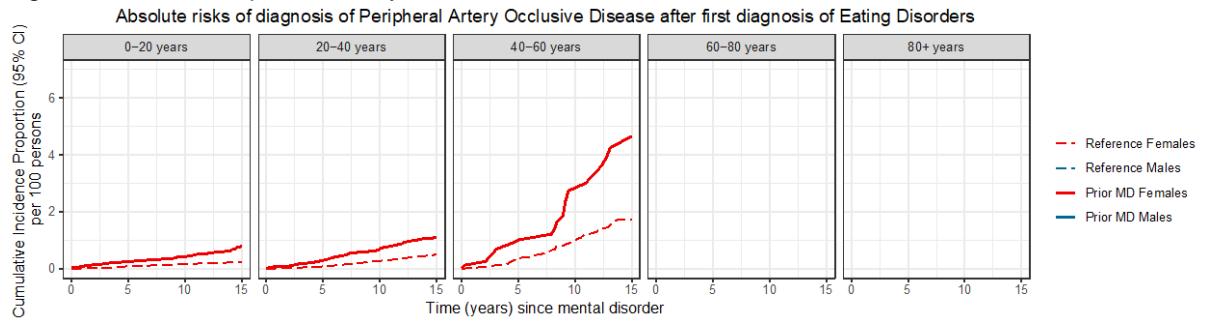

Figure S138.7 – Stroke

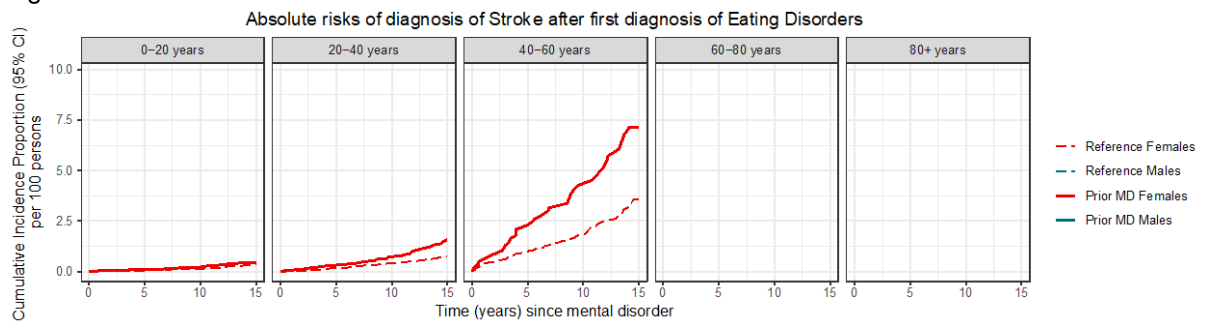

Figure S138.8 – Diabetes Mellitus

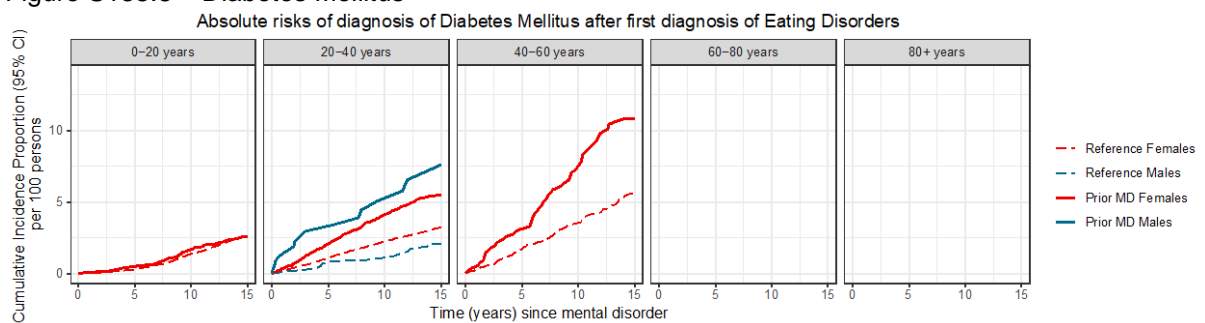

Figure S138.9 – Thyroid Disorders

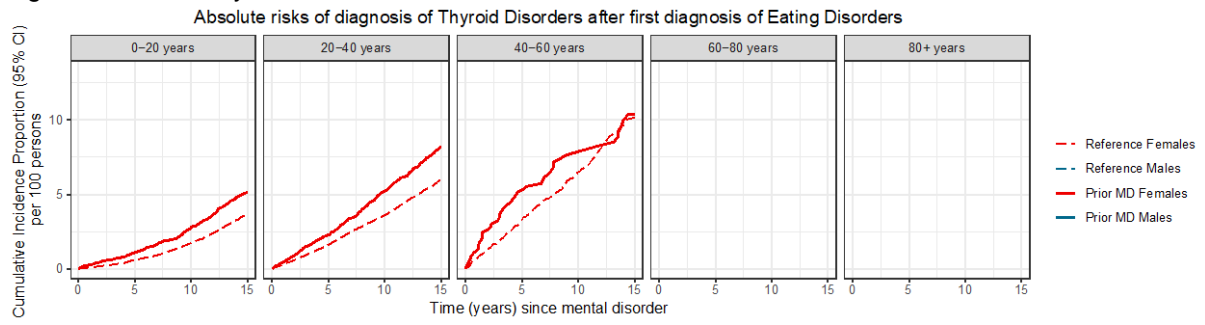

Figure S138.10 – Gout

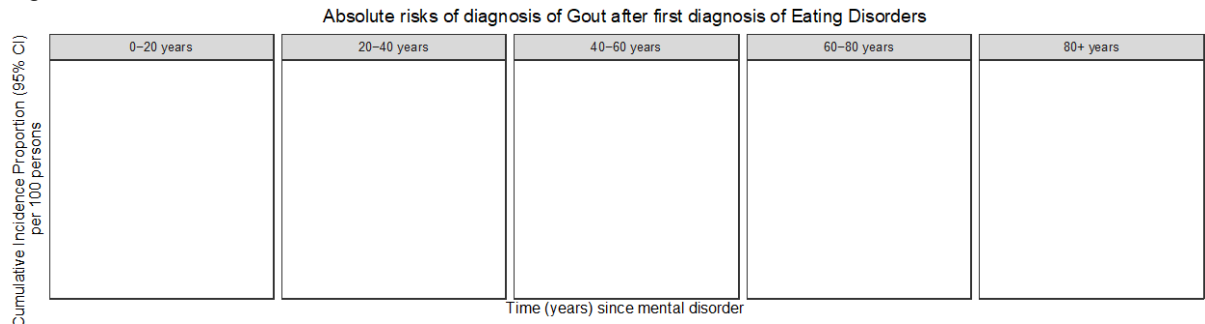

Figure S138.11 – Chronic Pulmonary Disease

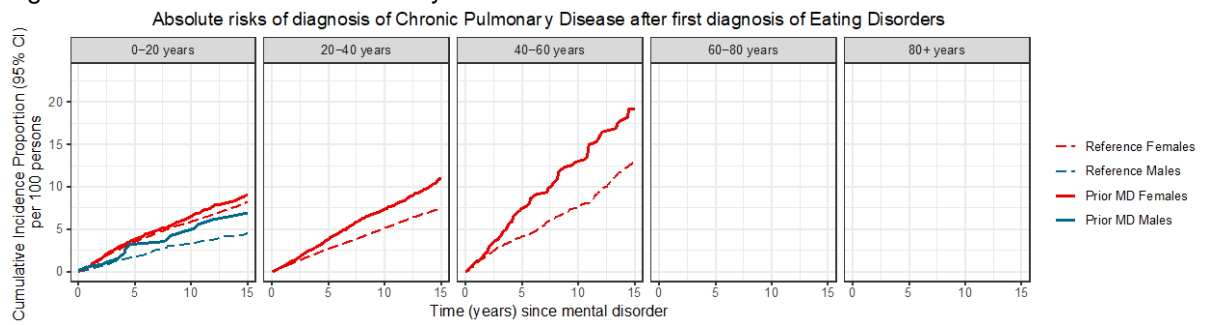

Figure S138.12 – Allergy

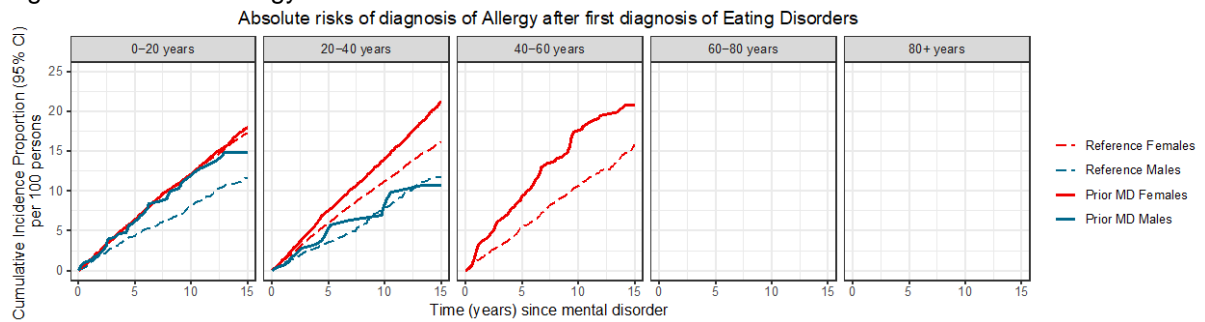

Figure S138.13 – Ulcer/Chronic Gastritis

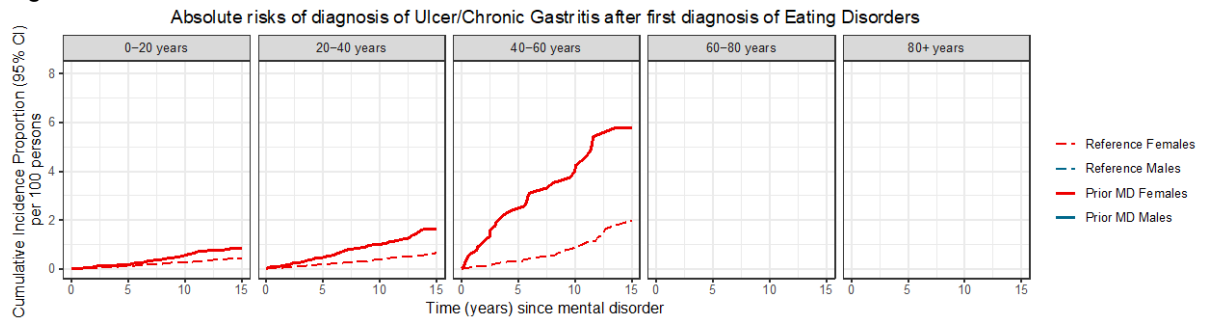

Figure S138.14 – Chronic Liver Disease

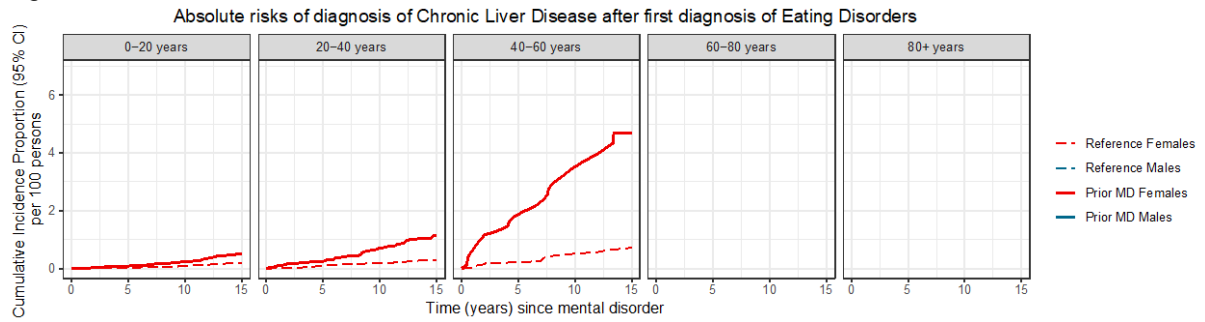

Figure S138.15 – Inflammatory Bowel Disease

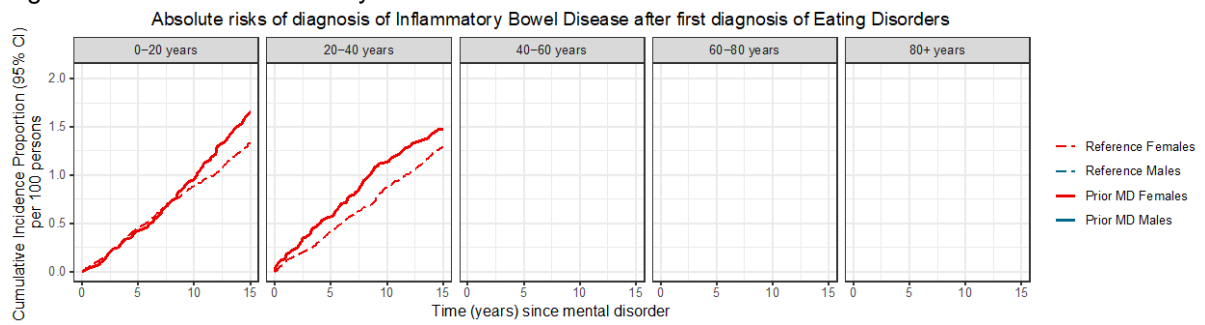

Figure S138.16 – Diverticular Disease of the Intestine

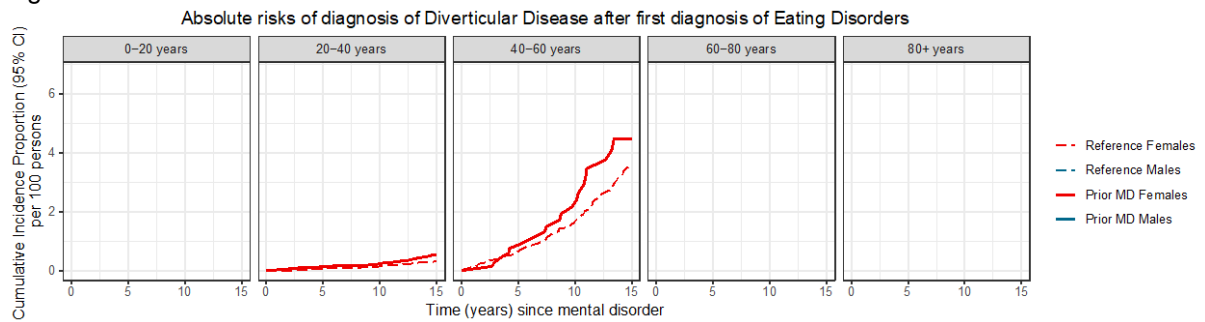

Figure S138.17 – Chronic Kidney Disease

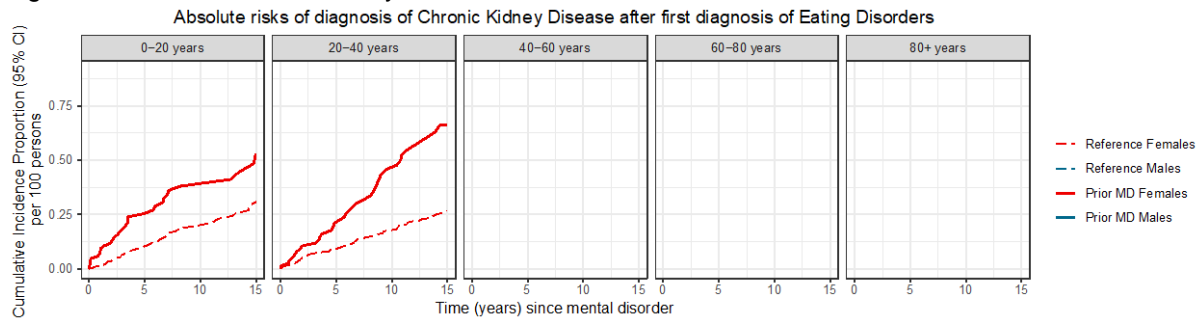

Figure S138.18 – Prostate Disorders

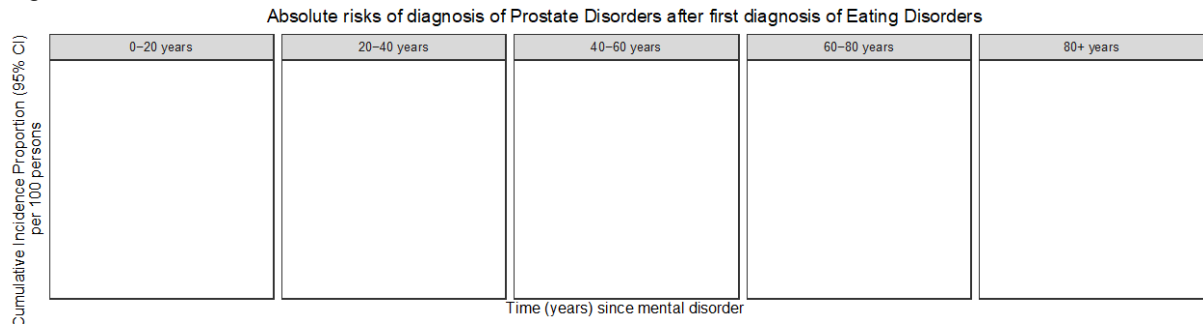

Figure S138.19 – Connective Tissue Disorders

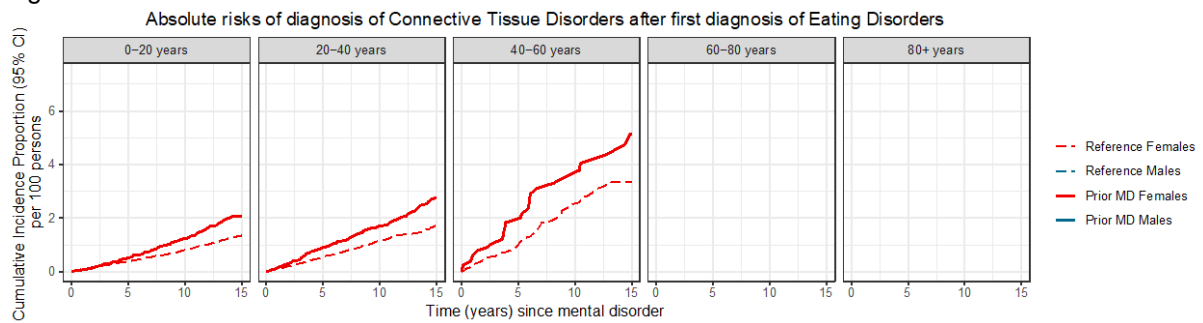

Figure S138.20 – Osteoporosis

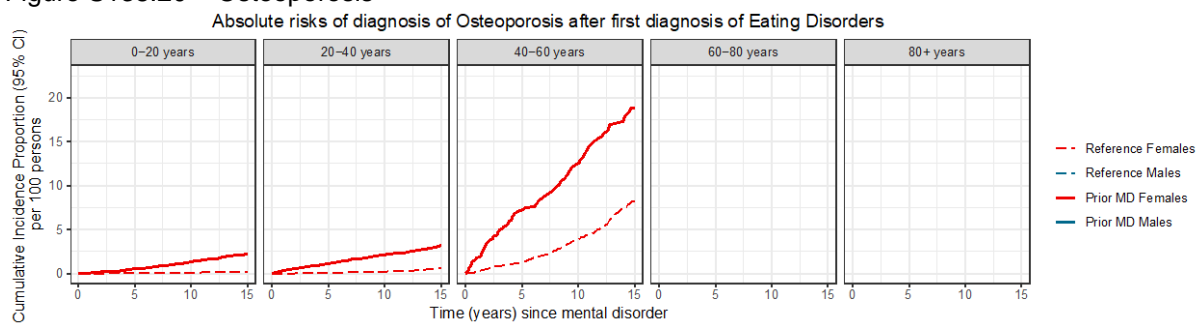

Figure S138.21 – Painful Conditions

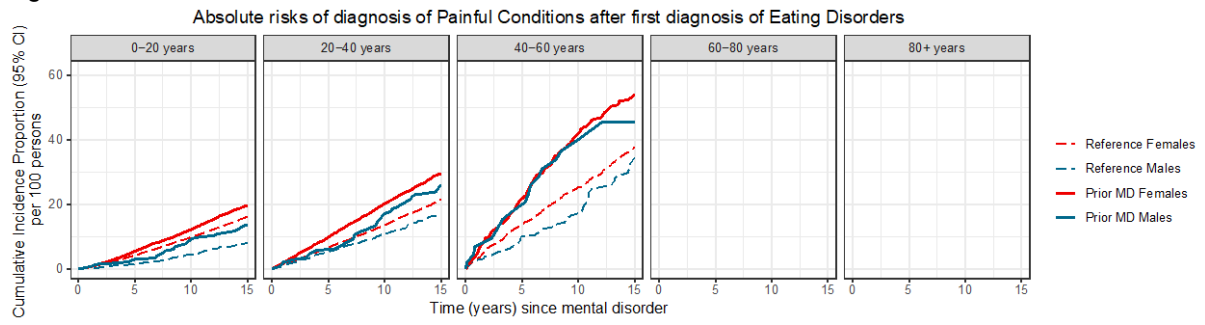

Figure S138.22 – HIV/AIDS

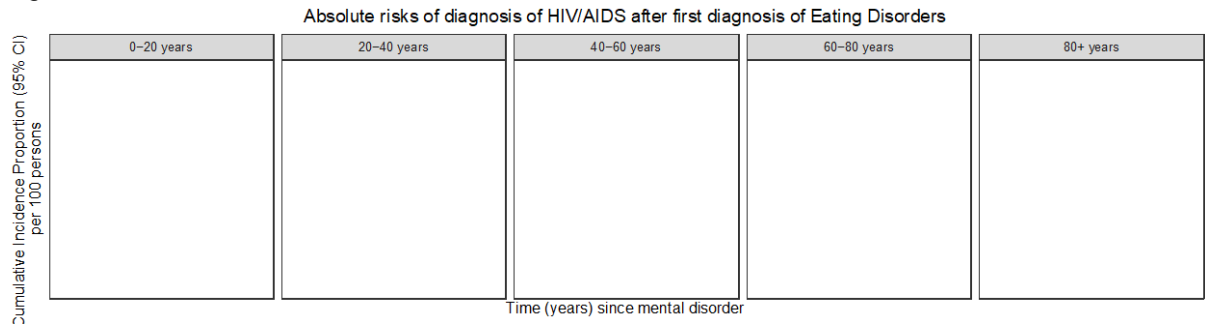

Figure S138.23 – Anemias

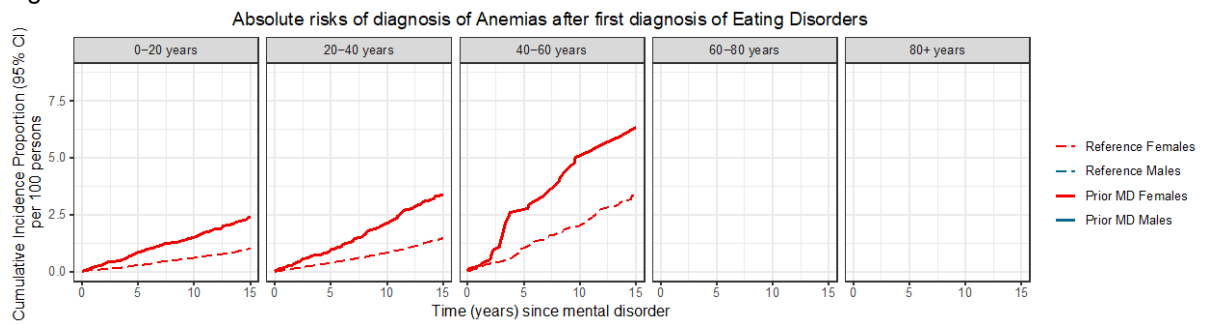

Figure S138.24 – Cancer

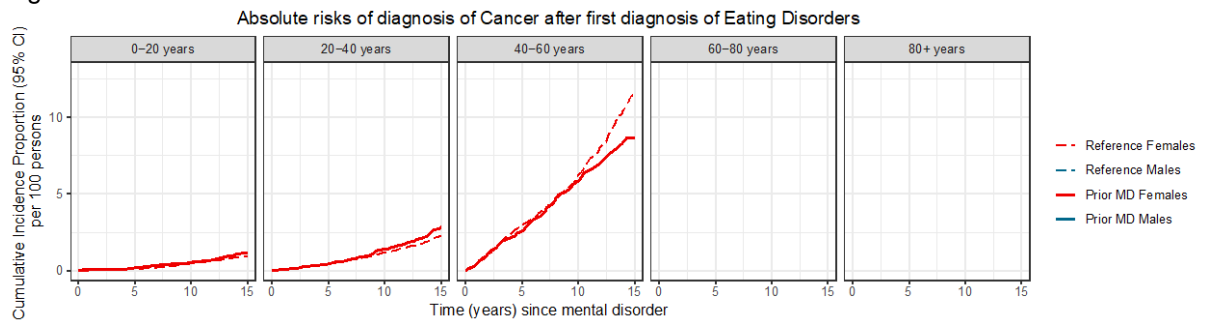

Figure S138.25 – Vision Problems

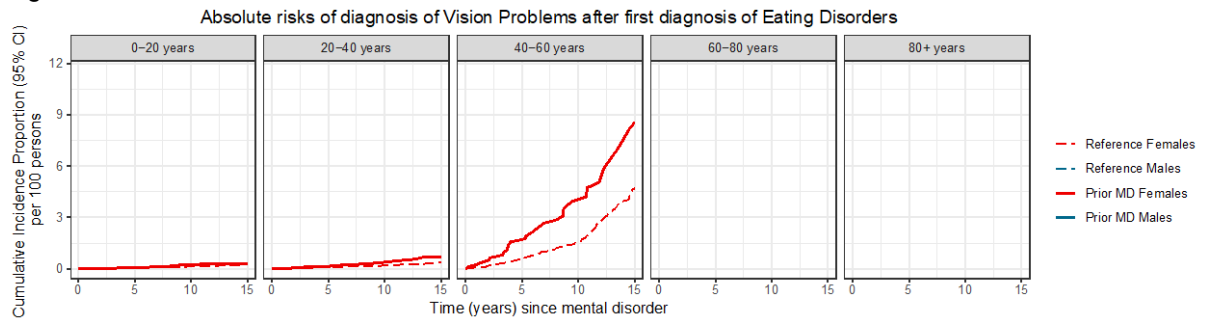

Figure S138.26 – Hearing Problems

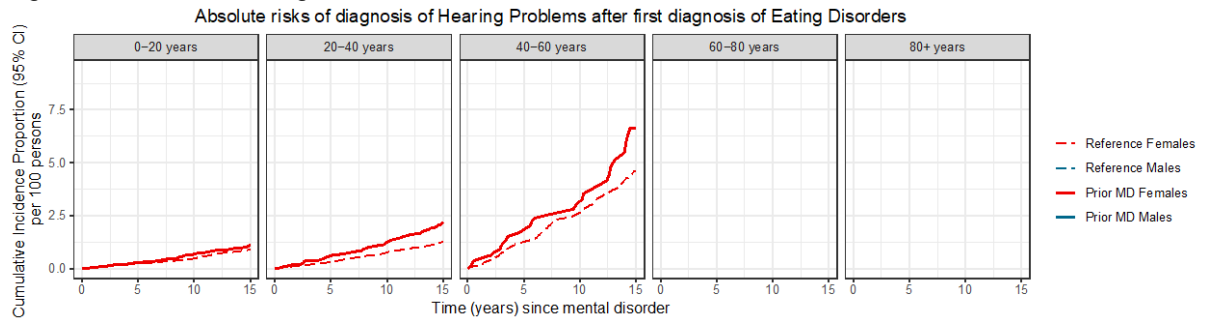

Figure S138.27 – Migraine

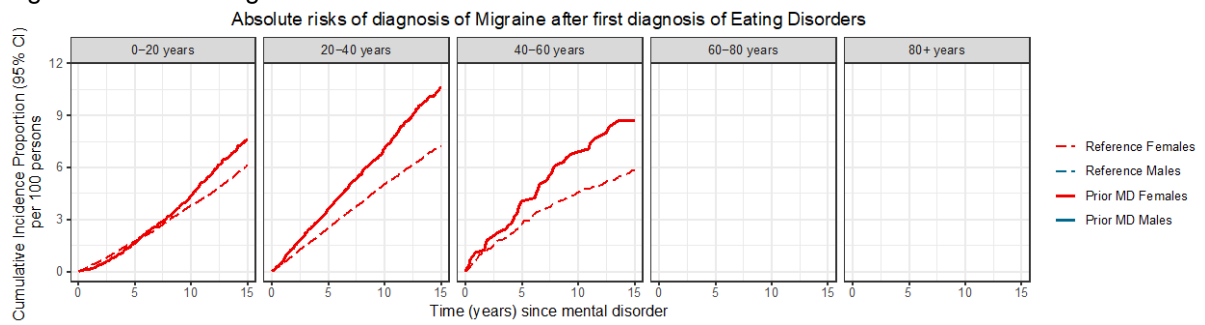

Figure S138.28 – Epilepsy

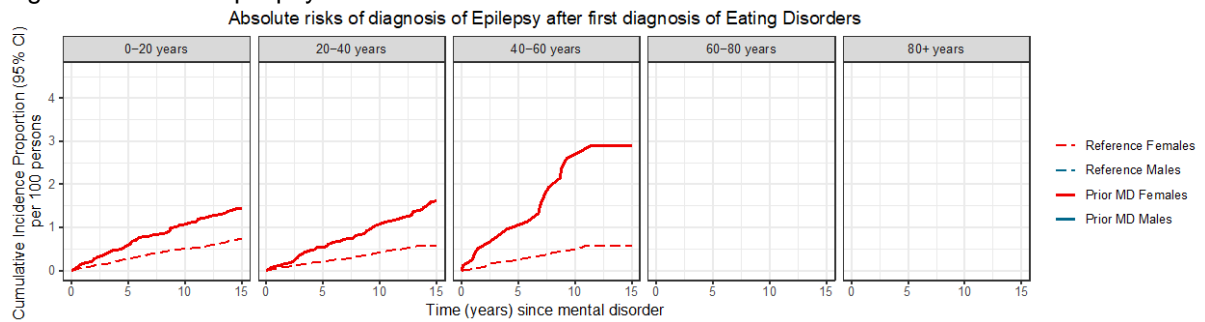

Figure S138.29 – Parkinson's Disease



Figure S138.30 – Multiple Sclerosis

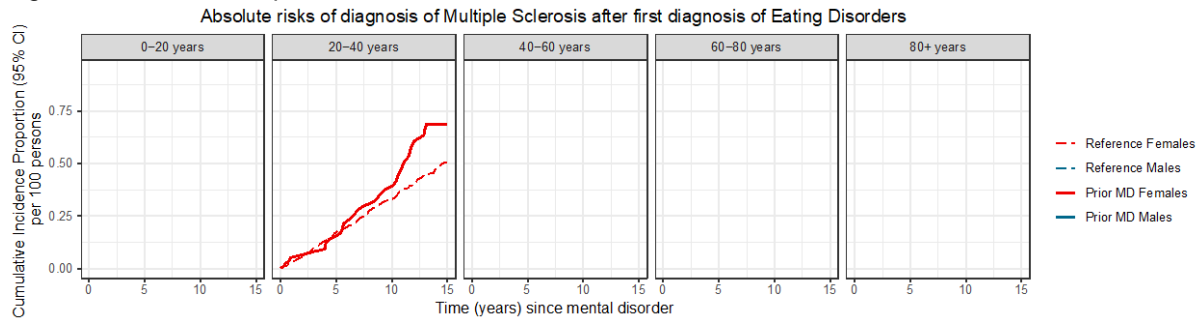

Figure S138.31 – Neuropathies

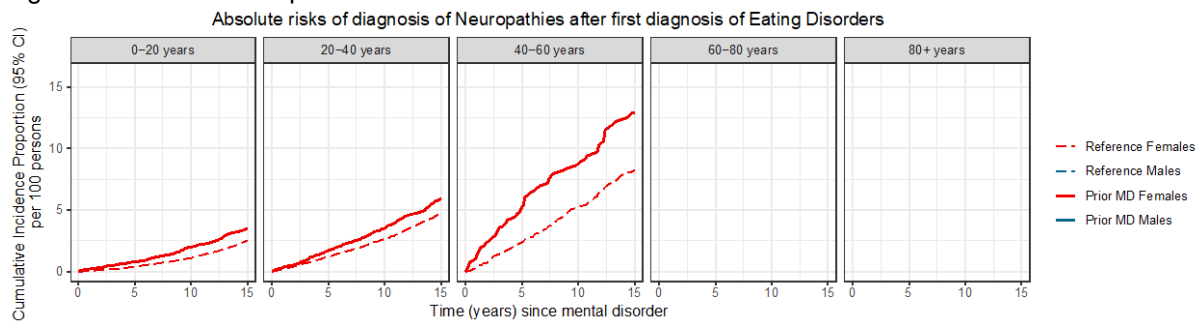



**Figures S139.1-S139.31. Sex-specific absolute risks of being diagnosed with general medical conditions after a first diagnosis of Personality Disorders**

**Figure S139.1 – Hypertension**

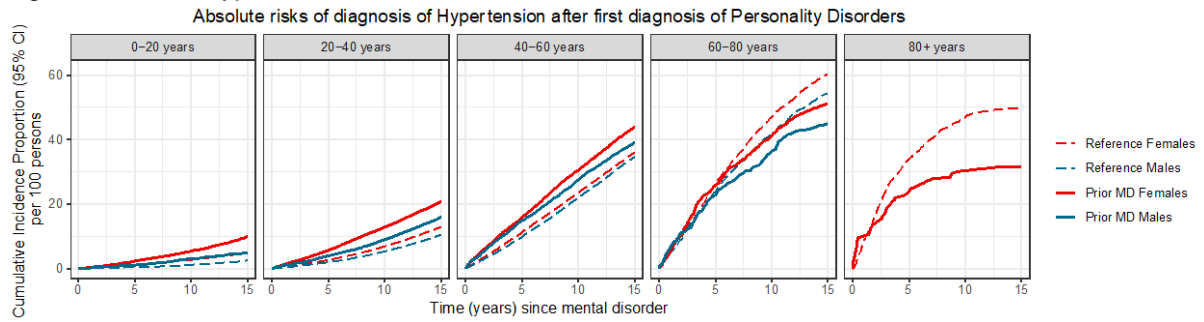

**Figure S139.2 – Dyslipidemia**

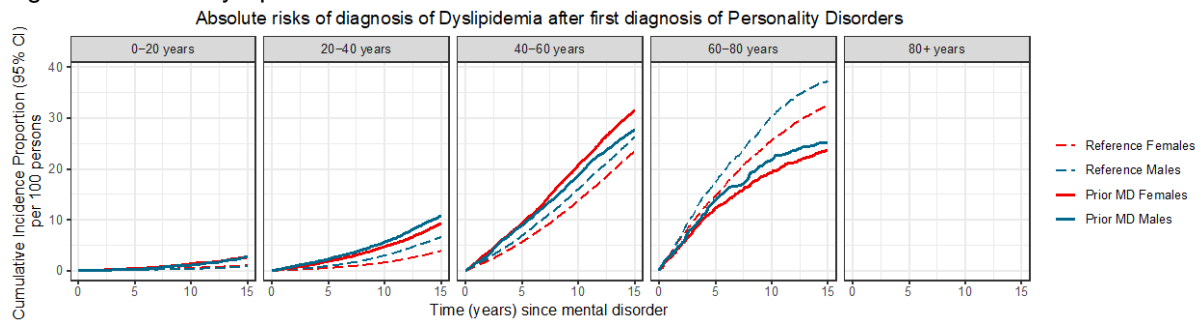

**Figure S139.3 – Ischemic Heart Disease**

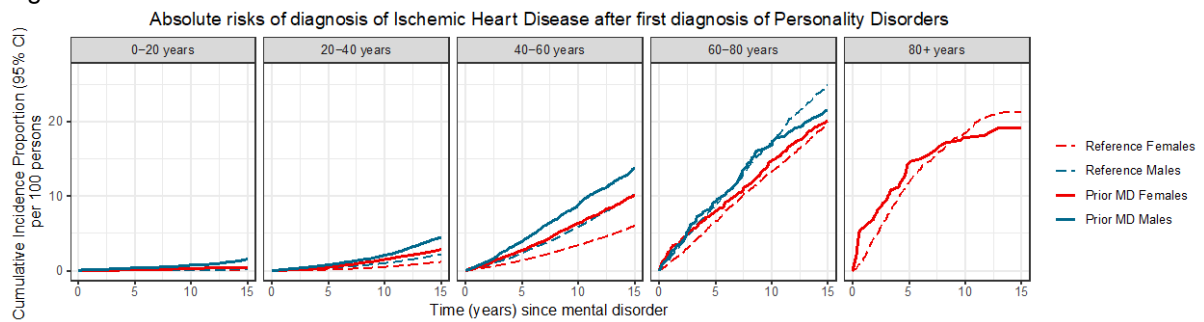

**Figure S139.4 – Atrial Fibrillation**

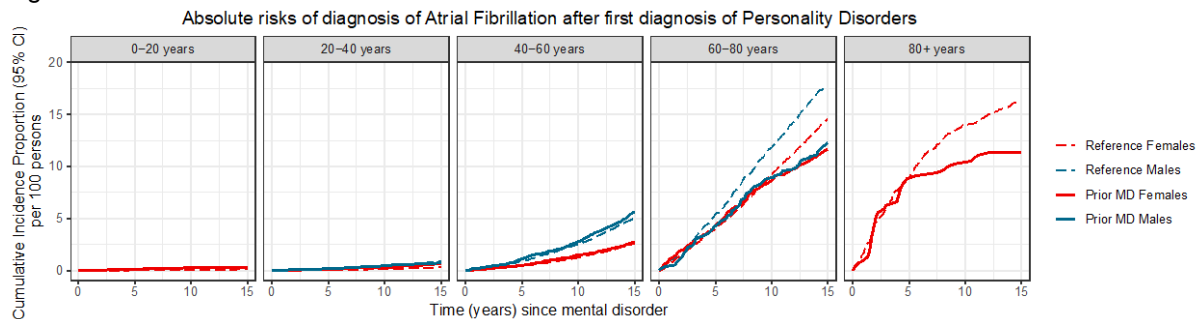

Figure S139.5 – Heart Failure

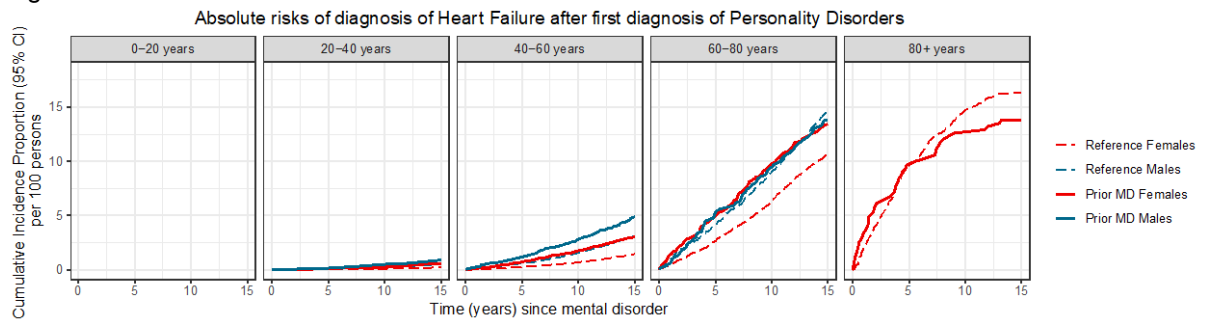

Figure S139.6 – Peripheral Artery Occlusive Disease

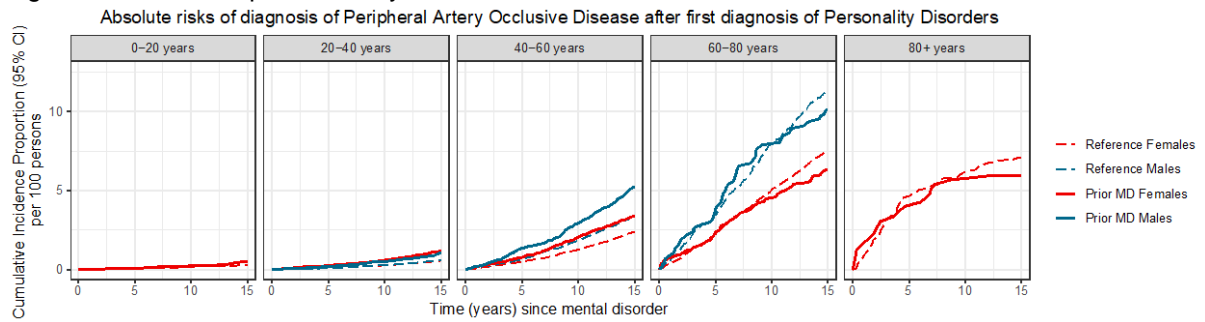

Figure S139.7 – Stroke

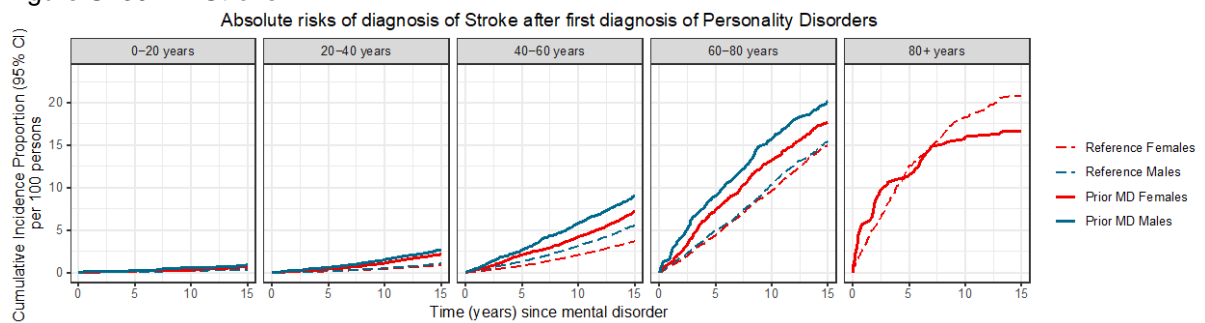

Figure S139.8 – Diabetes Mellitus

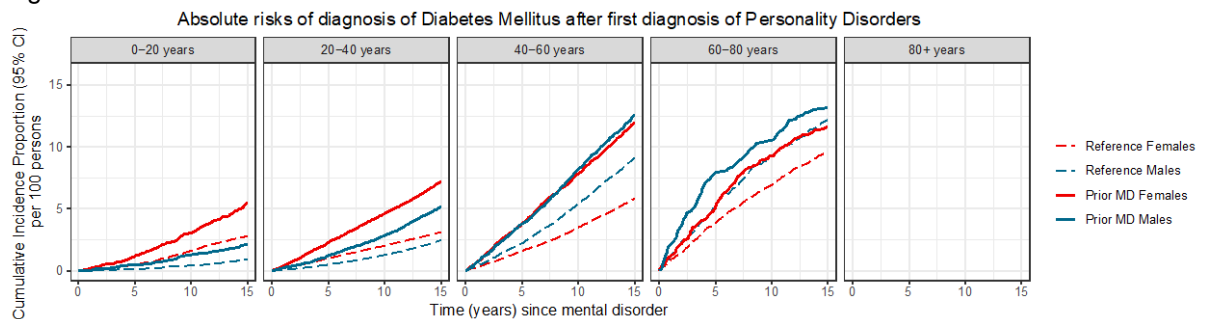

Figure S139.9 – Thyroid Disorders

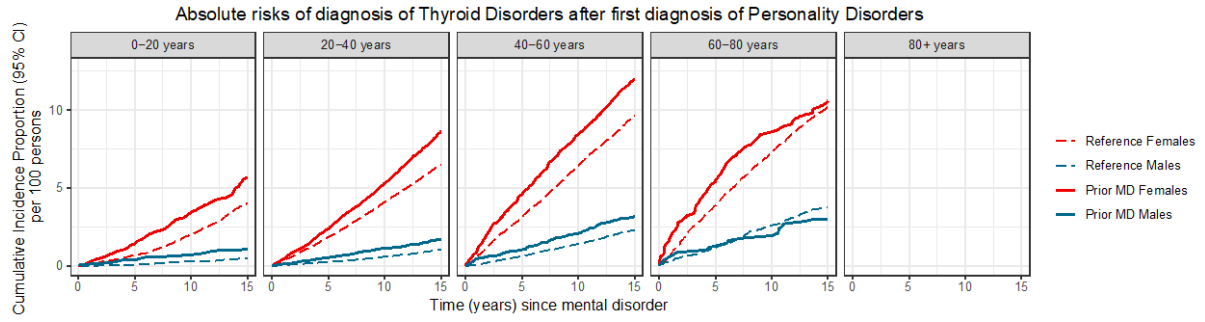

Figure S139.10 – Gout

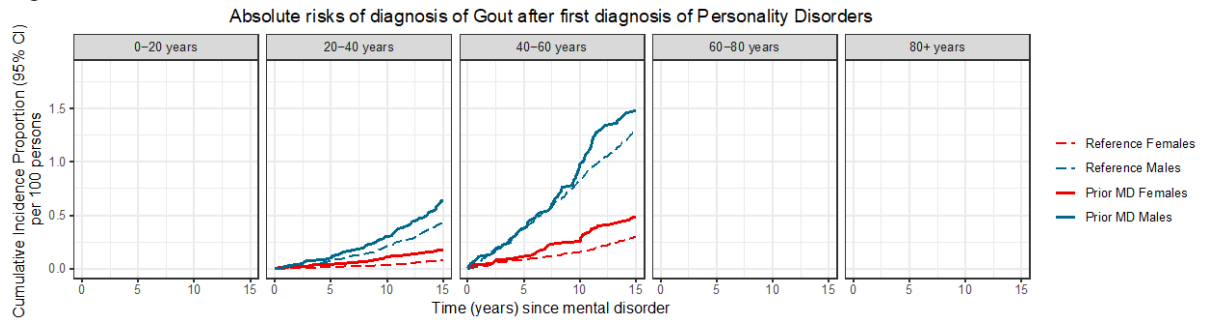

Figure S139.11 – Chronic Pulmonary Disease

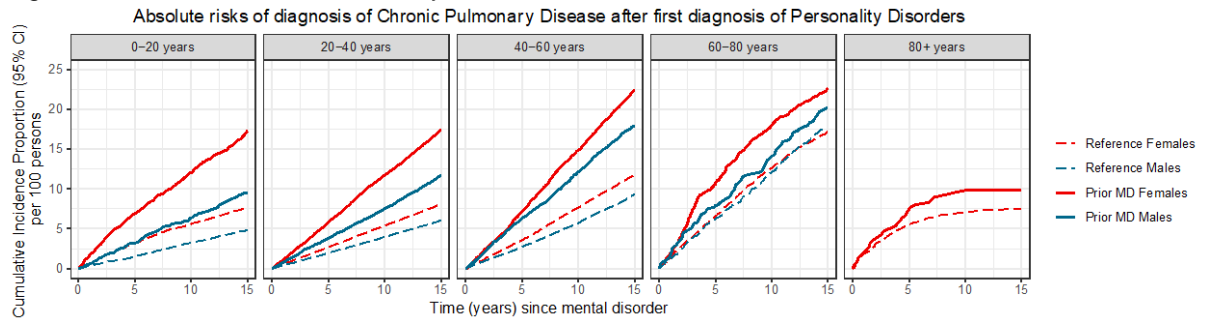

Figure S139.12 – Allergy

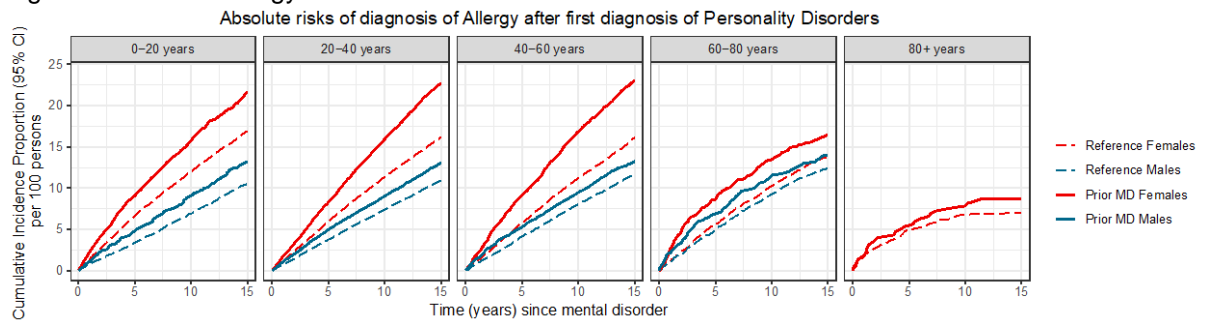

Figure S139.13 – Ulcer/Chronic Gastritis

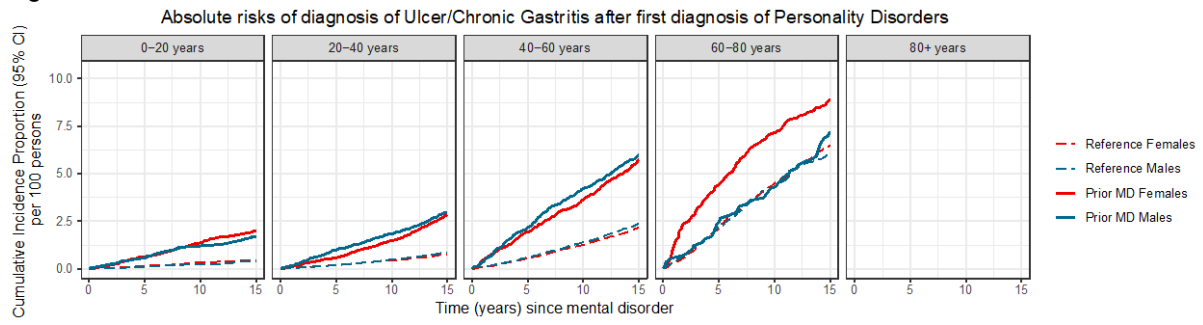

Figure S139.14 – Chronic Liver Disease

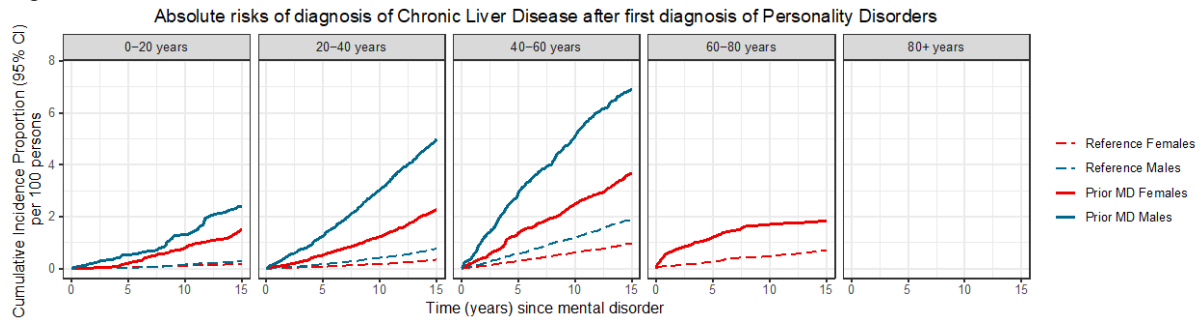

Figure S139.15 – Inflammatory Bowel Disease

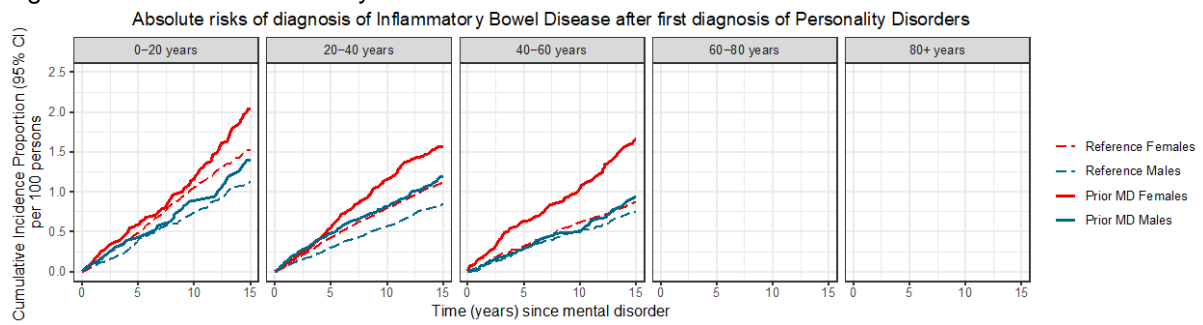

Figure S139.16 – Diverticular Disease of the Intestine

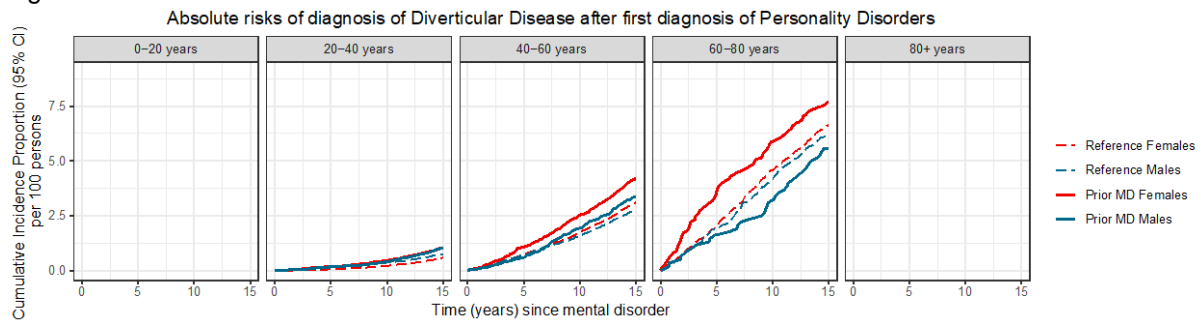

Figure S139.17 – Chronic Kidney Disease

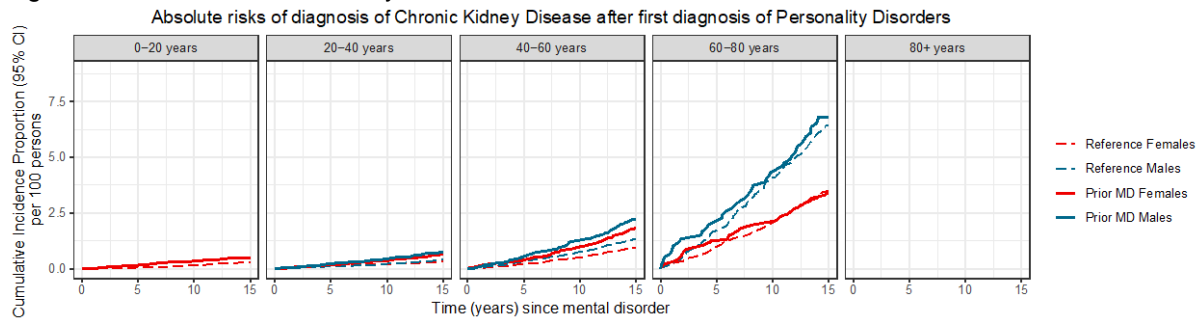

Figure S139.18 – Prostate Disorders

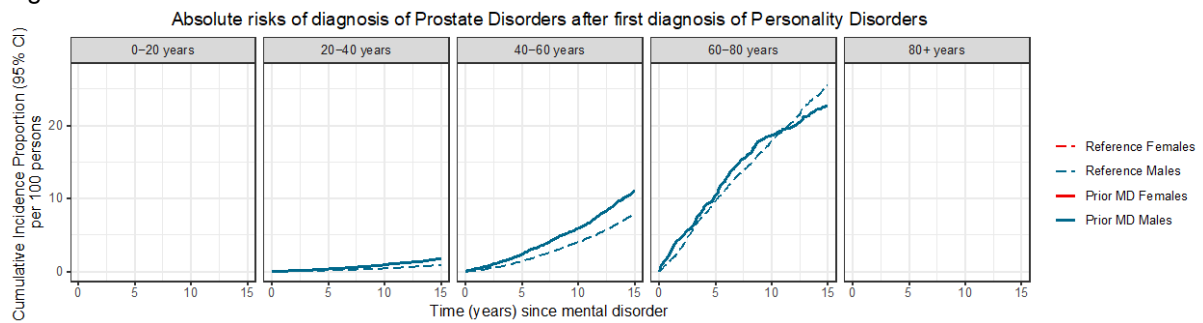

Figure S139.19 – Connective Tissue Disorders

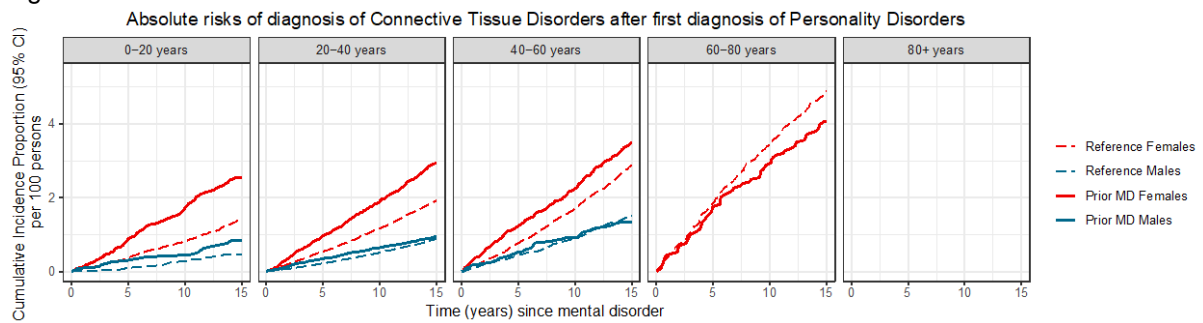

Figure S139.20 – Osteoporosis

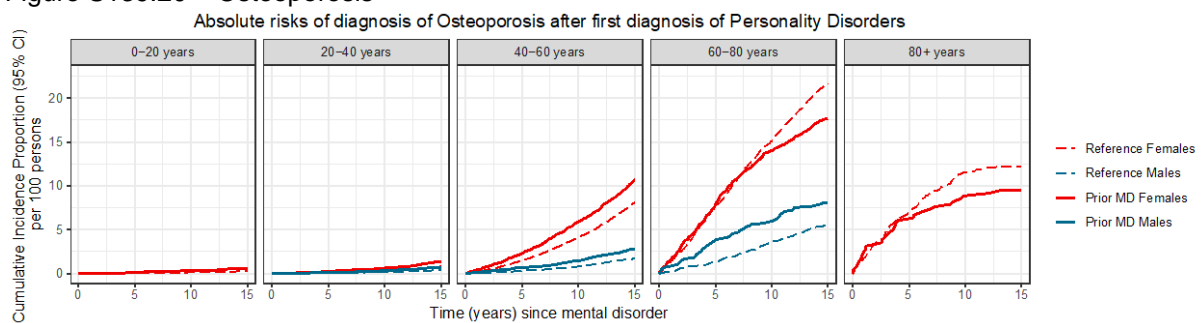

Figure S139.21 – Painful Conditions

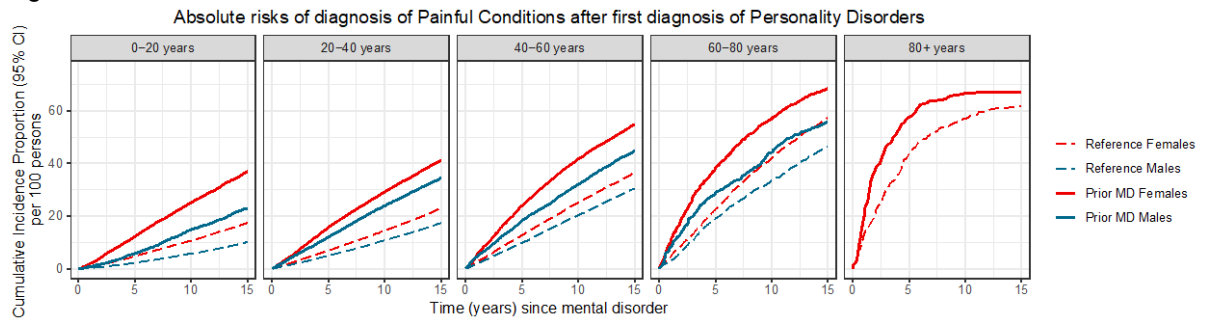

Figure S139.22 – HIV/AIDS

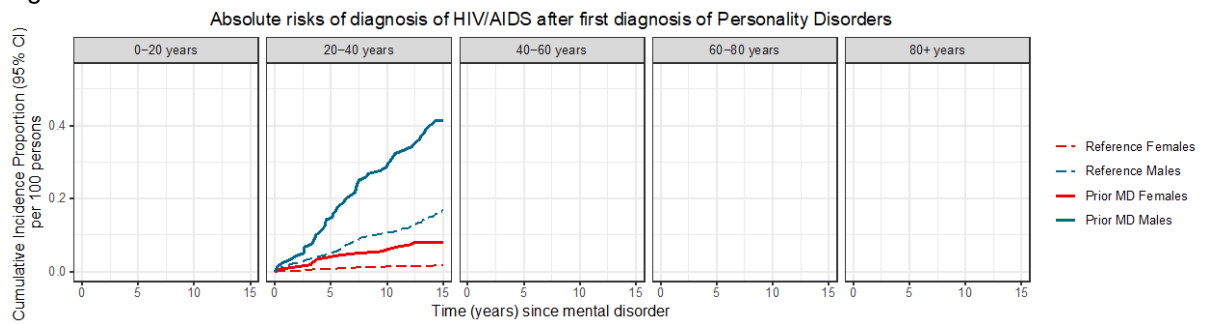

Figure S139.23 – Anemias

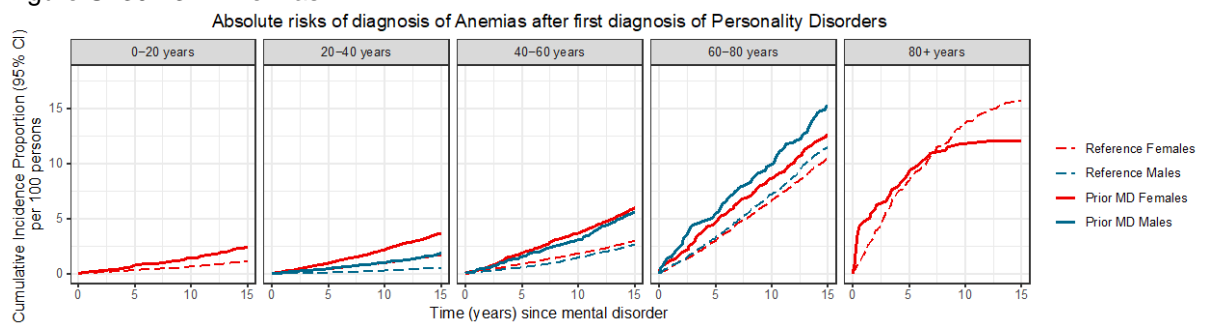

Figure S139.24 – Cancer

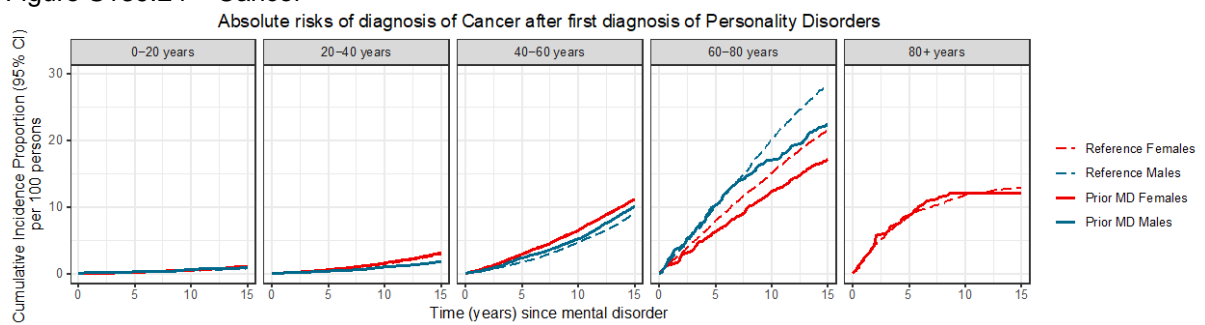

Figure S139.25 – Vision Problems

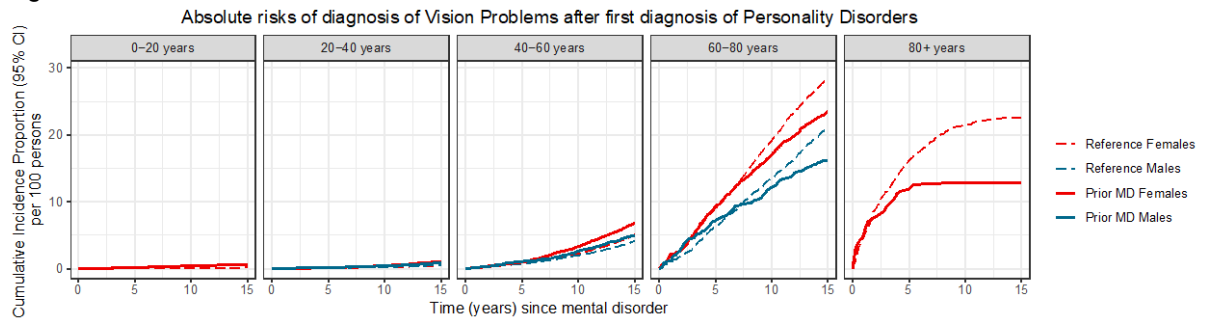

Figure S139.26 – Hearing Problems

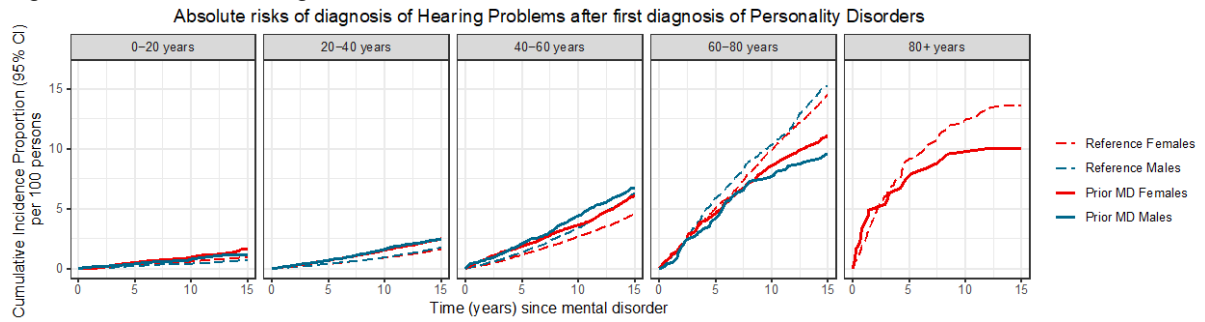

Figure S139.27 – Migraine

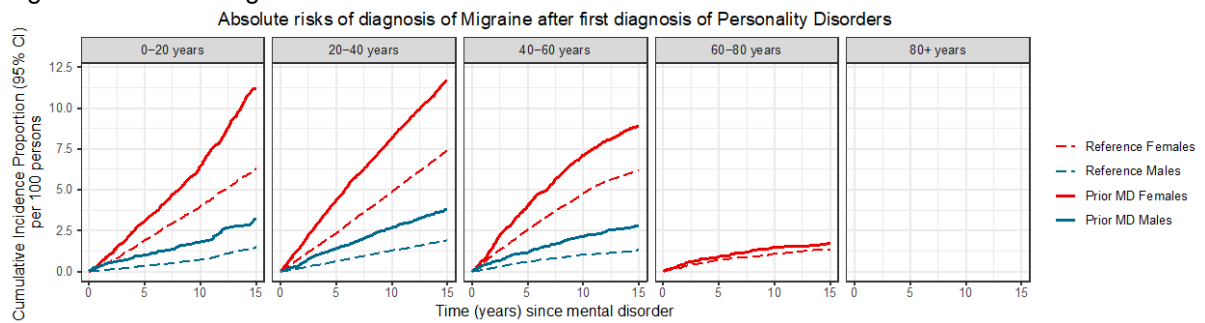

Figure S139.28 – Epilepsy

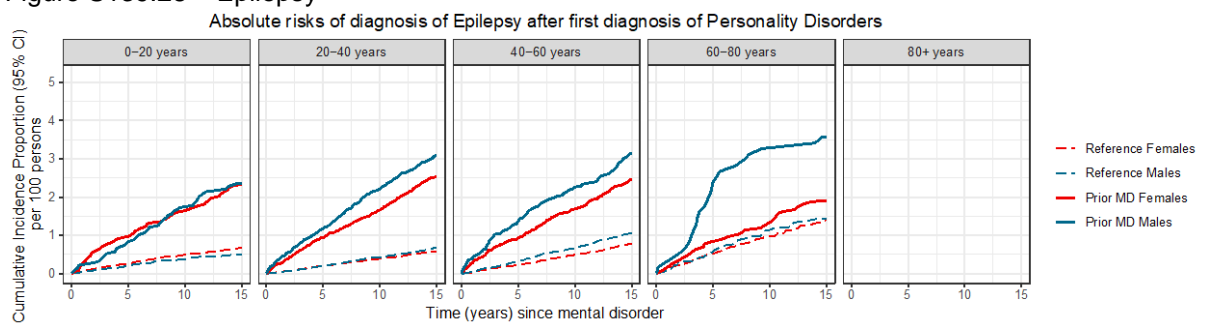

Figure S139.29 – Parkinson's Disease

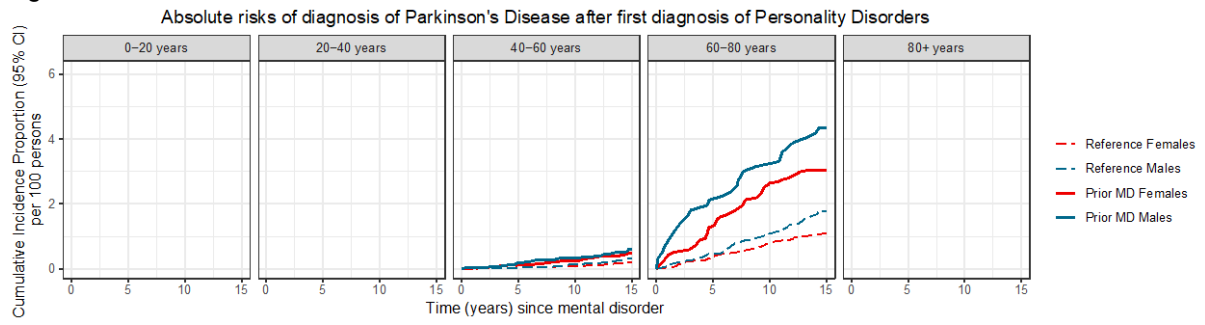

Figure S139.30 – Multiple Sclerosis

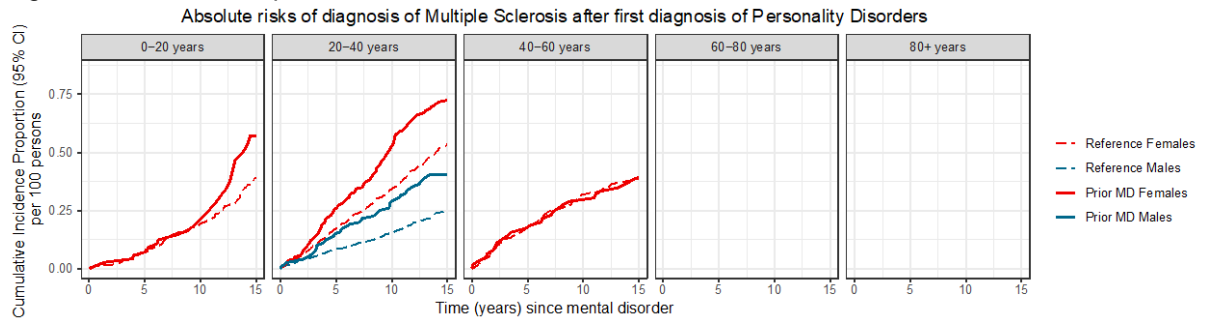

Figure S139.31 – Neuropathies

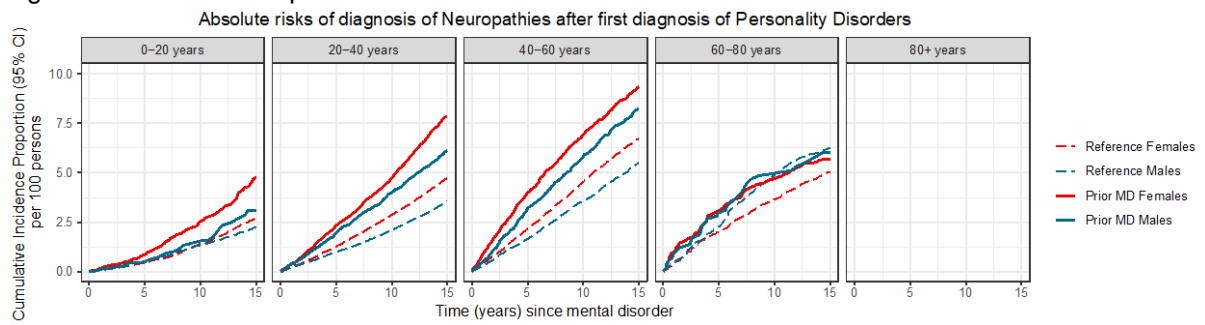



**Figures S140.1-S140.31. Sex-specific absolute risks of being diagnosed with general medical conditions after a first diagnosis of Intellectual Disabilities**

**Figure S140.1 - Hypertension**

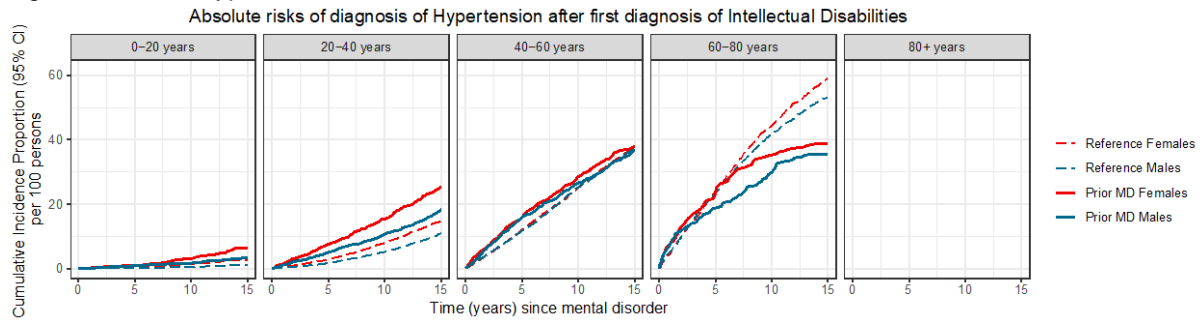

**Figure S140.2 – Dyslipidemia**

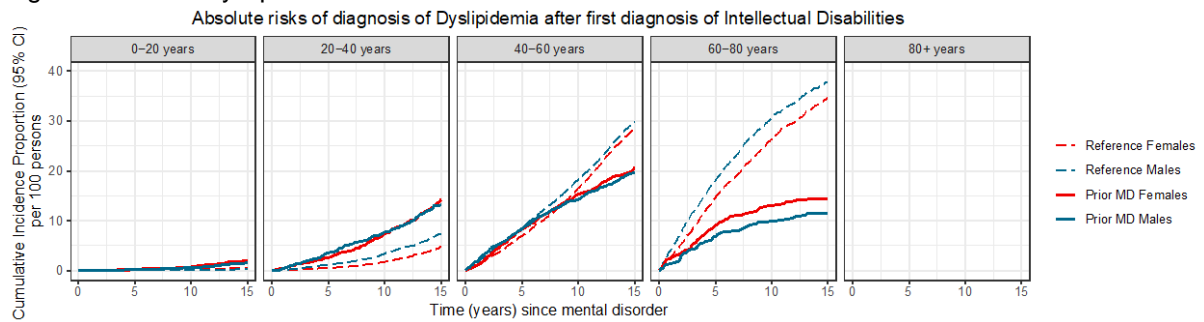

**Figure S140.3 – Ischemic Heart Disease**

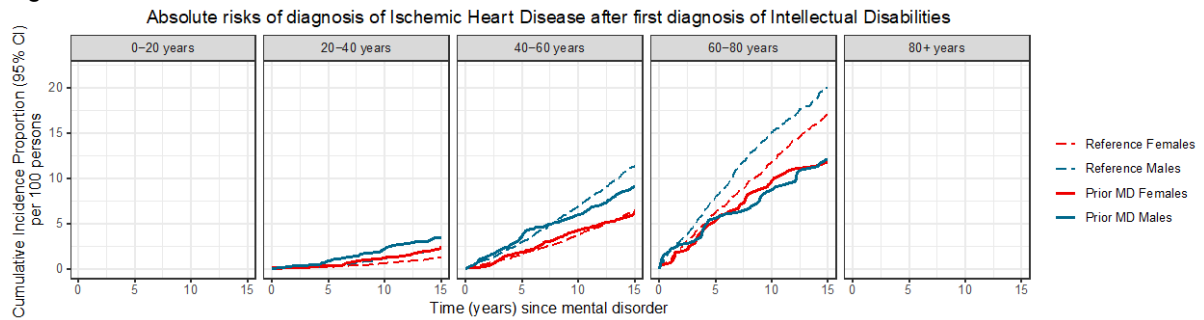

**Figure S140.4 – Atrial Fibrillation**

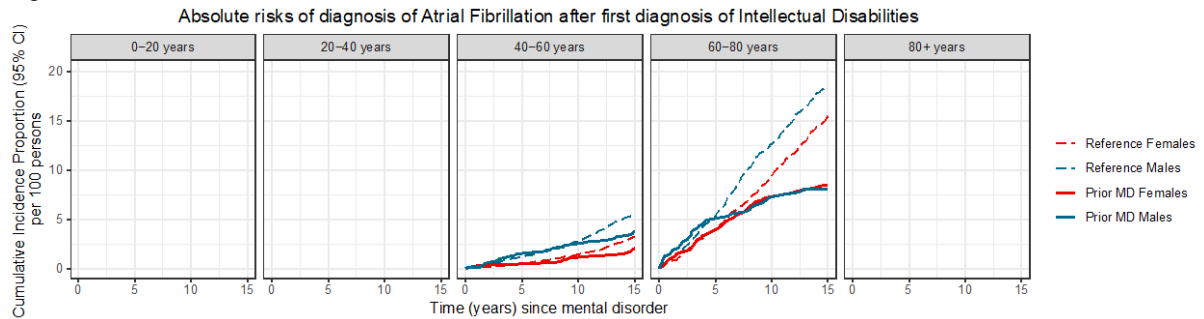

Figure S140.5 – Heart Failure

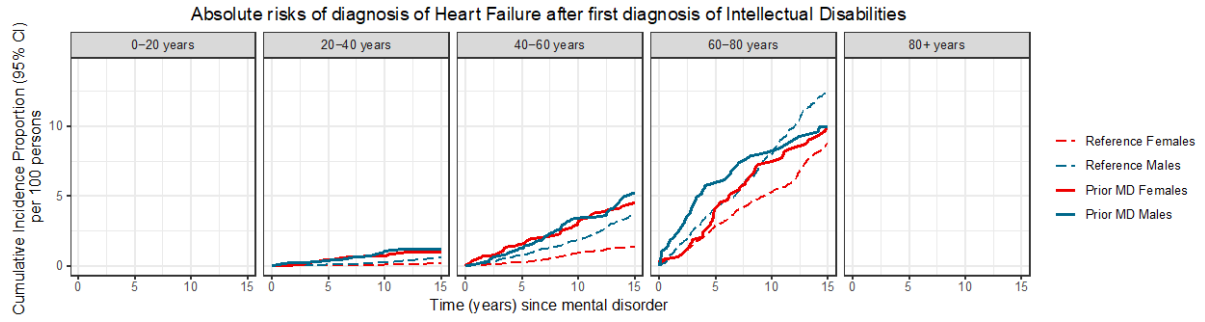

Figure S140.6 – Peripheral Artery Occlusive Disease

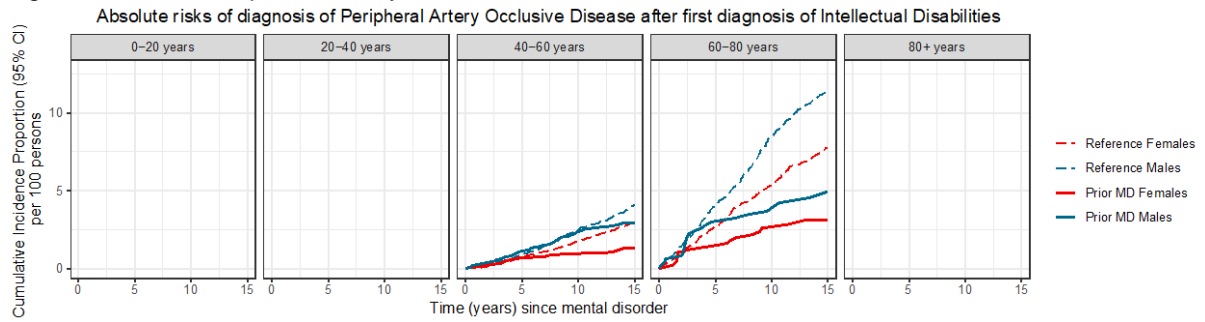

Figure S140.7 – Stroke

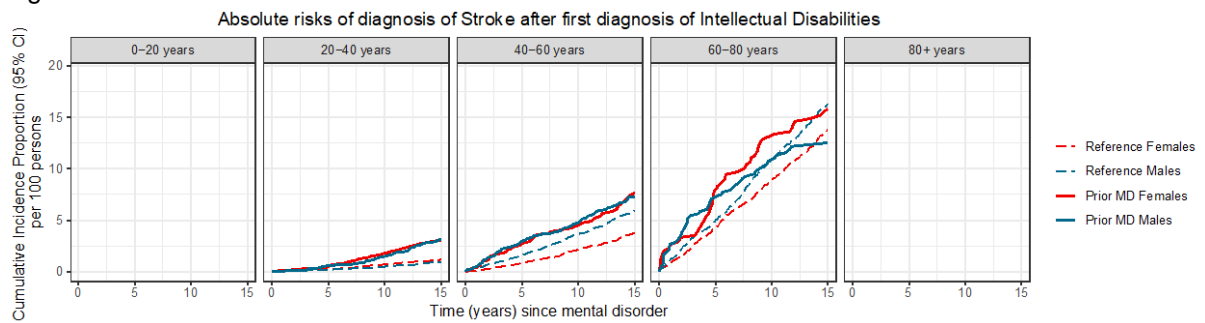

Figure S140.8 – Diabetes Mellitus

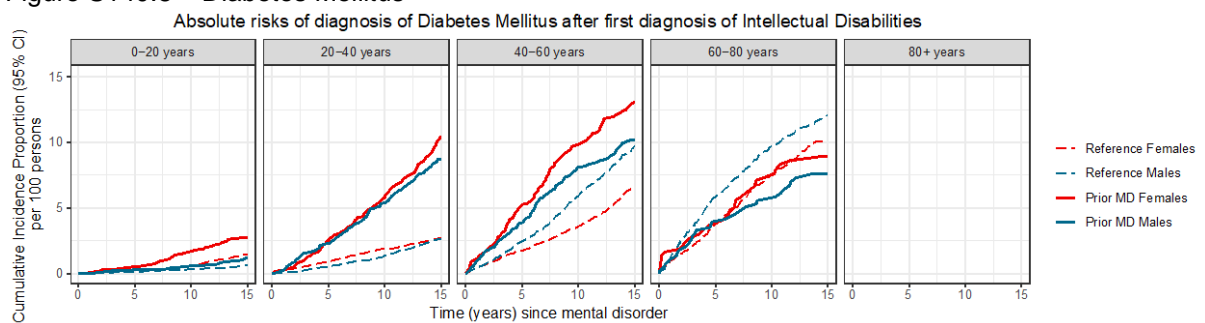

Figure S140.9 – Thyroid Disorders

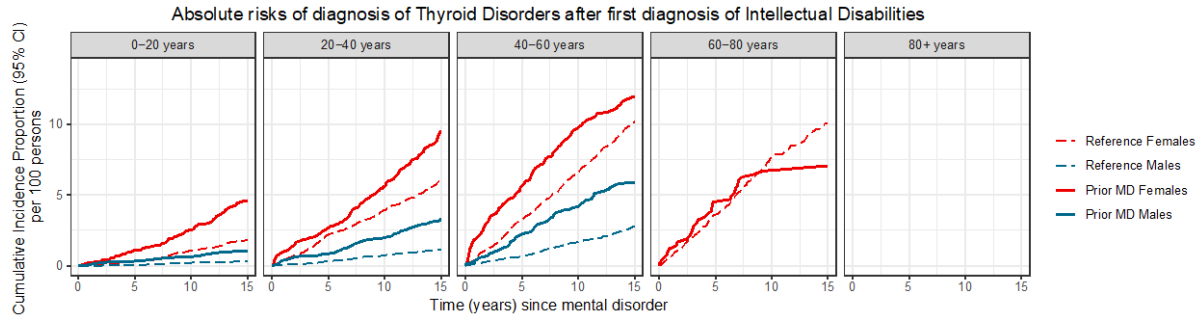

Figure S140.10 – Gout



Figure S140.11 – Chronic Pulmonary Disease

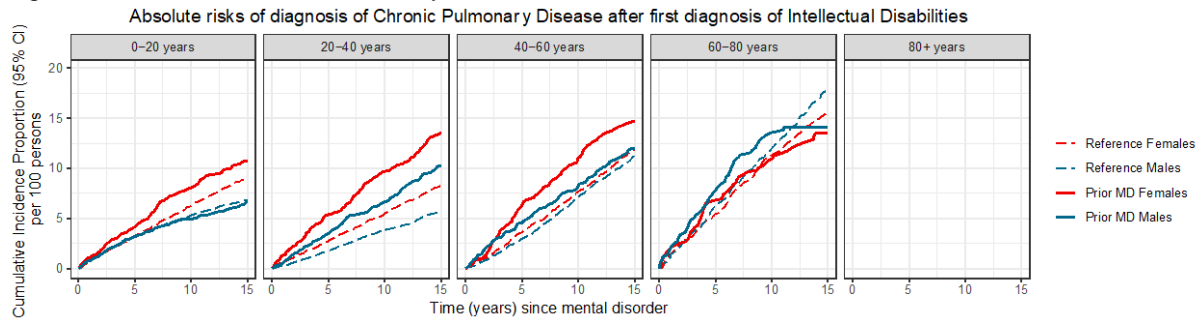

Figure S140.12 – Allergy

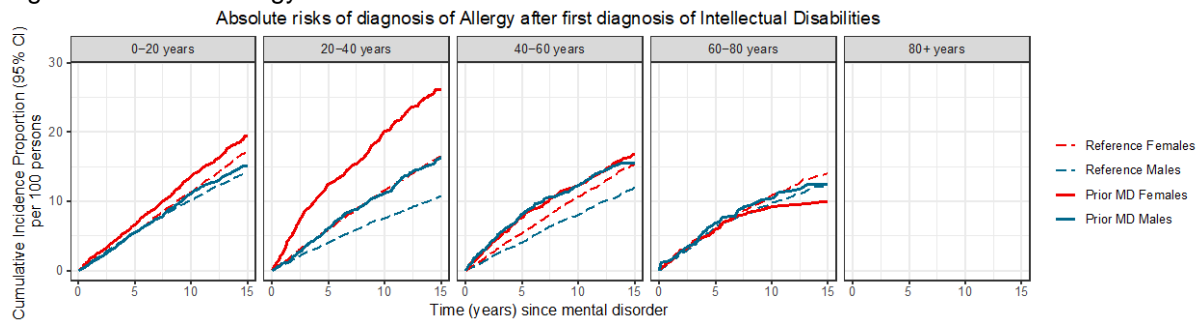

Figure S140.13 – Ulcer/Chronic Gastritis

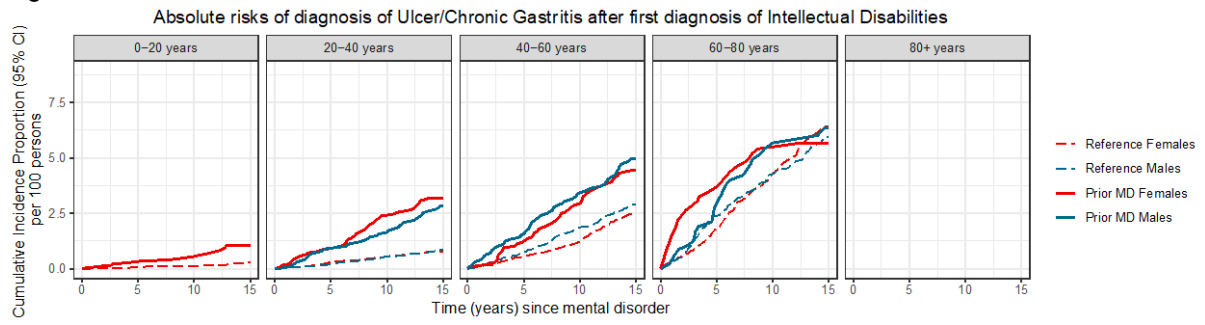

Figure S140.14 – Chronic Liver Disease

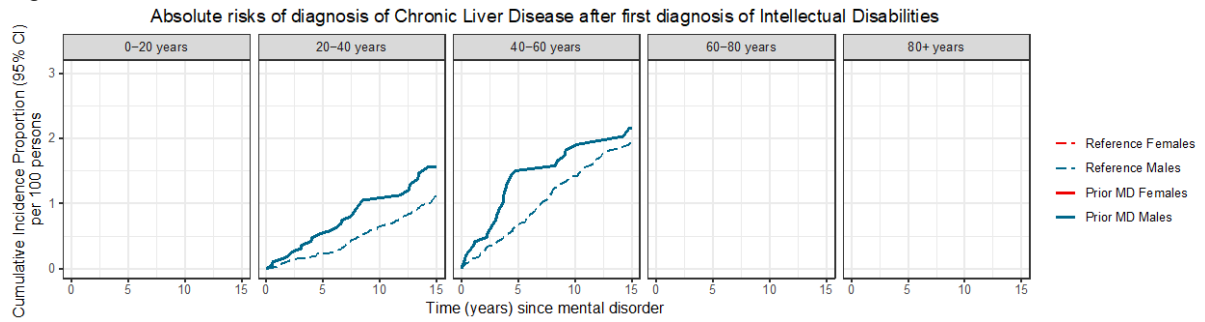

Figure S140.15 – Inflammatory Bowel Disease

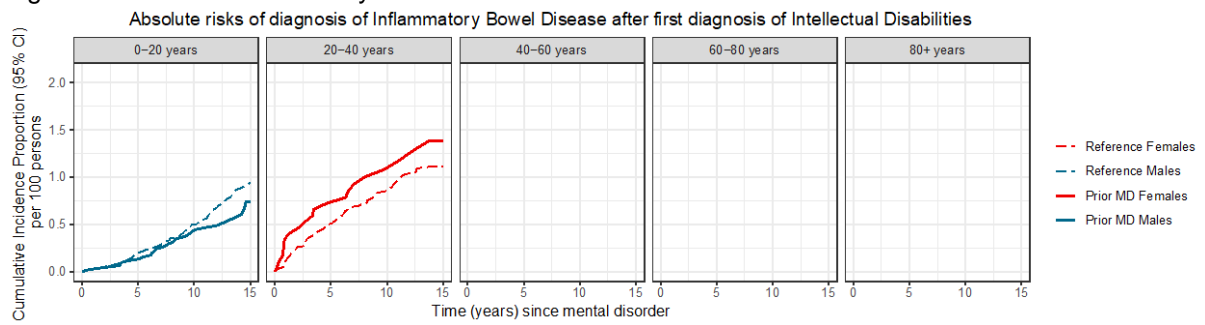

Figure S140.16 – Diverticular Disease of the Intestine

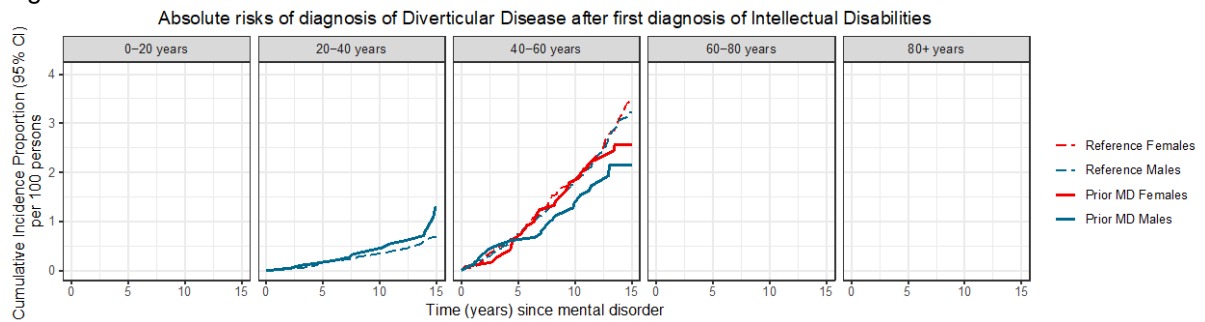

Figure S140.17 – Chronic Kidney Disease

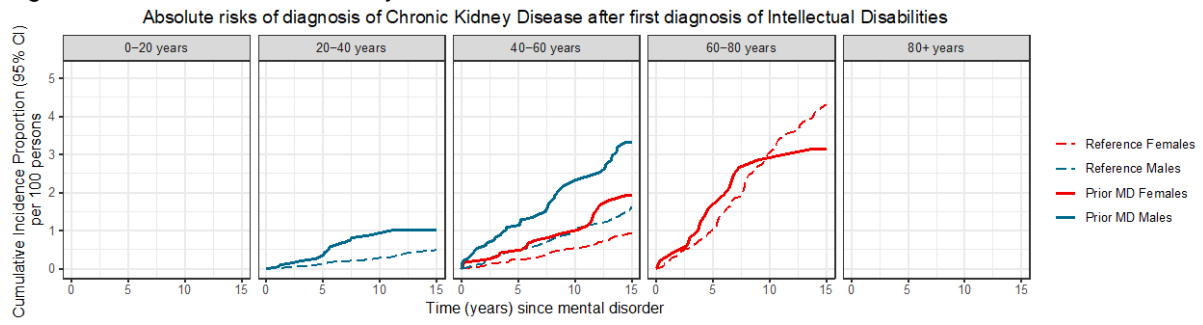

Figure S140.18 – Prostate Disorders

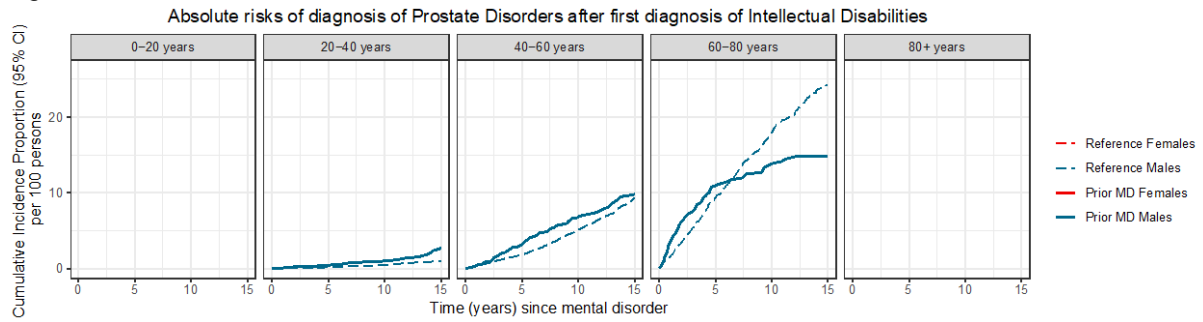

Figure S140.19 – Connective Tissue Disorders

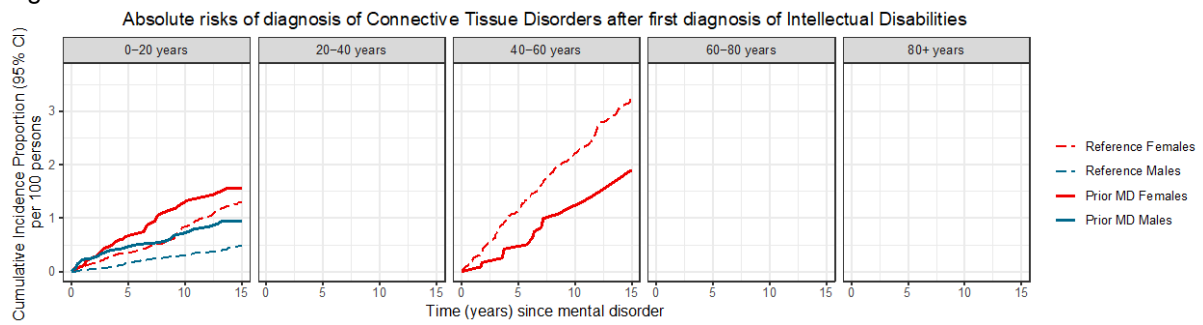

Figure S140.20 – Osteoporosis

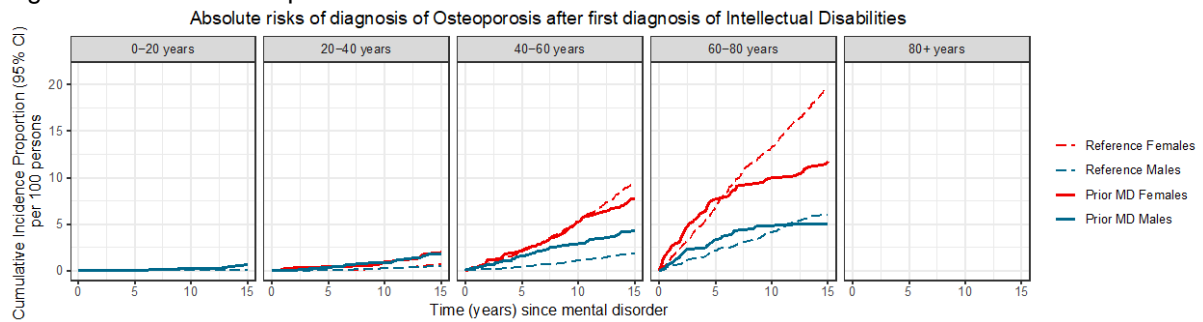

Figure S140.21 – Painful Conditions

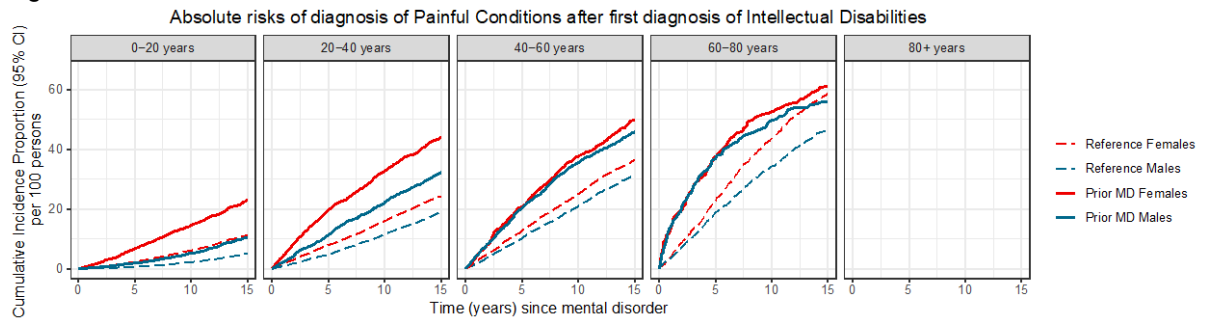

Figure S140.22 – HIV/AIDS

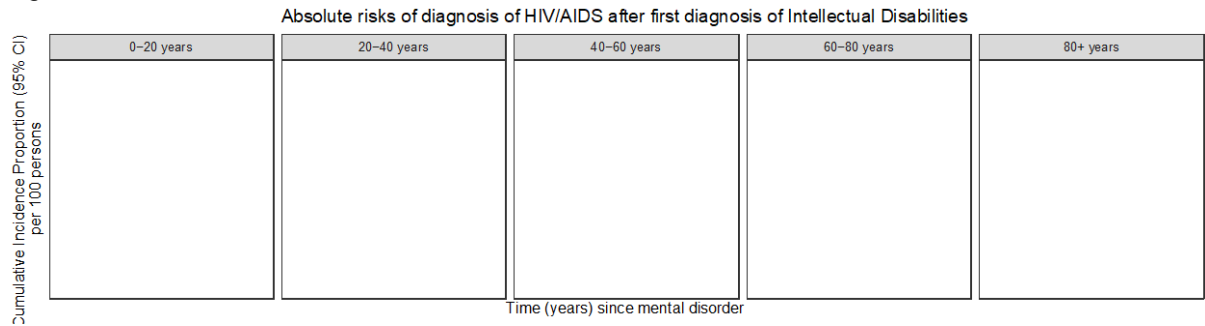

Figure S140.23 – Anemias

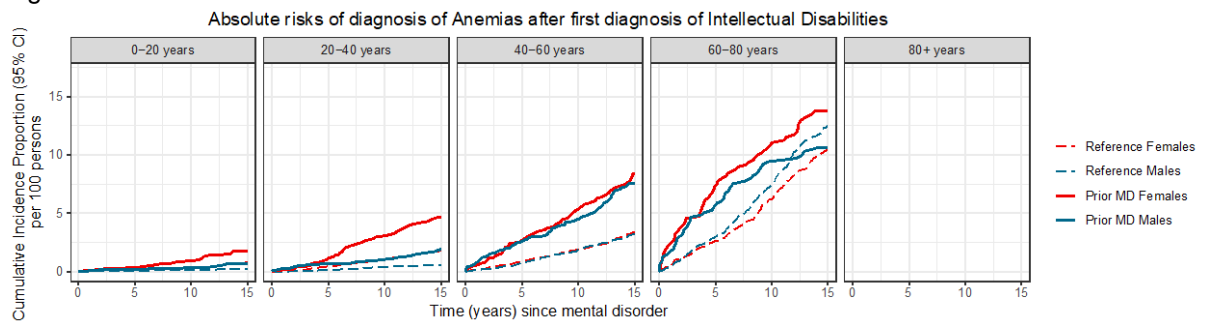

Figure S140.24 – Cancer

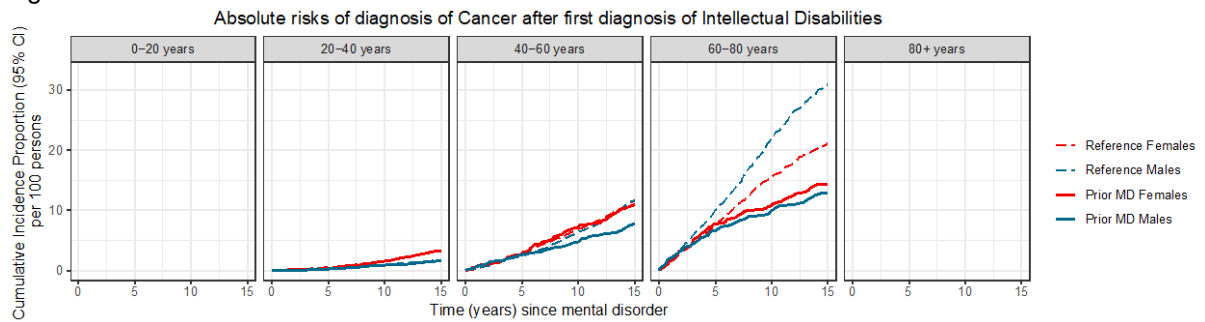

Figure S140.25 – Vision Problems

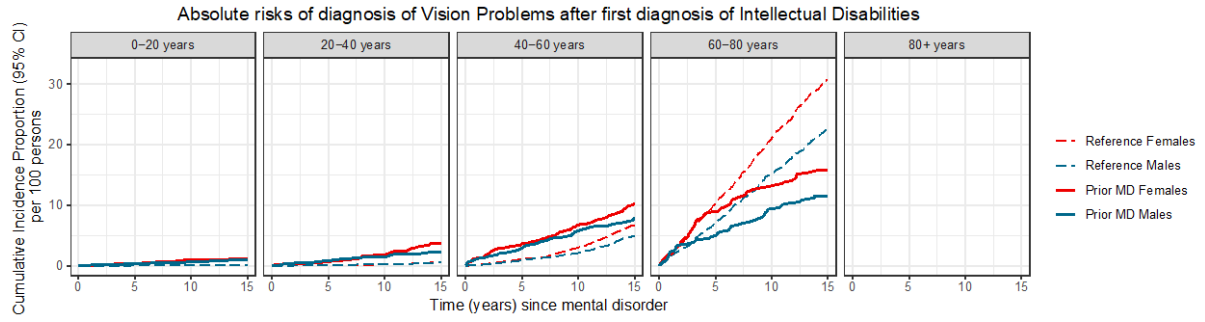

Figure S140.26 – Hearing Problems

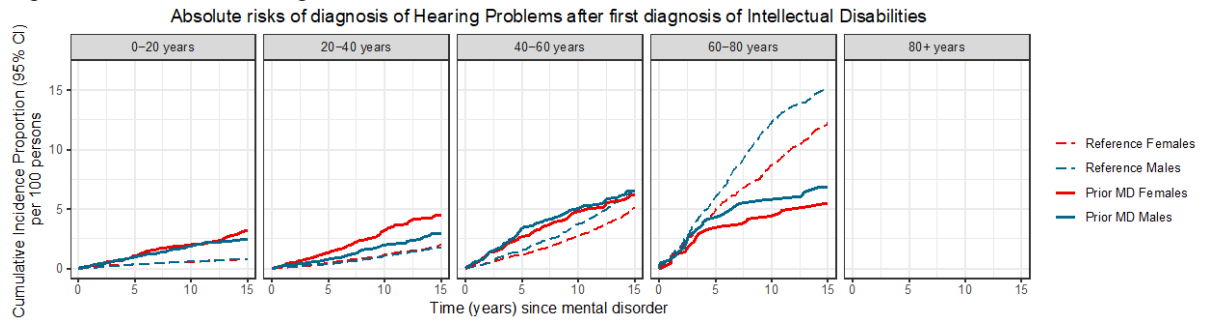

Figure S140.27 – Migraine

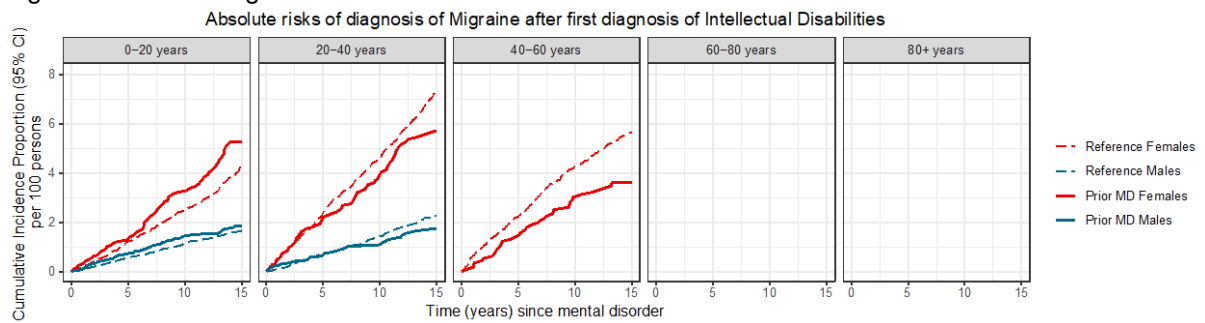

Figure S140.28 – Epilepsy

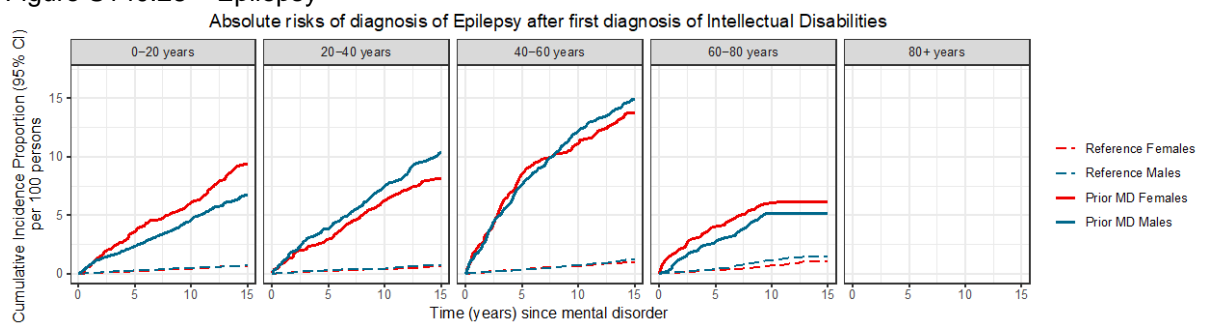

Figure S140.29 – Parkinson's Disease

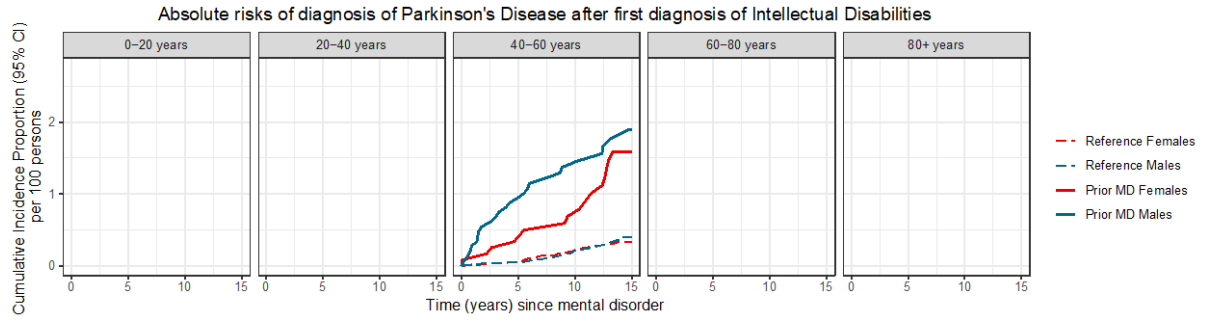

Figure S140.30 – Multiple Sclerosis



Figure S140.31 – Neuropathies

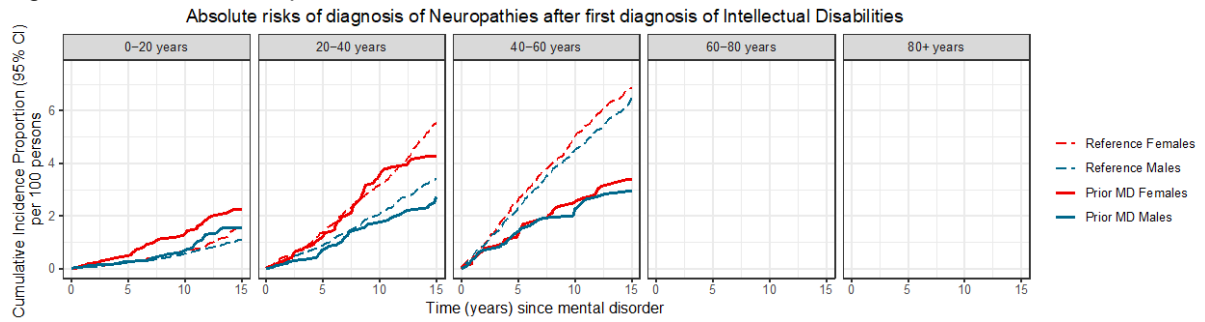



**Figures S141.1-S141.31. Sex-specific absolute risks of being diagnosed with general medical conditions after a first diagnosis of Developmental Disorders**

**Figure S141.1 - Hypertension**

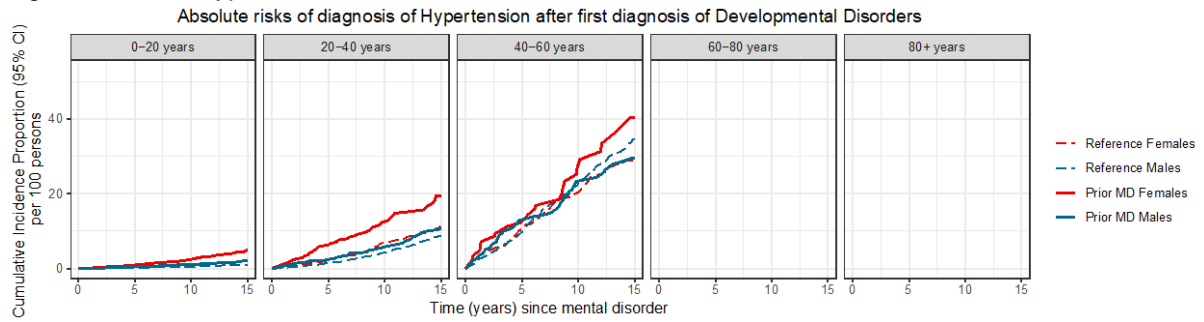

**Figure S141.2 – Dyslipidemia**

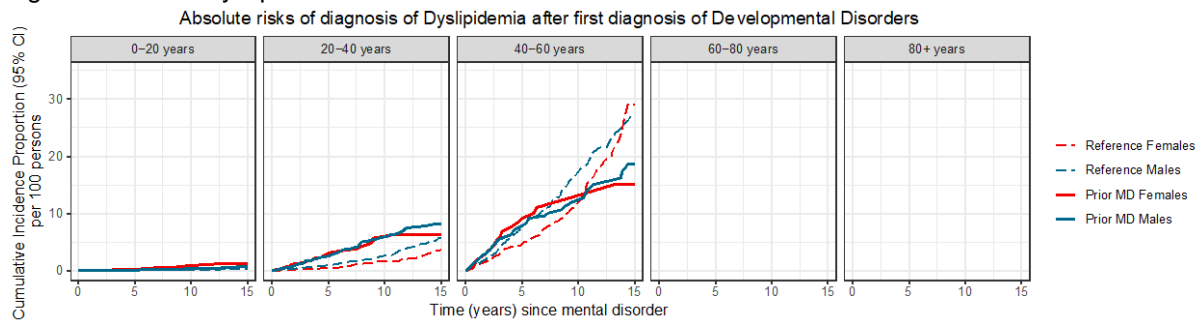

**Figure S141.3 – Ischemic Heart Disease**

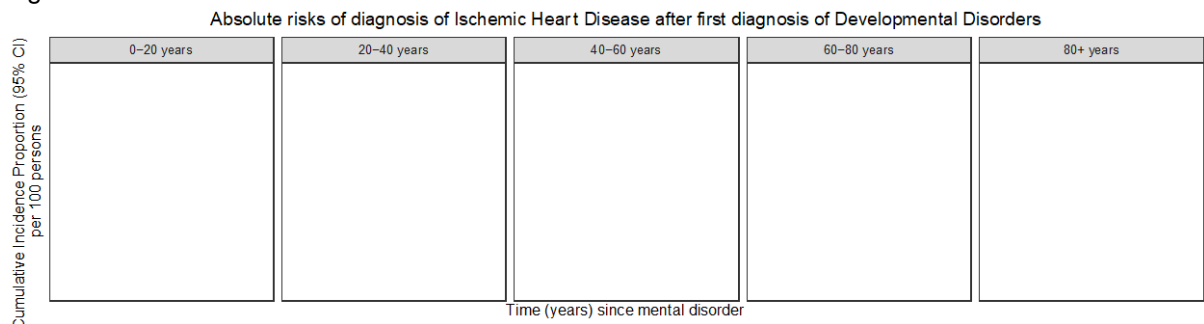

**Figure S141.4 – Atrial Fibrillation**

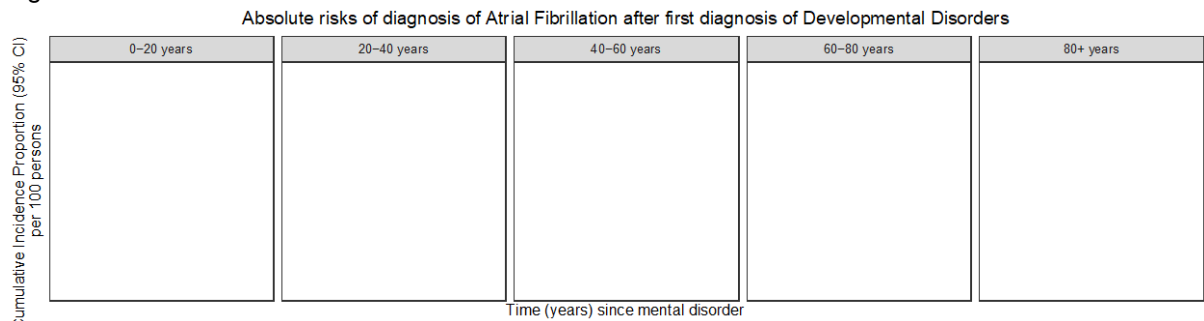

Figure S141.5 – Heart Failure



Figure S141.6 – Peripheral Artery Occlusive Disease

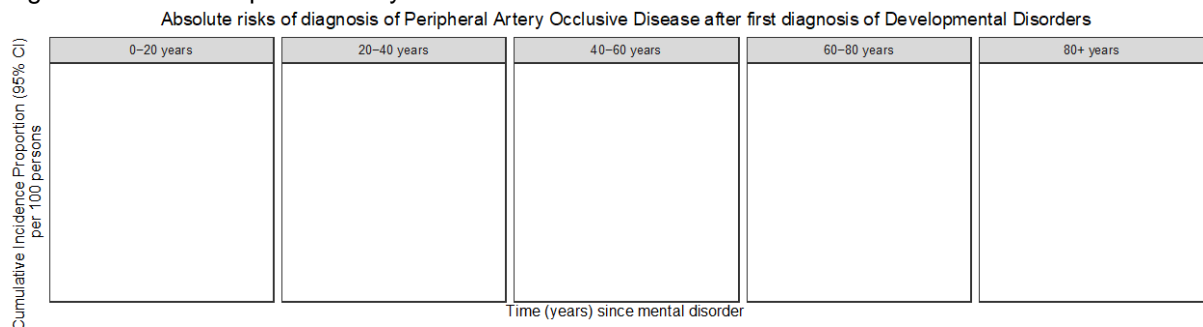

Figure S141.7 – Stroke

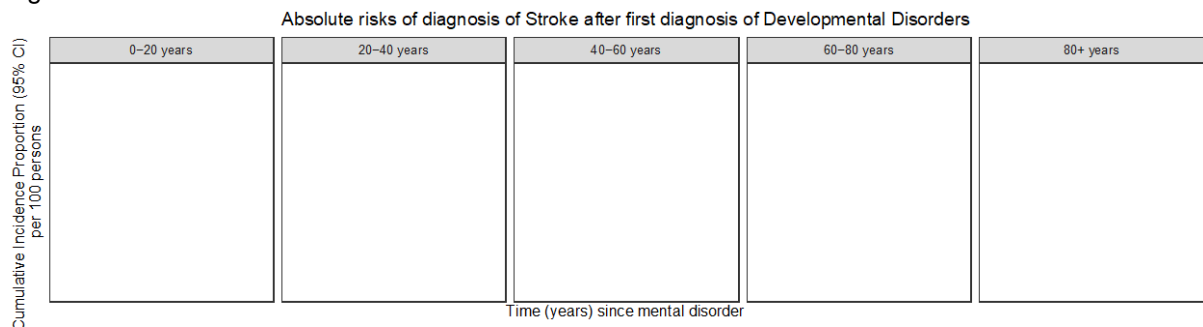

Figure S141.8 – Diabetes Mellitus

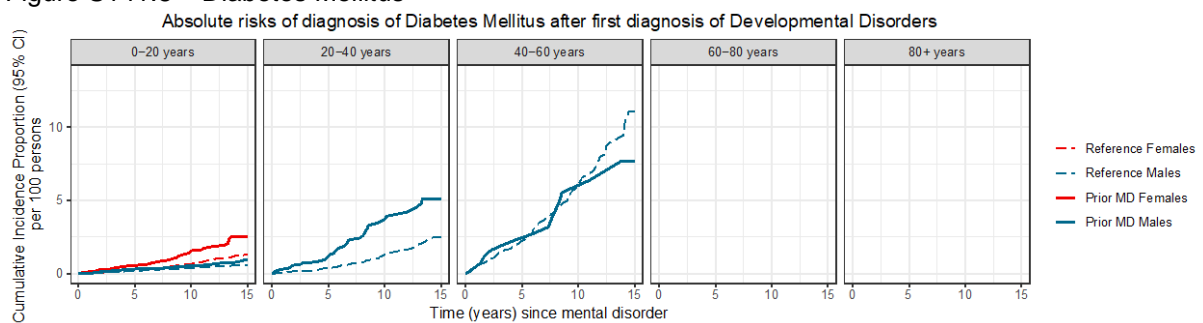

Figure S141.9 – Thyroid Disorders

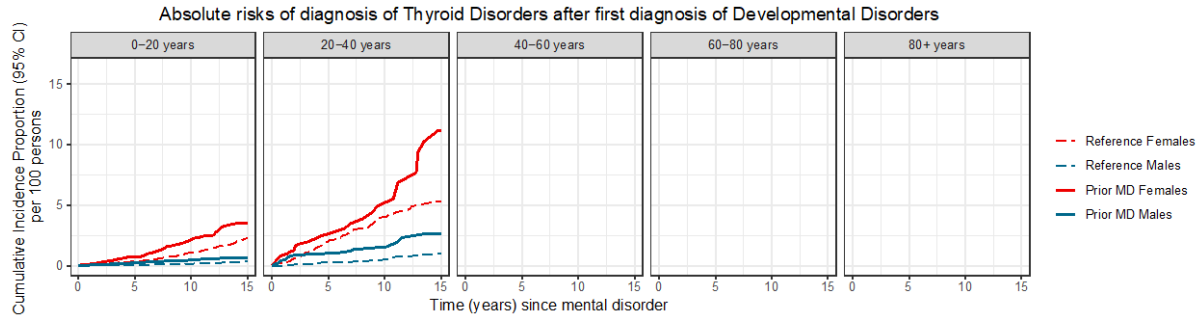

Figure S141.10 – Gout

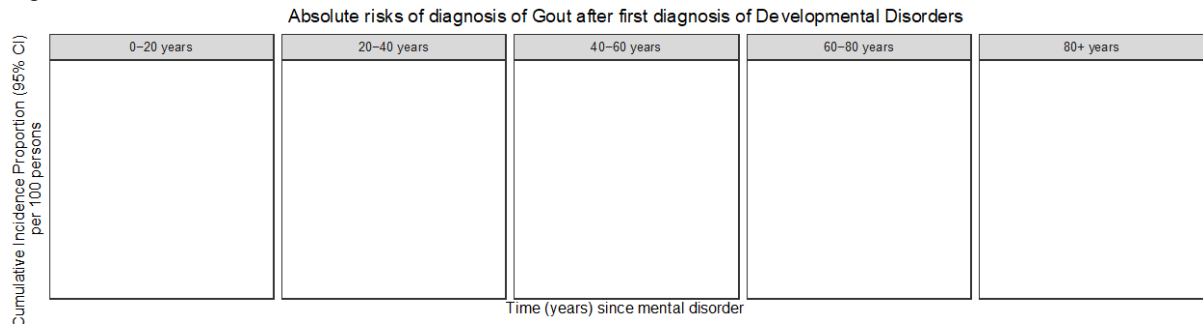

Figure S141.11 – Chronic Pulmonary Disease

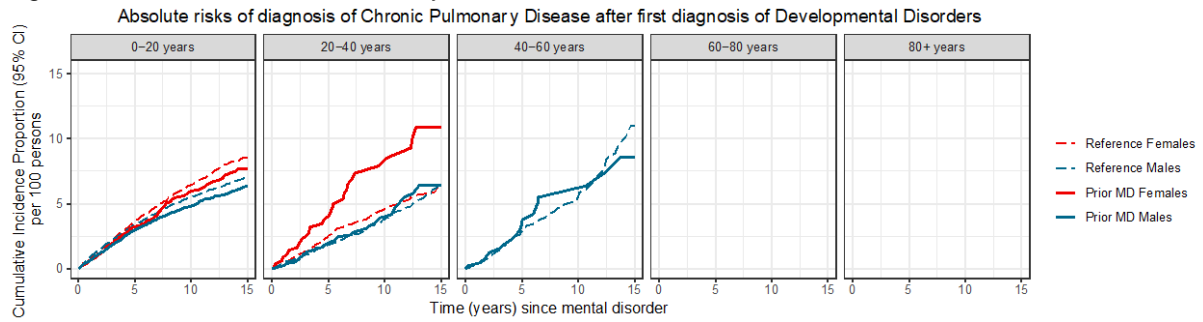

Figure S141.12 – Allergy

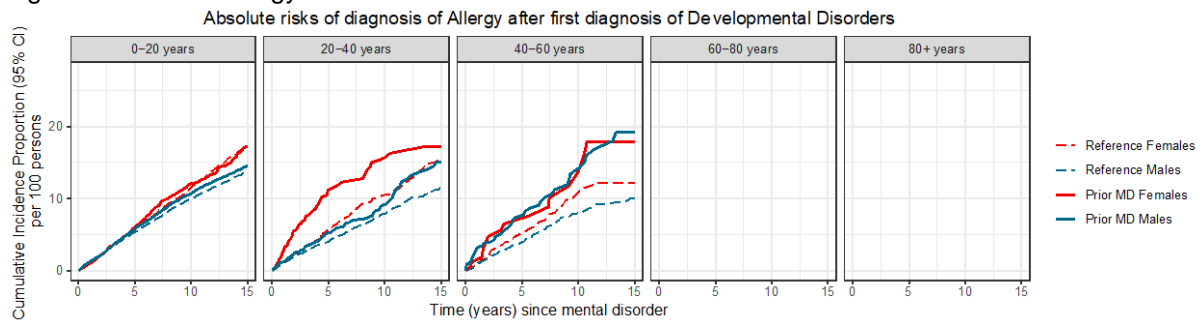

Figure S141.13 – Ulcer/Chronic Gastritis

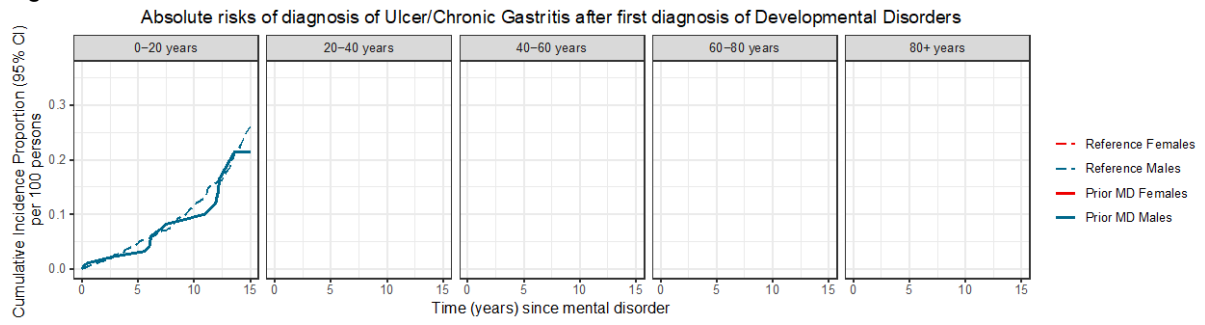

Figure S141.14 – Chronic Liver Disease

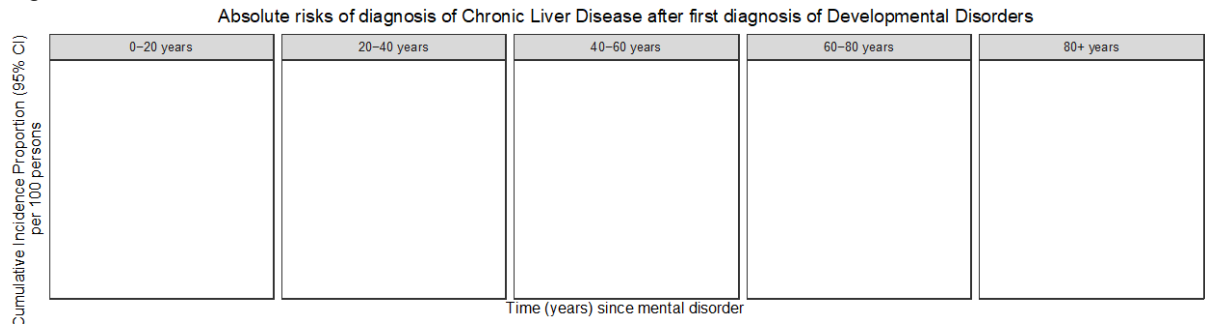

Figure S141.15 – Inflammatory Bowel Disease

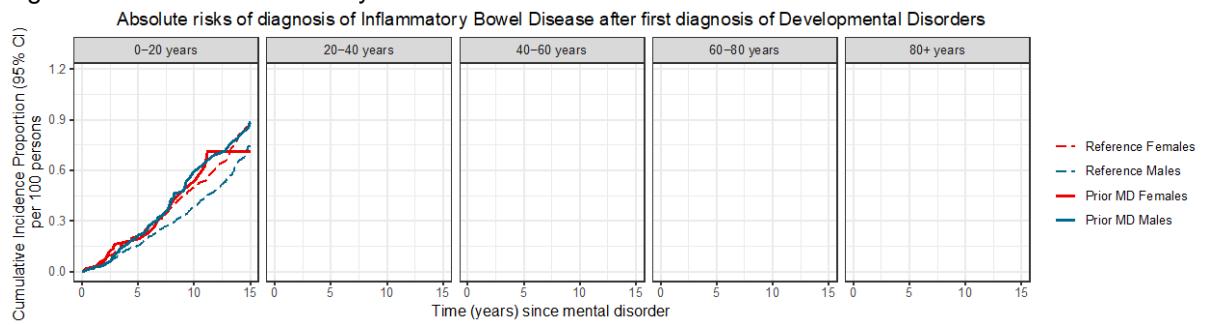

Figure S141.16 – Diverticular Disease of the Intestine

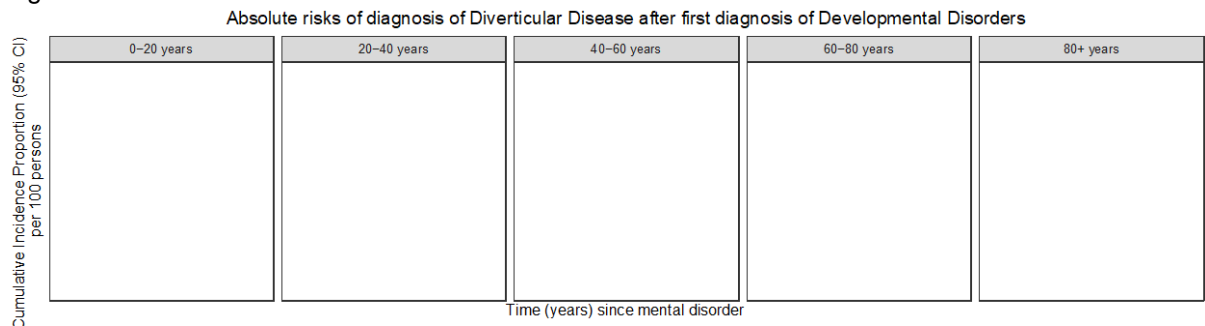

Figure S141.17 – Chronic Kidney Disease

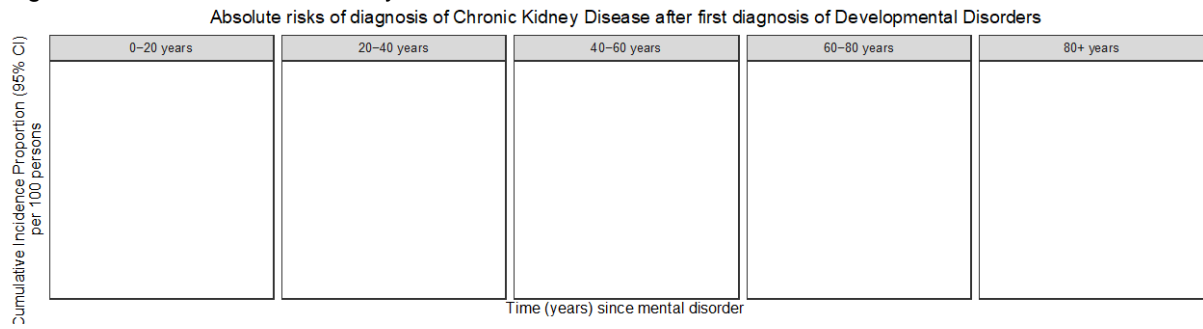

Figure S141.18 – Prostate Disorders

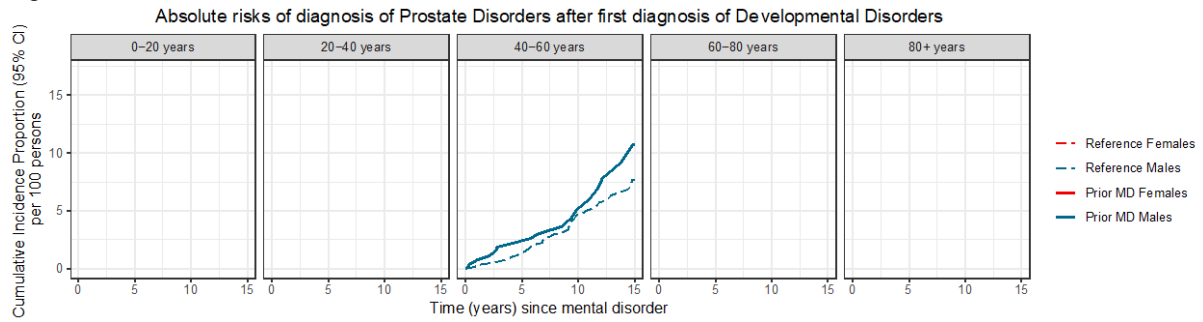

Figure S141.19 – Connective Tissue Disorders

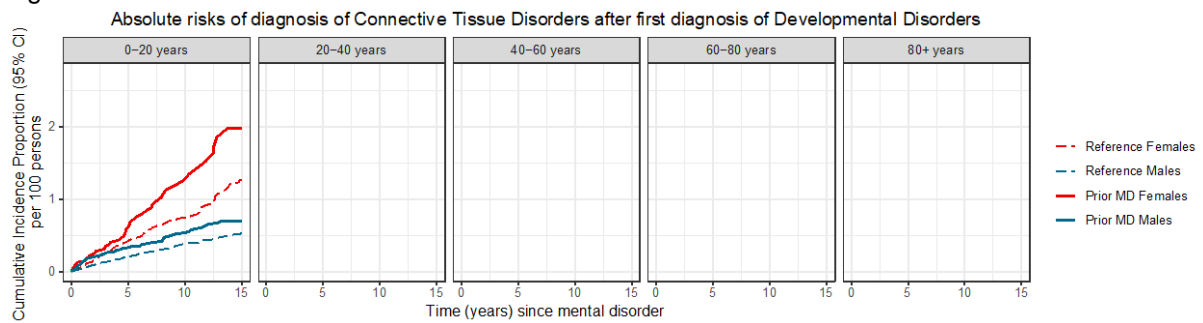

Figure S141.20 – Osteoporosis

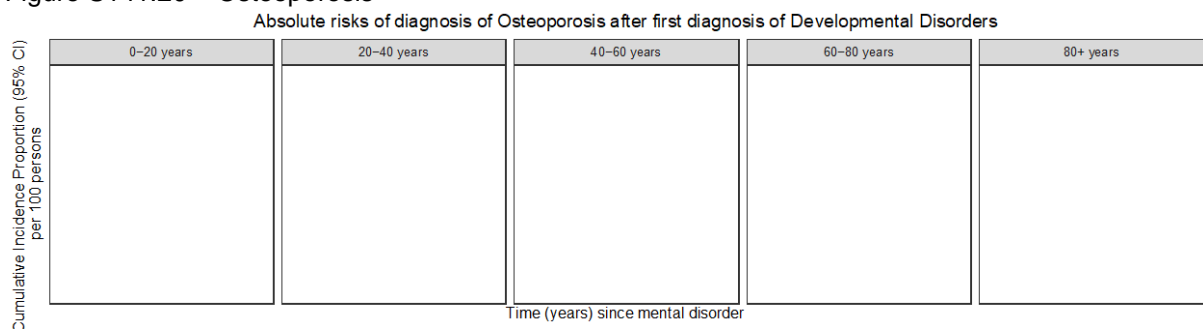

Figure S141.21 – Painful Conditions

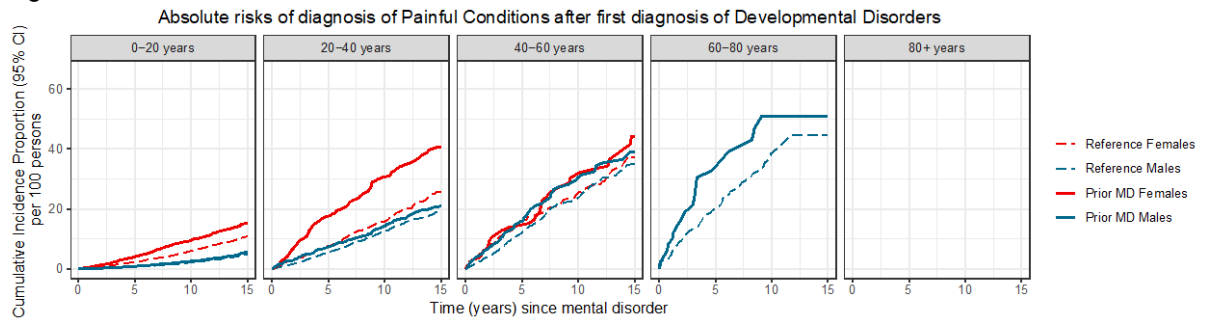

Figure S141.22 – HIV/AIDS



Figure S141.23 – Anemias

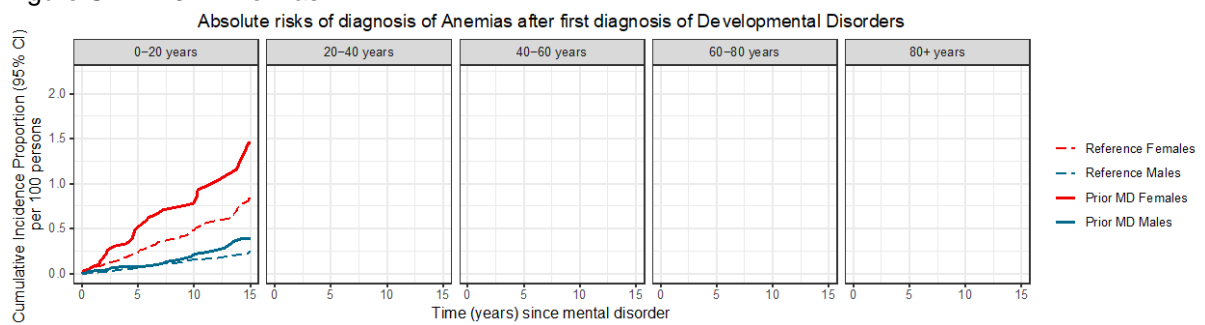

Figure S141.24 – Cancer

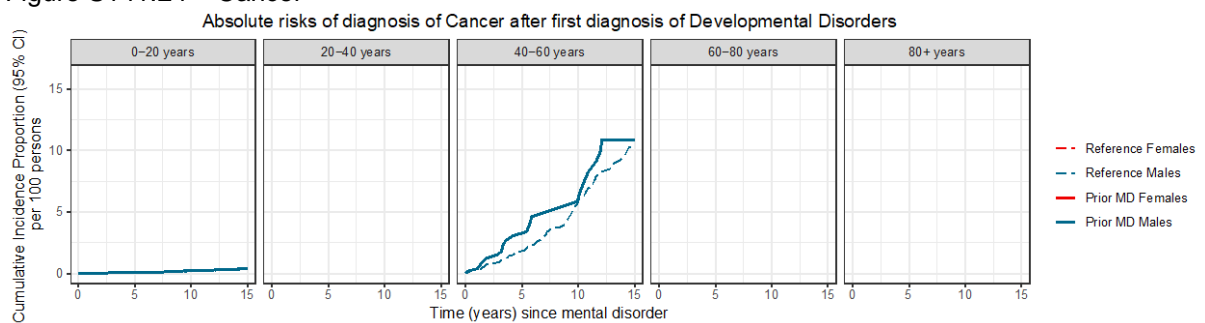

Figure S141.25 – Vision Problems

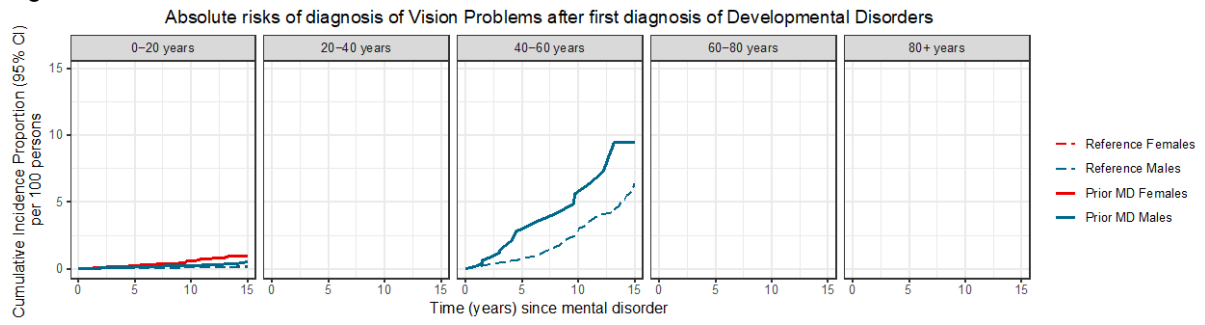

Figure S141.26 – Hearing Problems

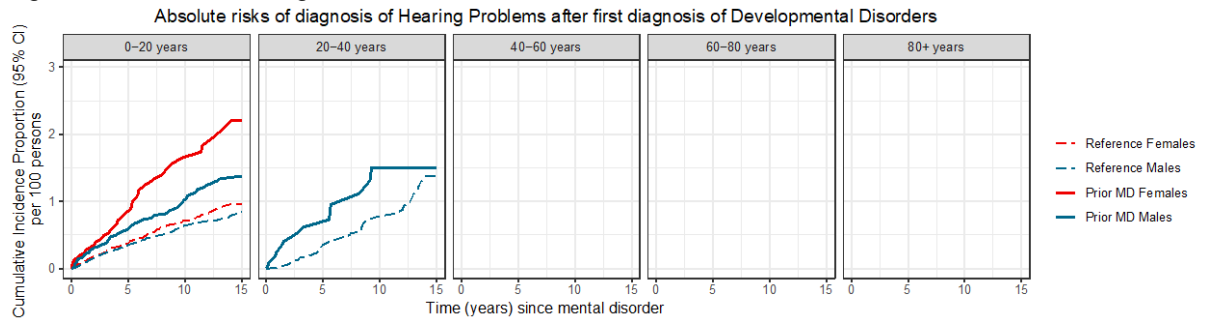

Figure S141.27 – Migraine

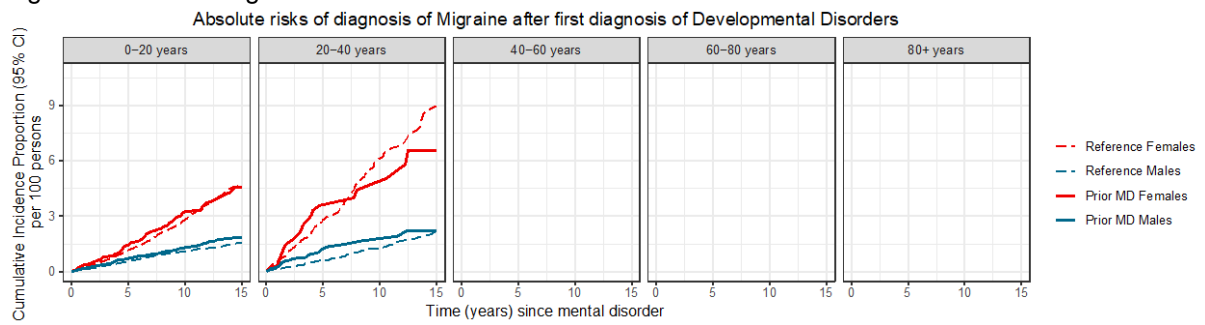

Figure S141.28 – Epilepsy

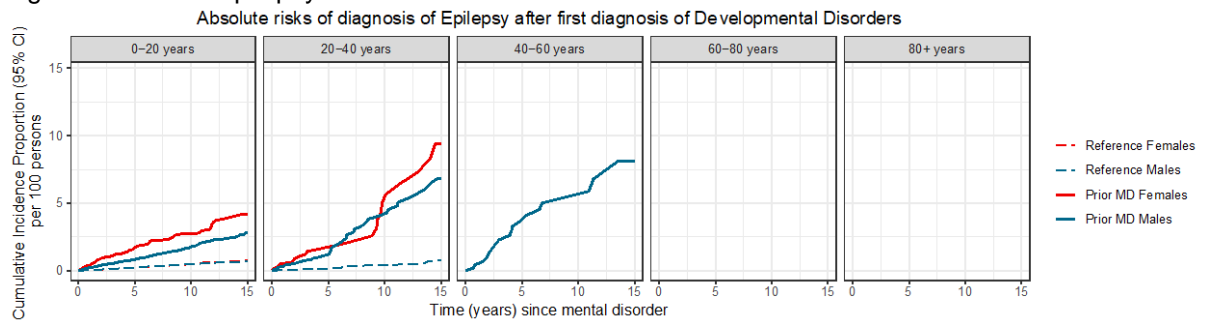

Figure S141.29 – Parkinson's Disease



Figure S141.30 – Multiple Sclerosis

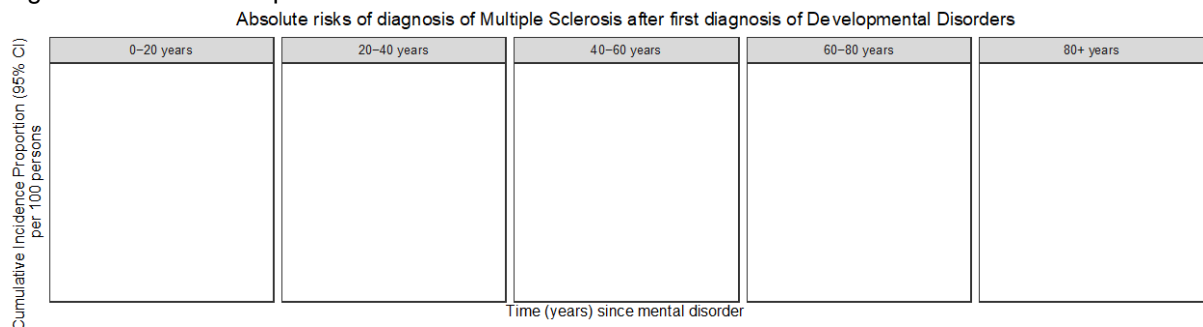

Figure S141.31 – Neuropathies

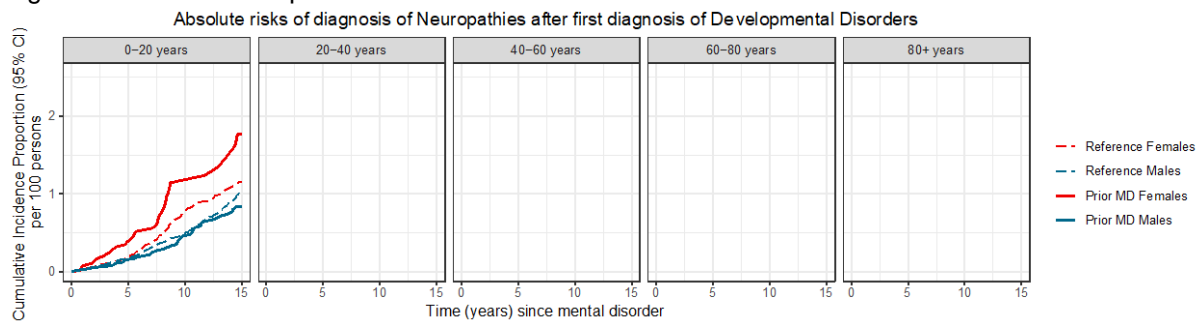



**Figures S142.1-S142.31. Sex-specific absolute risks of being diagnosed with general medical conditions after a first diagnosis of Behavioral Disorders**

**Figure S142.1 - Hypertension**

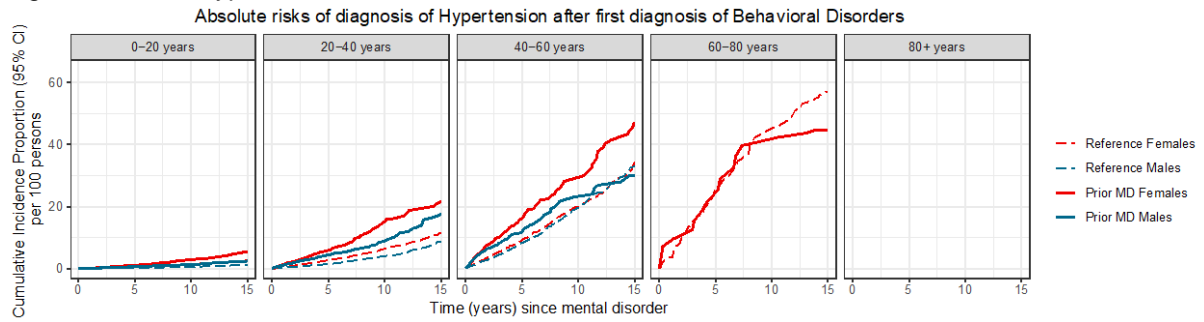

**Figure S142.2 – Dyslipidemia**

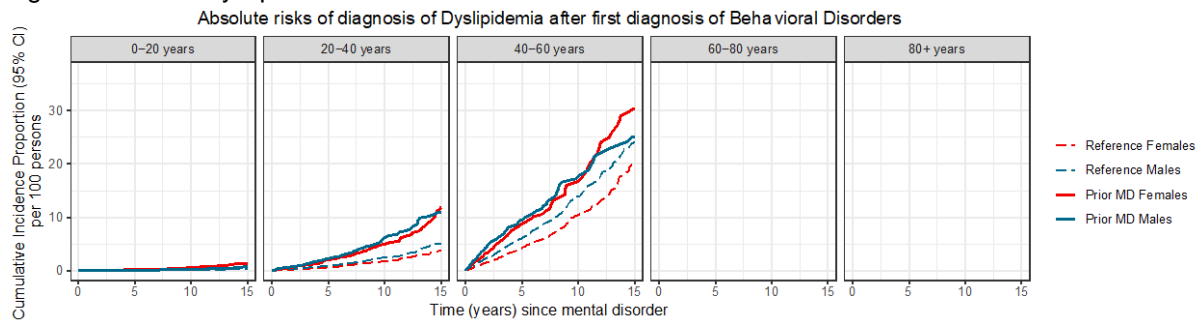

**Figure S142.3 – Ischemic Heart Disease**

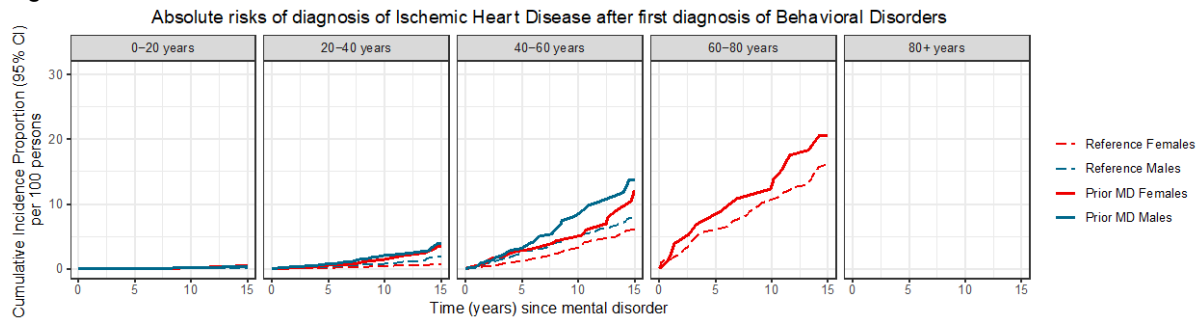

**Figure S142.4 – Atrial Fibrillation**

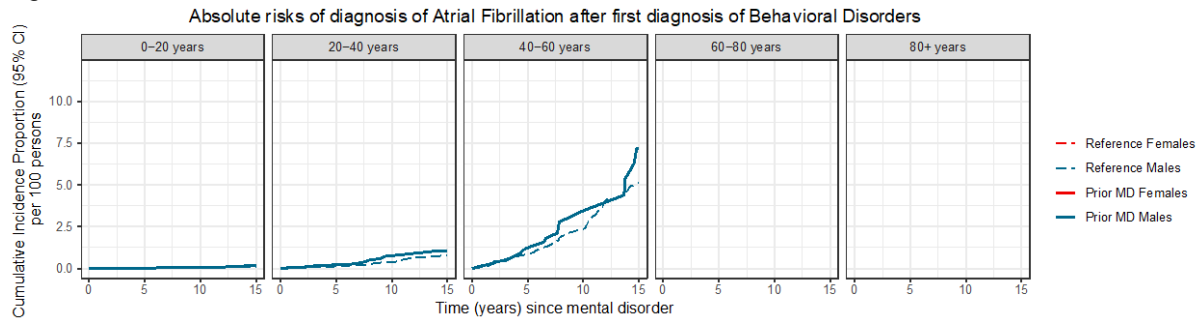

Figure S142.5 – Heart Failure

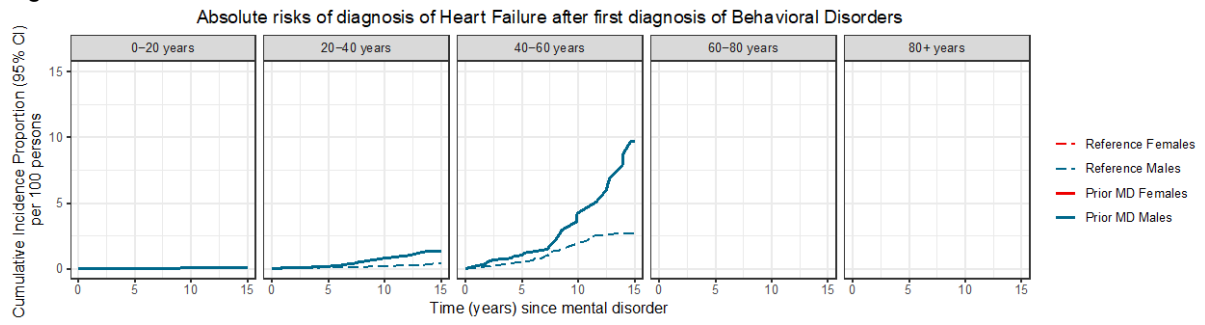

Figure S142.6 – Peripheral Artery Occlusive Disease

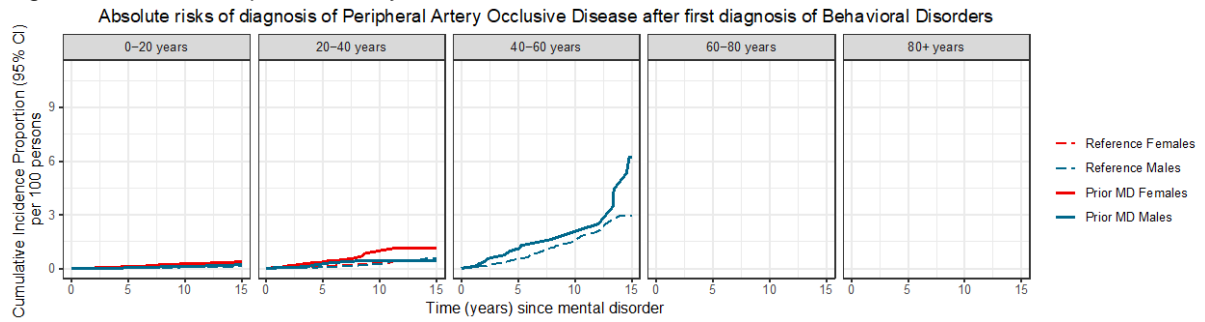

Figure S142.7 – Stroke

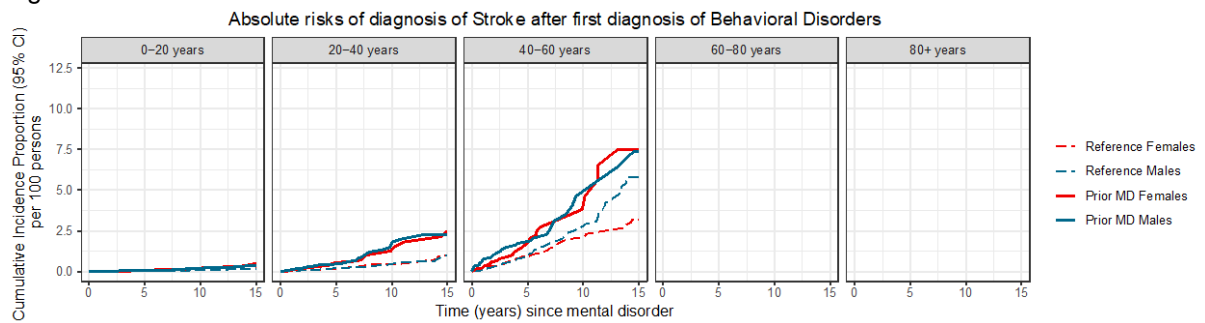

Figure S142.8 – Diabetes Mellitus

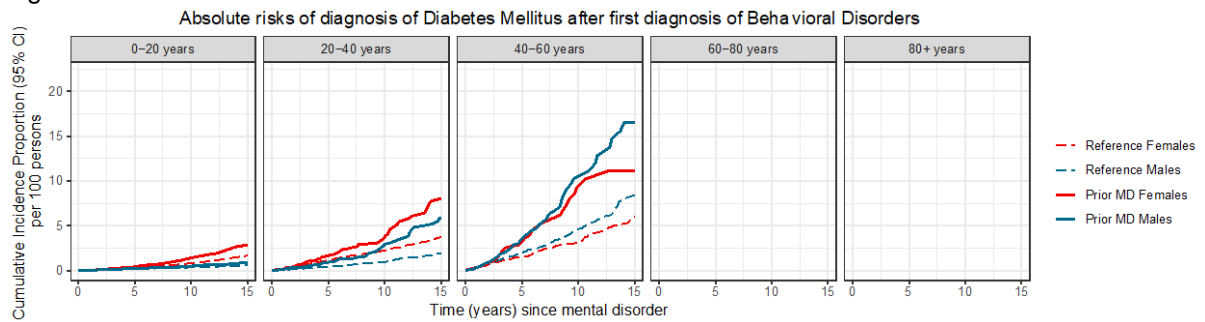

Figure S142.9 – Thyroid Disorders

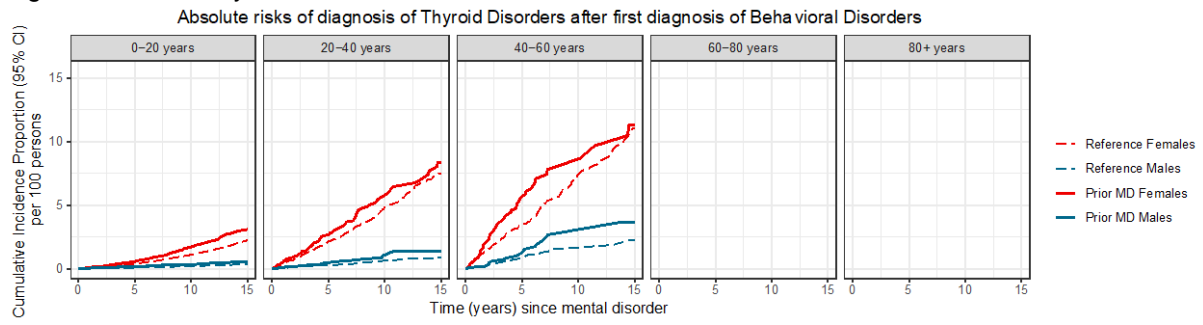

Figure S142.10 – Gout

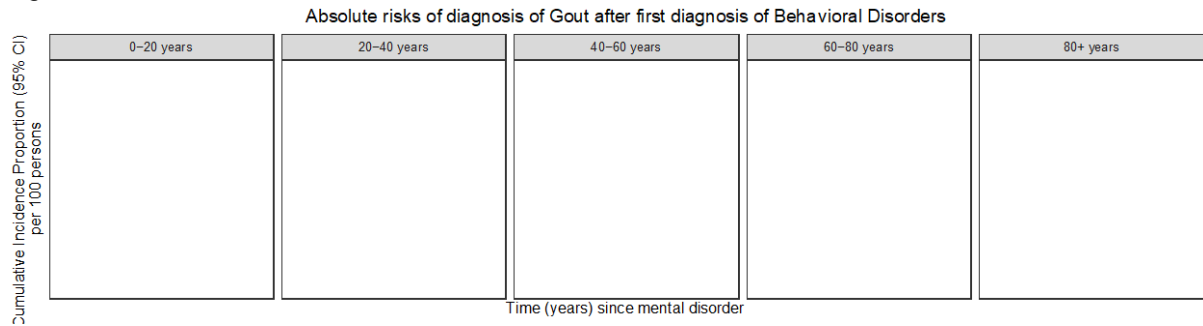

Figure S142.11 – Chronic Pulmonary Disease

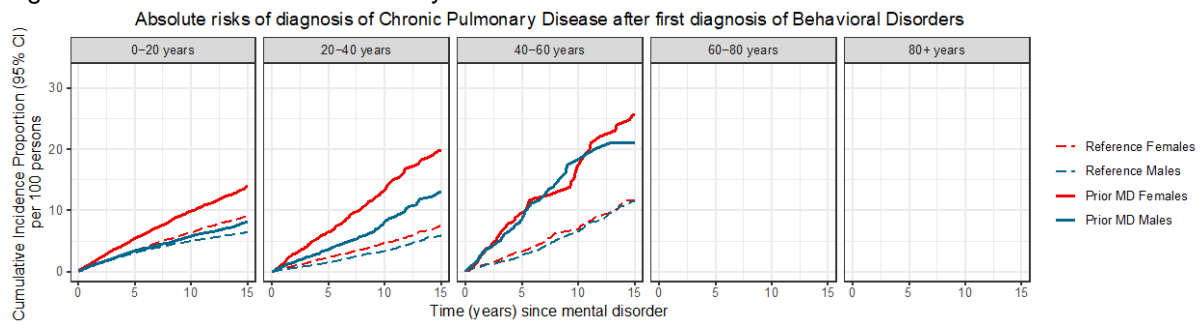

Figure S142.12 – Allergy

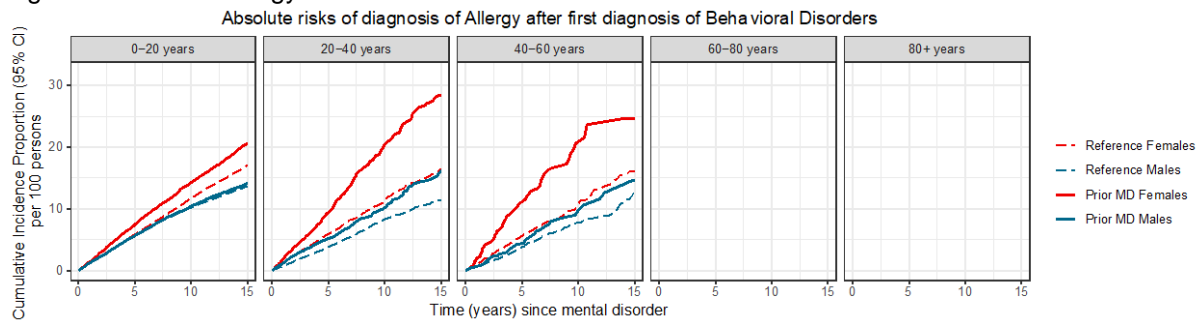

Figure S142.13 – Ulcer/Chronic Gastritis

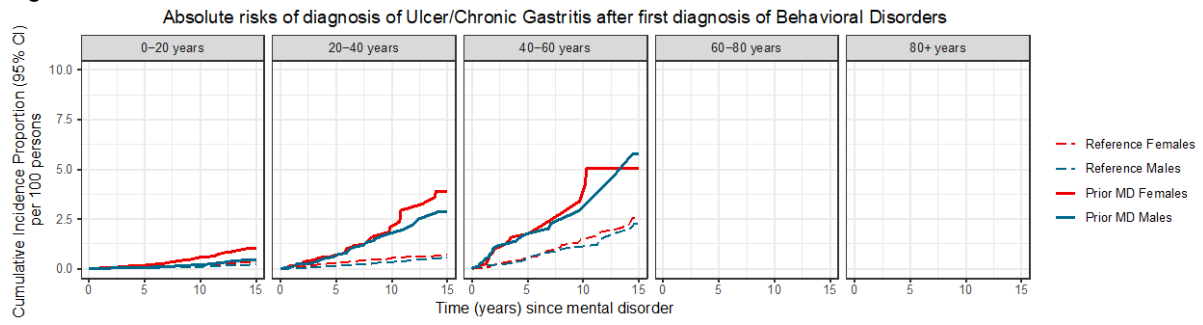

Figure S142.14 – Chronic Liver Disease

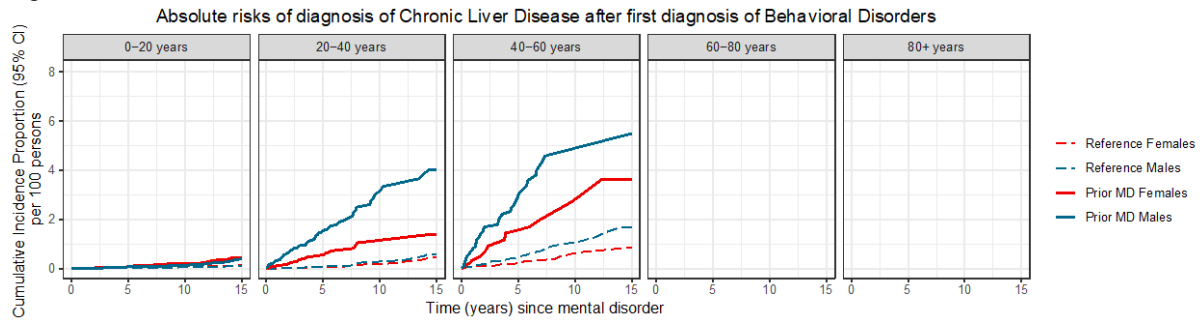

Figure S142.15 – Inflammatory Bowel Disease

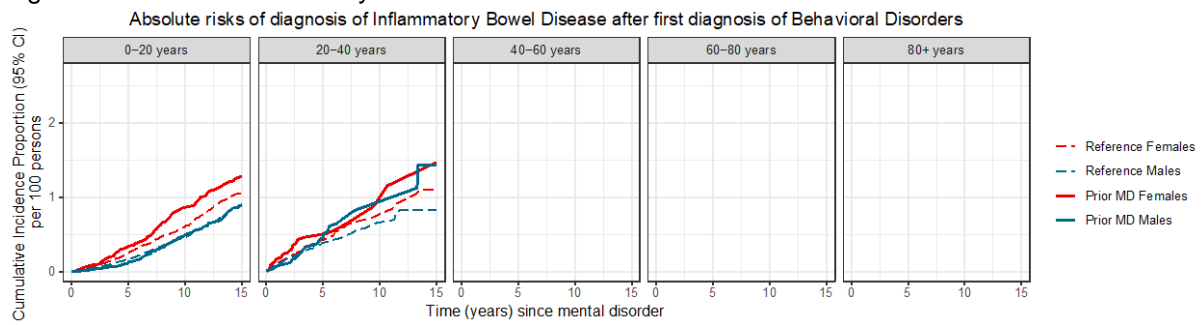

Figure S142.16 – Diverticular Disease of the Intestine

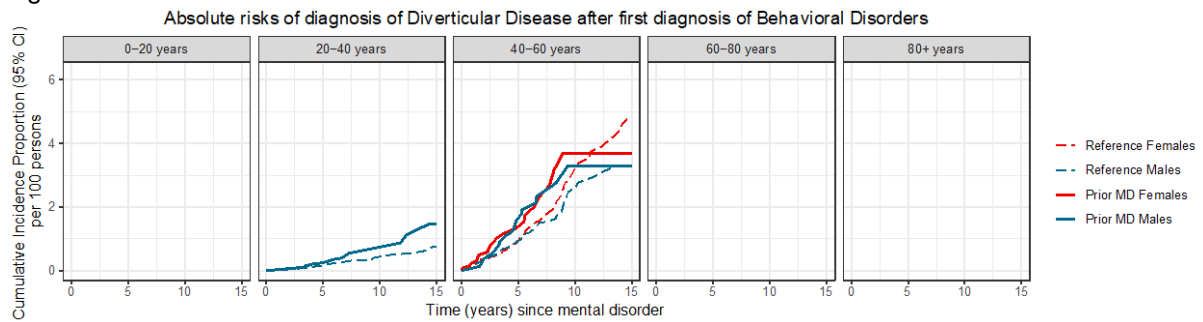

Figure S142.17 – Chronic Kidney Disease

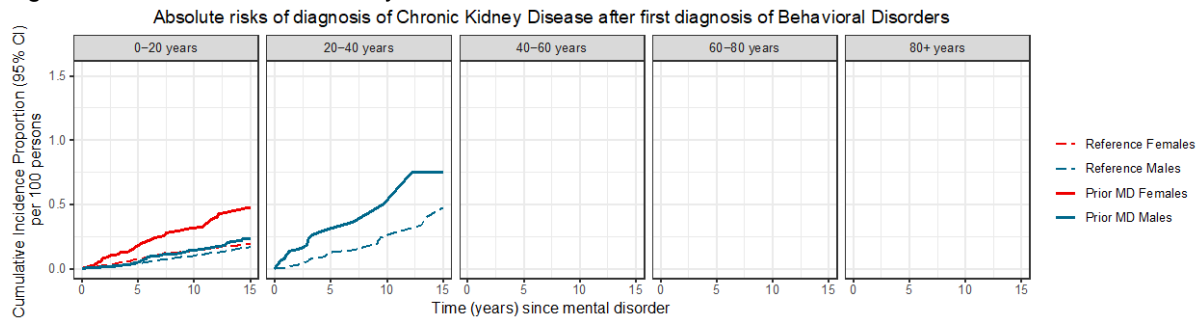

Figure S142.18 – Prostate Disorders

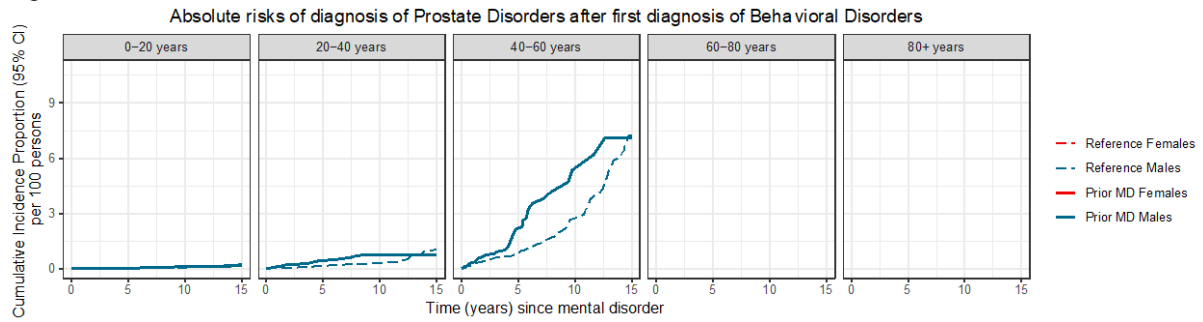

Figure S142.19 – Connective Tissue Disorders

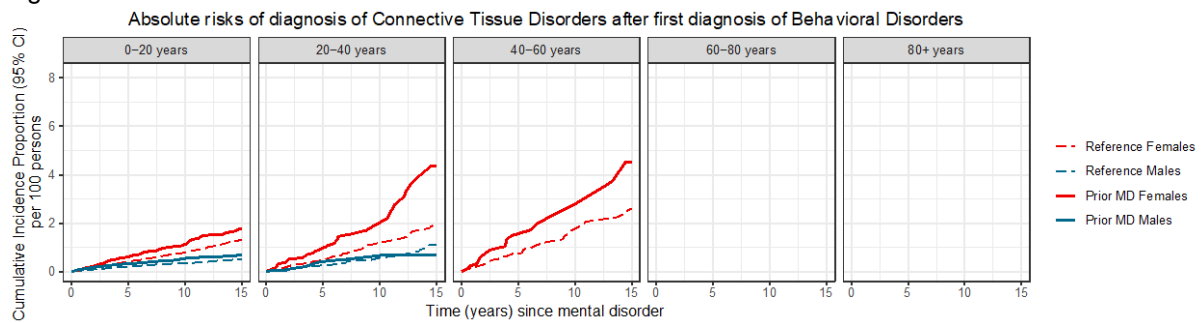

Figure S142.20 – Osteoporosis

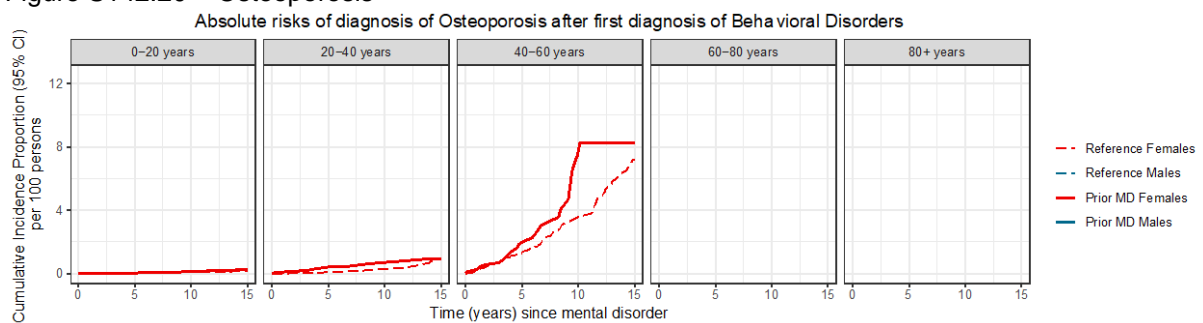

Figure S142.21 – Painful Conditions

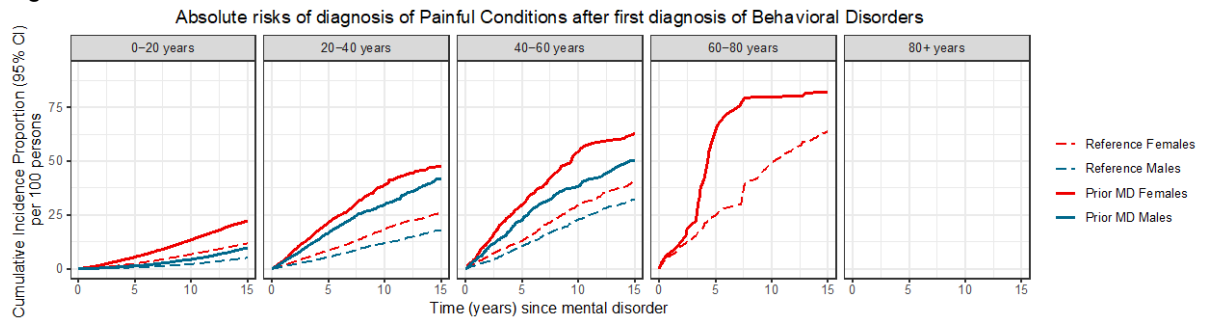

Figure S142.22 – HIV/AIDS

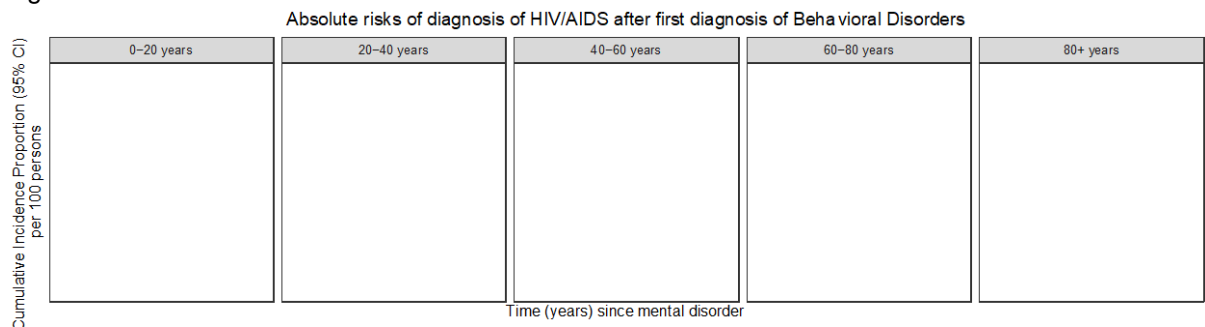

Figure S142.23 – Anemias

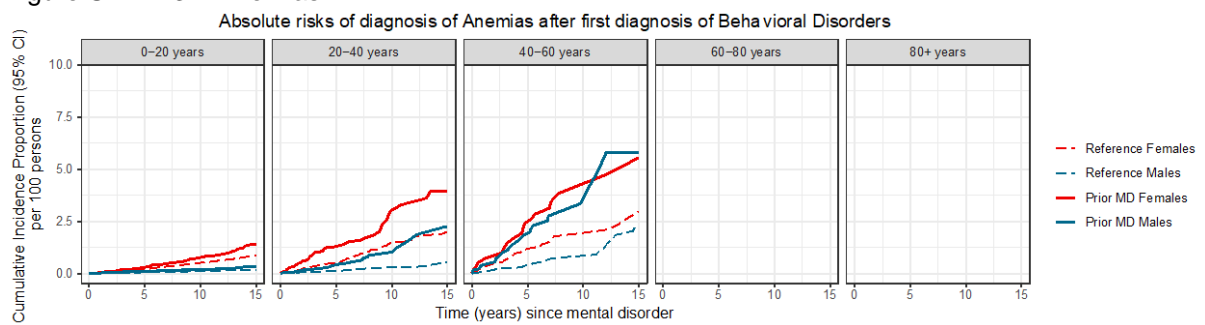

Figure S142.24 – Cancer

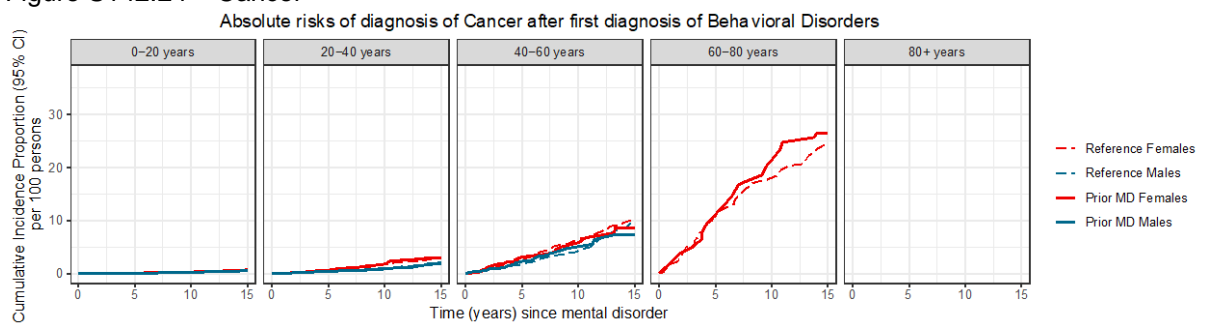

Figure S142.25 – Vision Problems

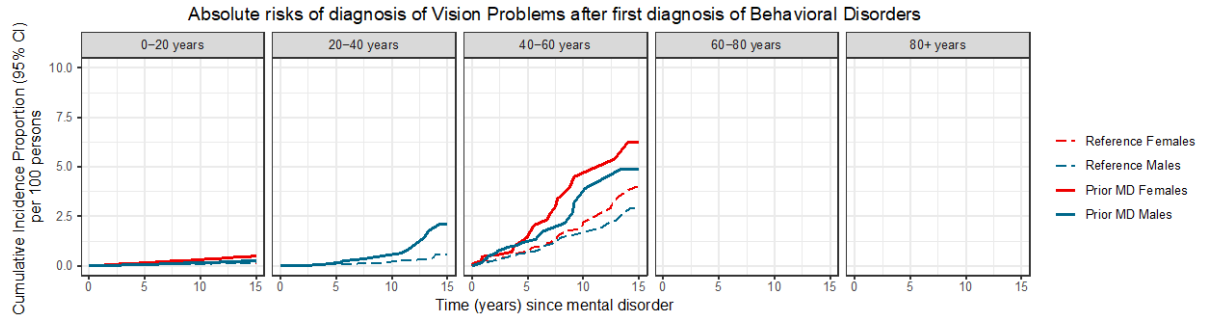

Figure S142.26 – Hearing Problems

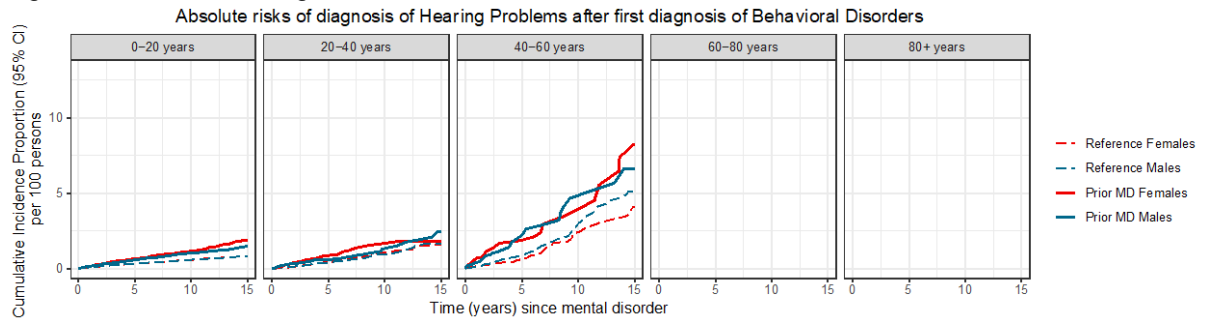

Figure S142.27 – Migraine

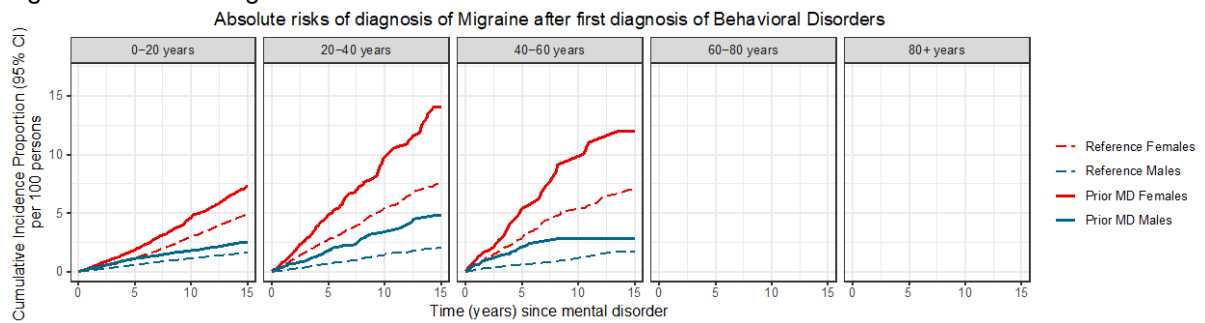

Figure S142.28 – Epilepsy

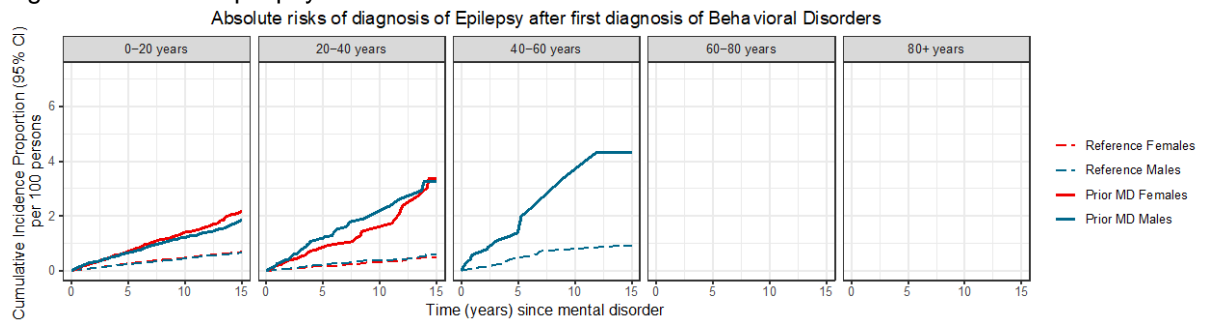

Figure S142.29 – Parkinson's Disease



Figure S142.30 – Multiple Sclerosis

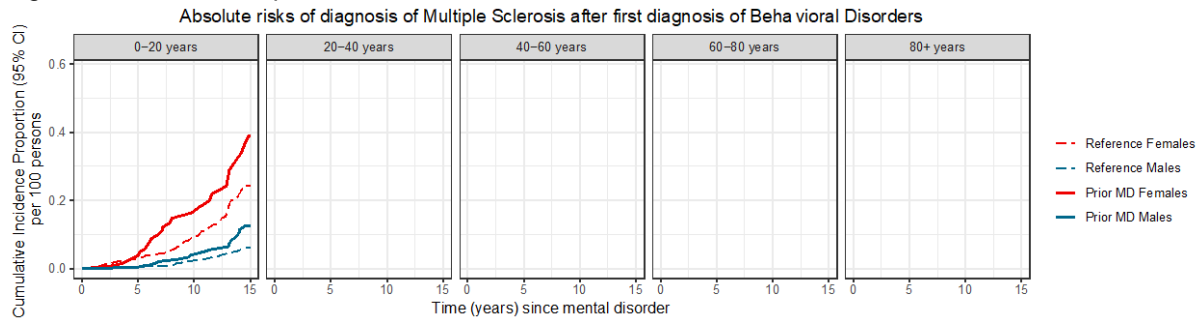

Figure S142.31 – Neuropathies

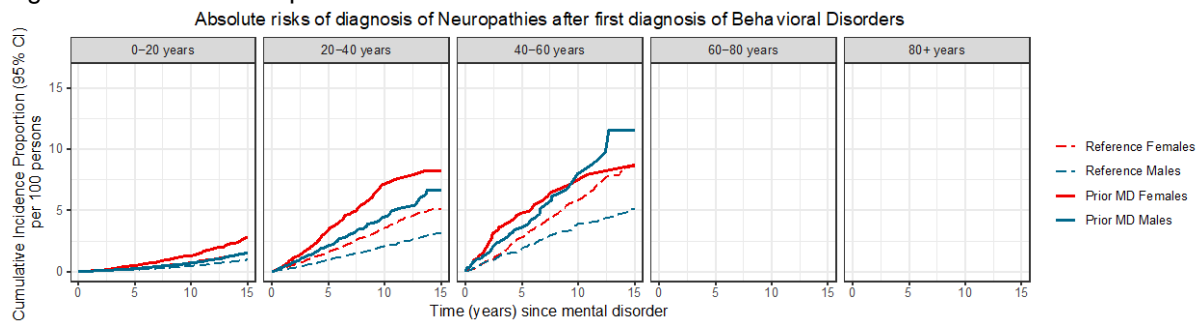



## Supplementary Material - Association between Mental Disorders and Later Medical Conditions

| <b>Table S1. Diagnostic classification of mental disorders considered in this study according to the ICD-10 and equivalent ICD-8 diagnoses</b>                                                                   |                                            |               |                                                                        |                                                |
|------------------------------------------------------------------------------------------------------------------------------------------------------------------------------------------------------------------|--------------------------------------------|---------------|------------------------------------------------------------------------|------------------------------------------------|
| <b>Mental disorders</b><br><i>Examples of diagnoses included in each group</i>                                                                                                                                   | <b>Abbreviated name used in this study</b> | <b>ICD-10</b> | <b>ICD-8 equivalency</b>                                               | <b>Earliest possible age at onset in years</b> |
| Organic, including symptomatic, mental disorders<br><i>Includes dementia in Alzheimer's disease, vascular dementia, etc.</i>                                                                                     | Organic Disorders                          | F00 – F09     | 290.09, 290.10, 290.11, 290.18, 290.19, 292.x9, 293.x9, 294.x9, 309.x9 | 35                                             |
| Mental and behavioral disorders due to psychoactive substance use<br><i>Includes use of alcohol, cannabis, cocaine, nicotine, opioids, sedatives, hypnotics, anxiolytics, etc.</i>                               | Substance Use Disorders                    | F10 – F19     | 291.x9, 294.39, 303.x9, 303.20, 303.28, 303.90, 304.x9                 | 10                                             |
| Schizophrenia and related disorders<br><i>Includes schizophrenia, schizotypal disorders, schizoaffective disorders and other psychotic disorders.</i>                                                            | Schizophrenia                              | F20 – F29     | 295.x9, 296.89, 297.x9, 298.29-298.99, 299.04, 299.05, 299.09, 301.83  | 10                                             |
| Mood disorders<br><i>Includes bipolar disorder, depressive disorders, etc.</i>                                                                                                                                   | Mood Disorders                             | F30 – F39     | 296.x9 (excluding 296.89), 298.09, 298.19, 300.49, 301.19              | 10                                             |
| Neurotic, stress-related, and somatoform disorders<br><i>Includes anxiety disorders, phobias, obsessive-compulsive disorders, etc.</i>                                                                           | Neurotic Disorders                         | F40 – F48     | 300.x9 (excluding 300.49), 305.x9, 305.68, 307.99                      | 5                                              |
| Eating disorders<br><i>Includes anorexia nervosa, bulimia nervosa, etc.</i>                                                                                                                                      | Eating Disorders                           | F50           | 305.60, 306.50, 306.58, 306.59                                         | 1                                              |
| Specific personality disorders                                                                                                                                                                                   | Personality Disorders                      | F60           | 301.x9 (excluding 301.19), 301.80, 301.81, 301.82, 301.84              | 10                                             |
| Intellectual Disabilities                                                                                                                                                                                        | Intellectual Disabilities                  | F70 – F79     | 311.xx, 312.xx, 313.xx, 314.xx, 315.xx                                 | 1                                              |
| Pervasive developmental disorders<br><i>Includes autism spectrum disorder</i>                                                                                                                                    | Developmental Disorders                    | F84           | 299.00, 299.01, 299.02, 299.03                                         | 1                                              |
| Behavioral and emotional disorders with onset usually occurring in childhood and adolescence<br><i>Includes attention-deficit hyperactivity disorder, conduct disorders, childhood emotional disorders, etc.</i> | Behavioral Disorders                       | F90 – F98     | 306.x9, 308-0x                                                         | 1                                              |

## Supplementary Material - Association between Mental Disorders and Later Medical Conditions

| Table S2. Coding algorithm for each general medical condition category and specific general medical condition |                                                                                          |                                              |                                       |                              |
|---------------------------------------------------------------------------------------------------------------|------------------------------------------------------------------------------------------|----------------------------------------------|---------------------------------------|------------------------------|
| Category                                                                                                      | Coding definition                                                                        | Diagnosis/ mortality codes (ICD-10)          | Medication<br>Drug codes (ATC)        | Time frame for prescriptions |
| <b>CIRCULATORY SYSTEM</b>                                                                                     |                                                                                          |                                              |                                       |                              |
| Hypertension                                                                                                  | Diagnosis AND/OR prescriptions of antihypertensives <sup>a</sup>                         | I10-I13, I15                                 | C02, C03, C04, C07, C08, C09          | Twice in 1 year              |
| Dyslipidemia                                                                                                  | Diagnosis AND/OR prescription of lipid-lowering drugs <sup>b</sup>                       | E78                                          | C10                                   | Twice in 1 year              |
| Ischemic heart disease                                                                                        | Diagnosis AND/OR prescription for antianginal drug                                       | I20-I25                                      | C01DA                                 | Twice in 1 year              |
| Atrial fibrillation                                                                                           | Diagnosis                                                                                | I48                                          |                                       |                              |
| Heart failure                                                                                                 | Diagnosis                                                                                | I50                                          |                                       |                              |
| Peripheral artery occlusive disease                                                                           | Diagnosis                                                                                | I70-I74                                      |                                       |                              |
| Stroke                                                                                                        | Diagnosis                                                                                | I60-I64, I69                                 |                                       |                              |
| <b>ENDOCRINE SYSTEM</b>                                                                                       |                                                                                          |                                              |                                       |                              |
| Diabetes mellitus                                                                                             | Diagnosis AND/OR prescription of antidiabetics                                           | E10-E14                                      | A10A, A10B                            | Twice in 1 year              |
| Thyroid disorder                                                                                              | Diagnosis AND/OR prescription of thyroid therapy drugs                                   | E00-E05, E061-E069, E07                      | H03                                   | Twice in 1 year              |
| Gout                                                                                                          | Diagnosis                                                                                | E79, M10                                     |                                       |                              |
| <b>PULMONARY SYSTEM AND ALLERGY</b>                                                                           |                                                                                          |                                              |                                       |                              |
| Chronic pulmonary disease                                                                                     | Diagnosis AND/OR Prescription for obstructive airway disease drugs                       | J40-J47                                      | R03                                   | Twice in 1 year              |
| Allergy                                                                                                       | Diagnosis AND/OR Prescription for non-sedative antihistamines AND/OR nasal antiallergics | J30.1-J30.4, L23, L50.0, T78.0, T78.2, T78.4 | R06AX, R06AE07, R06AE09, R01AC, R01AD | Twice in 1 year              |
| <b>GASTROINTESTINAL SYSTEM</b>                                                                                |                                                                                          |                                              |                                       |                              |
| Ulcer/chronic gastritis                                                                                       | Diagnosis                                                                                | K221, K25-K28, K293-K295                     |                                       |                              |
| Chronic liver disease                                                                                         | Diagnosis                                                                                | B16-B19, K70, K74, K766, I85                 |                                       |                              |
| Inflammatory bowel disease                                                                                    | Diagnosis                                                                                | K50-K51                                      |                                       |                              |
| Diverticular disease of intestine                                                                             | Diagnosis                                                                                | K57                                          |                                       |                              |

## Supplementary Material - Association between Mental Disorders and Later Medical Conditions

| <b>UROGENITAL SYSTEM</b>      |                                                                     |                                    |                                  |                 |
|-------------------------------|---------------------------------------------------------------------|------------------------------------|----------------------------------|-----------------|
| Chronic kidney disease        | Diagnosis                                                           | N03, N11, N18-N19                  |                                  |                 |
| Prostate disorders            | Diagnosis AND/OR prescription of prostate hyperplasia therapy drugs | N40                                | C02CA, G04C                      | Twice in 1 year |
| <b>MUSCULOSKELETAL SYSTEM</b> |                                                                     |                                    |                                  |                 |
| Connective tissue disorders   | Diagnosis                                                           | M05-M06, M08-M09, M30-M36, D86     |                                  |                 |
| Osteoporosis                  | Diagnosis AND/OR prescription for osteoporosis drugs                | M80-M82                            | M05B, G03XC01, H05AA             | Twice in 1 year |
| Painful condition             | Repeated prescriptions of analgesics                                |                                    | N02A, N02BA51, N02BE, M01A, M02A | 4x in 1 year    |
| <b>HEMATOLOGICAL SYSTEM</b>   |                                                                     |                                    |                                  |                 |
| HIV/AIDS                      | Diagnosis                                                           | B20-B24                            |                                  |                 |
| Anemias                       | Diagnosis                                                           | D50-D53, D55-D59, D60-D61, D63-D64 |                                  |                 |
| <b>CANCERS</b>                |                                                                     |                                    |                                  |                 |
|                               | Diagnosis                                                           | C00-C43, C45-C97                   |                                  |                 |
| <b>NEUROLOGICAL SYSTEM</b>    |                                                                     |                                    |                                  |                 |
| Vision problem                | Diagnosis                                                           | H40, H25, H54                      |                                  |                 |
| Hearing problem               | Diagnosis                                                           | H90-H91, H931                      |                                  |                 |
| Migraine                      | Diagnosis AND/OR prescription of specific anti-migraine drugs       | G43                                | N02C                             | Twice in 1 year |
| Epilepsy                      | Diagnosis AND prescription of anti-epileptics                       | G40-G41                            | N03                              | Twice in 1 year |
| Parkinson's disease           | Diagnosis                                                           | G20-G22                            |                                  |                 |
| Multiple sclerosis            | Diagnosis                                                           | G35                                |                                  |                 |
| Neuropathies                  | Diagnosis                                                           | G50-G64                            |                                  |                 |

<sup>a</sup>Ascertained only in absence of ischemic heart disease/heart failure, and by diuretics only if no kidney disease

<sup>b</sup>Prescriptions used if no previous ischemic heart disease

## Supplementary Material - Association between Mental Disorders and Later Medical Conditions

| <b>Table S3. Frequencies of persons at risk and incident cases for each general medical condition category and specific general medical condition, in the total cohort of 5,940,299 individuals</b> |                                  |                                       |                            |
|-----------------------------------------------------------------------------------------------------------------------------------------------------------------------------------------------------|----------------------------------|---------------------------------------|----------------------------|
| Category                                                                                                                                                                                            | Prevalent cases before follow-up | Persons at risk at start of follow-up | New cases during follow-up |
| <b>CIRCULATORY SYSTEM</b>                                                                                                                                                                           | 744,738                          | 5,195,561                             | 1,359,330                  |
| Hypertension                                                                                                                                                                                        | 619,788                          | 5,320,511                             | 1,095,310                  |
| Dyslipidemia                                                                                                                                                                                        | 177,355                          | 5,762,679                             | 671,523                    |
| Ischemic heart disease                                                                                                                                                                              | 139,554                          | 5,800,745                             | 392,187                    |
| Atrial fibrillation                                                                                                                                                                                 | 44,123                           | 5,896,176                             | 275,360                    |
| Heart failure                                                                                                                                                                                       | 34,872                           | 5,905,427                             | 200,040                    |
| Peripheral artery occlusive disease                                                                                                                                                                 | 35,941                           | 5,904,358                             | 172,114                    |
| Stroke                                                                                                                                                                                              | 53,168                           | 5,887,131                             | 283,217                    |
| <b>ENDOCRINE SYSTEM</b>                                                                                                                                                                             | 192,693                          | 5,747,606                             | 509,365                    |
| Diabetes mellitus                                                                                                                                                                                   | 98,567                           | 5,841,732                             | 291,750                    |
| Thyroid disorder                                                                                                                                                                                    | 93,790                           | 5,846,509                             | 232,243                    |
| Gout                                                                                                                                                                                                | 7,037                            | 5,933,262                             | 38,880                     |
| <b>PULMONARY SYSTEM &amp; ALLERGY</b>                                                                                                                                                               | 915,893                          | 5,024,406                             | 1,152,776                  |
| Chronic pulmonary disease                                                                                                                                                                           | 599,388                          | 5,340,911                             | 723,876                    |
| Allergy                                                                                                                                                                                             | 426,073                          | 5,514,226                             | 752,375                    |
| <b>GASTROINTESTINAL SYSTEM</b>                                                                                                                                                                      | 81,716                           | 5,858,583                             | 327,697                    |
| Ulcer/chronic gastritis                                                                                                                                                                             | 40,399                           | 5,899,900                             | 130,746                    |
| Chronic liver disease                                                                                                                                                                               | 10,737                           | 5,929,562                             | 47,060                     |
| Inflammatory bowel disease                                                                                                                                                                          | 16,592                           | 5,923,707                             | 49,588                     |
| Diverticular disease of intestine                                                                                                                                                                   | 17,346                           | 5,922,953                             | 136,560                    |
| <b>UROGENITAL SYSTEM</b>                                                                                                                                                                            | 76,138                           | 5,864,161                             | 263,343                    |
| Chronic kidney disease                                                                                                                                                                              | 7,224                            | 5,933,075                             | 89,798                     |
| Prostate disorders <sup>a</sup>                                                                                                                                                                     | 69,831                           | 2,888,204                             | 195,111                    |
| <b>MUSCULOSKELETAL SYSTEM</b>                                                                                                                                                                       | 542,215                          | 5,398,084                             | 1,397,516                  |
| Connective tissue disorders                                                                                                                                                                         | 36,829                           | 5,903,470                             | 118,492                    |
| Osteoporosis                                                                                                                                                                                        | 31,220                           | 5,909,079                             | 249,455                    |
| Painful condition                                                                                                                                                                                   | 515,211                          | 5,425,088                             | 1,318,615                  |
| <b>HEMATOLOGICAL SYSTEM</b>                                                                                                                                                                         | 24,754                           | 5,915,545                             | 218,753                    |

**Supplementary Material - Association between Mental Disorders and Later Medical Conditions**

|                            |         |           |         |
|----------------------------|---------|-----------|---------|
| HIV/AIDS                   | 1,525   | 5,938,774 | 2,628   |
| Anemias                    | 23,297  | 5,917,002 | 216,427 |
| <b>CANCERS</b>             | 83,135  | 5,857,164 | 481,012 |
| <b>NEUROLOGICAL SYSTEM</b> | 330,553 | 5,609,746 | 915,021 |
| Vision problem             | 69,378  | 5,870,921 | 379,498 |
| Hearing problem            | 130,021 | 5,810,278 | 292,008 |
| Migraine                   | 83,184  | 5,857,115 | 169,647 |
| Epilepsy                   | 22,062  | 5,918,237 | 55,924  |
| Parkinson's disease        | 5,111   | 5,935,188 | 23,054  |
| Multiple sclerosis         | 6,250   | 5,934,049 | 12,615  |
| Neuropathies               | 38,841  | 5,901,458 | 231,289 |

<sup>a</sup> Only males "at risk" for prostate disorders - 2,958,035 males in the cohort

**Supplementary Material - Association between Mental Disorders and Later Medical Conditions**

| <b>Table S4. Baseline characteristics of the study population</b> |                                             |           |             |
|-------------------------------------------------------------------|---------------------------------------------|-----------|-------------|
| <b>Sex</b>                                                        | Men                                         | 2,958,035 | 49.8%       |
|                                                                   | Women                                       | 2,982,264 | 50.2%       |
| <b>Birth year</b>                                                 | 1900-1910                                   | 37,908    | 0.6%        |
|                                                                   | 1911-1920                                   | 192,783   | 3.3%        |
|                                                                   | 1921-1930                                   | 357,663   | 6.0%        |
|                                                                   | 1931-1940                                   | 470,614   | 7.9%        |
|                                                                   | 1941-1950                                   | 709,860   | 12.0%       |
|                                                                   | 1951-1960                                   | 680,633   | 11.5%       |
|                                                                   | 1961-1970                                   | 724,485   | 12.2%       |
|                                                                   | 1971-1980                                   | 636,257   | 10.7%       |
|                                                                   | 1981-1990                                   | 542,310   | 9.1%        |
|                                                                   | 1991-2000                                   | 662,677   | 11.2%       |
|                                                                   | 2001-2010                                   | 638,698   | 10.8%       |
|                                                                   | 2011-2015                                   | 286,411   | 4.8%        |
|                                                                   | <b>Age at start of follow-up, med (IQR)</b> |           | 32.1        |
| <b>Age at end of follow-up, med (IQR)</b>                         |                                             | 48.7      | (24.3-68.6) |

All results presented in n (%) unless stated otherwise

**REFERENCES**

1. Pedersen CB. The Danish Civil Registration System. *Scand J Public Health*. 2011;39(7 Suppl):22-5.
2. Mors O, Perto GP, Mortensen PB. The Danish Psychiatric Central Research Register. *Scandinavian Journal of Public Health*. 2011;39(7 Suppl):54-7.
3. World Health Organization. International classification of diseases: Manual of the international statistical classification of diseases, injuries and causes of death (ICD-8). Geneva: WHO; 1967.
4. World Health Organization. International classification of diseases and related health problems, 10th revision. Geneva: World Health Organization; 1992.
5. Prior A, Fenger-Gron M, Larsen KK, Larsen FB, Robinson KM, Nielsen MG, et al. The Association Between Perceived Stress and Mortality Among People With Multimorbidity: A Prospective Population-Based Cohort Study. *Am J Epidemiol*. 2016;184(3):199-210.
6. Lynge E, Sandegaard JL, Rebolj M. The Danish National Patient Register. *Scandinavian Journal of Public Health*. 2011;39(7 Suppl):30-3.
7. Kildemoes HW, Sorensen HT, Hallas J. The Danish National Prescription Registry. *Scand J Public Health*. 2011;39(7 Suppl):38-41.
8. Helweg-Larsen K. The Danish Register of Causes of Death. *Scand J Public Health*. 2011;39(7 Suppl):26-9.
9. Plana-Ripoll O, Pedersen CB, Holtz Y, Benros ME, Dalsgaard S, de Jonge P, et al. Exploring Comorbidity Within Mental Disorders Among a Danish National Population. *JAMA Psychiatry*. 2019.
10. Xu R, O'Quigley J. Estimating average regression effect under non-proportional hazards. *Biostatistics*. 2000;1(4):423-39.
11. Berkson J. Limitations of the application of fourfold table analysis to hospital data. *Biometrics*. 1946;2(3):47-53.
12. Benros ME, Laursen TM, Dalton SO, Mortensen PB. Psychiatric disorder as a first manifestation of cancer: a 10-year population-based study. *Int J Cancer*. 2009;124(12):2917-22.
13. Musliner KL, Liu X, Gasse C, Christensen KS, Wimberley T, Munk-Olsen T. Incidence of medically treated depression in Denmark among individuals 15-44 years old: a comprehensive overview based on population registers. *Acta Psychiatr Scand* 2019;139:548-57.
